# Supplementary material for: Identification of Novel Mrna Isoforms Associated with Acute Heat Stress Response Using RNA-Sequencing Data in The Sprague-Dawley Rats
Source: Preprints.org preprint supplement (doi:10.20944/preprints202211.0380.v1), 2022-11-21
Supplement: Supplementary file 1 [file Table S1 Mapping summary.xlsx]

## Sheet: Sheet1
Table S1. Overview of the mapping information in blood, liver and adrenal gland tissues under various heat stress conditions.
Comparison	Sample	Read count	Reads mapped in pairs %	Broken pairs %	Non-mapped reads %	uniquely mapped reads	Map to genes %	Mapped to intergenic %
Blood CT vs. H120	Blood_CT1	70809870	76.47	20.84	2.69	54651044	99.7	0.3
	Blood_CT2	62033200	74.11	23.26	2.63	47410725	99.61	0.39
	Blood_CT3	70235814	77.91	18.51	3.58	57680965	99.72	0.28
	Blood_CT4	59413984	78.36	17.31	4.33	47672612	98.92	1.08
	Means	65623217	76.7125	19.98	3.3075	5.18538e+07	99.4875	0.5125
	Blood_H120_1	72505438	71.15	25.59	3.26	56283100	99.68	0.32
	Blood_H120_2	63610226	79.06	16.81	4.13	188415800	99.72	0.28
	Blood_H120_3	97059004	81.23	14.46	4.3	82105584	99.67	0.33
	Blood_H120_4	66567392	78.43	17.48	4.1	54781416	99.72	0.28
	Means	74935515	77.4675	18.585	3.9475	95396475	99.6975	0.3025
Liver CT vs. H30	Liver_CT1	74105438	92.34	4.35	3.31	606937193	97.96	2.04
	Liver_CT2	64347374	90.43	5.81	3.76	58096916	98.14	1.86
	Liver_CT3	53513200	95.23	2.88	1.89	48847348	98.02	1.99
	Liver_CT4	52510642	87.84	6.4	5.76	46276877	97.86	2.14
	Liver_CT5	59339084	94.38	2.48	3.14	53572953	97.78	2.22
	Means	6.07631e+07	92.044	4.384	3.572	1.62746e+08	97.952	2.05
	Liver_H30_1	74901190	93.2	4.13	2.67	67271033	97.91	2.09
	Liver_H30_2	77359772	92.83	4.44	2.73	5860216	97.7	2.3
	Liver_H30_3	75175996	92.85	4.02	3.13	66869720	97.69	2.31
	Liver_H30_4	73100258	92.18	4.68	3.13	64945835	97.93	2.07
	Liver_H30_5	72766764	94.02	3.31	2.67	65179915	98.1	1.9
	Means	74660796	93.016	4.116	2.866	5.40253e+07	97.866	2.134
Liver CT vs. H60	Liver_CT1	74105438	90.12	5.29	4.59	66518496	98.64	1.36
	Liver_CT2	64347374	90.53	5.76	3.71	58127050	98.31	1.69
	Liver_CT3	53513200	95.3	2.87	1.83	48867099	98.18	1.82
	Liver_CT4	52510642	87.91	6.38	5.71	46296187	98.04	1.95
	Liver_CT5	59339084	94.42	2.48	3.1	53585254	97.92	2.08
	Means	6.07631e+07	91.656	4.556	3.788	5.46788e+07	98.218	1.78
	Liver_H60_1	84326020	93.7	3.95	2.35	76839056	98.68	1.32
	Liver_H60_2	82898586	93.42	4.19	2.39	75461869	98.35	1.65
	Liver_H60_3	86698784	93.43	3.83	2.74	77046389	97.95	2.05
	Liver_H60_4	95872622	94.09	3.19	2.72	86460780	98.62	1.38
	Liver_H60_5	81278374	94.06	3.56	2.38	73706144	98.58	1.42
	Means	8.62149e+07	93.74	3.744	2.516	7.79028e+07	98.436	1.564
Liver CT vs. H120	Liver_CT1	74105438	90.07	5.31	4.62	66508045	98.55	1.45
	Liver_CT2	64347374	91.11	5.14	3.76	58117007	98.2	1.8
	Liver_CT3	53513200	95.23	2.89	1.88	48855367	98.07	1.93
	Liver_CT4	52510642	87.51	6.73	5.76	46280712	97.92	2.08
	Liver_CT5	59339084	94.36	2.5	3.14	53577674	97.83	2.17
	Means	6.07631e+07	91.656	4.514	3.832	54667761	98.114	1.886
	Liver_H120_1	53978328	88.08	6.22	5.71	47205100	98.46	1.54
	Liver_H120_2	55764470	87.85	6.94	5.21	49335938	98.62	1.38
	Liver_H120_3	61440236	87.9	6.99	5.12	54566844	98.48	1.52
	Liver_H120_4	77632214	90.89	5.96	3.15	70760536	98.56	1.44
	Liver_H120_5	69491974	84.8	9.14	6.05	61226732	98.59	1.41
	Means	6.36614e+07	87.904	7.05	5.048	56619030	98.542	1.458
Adrenal glands CT vs. H30	Adrenal glands_CT1	53991038	94.29	3.25	2.45	47059652	97.55	2.45
	Adrenal glands_CT2	67994712	92.04	4.11	3.85	57944015	96.76	3.24
	Adrenal glands_CT3	61623484	92.77	3.77	3.46	52901512	97.35	2.65
	Adrenal glands_CT4	51706978	95.3	2.69	2.01	45798155	97.45	2.55
	Adrenal glands_CT5	57712120	92.54	4.63	2.84	50834373	97.5	2.5
	Means	5.86057e+07	93.388	3.69	2.922	5.09075e+07	97.322	2.678
	Adrenal glands_H30_1	81073982	92.83	4.59	2.58	70881969	97.35	2.65
	Adrenal glands_H30_2	68594740	94	3.54	2.46	60154429	97.53	2.47
	Adrenal glands_H30_3	69900098	93.41	3.52	3.07	60071648	97.7	2.3
	Adrenal glands_H30_4	68844118	93.54	4.01	2.44	60536475	97.57	2.43
	Adrenal glands_H30_5	64072690	93.8	3.79	2.41	55924510	97.61	2.39
	Means	7.04971e+07	93.516	3.89	2.592	6.15138e+07	97.552	2.448
Adrenal glands CT vs. H60	Adrenal glands_CT1	53991038	94.27	3.26	2.47	47058064	97.55	2.45
	Adrenal glands_CT2	67994712	92.02	4.12	3.86	57940963	96.77	3.23
	Adrenal glands_CT3	61623484	93.33	3.2	3.47	52911391	97.34	2.66
	Adrenal glands_CT4	51706978	95.32	2.66	2.02	45793219	97.45	2.55
	Adrenal glands_CT5	57712120	92.52	4.63	2.85	50825880	97.53	2.47
	Means	5.86057e+07	93.492	3.574	2.934	5.09059e+07	97.328	2.672
	Adrenal glands_H60_1	78274224	93.26	4.17	2.57	67431218	97.45	2.54
	Adrenal glands_H60_2	63573622	92.71	4.54	2.75	54779320	97.38	2.62
	Adrenal glands_H60_3	68400684	92.66	4.59	2.75	58491007	97.42	2.58
	Adrenal glands_H60_4	72656090	93.03	4.42	2.55	61778798	97.38	2.62
	Adrenal glands_H60_5	58145214	92.89	4.52	2.6	49893497	97.02	2.98
	Means	6.821e+07	92.91	4.448	2.644	58474768	97.33	2.668
Adrenal glands CT vs. H120	Adrenal glands_CT1	53991038	94.25	3.27	2.48	47061366	97.51	2.49
	Adrenal glands_CT2	67994712	92	4.13	3.87	57939556	96.73	3.27
	Adrenal glands_CT3	61623484	93.58	2.95	3.47	52915831	97.32	2.68
	Adrenal glands_CT4	51706978	95.32	2.65	2.03	45793802	97.39	2.61
	Adrenal glands_CT5	57712120	92.34	4.81	2.85	50823747	97.47	2.53
	Means	5.86057e+07	93.498	3.562	2.94	5.09069e+07	97.284	2.716
	Adrenal glands_H120_1	67209702	87.17	7.53	5.3	55998525	96.85	3.15
	Adrenal glands_H120_2	61742408	87.71	7.14	5.15	52014168	97.16	2.84
	Adrenal glands_H120_3	68202116	87.65	7.4	4.95	58136397	97.01	2.97
	Adrenal glands_H120_4	66671020	91.33	4.95	3.73	57965971	97.14	2.86
	Adrenal glands_H120_5	66885812	88.37	6.22	5.41	56775868	96.56	3.44
	Means	6.61422e+07	88.446	6.648	4.908	5.61782e+07	96.944	3.052
