# Supplementary material for: Identification of Novel Mrna Isoforms Associated with Acute Heat Stress Response Using RNA-Sequencing Data in The Sprague-Dawley Rats
Source: Preprints.org preprint supplement (doi:10.20944/preprints202211.0380.v1), 2022-11-21
Supplement: Supplementary file 2 [file Table S2_Blood_all_transcripts.xlsx]

## Sheet: Title
Table S2. The differentially expressed mRNA isoforms (P < 0.05, |FC| > 2) identified in blood in CT vs. H120.

## Sheet: DEIs
The known differentially expressed mRNA isoforms (P < 0.05, |FC| > 2) identified in blood in CT vs. H120.
Transcript ID	Transcript Name	Gene ID	Position	Transcript length (bp*)	P-value	FC
ENSRNOT00000013884	Cnbp-201	ENSRNOG00000010239.6	4:119747910-119756765	1642	7.21708e-06	79.9188
ENSRNOT00000019052	Klf2-201	ENSRNOG00000014205.2	16:19223086-19225037	1056	3.12419e-05	106.071
ENSRNOT00000010826	Wbp2-201	ENSRNOG00000007971.6	10:104630572-104637823	793	7.05057e-05	72.2979
ENSRNOT00000007747	Lyz2-201	ENSRNOG00000005825.8	7:60335968-60341264	1190	7.35735e-05	-4.02697
ENSRNOT00000030043	Rpl11-201	ENSRNOG00000026260.6	5:154390847-154394328	537	8.33545e-05	206.842
ENSRNOT00000023003	Ybx2-201	ENSRNOG00000017117.7	10:56546709-56551863	1150	0.000146918	16.8107
ENSRNOT00000043171	Rpl36al-201	ENSRNOG00000031315.2	10:57251252-57251573	321	0.000175008	134.631
ENSRNOT00000030754	LOC691418-201	ENSRNOG00000025980.1	3:110982552-110983098	546	0.000255716	44.8676
ENSRNOT00000015612	S100a6-201	ENSRNOG00000011647.5	2:190007215-190008511	472	0.000285206	-6.40007
ENSRNOT00000005939	Fam117a-201	ENSRNOG00000004417.5	10:83154422-83198679	2705	0.000405606	12.805
ENSRNOT00000012494	Fcnb-201	ENSRNOG00000009342.6	3:6617750-6626284	1283	0.000450422	-7.91335
ENSRNOT00000000079	Acot7-201	ENSRNOG00000010580.8	5:169357516-169450219	1499	0.000478447	6.34672
ENSRNOT00000074873	LOC100911319-201	ENSRNOG00000050108.1	7:2351932-2353875	1449	0.000499093	12.7504
ENSRNOT00000072458	RT1-DMa-201	ENSRNOG00000047854.2	20:3935528-3938915	1071	0.000502062	-8.04395
ENSRNOT00000003733	Sell-201	ENSRNOG00000002776.6	13:82369492-82387631	1762	0.000519672	22.0536
ENSRNOT00000000523	RT1-Ba-201	ENSRNOG00000000451.5	20:4066131-4070721	1115	0.000967822	-4.25174
ENSRNOT00000021091	Hypk-201	ENSRNOG00000015703.6	3:113423692-113424846	390	0.00131327	9.02387
ENSRNOT00000047078	AABR07071000.1-201	ENSRNOG00000051416.1	8:95943732-95944086	354	0.00173458	39.2283
ENSRNOT00000049774	Hopx-201	ENSRNOG00000024689.6	14:33354806-33362551	1038	0.00262258	-4.85937
ENSRNOT00000070897	P4ha1-201	ENSRNOG00000050655.1	20:28920615-28971966	2121	0.00297928	12.0341
ENSRNOT00000054976	Actg1-201	ENSRNOG00000036701.4	10:109519133-109520846	1128	0.00362952	23.1873
ENSRNOT00000051064	Cdc25b-201	ENSRNOG00000021248.5	3:123731538-123741339	2795	0.00386624	5.61887
ENSRNOT00000023606	Atp6v0d1-201	ENSRNOG00000017235.6	19:37481781-37525762	1585	0.00419746	28.1342
ENSRNOT00000079055	7SK.281-201	ENSRNOG00000058555.1	8:85480291-85480622	331	0.00506639	19.8686
ENSRNOT00000061114	RT1-CE7-202	ENSRNOG00000031090.6	20:4694471-4896970	1753	0.0053199	2.84844
ENSRNOT00000018318	S1pr1-201	ENSRNOG00000013683.3	2:218654553-218658761	2571	0.00553408	8.79029
ENSRNOT00000024430	Vim-201	ENSRNOG00000018087.5	17:80882665-80891212	1857	0.00616498	-2.4952
ENSRNOT00000078910	Gm2a-201	ENSRNOG00000052219.1	10:40438355-40450930	2044	0.0063056	-4.11886
ENSRNOT00000022977	Ube2s-201	ENSRNOG00000016930.5	1:72580423-72584482	946	0.0064479	2.33997
ENSRNOT00000016792	Saraf-201	ENSRNOG00000012329.6	16:61735180-61753476	1885	0.00851981	2.98224
ENSRNOT00000013563	Sdcbp-201	ENSRNOG00000009683.7	5:19471663-19498485	2045	0.00927248	2.86431
ENSRNOT00000071708	Tmsb4x-201	ENSRNOG00000047931.2	X:28593404-28595395	594	0.0104084	-2.2138
ENSRNOT00000073492	Eif6-201	ENSRNOG00000049497.2	3:151356867-151363115	1224	0.0112543	16.5256
ENSRNOT00000022747	Uqcr11-201	ENSRNOG00000016952.5	7:12171184-12175835	508	0.0113515	2.91468
ENSRNOT00000032249	Hcar2-201	ENSRNOG00000026653.1	12:38160463-38161546	1083	0.0114236	4.9607
ENSRNOT00000015958	S100a4-201	ENSRNOG00000011821.4	2:189997128-189999604	653	0.0118416	-2.68895
ENSRNOT00000042108	AC115277.1-201	ENSRNOG00000004662.6	7:15385867-15386419	552	0.0119876	4.08519
ENSRNOT00000028284	Tyrobp-201	ENSRNOG00000020845.6	1:88875374-88879303	603	0.0125949	-2.10611
ENSRNOT00000081958	Dnajb2-202	ENSRNOG00000019506.7	9:82436515-82444668	1820	0.012858	2.54726
ENSRNOT00000027937	Psmd8-201	ENSRNOG00000037580.2	1:88116811-88123643	1519	0.0144148	-20.6112
ENSRNOT00000014216	Lgals3-201	ENSRNOG00000010645.5	15:24153601-24165537	948	0.01474	-4.43125
ENSRNOT00000047779	RT1-CE4-202	ENSRNOG00000039744.5	20:4673657-4935414	1558	0.0157791	2.48786
ENSRNOT00000088597	Metazoa_SRP.22-201	ENSRNOG00000058083.1	6:91680228-91680528	300	0.0162887	7.21962
ENSRNOT00000079854	Tubb5-201	ENSRNOG00000061216.1	20:3422488-3426371	2128	0.0173704	2.97166
ENSRNOT00000020707	Gng10-201	ENSRNOG00000025040.6	5:76182120-76189013	1072	0.0175072	-2.74601
ENSRNOT00000083188	Clec2g-201	ENSRNOG00000059538.1	4:162937773-162943981	1946	0.017961	-3.33066
ENSRNOT00000075342	RT1-DMb-201	ENSRNOG00000049491.2	20:3945600-3952846	1301	0.0180096	-6.11535
ENSRNOT00000008022	Tcf7-201	ENSRNOG00000005872.7	10:37617278-37645802	1550	0.0183394	9.90116
ENSRNOT00000073474	LOC108348139-201	ENSRNOG00000051002.2	20:5227044-5234290	1301	0.0192573	-6.13764
ENSRNOT00000005251	Rgs1-201	ENSRNOG00000003895.7	13:61066152-61070599	1366	0.0198056	2.87864
ENSRNOT00000025824	Cct3-201	ENSRNOG00000019090.6	2:187668795-187693610	2128	0.0206034	2.49926
ENSRNOT00000023944	Mylpf-201	ENSRNOG00000017645.6	1:198655741-198658583	731	0.0209783	6.32869
ENSRNOT00000015756	Rpl22l1-201	ENSRNOG00000011817.6	2:115362798-115364729	560	0.0213069	-2.10011
ENSRNOT00000087162	Bst2-201	ENSRNOG00000059900.1	16:19939235-19942343	519	0.0215077	3.4069
ENSRNOT00000010433	Plod1-201	ENSRNOG00000007763.7	5:164720586-164747083	2949	0.0220275	6.4038
ENSRNOT00000003458	Socs1-201	ENSRNOG00000002568.3	10:4957325-4958461	1136	0.0232402	4.41299
ENSRNOT00000020348	Tnnc2-201	ENSRNOG00000015155.6	3:161243586-161246351	752	0.0270285	12.8374
ENSRNOT00000026470	Jund-201	ENSRNOG00000019568.6	16:20485028-20486707	1679	0.0273279	2.59852
ENSRNOT00000082705	Rn7sl1-201	ENSRNOG00000061096.1	6:91456907-91457207	300	0.028067	9.84383
ENSRNOT00000011898	Ago2-201	ENSRNOG00000008533.4	7:114339433-114380613	3116	0.0282275	7.99433
ENSRNOT00000060327	RT1-Db1-202	ENSRNOG00000033215.6	20:4087643-4097089	1100	0.0285517	-3.09868
ENSRNOT00000024084	Acta1-201	ENSRNOG00000017786.6	19:56674073-56677084	1436	0.0286913	21.1074
ENSRNOT00000080887	G6pd-201	ENSRNOG00000056728.1	X:156274799-156293926	2380	0.0287422	4.60705
ENSRNOT00000072494	LOC288913-201	ENSRNOG00000049931.2	19:25355814-25358594	660	0.0327969	6.37695
ENSRNOT00000010712	Fos-201	ENSRNOG00000008015.5	6:109300432-109303299	1589	0.0333954	11.0171
ENSRNOT00000044575	LOC100362384-201	ENSRNOG00000031540.5	13:89253616-89254171	555	0.0336395	4.32387
ENSRNOT00000067780	Junb-201	ENSRNOG00000042838.3	19:26092973-26094756	1783	0.034759	2.26041
ENSRNOT00000091906	Bst2-202	ENSRNOG00000059900.1	16:19938783-19942353	787	0.0355334	3.13546
ENSRNOT00000027815	Scamp3-202	ENSRNOG00000020500.6	2:188489361-188495145	1479	0.0358639	2.60067
ENSRNOT00000049848	Cdkn1b-201	ENSRNOG00000007249.4	4:168689162-168693964	1755	0.0375948	9.98998
ENSRNOT00000027989	Snrnp25-201	ENSRNOG00000020626.7	10:15686007-15689325	767	0.0381722	19.674
ENSRNOT00000013188	Timm8b-201	ENSRNOG00000009888.5	8:55037749-55039128	485	0.0385123	5.73123
ENSRNOT00000006306	Cd48-201	ENSRNOG00000004737.7	13:90116842-90140371	1422	0.040688	-3.00799
ENSRNOT00000076191	Slpi-201	ENSRNOG00000046699.3	3:160799980-160802433	856	0.0413014	-2.75855
ENSRNOT00000049856	AABR07041778.1-201	ENSRNOG00000034150.5	X:139475654-139476206	552	0.0429439	3.73822
ENSRNOT00000057898	Mt1-201	ENSRNOG00000038047.3	17:78793335-78793724	389	0.0449197	2.9152
ENSRNOT00000049001	H3f3c-201	ENSRNOG00000032401.3	7:94777701-94778696	995	0.0460541	-2.30649
ENSRNOT00000008687	Memo1-201	ENSRNOG00000006340.6	6:22362483-22409579	1321	0.0462027	-3.12922
ENSRNOT00000026699	Pycard-201	ENSRNOG00000019675.4	1:199437831-199439210	927	0.0468911	-2.51648
ENSRNOT00000080351	Cenpb-201	ENSRNOG00000057284.1	3:123721485-123723524	2039	0.0475808	2.41266
ENSRNOT00000065729	LOC100910882-201	ENSRNOG00000049814.2	3:152226709-152259156	1977	0.049492	6.01424

## Sheet: DEIs with annotated genes
The novel differentially expressed transcripts (P < 0.05, |FC| > 2) length associated with annotated genes identified in blood in CT vs. H120.
Gene ID	Gene name	Position	Transcript length (bp*)	P-value	FC
ENSRNOG00000032844.4	RT1-Da	20:4127639-4132618	1198	7.09485e-09	-115.881
ENSRNOG00000048651.1	Nrtn	9:10300282-10306597	1041	2.44668e-07	13.0059
ENSRNOG00000034254.4	Actb	12:13715787-13719428	1934	1.56098e-06	9.71825
ENSRNOG00000020246.7	Myl9	3:152857557-152863968	1146	1.6043e-05	101.472
ENSRNOG00000016952.5	Uqcr11	7:12171163-12175835	529	1.69756e-05	-40.4317
ENSRNOG00000028411.6	Pcnp	11:47055767-47064129	407	2.08743e-05	56.7584
ENSRNOG00000011955.4	AABR07026997.1	17:9233437-9234882	536	9.3053e-05	48.9726
ENSRNOG00000000529.5	Pim1	20:8165016-8166359	1056	0.000239255	24.3597
ENSRNOG00000050210.2	RT1-CE10	20:156671-157533	681	0.000324343	3.75355
ENSRNOG00000027990.4	Crip1	6:137964648-137967044	1002	0.000514983	-4.43739
ENSRNOG00000015753.6	Epn1	1:72294151-72299401	1307	0.000720604	13.4538
ENSRNOG00000014288.8	Fn1	9:78900018-78901554	991	0.000753165	-22.2579
ENSRNOG00000007784.7	Bloc1s1	7:3342628-3346248	559	0.00109711	-38.4828
ENSRNOG00000047098.2	Hbb-bs	1:168957718-168958842	487	0.00119319	4.17247
ENSRNOG00000002946.3	Socs3	10:106973872-106977009	2576	0.00124087	6.24961
ENSRNOG00000020849.5	Hcst	1:88879427-88881508	471	0.0013665	-6.24405
ENSRNOG00000019838.6	Gmfg	1:85312479-85317968	615	0.0015281	-2.20137
ENSRNOG00000054017.1	LOC100912564	17:44522036-44522475	439	0.0018338	4.12175
ENSRNOG00000032844.4	RT1-Da	20:4127639-4132618	1183	0.00191357	-7.25924
ENSRNOG00000002572.5	Cacybp	13:77948770-77959133	1570	0.00204739	8.36626
ENSRNOG00000000571.6	Psap	20:29854904-29856877	1052	0.00208804	-4.71101
ENSRNOG00000049931.2	LOC288913	19:25355814-25358613	679	0.00225973	-29.149
ENSRNOG00000037402.2	Cops9	9:99813325-99818268	498	0.00231036	-51.2473
ENSRNOG00000010807.5	Cox6c	7:74723178-74735653	451	0.00231217	-57.3444
ENSRNOG00000014205.2	Klf2	16:19222381-19225057	1781	0.00258941	-4.96689
ENSRNOG00000013009.2	Ldha	1:102908462-102909711	791	0.00266873	-6.54455
ENSRNOG00000001420.8	Fis1	12:22750483-22754602	794	0.00267353	4.63927
ENSRNOG00000009094.4	Nudt4	7:36648501-36660342	526	0.0027727	5.62039
ENSRNOG00000010415.8	Atxn7l1	6:52674285-52677316	707	0.00322459	10.5338
ENSRNOG00000039980.4	Slc25a5	X:123404508-123407646	1270	0.00370665	-36.626
ENSRNOG00000000917.4	Nupr2	12:30300936-30304081	605	0.00386423	32.1807
ENSRNOG00000015857.6	Ctsa	3:161299795-161304880	1742	0.00473104	-7.79121
ENSRNOG00000011054.6	Laptm5	5:149047472-149066376	920	0.00513607	32.232
ENSRNOG00000000853.7	Aif1	20:5161332-5163249	674	0.00523174	-6.56406
ENSRNOG00000050210.2	RT1-CE10	20:153927-154549	622	0.0053938	-2.70189
ENSRNOG00000018487.3	Slc3a2	1:224906553-224912656	1887	0.00542297	14.5121
ENSRNOG00000026643.5	Chordc1	8:17421451-17435487	682	0.00594946	25.5826
ENSRNOG00000017941.8	Optn	17:77167691-77217470	3178	0.00605963	9.10055
ENSRNOG00000000562.6	Prf1	20:30915212-30921379	2599	0.00640896	4.11181
ENSRNOG00000050655.1	P4ha1	20:28969872-28972557	1109	0.00667171	7.90577
ENSRNOG00000013862.5	Dusp2	3:119776809-119779147	1786	0.00706226	8.89696
ENSRNOG00000036674.4	Cd7	10:110229921-110232850	1021	0.00715263	-27.0981
ENSRNOG00000002632.8	Naca	7:2458263-2470734	928	0.00936738	-2.22296
ENSRNOG00000031090.6	RT1-CE7	20:4920762-4921365	400	0.00961082	3.03357
ENSRNOG00000015232.7	Pip5k1b	1:242440807-242441307	500	0.00965362	10.4291
ENSRNOG00000000851.8	Bag6	20:5125348-5138084	3895	0.00984276	4.26595
ENSRNOG00000014078.7	Ndufb8	1:264298658-264303796	749	0.00987686	-3.61476
ENSRNOG00000020994.6	Slc25a39	10:90355132-90356324	335	0.010245	8.02303
ENSRNOG00000020363.6	Med25	1:100874975-100887939	2410	0.0106253	6.5965
ENSRNOG00000017354.6	Zyx	4:71741847-71749386	1985	0.0110821	-3.69077
ENSRNOG00000029886.3	Hba-a1	10:15602792-15603408	616	0.0112003	4.7552
ENSRNOG00000011557.3	S100a8	2:190073167-190074354	552	0.0112983	-3.40824
ENSRNOG00000017941.8	Optn	17:77167691-77201266	1611	0.0113052	26.2884
ENSRNOG00000017941.8	Optn	17:77167691-77197107	1296	0.0113781	11.1931
ENSRNOG00000016387.8	Rpl34	2:235852645-235854019	288	0.0114865	4.31943
ENSRNOG00000021062.5	Fxyd5	1:89464851-89473675	897	0.011585	-7.18885
ENSRNOG00000014405.7	Aprt	19:55387052-55389307	829	0.0127353	-2.66441
ENSRNOG00000011279.5	Cmc2	19:49433326-49457415	628	0.0130053	28.2865
ENSRNOG00000060629.1	LOC103694855	AABR07024041.1:23528-30742	499	0.0141136	2.67209
ENSRNOG00000000723.7	RT1-CE5	20:4896271-4897014	390	0.0145803	7.18151
ENSRNOG00000008061.6	Nuak1	7:25039026-25042297	868	0.0148987	17.0355
ENSRNOG00000049560.2	Glul	13:71330990-71340229	2546	0.015684	3.12245
ENSRNOG00000015496.6	Tpm4	16:19384589-19389652	1538	0.0161027	-6.61818
ENSRNOG00000012557.4	Lgals5	10:66227779-66229501	791	0.0165601	4.00315
ENSRNOG00000047098.2	Hbb-bs	1:168945818-168958842	497	0.0167922	3.33897
ENSRNOG00000000529.5	Pim1	20:8164947-8170035	2138	0.0170486	4.83249
ENSRNOG00000027767.5	Slc38a5	X:14963916-14972280	2024	0.01809	3.29166
ENSRNOG00000017359.5	Itm2c	9:92916338-92930307	2079	0.0182936	-9.13947
ENSRNOG00000033378.5	Rnf123	8:116829049-116848549	3932	0.0196416	10.6773
ENSRNOG00000047321.2	Hba-a2	10:15587961-15590220	2144	0.0196855	2.88738
ENSRNOG00000015703.6	Hypk	3:113423681-113424632	322	0.0199517	7.34265
ENSRNOG00000042628.2	Tmem273	16:9023386-9054669	1361	0.0203608	4.21313
ENSRNOG00000034078.6	Mxi1	1:274049540-274067093	418	0.0205442	21.5723
ENSRNOG00000050585.2	Pgam1	1:261158251-261165809	1752	0.0208105	-21.8151
ENSRNOG00000009642.3	Cct4	14:107767390-107780295	2136	0.0208436	26.4638
ENSRNOG00000017074.7	Rab28	14:73889176-73963216	1641	0.0211761	-19.6889
ENSRNOG00000019768.7	Ncoa4	16:8309231-8323363	3446	0.0212166	23.1687
ENSRNOG00000017117.7	Ybx2	10:56546545-56552715	2074	0.0214669	3.9538
ENSRNOG00000052802.1	Aldoa	1:198228384-198229348	742	0.0215217	-17.9126
ENSRNOG00000013668.4	Capg	4:100407657-100419505	1535	0.0216364	-19.2255
ENSRNOG00000001420.8	Fis1	12:22750484-22751224	509	0.0225141	3.9611
ENSRNOG00000005809.7	Arhgdib	4:170913916-170914819	903	0.0229382	-3.53843
ENSRNOG00000027767.5	Slc38a5	X:14963916-14972281	2025	0.0238597	3.4987
ENSRNOG00000020349.3	Rab3il1	1:226063494-226085934	2483	0.0240677	3.39188
ENSRNOG00000010037.8	Epb41	5:150081720-150133727	3626	0.0241235	15.883
ENSRNOG00000057153.1	Pla1a	11:64882287-64919718	1867	0.0256489	15.0265
ENSRNOG00000029886.3	Hba-a1	10:15602792-15603408	213	0.0261153	2.2309
ENSRNOG00000020427.7	Borcs8	16:21021891-21029175	1248	0.0263198	21.7678
ENSRNOG00000015753.6	Epn1	1:72294151-72311968	2180	0.0264835	2.96749
ENSRNOG00000012957.7	Sh3glb1	2:250733759-250744248	717	0.0267844	29.68
ENSRNOG00000010420.3	Sem1	4:32067443-32087617	770	0.0268042	4.35162
ENSRNOG00000049912.2	Atp5f1e	3:172563104-172566036	401	0.0277961	13.1028
ENSRNOG00000012183.5	Glrx	2:2605975-2615947	1305	0.0285427	-6.36794
ENSRNOG00000021681.6	Eea1	7:37043342-37047406	683	0.030342	-3.71249
ENSRNOG00000059900.1	Bst2	16:19941208-19942392	469	0.0305918	3.88305
ENSRNOG00000037580.2	Psmd8	1:88116804-88123624	1507	0.0307225	2.25325
ENSRNOG00000014205.2	Klf2	16:19222381-19225049	2101	0.0307411	17.0425
ENSRNOG00000001172.7	Rnf10	12:47128470-47138128	2694	0.0310556	-21.0593
ENSRNOG00000000529.5	Pim1	20:8165016-8170031	2065	0.0310643	2.26509
ENSRNOG00000019374.6	Csk	8:62405605-62425125	3252	0.0311855	4.46973
ENSRNOG00000007539.7	Rsad2	6:45655944-45669194	3721	0.031214	-4.23116
ENSRNOG00000000655.8	Ptprc	13:55060896-55075505	3049	0.0322313	-22.7149
ENSRNOG00000006911.7	Sptb	6:99673607-99703221	7247	0.032288	3.83335
ENSRNOG00000032708.5	RT1-Bb	20:4043720-4048690	2281	0.0325967	-5.89602
ENSRNOG00000015753.6	Epn1	1:72294151-72308830	2014	0.032654	2.68377
ENSRNOG00000020845.6	Tyrobp	1:88875365-88879308	617	0.0327487	-3.96828
ENSRNOG00000050210.2	RT1-CE10	20:153925-154551	626	0.0329102	19.1201
ENSRNOG00000014289.7	Arpc2	9:81545720-81548866	537	0.0334062	-24.0141
ENSRNOG00000021201.7	Txnip	2:198683087-198686974	2828	0.0335479	2.15393
ENSRNOG00000018653.5	Pfdn1	18:29233986-29290450	1103	0.0337196	-4.3881
ENSRNOG00000011352.2	Furin	1:142185090-142198312	4296	0.0342648	9.2321
ENSRNOG00000008941.8	Ets1	8:33875809-33879617	3808	0.0344986	-14.2805
ENSRNOG00000020626.7	Snrnp25	10:15686000-15689325	774	0.034601	-4.3579
ENSRNOG00000032596.2	RT1-T24-1	20:3249660-3252255	1721	0.034926	3.0663
ENSRNOG00000020363.6	Med25	1:100874975-100887939	2338	0.0352168	2.456
ENSRNOG00000008288.4	Akirin2	5:50001962-50016806	1981	0.0359942	18.8403
ENSRNOG00000021201.7	Txnip	2:198683086-198686974	2829	0.037042	2.52724
ENSRNOG00000003980.5	Ttc1	10:29342494-29367882	1452	0.0373808	-15.6184
ENSRNOG00000010363.6	Mrps23	10:75528960-75536767	1342	0.0378486	-15.5557
ENSRNOG00000017751.8	Arl6ip1	1:187770158-187779683	2125	0.0382854	-14.2348
ENSRNOG00000004526.7	Cox7a2l	6:6695805-6709805	1094	0.038311	7.56014
ENSRNOG00000010319.6	Lcp1	15:57246793-57277813	3140	0.0388279	3.23128
ENSRNOG00000015945.6	Cd3g	8:49278148-49281080	547	0.0398957	13.573
ENSRNOG00000019506.7	Dnajb2	9:82436660-82444674	3030	0.0399868	2.60121
ENSRNOG00000008015.5	Fos	6:109301342-109304202	2342	0.0408819	-19.246
ENSRNOG00000011140.6	Prxl2a	16:17499956-17513870	1631	0.0409363	6.87386
ENSRNOG00000012722.5	Ppdpf	3:176691036-176692287	750	0.0412261	-2.51945
ENSRNOG00000050000.2	AABR07034739.1	11:86090869-86092920	687	0.0418811	-2.3026
ENSRNOG00000051624.1	Hspe1	9:61691277-61694599	509	0.0433015	4.50977
ENSRNOG00000015957.6	F13a1	17:28504181-28506811	938	0.0434564	18.8727
ENSRNOG00000007971.6	Wbp2	10:104629557-104637983	1968	0.0436852	18.3999
ENSRNOG00000022071.7	Itga2b	10:90397956-90415640	3859	0.0444403	2.42441
ENSRNOG00000002188.7	Hpse	14:10534318-10559023	881	0.0455743	3.62857
ENSRNOG00000000851.8	Bag6	20:5125309-5138084	3934	0.0476216	20.2873
ENSRNOG00000002001.8	Itsn1	11:31976073-32013506	2281	0.0485258	4.16527
ENSRNOG00000017036.3	Sec11c	18:61490026-61506508	816	0.0495504	-21.5316
