# Supplementary material for: Identification of Novel Mrna Isoforms Associated with Acute Heat Stress Response Using RNA-Sequencing Data in The Sprague-Dawley Rats
Source: Preprints.org preprint supplement (doi:10.20944/preprints202211.0380.v1), 2022-11-21
Supplement: Supplementary file 3 [file Table S3_Liver_known transcripts.xlsx]

## Sheet: Title
Table S3. The known differentially expressed mRNA isoforms (P < 0.001, FDR < 0.05 and |FC| > 2) identified in liver under various heat stress conditions.

## Sheet: CT vs. H30
The known differentially expressed mRNA isoforms (P < 0.001, FDR < 0.05 and |FC| > 2) identified in liver in CT vs. H30.
Transcript ID	Transcript Name	Position	Transcript length (bp*)	P-value	FC	FDR
ENSRNOT00000074685	Dbi-202	13:36147667-36156076	565	9.84296e-92	-6671.54	8.37331e-87
ENSRNOT00000026528	Rps5-201	1:65660469-65664767	765	7.15151e-54	-340.274	3.04186e-49
ENSRNOT00000000673	Ppa1-201	20:31298268-31310674	2625	1.35962e-32	-238.893	1.92769e-28
ENSRNOT00000088049	Scp2-203	5:127648554-127735739	2052	3.55126e-31	-24.255	4.31575e-27
ENSRNOT00000071153	Prkar1a-201	10:97940704-97957336	1434	8.51369e-31	-52.077	9.05313e-27
ENSRNOT00000037043	LOC100362366-201	3:24600602-24601063	461	2.69891e-29	-8.6527	2.29593e-25
ENSRNOT00000005346	Pfdn2-201	13:89725868-89743848	1667	3.03351e-28	230.939	2.34598e-24
ENSRNOT00000044582	Mt-nd4l-201	MT:9869-10166	297	1.20836e-27	8.20943	8.56619e-24
ENSRNOT00000012240	Sec62-201	2:116189861-116219750	1818	5.06818e-27	-344.484	2.8743e-23
ENSRNOT00000016751	Uqcrh-201	5:134919043-134927235	547	1.6032e-22	585.208	6.49439e-19
ENSRNOT00000001383	Tpt1-201	15:57891679-57894504	793	6.08316e-22	2.13677	2.24995e-18
ENSRNOT00000005014	Prdx4-201	X:43497762-43512991	907	1.95196e-21	22.9446	6.91879e-18
ENSRNOT00000068078	Sat1-201	X:43626479-43629765	1164	2.77928e-20	-250.575	8.15277e-17
ENSRNOT00000022047	Sumo1-201	9:66453437-66483614	1116	3.17345e-19	127.821	8.70846e-16
ENSRNOT00000044975	Tapbp-201	20:5468077-5476193	1727	3.36957e-19	-147.524	8.95768e-16
ENSRNOT00000028546	Dbp-201	1:101687854-101692846	1702	1.22567e-18	-34.9789	3.06667e-15
ENSRNOT00000079796	Dpt-204	13:83073548-83102397	1720	3.48562e-17	-3.49215	6.44604e-14
ENSRNOT00000048767	Mt-nd5-201	MT:11735-13565	1830	4.5763e-17	4.20282	8.283e-14
ENSRNOT00000003412	Litaf-201	10:4719712-4763510	2238	4.89025e-17	7.43933	8.66684e-14
ENSRNOT00000024678	Rps15a-201	1:187759900-187765744	393	5.4212e-17	502.318	9.41176e-14
ENSRNOT00000020635	Rpl13-201	19:55917735-55919996	636	7.9007e-17	3.2443	1.34421e-13
ENSRNOT00000090272	Rnase4-202	15:28023017-28034590	539	2.32394e-16	308.136	3.66102e-13
ENSRNOT00000085279	Ephx1-202	13:99271365-99300579	1755	2.58055e-16	-2.35255	3.99137e-13
ENSRNOT00000079231	Pgrmc1-202	X:123205890-123212727	666	3.12007e-16	-376.991	4.73967e-13
ENSRNOT00000045628	Tf-202	8:111694565-111721303	2324	1.9984e-15	-2.00274	2.74197e-12
ENSRNOT00000078929	Cetn2-201	X:152927717-152932953	1276	3.18653e-14	-11.7718	3.8725e-11
ENSRNOT00000086505	Aldob-202	5:64805772-64818824	1542	3.85248e-14	-9.96561	4.61587e-11
ENSRNOT00000015190	Mat1a-201	16:18690648-18709133	3023	4.00239e-14	-7.54432	4.72888e-11
ENSRNOT00000074225	Syngr2-201	10:106812738-106816675	946	4.63346e-14	-17.5895	5.32654e-11
ENSRNOT00000005837	Phf5a-201	7:123095287-123101869	873	5.38511e-14	119.83	6.02771e-11
ENSRNOT00000009621	Churc1-201	6:99817430-99831576	471	7.08993e-14	-3.59678	7.73248e-11
ENSRNOT00000092476	Rps18-204	20:5441875-5445550	544	8.32667e-14	-2.3456	8.85427e-11
ENSRNOT00000079631	Hpn-203	1:89534415-89543967	1251	8.54406e-14	-9.25755	8.97327e-11
ENSRNOT00000022824	Chka-201	1:219077770-219126220	2530	1.6746e-13	6.08102	1.69592e-10
ENSRNOT00000028485	Tm7sf2-201	1:221425986-221431713	2273	2.12566e-13	-2.52307	2.12739e-10
ENSRNOT00000031796	Cdk4-201	7:70349862-70352418	912	2.73949e-13	-9.75554	2.64825e-10
ENSRNOT00000000200	Tmprss6-201	7:119659323-119689938	2999	3.43246e-13	-5.98837	3.2444e-10
ENSRNOT00000003020	Stbd1-201	14:16976355-16979760	1933	4.05722e-13	-2.89118	3.75156e-10
ENSRNOT00000028988	LOC100912599-201	1:31264754-31273159	486	5.02389e-13	-3.11187	4.49871e-10
ENSRNOT00000012141	Pdrg1-201	3:148487058-148493225	1192	5.98892e-13	75.0122	5.25228e-10
ENSRNOT00000021725	Rpl12-201	3:12009577-12011666	586	6.75006e-13	2.50871	5.8594e-10
ENSRNOT00000012372	Chchd1-201	15:4025462-4026637	553	1.4702e-12	-148.734	1.15804e-09
ENSRNOT00000023289	Rsrp1-201	5:153260929-153264669	1515	3.20936e-12	2.6584	2.39489e-09
ENSRNOT00000057158	AABR07071891.1-201	1:84573495-84573959	464	4.09236e-12	-3.83018	3.00115e-09
ENSRNOT00000034583	Prdx6-201	13:79077032-79088127	1404	4.30132e-12	-2.50967	3.10092e-09
ENSRNOT00000016076	Npc2-201	6:108467409-108488330	1256	6.59525e-12	-2.17673	4.59878e-09
ENSRNOT00000007371	Apob-201	6:33176825-33216378	14073	8.04562e-12	9.02131	5.43201e-09
ENSRNOT00000064013	Acss2-201	3:151032951-151075856	2867	1.02269e-11	-10.7292	6.74414e-09
ENSRNOT00000020335	Ptgr1-201	5:76110737-76129441	1232	1.04733e-11	-2.37107	6.85351e-09
ENSRNOT00000071603	Selenbp1-201	2:195416468-195423787	1749	1.39779e-11	-2.62907	8.94049e-09
ENSRNOT00000016499	S100a16-201	2:189922995-189928848	1155	1.58163e-11	-18.1779	9.96647e-09
ENSRNOT00000012725	Tf-201	8:111673546-111721333	2978	1.76719e-11	-4.02423	1.10539e-08
ENSRNOT00000033408	Acat2-201	1:47972398-47992653	2027	1.95852e-11	-5.16176	1.21519e-08
ENSRNOT00000005577	LOC108352650-201	6:91455332-91456696	305	1.97129e-11	-4.73861	1.21519e-08
ENSRNOT00000040993	Mt-nd2-201	MT:3903-4942	1039	2.17523e-11	4.13156	1.32879e-08
ENSRNOT00000082582	Gas2-202	1:107344903-107363607	1557	2.31456e-11	10.9155	1.3769e-08
ENSRNOT00000000101	Rfxapl1-201	2:144213402-144217600	1653	2.49138e-11	73.0188	1.46165e-08
ENSRNOT00000085120	Cxxc5-202	18:28653591-28656937	2155	3.25978e-11	11.6125	1.88643e-08
ENSRNOT00000016954	Cpt2-201	5:127505613-127523089	2401	3.39688e-11	-3.91511	1.93939e-08
ENSRNOT00000067032	Rpl3-201	7:121297354-121302740	1298	3.94299e-11	-9.58623	2.20675e-08
ENSRNOT00000079494	RT1-CE10-202	20:154073-157677	1547	4.37976e-11	-4.86592	2.43517e-08
ENSRNOT00000078203	AABR07034632.1-201	11:81707803-81735592	1702	4.84099e-11	-5.03585	2.67414e-08
ENSRNOT00000073233	Gde1-201	1:188394813-188407132	1385	4.98501e-11	-5.37036	2.73593e-08
ENSRNOT00000015756	Rpl22l1-201	2:115362798-115364729	560	5.49703e-11	-5.29808	2.99761e-08
ENSRNOT00000014153	Igfbp4-201	10:86950556-86962578	2176	6.09579e-11	-2.15706	3.30295e-08
ENSRNOT00000022000	Pdlim1-201	1:259308295-259357056	1471	7.39433e-11	-3.3281	3.85907e-08
ENSRNOT00000007870	Hsd11b1-201	13:111946629-111972603	1529	8.85006e-11	-59.3881	4.50818e-08
ENSRNOT00000034843	Tsku-201	1:163317281-163328591	2573	1.1579e-10	-5.55802	5.72684e-08
ENSRNOT00000083601	Gcgr-202	10:109708754-109716128	1865	1.20323e-10	-6.51055	5.88262e-08
ENSRNOT00000093034	Grhpr-204	5:60529086-60538188	1119	1.22407e-10	-7.11566	5.95032e-08
ENSRNOT00000092818	Grhpr-202	5:60529092-60535129	725	1.2333e-10	-8.81884	5.96111e-08
ENSRNOT00000083682	Adh6-202	2:243550638-243561757	1336	1.26192e-10	-2.70983	6.06498e-08
ENSRNOT00000028196	Cyp2b2-201	1:83103924-83119193	1476	1.29143e-10	-11.0339	6.14322e-08
ENSRNOT00000075493	Fabp5-201	2:93981655-93985378	723	1.29284e-10	-5.32508	6.14322e-08
ENSRNOT00000015451	Ces2a-201	19:59196-64303	1230	1.29986e-10	-8.0612	6.14322e-08
ENSRNOT00000022437	Eif3j-201	3:113976686-113998922	1811	1.44707e-10	-3.78291	6.72682e-08
ENSRNOT00000032015	Ifi27l2b-201	6:127336304-127337791	451	1.58572e-10	-3.19044	7.29165e-08
ENSRNOT00000090858	Zc3h11a-201	13:50196041-50234862	2691	1.67613e-10	4.55175	7.62494e-08
ENSRNOT00000052270	RT1-A2-202	20:5374984-5378539	1589	1.78929e-10	-3.14375	8.01688e-08
ENSRNOT00000014810	Bet1-201	4:29082364-29092753	1516	2.00458e-10	-83.2169	8.83564e-08
ENSRNOT00000067843	LOC103691744-201	2:264266983-264293046	1813	2.03399e-10	3.50274	8.91903e-08
ENSRNOT00000071424	LOC100911516-202	9:101106891-101107575	684	2.42548e-10	6.82535	1.05272e-07
ENSRNOT00000028557	Grn-201	10:90376932-90383205	2335	2.5336e-10	-7.77103	1.08307e-07
ENSRNOT00000072206	LOC679739-201	1:32573227-32581781	486	2.54932e-10	-3.04499	1.08434e-07
ENSRNOT00000021550	Id4-201	17:16692556-16695126	1626	2.62921e-10	4.88963	1.10725e-07
ENSRNOT00000079516	Tas1r2-202	5:158090237-158115725	3138	3.1014e-10	-8.59546	1.2933e-07
ENSRNOT00000089389	Slc66a2-201	18:76770011-76805766	1863	3.98883e-10	-3.65921	1.65525e-07
ENSRNOT00000088205	Rasl10b-201	KL568414.1:23533-32066	2513	4.06114e-10	-5.135	1.67707e-07
ENSRNOT00000019556	Fam32a-201	16:19304528-19308842	1996	4.57314e-10	11.2704	1.87938e-07
ENSRNOT00000015678	C1rl-201	4:157107468-157123446	2327	4.97554e-10	-61.987	2.02519e-07
ENSRNOT00000012279	Dynll2-201	10:75262536-75270561	2323	5.3187e-10	-2.28544	2.12874e-07
ENSRNOT00000071719	Cdk5rap3-201	10:84780607-84789832	1934	5.55715e-10	-5.28591	2.17853e-07
ENSRNOT00000001049	Abcf1-201	20:3309898-3322825	3137	5.77144e-10	-6.90578	2.25216e-07
ENSRNOT00000073709	LOC100909524-201	6:127500015-127508452	1596	5.80759e-10	-7.63112	2.25592e-07
ENSRNOT00000047540	Cyp2b2-202	1:83103924-83119190	1500	5.83725e-10	-13.4585	2.25713e-07
ENSRNOT00000009187	Slc38a4-201	7:138461602-138512952	1915	6.25637e-10	-34.235	2.3974e-07
ENSRNOT00000015316	Inmt-201	4:85381888-85386231	1108	6.50172e-10	-153.886	2.45613e-07
ENSRNOT00000025052	Aars-201	19:43193263-43215281	3363	6.65325e-10	-5.214	2.49333e-07
ENSRNOT00000086530	Pex16-203	3:81287241-81292573	1221	7.63893e-10	-3.08728	2.80102e-07
ENSRNOT00000072795	AABR07073045.1-201	4:120413652-120414118	466	8.25529e-10	-9.07046	2.99868e-07
ENSRNOT00000026718	Ctsf-201	1:220114227-220119976	1863	9.15892e-10	-3.84233	3.2737e-07
ENSRNOT00000004385	Qdpr-201	14:70164649-70178284	1330	1.04302e-09	-3.96003	3.69703e-07
ENSRNOT00000074362	Dcxr-201	10:109907758-109909646	850	1.38245e-09	-2.34387	4.70416e-07
ENSRNOT00000071574	Echs1-201	1:141821915-141830764	1483	1.57014e-09	-9.79123	5.3004e-07
ENSRNOT00000074075	Mpnd-201	9:11055370-11061611	1545	1.94429e-09	-2.34446	6.41079e-07
ENSRNOT00000086293	LOC103690108-202	20:3791839-3794027	847	2.09673e-09	-5.14221	6.88676e-07
ENSRNOT00000029127	Agxt-201	9:100281338-100291291	1599	2.23662e-09	-141.961	7.23449e-07
ENSRNOT00000005370	Pfn1-201	10:57273004-57275708	816	2.8745e-09	-2.0144	9.15846e-07
ENSRNOT00000084685	LOC299282-207	6:128048098-128080889	2247	3.03508e-09	-5.08361	9.58488e-07
ENSRNOT00000047439	RT1-T24-4-201	20:3189472-3197457	1638	3.04214e-09	-2.4965	9.58488e-07
ENSRNOT00000091597	Dbp-202	1:101687895-101692845	1249	3.33577e-09	-8.92345	1.04712e-06
ENSRNOT00000077756	Fkbp8-201	16:20645956-20652889	1651	3.36852e-09	-2.12051	1.05352e-06
ENSRNOT00000018221	Cpn1-201	1:263733518-263762785	2149	3.44268e-09	-3.40088	1.07277e-06
ENSRNOT00000081484	Mat1a-202	16:18690245-18709121	3334	4.35949e-09	-5.50662	1.33884e-06
ENSRNOT00000086633	Sdc1-201	6:33885494-33908016	3067	4.75305e-09	-5.78565	1.45445e-06
ENSRNOT00000004653	Atp6v0e1-201	10:16769665-16792909	1005	4.81655e-09	-2.6854	1.46335e-06
ENSRNOT00000032613	Gpi-201	1:90063410-90091287	2014	5.61748e-09	-6.67171	1.68265e-06
ENSRNOT00000043610	AC099453.1-201	5:78392714-78393143	429	5.69014e-09	-5.78022	1.69844e-06
ENSRNOT00000018343	Gclm-201	2:225827503-225847874	1486	5.85214e-09	-8.26087	1.73462e-06
ENSRNOT00000075280	Cldn3-201	12:21831341-21832813	1472	5.99422e-09	-2.90523	1.77056e-06
ENSRNOT00000066109	Aldh3a2-201	10:47525492-47546037	2977	6.85623e-09	-7.57332	2.01121e-06
ENSRNOT00000021155	Dhrs3-201	5:162808645-162843383	2079	7.87143e-09	-6.65451	2.2932e-06
ENSRNOT00000087415	Atg101-202	7:142929399-142938554	1257	7.90568e-09	-61.6839	2.29532e-06
ENSRNOT00000071965	Pgam1-201	1:261158260-261165808	1742	8.01683e-09	-2.9684	2.31181e-06
ENSRNOT00000060514	Hnrnpc-201	15:28487049-28517335	1279	8.98898e-09	-2.98823	2.55747e-06
ENSRNOT00000086027	LOC103689965-202	20:4302346-4508197	5356	9.05253e-09	-3.67555	2.56697e-06
ENSRNOT00000048529	Tnfrsf1a-201	4:157864968-157877633	2136	9.30942e-09	-4.08447	2.62233e-06
ENSRNOT00000022495	Phpt1-201	3:2796996-2798470	635	9.49917e-09	-2.03431	2.66695e-06
ENSRNOT00000091249	RGD1565355-210	4:14039976-14241269	2595	9.7365e-09	-55.8144	2.71565e-06
ENSRNOT00000044275	Bsg-202	7:12875536-12882753	1315	1.08153e-08	-2.55958	2.96788e-06
ENSRNOT00000081958	Dnajb2-202	9:82436515-82444668	1820	1.16116e-08	-3.26263	3.166e-06
ENSRNOT00000083354	Kmt2d-202	7:140489504-140506925	1583	1.21689e-08	-6.69918	3.28635e-06
ENSRNOT00000012883	Sqle-201	7:99609190-99624732	2726	1.24163e-08	-5.47891	3.34254e-06
ENSRNOT00000013600	Brk1-201	4:145559205-145574438	1102	1.28763e-08	-2.25238	3.44495e-06
ENSRNOT00000009462	Adhfe1-201	5:9403195-9429859	1970	1.28777e-08	-6.10315	3.44495e-06
ENSRNOT00000027459	Asrgl1-201	1:225309245-225329770	1634	1.33454e-08	-51.2218	3.54774e-06
ENSRNOT00000018167	Pex14-201	5:165782894-165918445	1903	1.35811e-08	-4.83783	3.59916e-06
ENSRNOT00000027223	As3mt-201	1:266482857-266514569	1607	1.36711e-08	-2.26874	3.61175e-06
ENSRNOT00000051693	AC141489.1-201	5:159606646-159606989	343	1.50717e-08	-2.31484	3.94502e-06
ENSRNOT00000002072	Pdk1-201	3:58530869-58558027	1579	1.73008e-08	-9.54855	4.43301e-06
ENSRNOT00000085966	Aldh1l1-202	4:123516787-123557501	2709	1.8651e-08	-7.44797	4.73618e-06
ENSRNOT00000049448	LOC100911766-201	1:214454089-214473741	1410	1.93944e-08	-2.92537	4.89573e-06
ENSRNOT00000007623	Arl1-201	7:29282304-29293399	943	1.95182e-08	-66.2297	4.91242e-06
ENSRNOT00000010481	Tram1-201	5:5215195-5297336	2754	2.03337e-08	-6.25466	5.08755e-06
ENSRNOT00000081355	Tuba1b-201	7:140614751-140617721	1608	2.05946e-08	-4.89124	5.13772e-06
ENSRNOT00000009402	Dhcr24-201	5:126164673-126191206	3865	2.10992e-08	-5.78036	5.24821e-06
ENSRNOT00000058190	Ndufc1-201	2:140462899-140464607	384	2.27413e-08	-42.8641	5.60748e-06
ENSRNOT00000083500	LOC501233-206	19:15094308-15334886	1676	2.47708e-08	-20.2339	6.0035e-06
ENSRNOT00000017911	Arg1-201	1:21525420-21537863	1498	2.54102e-08	-2.27401	6.12358e-06
ENSRNOT00000009870	Maged1-201	X:63803188-63809861	2822	2.63392e-08	-7.62388	6.29395e-06
ENSRNOT00000083293	Copb1-201	1:183695480-183729569	3332	2.70056e-08	-4.98443	6.41715e-06
ENSRNOT00000013912	Cgrrf1-201	15:23619122-23639628	1323	2.7916e-08	-2.68535	6.57834e-06
ENSRNOT00000010762	Bcl2l1-201	3:148259595-148313810	2368	2.97101e-08	-6.13856	6.98179e-06
ENSRNOT00000013423	Akr1b7-201	4:61850347-61862526	1415	3.58342e-08	2.55628	8.21666e-06
ENSRNOT00000045156	LOC100360841-201	9:69790830-69791196	366	3.70976e-08	-3.67731	8.46074e-06
ENSRNOT00000044520	AABR07044383.1-201	20:3791839-3796275	813	3.78731e-08	-5.90266	8.61451e-06
ENSRNOT00000036993	Adh6-201	2:243656578-243687857	1854	3.81548e-08	2.89799	8.65544e-06
ENSRNOT00000022573	Dnaja2-201	19:22569998-22588137	1838	4.05874e-08	-3.55077	9.11423e-06
ENSRNOT00000015632	Macroh2a1-201	17:9289188-9344188	1171	4.06058e-08	-4.77088	9.11423e-06
ENSRNOT00000024677	Gas6-201	16:81213363-81243757	2538	4.43714e-08	-7.1943	9.88123e-06
ENSRNOT00000015320	Stard5-201	1:145770134-145780001	1202	4.52905e-08	-5.85772	1.00596e-05
ENSRNOT00000009333	Ly6e-201	7:116356168-116359862	1263	5.10406e-08	-27.703	1.12196e-05
ENSRNOT00000093172	Mtch1-203	20:6937960-6960481	810	5.34972e-08	-4.27633	1.17293e-05
ENSRNOT00000092949	AC134224.3-201	1:221158097-221158792	695	5.68449e-08	-9.42342	1.23676e-05
ENSRNOT00000074644	Larp7-202	2:231873141-231881939	1437	5.72078e-08	-4.2638	1.24148e-05
ENSRNOT00000013175	Serpina3m-201	6:127808784-127816055	1692	6.17381e-08	-3.24502	1.32292e-05
ENSRNOT00000086232	Alas1-202	8:114927788-114940177	1969	6.79066e-08	-2.41256	1.45144e-05
ENSRNOT00000091288	Ndufa3-201	1:64172539-64175099	276	7.01292e-08	-2.07334	1.48404e-05
ENSRNOT00000014127	Hmbs-201	8:48667274-48674748	1642	7.18797e-08	-3.21422	1.5173e-05
ENSRNOT00000026575	Slc27a5-201	1:65576534-65587186	2318	7.31074e-08	-2.26246	1.5394e-05
ENSRNOT00000058422	AABR07034632.1-202	11:81711627-81717521	1059	7.39997e-08	-2.95753	1.55434e-05
ENSRNOT00000076924	Etnk2-203	13:50481162-50499140	2199	7.50766e-08	-2.99352	1.57308e-05
ENSRNOT00000082538	RT1-A1-205	20:5351620-5421098	1463	7.83643e-08	-6.6128	1.63793e-05
ENSRNOT00000035048	LOC100912618-201	3:164343832-164366684	1750	7.9226e-08	-2.12572	1.64784e-05
ENSRNOT00000020749	Spr-201	4:116912350-116916236	1357	8.28263e-08	-2.05627	1.70081e-05
ENSRNOT00000013994	Mcat-201	7:124412761-124423832	1900	8.73288e-08	-5.95721	1.78581e-05
ENSRNOT00000006570	Rtcb-201	7:23913829-23933191	1876	8.78061e-08	-3.93453	1.79127e-05
ENSRNOT00000020676	Atp5mc2-201	7:144264213-144272578	617	9.01622e-08	-2.26578	1.83055e-05
ENSRNOT00000084069	Ndufa8-202	3:15362823-15379381	870	9.04084e-08	-2.15939	1.83118e-05
ENSRNOT00000010253	Chmp3-201	4:99449110-99494423	836	9.38297e-08	-5.83287	1.89147e-05
ENSRNOT00000021081	Ghr-201	2:53159872-53413638	941	9.44472e-08	-2.64582	1.89941e-05
ENSRNOT00000007276	Zc3h15-201	3:71020533-71040157	2011	9.5387e-08	-2.92457	1.91379e-05
ENSRNOT00000023368	Plg-201	1:48521771-48563776	2792	9.56594e-08	-2.36924	1.91474e-05
ENSRNOT00000016205	Csad-201	7:143781780-143793970	2024	9.71432e-08	-93.4429	1.93081e-05
ENSRNOT00000025446	LOC100911186-201	1:212570194-212579057	1497	1.0062e-07	-2.77128	1.99525e-05
ENSRNOT00000041984	LOC100360117-201	3:3389611-3390443	832	1.27282e-07	-2.46231	2.47775e-05
ENSRNOT00000087257	Cyp3a23/3a1-202	12:11655401-11733136	2059	1.2865e-07	-24.5166	2.49866e-05
ENSRNOT00000083394	LOC103693780-202	14:86414948-86613327	3375	1.31094e-07	-3.93155	2.54033e-05
ENSRNOT00000024473	Lamtor5-201	2:210034094-210039451	879	1.35091e-07	-2.3804	2.6059e-05
ENSRNOT00000057895	AC128960.1-201	17:78876110-78876537	427	1.40681e-07	-2.65246	2.70149e-05
ENSRNOT00000066913	Imp4-201	9:37769958-37775154	1744	1.42622e-07	-3.10209	2.7326e-05
ENSRNOT00000015466	Scp2-202	5:127620273-127661028	1932	1.52104e-07	-11.8875	2.88181e-05
ENSRNOT00000050018	Rab9a-201	X:29525255-29547294	1272	1.57415e-07	5.51444	2.96921e-05
ENSRNOT00000086260	Top1-203	3:156662119-156717686	2247	1.64457e-07	-7.54131	3.07879e-05
ENSRNOT00000028749	Macrod1-201	1:222311252-222451484	965	1.83104e-07	-2.70301	3.37885e-05
ENSRNOT00000000696	Psap-201	20:29831313-29856875	2568	2.02797e-07	-6.60192	3.67058e-05
ENSRNOT00000065926	Lyrm2-201	5:48047912-48050187	1548	2.12033e-07	10.1409	3.8296e-05
ENSRNOT00000015579	Cnn3-201	2:225005018-225036188	1990	2.23803e-07	-4.60332	4.0166e-05
ENSRNOT00000016458	Gchfr-201	3:110975922-110979957	631	2.26704e-07	-2.12572	4.0601e-05
ENSRNOT00000009815	Atp5mc1-201	10:83895946-83898527	561	2.27373e-07	-2.70887	4.06352e-05
ENSRNOT00000018169	Polr2e-201	7:12532894-12536791	1056	2.3375e-07	-2.23875	4.16874e-05
ENSRNOT00000028838	Itpa-201	3:123209607-123221269	1190	2.34287e-07	-3.16229	4.16957e-05
ENSRNOT00000022898	Nr2f6-201	16:19769967-19777414	1752	2.49838e-07	-2.56878	4.40943e-05
ENSRNOT00000046010	Rps18l1-201	10:104521699-104522241	542	2.53346e-07	2.24803	4.46208e-05
ENSRNOT00000005144	Slc25a11-201	10:57265703-57268081	1207	2.5682e-07	-5.77412	4.51394e-05
ENSRNOT00000027634	Dapk3-201	7:11392436-11400805	1515	2.60877e-07	-3.0869	4.56637e-05
ENSRNOT00000075823	Gatb-201	2:184600720-184679681	1700	2.74466e-07	-18.723	4.78454e-05
ENSRNOT00000034784	Ugt2b15-201	14:22375977-22486281	1808	2.8239e-07	-5.65893	4.89508e-05
ENSRNOT00000028332	Nags-201	10:90085558-90089693	2111	2.95411e-07	-3.28716	5.08711e-05
ENSRNOT00000077903	Ost4-202	6:26836215-26837440	452	3.09156e-07	-2.15269	5.28104e-05
ENSRNOT00000044484	Creb3l3-201	7:11490851-11499282	1923	3.18989e-07	-3.60136	5.42722e-05
ENSRNOT00000041034	Cyp4f4-201	7:14891000-14907305	2217	3.22815e-07	-3.38004	5.48134e-05
ENSRNOT00000014216	Lgals3-201	15:24153601-24165537	948	3.23611e-07	-14.3956	5.48392e-05
ENSRNOT00000022897	Rps27-201	2:189572175-189573280	342	3.32371e-07	-2.16805	5.62117e-05
ENSRNOT00000025826	LOC100911615-201	1:213997708-214002815	2255	3.36685e-07	25.419	5.68282e-05
ENSRNOT00000005379	Chmp6-201	10:109073677-109079348	1558	3.41391e-07	-6.5708	5.73949e-05
ENSRNOT00000047779	RT1-CE4-202	20:4673657-4935414	1558	3.52503e-07	-3.1847	5.91462e-05
ENSRNOT00000083855	RGD1310507-203	8:111741677-111777677	2318	3.53203e-07	-2.10254	5.91468e-05
ENSRNOT00000085896	Soat2-201	7:143754891-143767989	2193	3.59691e-07	-6.25696	6.01151e-05
ENSRNOT00000028102	Tkfc-201	1:226644199-226657408	2369	3.64354e-07	-3.34062	6.05376e-05
ENSRNOT00000091906	Bst2-202	16:19938783-19942353	787	3.69115e-07	-2.27833	6.10899e-05
ENSRNOT00000030054	Sys1-201	3:160908768-160912507	990	3.71516e-07	-3.43721	6.1368e-05
ENSRNOT00000009989	Mtdh-201	7:72772439-72827908	2231	3.8221e-07	-5.24927	6.3012e-05
ENSRNOT00000056894	AABR07058124.2-201	7:101069103-101072232	1215	4.43e-07	-116.397	7.13958e-05
ENSRNOT00000004172	Slc9a3r2-201	10:14003319-14013870	2146	4.54301e-07	-6.70433	7.30566e-05
ENSRNOT00000054830	Ehd1-201	1:221644866-221667239	3232	4.6163e-07	-3.51637	7.39556e-05
ENSRNOT00000077317	Dao-201	12:48354195-48365784	1041	5.3441e-07	-4.23778	8.49752e-05
ENSRNOT00000083677	Zfp36l1-201	6:103308044-103313074	2728	5.37592e-07	2.77904	8.53217e-05
ENSRNOT00000054724	Cyp2c22-201	1:259257656-259287684	1709	5.41103e-07	-2.80381	8.5719e-05
ENSRNOT00000080453	Apoe-202	1:80612894-80617057	1387	5.7078e-07	-3.04882	8.95861e-05
ENSRNOT00000014177	Ctsb-201	15:46316740-46337612	1942	5.71941e-07	-2.014	8.96031e-05
ENSRNOT00000051134	LOC100361854-201	X:115495697-115496045	348	5.7964e-07	-2.48052	9.0476e-05
ENSRNOT00000026576	Rps16-201	1:85405511-85408444	806	6.06465e-07	-2.95858	9.43169e-05
ENSRNOT00000013580	Scrn2-201	10:84966988-84971009	1493	6.12869e-07	-8.231	9.49657e-05
ENSRNOT00000008062	Aasdhppt-201	8:1439339-1450138	1073	6.25038e-07	-2.45708	9.66751e-05
ENSRNOT00000013582	Pnp-201	15:27875910-27883350	1137	6.37817e-07	-3.79096	9.81166e-05
ENSRNOT00000052098	Rangap1-201	7:122940375-122967178	2765	6.40979e-07	-3.43591	9.82476e-05
ENSRNOT00000044009	Maob-201	X:6430593-6533534	2503	6.55683e-07	-3.4418	0.000100321
ENSRNOT00000017234	Hdgf-201	2:187275119-187284281	1816	6.74803e-07	-4.5645	0.000102692
ENSRNOT00000086924	Gprc5c-202	10:103396154-103414098	1857	6.97834e-07	-16.2615	0.000105442
ENSRNOT00000024517	Ndufv1-201	1:219254278-219259448	1615	7.37276e-07	-2.01026	0.000110812
ENSRNOT00000027815	Scamp3-202	2:188489361-188495145	1479	7.44193e-07	-2.31398	0.000111654
ENSRNOT00000008289	Ngly1-201	15:10405163-10455956	2451	7.6133e-07	-13.8936	0.000114024
ENSRNOT00000078383	Gcat-201	7:120263053-120269451	1571	7.83045e-07	-3.44285	0.00011666
ENSRNOT00000003247	Morf4l2-201	X:107394485-107405564	1809	7.88755e-07	6.11571	0.000117305
ENSRNOT00000026496	Coro1a-201	1:198123883-198128857	1599	7.90997e-07	-39.2179	0.000117433
ENSRNOT00000017174	Nqo1-201	19:38422163-38437180	1579	8.26849e-07	-3.66378	0.000121694
ENSRNOT00000020609	Tmem160-201	1:78417718-78420427	819	8.50575e-07	-2.63045	0.000124754
ENSRNOT00000003965	Atp5f1b-201	7:2504694-2511749	1773	8.92483e-07	-4.04778	0.000129782
ENSRNOT00000031571	Metap2-202	7:34762230-34789479	1870	9.4437e-07	-2.62817	0.000136164
ENSRNOT00000061027	RT1-CE1-202	20:4638719-4792283	1146	1.01455e-06	-4.56261	0.000144568
ENSRNOT00000000434	Pbld1-201	20:27103316-27117663	2027	1.03142e-06	-2.28753	0.000146725
ENSRNOT00000078473	Tmem176b-202	4:78450723-78458179	1683	1.12975e-06	-3.84459	0.000158854
ENSRNOT00000049895	Os9-201	7:70380310-70407177	2684	1.17628e-06	-2.07821	0.000163773
ENSRNOT00000044551	Rpl7a-201	3:5459159-5461583	798	1.2252e-06	2.51185	0.0001692
ENSRNOT00000016263	Fdx1-201	8:56373722-56393233	877	1.23294e-06	2.14967	0.000169991
ENSRNOT00000007430	Rida-201	7:73256507-73270308	889	1.24392e-06	2.55293	0.000171228
ENSRNOT00000054958	P4hb-201	10:109736457-109747987	2489	1.26455e-06	-52.0826	0.000173787
ENSRNOT00000012177	Jagn1-201	4:145399912-145404617	1178	1.27372e-06	-3.24196	0.000174764
ENSRNOT00000025794	Sod2-201	1:47914758-47921587	2063	1.27721e-06	-2.1802	0.000174961
ENSRNOT00000016881	Sfr1-201	1:267505335-267509350	1354	1.2974e-06	-3.79463	0.000176715
ENSRNOT00000003449	C1galt1c1-201	X:124921727-124926171	1313	1.29832e-06	5.86165	0.000176715
ENSRNOT00000003832	Rbm25l1-201	10:10457319-10460756	3437	1.38965e-06	-3.84334	0.000187943
ENSRNOT00000050562	Mrpl17-201	1:170652293-170653920	935	1.41396e-06	-2.41577	0.000190625
ENSRNOT00000080990	Emd-201	X:156452817-156456035	1476	1.43465e-06	-10.1669	0.000193107
ENSRNOT00000078657	Yif1a-202	1:220470128-220474129	1030	1.44991e-06	-7.6329	0.00019424
ENSRNOT00000066119	Dpt-201	13:83073543-83102396	1616	1.48906e-06	-14.2815	0.000198236
ENSRNOT00000086572	Cfh-203	13:56978606-57080549	3169	1.56469e-06	4.71475	0.000206687
ENSRNOT00000057161	Arfgap2-201	3:80081646-80093658	2760	1.58135e-06	-3.16013	0.000208425
ENSRNOT00000042928	Mt-nd4-201	MT:10159-11537	1378	1.58274e-06	2.88564	0.000208425
ENSRNOT00000011907	Chmp5-201	5:57267311-57284448	1320	1.61264e-06	43.6679	0.000211916
ENSRNOT00000015188	Cmtm8-201	8:122848500-122904913	1147	1.64089e-06	-2.90837	0.000214752
ENSRNOT00000047550	Mt-nd1-201	MT:2739-3694	955	1.65364e-06	2.46832	0.000216089
ENSRNOT00000041106	Mknk2-201	7:11908106-11919156	3419	1.66116e-06	-4.39618	0.000216493
ENSRNOT00000019080	Mfsd2a-201	5:140642884-140657745	2132	1.66183e-06	-3.55564	0.000216493
ENSRNOT00000041384	Rps29-201	13:91334003-91334306	303	1.67058e-06	-8.23124	0.000217069
ENSRNOT00000052087	Trabd-201	7:130058251-130069224	2397	1.67135e-06	-2.58617	0.000217069
ENSRNOT00000027608	Dap3-201	2:188225612-188252725	1849	1.67651e-06	-3.07824	0.000217407
ENSRNOT00000045996	Haao-201	6:7045151-7058314	1252	1.68807e-06	-2.17429	0.000218573
ENSRNOT00000028145	Mphosph8-201	15:36918842-36946708	2866	1.69852e-06	-6.12819	0.000219549
ENSRNOT00000073790	Sri-201	4:23006242-23018983	847	1.70077e-06	-36.755	0.000219549
ENSRNOT00000027944	Fcgrt-201	1:101086876-101095594	1550	1.9814e-06	-2.2374	0.000252707
ENSRNOT00000040430	Atp1a1-201	2:204003741-204032023	3636	2.05213e-06	-5.61077	0.000260168
ENSRNOT00000090666	Dmgdh-202	2:23289373-23370477	3200	2.08398e-06	-19.1614	0.00026343
ENSRNOT00000027260	Atf5-201	1:100808240-100810522	1030	2.12945e-06	-191.341	0.000267578
ENSRNOT00000054963	Slc25a10-201	10:109665681-109673143	1916	2.15559e-06	-2.43453	0.000270064
ENSRNOT00000022702	Gulo-201	15:42671202-42693694	2299	2.2156e-06	-2.11428	0.000276767
ENSRNOT00000027057	Xrcc1-201	1:81413352-81441678	2078	2.26046e-06	-6.72596	0.000281544
ENSRNOT00000093338	Ntan1-204	10:3218474-3225074	203	2.26744e-06	-5.40607	0.000282002
ENSRNOT00000068323	Rps28-201	7:18682070-18683440	339	2.28683e-06	-2.04998	0.000283997
ENSRNOT00000024310	Ahcy-201	3:150587832-150603082	2054	2.29986e-06	-2.13228	0.000284784
ENSRNOT00000015956	Got2-201	19:9587652-9613340	2358	2.31733e-06	-3.83412	0.00028653
ENSRNOT00000002358	Psmd2-201	11:83934086-83944763	2946	2.32979e-06	-5.56123	0.000287653
ENSRNOT00000045571	Cyp4a3-202	5:134469269-134484839	1521	2.46073e-06	-3.45863	0.000300393
ENSRNOT00000071543	Tsfm-201	7:70311949-70319346	1118	2.46677e-06	-12.4017	0.000300638
ENSRNOT00000030340	Tmem134-202	1:219374059-219379557	909	2.47599e-06	-2.1308	0.0003013
ENSRNOT00000080274	Adk-202	15:3033494-3410423	1932	2.47928e-06	-3.20783	0.0003013
ENSRNOT00000050931	Snrpg-201	1:91588227-91588609	382	2.51977e-06	-6.15942	0.000305348
ENSRNOT00000006754	Rpl7a-202	3:4867232-4869656	798	2.55633e-06	2.43808	0.000309337
ENSRNOT00000020625	Alad-201	5:78368866-78379346	1378	2.65701e-06	-2.21513	0.0003188
ENSRNOT00000018795	Hsd17b2-201	19:50246401-50317891	1268	2.67758e-06	-3.85629	0.000320816
ENSRNOT00000057022	Cd5l-201	2:186685103-186696117	1965	2.72648e-06	-4.2597	0.000326215
ENSRNOT00000005934	Tcn2-201	14:84174137-84189266	1899	2.75941e-06	-2.87841	0.000328983
ENSRNOT00000045275	Cbs-202	20:10361987-10386663	2522	2.76122e-06	-2.56009	0.000328983
ENSRNOT00000012253	Fam133b-201	4:27730050-27755103	738	2.78868e-06	-6.0676	0.000331131
ENSRNOT00000057096	Timm50-201	1:85470830-85480407	1183	2.79092e-06	-6.24786	0.000331131
ENSRNOT00000025319	Pnpla2-201	1:214434625-214439720	2243	2.82039e-06	-3.01775	0.000332803
ENSRNOT00000012819	Cyp7a1-201	5:19358733-19368431	3544	2.82557e-06	-9.21458	0.000332921
ENSRNOT00000021646	Hsd17b4-201	18:44810387-44897640	2621	2.88162e-06	-7.80952	0.000338119
ENSRNOT00000023651	Cltb-201	17:10537364-10554989	1047	2.946e-06	-3.18002	0.000343669
ENSRNOT00000024160	Akr7a3-201	5:157801162-157813756	1259	3.00889e-06	-3.16913	0.000349676
ENSRNOT00000018622	Rbp1-201	8:106449320-106470842	696	3.05935e-06	-2.43908	0.000353241
ENSRNOT00000009985	Cyp51-201	4:27175242-27194018	3341	3.06728e-06	-2.02413	0.000353564
ENSRNOT00000064723	Sec23b-201	3:138715569-138757111	2758	3.0771e-06	-10.1651	0.000354216
ENSRNOT00000018009	Prkcsh-201	8:23014955-23026503	1975	3.13284e-06	-2.7361	0.000358209
ENSRNOT00000037218	LOC100365958-201	7:71057910-71072423	1697	3.33078e-06	-2.52665	0.000377794
ENSRNOT00000041892	RGD1563601-201	17:27765007-27765754	747	3.33932e-06	-4.41234	0.000378259
ENSRNOT00000018310	Txndc5-201	17:26925827-26953970	2620	3.45798e-06	-2.42525	0.000388083
ENSRNOT00000016454	Glyat-201	1:229066044-229080410	1284	3.51374e-06	-2.38458	0.000392787
ENSRNOT00000075174	Atg4d-201	8:22291444-22301331	1939	3.58752e-06	-3.81832	0.000400507
ENSRNOT00000050204	AABR07065438.1-201	6:128738387-128739319	932	3.69514e-06	-2.38801	0.000411981
ENSRNOT00000036460	Pon2-201	4:30344708-30380119	1755	3.80544e-06	-2.71478	0.00042317
ENSRNOT00000012611	Ogfr-201	3:175930504-176099949	2057	3.81673e-06	-3.95788	0.000423871
ENSRNOT00000001036	RT1-S3-201	20:3176106-3179818	1692	3.85055e-06	-2.0307	0.000427069
ENSRNOT00000044183	Habp2-202	1:277068760-277104565	2162	3.99051e-06	-3.32611	0.000441235
ENSRNOT00000040056	Cish-201	8:116054464-116060723	3169	4.01073e-06	-7.56694	0.000442528
ENSRNOT00000014913	Coq6-201	6:108076305-108087696	1788	4.05619e-06	-6.54247	0.000446386
ENSRNOT00000057898	Mt1-201	17:78793335-78793724	389	4.1328e-06	-52.607	0.000453818
ENSRNOT00000087731	H1f2-201	17:43639748-43640387	639	4.13658e-06	-4.12968	0.000453818
ENSRNOT00000080490	LOC100912564-203	17:44522139-44526583	1296	4.20534e-06	2.04758	0.000460417
ENSRNOT00000042055	Ndrg2-202	15:28305820-28314459	2026	4.2855e-06	-2.90185	0.00046859
ENSRNOT00000027170	Mcrip2-201	10:15230800-15235740	820	4.41937e-06	-2.99968	0.000481372
ENSRNOT00000008337	Aco1-201	5:56425023-56481218	3465	4.47837e-06	-4.10291	0.000487175
ENSRNOT00000075342	RT1-DMb-201	20:3945600-3952846	1301	4.49621e-06	-7.75025	0.000487904
ENSRNOT00000044711	Ftl1-201	5:152325870-152326778	908	4.50326e-06	2.60984	0.00048801
ENSRNOT00000028095	Pmvk-201	2:188784221-188793895	1092	4.51587e-06	-2.04339	0.000488754
ENSRNOT00000000501	Rnf5-201	20:4366245-4368693	1119	4.52687e-06	-2.84394	0.000489321
ENSRNOT00000019108	Acad9-201	2:122782059-122805768	2517	4.57971e-06	-12.0076	0.000492871
ENSRNOT00000085165	Gmppa-202	9:82632229-82639821	1775	4.60594e-06	-6.30114	0.000494725
ENSRNOT00000032026	Cox6b1-201	1:89075974-89084859	601	4.72078e-06	-2.25123	0.000506421
ENSRNOT00000012060	Tmem218-201	8:39687268-39702902	1281	4.77895e-06	-4.96827	0.000512015
ENSRNOT00000007398	Myh9-201	7:118741109-118792625	6221	4.79285e-06	-4.70187	0.000512215
ENSRNOT00000087662	Gpd1-201	7:141370490-141377928	2871	5.08262e-06	-4.83617	0.000540661
ENSRNOT00000083560	LOC103692171-201	4:114814055-114817465	2701	5.08445e-06	-4.76058	0.000540661
ENSRNOT00000073135	Pradc1-201	4:117230527-117234928	1112	5.14592e-06	-3.98526	0.000545833
ENSRNOT00000014941	Anxa11-201	16:3867207-3912148	2394	5.41135e-06	-3.79012	0.000570431
ENSRNOT00000024622	LOC501233-203	19:15294247-15335002	2138	5.42384e-06	-3.26899	0.000571041
ENSRNOT00000003004	Hsd17b11-201	14:7073444-7104566	1594	5.47279e-06	-3.08628	0.000573356
ENSRNOT00000082497	RT1-CE4-204	20:4788988-4921348	1573	5.61721e-06	-3.24601	0.00058704
ENSRNOT00000089980	Ppie-202	5:140822140-140834959	1177	5.67071e-06	-5.52559	0.000591904
ENSRNOT00000022557	Dgat2-201	1:164113458-164143818	2294	5.68696e-06	-23.7798	0.000592872
ENSRNOT00000073796	Adssl1-201	6:137184819-137206693	1797	5.77111e-06	-2.96922	0.000599442
ENSRNOT00000019647	LOC691807-201	2:227095486-227097246	1080	5.87636e-06	-2.38418	0.000608887
ENSRNOT00000010101	Lgmn-201	6:126282232-126320726	1984	5.96442e-06	-4.28062	0.000617044
ENSRNOT00000073983	Ccs-201	1:220075246-220096404	1108	6.01533e-06	-2.68395	0.000621017
ENSRNOT00000021865	Kyat1-201	3:8752624-8766433	1417	6.40254e-06	-32.4178	0.000646094
ENSRNOT00000035785	Eif5b-201	9:44681493-44713199	3618	6.56504e-06	-3.67143	0.000658586
ENSRNOT00000041326	AABR07034639.1-201	11:82366073-82366505	432	6.61118e-06	5.38297	0.000662434
ENSRNOT00000073599	Hax1-202	2:189330901-189333322	636	6.65512e-06	-3.37839	0.00066527
ENSRNOT00000013400	Dync1i2-201	3:57817692-57868854	2743	6.99529e-06	-8.13801	0.000694497
ENSRNOT00000006117	Rxrg-201	13:85818472-85868543	1965	6.9971e-06	-3.5035	0.000694497
ENSRNOT00000008698	Thnsl2-201	4:98976549-98995590	1811	7.16703e-06	-3.11353	0.00070812
ENSRNOT00000030558	Swi5-201	3:11307980-11317049	685	7.19433e-06	114.974	0.000709993
ENSRNOT00000061734	Ces2j-201	19:487722-494937	1671	7.31518e-06	-6.97116	0.000720248
ENSRNOT00000085978	Ndufa12-202	7:35125423-35167406	647	7.32939e-06	-5.62459	0.000720814
ENSRNOT00000088996	LOC102548286-202	13:90514335-90523911	2309	7.502e-06	-2.40172	0.000734761
ENSRNOT00000019023	Cps1-201	9:74124015-74236274	5548	7.69614e-06	-4.48692	0.000749946
ENSRNOT00000092432	Bri3-203	12:12322246-12330929	744	7.79788e-06	-6.87619	0.000757258
ENSRNOT00000019923	Mlycd-201	19:52032885-52048753	2055	7.8093e-06	42.963	0.000757502
ENSRNOT00000026704	Atp6v0b-201	5:136718351-136721379	1005	7.93636e-06	-2.94092	0.000768076
ENSRNOT00000018369	Plpbp-201	16:69163576-69176036	2047	7.99342e-06	-3.64964	0.000772719
ENSRNOT00000021803	Rpl7l1-201	9:16508798-16513120	741	8.10204e-06	-3.83705	0.000781443
ENSRNOT00000004519	Tmem63a-201	13:99220509-99253176	3269	8.14493e-06	-5.31461	0.00078469
ENSRNOT00000011731	Jun-201	5:114011188-114014277	3089	8.16241e-06	3.7543	0.000785484
ENSRNOT00000066373	LOC100911130-201	X:15441650-15448403	519	8.23754e-06	-2.47827	0.000788827
ENSRNOT00000071003	Ugt1a6-208	9:95233956-95302810	2252	8.34869e-06	-24.4805	0.000796413
ENSRNOT00000085555	Stard10-202	1:166428760-166457509	1395	8.35055e-06	-2.37637	0.000796413
ENSRNOT00000017268	Erlin1-201	1:263810438-263845762	3129	8.43382e-06	-8.30625	0.000803423
ENSRNOT00000013238	Acadm-201	2:260124417-260148589	1953	8.5009e-06	-4.29782	0.000808818
ENSRNOT00000000553	Pfdn6-201	20:5455973-5457444	584	8.58735e-06	-2.40632	0.000813494
ENSRNOT00000001745	Get4-201	12:17469111-17486157	2091	8.72568e-06	-3.6457	0.000823846
ENSRNOT00000002327	Abcf3-201	11:84026206-84037938	2521	8.88139e-06	-2.99944	0.000835764
ENSRNOT00000023137	Poll-201	1:265290338-265298797	2295	8.96291e-06	-18.0419	0.000841574
ENSRNOT00000091465	Macrod1-202	1:222310919-222451153	1138	9.13826e-06	-2.30483	0.000855206
ENSRNOT00000018073	Add1-201	14:81367467-81426496	3800	9.28527e-06	-6.15857	0.00086801
ENSRNOT00000075042	Aldh1l1-201	4:123516787-123557501	2724	9.36742e-06	-5.36505	0.000870904
ENSRNOT00000050373	Gnl1-201	20:3290542-3299580	2140	9.58047e-06	-5.20265	0.000885881
ENSRNOT00000011047	Hnrnpm-201	7:18516511-18554227	2073	9.58059e-06	-3.45249	0.000885881
ENSRNOT00000020252	Gsr-201	16:62197616-62239987	1850	9.72188e-06	-6.293	0.000897971
ENSRNOT00000018864	Efhd2-201	5:160407777-160423811	2107	9.97741e-06	-4.23893	0.000915608
ENSRNOT00000061687	RGD1565355-202	4:14151342-14191498	2436	1.02022e-05	-5.17387	0.000934221
ENSRNOT00000000635	Mtch1-201	20:6937346-6961162	1802	1.0333e-05	-3.26669	0.000942161
ENSRNOT00000000072	Atp5me-201	14:2325307-2326436	289	1.05057e-05	-2.54635	0.000955838
ENSRNOT00000061070	Mapkapk2-201	13:47785160-47831110	2526	1.09076e-05	-10.1738	0.00098503
ENSRNOT00000019707	Vps28-201	7:117684338-117688187	977	1.09593e-05	-2.02451	0.000987919
ENSRNOT00000061114	RT1-CE7-202	20:4694471-4896970	1753	1.09628e-05	-3.53002	0.000987919
ENSRNOT00000002715	Rcan1-201	11:32539682-32550539	2156	1.10119e-05	-2.20167	0.000990243
ENSRNOT00000016297	Sdf2-201	10:65507363-65517838	1262	1.12263e-05	-2.06912	0.00100633
ENSRNOT00000051149	Rps4x-204	4:35729627-35730599	972	1.13105e-05	-10.2339	0.00101281
ENSRNOT00000000306	Slc25a1-201	11:87204174-87207264	1715	1.13828e-05	-3.52473	0.00101714
ENSRNOT00000005052	Qsox1-201	13:73423396-73460912	2442	1.14596e-05	-6.4742	0.00102103
ENSRNOT00000031164	Akt1-201	6:137218375-137236258	2418	1.20509e-05	-2.85745	0.00106924
ENSRNOT00000083629	Akr7a2-202	5:157759447-157768471	1239	1.22795e-05	-2.19079	0.00108587
ENSRNOT00000019072	Ces2h-201	19:37052555-37067156	2000	1.25652e-05	-5.13401	0.00110653
ENSRNOT00000081914	Atp6ap1-201	X:156407936-156415145	2203	1.27154e-05	-4.55141	0.00111744
ENSRNOT00000001625	Pfkl-201	20:11393876-11415882	2753	1.27834e-05	-9.22697	0.00112226
ENSRNOT00000090146	Gsta4-202	8:85497556-85518879	887	1.31888e-05	-318.653	0.00115191
ENSRNOT00000090745	LOC100134871-201	1:168957459-168958836	623	1.32904e-05	-18.578	0.00115959
ENSRNOT00000079854	Tubb5-201	20:3422488-3426371	2128	1.36566e-05	-64.6686	0.00118667
ENSRNOT00000025608	Nutf2-201	19:37830916-37852189	1927	1.37448e-05	3.69935	0.0011919
ENSRNOT00000027118	Wbp1l-201	1:266358727-266415296	3797	1.41187e-05	-2.15712	0.00122308
ENSRNOT00000084846	Tsen34l1-201	1:64092225-64099277	1344	1.4248e-05	-2.64001	0.00123177
ENSRNOT00000042558	Cib1-201	1:142014957-142020525	879	1.44538e-05	-2.53081	0.00124576
ENSRNOT00000068135	Rpn2-201	3:153398129-153445632	2536	1.4494e-05	-4.91844	0.00124671
ENSRNOT00000022900	Nadk-201	5:172986290-173015494	3443	1.54873e-05	-4.32068	0.00131617
ENSRNOT00000015011	Tmem254-201	16:3817401-3821270	1184	1.57974e-05	-3.58432	0.00133852
ENSRNOT00000022971	Lhpp-201	1:204617851-204708987	1640	1.5955e-05	-2.10799	0.00135053
ENSRNOT00000022389	Idi1-201	17:57976267-57984036	2811	1.60105e-05	-3.21876	0.00135387
ENSRNOT00000072666	AABR07043748.1-201	19:38340737-38344845	4108	1.60484e-05	-3.06888	0.00135451
ENSRNOT00000073160	Rps19l2-202	9:16802318-16807966	474	1.6415e-05	5.48273	0.00138121
ENSRNOT00000013392	Slc33a1-201	2:154520174-154542557	1970	1.65179e-05	-6.57607	0.0013885
ENSRNOT00000018328	Tgm2-201	3:154597167-154627257	3506	1.656e-05	-4.05473	0.00138946
ENSRNOT00000021716	Coq9-201	19:10583856-10596851	1705	1.66883e-05	-2.61913	0.0013973
ENSRNOT00000013052	Creld1-201	4:145440113-145449892	2047	1.68582e-05	-4.39691	0.00140876
ENSRNOT00000022661	Msrb2-201	17:86066832-86148130	1148	1.7649e-05	-2.11631	0.00146681
ENSRNOT00000023623	Slc38a3-201	8:116406240-116422366	2420	1.76564e-05	-2.52872	0.00146681
ENSRNOT00000068129	Sqor-201	3:114900342-114939370	1594	1.76812e-05	-4.61371	0.00146705
ENSRNOT00000033015	Sars1-201	2:211219749-211235440	1857	1.77714e-05	-2.64027	0.00147062
ENSRNOT00000044171	Msmo1-201	16:26859396-26875973	1849	1.80378e-05	-15.2905	0.00149121
ENSRNOT00000025787	Polr1c-201	9:17120758-17124871	1290	1.81804e-05	-2.89933	0.00150154
ENSRNOT00000083686	Cyp4a2-202	5:134197520-134207847	1515	1.82277e-05	-4.1083	0.00150399
ENSRNOT00000025098	Txndc9-201	9:44647706-44657779	1242	1.8597e-05	-2.51683	0.00152706
ENSRNOT00000023221	Tmem50a-201	5:153233961-153252021	1037	1.92951e-05	-2.23616	0.00158132
ENSRNOT00000026202	Sf3a2-201	7:11777825-11783849	1607	1.94631e-05	-8.81752	0.00159355
ENSRNOT00000082098	Igsf5-202	11:36736585-36779615	1997	2.00476e-05	-3.41279	0.00163669
ENSRNOT00000089931	Serpina1-203	6:127610242-127630734	1618	2.03871e-05	-3.58381	0.00165865
ENSRNOT00000019184	Ptges2-201	3:11424098-11431402	2163	2.13596e-05	-2.91035	0.00172629
ENSRNOT00000010197	Rab11b-201	7:18598879-18612147	1632	2.13683e-05	-2.49263	0.00172629
ENSRNOT00000014658	Hadh-201	2:236353444-236395067	1659	2.17185e-05	-3.17273	0.0017496
ENSRNOT00000028143	Pten-201	1:251421595-251487832	1628	2.23431e-05	29.1428	0.00178974
ENSRNOT00000020946	Fuca2-201	1:7658889-7673683	1651	2.26356e-05	-4.36136	0.00180976
ENSRNOT00000026113	AABR07006025.1-201	1:214015218-214024153	1014	2.26909e-05	-2.16378	0.00181248
ENSRNOT00000079707	Nucks1-202	13:48689961-48704771	732	2.32619e-05	-29.9401	0.00184768
ENSRNOT00000084027	Rps21-201	3:175629373-175630048	246	2.33767e-05	-2.2054	0.00185506
ENSRNOT00000027834	Fads1-201	1:226234073-226249138	3416	2.35695e-05	-5.69169	0.00186838
ENSRNOT00000092028	Rfxap-201	2:144003453-144007636	1638	2.36137e-05	-4.50675	0.00186865
ENSRNOT00000066371	Tmem14c-202	17:21571517-21577631	863	2.39353e-05	-2.012	0.00189058
ENSRNOT00000026120	Edem2-201	3:151232750-151258580	1884	2.55422e-05	-3.12005	0.00200078
ENSRNOT00000071505	Dpm2-201	3:11587940-11590528	814	2.55947e-05	53.6281	0.00200305
ENSRNOT00000029829	Coro1b-201	1:219397849-219403260	1899	2.58557e-05	-2.02305	0.00202162
ENSRNOT00000003728	Kdsr-201	13:26780632-26812215	1216	2.67813e-05	-8.58339	0.0020825
ENSRNOT00000027370	Tubg1-201	10:89030864-89037455	1658	2.72182e-05	-3.33492	0.00211069
ENSRNOT00000027290	RGD1310127-201	1:199687777-199716205	2553	2.7292e-05	-5.64998	0.00211449
ENSRNOT00000026454	Rce1-201	1:219860826-219863926	1414	2.73988e-05	-4.4702	0.0021189
ENSRNOT00000006884	Rtfdc1-201	3:170443854-170473456	2156	2.76906e-05	-3.38653	0.00213564
ENSRNOT00000086245	Cfi-201	2:235264218-235305781	2091	2.78319e-05	-3.45508	0.00214266
ENSRNOT00000043559	Hsd17b10-201	X:21696771-21699241	931	2.79768e-05	-6.92522	0.00214992
ENSRNOT00000026184	Ltbr-201	4:157822839-157829241	2075	2.81604e-05	-2.31961	0.00215818
ENSRNOT00000042314	Cdc37-201	8:22160921-22173797	1601	2.82862e-05	-2.164	0.00216198
ENSRNOT00000085619	Mreg-202	9:79490049-79530821	2843	2.83563e-05	7.52474	0.00216539
ENSRNOT00000047698	Snd1-201	4:55772376-56171668	3448	2.85744e-05	-3.53399	0.00218008
ENSRNOT00000010610	Ankrd9-201	6:135410029-135412312	1452	2.89023e-05	-12.3309	0.00220116
ENSRNOT00000027756	Fads2-201	1:226114412-226152524	1359	2.9574e-05	-4.32753	0.00224228
ENSRNOT00000018336	Sdha-201	1:31545630-31570601	2277	3.01877e-05	-3.23102	0.00228067
ENSRNOT00000088097	Gorasp2-201	3:56966653-56995369	2148	3.06022e-05	-3.00197	0.00230584
ENSRNOT00000000107	Pdzk1-201	2:198965684-198999323	1980	3.08768e-05	-3.88244	0.00232242
ENSRNOT00000084154	Cops2-202	3:118109405-118137191	3432	3.09517e-05	12.6941	0.002326
ENSRNOT00000065947	Abca8a-202	10:98319479-98390384	5647	3.10768e-05	4.83954	0.00233334
ENSRNOT00000080421	Morf4l1-201	8:97474091-97494834	972	3.1184e-05	-2.82794	0.00233932
ENSRNOT00000027220	Scly-201	9:98438438-98459080	2206	3.14419e-05	-5.25504	0.00235452
ENSRNOT00000086701	Echdc3-202	17:76002352-76022282	897	3.20423e-05	-4.30979	0.00239316
ENSRNOT00000017742	Foxa2-201	3:142383277-142387481	2224	3.22716e-05	-2.60945	0.00240606
ENSRNOT00000005459	Marc1-201	13:102698545-102721218	1942	3.26368e-05	-2.20127	0.00243115
ENSRNOT00000011069	Hibadh-201	4:82604372-82702429	1749	3.27133e-05	-3.34617	0.00243473
ENSRNOT00000060444	Eif3b-201	12:16285732-16310190	2919	3.34948e-05	-5.65452	0.00248636
ENSRNOT00000015384	Lrp3-201	1:91448360-91462603	3892	3.35473e-05	-3.33021	0.00248809
ENSRNOT00000012256	Ddx24-201	6:127302200-127319362	2820	3.3962e-05	-3.21335	0.00251665
ENSRNOT00000042432	Cbs-201	20:10362171-10386751	2471	3.42984e-05	-2.12241	0.00253716
ENSRNOT00000077070	Dpt-203	13:83073549-83102401	2104	3.53796e-05	-21.6588	0.0025992
ENSRNOT00000037066	Timm17b-201	X:15340838-15347591	519	3.53815e-05	-2.31307	0.0025992
ENSRNOT00000063779	Smim1-201	5:171309334-171312026	453	3.57914e-05	-3.10996	0.00262252
ENSRNOT00000023350	Sord-201	3:114176308-114207366	2137	3.62819e-05	-2.40167	0.00265617
ENSRNOT00000014383	Trappc3-201	5:144281613-144295331	1355	3.64955e-05	-2.32962	0.00266855
ENSRNOT00000050556	Gpt-201	7:117759082-117761931	1740	3.65138e-05	-2.07027	0.00266855
ENSRNOT00000016792	Saraf-201	16:61735180-61753476	1885	3.76454e-05	-8.34472	0.00274418
ENSRNOT00000087003	Trappc1-202	10:55924937-55926783	901	3.82726e-05	-2.62352	0.00278275
ENSRNOT00000068497	Sf3b2-201	1:220645671-220665603	3224	3.95042e-05	-2.80015	0.00285521
ENSRNOT00000020280	Dnttip1-201	3:161212155-161236121	1655	3.98212e-05	-3.5763	0.00287324
ENSRNOT00000014496	RGD1309534-201	8:13838571-13861212	2489	4.06569e-05	-79.4304	0.00292857
ENSRNOT00000056181	Grwd1-201	1:101813683-101819478	2012	4.12248e-05	-14.2189	0.00295946
ENSRNOT00000012665	Lrpap1-201	14:80911269-80924831	2966	4.2078e-05	-27.9225	0.00301177
ENSRNOT00000027800	Tm6sf2-201	16:21092307-21099878	1745	4.30199e-05	-5.94512	0.00307534
ENSRNOT00000001960	Tmem120a-201	12:23989595-23998254	1555	4.44048e-05	-2.53087	0.00316637
ENSRNOT00000074253	Lonp1-201	9:10428852-10441177	2955	4.48464e-05	-2.48825	0.0031925
ENSRNOT00000046108	Mt-atp6-201	MT:7918-8599	681	4.55815e-05	2.48857	0.00323941
ENSRNOT00000027700	Pklr-201	2:188449209-188456759	1725	4.6132e-05	-8.8014	0.00327307
ENSRNOT00000075121	Stap2-201	9:11064604-11070122	1398	4.65972e-05	-2.24642	0.00329574
ENSRNOT00000021286	Epn1-201	1:72294152-72311856	2171	4.66066e-05	-18.1344	0.00329574
ENSRNOT00000013301	Srsf4-201	5:150032998-150060765	2205	4.67304e-05	-2.07841	0.00329901
ENSRNOT00000079380	Nudc-201	5:151754715-151768123	1307	4.6856e-05	-2.2503	0.00330513
ENSRNOT00000023867	Ppp1r37-201	1:80439717-80471527	2933	4.79302e-05	-3.83243	0.00336973
ENSRNOT00000005611	Aldh9a1-201	13:85580827-85597493	2336	4.80058e-05	-2.24881	0.00337226
ENSRNOT00000066014	Erh-201	6:104280407-104290579	719	4.85291e-05	48.0882	0.00339779
ENSRNOT00000027995	Bckdha-201	1:82423276-82452281	1896	4.8735e-05	-2.2628	0.00340381
ENSRNOT00000037393	Ostc-201	2:235816335-235831670	1060	4.98097e-05	-2.12337	0.00347032
ENSRNOT00000066133	Csnk1a1-202	18:56887495-56918345	2072	5.02891e-05	-23.4256	0.00349513
ENSRNOT00000057190	Sertad3-201	1:84280944-84284663	1314	5.04939e-05	25.7049	0.0035065
ENSRNOT00000077372	Gsta3-201	9:27402380-27416409	663	5.23043e-05	-3.60651	0.00361184
ENSRNOT00000045049	Acaa1a-201	8:128027957-128036236	1302	5.28828e-05	-2.25793	0.00364266
ENSRNOT00000042098	Mt-cyb-201	MT:14135-15278	1143	5.30991e-05	2.46007	0.00365164
ENSRNOT00000028514	Tmem147-201	1:89177991-89179825	871	5.50471e-05	-2.14425	0.00375481
ENSRNOT00000011490	Xpc-201	4:123134456-123161985	3633	5.51542e-05	-9.51678	0.00375654
ENSRNOT00000021705	Rpf1-201	2:252368328-252382955	1395	5.54015e-05	-6.19421	0.00377036
ENSRNOT00000004673	Acsf2-201	10:82284719-82326771	3083	5.54467e-05	-3.86194	0.00377042
ENSRNOT00000015468	Lrp10-201	15:33108670-33114829	2911	5.58728e-05	-5.78302	0.00379333
ENSRNOT00000025309	Gga2-201	1:191951580-191984858	2809	5.624e-05	-5.9881	0.00381385
ENSRNOT00000000079	Acot7-201	5:169357516-169450219	1499	5.62648e-05	-2.6268	0.00381385
ENSRNOT00000072509	Cox19-201	12:17395623-17405103	2648	5.94359e-05	-21.9434	0.003996
ENSRNOT00000072434	Cd151-201	1:214446658-214450666	1642	6.26104e-05	-3.43298	0.00417087
ENSRNOT00000041925	Akr1c12-201	17:69695549-69711689	1234	6.40247e-05	-65.8718	0.00424868
ENSRNOT00000077462	Hpn-202	1:89534105-89539210	1303	6.43165e-05	-3.68482	0.00426449
ENSRNOT00000009198	Rnpep-201	13:52092858-52111363	2332	6.45974e-05	-5.80016	0.00427978
ENSRNOT00000021400	Cndp2-201	18:81521967-81539065	2088	6.4775e-05	-4.25351	0.00428585
ENSRNOT00000086306	Coq8a-202	13:98451941-98480419	2249	6.47898e-05	-38.4294	0.00428585
ENSRNOT00000026051	Ampd2-201	2:210861624-210873024	3362	6.54461e-05	-19.2709	0.00432254
ENSRNOT00000074471	Tmem37-201	13:36094519-36101411	1290	6.88918e-05	-2.9904	0.00450466
ENSRNOT00000045315	Col18a1-201	20:12225201-12332858	5007	7.01988e-05	-2.46603	0.00457604
ENSRNOT00000046155	Tcf25-201	19:56179110-56213310	2787	7.03187e-05	-2.59017	0.00458035
ENSRNOT00000078222	D2hgdh-202	9:100956476-100974551	3612	7.10959e-05	-7.54191	0.00462125
ENSRNOT00000018447	Scd-201	1:264160128-264172729	4475	7.30871e-05	-18.2005	0.00472092
ENSRNOT00000017280	Mrpl3-201	8:113603532-113626893	1647	7.35869e-05	-2.88976	0.0047496
ENSRNOT00000059735	Ccdc80-201	11:60645085-60679555	4977	7.37444e-05	-3.64113	0.00475615
ENSRNOT00000023125	LOC306766-201	17:10586042-10598629	2354	7.54648e-05	-3.35219	0.00484507
ENSRNOT00000018145	Mvd-201	19:55258904-55268951	1697	7.78805e-05	-4.09622	0.00497015
ENSRNOT00000036719	Tysnd1-201	20:31313017-31318736	2313	7.81064e-05	-2.15743	0.00498083
ENSRNOT00000091647	NEWGENE_2134-202	1:80606639-80609836	435	7.83076e-05	2.02636	0.00498751
ENSRNOT00000091612	Clu-203	15:42659370-42665853	1326	7.83284e-05	-10.4667	0.00498751
ENSRNOT00000003012	Plac8-201	14:10692763-10714524	733	7.91587e-05	-2.97424	0.0050292
ENSRNOT00000040845	Jup-201	10:88280518-88307132	3437	8.23362e-05	-3.46763	0.0051999
ENSRNOT00000049695	AABR07053166.1-201	3:94832875-94833406	531	8.28303e-05	2.59165	0.00522334
ENSRNOT00000061392	Cfap20-201	19:10024946-10038784	1180	8.36111e-05	-2.2913	0.00526867
ENSRNOT00000042108	AC115277.1-201	7:15385867-15386419	552	8.66115e-05	-7.78426	0.0054336
ENSRNOT00000019761	Pigt-201	3:160945358-160954739	2363	8.80009e-05	-9.88515	0.00550857
ENSRNOT00000030934	Clk1-201	9:65296777-65307995	1774	8.91743e-05	2.05874	0.00556156
ENSRNOT00000036247	LOC103690006-201	4:117800627-117814658	1130	9.05685e-05	-5.12515	0.00562931
ENSRNOT00000076484	Taf9-205	2:30664694-30668414	1202	9.05914e-05	-3.24386	0.00562931
ENSRNOT00000084749	AABR07046778.1-201	5:6373582-6373849	267	9.07985e-05	6.58319	0.00563806
ENSRNOT00000073774	Mvk-201	12:47904718-47919400	1188	9.11777e-05	-3.76545	0.00565747
ENSRNOT00000024941	Ppp1r3c-201	1:255371809-255376833	2771	9.20428e-05	2.37825	0.0056904
ENSRNOT00000008374	Mthfd1-201	6:99282849-99350340	3333	9.35334e-05	-2.44468	0.00576162
ENSRNOT00000007181	Maea-201	14:82664248-82697673	2150	9.40542e-05	-16.1202	0.00578296
ENSRNOT00000079036	Cyp2b1-202	7:99142449-99181773	1878	9.57998e-05	-45.4181	0.00587146
ENSRNOT00000013538	Lgals1-201	7:120153183-120156289	505	9.89963e-05	6.04183	0.00604916
ENSRNOT00000027407	Ctsd-201	1:215541541-215553451	2022	9.94788e-05	-3.53331	0.0060707
ENSRNOT00000024779	Clptm1-201	1:80549042-80580662	2458	0.00010274	-3.10086	0.00622953
ENSRNOT00000027544	Gfra3-201	18:27491844-27520295	2222	0.000102973	-3.69526	0.00623921
ENSRNOT00000017927	Ggcx-201	4:100277411-100293250	2862	0.000104706	-2.66386	0.00632169
ENSRNOT00000076695	Gbe1-202	11:7210208-7413999	1323	0.000104998	-3.95724	0.00633479
ENSRNOT00000022126	Acsl5-201	1:276240702-276290008	2453	0.000105281	-5.24419	0.0063474
ENSRNOT00000087604	Mtch2-202	3:79678200-79692327	756	0.000105997	-2.52728	0.00637249
ENSRNOT00000011392	Ppcs-201	5:138466292-138470096	1725	0.000108165	-2.8334	0.00647995
ENSRNOT00000085843	Polr2m-202	8:77985189-77992621	2077	0.000108882	-2.15494	0.00650455
ENSRNOT00000026706	Isoc1-201	18:53727208-53745200	894	0.000109003	-5.86485	0.00650724
ENSRNOT00000026968	Dpp3-201	1:220166126-220188541	2608	0.00010971	-2.15945	0.00653566
ENSRNOT00000025652	Ugt1a6-203	9:95202631-95302822	2264	0.000110205	14.895	0.00655595
ENSRNOT00000002576	Prodh1-201	11:87058615-87075785	2182	0.000111853	-2.24435	0.00662622
ENSRNOT00000004320	Lgals3bp-201	10:107415325-107424710	2198	0.000116149	-4.24502	0.00684255
ENSRNOT00000023457	Bloc1s3-201	1:80415685-80416273	588	0.00011689	-4.93972	0.00687578
ENSRNOT00000038764	Coa4-201	1:165549343-165552572	1363	0.000117224	26.3051	0.00688686
ENSRNOT00000039836	Psmd3-201	10:86599219-86611188	2147	0.000117858	-2.38401	0.00691359
ENSRNOT00000016432	Rab7a-201	4:119910477-119959173	2075	0.000118339	32.9489	0.00693317
ENSRNOT00000089575	Man2c1-202	8:61805676-61816800	3237	0.000120373	-2.67637	0.00703784
ENSRNOT00000054957	Arhgdia-201	10:109754003-109757550	1880	0.000121226	-3.0797	0.00707308
ENSRNOT00000077363	Trim27-201	17:45613863-45626212	2077	0.000121336	-2.94684	0.00707335
ENSRNOT00000068524	Tsn-202	13:34238716-34251650	3053	0.000121982	-8.89072	0.00709286
ENSRNOT00000074801	Pglyrp2-201	7:14429700-14435967	1671	0.000124124	-7.22351	0.00719283
ENSRNOT00000074595	Glyctk-201	8:114848083-114853103	1976	0.000124277	-3.75313	0.00719683
ENSRNOT00000027411	Wdr6-201	8:117358786-117366096	4495	0.000125543	-5.20605	0.00724546
ENSRNOT00000012978	Nelfb-201	3:2414450-2431148	2545	0.000127121	-3.11342	0.00733156
ENSRNOT00000078080	Cyp2e1-202	1:213511873-213535542	2014	0.000128725	-6.11961	0.00739902
ENSRNOT00000049520	Gm5471-201	5:21043449-21043791	342	0.000130082	-14.8815	0.00746185
ENSRNOT00000023274	Cdk11b-201	5:173052062-173078046	2539	0.000130611	-2.31503	0.00748213
ENSRNOT00000068764	Fbxo31-201	19:53487618-53625673	1736	0.000130811	-2.54967	0.00748854
ENSRNOT00000031464	Cmss1-201	11:45304067-45330481	970	0.000131107	25.539	0.00750043
ENSRNOT00000061249	RGD1311345-201	17:6683151-6690723	2554	0.00013188	-3.00222	0.00752946
ENSRNOT00000013244	Me1-201	8:94256838-94352246	2995	0.000133382	-3.68078	0.00759484
ENSRNOT00000007789	Nnmt-201	8:52925174-52937972	1073	0.000135405	-2.39635	0.00767912
ENSRNOT00000077784	Kif1b-201	5:165938575-165999203	3270	0.000135494	-9.00531	0.00767912
ENSRNOT00000009894	Nfkbia-201	6:76267227-76270457	1565	0.000136521	2.60132	0.00772186
ENSRNOT00000090262	Rpa1-202	10:62140422-62191512	2862	0.00013731	-3.338	0.00775107
ENSRNOT00000072592	Nrtn-201	9:10305469-10306597	671	0.000139384	23.4586	0.00784208
ENSRNOT00000041306	AABR07048992.1-201	5:99031012-99033107	2095	0.000140215	-6.11982	0.00788146
ENSRNOT00000090238	Scap-202	8:118570568-118628651	4160	0.000143298	-6.8411	0.00800936
ENSRNOT00000061569	Ndufaf6-201	5:24297093-24320786	1092	0.000146748	14.4999	0.00816464
ENSRNOT00000093210	Rpl13a-203	1:101120691-101123399	832	0.000151196	4.96334	0.00837921
ENSRNOT00000039002	Slc38a2-201	7:138088648-138100841	4635	0.000152544	2.72885	0.0084372
ENSRNOT00000020587	Acsm2-201	1:189289956-189329007	2426	0.000153557	-2.57153	0.00847691
ENSRNOT00000067165	Kyat3-201	2:248649440-248690089	1365	0.000157049	-2.43449	0.00864666
ENSRNOT00000001872	Plbd2-201	12:41600004-41619186	2190	0.00015713	-2.63122	0.00864666
ENSRNOT00000018252	Gadd45g-201	17:13391466-13393243	1090	0.000165478	-3.14765	0.00904697
ENSRNOT00000016540	Thrsp-201	1:162381252-162385575	1232	0.000166172	-2.46586	0.00907321
ENSRNOT00000009562	RGD1311251-201	8:57983555-58011962	1398	0.000168964	-3.31605	0.00917853
ENSRNOT00000087413	Klc4-202	9:16647597-16661464	2425	0.000171911	-3.01573	0.00932675
ENSRNOT00000013398	Pacsin2-201	7:124225254-124317379	2049	0.000172468	-9.83204	0.00935097
ENSRNOT00000068274	Suclg2-201	4:127552100-127824970	2219	0.000173085	-2.50801	0.00937844
ENSRNOT00000037564	Pex11g-201	12:2000426-2007516	1152	0.000175335	-2.58599	0.00948177
ENSRNOT00000075083	LOC100911417-201	2:208566384-208577146	1206	0.000175438	-2.46578	0.00948177
ENSRNOT00000051640	Pnkp-201	1:100853905-100858917	1665	0.000179443	-8.52199	0.00965529
ENSRNOT00000028496	Slc25a39-201	10:90351899-90356242	1445	0.000182155	-2.57486	0.00978269
ENSRNOT00000049914	Hoga1-201	1:261291869-261318984	1771	0.000184065	-2.46714	0.009879
ENSRNOT00000011921	Ino80b-201	4:113954612-113957774	1142	0.000186237	-2.60421	0.00997041
ENSRNOT00000008932	Grpel1-201	14:79458962-79464770	960	0.000187198	-2.00852	0.0100022
ENSRNOT00000017239	Wdr61-201	8:59296345-59313521	1204	0.00019296	-2.57329	0.0102474
ENSRNOT00000047820	AABR07070043.1-201	8:45561389-45562574	1185	0.000194426	-4.55236	0.0103043
ENSRNOT00000001360	Tsc22d1-201	15:58654912-58658153	1672	0.000195915	-2.64132	0.0103646
ENSRNOT00000093365	Ass1-202	3:10327416-10375826	1651	0.000200207	-4.03102	0.010572
ENSRNOT00000010545	Pdhb-201	15:18540912-18546854	1786	0.000200846	-2.57819	0.0105926
ENSRNOT00000073492	Eif6-201	3:151356867-151363115	1224	0.00020427	-2.29278	0.0107531
ENSRNOT00000023835	Akr1c14-201	17:69806064-69827112	2332	0.00020579	-2.78258	0.0108197
ENSRNOT00000089050	5_8S_rRNA.2-201	1:11906440-11906593	153	0.000209181	-4.97358	0.0109709
ENSRNOT00000021920	Atp5pb-201	2:208408889-208420163	1206	0.000210028	-2.46204	0.0110018
ENSRNOT00000051751	Itih1-201	16:7012353-7026540	2944	0.000213267	-2.86594	0.0111343
ENSRNOT00000024349	Ssu72-201	5:173152963-173182719	1038	0.00021555	-2.17253	0.0112357
ENSRNOT00000025403	Slc16a13-201	10:56827593-56831243	1903	0.000218232	-3.92064	0.0113455
ENSRNOT00000015575	Ube2r2-201	5:57472314-57530987	1346	0.000219002	-2.43934	0.0113738
ENSRNOT00000016984	Vamp5-201	4:100231560-100232559	306	0.000222298	-33.9737	0.0115239
ENSRNOT00000001261	Polr1d-201	12:9693778-9727489	950	0.00022531	-2.28372	0.0116729
ENSRNOT00000017942	Myg1-201	7:143929661-143936864	1162	0.000225843	6.77069	0.0116863
ENSRNOT00000023161	Med10-201	1:36107231-36112993	945	0.000227031	-2.00878	0.0117359
ENSRNOT00000089759	Mrfap1-201	14:78973363-78975166	1554	0.000230401	-2.71173	0.0118572
ENSRNOT00000079539	Ldhd-202	19:43838086-43841795	1719	0.000231399	-2.44339	0.0119014
ENSRNOT00000005781	Glrx5-201	6:128750794-128760880	2149	0.00023327	-2.15748	0.0119842
ENSRNOT00000054944	Aspscr1-201	10:109852035-109888623	1401	0.000235839	-2.11598	0.0120828
ENSRNOT00000082996	LOC103692173-202	4:113951869-113954297	1308	0.000238808	-2.0769	0.0122086
ENSRNOT00000073247	Gpx1-201	8:117117429-117118522	873	0.000241729	-5.23407	0.0123431
ENSRNOT00000026390	LOC100911881-201	1:214476386-214511529	1493	0.000243703	-2.14334	0.0124216
ENSRNOT00000092663	Srsf3-203	20:6288266-6296790	1917	0.000245171	-2.71772	0.0124814
ENSRNOT00000042264	AABR07036375.1-201	12:40685889-40686249	360	0.000246841	-15.4432	0.0125514
ENSRNOT00000088449	Pigr-203	13:47572218-47591596	3240	0.000248659	-11.2213	0.0126287
ENSRNOT00000088016	Xpnpep1-202	1:273708211-273758442	2609	0.000251175	-6.37952	0.012711
ENSRNOT00000028767	Bola1-201	2:198338113-198339130	746	0.000253	-10.1395	0.012773
ENSRNOT00000025828	Rab18-201	17:59844780-59876164	1740	0.00025328	-2.85447	0.0127795
ENSRNOT00000010369	Lactb2-201	5:4982347-5005109	1201	0.000254084	-2.88495	0.0128125
ENSRNOT00000008966	Trap1-201	10:11724031-11757681	2235	0.000255622	-3.27107	0.0128824
ENSRNOT00000018776	Lcn2-201	3:11414185-11417546	889	0.000258868	-3.96052	0.0130306
ENSRNOT00000057177	Pld3-201	1:84339260-84353725	2108	0.0002615	-3.98248	0.0131165
ENSRNOT00000009683	Nr0b2-201	5:151776003-151779319	1111	0.000263107	-3.42151	0.0131893
ENSRNOT00000075544	Mettl1-201	7:70328390-70333166	2083	0.000263519	-5.95624	0.0132017
ENSRNOT00000024066	Sirt5-201	17:23986757-24013881	1604	0.000263884	-2.84015	0.0132017
ENSRNOT00000023535	Itm2c-201	9:92916468-92930279	1921	0.000264188	-2.57891	0.0132046
ENSRNOT00000013738	Tmem9-201	13:52854030-52871297	1449	0.000264537	-3.67091	0.0132143
ENSRNOT00000004323	Mgat4b-201	10:35726543-35736338	2395	0.000266342	-2.20203	0.0132593
ENSRNOT00000086491	Dipk2a-202	8:102140712-102159828	4023	0.000270319	3.00065	0.0134086
ENSRNOT00000008980	Dld-201	6:50597676-50618694	2610	0.000275426	-3.26287	0.0136143
ENSRNOT00000046240	Calm2-202	15:65506873-65507968	1095	0.000275658	-2.16414	0.0136179
ENSRNOT00000005648	Zfp386-201	6:143901319-143915944	1872	0.000276584	3.28113	0.0136557
ENSRNOT00000041798	Bcl7b-201	12:24543758-24556976	1617	0.000279253	-2.90708	0.013757
ENSRNOT00000017323	Eefsec-201	4:120194861-120390164	2115	0.000280502	-3.48817	0.0138011
ENSRNOT00000065211	Hdgf-202	2:187281999-187284281	1260	0.000281859	-16.9589	0.0138598
ENSRNOT00000008238	Ppm1a-201	6:94429067-94484351	1804	0.000291502	-12.138	0.0141945
ENSRNOT00000021862	Tkt-201	16:6609667-6634595	2077	0.000292134	-2.04554	0.0142171
ENSRNOT00000044690	Irx1-201	1:33910911-33916741	2345	0.000292399	-3.15299	0.0142219
ENSRNOT00000079310	LOC100361457-201	3:75643053-75644954	1901	0.000293738	-2.62984	0.0142788
ENSRNOT00000011592	Cdk16-201	X:1708277-1714061	1748	0.000295592	-4.10524	0.0143299
ENSRNOT00000023984	Itih3-201	16:6992170-7007051	2664	0.000296572	-2.25465	0.0143674
ENSRNOT00000005641	Pdk2-201	10:82839152-82852660	1224	0.000301797	-3.09708	0.0145872
ENSRNOT00000027615	Slc25a42-201	16:20962226-20985225	2805	0.000303234	-2.72272	0.0146484
ENSRNOT00000008503	Aifm1-201	X:135304078-135343087	2098	0.000308544	-3.25238	0.0148207
ENSRNOT00000004520	Actr3-201	13:41695520-41738622	2089	0.000312099	-3.31088	0.0149715
ENSRNOT00000072581	LOC681367-201	9:16518799-16519144	345	0.000316263	-2.90084	0.0151317
ENSRNOT00000017042	Lgals9-201	10:64737087-64759787	1070	0.000319469	-2.58893	0.0152422
ENSRNOT00000020972	Ctbs-201	2:252305873-252320387	1616	0.000320724	2.01842	0.015285
ENSRNOT00000045401	AABR07035539.1-201	12:19159467-19159901	434	0.000321319	-4.41747	0.0152962
ENSRNOT00000013569	Bpgm-201	4:61912209-61940696	1575	0.000321891	9.92045	0.0153148
ENSRNOT00000032865	Lyplal1-201	13:104049385-104080631	1324	0.000323094	-3.25693	0.0153635
ENSRNOT00000013375	Eif2s1-201	6:102048371-102073041	1377	0.000326702	-2.74343	0.0155004
ENSRNOT00000024866	Colgalt1-201	16:20039968-20052276	3012	0.000334014	-6.73824	0.0157618
ENSRNOT00000021899	Mrps9-201	9:49647256-49704828	1402	0.000334064	-21.4878	0.0157618
ENSRNOT00000022342	Ctsc-201	1:151918570-151949983	1874	0.000342028	-3.42327	0.0160574
ENSRNOT00000019104	Psmd7-201	19:39639430-39646693	1564	0.000346973	-2.46902	0.0162716
ENSRNOT00000028525	Arl2-201	1:221504171-221516110	871	0.000351507	-2.42412	0.0164389
ENSRNOT00000085636	Fdxr-201	10:103817703-103826448	1841	0.000352844	-3.40051	0.0164879
ENSRNOT00000020740	Acot8-201	3:161259734-161272460	2546	0.000353047	-2.72459	0.0164879
ENSRNOT00000024253	Mfge8-201	1:140845478-140860882	2002	0.000355767	-3.6587	0.0165925
ENSRNOT00000014465	Cpa1-201	4:57952981-57959109	1633	0.000356107	8.55021	0.0165993
ENSRNOT00000004370	Farsa-201	19:25969254-25978776	1793	0.000357359	-2.4069	0.0166394
ENSRNOT00000055281	Nfe2-201	7:144872746-144880092	1652	0.00036588	-3.76098	0.016999
ENSRNOT00000086343	Gck-202	14:86148927-86164341	2534	0.000366929	-3.5899	0.0170383
ENSRNOT00000077502	Kmt2d-201	7:140489491-140546908	18521	0.000368739	11.7823	0.0170851
ENSRNOT00000050010	UST4r-201	1:224319917-224389499	1896	0.00037017	-2.85763	0.0171421
ENSRNOT00000050156	Mt-co1-201	MT:5322-6867	1545	0.000370388	2.35722	0.0171428
ENSRNOT00000020402	Sae1-201	1:78277514-78333321	1937	0.000371273	-3.50134	0.0171745
ENSRNOT00000026396	Rhbg-201	2:187610086-187622373	1689	0.000372168	-2.46564	0.0172065
ENSRNOT00000042114	Uqcrc1-201	8:117679277-117691071	1615	0.000372912	-2.85671	0.0172315
ENSRNOT00000024392	Gpat4-201	16:73615948-73649767	3135	0.000373454	-3.15642	0.0172472
ENSRNOT00000018918	Clybl-201	15:108608203-108838235	1239	0.000373989	-2.4774	0.0172625
ENSRNOT00000074457	Aplp2-202	8:32299769-32328819	2157	0.000374778	-3.43535	0.0172802
ENSRNOT00000052157	Naglu-201	10:88979382-88986867	2458	0.000375491	-4.35249	0.0172943
ENSRNOT00000015233	Micu2-201	15:38191508-38276159	2330	0.000378712	-4.19555	0.0174144
ENSRNOT00000026960	Sgta-201	7:11521997-11539319	2620	0.000379128	-2.66927	0.0174241
ENSRNOT00000025433	Psmd5-201	3:13916202-13933658	2213	0.000380359	-2.19856	0.0174713
ENSRNOT00000079504	AABR07030184.1-201	10:74765384-74765600	216	0.000381429	-20.9344	0.0175109
ENSRNOT00000031842	Ppm1g-201	6:26517839-26537290	2160	0.000385788	-4.23213	0.0176919
ENSRNOT00000070892	Sepsecs-201	14:60657685-60687958	3586	0.00038676	-2.3003	0.0177174
ENSRNOT00000016593	Glyatl2-201	1:229519505-229552842	1959	0.000387815	-2.15262	0.0177562
ENSRNOT00000000477	Cfb-205	20:4536211-4542073	2554	0.000391538	-7.3388	0.0178978
ENSRNOT00000011665	Cbx1-201	10:84669913-84675741	558	0.000394628	-26.0324	0.0179907
ENSRNOT00000081405	Pex13-201	14:108394302-108412823	2556	0.000394962	-5.85108	0.0179962
ENSRNOT00000025626	Ccdc124-201	16:20317445-20323265	1607	0.000397489	-3.88887	0.0181017
ENSRNOT00000025990	Tmem53-201	5:136112416-136127976	1309	0.000400183	-2.51909	0.0182147
ENSRNOT00000057504	Rarres1-201	2:164650721-164684985	1335	0.000403292	2.07145	0.0183365
ENSRNOT00000003219	Scpep1-201	10:76230372-76263866	2016	0.000406559	-2.36763	0.0184362
ENSRNOT00000079074	Rnu3a-201	20:45357178-45357393	215	0.000410436	-22.4263	0.0185765
ENSRNOT00000024352	Ubac1-201	3:3453400-3476215	1803	0.00042084	-3.49166	0.0189721
ENSRNOT00000009096	Rdh10-201	5:2603504-2632030	2946	0.000426198	-3.04661	0.0191335
ENSRNOT00000087065	Bub3-202	1:203526849-203537563	1441	0.000428336	-2.09137	0.0192083
ENSRNOT00000024000	Aldh1a1-201	1:238222520-238264330	2205	0.000431345	-2.02985	0.0193229
ENSRNOT00000023736	Cdc16-201	16:81493354-81516493	2237	0.000435729	-3.88697	0.0194885
ENSRNOT00000037072	Tmem98-201	10:68173368-68184320	1453	0.000436805	-2.62857	0.0195162
ENSRNOT00000091609	Zscan26-202	17:45188247-45207065	4082	0.000440636	2.58459	0.0196562
ENSRNOT00000013257	Hgfac-201	14:80966902-80973456	2041	0.000443519	-5.93867	0.0197435
ENSRNOT00000016871	Ostf1-201	1:234749567-234796739	1174	0.000459686	-2.03428	0.0203354
ENSRNOT00000058092	Ap2m1-201	11:84041183-84047546	1800	0.000462326	11.8637	0.0204236
ENSRNOT00000001467	Denr-201	12:38096033-38116919	582	0.000464348	-2.77944	0.0204864
ENSRNOT00000015757	Psmc3-201	3:79876937-79882319	1626	0.000467474	-2.19618	0.020573
ENSRNOT00000087928	Aldoa-202	1:198228386-198233215	1340	0.000468555	-4.70905	0.0206023
ENSRNOT00000013785	Pgm1-201	5:118743631-118803055	2280	0.000468866	-2.6409	0.0206023
ENSRNOT00000021430	Lpar6-201	15:55126952-55128761	1809	0.000473361	2.25328	0.0207768
ENSRNOT00000085131	Zfand3-201	20:8696435-8892569	2590	0.000473571	-2.03531	0.0207768
ENSRNOT00000068093	Snrnp27-202	4:118478074-118487633	873	0.000490432	-2.1627	0.0213351
ENSRNOT00000013043	Nampt-201	6:52122084-52156472	2562	0.000494563	-2.62231	0.0214763
ENSRNOT00000048739	Fetub-201	11:81648884-81660395	1527	0.000502466	-2.8236	0.0216976
ENSRNOT00000004662	Apoa2-201	13:89597137-89598802	440	0.000513522	-83.4193	0.0220965
ENSRNOT00000017629	Mmp15-201	19:10079764-10101451	4005	0.000520391	-3.79919	0.0222906
ENSRNOT00000049745	Cfap410-201	20:11417428-11424324	1786	0.000520843	-3.33332	0.0222987
ENSRNOT00000064572	Agfg2-201	12:22082064-22118220	2742	0.000522389	-2.55064	0.0223537
ENSRNOT00000006188	Myc-201	7:102586312-102591240	2342	0.000529435	-4.54949	0.0225983
ENSRNOT00000012447	Galk2-201	3:118144595-118268836	1772	0.000531968	-3.04674	0.0226734
ENSRNOT00000007698	Gadd45a-201	4:97782511-97784842	1241	0.000531992	-7.8624	0.0226734
ENSRNOT00000009261	Wasl-201	4:51677721-51726212	4355	0.00053385	-4.50501	0.0227298
ENSRNOT00000082066	Amfr-201	19:11473540-11508102	1890	0.000536335	-3.94653	0.022798
ENSRNOT00000064661	Tarbp2-201	7:144121743-144126857	1469	0.000542688	-2.88741	0.022991
ENSRNOT00000045867	Ccl6-201	10:70797123-70802782	1374	0.00054449	7.83075	0.0230559
ENSRNOT00000072271	Znrf2-201	4:85009349-85090914	5774	0.00055253	2.70094	0.0233035
ENSRNOT00000027064	Gmppa-201	9:82632383-82639810	1637	0.000558181	-3.18583	0.0234953
ENSRNOT00000091000	Rcbtb2-202	15:55043607-55073437	2053	0.000559791	-4.63031	0.0235514
ENSRNOT00000004878	Ubxn4-201	13:44957013-44990535	3325	0.00056171	-2.02099	0.0235971
ENSRNOT00000000106	Gpr89b-201	2:198999945-199038702	1786	0.000570067	-3.51119	0.0238455
ENSRNOT00000019219	Foxa3-201	1:79920751-79930263	2080	0.000583884	16.457	0.0243721
ENSRNOT00000004351	Slc9a3r1-201	10:103713044-103730145	1492	0.000587971	-32.1051	0.0245067
ENSRNOT00000038383	Acad11-201	8:112594690-112676280	3521	0.0006089	-2.5982	0.0252221
ENSRNOT00000009122	Synj2bp-201	6:105224165-105261549	5811	0.000608989	5.47997	0.0252221
ENSRNOT00000038817	Itih2-201	17:72160734-72195509	2802	0.000613854	-3.45368	0.0253988
ENSRNOT00000075796	Gaa-201	10:108395859-108413059	3555	0.000626189	-3.62187	0.0258403
ENSRNOT00000009482	Rrs1-201	5:9430727-9432343	1616	0.000650091	-2.78645	0.0266519
ENSRNOT00000019192	Hmox1-201	19:14508615-14515456	1566	0.000650688	-2.48891	0.0266635
ENSRNOT00000009009	Dnajc9-201	15:4356260-4360564	1640	0.000656557	-3.64804	0.0268136
ENSRNOT00000013963	Ccdc32-201	3:110816336-110828879	2362	0.000658624	-7.31614	0.0268851
ENSRNOT00000075878	RGD1565355-204	4:14039976-14241272	2598	0.000668738	-3.84996	0.0272066
ENSRNOT00000023900	Mccc2-201	2:30175017-30246010	2143	0.000678309	-2.49465	0.0275564
ENSRNOT00000015299	Tmem30a-201	8:87223947-87245951	1753	0.000689028	-15.4427	0.0279385
ENSRNOT00000070805	Tomm6-201	9:15313522-15314435	225	0.00070319	-56.0551	0.0284449
ENSRNOT00000076110	Pdzd11-204	X:70459306-70461553	448	0.00070568	-5.00665	0.0284923
ENSRNOT00000046313	Arntl-201	1:178039062-178137465	2973	0.000712912	4.93123	0.0287289
ENSRNOT00000029435	Hsp90b1-201	7:27226568-27240528	2799	0.00071733	-4.60862	0.0288523
ENSRNOT00000072679	Uqcc1-201	3:151384953-151474135	2424	0.00071873	-2.64092	0.0288908
ENSRNOT00000026711	Mst1-201	8:116857683-116862423	2460	0.000718968	-2.0354	0.0288908
ENSRNOT00000010271	Pnrc1-201	5:48501471-48504511	1610	0.000720656	3.1282	0.0289342
ENSRNOT00000040278	Rps10l1-201	10:19715274-19715832	558	0.000724108	-2.23626	0.0290015
ENSRNOT00000061235	Smim11a-201	11:32450586-32460238	499	0.000724459	19.7807	0.0290019
ENSRNOT00000074842	LOC100911107-201	17:32066212-32076181	1122	0.000725865	-7.83054	0.0290351
ENSRNOT00000018454	Sec61a1-201	4:120453580-120467932	3032	0.000750953	-3.20395	0.0298239
ENSRNOT00000058423	Ndufs2-201	13:89606839-89619398	1607	0.000764207	-3.29107	0.0302796
ENSRNOT00000090875	Ruvbl1-202	4:120411990-120447455	1578	0.000769731	-2.48791	0.0304701
ENSRNOT00000071590	Apoo-201	X:63520990-63625134	932	0.000774888	-2.48582	0.0306172
ENSRNOT00000088575	Alg5-201	2:143932738-143946466	1424	0.000791215	3.84724	0.0311755
ENSRNOT00000070903	RT1-T24-3-201	20:3226359-3233694	1216	0.000793408	-3.21627	0.0312185
ENSRNOT00000090121	Cwf19l2-202	6:18970563-19055924	2946	0.000802375	-5.26766	0.0314985
ENSRNOT00000081375	Rbpms2-202	8:71168096-71200536	2212	0.000809585	-3.14626	0.0316864
ENSRNOT00000090884	Nsun2-202	1:36297763-36319966	2620	0.000813921	-3.50458	0.0317974
ENSRNOT00000002331	Alg3-201	11:83986229-83991706	1421	0.000814848	-2.9637	0.0317974
ENSRNOT00000028740	Ecm1-201	2:197855459-197860699	1961	0.000816514	-2.63209	0.0318478
ENSRNOT00000084372	Slc23a1-202	18:28414008-28425944	2277	0.000817823	-9.66776	0.0318696
ENSRNOT00000026792	Actr1a-201	1:266123869-266142538	2767	0.000820031	-10.3102	0.0319118
ENSRNOT00000047047	Manbal-201	3:153491150-153520735	1083	0.000837694	5.18144	0.0325098
ENSRNOT00000046598	Slco1a4-202	4:175969548-176026163	3622	0.000838623	-3.0838	0.0325098
ENSRNOT00000089847	Dkc1-202	X:155844913-155862363	1803	0.000848037	-2.14834	0.0327619
ENSRNOT00000024176	Aph1b-201	8:72608219-72629265	1281	0.000862829	-2.32824	0.0332729
ENSRNOT00000009100	Ddx1-201	6:38422887-38453797	2502	0.000863617	-3.80209	0.0332882
ENSRNOT00000032236	Rgs16-201	13:71179909-71185216	2462	0.000878306	-5.37741	0.0337778
ENSRNOT00000080335	F13b-202	13:56598978-56622782	1986	0.00089869	-3.2978	0.0344217
ENSRNOT00000088416	Gsta3-202	9:27408332-27417023	1146	0.000901144	-2.07214	0.0344946
ENSRNOT00000089125	LOC103694855-201	AABR07024041.1:23531-31048	683	0.000901403	-4.05126	0.0344946
ENSRNOT00000064190	Stard3-201	10:86313382-86335923	2098	0.000905019	-3.39228	0.0346174
ENSRNOT00000022095	Clu-201	15:42653147-42665857	1644	0.00091997	-2.29188	0.0350946
ENSRNOT00000067172	Mrpl46-201	1:140469279-140477796	1583	0.000925985	-2.37974	0.0352804
ENSRNOT00000088928	Entpd4-202	15:51222983-51250754	3081	0.000930758	-4.92818	0.0354109
ENSRNOT00000027860	Htra1-201	1:201499027-201548513	2056	0.00093732	-2.37637	0.0356286
ENSRNOT00000088001	LOC100912405-201	8:38545714-38549268	526	0.000938032	-14.3225	0.0356398
ENSRNOT00000093512	LOC108348190-204	2:235049692-235052464	769	0.000950877	2.72611	0.0359512
ENSRNOT00000061041	AC094217.1-201	1:31527645-31528083	438	0.00095926	-4.43172	0.0362038
ENSRNOT00000017409	Eif3m-201	3:94990067-95007712	1299	0.000961401	-2.18011	0.0362685
ENSRNOT00000012287	Cops2-201	3:118110704-118137125	2067	0.000961913	-3.61187	0.0362717
ENSRNOT00000091242	Phykpl-202	10:37032055-37051519	1588	0.000962898	-5.17627	0.0362927
ENSRNOT00000081707	Mkln1-201	4:58693383-58817691	2202	0.000965212	-3.29465	0.0363639
ENSRNOT00000026921	Stub1-201	10:15197802-15200117	1299	0.000979846	-2.0065	0.0367042
ENSRNOT00000064715	Mtx1-201	2:188522605-188528127	1447	0.000982534	-4.26932	0.0367042
ENSRNOT00000079795	Abcg3l1-202	14:6488659-6533524	1938	0.000984169	18.6041	0.0367042
ENSRNOT00000082138	Ubr4-202	5:157848210-157956132	15961	0.000984169	10.8173	0.0367042
ENSRNOT00000019181	Lrp11-201	1:1702695-1731210	3269	0.000994092	-11.0717	0.036977
ENSRNOT00000072245	Ebna1bp2-201	5:137670122-137674802	1223	0.000995251	-4.87835	0.0370039
ENSRNOT00000002134	Mtx2-201	3:61756147-61818998	1212	0.000997385	-2.32473	0.0370509

## Sheet: CT vs. H60
The known differentially expressed mRNA isoforms (P < 0.001, FDR < 0.05, |FC| > 2) identified in liver in CT vs. H60.
Transcript ID	Transcript Name	Position	Transcript length (bp*)	P-value	FC	FDR
ENSRNOT00000092476	Rps18-204	20:5441875_5445550	544	0	-3.08292	0
ENSRNOT00000068323	Rps28-201	7:18682070_18683440	339	0	-3.13	0
ENSRNOT00000051693	AC141489.1-201	5:159606646_159606989	343	0	-3.28537	0
ENSRNOT00000048198	LOC108348287-201	18:1504177_1505570	493	0	-2.7559	0
ENSRNOT00000032015	Ifi27l2b-201	6:127336304_127337791	451	0	-5.72948	0
ENSRNOT00000074685	Dbi-202	13:36147667_36156076	565	1.03467e-89	-4386.08	1.54071e-85
ENSRNOT00000024678	Rps15a-201	1:187759900_187765744	393	9.4507e-79	937.203	1.20625e-74
ENSRNOT00000090272	Rnase4-202	15:28023017_28034590	539	2.77783e-38	1202.81	3.10232e-34
ENSRNOT00000057158	AABR07071891.1-201	1:84573495_84573959	464	1.13714e-35	-6.22444	1.12886e-31
ENSRNOT00000037043	LOC100362366-201	3:24600602_24601063	461	6.14832e-35	-10.4273	4.99384e-31
ENSRNOT00000085653	Pgk1-202	X:77278239_77279367	567	7.09347e-31	-80.9683	4.87512e-27
ENSRNOT00000000673	Ppa1-201	20:31298268_31310674	2625	1.59259e-29	-153.329	1.01636e-25
ENSRNOT00000012240	Sec62-201	2:116189861_116219750	1818	5.2605e-27	-311.153	2.7647e-23
ENSRNOT00000016036	Lifr-201	2:56426366_56489415	5388	2.43676e-23	26.3163	9.89603e-20
ENSRNOT00000005837	Phf5a-201	7:123095287_123101869	873	1.39827e-22	190.157	5.20537e-19
ENSRNOT00000019923	Mlycd-201	19:52032885_52048753	2055	1.34972e-20	150.045	4.0197e-17
ENSRNOT00000011907	Chmp5-201	5:57267311_57284448	1320	1.55789e-20	142.308	4.48998e-17
ENSRNOT00000073160	Rps19l2-202	9:16802318_16807966	474	4.10693e-20	12.3416	1.11192e-16
ENSRNOT00000082300	Hspe1-201	9:61692153_61694599	267	1.59046e-19	-447.338	4.06e-16
ENSRNOT00000037030	Uqcrb-201	7:71264513_71269869	1029	5.61549e-19	-2.67258	1.28645e-15
ENSRNOT00000068078	Sat1-201	X:43626479_43629765	1164	2.31202e-18	-70.1799	4.91827e-15
ENSRNOT00000003658	Nme1-201	10:81657152_81666523	736	3.41588e-18	-3.31855	6.93618e-15
ENSRNOT00000041984	LOC100360117-201	3:3389611_3390443	832	8.28505e-18	-3.40009	1.60919e-14
ENSRNOT00000088049	Scp2-203	5:127648554_127735739	2052	1.45937e-17	-8.09567	2.71641e-14
ENSRNOT00000091288	Ndufa3-201	1:64172539_64175099	276	1.87157e-17	-3.41859	3.41256e-14
ENSRNOT00000000553	Pfdn6-201	20:5455973_5457444	584	3.61904e-17	-7.35162	6.46686e-14
ENSRNOT00000007371	Apob-201	6:33176825_33216378	14073	4.055e-17	23.8868	7.10381e-14
ENSRNOT00000028102	Tkfc-201	1:226644199_226657408	2369	8.21276e-17	-5.88178	1.35883e-13
ENSRNOT00000022495	Phpt1-201	3:2796996_2798470	635	1.74189e-16	-2.81664	2.7791e-13
ENSRNOT00000028767	Bola1-201	2:198338113_198339130	746	2.21953e-16	-216.676	3.30506e-13
ENSRNOT00000075493	Fabp5-201	2:93981655_93985378	723	4.3263e-16	-10.0222	5.94667e-13
ENSRNOT00000005577	LOC108352650-201	6:91455332_91456696	305	4.44089e-16	-3.9406	6.01169e-13
ENSRNOT00000001201	Hsph1-201	12:6322667_6341902	3446	6.39575e-16	14.2098	8.52878e-13
ENSRNOT00000008325	Ndufa5-201	4:51590412_51598771	546	8.04732e-16	-2.40454	1.04201e-12
ENSRNOT00000033537	Atp5mf-201	12:11191811_11198369	419	1.33227e-15	-2.16819	1.65321e-12
ENSRNOT00000027616	Bag3-201	1:199941160_199965191	2425	2.12511e-15	13.1849	2.60094e-12
ENSRNOT00000014397	RGD1561590-201	15:38069319_38073622	759	2.48389e-15	-3.35642	2.95898e-12
ENSRNOT00000013841	Sem1-201	4:32067443_32087600	753	2.54678e-15	-2.46317	2.99397e-12
ENSRNOT00000044582	Mt-nd4l-201	MT:9869_10166	297	2.68054e-15	4.57765	3.1103e-12
ENSRNOT00000076976	Gmps-202	2:154580557_154590662	667	2.96604e-15	-125.537	3.39744e-12
ENSRNOT00000017486	Sparc-201	10:40742399_40764185	2063	3.35806e-15	152.321	3.7978e-12
ENSRNOT00000028143	Pten-201	1:251421595_251487832	1628	3.41255e-15	94.8088	3.81118e-12
ENSRNOT00000009621	Churc1-201	6:99817430_99831576	471	7.98542e-15	-3.50624	8.39361e-12
ENSRNOT00000066084	Cox7a2l2-201	8:87209529_87213627	478	1.31006e-14	-2.35076	1.31817e-11
ENSRNOT00000022487	Cox5b-201	9:43259708_43262040	484	1.31006e-14	-2.57862	1.31817e-11
ENSRNOT00000036993	Adh6-201	2:243656578_243687857	1854	1.60325e-14	4.03861	1.59158e-11
ENSRNOT00000047634	Zfand2a-201	12:17252092_17263477	3194	1.68192e-14	72.5078	1.65133e-11
ENSRNOT00000003611	Nme2-201	10:81648215_81653717	746	2.02061e-14	-2.1599	1.96229e-11
ENSRNOT00000079106	Dnajb1-202	19:24747215_24750904	2191	2.16052e-14	17.9205	2.07561e-11
ENSRNOT00000085692	Ubc-201	12:36638456_36642734	2545	3.31543e-14	3.36433	3.02262e-11
ENSRNOT00000083677	Zfp36l1-201	6:103308044_103313074	2728	3.78737e-14	4.31235	3.35998e-11
ENSRNOT00000016458	Gchfr-201	3:110975922_110979957	631	3.79597e-14	-2.9484	3.35998e-11
ENSRNOT00000051134	LOC100361854-201	X:115495697_115496045	348	3.79829e-14	-3.64444	3.35998e-11
ENSRNOT00000000072	Atp5me-201	14:2325307_2326436	289	1.11398e-13	-6.21196	9.13108e-11
ENSRNOT00000050204	AABR07065438.1-201	6:128738387_128739319	932	1.20701e-13	-4.71992	9.71535e-11
ENSRNOT00000012616	Ndufb9-201	7:98813039_98819452	704	1.68532e-13	-2.17569	1.30935e-10
ENSRNOT00000016965	Ndufv2-201	9:113875702_113900190	889	2.61677e-13	-2.15487	1.94829e-10
ENSRNOT00000064340	Gk-202	X:54227396_54303825	4107	3.30602e-13	15.8467	2.44113e-10
ENSRNOT00000087664	Pigr-202	13:47572220_47591699	3509	3.40722e-13	54.3323	2.49523e-10
ENSRNOT00000009611	Ttpa-201	5:34007919_34028452	2120	4.3998e-13	2.68247	3.11985e-10
ENSRNOT00000029279	Lamtor4-201	12:19573908_19577624	605	6.30205e-13	-2.04744	4.33121e-10
ENSRNOT00000024106	Eno1-201	5:167288716_167299609	1730	6.76338e-13	-2.01645	4.57784e-10
ENSRNOT00000016751	Uqcrh-201	5:134919043_134927235	547	7.11874e-13	272.371	4.77767e-10
ENSRNOT00000043610	AC099453.1-201	5:78392714_78393143	429	7.16557e-13	-9.74528	4.77767e-10
ENSRNOT00000051895	Cox7c-201	2:14699881_14701903	474	8.70193e-13	-2.94835	5.75906e-10
ENSRNOT00000050931	Snrpg-201	1:91588227_91588609	382	1.09103e-12	-65.1127	6.91336e-10
ENSRNOT00000067085	Cd59-201	3:94010474_94028621	1484	1.46783e-12	159.101	9.17088e-10
ENSRNOT00000023526	Ndufs8-201	1:219141291_219144610	748	1.58199e-12	17.3418	9.81548e-10
ENSRNOT00000009815	Atp5mc1-201	10:83895946_83898527	561	2.03282e-12	-3.1252	1.21894e-09
ENSRNOT00000019624	Ndufb10-201	10:14090127_14092289	683	2.40844e-12	-2.50066	1.40642e-09
ENSRNOT00000045156	LOC100360841-201	9:69790830_69791196	366	5.91052e-12	-6.04689	3.27997e-09
ENSRNOT00000031555	Hspb1-201	12:23839398_23841049	879	6.15414e-12	14.2425	3.39192e-09
ENSRNOT00000078657	Yif1a-202	1:220470128_220474129	1030	6.18818e-12	-59.3357	3.39192e-09
ENSRNOT00000005370	Pfn1-201	10:57273004_57275708	816	7.06502e-12	-2.31673	3.84893e-09
ENSRNOT00000092949	AC134224.3-201	1:221158097_221158792	695	7.26018e-12	-28.2274	3.93128e-09
ENSRNOT00000084069	Ndufa8-202	3:15362823_15379381	870	7.90222e-12	-3.07731	4.25316e-09
ENSRNOT00000072464	LOC100910944-201	3:152222725_152224326	404	8.08426e-12	-2.5868	4.29933e-09
ENSRNOT00000039002	Slc38a2-201	7:138088648_138100841	4635	8.21836e-12	11.5871	4.34479e-09
ENSRNOT00000075733	Phb-201	10:83476106_83488878	1739	1.49859e-11	-2.03326	7.60746e-09
ENSRNOT00000091906	Bst2-202	16:19938783_19942353	787	1.52182e-11	-2.92535	7.68175e-09
ENSRNOT00000081305	Mrps28-202	2:95045033_95173753	730	1.59987e-11	-2.45745	7.89727e-09
ENSRNOT00000034074	Mrps21-201	2:197974760_197982385	464	1.62875e-11	-2.60933	7.99566e-09
ENSRNOT00000085118	Tsc22d3-201	X:111884294_111887906	1937	1.81079e-11	9.04091	8.84071e-09
ENSRNOT00000072001	Clpp-201	9:10048885_10054359	819	1.82216e-11	82.8174	8.84786e-09
ENSRNOT00000013605	Slc27a2-201	3:119015411_119052222	1854	2.33029e-11	3.92983	1.10159e-08
ENSRNOT00000015756	Rpl22l1-201	2:115362798_115364729	560	2.83725e-11	-5.5836	1.31344e-08
ENSRNOT00000016432	Rab7a-201	4:119910477_119959173	2075	3.18271e-11	264.284	1.46577e-08
ENSRNOT00000048490	Ddx5-201	10:94980927_94988461	2380	3.51902e-11	13.5427	1.57204e-08
ENSRNOT00000057176	Pacsin3-201	3:80072488_80081033	1730	3.59643e-11	68.0968	1.59862e-08
ENSRNOT00000042661	LOC685963-201	2:199479006_199479309	303	3.66132e-11	-2.69416	1.61941e-08
ENSRNOT00000086505	Aldob-202	5:64805772_64818824	1542	3.72455e-11	-6.37853	1.63926e-08
ENSRNOT00000012141	Pdrg1-201	3:148487058_148493225	1192	4.1175e-11	62.1187	1.79453e-08
ENSRNOT00000057895	AC128960.1-201	17:78876110_78876537	427	4.32642e-11	-3.57994	1.87643e-08
ENSRNOT00000084027	Rps21-201	3:175629373_175630048	246	4.57967e-11	-2.80454	1.97667e-08
ENSRNOT00000091164	AABR07053136.1-201	3:93648342_93648657	315	4.64146e-11	-90.6028	1.98417e-08
ENSRNOT00000022000	Pdlim1-201	1:259308295_259357056	1471	5.17374e-11	-3.22166	2.19075e-08
ENSRNOT00000086530	Pex16-203	3:81287241_81292573	1221	5.37684e-11	-2.82427	2.26601e-08
ENSRNOT00000072206	LOC679739-201	1:32573227_32581781	486	5.86135e-11	-2.4614	2.4586e-08
ENSRNOT00000060160	Cfhr2-201	13:56642364_56693968	1722	5.93537e-11	9.18386	2.47802e-08
ENSRNOT00000019219	Foxa3-201	1:79920751_79930263	2080	8.444e-11	61.9759	3.41371e-08
ENSRNOT00000086310	Hsp90aa1-201	6:135107270_135112775	2758	9.76175e-11	4.70158	3.92866e-08
ENSRNOT00000011183	Ndufb11-201	X:1787265_1789524	849	1.31585e-10	-2.11401	5.06744e-08
ENSRNOT00000072795	AABR07073045.1-201	4:120413652_120414118	466	1.42219e-10	-11.7781	5.43016e-08
ENSRNOT00000017071	Lgals9-202	10:64737021_64760201	1454	2.01702e-10	-2.74361	7.60382e-08
ENSRNOT00000040261	LOC108349682-201	1:219395275_219395623	348	2.35954e-10	-3.78612	8.7426e-08
ENSRNOT00000045401	AABR07035539.1-201	12:19159467_19159901	434	2.36802e-10	-21.4888	8.7426e-08
ENSRNOT00000000101	Rfxapl1-201	2:144213402_144217600	1653	2.48583e-10	65.8481	9.13979e-08
ENSRNOT00000018169	Polr2e-201	7:12532894_12536791	1056	2.66811e-10	-2.67346	9.65112e-08
ENSRNOT00000046951	Ghr-202	2:53150369_53313884	2941	4.65629e-10	6.59189	1.61247e-07
ENSRNOT00000071424	LOC100911516-202	9:101106891_101107575	684	5.17021e-10	5.85548	1.77666e-07
ENSRNOT00000012372	Chchd1-201	15:4025462_4026637	553	5.4081e-10	-25.373	1.84422e-07
ENSRNOT00000000535	LOC108348112-201	20:5262119_5269328	3624	6.72643e-10	4.96704	2.2593e-07
ENSRNOT00000020676	Atp5mc2-201	7:144264213_144272578	617	6.88916e-10	-2.04142	2.30529e-07
ENSRNOT00000027170	Mcrip2-201	10:15230800_15235740	820	7.00434e-10	-4.01815	2.33509e-07
ENSRNOT00000074103	Cyp2c6v1-202	1:147713897_147888007	2248	7.29078e-10	2.37716	2.41257e-07
ENSRNOT00000081761	LOC108348144-201	X:123803121_123806777	429	7.4118e-10	-2.07134	2.44357e-07
ENSRNOT00000065791	Pklr-202	2:188449717_188459592	5007	7.632e-10	-5.85048	2.50692e-07
ENSRNOT00000064114	Higd1a-201	8:130482492_130491998	1524	9.62037e-10	-3.26266	3.04798e-07
ENSRNOT00000090552	Msrb1-201	10:14105749_14111463	869	1.3404e-09	-18.7334	4.1154e-07
ENSRNOT00000031586	Pck1-201	3:171213935_171219871	2621	1.41382e-09	11.5225	4.28195e-07
ENSRNOT00000057222	Rpl36a-201	X:105402866_105405580	669	1.51286e-09	-2.83154	4.55106e-07
ENSRNOT00000028988	LOC100912599-201	1:31264754_31273159	486	1.92457e-09	-2.36559	5.67495e-07
ENSRNOT00000033450	Tuba1c-201	7:140716112_140723714	1533	2.00939e-09	-2.53606	5.86696e-07
ENSRNOT00000046590	Ei24-201	8:39254888_39266959	2010	2.52333e-09	3.22741	7.29601e-07
ENSRNOT00000043822	Abcb4-203	4:22134804_22192474	3912	2.60282e-09	6.38153	7.47746e-07
ENSRNOT00000039275	Hspb8-201	12:45905370_45920013	1773	2.68712e-09	3.17375	7.6949e-07
ENSRNOT00000027734	Banf1-201	1:220744194_220746224	763	2.90477e-09	-2.23562	8.26517e-07
ENSRNOT00000021550	Id4-201	17:16692556_16695126	1626	2.92824e-09	4.03742	8.3055e-07
ENSRNOT00000035890	Ndufb7-201	19:24701048_24705405	555	2.96889e-09	-2.06123	8.39417e-07
ENSRNOT00000065962	Tomm7-201	4:7835948_7842789	376	3.26541e-09	-2.07673	9.1457e-07
ENSRNOT00000026113	AABR07006025.1-201	1:214015218_214024153	1014	4.41088e-09	-2.83888	1.20517e-06
ENSRNOT00000032026	Cox6b1-201	1:89075974_89084859	601	4.43654e-09	-2.61408	1.20848e-06
ENSRNOT00000003449	C1galt1c1-201	X:124921727_124926171	1313	4.75488e-09	8.13462	1.28735e-06
ENSRNOT00000004836	Atp5pd-201	10:103967311_103972668	794	5.06051e-09	-2.04345	1.36184e-06
ENSRNOT00000077756	Fkbp8-201	16:20645956_20652889	1651	5.09894e-09	-2.09031	1.36806e-06
ENSRNOT00000020749	Spr-201	4:116912350_116916236	1357	5.43267e-09	-2.2519	1.44459e-06
ENSRNOT00000041237	Eif1a-201	18:40586314_40597671	1827	5.81252e-09	9.30106	1.53645e-06
ENSRNOT00000057830	Commd6-201	15:86136095_86142672	909	6.26455e-09	-3.00992	1.65105e-06
ENSRNOT00000013409	Slco1b2-201	4:175814117_175881768	3211	6.4994e-09	7.12217	1.70791e-06
ENSRNOT00000039728	Ndufs7-201	7:12318756_12326392	981	6.55359e-09	-2.61895	1.7129e-06
ENSRNOT00000019556	Fam32a-201	16:19304528_19308842	1996	6.55672e-09	12.2566	1.7129e-06
ENSRNOT00000074362	Dcxr-201	10:109907758_109909646	850	6.83363e-09	-2.71161	1.78003e-06
ENSRNOT00000011230	Cat-201	3:93379873_93412058	2539	7.18655e-09	2.95879	1.86652e-06
ENSRNOT00000086232	Alas1-202	8:114927788_114940177	1969	7.42629e-09	2.52414	1.91763e-06
ENSRNOT00000015851	Acy1-201	8:115134764_115140080	1576	7.72443e-09	-2.78278	1.98316e-06
ENSRNOT00000074075	Mpnd-201	9:11055370_11061611	1545	8.44207e-09	-2.39129	2.1367e-06
ENSRNOT00000066159	Rpl41-201	7:2972899_2973977	443	9.10081e-09	-2.04042	2.27762e-06
ENSRNOT00000085092	Naca-203	7:2458832_2470674	887	1.01346e-08	-3.5394	2.50824e-06
ENSRNOT00000067854	Dynlrb1-201	3:150761328_150782493	658	1.0453e-08	-2.09157	2.57989e-06
ENSRNOT00000078929	Cetn2-201	X:152927717_152932953	1276	1.07976e-08	-4.70641	2.65761e-06
ENSRNOT00000016352	Ddi2-201	5:160236951_160282810	3522	1.08615e-08	14.4967	2.666e-06
ENSRNOT00000074446	Sub1-201	2:62022566_62034628	756	1.09509e-08	-2.00858	2.68058e-06
ENSRNOT00000058479	Kng1-201	11:81421782_81444375	1299	1.27938e-08	3.02392	3.09773e-06
ENSRNOT00000016237	Ptp4a1-201	9:37223728_37231291	2456	1.37545e-08	4.26699	3.31239e-06
ENSRNOT00000009894	Nfkbia-201	6:76267227_76270457	1565	1.40266e-08	3.90295	3.36884e-06
ENSRNOT00000013067	Slc39a14-201	15:51982981_52029816	4724	1.42925e-08	2.77401	3.4235e-06
ENSRNOT00000013869	Polr2k-201	7:74989222_74992582	517	1.57685e-08	-2.23363	3.76695e-06
ENSRNOT00000086272	Ndufv3-202	20:10265825_10275298	486	1.62026e-08	-2.45331	3.83985e-06
ENSRNOT00000073155	LOC100911238-201	12:8746854_8759599	704	1.88468e-08	-4.75292	4.38507e-06
ENSRNOT00000010117	Ndufa12-201	7:35125515_35163181	549	1.96169e-08	-2.01728	4.5406e-06
ENSRNOT00000065729	LOC100910882-201	3:152226709_152259156	1977	2.01243e-08	74.092	4.64601e-06
ENSRNOT00000009207	Mrps16-201	15:4351291_4353694	607	2.0931e-08	-2.3044	4.80742e-06
ENSRNOT00000045996	Haao-201	6:7045151_7058314	1252	2.15129e-08	-2.19758	4.91755e-06
ENSRNOT00000013244	Me1-201	8:94256838_94352246	2995	2.15207e-08	-5.45829	4.91755e-06
ENSRNOT00000056151	Serf2-201	3:113415773_113417478	541	2.3069e-08	-2.15048	5.24454e-06
ENSRNOT00000020670	Atp5f1d-201	7:12426810_12429897	799	2.40257e-08	-2.89746	5.44816e-06
ENSRNOT00000086435	Cyb5b-202	19:39357790_39393189	981	2.47867e-08	-6.48844	5.57825e-06
ENSRNOT00000064418	Micos10-201	5:157546855_157573183	505	2.81642e-08	-2.06713	6.27514e-06
ENSRNOT00000005471	Rpl23-201	10:85721393_85725429	562	2.90663e-08	-2.01484	6.41217e-06
ENSRNOT00000022897	Rps27-201	2:189572175_189573280	342	2.97716e-08	-2.1675	6.55159e-06
ENSRNOT00000041277	Ptbp1-201	7:12664036_12673687	2704	3.29481e-08	55.6703	7.19743e-06
ENSRNOT00000001954	Ywhag-201	12:23789637_23817883	1604	3.3111e-08	-52.2085	7.21538e-06
ENSRNOT00000023072	Akr1a1-201	5:135482067_135498822	1253	3.50601e-08	-2.36916	7.56629e-06
ENSRNOT00000005383	Dusp1-201	10:16970625_16973418	1936	3.62319e-08	14.5907	7.74791e-06
ENSRNOT00000001079	Fabp7-201	20:40769585_40773349	833	3.62485e-08	4.56336	7.74791e-06
ENSRNOT00000077462	Hpn-202	1:89534105_89539210	1303	4.25367e-08	-5.8028	8.86282e-06
ENSRNOT00000021387	Hint2-201	5:59150344_59152599	586	4.25558e-08	-2.1605	8.86282e-06
ENSRNOT00000027998	LOC100361913-201	1:87190380_87191588	778	4.4977e-08	-4.76395	9.28054e-06
ENSRNOT00000084642	Ahsa2-201	14:108265206_108273938	1259	4.82472e-08	5.42305	9.84165e-06
ENSRNOT00000056815	Hyi-201	5:137189472_137192240	1039	4.91243e-08	-2.4664	9.95241e-06
ENSRNOT00000013071	Naa38-201	10:55997613_55998691	711	4.99547e-08	-2.09868	1.00977e-05
ENSRNOT00000016520	Samm50-201	7:125058896_125082505	1679	5.38799e-08	-2.34033	1.07935e-05
ENSRNOT00000075242	NEWGENE_1308196-201	9:44491176_44571331	807	5.5536e-08	-3.23003	1.10756e-05
ENSRNOT00000092432	Bri3-203	12:12322246_12330929	744	5.5734e-08	-12.542	1.10903e-05
ENSRNOT00000020647	Tpi1-201	4:157328378_157331905	1444	5.72355e-08	-2.00728	1.13386e-05
ENSRNOT00000074942	Apoc3-201	8:50529317_50531498	536	6.09064e-08	-2.24709	1.20125e-05
ENSRNOT00000024083	Etfb-201	1:98472744_98486976	908	6.92394e-08	-2.15698	1.34776e-05
ENSRNOT00000010061	Dnaja1-201	5:57028466_57039378	1610	7.05031e-08	2.81513	1.36937e-05
ENSRNOT00000010271	Pnrc1-201	5:48501471_48504511	1610	7.35181e-08	-7.91264	1.41562e-05
ENSRNOT00000019192	Hmox1-201	19:14508615_14515456	1566	7.40118e-08	3.68079	1.42206e-05
ENSRNOT00000009485	Mien1-201	10:86391847_86393141	751	7.77196e-08	-2.16555	1.48373e-05
ENSRNOT00000015316	Inmt-201	4:85381888_85386231	1108	8.02014e-08	-31.8414	1.52459e-05
ENSRNOT00000026648	Timm13-201	7:11677339_11678442	805	8.57587e-08	-2.29177	1.62333e-05
ENSRNOT00000025986	Naxe-201	2:187424326_187426375	918	1.04194e-07	-2.32699	1.94753e-05
ENSRNOT00000084154	Cops2-202	3:118109405_118137191	3432	1.11459e-07	19.7943	2.06844e-05
ENSRNOT00000082184	Rsrp1-202	5:153260981_153264593	2761	1.15489e-07	-3.06924	2.1275e-05
ENSRNOT00000004385	Qdpr-201	14:70164649_70178284	1330	1.39488e-07	-2.22742	2.49252e-05
ENSRNOT00000090193	Ndufaf2-201	2:39321740_39434560	1064	1.4526e-07	-3.20437	2.56995e-05
ENSRNOT00000003106	Hnrnpdl-201	14:11199403_11202669	1316	1.51442e-07	6.19994	2.66875e-05
ENSRNOT00000011731	Jun-201	5:114011188_114014277	3089	1.61806e-07	18.1572	2.81256e-05
ENSRNOT00000032185	Gsta2-201	8:85640054_85645718	803	1.66343e-07	-3.02189	2.87465e-05
ENSRNOT00000005645	Ifitm1-201	1:213766757_213767815	568	1.70244e-07	-14.6078	2.93072e-05
ENSRNOT00000061878	Rab5b-201	7:3104550_3123297	3250	1.78551e-07	7.06889	3.06764e-05
ENSRNOT00000003391	Insig2-201	13:37266311_37287458	991	1.78884e-07	49.9446	3.06764e-05
ENSRNOT00000075819	Tma7-201	8:117815724_117820413	528	1.95562e-07	-2.03721	3.33444e-05
ENSRNOT00000073910	Ifrd1-201	6:60132023_60151420	1791	2.04065e-07	3.27102	3.45962e-05
ENSRNOT00000017742	Foxa2-201	3:142383277_142387481	2224	2.07715e-07	-3.80238	3.51482e-05
ENSRNOT00000016768	Plk2-201	2:41911130_41916901	2782	2.22081e-07	15.9187	3.74374e-05
ENSRNOT00000012377	Nbn-201	5:29622280_29656864	2679	2.27747e-07	27.4345	3.81764e-05
ENSRNOT00000084114	Zfp706-201	7:75801734_75809836	2294	2.46818e-07	-50.3525	4.11418e-05
ENSRNOT00000025845	Lipa-201	1:252816537_252849756	3202	2.48716e-07	7.40469	4.13808e-05
ENSRNOT00000072129	Uspl1-202	12:6930017_6956914	3591	2.6024e-07	6.84082	4.28853e-05
ENSRNOT00000027585	Mrpl23-201	1:215701543_215709313	540	2.64686e-07	-2.09364	4.34714e-05
ENSRNOT00000073796	Adssl1-201	6:137184819_137206693	1797	2.81553e-07	-3.7291	4.59039e-05
ENSRNOT00000028749	Macrod1-201	1:222311252_222451484	965	2.91986e-07	-2.88004	4.74318e-05
ENSRNOT00000019501	Ccn1-201	2:251529353_251532312	1984	3.01294e-07	9.89402	4.85905e-05
ENSRNOT00000071603	Selenbp1-201	2:195416468_195423787	1749	3.22175e-07	-2.16575	5.15092e-05
ENSRNOT00000091249	RGD1565355-210	4:14039976_14241269	2595	3.26453e-07	-25.5781	5.1991e-05
ENSRNOT00000020094	Klrg1-201	4:155039627_155051429	1392	3.39134e-07	-45.7004	5.39144e-05
ENSRNOT00000000058	Crp-201	13:91080340_91081629	1071	3.48842e-07	4.0938	5.53592e-05
ENSRNOT00000083682	Adh6-202	2:243550638_243561757	1336	3.50532e-07	-2.5028	5.55289e-05
ENSRNOT00000022196	Edf1-201	3:2781168_2785474	685	3.53763e-07	-2.42103	5.59415e-05
ENSRNOT00000081924	Hspa1b-201	20:4877323_4879779	2456	3.82869e-07	42.5761	5.99598e-05
ENSRNOT00000048767	Mt-nd5-201	MT:11735_13565	1830	3.85738e-07	2.12826	6.01461e-05
ENSRNOT00000088212	Ube2v2-202	11:89569488_89588385	438	3.92397e-07	22.3141	6.09717e-05
ENSRNOT00000012428	Caprin1-201	3:93702486_93734282	3288	4.86809e-07	5.11659	7.38438e-05
ENSRNOT00000036435	Slc28a2-202	3:114355813_114378941	1980	5.01926e-07	5.69537	7.58792e-05
ENSRNOT00000026057	Acsl4-201	X:113596238_113659944	4951	5.10146e-07	4.87515	7.67905e-05
ENSRNOT00000070895	Echdc3-201	17:76008806_76022813	1146	5.10533e-07	-2.05237	7.67905e-05
ENSRNOT00000085279	Ephx1-202	13:99271365_99300579	1755	5.15221e-07	-2.21934	7.71063e-05
ENSRNOT00000055034	Nsmce1-201	1:196857490_196883051	1177	5.22608e-07	-3.0257	7.7946e-05
ENSRNOT00000071913	Atp5f1e-201	3:172563104_172566010	375	5.84469e-07	-917.81	8.6313e-05
ENSRNOT00000043533	Kynu-201	3:28416953_28566928	1804	5.98122e-07	4.05293	8.80721e-05
ENSRNOT00000003412	Litaf-201	10:4719712_4763510	2238	6.22835e-07	4.66133	9.1225e-05
ENSRNOT00000024016	Cdc123-201	17:76410584_76454282	1305	6.40857e-07	42.7895	9.35577e-05
ENSRNOT00000006618	Ahr-201	6:54963989_55001464	5144	6.48866e-07	10.4874	9.43774e-05
ENSRNOT00000056100	Rtp3-201	8:119260617_119265157	1958	7.17029e-07	-3.11306	0.000102337
ENSRNOT00000090858	Zc3h11a-201	13:50196041_50234862	2691	7.53143e-07	3.864	0.000106809
ENSRNOT00000002450	Umps-201	11:70034138_70044628	1686	8.80981e-07	-2.34215	0.000122603
ENSRNOT00000021170	Cdh2-201	18:8146970_8360684	4339	9.17142e-07	3.37339	0.000126845
ENSRNOT00000005346	Pfdn2-201	13:89725868_89743848	1667	9.53564e-07	37.1979	0.000130955
ENSRNOT00000085978	Ndufa12-202	7:35125423_35167406	647	9.54188e-07	-6.19705	0.000130955
ENSRNOT00000005085	Atf3-201	13:109817894_109849632	1888	9.70853e-07	23.303	0.000133038
ENSRNOT00000013100	Poldip2-201	10:65780493_65790272	1382	9.78248e-07	69.955	0.000133641
ENSRNOT00000091765	Hnrnpf-203	4:149970566_149978895	2229	9.96388e-07	7.35439	0.000135498
ENSRNOT00000018145	Mvd-201	19:55258904_55268951	1697	1.00733e-06	-2.49169	0.000136571
ENSRNOT00000025525	Cox5a-201	8:62298357_62309765	600	1.01118e-06	-2.11107	0.000136885
ENSRNOT00000026760	Stat3-201	10:88790407_88842233	4428	1.03694e-06	48.2289	0.000139947
ENSRNOT00000024436	Anxa4-201	4:118538776_118595580	1956	1.05205e-06	25.0731	0.00014156
ENSRNOT00000015466	Scp2-202	5:127620273_127661028	1932	1.05534e-06	-9.79068	0.000141788
ENSRNOT00000023651	Cltb-201	17:10537364_10554989	1047	1.05753e-06	-3.37949	0.000141869
ENSRNOT00000087718	Sec63-202	20:47494423_47559979	2557	1.12972e-06	2.9297	0.000150424
ENSRNOT00000021734	Sh3bgrl3-201	5:152357269_152358643	755	1.13347e-06	-2.58563	0.0001507
ENSRNOT00000037039	Ppp1r15b-201	13:49933154_49940961	5383	1.1657e-06	3.27942	0.000152905
ENSRNOT00000073247	Gpx1-201	8:117117429_117118522	873	1.19416e-06	-9.63266	0.000155755
ENSRNOT00000064984	Nhp2-201	10:34975707_34979082	666	1.25378e-06	-3.45061	0.0001626
ENSRNOT00000007779	Arhgdib-201	4:170913922_170932618	1173	1.25574e-06	10.5	0.0001626
ENSRNOT00000076458	Krtcap2-202	2:188561428_188565332	1008	1.37429e-06	-2.1052	0.000175911
ENSRNOT00000065275	Czib-201	5:127489417_127497293	1394	1.44057e-06	-2.39651	0.000183084
ENSRNOT00000022846	LOC100364435-201	4:100882215_100883275	472	1.55933e-06	-2.17089	0.000197056
ENSRNOT00000063779	Smim1-201	5:171309334_171312026	453	1.57709e-06	-4.39985	0.000199019
ENSRNOT00000031891	Fus-201	1:199412833_199426702	1814	1.59036e-06	-2.93978	0.000199846
ENSRNOT00000087528	Mrpl14-202	9:17687621_17698569	768	1.62646e-06	-3.0256	0.000203809
ENSRNOT00000083629	Akr7a2-202	5:157759447_157768471	1239	1.92614e-06	-2.29773	0.000238354
ENSRNOT00000026551	Lsm7-201	7:11724961_11727388	488	1.93659e-06	-2.3213	0.000239315
ENSRNOT00000024832	Apoc4-201	1:80595325_80599572	530	1.95269e-06	-2.18916	0.000240639
ENSRNOT00000078203	AABR07034632.1-201	11:81707803_81735592	1702	2.2342e-06	-2.82963	0.000271403
ENSRNOT00000077177	Igfbp1-201	14:87448691_87453785	1528	2.33638e-06	3.33712	0.000282086
ENSRNOT00000012760	Pdk4-201	4:30546663_30556814	1573	2.36567e-06	5.53844	0.000284087
ENSRNOT00000007398	Myh9-201	7:118741109_118792625	6221	2.53734e-06	-4.6851	0.000303429
ENSRNOT00000027260	Atf5-201	1:100808240_100810522	1030	2.54032e-06	-184.622	0.000303429
ENSRNOT00000013912	Cgrrf1-201	15:23619122_23639628	1323	2.64314e-06	-2.35906	0.000313614
ENSRNOT00000024160	Akr7a3-201	5:157801162_157813756	1259	2.65768e-06	-2.20706	0.000314921
ENSRNOT00000085966	Aldh1l1-202	4:123516787_123557501	2709	2.71651e-06	-4.49618	0.000320001
ENSRNOT00000067643	A1cf-201	1:250426157_250514866	4350	2.86136e-06	13.7504	0.000333744
ENSRNOT00000082141	Acss3-202	7:49047012_49250957	4808	2.91434e-06	2.19156	0.000339038
ENSRNOT00000019392	Chac1-201	3:111160204_111163425	1569	2.9236e-06	51.0147	0.000339277
ENSRNOT00000043559	Hsd17b10-201	X:21696771_21699241	931	3.05002e-06	-3.07187	0.000351618
ENSRNOT00000009398	Timm17a-201	13:52124634_52136127	904	3.11699e-06	-2.46519	0.000357954
ENSRNOT00000044975	Tapbp-201	20:5468077_5476193	1727	3.43572e-06	-4.82203	0.000389055
ENSRNOT00000091946	Coa8-202	6:136279495_136304095	582	3.45494e-06	36.6912	0.000390736
ENSRNOT00000021865	Kyat1-201	3:8752624_8766433	1417	3.64763e-06	-3.27389	0.000409934
ENSRNOT00000038178	Tapbpl-201	4:157735747_157743199	1886	3.68525e-06	3.68717	0.000412605
ENSRNOT00000022747	Uqcr11-201	7:12171184_12175835	508	3.732e-06	-2.07063	0.000417316
ENSRNOT00000000306	Slc25a1-201	11:87204174_87207264	1715	3.87813e-06	-2.18255	0.000432034
ENSRNOT00000057898	Mt1-201	17:78793335_78793724	389	3.93505e-06	-43.3456	0.000437829
ENSRNOT00000044802	Mrpl41-201	3:2181044_2181962	705	4.1162e-06	-2.07993	0.000455715
ENSRNOT00000057585	Fn1-202	9:78900102_78969078	8136	4.29376e-06	3.55776	0.000474197
ENSRNOT00000027608	Dap3-201	2:188225612_188252725	1849	4.3577e-06	-2.53144	0.000478648
ENSRNOT00000030043	Rpl11-201	5:154390847_154394328	537	4.37194e-06	2.01571	0.000479278
ENSRNOT00000026803	Ncoa4-201	16:8309238_8323293	3369	4.38932e-06	2.90487	0.000480593
ENSRNOT00000073983	Ccs-201	1:220075246_220096404	1108	4.63042e-06	-2.67286	0.000505134
ENSRNOT00000000079	Acot7-201	5:169357516_169450219	1499	4.66934e-06	-2.871	0.00050752
ENSRNOT00000086474	Gck-203	14:86149145_86190659	2220	5.03239e-06	-8.2799	0.000542363
ENSRNOT00000028847	Atrn-201	3:123434408_123567918	8725	5.13242e-06	14.881	0.000550488
ENSRNOT00000022824	Chka-201	1:219077770_219126220	2530	5.16314e-06	4.0245	0.000553118
ENSRNOT00000045870	Sel1l-202	6:115572648_115616859	6402	5.29946e-06	6.06156	0.000566023
ENSRNOT00000019302	Cyp4v3-201	16:50111305_50136727	3675	5.44944e-06	2.8944	0.000577557
ENSRNOT00000073149	Abca6-201	10:98478066_98544447	5411	5.54812e-06	3.6997	0.000586623
ENSRNOT00000065947	Abca8a-202	10:98319479_98390384	5647	5.61781e-06	7.49441	0.000592589
ENSRNOT00000007677	Cacfd1-201	3:5555806_5566613	1829	5.64175e-06	-29.2388	0.000593713
ENSRNOT00000075589	Cyp4f6-202	7:15198966_15225309	1491	5.76265e-06	-4.81122	0.000603808
ENSRNOT00000022983	Serpinh1-201	1:164301009_164308317	2052	5.82194e-06	2.67455	0.000608376
ENSRNOT00000047439	RT1-T24-4-201	20:3189472_3197457	1638	5.84009e-06	-2.46588	0.00060956
ENSRNOT00000050511	Tst-201	7:119616323_119623072	1093	6.10281e-06	-2.21236	0.000630353
ENSRNOT00000091612	Clu-203	15:42659370_42665853	1326	6.6595e-06	-19.085	0.000676897
ENSRNOT00000031005	Lrp1-201	7:70846343_70926903	14714	6.70872e-06	7.70825	0.000680352
ENSRNOT00000044608	Hspa8-201	8:44990013_44993179	1938	6.92724e-06	5.41477	0.00070013
ENSRNOT00000002738	Alcam-201	11:50781126_50985083	2868	7.06297e-06	9.21614	0.000712236
ENSRNOT00000083500	LOC501233-206	19:15094308_15334886	1676	7.12026e-06	-7.66266	0.000717204
ENSRNOT00000013053	Mapk6-201	8:82328019_82351108	4173	7.73318e-06	12.5762	0.000771117
ENSRNOT00000057382	LOC100912481-201	4:24612204_24640686	2194	7.87233e-06	-4.07744	0.000783244
ENSRNOT00000078131	Kng1-202	11:81423465_81444375	1905	8.03065e-06	3.02099	0.000797221
ENSRNOT00000081802	Ptms-201	4:157435372_157439507	1136	8.07045e-06	-2.02129	0.00079851
ENSRNOT00000017053	Dnaja4-201	8:59278261_59294003	1827	8.65446e-06	5.25445	0.000847843
ENSRNOT00000037564	Pex11g-201	12:2000426_2007516	1152	8.93776e-06	-3.20262	0.000872726
ENSRNOT00000079796	Dpt-204	13:83073548_83102397	1720	8.98972e-06	-2.38674	0.000876842
ENSRNOT00000087980	Aqp9-201	8:77559623_77599781	1715	9.08803e-06	-6.65332	0.000882577
ENSRNOT00000058852	Wac-201	17:60888016_60946426	1935	9.09833e-06	4.45726	0.000882617
ENSRNOT00000026641	Antkmt-201	10:15159802_15161938	1138	9.22955e-06	-2.34683	0.000893407
ENSRNOT00000026379	Josd2-201	1:100473642_100477351	850	9.46872e-06	-2.59245	0.000914576
ENSRNOT00000082312	Wbp11l1-202	4:170772162_170810080	2385	9.4792e-06	-8.99284	0.0009146
ENSRNOT00000006111	Rnd3-201	3:36642586_36660758	2820	9.74441e-06	4.03793	0.000932135
ENSRNOT00000088001	LOC100912405-201	8:38545714_38549268	526	1.00202e-05	-34.0902	0.000954428
ENSRNOT00000025559	Herpud1-201	19:11046908_11057254	1842	1.02601e-05	2.89364	0.000974161
ENSRNOT00000090360	Ccm2-202	14:86813081_86859406	1780	1.0686e-05	11.6547	0.00100499
ENSRNOT00000019386	Sdc4-201	3:160872502_160891190	2488	1.11781e-05	2.42027	0.00104358
ENSRNOT00000027999	Acadsb-201	1:201981356_202021008	2040	1.11926e-05	3.93681	0.00104384
ENSRNOT00000010545	Pdhb-201	15:18540912_18546854	1786	1.12249e-05	-2.33462	0.00104577
ENSRNOT00000025952	Aurkaip1-202	5:173274773_173276169	767	1.14561e-05	-2.2519	0.00106397
ENSRNOT00000058190	Ndufc1-201	2:140462899_140464607	384	1.16466e-05	-16.3682	0.00108054
ENSRNOT00000020625	Alad-201	5:78368866_78379346	1378	1.17783e-05	-3.08411	0.00108937
ENSRNOT00000025652	Ugt1a6-203	9:95202631_95302822	2264	1.2362e-05	19.5082	0.00113164
ENSRNOT00000028328	Bax-201	1:101451801_101457207	831	1.24101e-05	-2.31984	0.00113488
ENSRNOT00000052098	Rangap1-201	7:122940375_122967178	2765	1.25065e-05	-2.39943	0.00114253
ENSRNOT00000016499	S100a16-201	2:189922995_189928848	1155	1.27802e-05	-4.30416	0.00116397
ENSRNOT00000079310	LOC100361457-201	3:75643053_75644954	1901	1.29478e-05	-3.41115	0.00117563
ENSRNOT00000022661	Msrb2-201	17:86066832_86148130	1148	1.29631e-05	-2.05204	0.00117582
ENSRNOT00000066119	Dpt-201	13:83073543_83102396	1616	1.29841e-05	-13.0976	0.00117654
ENSRNOT00000083601	Gcgr-202	10:109708754_109716128	1865	1.36456e-05	-2.48263	0.0012253
ENSRNOT00000072666	AABR07043748.1-201	19:38340737_38344845	4108	1.38057e-05	-3.2829	0.00123843
ENSRNOT00000006239	Dazap2-201	7:142239034_142243241	858	1.42315e-05	69.0172	0.00127279
ENSRNOT00000047820	AABR07070043.1-201	8:45561389_45562574	1185	1.44255e-05	-5.85756	0.00128555
ENSRNOT00000012530	Dnajc15-201	15:59990130_60056710	780	1.4479e-05	-2.15948	0.00128847
ENSRNOT00000006906	Sec61g-201	14:99774588_99780964	443	1.46136e-05	-2.06695	0.00129657
ENSRNOT00000078578	Bckdk-202	1:199351627_199356296	1798	1.48557e-05	-2.90532	0.00131284
ENSRNOT00000093215	AABR07031521.1-201	18:17116551_17118501	1950	1.51537e-05	3.62201	0.00133127
ENSRNOT00000040278	Rps10l1-201	10:19715274_19715832	558	1.52395e-05	-3.14152	0.00133619
ENSRNOT00000074351	Npy-201	4:79573997_79581208	575	1.53769e-05	-5.96269	0.00134559
ENSRNOT00000061041	AC094217.1-201	1:31527645_31528083	438	1.56649e-05	-8.53824	0.00136945
ENSRNOT00000042736	LOC102555453-201	X:1345683_1346181	498	1.59857e-05	3.51989	0.00139075
ENSRNOT00000003277	Uso1-201	14:17371452_17436897	3845	1.63661e-05	4.08632	0.00141826
ENSRNOT00000081239	Pfkfb1-203	X:23092158_23144324	1581	1.79213e-05	-3.99142	0.00153517
ENSRNOT00000001115	Ddx39b-201	20:4806107_4818568	1700	1.85069e-05	-2.13943	0.00158079
ENSRNOT00000005270	Trir-201	19:26142719_26146136	889	1.86426e-05	-2.00996	0.00159086
ENSRNOT00000041908	Fmo1-201	13:80712881_80745347	2299	1.96432e-05	42.2396	0.00166038
ENSRNOT00000003586	Cacybp-201	13:77948770_77959089	1526	1.99495e-05	2.2854	0.00168047
ENSRNOT00000019106	Xylb-201	8:128044083_128076946	3384	2.1041e-05	2.39683	0.00176021
ENSRNOT00000083354	Kmt2d-202	7:140489504_140506925	1583	2.16526e-05	-2.9683	0.00180462
ENSRNOT00000090985	Apoc3-202	8:50529317_50531423	579	2.19197e-05	-2.07953	0.00182348
ENSRNOT00000013851	Rab30-201	1:157646172_157660008	1295	2.19595e-05	3.94825	0.00182509
ENSRNOT00000026637	Vegfa-202	9:17340340_17355681	3546	2.26942e-05	4.52388	0.0018844
ENSRNOT00000086271	Ints6-202	15:45858607_45927804	4044	2.32423e-05	10.1815	0.00192633
ENSRNOT00000004172	Slc9a3r2-201	10:14003319_14013870	2146	2.35376e-05	-5.01999	0.00194899
ENSRNOT00000065633	Ccng1-201	10:25903924_25910298	3198	2.43654e-05	29.3281	0.00200472
ENSRNOT00000055588	Smim26-201	3:138765026_138766515	646	2.46724e-05	-2.13486	0.0020249
ENSRNOT00000022047	Sumo1-201	9:66453437_66483614	1116	2.53791e-05	46.6134	0.00207646
ENSRNOT00000024011	Klf15-201	4:122365092_122377659	2428	2.56437e-05	8.8748	0.00209428
ENSRNOT00000036247	LOC103690006-201	4:117800627_117814658	1130	2.57947e-05	-5.96225	0.00210276
ENSRNOT00000012295	Nptn-202	8:63379189_63445642	1858	2.58911e-05	3.33899	0.0021087
ENSRNOT00000015767	Pnpla3-201	7:125034763_125055976	3215	2.60863e-05	-13.0171	0.00212162
ENSRNOT00000017319	Ppdpf-201	3:176691328_176692271	660	2.62291e-05	-3.07287	0.00212605
ENSRNOT00000032613	Gpi-201	1:90063410_90091287	2014	2.6247e-05	-2.80123	0.00212605
ENSRNOT00000079494	RT1-CE10-202	20:154073_157677	1547	2.6933e-05	-3.48912	0.0021757
ENSRNOT00000045571	Cyp4a3-202	5:134469269_134484839	1521	2.70132e-05	3.29073	0.00218021
ENSRNOT00000073846	LOC689574-201	4:62780595_62790422	759	2.758e-05	-3.2002	0.00222194
ENSRNOT00000070986	Ubxn6-201	9:10995547_11000642	1632	2.76716e-05	-6.95562	0.00222732
ENSRNOT00000017675	Akr1d1-201	4:65110745_65141728	975	2.78128e-05	9.64591	0.00223147
ENSRNOT00000082121	Stx4-202	1:199287709_199294864	1127	2.85008e-05	29.3428	0.00227155
ENSRNOT00000087830	AABR07000902.1-201	1:27924824_27927782	285	2.88257e-05	-5.62324	0.00229335
ENSRNOT00000017034	Znrd2-201	1:221087802_221089586	1054	2.90589e-05	-3.16772	0.00230734
ENSRNOT00000014810	Bet1-201	4:29082364_29092753	1516	2.91383e-05	-11.1403	0.00230999
ENSRNOT00000092442	Upf2-202	17:76175642_76188979	1521	2.94577e-05	10.2802	0.00233118
ENSRNOT00000008972	Calu-202	4:56625610_56653111	3166	2.98808e-05	6.13746	0.00235839
ENSRNOT00000007754	RGD1563941-201	8:52829084_52830609	1525	3.01521e-05	-2.47995	0.00237561
ENSRNOT00000010610	Ankrd9-201	6:135410029_135412312	1452	3.12177e-05	-17.2674	0.00244877
ENSRNOT00000055723	Dpyd-201	2:222214884_222694627	2956	3.25872e-05	3.2304	0.00254058
ENSRNOT00000044788	Ppp1r15a-201	1:101511900_101514974	2027	3.2755e-05	5.04355	0.00254921
ENSRNOT00000026194	Stk16-201	9:82411012_82414240	1480	3.33934e-05	6.82536	0.00258763
ENSRNOT00000015373	Coa8-201	6:136185486_136210940	1109	3.41139e-05	-2.14878	0.00263205
ENSRNOT00000020015	Aldh8a1-201	1:16910068_16930481	2697	3.56855e-05	2.84585	0.00273676
ENSRNOT00000005781	Glrx5-201	6:128750794_128760880	2149	3.58602e-05	-2.14514	0.00274276
ENSRNOT00000007698	Gadd45a-201	4:97782511_97784842	1241	3.59576e-05	-11.4828	0.00274584
ENSRNOT00000085669	Ero1b-202	17:90710554_90756048	3165	3.61313e-05	27.4512	0.00275439
ENSRNOT00000072735	Dpyd-202	2:221823686_222165727	1191	3.65217e-05	4.63124	0.00278179
ENSRNOT00000089847	Dkc1-202	X:155844913_155862363	1803	3.69053e-05	-2.50061	0.00279907
ENSRNOT00000024264	Nars1-201	18:59986359_60002569	2605	3.76136e-05	46.6202	0.0028432
ENSRNOT00000083935	Zfp385a-202	7:144939618_144966370	2303	3.80122e-05	-6.10035	0.00286358
ENSRNOT00000041384	Rps29-201	13:91334003_91334306	303	3.84118e-05	-5.72303	0.00288638
ENSRNOT00000004046	Nmt1-201	10:91126688_91160720	2204	3.91347e-05	-2.25191	0.00293329
ENSRNOT00000076951	Acat2l1-202	1:47996520_48026268	1975	3.92239e-05	-2.61473	0.00293752
ENSRNOT00000009047	Wwp1-201	5:33609135_33664435	3051	3.99028e-05	2.97784	0.00298336
ENSRNOT00000085725	Tmem30a-202	8:87224340_87245774	1291	4.06988e-05	60.7787	0.00302768
ENSRNOT00000025045	Ugt1a6-201	9:95295700_95302822	2259	4.07494e-05	3.00583	0.00302892
ENSRNOT00000059516	Commd8-201	14:38612407_38622580	1384	4.10908e-05	27.9026	0.00304921
ENSRNOT00000080990	Emd-201	X:156452817_156456035	1476	4.13952e-05	-22.5011	0.00306896
ENSRNOT00000023289	Rsrp1-201	5:153260929_153264669	1515	4.30934e-05	2.14942	0.00317313
ENSRNOT00000077202	Tnfrsf9-202	5:168019057_168035792	1288	4.32444e-05	-3.40287	0.00317997
ENSRNOT00000008522	Rab2a-201	5:21632925_21695519	621	4.50919e-05	2.98224	0.00331038
ENSRNOT00000004559	F9-201	X:143097524_143141794	2784	4.52077e-05	3.45275	0.00331568
ENSRNOT00000071426	Pcbd2-201	17:8929809_8980571	384	4.61456e-05	-2.07321	0.00336837
ENSRNOT00000088737	Wfdc21-202	10:71047309_71053191	379	4.80451e-05	-12.261	0.00348707
ENSRNOT00000023152	Cyp27a1-201	9:81968331_81998169	2276	4.93105e-05	10.5452	0.00356733
ENSRNOT00000071425	Rab10-201	6:27668402_27721120	2713	5.24899e-05	4.79925	0.00375177
ENSRNOT00000044613	Hyou1-201	8:48699768_48711910	4686	5.27357e-05	5.72534	0.00376462
ENSRNOT00000084730	Ywhag-202	12:23789674_23817865	3410	5.27539e-05	30.6469	0.00376462
ENSRNOT00000027882	Nosip-201	1:101066125_101072535	1166	5.29076e-05	-2.69392	0.00376844
ENSRNOT00000076637	RGD1305178-202	3:9813911_9822182	1301	5.2934e-05	4.71732	0.00376844
ENSRNOT00000071712	Srm-201	3:14588869_14591974	1196	5.34219e-05	-4.44173	0.00379712
ENSRNOT00000060843	Baiap2l1-201	12:12227009_12321172	2276	5.34951e-05	2.82758	0.0037993
ENSRNOT00000014493	Rpl32-201	4:147715472_147719072	541	5.41874e-05	-2.07083	0.00384236
ENSRNOT00000028838	Itpa-201	3:123209607_123221269	1190	5.51907e-05	-2.0053	0.00389804
ENSRNOT00000054915	Fn3k-201	10:110631493_110642260	679	5.66283e-05	-32.4119	0.00398696
ENSRNOT00000049154	Slco1a1-201	4:176158639_176231344	2250	5.71541e-05	5.1489	0.00401449
ENSRNOT00000008356	Calu-201	4:56625560_56653105	3210	5.72174e-05	9.72209	0.00401578
ENSRNOT00000022713	Paqr7-201	5:152708774_152720229	2233	5.76571e-05	-11.8854	0.00403713
ENSRNOT00000007333	Irf6-201	13:111870120_111889328	4044	5.80565e-05	34.6936	0.00405873
ENSRNOT00000051590	Pkig-201	3:160047295_160115177	950	5.97684e-05	-2.26846	0.00415402
ENSRNOT00000041717	Prkaca-201	19:25095088_25118860	2220	5.97915e-05	3.60128	0.00415402
ENSRNOT00000005863	Lpin1-201	6:41799748_41870046	3082	6.03841e-05	8.15333	0.00419194
ENSRNOT00000025649	Rab14-201	3:14373274_14386118	3317	6.07329e-05	-3.04239	0.00420634
ENSRNOT00000077445	Ddx6-201	8:48925603_48958026	2698	6.09685e-05	5.96554	0.00421613
ENSRNOT00000023554	Hmgcs1-201	2:52431600_52445055	3220	6.19256e-05	11.2857	0.00427239
ENSRNOT00000042108	AC115277.1-201	7:15385867_15386419	552	6.19825e-05	-8.70476	0.00427301
ENSRNOT00000028149	Nbr1-201	10:89459649_89483785	4166	6.25096e-05	3.07743	0.00430603
ENSRNOT00000042875	Nagk-201	4:115473810_115481438	1488	6.37105e-05	-2.7145	0.00437526
ENSRNOT00000019579	Irs1-201	9:88033667_88086488	5354	6.45076e-05	8.23406	0.00440991
ENSRNOT00000007321	Sec16b-201	13:75177964_75216933	4282	6.45111e-05	-9.67648	0.00440991
ENSRNOT00000029025	Cdc42-202	5:155691389_155728300	923	6.49681e-05	33.2476	0.00443775
ENSRNOT00000014073	LOC299282-202	6:128073343_128080878	2057	6.63087e-05	2.96051	0.00450864
ENSRNOT00000005014	Prdx4-201	X:43497762_43512991	907	6.8796e-05	10.538	0.0046565
ENSRNOT00000026390	LOC100911881-201	1:214476386_214511529	1493	6.98184e-05	-2.20498	0.00471142
ENSRNOT00000087540	Tmx1-201	6:92864122_92874204	1837	7.02204e-05	30.4032	0.00472869
ENSRNOT00000074005	Fbxo31-202	19:53487612_53497006	1848	7.06639e-05	-6.27675	0.00475054
ENSRNOT00000009122	Synj2bp-201	6:105224165_105261549	5811	7.13629e-05	7.54037	0.00479032
ENSRNOT00000009683	Nr0b2-201	5:151776003_151779319	1111	7.18605e-05	-3.39288	0.0048201
ENSRNOT00000003832	Rbm25l1-201	10:10457319_10460756	3437	7.197e-05	-2.82149	0.00482383
ENSRNOT00000076880	Slc33a1-202	2:154520086_154542919	3108	7.2738e-05	3.93669	0.00487117
ENSRNOT00000066303	Cant1-201	10:107432505_107445522	2670	7.37906e-05	19.7379	0.00491473
ENSRNOT00000080887	G6pd-201	X:156274799_156293926	2380	7.38213e-05	-5.76046	0.00491473
ENSRNOT00000039991	RGD1597339-201	1:225085281_225087266	644	7.57982e-05	-2.01874	0.00502388
ENSRNOT00000021862	Tkt-201	16:6609667_6634595	2077	7.59768e-05	-2.16586	0.00503198
ENSRNOT00000079036	Cyp2b1-202	7:99142449_99181773	1878	7.70933e-05	-43.7103	0.0050946
ENSRNOT00000093353	St3gal1-202	7:107895044_107963073	5634	7.73569e-05	8.36685	0.00510824
ENSRNOT00000020737	Tmem14c-201	17:21571517_21577085	1076	7.78227e-05	3.78772	0.00513142
ENSRNOT00000023903	Dram2-201	2:209161046_209188622	1400	8.14149e-05	2.28819	0.00534069
ENSRNOT00000079074	Rnu3a-201	20:45357178_45357393	215	8.15609e-05	-42.7836	0.00534634
ENSRNOT00000010380	Bloc1s1-201	7:3342629_3346238	548	8.17198e-05	-2.69155	0.00535282
ENSRNOT00000018629	Sall1-201	19:23389374_23405039	5201	8.30133e-05	2.44056	0.00542562
ENSRNOT00000002187	Adamts1-201	11:25342125_25350974	4400	8.31688e-05	13.2534	0.00543098
ENSRNOT00000001882	Sdsl-201	12:41636993_41647205	1378	8.32169e-05	-4.36837	0.00543098
ENSRNOT00000077502	Kmt2d-201	7:140489491_140546908	18521	8.34904e-05	15.3118	0.00544423
ENSRNOT00000050018	Rab9a-201	X:29525255_29547294	1272	8.45385e-05	2.90113	0.00549636
ENSRNOT00000090451	Capza2-201	4:44936289_44972267	2303	8.65273e-05	2.01472	0.00559796
ENSRNOT00000042558	Cib1-201	1:142014957_142020525	879	8.93284e-05	-2.41948	0.00574589
ENSRNOT00000074595	Glyctk-201	8:114848083_114853103	1976	8.98799e-05	-2.88955	0.00577721
ENSRNOT00000028095	Pmvk-201	2:188784221_188793895	1092	9.01192e-05	-2.22029	0.00578843
ENSRNOT00000014135	Kank2-201	8:22791999_22821223	4792	9.11676e-05	-4.61223	0.00583693
ENSRNOT00000057179	LOC100910833-201	6:131602412_131648661	1143	9.1201e-05	-22.2537	0.00583693
ENSRNOT00000046879	Ube2e2-201	15:7871496_7927939	727	9.47155e-05	-2.59266	0.00603592
ENSRNOT00000081033	Rab28-202	14:73889336_73963202	1467	9.62046e-05	-5.83795	0.00609036
ENSRNOT00000082138	Ubr4-202	5:157848210_157956132	15961	9.65816e-05	15.4243	0.00610261
ENSRNOT00000005363	Dnajb9-201	6:64165912_64170151	1956	9.67221e-05	2.93723	0.00610716
ENSRNOT00000088391	Nedd4-201	8:79323407_79408833	5349	9.69827e-05	11.1314	0.00611929
ENSRNOT00000071998	Tob2-201	7:123079536_123088279	2308	9.88255e-05	5.42604	0.00621363
ENSRNOT00000025687	Pik3r1-201	2:31745087_31826867	4048	9.91146e-05	8.45892	0.00621868
ENSRNOT00000093245	Trip12-204	9:92308120_92435365	6543	0.000100135	5.67272	0.00626511
ENSRNOT00000075292	Irf2bp2-201	19:59499875_59502161	1716	0.000108497	3.2861	0.00666359
ENSRNOT00000028514	Tmem147-201	1:89177991_89179825	871	0.000109943	-2.0404	0.00673499
ENSRNOT00000028624	Fxyd1-201	1:89484198_89488223	533	0.000109982	-2.35082	0.00673499
ENSRNOT00000065079	RGD1559459-201	14:22937420_22952822	1593	0.000110551	4.79665	0.00676056
ENSRNOT00000011392	Ppcs-201	5:138466292_138470096	1725	0.000111269	-2.26333	0.0067998
ENSRNOT00000072431	AABR07064061.1-201	6:62796950_62798384	1434	0.000111459	5.88486	0.00680679
ENSRNOT00000003633	Abat-201	10:7093404_7200499	2638	0.00011521	-2.19471	0.00700711
ENSRNOT00000083611	Naa10-201	X:156863753_156868950	938	0.000118555	-2.95117	0.0071812
ENSRNOT00000019126	Sf3b1-201	9:61594619_61634510	4954	0.00012047	2.70027	0.00725971
ENSRNOT00000064836	Vta1-201	1:8830411_8878136	1176	0.000122185	-3.02461	0.00735127
ENSRNOT00000088205	Rasl10b-201	KL568414.1:23533_32066	2513	0.000125562	-2.49367	0.00753919
ENSRNOT00000027075	Ethe1-201	1:81456983_81472097	1027	0.000126013	-2.38988	0.00755954
ENSRNOT00000026528	Rps5-201	1:65660469_65664767	765	0.000128531	-9.52669	0.00768134
ENSRNOT00000024176	Aph1b-201	8:72608219_72629265	1281	0.000129685	-2.63946	0.00773479
ENSRNOT00000037066	Timm17b-201	X:15340838_15347591	519	0.000135671	-2.07751	0.00803816
ENSRNOT00000005987	Cltc-201	10:74014561_74070266	6069	0.000137326	5.57347	0.00813079
ENSRNOT00000076522	Cd164-202	20:46250362_46261994	2734	0.000137505	-2.68503	0.008136
ENSRNOT00000022721	Tat-201	19:41675354_41686229	2312	0.000137761	2.40641	0.00814579
ENSRNOT00000012400	Fermt2-201	15:19807807_19876389	3212	0.000143086	2.60777	0.00841609
ENSRNOT00000041957	AABR07061950.1-201	4:154780301_154855098	2616	0.000144609	3.04294	0.00849417
ENSRNOT00000056199	Shisa5-201	8:117793288_117795919	1454	0.00014752	5.42535	0.00864271
ENSRNOT00000092736	C5-202	3:14049994_14112851	4405	0.000147779	3.16211	0.00865225
ENSRNOT00000025415	Picalm-201	1:154377528_154457089	1833	0.000148431	7.25074	0.00867905
ENSRNOT00000016479	Slirp-201	6:111476767_111486039	2817	0.000150152	-2.78593	0.00877394
ENSRNOT00000005917	Wdr83-201	19:26188637_26194198	1179	0.000150446	-2.64117	0.008782
ENSRNOT00000020609	Tmem160-201	1:78417718_78420427	819	0.000151908	-2.03026	0.00884759
ENSRNOT00000042688	LOC100362027-201	10:38024476_38024937	461	0.00015272	-2.46533	0.00888909
ENSRNOT00000044226	Septin4-201	10:74874129_74884196	1406	0.000157677	-5.64096	0.00912413
ENSRNOT00000008728	Pdia4-201	4:77470635_77489535	2329	0.00015802	2.88118	0.00913606
ENSRNOT00000009299	Grb7-201	10:86399826_86409348	2893	0.000159244	2.79852	0.00918506
ENSRNOT00000016758	Snrpa1-201	1:126961388_126974453	1040	0.000163755	-2.5491	0.00939674
ENSRNOT00000008608	Mif-201	20:13732197_13732859	348	0.000164616	-2.48114	0.0094219
ENSRNOT00000002152	Nrip1-201	11:14658224_14741563	7910	0.000165977	15.0897	0.00948157
ENSRNOT00000074738	AABR07018078.1-201	15:38647778_38709984	1275	0.00016863	-2.65968	0.00960247
ENSRNOT00000073028	Cd99-201	20:56192389_56197025	699	0.000170149	-2.11159	0.0096582
ENSRNOT00000016881	Sfr1-201	1:267505335_267509350	1354	0.000171232	-2.20843	0.00970113
ENSRNOT00000083275	Bach1-202	11:27382048_27398842	3519	0.000173034	12.9088	0.0097908
ENSRNOT00000087342	Man1a1-203	20:35257984_35450513	5076	0.000173931	5.58135	0.00983516
ENSRNOT00000007424	Desi1-201	7:123238332_123259636	1416	0.000174038	23.5785	0.00983516
ENSRNOT00000019959	Ecpas-201	5:75931292_76039760	5813	0.00017513	4.90069	0.00987812
ENSRNOT00000077564	LOC103694877-201	AABR07024106.1:11533_12195	348	0.000177887	-2.46729	0.00999577
ENSRNOT00000019486	Bzw1-201	9:65279674_65291651	1777	0.000178592	32.5046	0.0100165
ENSRNOT00000047655	Ugt2b15-202	14:22517773_22534604	1864	0.000178986	2.34186	0.0100323
ENSRNOT00000041306	AABR07048992.1-201	5:99031012_99033107	2095	0.000185418	-6.69915	0.0103088
ENSRNOT00000083672	Akr1d1-202	4:65112943_65143941	3215	0.000187287	4.20503	0.0103997
ENSRNOT00000014924	Dlc1-201	16:59197366_59247754	6086	0.000188977	6.37753	0.0104806
ENSRNOT00000002366	Bdh1-201	11:72578532_72614176	2261	0.000190896	7.12756	0.0105673
ENSRNOT00000050289	LOC100360750-201	13:47380405_47382955	652	0.000191404	-2.20882	0.0105823
ENSRNOT00000092906	Aox3-204	9:65013861_65099433	4727	0.000192957	4.40786	0.010655
ENSRNOT00000024326	Mrto4-201	5:157815360_157820889	1355	0.000194395	-5.47021	0.0107013
ENSRNOT00000011326	Washc4-201	7:26311093_26361221	3809	0.000197218	7.72167	0.0108234
ENSRNOT00000080689	Kank1-202	1:243375980_243398527	1819	0.000199745	-13.5375	0.0109218
ENSRNOT00000067391	Mt2A-201	19:11307966_11308740	382	0.000200191	4.69346	0.0109328
ENSRNOT00000002260	Cldnd1-201	11:43986385_43992598	2006	0.000203616	12.65	0.0111074
ENSRNOT00000011371	Tax1bp1-201	4:82776745_82832582	2896	0.000203636	2.56604	0.0111074
ENSRNOT00000013580	Scrn2-201	10:84966988_84971009	1493	0.000204571	-3.26202	0.0111447
ENSRNOT00000026079	LOC100911730-201	1:214009783_214013761	1612	0.000205118	-4.58164	0.011161
ENSRNOT00000083912	RGD1564614-202	13:56890190_56958561	2400	0.000206478	6.94868	0.0112076
ENSRNOT00000003125	Tec-201	14:37919232_38027925	2616	0.000210518	2.93654	0.0113786
ENSRNOT00000005059	Wdr26-201	13:99493119_99531959	6088	0.000211338	10.2674	0.011409
ENSRNOT00000023741	Ctr9-201	1:175839107_175869165	4264	0.000219335	5.7162	0.0117697
ENSRNOT00000060111	Cfh-202	13:56979168_57080622	4318	0.000220767	4.32985	0.0118181
ENSRNOT00000077070	Dpt-203	13:83073549_83102401	2104	0.000228768	-10.6176	0.0121663
ENSRNOT00000087731	H1f2-201	17:43639748_43640387	639	0.000231129	-2.70039	0.0122699
ENSRNOT00000013159	LOC680121-201	11:13499163_13501263	2100	0.000231499	6.23151	0.0122757
ENSRNOT00000082172	Sh3bp5-201	16:7473369_7538201	2551	0.000238023	3.31088	0.0125835
ENSRNOT00000025534	C5-201	3:14050356_14229067	5043	0.000240993	8.4892	0.0127255
ENSRNOT00000023161	Med10-201	1:36107231_36112993	945	0.000242939	-2.0164	0.0127905
ENSRNOT00000018782	Zc3hav1-201	4:66011914_66062089	5081	0.000243105	7.38515	0.0127916
ENSRNOT00000046229	Pnkd-202	9:81566073_81634529	2877	0.000247939	-36.8268	0.0129848
ENSRNOT00000040325	Cyp2c7-201	1:148053686_148119857	1646	0.000249686	2.2205	0.0130534
ENSRNOT00000067780	Junb-201	19:26092973_26094756	1783	0.000250768	3.77882	0.0131022
ENSRNOT00000087928	Aldoa-202	1:198228386_198233215	1340	0.000252785	-6.21956	0.0131999
ENSRNOT00000078761	Ppp1cc-202	12:39864301_39882030	2375	0.000254666	3.97922	0.0132826
ENSRNOT00000054724	Cyp2c22-201	1:259257656_259287684	1709	0.000255464	-2.70178	0.0133087
ENSRNOT00000028781	Hjv-201	2:198655436_198659317	2118	0.000262769	-2.17371	0.0136336
ENSRNOT00000046313	Arntl-201	1:178039062_178137465	2973	0.000265323	16.4929	0.0137422
ENSRNOT00000013114	Mrpl10-201	10:84976376_84984780	1686	0.000266621	25.7699	0.0138014
ENSRNOT00000016733	Wdr18-201	7:12561323_12569143	1394	0.000267214	-2.13829	0.0138161
ENSRNOT00000040993	Mt-nd2-201	MT:3903_4942	1039	0.000272265	2.0065	0.0140366
ENSRNOT00000067843	LOC103691744-201	2:264266983_264293046	1813	0.000279074	2.13929	0.0143217
ENSRNOT00000042264	AABR07036375.1-201	12:40685889_40686249	360	0.000280793	-13.3429	0.014385
ENSRNOT00000016984	Vamp5-201	4:100231560_100232559	306	0.000282103	-36.7928	0.0144438
ENSRNOT00000014458	Pithd1-201	5:154322550_154332940	1416	0.000283561	-20.4562	0.0144742
ENSRNOT00000059426	LOC294154-201	20:7331325_7397448	3303	0.000283668	-35.1175	0.0144742
ENSRNOT00000082530	Sult1c3-202	9:4930817_4945352	1364	0.000286991	-3.73068	0.0146021
ENSRNOT00000071386	Ranbp2-202	20:28027053_28076664	10277	0.000291679	14.6603	0.0148153
ENSRNOT00000067574	Arhgef19-201	5:159755534_159773699	3648	0.000292341	-5.2759	0.0148236
ENSRNOT00000027537	Ech1-201	1:87009729_87016005	1174	0.000297116	28.3442	0.0150231
ENSRNOT00000091799	Crot-203	4:22082193_22116241	2691	0.000298314	6.14223	0.0150666
ENSRNOT00000065211	Hdgf-202	2:187281999_187284281	1260	0.000301526	-17.948	0.0152116
ENSRNOT00000089980	Ppie-202	5:140822140_140834959	1177	0.000302594	-3.4684	0.0152483
ENSRNOT00000024583	Zfand5-201	1:238843337_238852566	2147	0.000304411	2.15464	0.0153312
ENSRNOT00000084053	Lss-203	20:12842883_12855891	3125	0.000305646	-3.64492	0.0153847
ENSRNOT00000022603	Calm2-201	1:78843079_78851719	1112	0.00030593	-16.9275	0.0153904
ENSRNOT00000071152	Nktr-201	8:130366774_130393178	5003	0.000307522	5.96774	0.0154531
ENSRNOT00000087916	LOC100361907-201	13:56730396_56763981	1170	0.000313286	2.53506	0.0156547
ENSRNOT00000014300	Mbnl2-201	15:105640096_105797932	4577	0.000314537	5.44002	0.0156821
ENSRNOT00000024941	Ppp1r3c-201	1:255371809_255376833	2771	0.000315715	3.10313	0.0157123
ENSRNOT00000049540	LOC103690108-201	20:3791406_3793985	1047	0.000316022	12.7434	0.0157123
ENSRNOT00000088381	Pxmp2-202	12:52452330_52462659	692	0.000316022	-2.91339	0.0157123
ENSRNOT00000021569	Fzd7-201	9:66305730_66308550	2820	0.000316534	8.89451	0.015729
ENSRNOT00000011921	Ino80b-201	4:113954612_113957774	1142	0.000317124	-2.58976	0.0157408
ENSRNOT00000074209	Etnppl-201	2:235738415_235760352	4517	0.000318779	2.6441	0.0157952
ENSRNOT00000062052	Cast-202	2:1452115_1561464	4436	0.000319638	6.81252	0.0157952
ENSRNOT00000049798	Acox3-201	14:80314430_80355420	2594	0.000322359	3.33675	0.0158684
ENSRNOT00000051342	Akr1c2-201	17:69388346_69404323	1298	0.000324435	-10.3254	0.0159443
ENSRNOT00000088198	Ap2b1-202	10:70520205_70621965	5403	0.000326428	5.90022	0.0160246
ENSRNOT00000018622	Rbp1-201	8:106449320_106470842	696	0.000335338	-2.03461	0.016381
ENSRNOT00000045867	Ccl6-201	10:70797123_70802782	1374	0.000341049	8.89713	0.0166418
ENSRNOT00000003696	Pafah1b1-201	10:61457215_61577412	4364	0.000341818	6.87555	0.0166702
ENSRNOT00000001960	Tmem120a-201	12:23989595_23998254	1555	0.000342714	-2.14217	0.0167047
ENSRNOT00000087764	Tmem53-202	5:136117857_136127626	933	0.000347073	-2.16474	0.0168712
ENSRNOT00000047633	Rexo2-201	8:52802605_52814321	1183	0.000347612	20.0236	0.0168882
ENSRNOT00000088416	Gsta3-202	9:27408332_27417023	1146	0.000354924	-2.16687	0.017178
ENSRNOT00000010674	Yars1-201	5:147375349_147403571	2433	0.000359069	6.04056	0.0173411
ENSRNOT00000084782	Mat2a-202	4:100296074_100303080	3346	0.000360147	5.42345	0.0173664
ENSRNOT00000001402	Snrnp35-201	12:37531094_37538403	1107	0.000362671	-3.69009	0.0174679
ENSRNOT00000028434	Egln2-201	1:83969456_83977236	1987	0.00036304	-2.6584	0.0174762
ENSRNOT00000051319	Atp11c-201	X:143346251_143453612	3587	0.000376046	5.58476	0.0179571
ENSRNOT00000013581	Arih1-201	8:64166359_64268555	5112	0.000378902	3.54685	0.0180731
ENSRNOT00000093172	Mtch1-203	20:6937960_6960481	810	0.000381438	-2.27423	0.0181564
ENSRNOT00000090475	Sec24a-202	10:37139805_37209881	5115	0.000390274	3.37889	0.0184982
ENSRNOT00000005439	Pnn-201	6:80159363_80167677	2821	0.000400713	6.84779	0.0189427
ENSRNOT00000006154	Cox20-201	13:96219852_96224023	1028	0.00040936	-2.24273	0.0192598
ENSRNOT00000066058	Mmadhc-201	3:35783622_35801614	1403	0.000412813	6.48624	0.0193814
ENSRNOT00000085476	Eif4e2-204	9:94307851_94326898	1044	0.000415439	-2.33281	0.019476
ENSRNOT00000073792	Map2k3-201	10:45089463_45110787	2319	0.000415481	-2.65946	0.019476
ENSRNOT00000022105	Tm4sf4-201	2:147496228_147547252	1656	0.000417568	-2.31755	0.0195624
ENSRNOT00000017211	Tm9sf2-201	15:108526013_108579256	3088	0.000418457	3.77782	0.0195846
ENSRNOT00000078220	Tpp2-202	9:50581233_50744803	4564	0.000418939	5.38458	0.0195969
ENSRNOT00000085214	Eprs-202	13:103300931_103371577	4801	0.000424098	2.70316	0.0197864
ENSRNOT00000028752	Otub1-201	1:222451673_222459952	1687	0.000426212	-2.54892	0.0198643
ENSRNOT00000065978	Dhtkd1-201	17:76306584_76358058	4257	0.000433947	3.30481	0.0201456
ENSRNOT00000019756	Elovl2-201	17:21382454_21422407	3803	0.00044006	5.58002	0.0203359
ENSRNOT00000071726	Smlr1-201	1:20856186_20877716	563	0.0004402	-2.03166	0.0203359
ENSRNOT00000086820	Ggcx-203	4:100277390_100293250	1399	0.000443859	-3.04089	0.0204838
ENSRNOT00000028743	Stip1-201	1:222274132_222293148	2101	0.000446035	2.60468	0.020563
ENSRNOT00000065232	AABR07057436.1-202	7:71125470_71139267	753	0.000454653	-2.39075	0.0208956
ENSRNOT00000079504	AABR07030184.1-201	10:74765384_74765600	216	0.000457363	-21.1385	0.0209877
ENSRNOT00000026588	Hacl1-201	16:7714464_7758189	5827	0.000462094	3.75218	0.0211505
ENSRNOT00000005685	Zbtb39-201	7:71036564_71044045	5815	0.0004641	4.27428	0.0212206
ENSRNOT00000012767	Zrsr1-201	14:107750161_107751892	1731	0.000466604	4.31806	0.0213024
ENSRNOT00000057475	Dusp11-201	4:117617532_117631716	1283	0.0004675	2.44957	0.0213324
ENSRNOT00000071270	LOC102549542-201	2:234375314_234483149	2501	0.000469016	-3.52426	0.0213739
ENSRNOT00000027234	Slc16a1-201	2:207108551_207128554	2487	0.00047241	4.43838	0.0214937
ENSRNOT00000002640	Cldn1-201	11:77815180_77830416	3301	0.000472784	4.35327	0.0214966
ENSRNOT00000022373	Tut7-201	17:5225834_5271794	5240	0.000474485	7.18482	0.021563
ENSRNOT00000064542	Jak1-201	5:119982942_120083904	4291	0.000474776	12.398	0.0215652
ENSRNOT00000068093	Snrnp27-202	4:118478074_118487633	873	0.000480031	-2.21145	0.0217487
ENSRNOT00000027738	Prpf38b-201	2:211706227_211715311	3051	0.000482582	3.67806	0.0218139
ENSRNOT00000040637	Slc16a2-201	X:74577130_74706214	3251	0.00048519	8.09513	0.0219108
ENSRNOT00000000627	Srsf3-201	20:6288266_6298213	2884	0.000485492	-2.76631	0.0219108
ENSRNOT00000071925	RGD1309350-201	1:213577121_213580542	863	0.000487457	73.1986	0.0219515
ENSRNOT00000041495	Rnase4-201	15:28018039_28035389	1335	0.000501652	2.85196	0.0224466
ENSRNOT00000044944	Gsta5-201	8:85553733_85565179	1035	0.000503091	-2.21266	0.0224706
ENSRNOT00000077742	Ece1-202	5:156215433_156318648	4469	0.000506966	15.7994	0.0225685
ENSRNOT00000025104	Rab6a-201	1:165625057_165664192	3371	0.000509429	5.44981	0.0226491
ENSRNOT00000008018	Suox-201	7:3098244_3102142	2192	0.000509802	59.828	0.0226491
ENSRNOT00000065926	Lyrm2-201	5:48047912_48050187	1548	0.000510299	4.28637	0.0226491
ENSRNOT00000070903	RT1-T24-3-201	20:3226359_3233694	1216	0.000511247	-3.49016	0.0226799
ENSRNOT00000004351	Slc9a3r1-201	10:103713044_103730145	1492	0.000511998	-30.9033	0.0227019
ENSRNOT00000014785	Itgb1-201	19:61677541_61725535	3658	0.000514515	5.53708	0.0228022
ENSRNOT00000046754	Acox1-202	10:104722957_104748050	3848	0.000519476	3.50331	0.0229879
ENSRNOT00000074644	Larp7-202	2:231873141_231881939	1437	0.000520628	-2.28761	0.0230275
ENSRNOT00000020401	Tent5c-201	2:202798197_202816562	2023	0.000527597	10.3314	0.0232207
ENSRNOT00000031796	Cdk4-201	7:70349862_70352418	912	0.000543911	-2.33316	0.0237632
ENSRNOT00000023628	Hspa4-201	10:38601623_38642397	4520	0.000549369	3.33311	0.0239548
ENSRNOT00000028555	Rpl18-201	1:101701974_101703550	613	0.000555599	-8.94808	0.0241675
ENSRNOT00000087003	Trappc1-202	10:55924937_55926783	901	0.00055618	-2.19845	0.0241692
ENSRNOT00000049520	Gm5471-201	5:21043449_21043791	342	0.000558761	-9.03921	0.024246
ENSRNOT00000013463	Asah1-201	16:53998603_54030005	2262	0.000567658	4.11886	0.024565
ENSRNOT00000024141	Nqo2-201	17:32132346_32158538	1372	0.000570735	25.1641	0.0246774
ENSRNOT00000078005	Sugp1-201	16:21100923_21131795	2076	0.000573542	-2.901	0.0247312
ENSRNOT00000028222	LOC103690054-201	1:88686730_88688258	889	0.000577032	-2.1617	0.0248117
ENSRNOT00000015011	Tmem254-201	16:3817401_3821270	1184	0.000584452	-2.14213	0.0250445
ENSRNOT00000005306	Cfap36-201	14:113618963_113644779	1436	0.000586189	-25.6257	0.0250784
ENSRNOT00000086306	Coq8a-202	13:98451941_98480419	2249	0.000586728	5.16611	0.0250784
ENSRNOT00000020206	Slc25a25-201	3:11442396_11452529	3135	0.000587207	7.71405	0.0250784
ENSRNOT00000035280	Med13-201	10:73702326_73787083	7024	0.000589819	11.4376	0.0251539
ENSRNOT00000075588	Tspan4-201	1:214016896_214038723	3585	0.000604322	-4.22305	0.0256378
ENSRNOT00000026385	Ramac-201	1:143583674_143589556	791	0.000607727	-2.14487	0.0257333
ENSRNOT00000010171	Nr4a1-201	7:142912315_142920216	2484	0.000622706	10.0842	0.0262358
ENSRNOT00000082978	Scarna2-201	2:211344016_211344432	416	0.000623563	-3.92697	0.0262422
ENSRNOT00000011999	Phlda3-201	13:52588916_52592001	1423	0.000645718	-2.3648	0.0270277
ENSRNOT00000005170	Ppp4r3b-201	14:113570149_113618138	5014	0.000645858	6.05409	0.0270277
ENSRNOT00000072509	Cox19-201	12:17395623_17405103	2648	0.000647632	-13.3432	0.0270766
ENSRNOT00000091749	Slc17a3-204	17:43518654_43537293	2384	0.00065767	-5.96411	0.0273937
ENSRNOT00000072416	Mphosph6-201	19:50357337_50367187	1062	0.000662488	22.2267	0.0275559
ENSRNOT00000004319	Degs1-201	13:100666074_100672731	1437	0.000673028	2.07126	0.0279422
ENSRNOT00000064910	Rnf10-201	12:47103313_47138128	4100	0.000679242	3.46634	0.0281479
ENSRNOT00000085226	AC106292.2-201	11:65743891_65745038	1147	0.000679595	3.56489	0.0281495
ENSRNOT00000079941	LOC103694879-201	KL568423.1:500_1430	546	0.000686875	-21.0796	0.0283736
ENSRNOT00000021750	Tshz1-201	18:80862371_80865584	3213	0.000686911	4.18482	0.0283736
ENSRNOT00000064596	Eloa-201	5:154347390_154363329	3491	0.000694514	20.2457	0.0286083
ENSRNOT00000000467	Nus1-201	20:33557051_33584010	3644	0.000697512	2.97654	0.0287185
ENSRNOT00000007583	Srsf5-201	6:104611025_104615302	1180	0.000710156	-2.5769	0.0291585
ENSRNOT00000090666	Dmgdh-202	2:23289373_23370477	3200	0.000713172	-5.76481	0.0292689
ENSRNOT00000080335	F13b-202	13:56598978_56622782	1986	0.00071591	2.8151	0.0293543
ENSRNOT00000072188	LOC100911854-201	1:248723396_248729962	1727	0.000726725	2.0886	0.0296752
ENSRNOT00000015250	Smap2-201	5:139885325_139931366	2839	0.000728903	3.91705	0.0297234
ENSRNOT00000002447	AC133403.1-201	11:70056623_70067091	1758	0.000734724	-2.31991	0.0299197
ENSRNOT00000044465	AABR07054189.1-201	3:143828610_143829156	546	0.000747107	-4.22669	0.0303686
ENSRNOT00000087215	Tmf1-202	4:129521990_129544506	3440	0.000748138	3.09777	0.0303829
ENSRNOT00000030837	Parl-201	11:84517367_84544462	1317	0.000752488	-16.073	0.0305041
ENSRNOT00000090051	Atp5mc2-202	7:144264198_144269486	626	0.000776051	-4.92705	0.0312044
ENSRNOT00000035770	Rbbp6-201	1:192933539_192965158	5975	0.000786748	8.15367	0.0315777
ENSRNOT00000018009	Prkcsh-201	8:23014955_23026503	1975	0.000790632	32.2825	0.0317193
ENSRNOT00000068433	Myo1b-201	9:54558201_54766054	3609	0.000791365	2.42395	0.0317345
ENSRNOT00000024815	Dnph1-201	9:16845524_16848503	773	0.000800221	-2.77389	0.0319748
ENSRNOT00000084018	Tbx3-202	12:42480559_42492526	2962	0.000806714	9.16511	0.0321624
ENSRNOT00000028195	Dhcr7-201	1:217018915_217034890	2735	0.000807182	3.60785	0.0321667
ENSRNOT00000022810	Hfe-202	17:43661275_43669327	1106	0.000809363	-10.3458	0.0322248
ENSRNOT00000043005	LOC100363469-201	10:78992579_78993045	466	0.000819161	-4.22096	0.0325135
ENSRNOT00000092741	Klc1-203	6:136358056_136373721	555	0.000820808	-20.4839	0.0325355
ENSRNOT00000010224	Ptp4a3-201	7:114997102_115002902	1327	0.000825738	-7.48923	0.0326585
ENSRNOT00000006357	Creld2-201	7:129812788_129819634	1342	0.000829249	5.02852	0.0327539
ENSRNOT00000017174	Nqo1-201	19:38422163_38437180	1579	0.0008334	-2.57796	0.0328475
ENSRNOT00000070805	Tomm6-201	9:15313522_15314435	225	0.000842568	-54.9491	0.0331626
ENSRNOT00000024012	Wdr1-201	14:76989918_77023726	2895	0.000854395	3.59705	0.0335248
ENSRNOT00000025531	Aurkaip1-201	5:173256636_173275340	2011	0.000857519	2.97511	0.0336178
ENSRNOT00000030569	Chordc1-201	8:17421556_17446165	3211	0.000871158	2.34837	0.034048
ENSRNOT00000028033	G6pc-201	10:89285854_89296213	2423	0.000876733	4.10253	0.034206
ENSRNOT00000015281	Aldh1b1-201	5:61382350_61387358	2196	0.000879451	-2.92926	0.0342671
ENSRNOT00000081444	Ly6c-201	KL567988.1:20092_23908	853	0.000882747	-4.02457	0.0343806
ENSRNOT00000087257	Cyp3a23/3a1-202	12:11655401_11733136	2059	0.000894684	-4.02073	0.0347736
ENSRNOT00000055735	Agl-201	2:219788233_219842986	7567	0.000894784	4.99149	0.0347736
ENSRNOT00000078080	Cyp2e1-202	1:213511873_213535542	2014	0.000899226	-4.30914	0.0348855
ENSRNOT00000020380	Hdhd3-201	5:78358202_78361647	1181	0.000901236	-2.95133	0.0349332
ENSRNOT00000079333	Card6-202	2:54810109_54824033	6577	0.00090327	8.80345	0.0349968
ENSRNOT00000027700	Pklr-201	2:188449209_188456759	1725	0.000906171	-3.05186	0.035094
ENSRNOT00000025626	Ccdc124-201	16:20317445_20323265	1607	0.000907512	-3.62333	0.0351307
ENSRNOT00000025291	Ugt1a6-202	9:95256626_95302822	2267	0.00091312	2.31283	0.0352867
ENSRNOT00000080794	Abhd6-202	15:18647843_18675431	2213	0.000927913	-4.01084	0.0357964
ENSRNOT00000001081	Smpdl3a-201	20:40778926_40800868	1782	0.000935211	2.51456	0.0360623
ENSRNOT00000085439	RGD1307603-202	1:219309591_219311502	652	0.000940163	-2.33575	0.036222
ENSRNOT00000014859	Ipo5-201	15:106257649_106292112	3294	0.000940875	13.5909	0.0362338
ENSRNOT00000085012	Shld2-201	16:10570313_10661528	3354	0.000943249	4.59681	0.0363063
ENSRNOT00000067462	Crot-201	4:22081603_22116265	2684	0.000952007	3.45591	0.0365352
ENSRNOT00000086441	LOC108348175-203	1:50828584_50933516	1020	0.000957457	5.4571	0.0366984
ENSRNOT00000011340	Slc22a5-201	10:39201106_39228090	3017	0.000963022	6.60992	0.0368327
ENSRNOT00000012775	Pabpc1-201	7:75409580_75421874	2190	0.000972477	49.3561	0.037099
ENSRNOT00000039281	Cabp1-203	12:47193963_47209784	928	0.000974365	-18.805	0.0371336
ENSRNOT00000055893	LOC108351584-201	7:127081425_127081704	279	0.000974629	-4.32747	0.0371336
ENSRNOT00000021864	Camk2n1-201	5:156876705_156878486	409	0.000979918	-3.7539	0.0373192
ENSRNOT00000052231	Rpl9-201	1:77829710_77830399	689	0.000980544	-2.22758	0.0373235
ENSRNOT00000010760	Mettl7b-201	7:3383878_3386522	1264	0.000984034	-2.19824	0.037374
ENSRNOT00000039102	Tfeb-201	9:15207821_15214596	2358	0.000985122	-10.7269	0.037374
ENSRNOT00000061883	Zcchc24-201	16:1996539_2048292	4423	0.000985122	17.6841	0.037374
ENSRNOT00000058092	Ap2m1-201	11:84041183_84047546	1800	0.000987336	13.81	0.0374421
ENSRNOT00000001438	Kdelr2-201	12:13192452_13210758	1791	0.00099305	-5.95767	0.0376352
ENSRNOT00000046110	Srr-201	10:61756137_61772293	2027	0.000995981	4.46662	0.0376793
ENSRNOT00000086122	Ppp1r12c-201	1:72903256_72926108	2910	0.000996297	13.3916	0.0376793
ENSRNOT00000083668	Mocs2-202	2:46980975_46992883	1467	0.000996544	-3.88484	0.0376793

## Sheet: CT vs. H120
The known differentially expressed mRNA isoforms (P < 0.001, FDR < 0.05, |FC| > 2) identified in liver in CT vs. H120.
Transcript ID	Transcript Name	Gene ID	Position	Transcript length (bp*)	P-value	FC	FDR
ENSRNOT00000092476	Rps18-204	ENSRNOG00000028505.6	20:5441875_5445550	544	0	-3.08292	0
ENSRNOT00000068323	Rps28-201	ENSRNOG00000042886.1	7:18682070_18683440	339	0	-3.13	0
ENSRNOT00000051693	AC141489.1-201	ENSRNOG00000033916.4	5:159606646_159606989	343	0	-3.28537	0
ENSRNOT00000048198	LOC108348287-201	ENSRNOG00000031022.5	18:1504177_1505570	493	0	-2.7559	0
ENSRNOT00000032015	Ifi27l2b-201	ENSRNOG00000026605.5	6:127336304_127337791	451	0	-5.72948	0
ENSRNOT00000074685	Dbi-202	ENSRNOG00000046889.3	13:36147667_36156076	565	1.03467e-89	-4386.08	1.54071e-85
ENSRNOT00000034843	Tsku-201	ENSRNOG00000027784.4	1:163317281-163328591	2573	5.55748e-24	-6.5366	5.94831e-20
ENSRNOT00000084642	Ahsa2-201	ENSRNOG00000052142.1	14:108265206-108273938	1259	6.54242e-22	14.6887	6.22446e-18
ENSRNOT00000004797	Tuba4a-201	ENSRNOG00000003597.5	9:82415604-82419288	1448	1.83683e-17	-3.64649	9.25179e-14
ENSRNOT00000065791	Pklr-202	ENSRNOG00000020420.6	2:188449717-188459592	5007	8.47979e-17	-6.85294	3.63045e-13
ENSRNOT00000064340	Gk-202	ENSRNOG00000034116.6	X:54227396-54303825	4107	8.18109e-16	8.81509	2.80206e-12
ENSRNOT00000001201	Hsph1-201	ENSRNOG00000000902.7	12:6322667-6341902	3446	1.58877e-15	12.0137	4.98592e-12
ENSRNOT00000028546	Dbp-201	ENSRNOG00000021027.6	1:101687854-101692846	1702	8.92308e-15	-21.108	2.46467e-11
ENSRNOT00000075493	Fabp5-201	ENSRNOG00000049075.2	2:93981655-93985378	723	3.99955e-14	-6.70201	9.01226e-11
ENSRNOT00000046590	Ei24-201	ENSRNOG00000030391.4	8:39254888-39266959	2010	6.54314e-14	2.8369	1.40066e-10
ENSRNOT00000077177	Igfbp1-201	ENSRNOG00000058780.1	14:87448691-87453785	1528	4.66513e-13	5.38543	8.32201e-10
ENSRNOT00000014073	LOC299282-202	ENSRNOG00000010478.7	6:128073343-128080878	2057	1.30238e-12	4.8317	2.06514e-09
ENSRNOT00000043533	Kynu-201	ENSRNOG00000029993.5	3:28416953-28566928	1804	2.06084e-12	3.29444	3.20839e-09
ENSRNOT00000003412	Litaf-201	ENSRNOG00000002520.5	10:4719712-4763510	2238	3.51186e-12	5.31691	5.09672e-09
ENSRNOT00000015767	Pnpla3-201	ENSRNOG00000022268.6	7:125034763-125055976	3215	4.14736e-12	-19.5842	5.91869e-09
ENSRNOT00000029845	Tmem140-201	ENSRNOG00000026965.6	4:62380913-62391912	1371	9.99125e-12	3.23889	1.29623e-08
ENSRNOT00000091597	Dbp-202	ENSRNOG00000021027.6	1:101687895-101692845	1249	1.23971e-11	-20.1576	1.51613e-08
ENSRNOT00000086310	Hsp90aa1-201	ENSRNOG00000059714.1	6:135107270-135112775	2758	1.21653e-11	4.22412	1.51613e-08
ENSRNOT00000000058	Crp-201	ENSRNOG00000000053.7	13:91080340-91081629	1071	1.23341e-11	5.01795	1.51613e-08
ENSRNOT00000065729	LOC100910882-201	ENSRNOG00000049814.2	3:152226709-152259156	1977	2.74864e-11	81.8314	3.13807e-08
ENSRNOT00000033408	Acat2-201	ENSRNOG00000019189.7	1:47972398-47992653	2027	3.82494e-11	-3.81154	4.1989e-08
ENSRNOT00000006239	Dazap2-201	ENSRNOG00000004628.7	7:142239034-142243241	858	4.27198e-11	91.1441	4.63029e-08
ENSRNOT00000016540	Thrsp-201	ENSRNOG00000012404.6	1:162381252-162385575	1232	4.78912e-11	-3.98441	5.12592e-08
ENSRNOT00000070861	Abcc2-201	ENSRNOG00000046727.2	1:263554452-263613252	5721	8.78085e-11	2.79971	8.87708e-08
ENSRNOT00000007371	Apob-201	ENSRNOG00000005542.8	6:33176825-33216378	14073	8.81218e-11	9.37094	8.87708e-08
ENSRNOT00000065978	Dhtkd1-201	ENSRNOG00000023587.7	17:76306584-76358058	4257	2.75827e-10	3.71486	2.4602e-07
ENSRNOT00000033450	Tuba1c-201	ENSRNOG00000021438.3	7:140716112-140723714	1533	3.02931e-10	-2.24784	2.6741e-07
ENSRNOT00000087664	Pigr-202	ENSRNOG00000004405.5	13:47572220-47591699	3509	4.43973e-10	19.4706	3.76392e-07
ENSRNOT00000020380	Hdhd3-201	ENSRNOG00000015195.6	5:78358202-78361647	1181	7.66514e-10	-4.4898	6.07718e-07
ENSRNOT00000028743	Stip1-201	ENSRNOG00000021164.7	1:222274132-222293148	2101	1.45708e-09	3.40151	1.09677e-06
ENSRNOT00000031555	Hspb1-201	ENSRNOG00000023546.5	12:23839398-23841049	879	1.5376e-09	15.3973	1.14486e-06
ENSRNOT00000009398	Timm17a-201	ENSRNOG00000007040.4	13:52124634-52136127	904	1.71306e-09	-3.15338	1.2645e-06
ENSRNOT00000000525	RT1-Bb-201	ENSRNOG00000032708.5	20:4043740-4049711	1844	1.86243e-09	5.60086	1.36301e-06
ENSRNOT00000031586	Pck1-201	ENSRNOG00000028616.6	3:171213935-171219871	2621	2.4184e-09	11.0358	1.69736e-06
ENSRNOT00000027170	Mcrip2-201	ENSRNOG00000020029.5	10:15230800-15235740	820	2.88115e-09	-3.70117	1.98953e-06
ENSRNOT00000039275	Hspb8-201	ENSRNOG00000022392.3	12:45905370-45920013	1773	3.85604e-09	3.08732	2.57951e-06
ENSRNOT00000046951	Ghr-202	ENSRNOG00000015654.8	2:53150369-53313884	2941	4.38518e-09	4.4261	2.91074e-06
ENSRNOT00000025845	Lipa-201	ENSRNOG00000019077.5	1:252816537-252849756	3202	5.52501e-09	5.97873	3.58397e-06
ENSRNOT00000083677	Zfp36l1-201	ENSRNOG00000058646.1	6:103308044-103313074	2728	6.86059e-09	4.10582	4.24093e-06
ENSRNOT00000039002	Slc38a2-201	ENSRNOG00000006305.5	7:138088648-138100841	4635	7.25418e-09	8.22479	4.43676e-06
ENSRNOT00000005383	Dusp1-201	ENSRNOG00000003977.5	10:16970625-16973418	1936	7.51595e-09	10.3713	4.55582e-06
ENSRNOT00000022983	Serpinh1-201	ENSRNOG00000016831.6	1:164301009-164308317	2052	9.46934e-09	3.72295	5.5158e-06
ENSRNOT00000005837	Phf5a-201	ENSRNOG00000024170.5	7:123095287-123101869	873	1.05865e-08	84.1319	6.08376e-06
ENSRNOT00000028149	Nbr1-201	ENSRNOG00000020730.7	10:89459649-89483785	4166	1.28559e-08	3.84892	7.29005e-06
ENSRNOT00000015316	Inmt-201	ENSRNOG00000011250.6	4:85381888-85386231	1108	1.3182e-08	-48.4245	7.37728e-06
ENSRNOT00000013244	Me1-201	ENSRNOG00000009715.6	8:94256838-94352246	2995	1.41763e-08	-4.75619	7.73161e-06
ENSRNOT00000028095	Pmvk-201	ENSRNOG00000020696.5	2:188784221-188793895	1092	1.5857e-08	-2.30954	8.48606e-06
ENSRNOT00000067780	Junb-201	ENSRNOG00000042838.3	19:26092973-26094756	1783	2.01152e-08	4.58924	1.03137e-05
ENSRNOT00000016330	C1s-201	ENSRNOG00000011971.8	4:157143591-157155609	2912	2.25569e-08	2.27999	1.14287e-05
ENSRNOT00000048198	LOC108348287-201	ENSRNOG00000031022.5	18:1504177-1505570	493	2.28859e-08	-2.02242	1.15272e-05
ENSRNOT00000071712	Srm-201	ENSRNOG00000046379.2	3:14588869-14591974	1196	2.49344e-08	-9.45543	1.2413e-05
ENSRNOT00000002450	Umps-201	ENSRNOG00000001797.6	11:70034138-70044628	1686	2.61276e-08	-2.48528	1.2784e-05
ENSRNOT00000057830	Commd6-201	ENSRNOG00000038012.2	15:86136095-86142672	909	2.65663e-08	-2.79187	1.28518e-05
ENSRNOT00000079106	Dnajb1-202	ENSRNOG00000021824.5	19:24747215-24750904	2191	3.04518e-08	7.38202	1.44059e-05
ENSRNOT00000028102	Tkfc-201	ENSRNOG00000020704.5	1:226644199-226657408	2369	3.10961e-08	-2.88668	1.45499e-05
ENSRNOT00000007583	Srsf5-201	ENSRNOG00000005513.7	6:104611025-104615302	1180	3.17222e-08	-4.15415	1.47622e-05
ENSRNOT00000059426	LOC294154-201	ENSRNOG00000038883.4	20:7331325-7397448	3303	3.25147e-08	-2.32349	1.50009e-05
ENSRNOT00000018145	Mvd-201	ENSRNOG00000013376.6	19:55258904-55268951	1697	3.85638e-08	-2.96876	1.72883e-05
ENSRNOT00000036435	Slc28a2-202	ENSRNOG00000028668.6	3:114355813-114378941	1980	4.18007e-08	5.62004	1.86418e-05
ENSRNOT00000026057	Acsl4-201	ENSRNOG00000019180.6	X:113596238-113659944	4951	4.88833e-08	3.54109	2.07827e-05
ENSRNOT00000013100	Poldip2-201	ENSRNOG00000009252.7	10:65780493-65790272	1382	5.12361e-08	76.4576	2.16115e-05
ENSRNOT00000057585	Fn1-202	ENSRNOG00000014288.8	9:78900102-78969078	8136	5.74555e-08	3.23912	2.3882e-05
ENSRNOT00000086530	Pex16-203	ENSRNOG00000006539.7	3:81287241-81292573	1221	6.0936e-08	-2.15943	2.49651e-05
ENSRNOT00000012760	Pdk4-201	ENSRNOG00000009565.4	4:30546663-30556814	1573	7.84626e-08	5.3721	3.06778e-05
ENSRNOT00000092865	C5-203	ENSRNOG00000018899.8	3:14207043-14229080	886	1.10337e-07	8.26327	4.13922e-05
ENSRNOT00000016954	Cpt2-201	ENSRNOG00000012443.5	5:127505613-127523089	2401	1.12944e-07	-2.44286	4.20476e-05
ENSRNOT00000076951	Acat2l1-202	ENSRNOG00000013975.7	1:47996520-48026268	1975	1.15447e-07	-3.19162	4.26088e-05
ENSRNOT00000019787	Lbp-201	ENSRNOG00000014532.2	3:154786214-154813464	2428	1.19712e-07	2.85976	4.38054e-05
ENSRNOT00000029626	Slc17a3-201	ENSRNOG00000032745.5	17:43518760-43543185	2278	1.21145e-07	2.01498	4.41411e-05
ENSRNOT00000016352	Ddi2-201	ENSRNOG00000012274.8	5:160236951-160282810	3522	1.22058e-07	25.8205	4.42855e-05
ENSRNOT00000024054	Slc2a5-201	ENSRNOG00000017693.7	5:167142181-167174203	2167	1.57933e-07	-5.19734	5.61127e-05
ENSRNOT00000009683	Nr0b2-201	ENSRNOG00000007229.2	5:151776003-151779319	1111	1.62388e-07	-5.44839	5.74572e-05
ENSRNOT00000019192	Hmox1-201	ENSRNOG00000014117.7	19:14508615-14515456	1566	2.10709e-07	4.22499	7.30453e-05
ENSRNOT00000064091	Fga-201	ENSRNOG00000024848.7	2:182006241-182013763	2725	2.22418e-07	2.01275	7.6485e-05
ENSRNOT00000036993	Adh6-201	ENSRNOG00000012436.6	2:243656578-243687857	1854	2.34201e-07	2.78268	7.92861e-05
ENSRNOT00000045870	Sel1l-202	ENSRNOG00000004464.7	6:115572648-115616859	6402	2.41923e-07	6.73098	8.09177e-05
ENSRNOT00000067843	LOC103691744-201	ENSRNOG00000010658.6	2:264266983-264293046	1813	2.44045e-07	2.87635	8.13098e-05
ENSRNOT00000016207	Mrps24-201	ENSRNOG00000011979.6	14:85947764-85951891	786	2.94485e-07	-33.3591	9.40881e-05
ENSRNOT00000060607	C2-201	ENSRNOG00000051235.1	20:4542339-4561152	2604	3.00508e-07	3.3276	9.56555e-05
ENSRNOT00000013605	Slc27a2-201	ENSRNOG00000010128.7	3:119015411-119052222	1854	3.02544e-07	2.75287	9.59467e-05
ENSRNOT00000003586	Cacybp-201	ENSRNOG00000002572.5	13:77948770-77959089	1526	3.39428e-07	2.25557	0.000105304
ENSRNOT00000085725	Tmem30a-202	ENSRNOG00000010895.6	8:87224340-87245774	1291	3.84297e-07	52.4639	0.000116687
ENSRNOT00000043822	Abcb4-203	ENSRNOG00000008012.7	4:22134804-22192474	3912	3.8223e-07	4.08236	0.000116687
ENSRNOT00000011333	Rps7-201	ENSRNOG00000008551.7	6:47899557-47904163	585	4.50775e-07	-366.749	0.00013297
ENSRNOT00000024423	Fmo5-201	ENSRNOG00000018076.5	2:199796880-199823927	2240	4.6037e-07	4.0903	0.000134999
ENSRNOT00000022824	Chka-201	ENSRNOG00000016791.8	1:219077770-219126220	2530	4.85298e-07	3.87434	0.000140861
ENSRNOT00000071913	Atp5f1e-201	ENSRNOG00000049912.2	3:172563104-172566010	375	5.09385e-07	-939.122	0.000144426
ENSRNOT00000088449	Pigr-203	ENSRNOG00000004405.5	13:47572218-47591596	3240	5.79859e-07	7.40718	0.000162258
ENSRNOT00000048746	Cpn2-201	ENSRNOG00000024384.5	11:74057360-74067413	2235	6.43726e-07	5.16239	0.00017896
ENSRNOT00000011808	Tmem97-201	ENSRNOG00000022657.3	10:65811455-65820538	1241	6.49739e-07	-3.54231	0.000180047
ENSRNOT00000067700	Slc27a2-202	ENSRNOG00000010128.7	3:119014619-119052531	2955	7.52959e-07	2.68948	0.000206644
ENSRNOT00000019106	Xylb-201	ENSRNOG00000014168.7	8:128044083-128076946	3384	8.30036e-07	2.33597	0.000224913
ENSRNOT00000071270	LOC102549542-201	ENSRNOG00000048949.1	2:234375314-234483149	2501	8.58756e-07	-4.06898	0.000230507
ENSRNOT00000064114	Higd1a-201	ENSRNOG00000019428.7	8:130482492-130491998	1524	8.93608e-07	-2.45347	0.000239113
ENSRNOT00000046754	Acox1-202	ENSRNOG00000008755.8	10:104722957-104748050	3848	9.75112e-07	3.33598	0.000258498
ENSRNOT00000093034	Grhpr-204	ENSRNOG00000012794.8	5:60529086-60538188	1119	1.01908e-06	109.267	0.00026932
ENSRNOT00000087062	Enpep-201	ENSRNOG00000051854.1	2:233667253-233743866	3799	1.14699e-06	4.05013	0.000298784
ENSRNOT00000029435	Hsp90b1-201	ENSRNOG00000026963.6	7:27226568-27240528	2799	1.3485e-06	3.66963	0.000336638
ENSRNOT00000074649	Ube2h-201	ENSRNOG00000048205.2	4:57511417-57625147	4266	1.37448e-06	3.41121	0.000342125
ENSRNOT00000002640	Cldn1-201	ENSRNOG00000001926.6	11:77815180-77830416	3301	1.39122e-06	5.11788	0.000343681
ENSRNOT00000073792	Map2k3-201	ENSRNOG00000049132.2	10:45089463-45110787	2319	1.43291e-06	-2.63639	0.00035257
ENSRNOT00000044613	Hyou1-201	ENSRNOG00000010944.6	8:48699768-48711910	4686	1.46192e-06	6.32361	0.000357653
ENSRNOT00000015851	Acy1-201	ENSRNOG00000011189.5	8:115134764-115140080	1576	1.53349e-06	-2.13736	0.000371974
ENSRNOT00000000627	Srsf3-201	ENSRNOG00000000520.8	20:6288266-6298213	2884	1.61812e-06	-4.31053	0.000388103
ENSRNOT00000056100	Rtp3-201	ENSRNOG00000037167.2	8:119260617-119265157	1958	1.72344e-06	-2.6868	0.000403201
ENSRNOT00000024658	Slc28a2-201	ENSRNOG00000028668.6	3:114355797-114647382	2627	1.91681e-06	2.83149	0.000436512
ENSRNOT00000027260	Atf5-201	ENSRNOG00000020060.4	1:100808240-100810522	1030	1.9341e-06	-195.015	0.000439282
ENSRNOT00000012141	Pdrg1-201	ENSRNOG00000008845.5	3:148487058-148493225	1192	1.97447e-06	39.2157	0.000443287
ENSRNOT00000009467	Pzp-201	ENSRNOG00000006709.6	4:161804783-161850875	4708	2.09026e-06	3.88851	0.000460105
ENSRNOT00000020335	Ptgr1-201	ENSRNOG00000015072.6	5:76110737-76129441	1232	2.11687e-06	-2.0534	0.000464768
ENSRNOT00000089936	Aurkaip1-203	ENSRNOG00000018691.7	5:173256833-173263334	1122	2.23387e-06	4.28087	0.000487641
ENSRNOT00000032015	Ifi27l2b-201	ENSRNOG00000026605.5	6:127336304-127337791	451	2.31536e-06	-2.01193	0.000497309
ENSRNOT00000010031	Angptl4-201	ENSRNOG00000007545.6	7:18627807-18634079	1888	2.32063e-06	2.40111	0.000497309
ENSRNOT00000055281	Nfe2-201	ENSRNOG00000036837.3	7:144872746-144880092	1652	2.39111e-06	-7.14221	0.000508042
ENSRNOT00000019795	Sigmar1-201	ENSRNOG00000014604.6	5:58121785-58124681	1672	2.60508e-06	2.87757	0.000548065
ENSRNOT00000023447	Acly-201	ENSRNOG00000016924.8	10:88392247-88442845	4327	2.61695e-06	-4.61554	0.000549212
ENSRNOT00000004864	Fmo3-201	ENSRNOG00000003620.5	13:80837419-80862963	2526	2.89096e-06	2.16328	0.000596485
ENSRNOT00000057422	Man1a1-201	ENSRNOG00000000800.7	20:35258950-35449280	3857	3.02309e-06	8.50321	0.000620756
ENSRNOT00000019059	Idh2-201	ENSRNOG00000013949.7	1:141874357-141893674	1668	3.09733e-06	-2.10925	0.000634479
ENSRNOT00000022056	Il33-201	ENSRNOG00000016456.7	1:248132089-248147029	2446	3.17024e-06	-2.20729	0.000647865
ENSRNOT00000025045	Ugt1a6-201	ENSRNOG00000018740.8	9:95295700-95302822	2259	3.73904e-06	2.20312	0.000742828
ENSRNOT00000020049	Pnkd-201	ENSRNOG00000014806.7	9:81615252-81634531	2797	3.97694e-06	5.90935	0.00078103
ENSRNOT00000015281	Aldh1b1-201	ENSRNOG00000011497.4	5:61382350-61387358	2196	3.99115e-06	-2.83496	0.000782028
ENSRNOT00000022348	Rps23-201	ENSRNOG00000016580.6	2:19823233-19824804	510	4.16306e-06	-514.38	0.000808313
ENSRNOT00000013073	Akr1b8-201	ENSRNOG00000009734.4	4:61772063-61784637	993	4.19588e-06	12.2891	0.000811008
ENSRNOT00000008356	Calu-201	ENSRNOG00000006197.7	4:56625560-56653105	3210	4.62259e-06	13.6016	0.000875694
ENSRNOT00000067643	A1cf-201	ENSRNOG00000033195.6	1:250426157-250514866	4350	4.6767e-06	23.1998	0.000882042
ENSRNOT00000088623	Plxnb2-202	ENSRNOG00000007133.7	7:130135463-130151880	6350	4.71527e-06	4.63076	0.00088593
ENSRNOT00000019386	Sdc4-201	ENSRNOG00000014297.3	3:160872502-160891190	2488	4.72836e-06	2.69949	0.00088593
ENSRNOT00000044690	Irx1-201	ENSRNOG00000033609.4	1:33910911-33916741	2345	4.80477e-06	-4.28037	0.000893227
ENSRNOT00000026355	Cyp8b1-201	ENSRNOG00000019481.5	8:130548417-130550388	1971	4.80902e-06	2.52253	0.000893227
ENSRNOT00000047593	AABR07011951.1-201	ENSRNOG00000034093.4	2:177651240-177653288	2048	4.88754e-06	3.90564	0.000903889
ENSRNOT00000083354	Kmt2d-202	ENSRNOG00000061499.1	7:140489504-140506925	1583	4.94454e-06	-2.78285	0.00091246
ENSRNOT00000082530	Sult1c3-202	ENSRNOG00000011269.6	9:4930817-4945352	1364	4.99389e-06	-3.86639	0.000914578
ENSRNOT00000090858	Zc3h11a-201	ENSRNOG00000053210.1	13:50196041-50234862	2691	5.2318e-06	4.0116	0.000947099
ENSRNOT00000006796	Erbb3-201	ENSRNOG00000004964.4	7:2989339-3010350	5934	5.2748e-06	5.17245	0.000950863
ENSRNOT00000001099	Ier3-201	ENSRNOG00000000827.6	20:3438797-3440002	1098	5.32639e-06	2.11242	0.000954137
ENSRNOT00000072735	Dpyd-202	ENSRNOG00000017105.7	2:221823686-222165727	1191	5.76182e-06	4.1698	0.00101934
ENSRNOT00000025952	Aurkaip1-202	ENSRNOG00000018691.7	5:173274773-173276169	767	6.21194e-06	-2.1009	0.00108774
ENSRNOT00000015525	Nfil3-201	ENSRNOG00000011668.6	17:12261101-12276315	1960	6.60103e-06	2.63354	0.00114417
ENSRNOT00000027295	Ilkap-201	ENSRNOG00000020115.7	9:98514583-98536581	1350	6.78647e-06	-12.1619	0.00116907
ENSRNOT00000014377	Sec13-201	ENSRNOG00000010628.4	4:145686192-145699577	1267	7.25548e-06	-2.15011	0.00123511
ENSRNOT00000010891	AABR07054614.1-201	ENSRNOG00000008245.7	3:163950776-163986059	1605	7.28225e-06	-5.79509	0.0012372
ENSRNOT00000004412	Flcn-201	ENSRNOG00000003302.5	10:46153187-46172309	2963	7.95344e-06	3.61642	0.00133497
ENSRNOT00000079310	LOC100361457-201	ENSRNOG00000053452.1	3:75643053-75644954	1901	8.27752e-06	-3.28174	0.00137893
ENSRNOT00000015579	Cnn3-201	ENSRNOG00000011559.7	2:225005018-225036188	1990	8.51533e-06	-2.04775	0.00141305
ENSRNOT00000029025	Cdc42-202	ENSRNOG00000013536.7	5:155691389-155728300	923	8.81409e-06	15.733	0.00145698
ENSRNOT00000008972	Calu-202	ENSRNOG00000006197.7	4:56625610-56653111	3166	9.18571e-06	-4.35448	0.00151257
ENSRNOT00000041237	Eif1a-201	ENSRNOG00000031421.5	18:40586314-40597671	1827	9.2646e-06	5.1246	0.00151806
ENSRNOT00000025531	Aurkaip1-201	ENSRNOG00000018691.7	5:173256636-173275340	2011	9.82952e-06	3.60071	0.00158207
ENSRNOT00000078578	Bckdk-202	ENSRNOG00000019485.6	1:199351627-199356296	1798	1.06102e-05	-2.71535	0.00168555
ENSRNOT00000006160	Mtfp1-201	ENSRNOG00000004640.6	14:84330217-84334066	1362	1.14683e-05	-2.2487	0.00177514
ENSRNOT00000031891	Fus-201	ENSRNOG00000023360.4	1:199412833-199426702	1814	1.16108e-05	-2.5834	0.00179133
ENSRNOT00000075292	Irf2bp2-201	ENSRNOG00000049900.1	19:59499875-59502161	1716	1.16752e-05	4.63559	0.00179802
ENSRNOT00000002247	Ets2-201	ENSRNOG00000001647.6	11:36075708-36092495	3614	1.24196e-05	6.98425	0.00189561
ENSRNOT00000032613	Gpi-201	ENSRNOG00000023150.5	1:90063410-90091287	2014	1.27284e-05	-2.19019	0.00193032
ENSRNOT00000000072	Atp5me-201	ENSRNOG00000000064.4	14:2325307-2326436	289	1.28394e-05	-2.36027	0.00194238
ENSRNOT00000028847	Atrn-201	ENSRNOG00000021240.4	3:123434408-123567918	8725	1.29442e-05	8.58031	0.00195134
ENSRNOT00000085092	Naca-203	ENSRNOG00000002632.8	7:2458832-2470674	887	1.30558e-05	-2.75389	0.0019647
ENSRNOT00000019302	Cyp4v3-201	ENSRNOG00000042426.2	16:50111305-50136727	3675	1.45643e-05	2.84269	0.00213908
ENSRNOT00000092993	Lmna-204	ENSRNOG00000019638.7	2:187844934-187854363	1476	1.53625e-05	-3.42396	0.00223713
ENSRNOT00000003158	Hnrnpd-201	ENSRNOG00000002292.8	14:11256267-11274578	1553	1.576e-05	-3.05276	0.00228965
ENSRNOT00000063779	Smim1-201	ENSRNOG00000043193.2	5:171309334-171312026	453	1.63692e-05	-3.50014	0.00235964
ENSRNOT00000076484	Taf9-205	ENSRNOG00000051258.2	2:30664694-30668414	1202	1.67542e-05	-3.9077	0.00240704
ENSRNOT00000044520	AABR07044383.1-201	ENSRNOG00000059770.1	20:3791839-3796275	813	1.73003e-05	5.01924	0.00246482
ENSRNOT00000073983	Ccs-201	ENSRNOG00000047816.2	1:220075246-220096404	1108	1.75672e-05	-2.32018	0.00249455
ENSRNOT00000010433	Plod1-201	ENSRNOG00000007763.7	5:164720586-164747083	2949	1.77369e-05	2.82685	0.00251446
ENSRNOT00000009611	Ttpa-201	ENSRNOG00000007139.2	5:34007919-34028452	2120	1.85393e-05	2.20717	0.00261955
ENSRNOT00000089849	Crybg2-201	ENSRNOG00000057957.1	5:152290083-152321541	5629	1.94025e-05	4.34588	0.00271463
ENSRNOT00000086293	LOC103690108-202	ENSRNOG00000047706.3	20:3791839-3794027	847	1.95381e-05	2.83038	0.00272266
ENSRNOT00000089138	RGD1311345-202	ENSRNOG00000019232.7	17:6684620-6690723	1756	2.03943e-05	-34.0589	0.00282322
ENSRNOT00000086491	Dipk2a-202	ENSRNOG00000008519.7	8:102140712-102159828	4023	2.04094e-05	3.48697	0.00282322
ENSRNOT00000017211	Tm9sf2-201	ENSRNOG00000012751.7	15:108526013-108579256	3088	2.12211e-05	3.03722	0.00292135
ENSRNOT00000004046	Nmt1-201	ENSRNOG00000002989.6	10:91126688_91160720	2204	3.91347e-05	-2.25191	0.00293329
ENSRNOT00000076951	Acat2l1-202	ENSRNOG00000013975.7	1:47996520_48026268	1975	3.92239e-05	-2.61473	0.00293752
ENSRNOT00000014585	Cmtm6-201	ENSRNOG00000010951.7	8:122789452-122807560	3254	2.15895e-05	2.24828	0.00295308
ENSRNOT00000078972	RT1-A1-202	ENSRNOG00000038999.4	20:5414447-5418015	1616	2.17416e-05	3.87006	0.00296441
ENSRNOT00000083169	Nudt3-201	ENSRNOG00000061176.1	20:7155747-7208292	2056	2.24698e-05	-3.05319	0.00304913
ENSRNOT00000080990	Emd-201	ENSRNOG00000058882.1	X:156452817_156456035	1476	4.13952e-05	-22.5011	0.00306896
ENSRNOT00000010481	Tram1-201	ENSRNOG00000007892.6	5:5215195-5297336	2754	2.36921e-05	2.57647	0.00317474
ENSRNOT00000077202	Tnfrsf9-202	ENSRNOG00000036942.4	5:168019057_168035792	1288	4.32444e-05	-3.40287	0.00317997
ENSRNOT00000022342	Ctsc-201	ENSRNOG00000016496.7	1:151918570-151949983	1874	2.43648e-05	2.03405	0.00324963
ENSRNOT00000082172	Sh3bp5-201	ENSRNOG00000052391.1	16:7473369-7538201	2551	2.47454e-05	3.63092	0.00329014
ENSRNOT00000071426	Pcbd2-201	ENSRNOG00000047796.2	17:8929809_8980571	384	4.61456e-05	-2.07321	0.00336837
ENSRNOT00000012428	Caprin1-201	ENSRNOG00000009152.7	3:93702486-93734282	3288	2.63677e-05	3.92326	0.00345224
ENSRNOT00000010610	Ankrd9-201	ENSRNOG00000008056.5	6:135410029-135412312	1452	2.6343e-05	-18.0323	0.00345224
ENSRNOT00000027999	Acadsb-201	ENSRNOG00000020624.4	1:201981356-202021008	2040	2.67599e-05	3.02155	0.00348229
ENSRNOT00000012892	Rxra-201	ENSRNOG00000009446.4	3:6211788-6295908	1985	2.67203e-05	5.43	0.00348229
ENSRNOT00000088737	Wfdc21-202	ENSRNOG00000029668.4	10:71047309_71053191	379	4.80451e-05	-12.261	0.00348707
ENSRNOT00000090853	Rnf125-201	ENSRNOG00000057832.1	18:15192961-15225427	1376	2.78005e-05	10.6808	0.00358501
ENSRNOT00000026280	Tpp1-201	ENSRNOG00000019212.4	1:170588034-170594168	2470	2.84999e-05	2.53921	0.00365867
ENSRNOT00000027882	Nosip-201	ENSRNOG00000020543.7	1:101066125_101072535	1166	5.29076e-05	-2.69392	0.00376844
ENSRNOT00000071712	Srm-201	ENSRNOG00000046379.2	3:14588869_14591974	1196	5.34219e-05	-4.44173	0.00379712
ENSRNOT00000014493	Rpl32-201	ENSRNOG00000010746.5	4:147715472_147719072	541	5.41874e-05	-2.07083	0.00384236
ENSRNOT00000028838	Itpa-201	ENSRNOG00000021233.6	3:123209607_123221269	1190	5.51907e-05	-2.0053	0.00389804
ENSRNOT00000054915	Fn3k-201	ENSRNOG00000036659.4	10:110631493_110642260	679	5.66283e-05	-32.4119	0.00398696
ENSRNOT00000022713	Paqr7-201	ENSRNOG00000022054.2	5:152708774_152720229	2233	5.76571e-05	-11.8854	0.00403713
ENSRNOT00000046054	Bmp1-201	ENSRNOG00000010890.6	15:52166400-52210746	3647	3.22628e-05	2.4872	0.00404471
ENSRNOT00000071817	LOC100911516-201	ENSRNOG00000051180.1	9:101388150-101388833	683	3.30499e-05	2.11942	0.00412526
ENSRNOT00000051590	Pkig-201	ENSRNOG00000010235.6	3:160047295_160115177	950	5.97684e-05	-2.26846	0.00415402
ENSRNOT00000025649	Rab14-201	ENSRNOG00000018901.5	3:14373274_14386118	3317	6.07329e-05	-3.04239	0.00420634
ENSRNOT00000042108	AC115277.1-201	ENSRNOG00000004662.6	7:15385867_15386419	552	6.19825e-05	-8.70476	0.00427301
ENSRNOT00000042875	Nagk-201	ENSRNOG00000013911.6	4:115473810_115481438	1488	6.37105e-05	-2.7145	0.00437526
ENSRNOT00000007321	Sec16b-201	ENSRNOG00000005229.8	13:75177964_75216933	4282	6.45111e-05	-9.67648	0.00440991
ENSRNOT00000047634	Zfand2a-201	ENSRNOG00000032917.3	12:17252092-17263477	3194	3.59772e-05	8.20461	0.0044325
ENSRNOT00000003219	Scpep1-201	ENSRNOG00000002358.5	10:76230372-76263866	2016	3.65743e-05	2.041	0.00449313
ENSRNOT00000018454	Sec61a1-201	ENSRNOG00000013743.5	4:120453580-120467932	3032	3.82076e-05	2.63429	0.00464165
ENSRNOT00000026390	LOC100911881-201	ENSRNOG00000050181.2	1:214476386_214511529	1493	6.98184e-05	-2.20498	0.00471142
ENSRNOT00000074005	Fbxo31-202	ENSRNOG00000042274.4	19:53487612_53497006	1848	7.06639e-05	-6.27675	0.00475054
ENSRNOT00000067850	C8a-201	ENSRNOG00000007697.7	5:124348460-124403195	3779	3.95089e-05	3.35174	0.00475139
ENSRNOT00000081239	Pfkfb1-203	ENSRNOG00000000165.8	X:23092158-23144324	1581	3.95733e-05	-5.18361	0.00475246
ENSRNOT00000009683	Nr0b2-201	ENSRNOG00000007229.2	5:151776003_151779319	1111	7.18605e-05	-3.39288	0.0048201
ENSRNOT00000003832	Rbm25l1-201	ENSRNOG00000002871.6	10:10457319_10460756	3437	7.197e-05	-2.82149	0.00482383
ENSRNOT00000080887	G6pd-201	ENSRNOG00000056728.1	X:156274799_156293926	2380	7.38213e-05	-5.76046	0.00491473
ENSRNOT00000039991	RGD1597339-201	ENSRNOG00000019701.6	1:225085281_225087266	644	7.57982e-05	-2.01874	0.00502388
ENSRNOT00000076072	Etnk2-202	ENSRNOG00000028368.7	13:50481164-50497466	2056	4.21877e-05	-7.34587	0.00502415
ENSRNOT00000021550	Id4-201	ENSRNOG00000016099.2	17:16692556-16695126	1626	4.22558e-05	2.88389	0.00502527
ENSRNOT00000021862	Tkt-201	ENSRNOG00000016064.6	16:6609667_6634595	2077	7.59768e-05	-2.16586	0.00503198
ENSRNOT00000092736	C5-202	ENSRNOG00000018899.8	3:14049994-14112851	4405	4.27156e-05	2.68422	0.00506588
ENSRNOT00000079036	Cyp2b1-202	ENSRNOG00000033680.5	7:99142449_99181773	1878	7.70933e-05	-43.7103	0.0050946
ENSRNOT00000072778	Il17rb-202	ENSRNOG00000015498.8	16:6064287-6072740	2638	4.32923e-05	-12.2012	0.00511302
ENSRNOT00000003106	Hnrnpdl-201	ENSRNOG00000002270.7	14:11199403-11202669	1316	4.46969e-05	4.59121	0.00526439
ENSRNOT00000079074	Rnu3a-201	ENSRNOG00000059255.1	20:45357178_45357393	215	8.15609e-05	-42.7836	0.00534634
ENSRNOT00000010380	Bloc1s1-201	ENSRNOG00000007784.7	7:3342629_3346238	548	8.17198e-05	-2.69155	0.00535282
ENSRNOT00000074209	Etnppl-201	ENSRNOG00000045743.2	2:235738415-235760352	4517	4.58159e-05	3.16029	0.00538878
ENSRNOT00000001882	Sdsl-201	ENSRNOG00000001391.6	12:41636993_41647205	1378	8.32169e-05	-4.36837	0.00543098
ENSRNOT00000072509	Cox19-201	ENSRNOG00000050052.1	12:17395623-17405103	2648	4.66945e-05	-23.5522	0.00546714
ENSRNOT00000002809	Igfbp7-201	ENSRNOG00000002050.4	14:33010299-33070190	1102	4.67375e-05	2.38336	0.00546714
ENSRNOT00000000101	Rfxapl1-201	ENSRNOG00000028382.3	2:144213402-144217600	1653	4.69831e-05	28.4833	0.00548089
ENSRNOT00000024347	Atp2a2-202	ENSRNOG00000001285.8	12:39554170-39601778	5555	4.77805e-05	3.40685	0.00555123
ENSRNOT00000042558	Cib1-201	ENSRNOG00000033498.4	1:142014957_142020525	879	8.93284e-05	-2.41948	0.00574589
ENSRNOT00000074595	Glyctk-201	ENSRNOG00000046307.1	8:114848083_114853103	1976	8.98799e-05	-2.88955	0.00577721
ENSRNOT00000028095	Pmvk-201	ENSRNOG00000020696.5	2:188784221_188793895	1092	9.01192e-05	-2.22029	0.00578843
ENSRNOT00000065211	Hdgf-202	ENSRNOG00000042261.3	2:187281999-187284281	1260	5.06316e-05	-24.941	0.00580372
ENSRNOT00000057179	LOC100910833-201	ENSRNOG00000046275.2	6:131602412_131648661	1143	9.1201e-05	-22.2537	0.00583693
ENSRNOT00000014135	Kank2-201	ENSRNOG00000010643.7	8:22791999_22821223	4792	9.11676e-05	-4.61223	0.00583693
ENSRNOT00000007367	Rbm3-201	ENSRNOG00000005387.6	X:15098903-15102340	1185	5.28801e-05	-3.46865	0.00600518
ENSRNOT00000046879	Ube2e2-201	ENSRNOG00000032690.3	15:7871496_7927939	727	9.47155e-05	-2.59266	0.00603592
ENSRNOT00000081033	Rab28-202	ENSRNOG00000017074.7	14:73889336_73963202	1467	9.62046e-05	-5.83795	0.00609036
ENSRNOT00000042875	Nagk-201	ENSRNOG00000013911.6	4:115473810-115481438	1488	5.40735e-05	-2.66151	0.00610235
ENSRNOT00000028143	Pten-201	ENSRNOG00000020723.3	1:251421595-251487832	1628	5.4908e-05	28.5156	0.00617001
ENSRNOT00000044608	Hspa8-201	ENSRNOG00000034066.5	8:44990013-44993179	1938	5.63686e-05	4.00682	0.00630931
ENSRNOT00000093215	AABR07031521.1-201	ENSRNOG00000062247.1	18:17116551-17118501	1950	5.67177e-05	3.05806	0.00633183
ENSRNOT00000022713	Paqr7-201	ENSRNOG00000022054.2	5:152708774-152720229	2233	5.66615e-05	-13.3064	0.00633183
ENSRNOT00000064809	Sec24d-201	ENSRNOG00000014872.7	2:227455721-227562319	3405	5.78552e-05	30.0309	0.00640039
ENSRNOT00000060160	Cfhr2-201	ENSRNOG00000021575.6	13:56642364-56693968	1722	5.8808e-05	4.15274	0.00648068
ENSRNOT00000085760	Abtb2-202	ENSRNOG00000008510.6	3:93495105-93647721	3075	5.93606e-05	3.18885	0.00649798
ENSRNOT00000067085	Cd59-201	ENSRNOG00000042821.3	3:94010474-94028621	1484	5.92993e-05	38.363	0.00649798
ENSRNOT00000013409	Slco1b2-201	ENSRNOG00000030538.5	4:175814117-175881768	3211	5.96074e-05	3.19562	0.00651013
ENSRNOT00000010061	Dnaja1-201	ENSRNOG00000007029.3	5:57028466-57039378	1610	6.02153e-05	2.23106	0.00655979
ENSRNOT00000003125	Tec-201	ENSRNOG00000002278.7	14:37919232-38027925	2616	6.06451e-05	3.39994	0.00658149
ENSRNOT00000013851	Rab30-201	ENSRNOG00000010224.6	1:157646172-157660008	1295	6.13452e-05	3.73854	0.00663226
ENSRNOT00000082953	Hmgn2-201	ENSRNOG00000051615.1	5:152195360-152198813	1226	6.23529e-05	-2.01435	0.00669051
ENSRNOT00000055723	Dpyd-201	ENSRNOG00000017105.7	2:222214884-222694627	2956	6.22096e-05	2.29766	0.00669051
ENSRNOT00000000535	LOC108348112-201	ENSRNOG00000000461.7	20:5262119-5269328	3624	6.24498e-05	3.14982	0.00669245
ENSRNOT00000028624	Fxyd1-201	ENSRNOG00000021079.4	1:89484198_89488223	533	0.000109982	-2.35082	0.00673499
ENSRNOT00000028514	Tmem147-201	ENSRNOG00000021006.7	1:89177991_89179825	871	0.000109943	-2.0404	0.00673499
ENSRNOT00000011392	Ppcs-201	ENSRNOG00000008572.6	5:138466292_138470096	1725	0.000111269	-2.26333	0.0067998
ENSRNOT00000092432	Bri3-203	ENSRNOG00000001009.7	12:12322246-12330929	744	6.41729e-05	-4.35075	0.00685146
ENSRNOT00000008427	Srsf6-201	ENSRNOG00000006380.6	3:159305344-159310668	3513	6.5255e-05	-2.5852	0.00694102
ENSRNOT00000060111	Cfh-202	ENSRNOG00000030715.6	13:56979168-57080622	4318	6.59926e-05	3.68221	0.00700209
ENSRNOT00000003633	Abat-201	ENSRNOG00000002636.7	10:7093404_7200499	2638	0.00011521	-2.19471	0.00700711
ENSRNOT00000023741	Ctr9-201	ENSRNOG00000017195.7	1:175839107-175869165	4264	6.66966e-05	5.22451	0.00705903
ENSRNOT00000049798	Acox3-201	ENSRNOG00000008474.7	14:80314430-80355420	2594	6.7305e-05	3.4105	0.00709737
ENSRNOT00000000718	Slc16a10-201	ENSRNOG00000000588.5	20:45143452-45260119	2481	6.79325e-05	4.15025	0.00714593
ENSRNOT00000083611	Naa10-201	ENSRNOG00000060063.1	X:156863753_156868950	938	0.000118555	-2.95117	0.0071812
ENSRNOT00000028838	Itpa-201	ENSRNOG00000021233.6	3:123209607-123221269	1190	6.92489e-05	-2.05066	0.00723994
ENSRNOT00000019978	Avpi1-201	ENSRNOG00000014828.5	1:261365589-261371508	1084	6.92121e-05	-2.44102	0.00723994
ENSRNOT00000064836	Vta1-201	ENSRNOG00000011540.8	1:8830411_8878136	1176	0.000122185	-3.02461	0.00735127
ENSRNOT00000079074	Rnu3a-201	ENSRNOG00000059255.1	20:45357178-45357393	215	7.20626e-05	-43.1577	0.00741639
ENSRNOT00000088205	Rasl10b-201	ENSRNOG00000055765.1	KL568414.1:23533_32066	2513	0.000125562	-2.49367	0.00753919
ENSRNOT00000027436	Tbc1d17-201	ENSRNOG00000020191.6	1:100836989-100845392	2336	7.38192e-05	-11.3256	0.00755178
ENSRNOT00000027075	Ethe1-201	ENSRNOG00000019982.6	1:81456983_81472097	1027	0.000126013	-2.38988	0.00755954
ENSRNOT00000005459	Marc1-201	ENSRNOG00000004101.5	13:102698545-102721218	1942	7.48128e-05	-2.07024	0.0076261
ENSRNOT00000026528	Rps5-201	ENSRNOG00000019453.7	1:65660469_65664767	765	0.000128531	-9.52669	0.00768134
ENSRNOT00000015043	Timm8a1-201	ENSRNOG00000011226.7	X:105352401-105355716	472	7.5546e-05	-2.01852	0.00768255
ENSRNOT00000024176	Aph1b-201	ENSRNOG00000027295.6	8:72608219_72629265	1281	0.000129685	-2.63946	0.00773479
ENSRNOT00000037066	Timm17b-201	ENSRNOG00000025156.6	X:15340838_15347591	519	0.000135671	-2.07751	0.00803816
ENSRNOT00000076522	Cd164-202	ENSRNOG00000000304.7	20:46250362_46261994	2734	0.000137505	-2.68503	0.008136
ENSRNOT00000042643	Wfdc21-201	ENSRNOG00000029668.4	10:71047309-71053191	380	8.3344e-05	-3.328	0.00830782
ENSRNOT00000004173	Spryd4-201	ENSRNOG00000003127.4	7:2621960-2623781	1478	8.43988e-05	-2.43327	0.00840318
ENSRNOT00000010831	Cyp11a1-201	ENSRNOG00000008074.6	8:62779874-62809893	1986	8.633e-05	13.4278	0.00856557
ENSRNOT00000016479	Slirp-201	ENSRNOG00000012314.4	6:111476767_111486039	2817	0.000150152	-2.78593	0.00877394
ENSRNOT00000005917	Wdr83-201	ENSRNOG00000004287.6	19:26188637_26194198	1179	0.000150446	-2.64117	0.008782
ENSRNOT00000002499	St6gal1-202	ENSRNOG00000001823.8	11:80927600-80981415	3872	8.96635e-05	7.2387	0.0088349
ENSRNOT00000020609	Tmem160-201	ENSRNOG00000015304.5	1:78417718_78420427	819	0.000151908	-2.03026	0.00884759
ENSRNOT00000042688	LOC100362027-201	ENSRNOG00000032825.2	10:38024476_38024937	461	0.00015272	-2.46533	0.00888909
ENSRNOT00000027616	Bag3-201	ENSRNOG00000020298.6	1:199941160-199965191	2425	9.1833e-05	5.50269	0.00897636
ENSRNOT00000079036	Cyp2b1-202	ENSRNOG00000033680.5	7:99142449-99181773	1878	9.21616e-05	-48.0685	0.00899821
ENSRNOT00000031904	Fitm2-201	ENSRNOG00000027434.5	3:159856993-159863506	4464	9.2482e-05	-2.92386	0.00901921
ENSRNOT00000044226	Septin4-201	ENSRNOG00000007367.8	10:74874129_74884196	1406	0.000157677	-5.64096	0.00912413
ENSRNOT00000093210	Rpl13a-203	ENSRNOG00000062298.1	1:101120691-101123399	832	9.38145e-05	-5.35191	0.00913875
ENSRNOT00000016263	Fdx1-201	ENSRNOG00000012123.3	8:56373722-56393233	877	9.46855e-05	2.12361	0.00919223
ENSRNOT00000016758	Snrpa1-201	ENSRNOG00000011932.8	1:126961388_126974453	1040	0.000163755	-2.5491	0.00939674
ENSRNOT00000008608	Mif-201	ENSRNOG00000006589.4	20:13732197_13732859	348	0.000164616	-2.48114	0.0094219
ENSRNOT00000090193	Ndufaf2-201	ENSRNOG00000055079.1	2:39321740-39434560	1064	9.89916e-05	-2.20785	0.00949365
ENSRNOT00000030569	Chordc1-201	ENSRNOG00000026643.5	8:17421556-17446165	3211	9.901e-05	2.35042	0.00949365
ENSRNOT00000003542	Pmm2-201	ENSRNOG00000002615.5	10:7056265-7077443	1841	9.93061e-05	-2.1362	0.00950076
ENSRNOT00000038178	Tapbpl-201	ENSRNOG00000027552.4	4:157735747-157743199	1886	9.97588e-05	3.4395	0.00950195
ENSRNOT00000004305	Mid1ip1-201	ENSRNOG00000003228.5	X:13114568-13116743	1895	0.000100425	-2.27734	0.00953078
ENSRNOT00000006225	Slc38a10-201	ENSRNOG00000004604.8	10:109284956-109333899	3759	0.000101023	8.95478	0.00955821
ENSRNOT00000024815	Dnph1-201	ENSRNOG00000018397.6	9:16845524-16848503	773	0.000101294	-3.01441	0.00957328
ENSRNOT00000074738	AABR07018078.1-201	ENSRNOG00000053891.1	15:38647778_38709984	1275	0.00016863	-2.65968	0.00960247
ENSRNOT00000024176	Aph1b-201	ENSRNOG00000027295.6	8:72608219-72629265	1281	0.000102096	-2.69112	0.00960911
ENSRNOT00000073028	Cd99-201	ENSRNOG00000050735.2	20:56192389_56197025	699	0.000170149	-2.11159	0.0096582
ENSRNOT00000016881	Sfr1-201	ENSRNOG00000012641.5	1:267505335_267509350	1354	0.000171232	-2.20843	0.00970113
ENSRNOT00000017742	Foxa2-201	ENSRNOG00000013133.3	3:142383277-142387481	2224	0.000104734	-2.66928	0.00981176
ENSRNOT00000077564	LOC103694877-201	ENSRNOG00000056076.1	AABR07024106.1:11533_12195	348	0.000177887	-2.46729	0.00999577
ENSRNOT00000003391	Insig2-201	ENSRNOG00000002478.5	13:37266311-37287458	991	0.000106848	23.4334	0.00999883
ENSRNOT00000005917	Wdr83-201	ENSRNOG00000004287.6	19:26188637-26194198	1179	0.000108261	-2.64732	0.0101055
ENSRNOT00000024975	Cnppd1-201	ENSRNOG00000018325.4	9:82338865-82345262	2213	0.00011042	2.38527	0.010277
ENSRNOT00000041306	AABR07048992.1-201	ENSRNOG00000032585.5	5:99031012_99033107	2095	0.000185418	-6.69915	0.0103088
ENSRNOT00000050289	LOC100360750-201	ENSRNOG00000030374.5	13:47380405_47382955	652	0.000191404	-2.20882	0.0105823
ENSRNOT00000024326	Mrto4-201	ENSRNOG00000017979.7	5:157815360_157820889	1355	0.000194395	-5.47021	0.0107013
ENSRNOT00000020662	Exosc9-201	ENSRNOG00000014674.7	2:123264720-123275623	1623	0.000117302	-3.83045	0.0107654
ENSRNOT00000024016	Cdc123-201	ENSRNOG00000017770.7	17:76410584-76454282	1305	0.000118442	24.7088	0.0108352
ENSRNOT00000080689	Kank1-202	ENSRNOG00000016023.7	1:243375980_243398527	1819	0.000199745	-13.5375	0.0109218
ENSRNOT00000026597	Pgpep1-201	ENSRNOG00000019639.6	16:20521955-20531396	1673	0.000121254	2.50329	0.0110257
ENSRNOT00000002982	LOC498368-201	ENSRNOG00000002191.5	14:46050749-46054022	2577	0.000121829	-2.71527	0.0110484
ENSRNOT00000013580	Scrn2-201	ENSRNOG00000010214.6	10:84966988_84971009	1493	0.000204571	-3.26202	0.0111447
ENSRNOT00000026079	LOC100911730-201	ENSRNOG00000019215.6	1:214009783_214013761	1612	0.000205118	-4.58164	0.011161
ENSRNOT00000090552	Msrb1-201	ENSRNOG00000055314.1	10:14105749-14111463	869	0.000124829	-3.88566	0.011263
ENSRNOT00000078279	Lipa-202	ENSRNOG00000019077.5	1:252816526-252849904	3213	0.000132277	2.36882	0.0118106
ENSRNOT00000056174	Usp18-201	ENSRNOG00000037198.4	4:153805992-153834430	1750	0.000135001	-4.822	0.0119957
ENSRNOT00000081178	Ssbp1-202	ENSRNOG00000012100.6	4:68634928-68645172	726	0.000136182	-2.19805	0.0120637
ENSRNOT00000077070	Dpt-203	ENSRNOG00000002947.8	13:83073549_83102401	2104	0.000228768	-10.6176	0.0121663
ENSRNOT00000087731	H1f2-201	ENSRNOG00000054978.1	17:43639748_43640387	639	0.000231129	-2.70039	0.0122699
ENSRNOT00000014348	Noct-201	ENSRNOG00000010799.5	2:140286660-140306869	2609	0.000139928	-8.0432	0.0122703
ENSRNOT00000076976	Gmps-202	ENSRNOG00000051151.2	2:154580557-154590662	667	0.000142414	-5.43429	0.0124027
ENSRNOT00000021865	Kyat1-201	ENSRNOG00000016097.7	3:8752624-8766433	1417	0.00014436	-3.13239	0.0125224
ENSRNOT00000032859	RGD1304567-201	ENSRNOG00000025034.5	5:171242896-171247346	1102	0.000145429	-2.05686	0.0125769
ENSRNOT00000012767	Zrsr1-201	ENSRNOG00000009639.5	14:107750161-107751892	1731	0.000145707	4.52489	0.0125769
ENSRNOT00000023161	Med10-201	ENSRNOG00000017150.7	1:36107231_36112993	945	0.000242939	-2.0164	0.0127905
ENSRNOT00000020015	Aldh8a1-201	ENSRNOG00000014907.5	1:16910068-16930481	2697	0.000151127	2.31468	0.0129404
ENSRNOT00000018447	Scd-201	ENSRNOG00000013552.6	1:264160128-264172729	4475	0.000151485	-3.31759	0.0129452
ENSRNOT00000046229	Pnkd-202	ENSRNOG00000014806.7	9:81566073_81634529	2877	0.000247939	-36.8268	0.0129848
ENSRNOT00000024069	Irf8-201	ENSRNOG00000017869.3	19:54314864-54336640	2853	0.000152445	3.68465	0.0130142
ENSRNOT00000010229	Ttc4-201	ENSRNOG00000042467.3	5:126264104-126282385	4081	0.000154172	-4.48794	0.0131302
ENSRNOT00000002973	Nudt9-201	ENSRNOG00000002186.4	14:7036819-7054548	1393	0.000155012	-3.42564	0.0131547
ENSRNOT00000036781	Setdb2-201	ENSRNOG00000021680.7	15:39712860-39742103	2094	0.000155407	4.90886	0.0131751
ENSRNOT00000087928	Aldoa-202	ENSRNOG00000052802.1	1:198228386_198233215	1340	0.000252785	-6.21956	0.0131999
ENSRNOT00000041915	Hacd3-201	ENSRNOG00000030232.4	8:70471571-70509874	2923	0.000156219	3.58548	0.0132199
ENSRNOT00000085201	Bgn-201	ENSRNOG00000055962.1	X:157319045-157331204	2426	0.000156526	2.9208	0.0132199
ENSRNOT00000000079	Acot7-201	ENSRNOG00000010580.8	5:169357516-169450219	1499	0.000156552	-2.22843	0.0132199
ENSRNOT00000054724	Cyp2c22-201	ENSRNOG00000021924.4	1:259257656_259287684	1709	0.000255464	-2.70178	0.0133087
ENSRNOT00000082463	Aifm2-201	ENSRNOG00000059445.1	20:31339786-31352906	3416	0.000158867	4.28576	0.0133889
ENSRNOT00000000522	RT1-Db1-201	ENSRNOG00000033215.6	20:4087617-4097090	1175	0.000159282	2.75598	0.0134107
ENSRNOT00000055674	Trim25-201	ENSRNOG00000002341.7	10:76343846-76362145	2433	0.000161089	4.37794	0.0134999
ENSRNOT00000023125	LOC306766-201	ENSRNOG00000017133.7	17:10586042-10598629	2354	0.000162557	-3.12071	0.0135399
ENSRNOT00000074586	Cebpd-201	ENSRNOG00000050869.2	11:89008007-89009146	1139	0.00016329	2.92355	0.0135594
ENSRNOT00000020767	Man2a1-201	ENSRNOG00000015439.7	9:112293387-112451677	6959	0.000163777	6.02374	0.0135755
ENSRNOT00000028781	Hjv-201	ENSRNOG00000021200.6	2:198655436_198659317	2118	0.000262769	-2.17371	0.0136336
ENSRNOT00000025649	Rab14-201	ENSRNOG00000018901.5	3:14373274-14386118	3317	0.000166883	-4.24739	0.0137664
ENSRNOT00000016733	Wdr18-201	ENSRNOG00000012379.8	7:12561323_12569143	1394	0.000267214	-2.13829	0.0138161
ENSRNOT00000066119	Dpt-201	ENSRNOG00000002947.8	13:83073543-83102396	1616	0.000169493	-5.76066	0.0139014
ENSRNOT00000017883	Rbpms-201	ENSRNOG00000013328.8	16:61954589-62089579	1060	0.000170705	2.36659	0.0139606
ENSRNOT00000074087	Optn-203	ENSRNOG00000017941.8	17:77195714-77218374	3166	0.000174722	-6.4739	0.0141976
ENSRNOT00000042264	AABR07036375.1-201	ENSRNOG00000029341.4	12:40685889_40686249	360	0.000280793	-13.3429	0.014385
ENSRNOT00000075773	Marco-201	ENSRNOG00000049303.2	16:85115200-85135859	1591	0.000177486	2.66677	0.0143915
ENSRNOT00000089441	Osbpl9-202	ENSRNOG00000033593.5	5:128694802-128730446	2110	0.00017845	-13.7225	0.0144359
ENSRNOT00000016984	Vamp5-201	ENSRNOG00000012659.5	4:100231560_100232559	306	0.000282103	-36.7928	0.0144438
ENSRNOT00000059426	LOC294154-201	ENSRNOG00000038883.4	20:7331325_7397448	3303	0.000283668	-35.1175	0.0144742
ENSRNOT00000014458	Pithd1-201	ENSRNOG00000010873.7	5:154322550_154332940	1416	0.000283561	-20.4562	0.0144742
ENSRNOT00000082530	Sult1c3-202	ENSRNOG00000011269.6	9:4930817_4945352	1364	0.000286991	-3.73068	0.0146021
ENSRNOT00000067574	Arhgef19-201	ENSRNOG00000047967.2	5:159755534_159773699	3648	0.000292341	-5.2759	0.0148236
ENSRNOT00000032152	Dlat-201	ENSRNOG00000009994.5	8:55062550-55087832	2600	0.000184307	-3.02691	0.0148601
ENSRNOT00000080794	Abhd6-202	ENSRNOG00000008167.5	15:18647843-18675431	2213	0.000186364	-5.69167	0.0149416
ENSRNOT00000065211	Hdgf-202	ENSRNOG00000042261.3	2:187281999_187284281	1260	0.000301526	-17.948	0.0152116
ENSRNOT00000012240	Sec62-201	ENSRNOG00000009057.4	2:116189861-116219750	1818	0.000191162	-2.76933	0.0152407
ENSRNOT00000089980	Ppie-202	ENSRNOG00000014762.7	5:140822140_140834959	1177	0.000302594	-3.4684	0.0152483
ENSRNOT00000084053	Lss-203	ENSRNOG00000054549.1	20:12842883_12855891	3125	0.000305646	-3.64492	0.0153847
ENSRNOT00000022603	Calm2-201	ENSRNOG00000016770.5	1:78843079_78851719	1112	0.00030593	-16.9275	0.0153904
ENSRNOT00000000710	Ddo-201	ENSRNOG00000000582.7	20:48739638-48758905	1268	0.000197025	-3.33693	0.0155978
ENSRNOT00000088381	Pxmp2-202	ENSRNOG00000037446.4	12:52452330_52462659	692	0.000316022	-2.91339	0.0157123
ENSRNOT00000011921	Ino80b-201	ENSRNOG00000008873.6	4:113954612_113957774	1142	0.000317124	-2.58976	0.0157408
ENSRNOT00000092125	Anpep-202	ENSRNOG00000014610.5	1:141561333-141604273	3851	0.000201397	3.65273	0.0158939
ENSRNOT00000051342	Akr1c2-201	ENSRNOG00000029844.5	17:69388346_69404323	1298	0.000324435	-10.3254	0.0159443
ENSRNOT00000047111	RGD1565784-201	ENSRNOG00000029415.4	10:14543199-14545000	1722	0.000207834	-6.57022	0.0162545
ENSRNOT00000018622	Rbp1-201	ENSRNOG00000013794.4	8:106449320_106470842	696	0.000335338	-2.03461	0.016381
ENSRNOT00000000483	Dxo-201	ENSRNOG00000000422.4	20:4517306-4519389	1363	0.000215426	-18.4438	0.016633
ENSRNOT00000001960	Tmem120a-201	ENSRNOG00000001441.7	12:23989595_23998254	1555	0.000342714	-2.14217	0.0167047
ENSRNOT00000065947	Abca8a-202	ENSRNOG00000004147.7	10:98319479-98390384	5647	0.000216742	4.32742	0.0167196
ENSRNOT00000076731	Wdr82-203	ENSRNOG00000048441.3	8:114866767-114867222	455	0.000217795	12.2192	0.0167706
ENSRNOT00000008728	Pdia4-201	ENSRNOG00000006228.5	4:77470635-77489535	2329	0.000217647	2.23835	0.0167706
ENSRNOT00000087764	Tmem53-202	ENSRNOG00000019186.7	5:136117857_136127626	933	0.000347073	-2.16474	0.0168712
ENSRNOT00000021862	Tkt-201	ENSRNOG00000016064.6	16:6609667-6634595	2077	0.000221808	-2.07697	0.0170302
ENSRNOT00000079707	Nucks1-202	ENSRNOG00000047287.2	13:48689961-48704771	732	0.000224141	-14.2374	0.0171398
ENSRNOT00000001467	Denr-201	ENSRNOG00000001106.7	12:38096033-38116919	582	0.000224265	-3.01663	0.0171398
ENSRNOT00000088416	Gsta3-202	ENSRNOG00000056847.1	9:27408332_27417023	1146	0.000354924	-2.16687	0.017178
ENSRNOT00000027756	Fads2-201	ENSRNOG00000020440.6	1:226114412-226152524	1359	0.000226021	-2.16037	0.0172029
ENSRNOT00000049540	LOC103690108-201	ENSRNOG00000047706.3	20:3791406-3793985	1047	0.00023008	16.0177	0.0174326
ENSRNOT00000010489	Phospho2-201	ENSRNOG00000007979.4	3:56030914-56038075	2104	0.000229935	-5.75862	0.0174326
ENSRNOT00000001402	Snrnp35-201	ENSRNOG00000001060.7	12:37531094_37538403	1107	0.000362671	-3.69009	0.0174679
ENSRNOT00000028434	Egln2-201	ENSRNOG00000020947.6	1:83969456_83977236	1987	0.00036304	-2.6584	0.0174762
ENSRNOT00000024617	Tpm1-203	ENSRNOG00000018184.8	8:72814739-72836159	1664	0.000231091	-2.31852	0.0174785
ENSRNOT00000026396	Rhbg-201	ENSRNOG00000019412.5	2:187610086-187622373	1689	0.000237335	-2.66452	0.0178108
ENSRNOT00000093172	Mtch1-203	ENSRNOG00000000527.6	20:6937960_6960481	810	0.000381438	-2.27423	0.0181564
ENSRNOT00000000477	Cfb-205	ENSRNOG00000051158.3	20:4536211-4542073	2554	0.000247311	2.88189	0.0184464
ENSRNOT00000014458	Pithd1-201	ENSRNOG00000010873.7	5:154322550-154332940	1416	0.000249777	-22.4269	0.0185655
ENSRNOT00000011303	Mettl5-201	ENSRNOG00000008469.5	3:56101579-56113857	1081	0.000250915	-2.42078	0.0186016
ENSRNOT00000006154	Cox20-201	ENSRNOG00000004553.7	13:96219852_96224023	1028	0.00040936	-2.24273	0.0192598
ENSRNOT00000013423	Akr1b7-201	ENSRNOG00000009875.2	4:61850347-61862526	1415	0.000263327	2.12664	0.0193709
ENSRNOT00000085476	Eif4e2-204	ENSRNOG00000019634.9	9:94307851_94326898	1044	0.000415439	-2.33281	0.019476
ENSRNOT00000073792	Map2k3-201	ENSRNOG00000049132.2	10:45089463_45110787	2319	0.000415481	-2.65946	0.019476
ENSRNOT00000022105	Tm4sf4-201	ENSRNOG00000016437.4	2:147496228_147547252	1656	0.000417568	-2.31755	0.0195624
ENSRNOT00000009943	Mtmr4-201	ENSRNOG00000007496.7	10:74886984-74909533	5648	0.000267385	5.14585	0.0195852
ENSRNOT00000028752	Otub1-201	ENSRNOG00000021175.5	1:222451673_222459952	1687	0.000426212	-2.54892	0.0198643
ENSRNOT00000011521	Mogs-201	ENSRNOG00000008648.4	4:113948513-113951847	2625	0.000280534	-6.11761	0.0202197
ENSRNOT00000071726	Smlr1-201	ENSRNOG00000047821.1	1:20856186_20877716	563	0.0004402	-2.03166	0.0203359
ENSRNOT00000086820	Ggcx-203	ENSRNOG00000012975.7	4:100277390_100293250	1399	0.000443859	-3.04089	0.0204838
ENSRNOT00000060843	Baiap2l1-201	ENSRNOG00000001007.7	12:12227009-12321172	2276	0.000287835	2.45574	0.020659
ENSRNOT00000055572	Ube4b-201	ENSRNOG00000014986.8	5:166156032-166259069	5627	0.000289258	5.2593	0.020742
ENSRNOT00000007424	Desi1-201	ENSRNOG00000005577.6	7:123238332-123259636	1416	0.000289741	22.2896	0.0207436
ENSRNOT00000076880	Slc33a1-202	ENSRNOG00000010023.6	2:154520086-154542919	3108	0.000292374	3.00122	0.0208675
ENSRNOT00000038333	Tmem126a-201	ENSRNOG00000022748.6	1:156283127-156291052	2483	0.000293106	-5.78052	0.0208675
ENSRNOT00000065232	AABR07057436.1-202	ENSRNOG00000004391.7	7:71125470_71139267	753	0.000454653	-2.39075	0.0208956
ENSRNOT00000079504	AABR07030184.1-201	ENSRNOG00000057333.1	10:74765384_74765600	216	0.000457363	-21.1385	0.0209877
ENSRNOT00000061070	Mapkapk2-201	ENSRNOG00000004726.7	13:47785160-47831110	2526	0.000295546	3.00137	0.0210012
ENSRNOT00000039067	Mrps33-201	ENSRNOG00000026528.3	4:67607272-67610710	587	0.000297514	-49.6474	0.021106
ENSRNOT00000071270	LOC102549542-201	ENSRNOG00000048949.1	2:234375314_234483149	2501	0.000469016	-3.52426	0.0213739
ENSRNOT00000079240	Osgin1-202	ENSRNOG00000014948.5	19:52077500-52085496	2016	0.000301919	-4.22112	0.0214008
ENSRNOT00000068093	Snrnp27-202	ENSRNOG00000017838.7	4:118478074_118487633	873	0.000480031	-2.21145	0.0217487
ENSRNOT00000000627	Srsf3-201	ENSRNOG00000000520.8	20:6288266_6298213	2884	0.000485492	-2.76631	0.0219108
ENSRNOT00000001954	Ywhag-201	ENSRNOG00000001436.5	12:23789637-23817883	1604	0.000314369	-7.58343	0.0220099
ENSRNOT00000012775	Pabpc1-201	ENSRNOG00000008639.7	7:75409580-75421874	2190	0.000315358	62.8538	0.0220612
ENSRNOT00000044944	Gsta5-201	ENSRNOG00000000201.7	8:85553733_85565179	1035	0.000503091	-2.21266	0.0224706
ENSRNOT00000026428	Stard10-201	ENSRNOG00000019491.6	1:166433108-166457505	1250	0.000325463	-2.22777	0.0226092
ENSRNOT00000070903	RT1-T24-3-201	ENSRNOG00000045924.3	20:3226359_3233694	1216	0.000511247	-3.49016	0.0226799
ENSRNOT00000037611	Myh9l1-201	ENSRNOG00000049236.2	7:118992355-119071712	6306	0.000327121	3.08456	0.0226802
ENSRNOT00000004351	Slc9a3r1-201	ENSRNOG00000003232.4	10:103713044_103730145	1492	0.000511998	-30.9033	0.0227019
ENSRNOT00000009491	Id2-201	ENSRNOG00000007237.7	6:44360076-44361908	733	0.000328431	33.0733	0.0227526
ENSRNOT00000017034	Znrd2-201	ENSRNOG00000012736.5	1:221087802-221089586	1054	0.000330223	-2.39992	0.0228582
ENSRNOT00000093024	Tomm5-202	ENSRNOG00000062108.1	5:60655708-60658535	627	0.000330677	-2.20197	0.0228712
ENSRNOT00000074644	Larp7-202	ENSRNOG00000048989.3	2:231873141_231881939	1437	0.000520628	-2.28761	0.0230275
ENSRNOT00000091609	Zscan26-202	ENSRNOG00000053518.1	17:45188247-45207065	4082	0.000343965	3.03946	0.0236755
ENSRNOT00000075494	C3-202	ENSRNOG00000046834.3	9:9721136-9747077	5063	0.000344576	2.72103	0.0236922
ENSRNOT00000031796	Cdk4-201	ENSRNOG00000025602.4	7:70349862_70352418	912	0.000543911	-2.33316	0.0237632
ENSRNOT00000083672	Akr1d1-202	ENSRNOG00000013004.7	4:65112943-65143941	3215	0.000353168	2.61536	0.0240193
ENSRNOT00000040029	Eif4g1-201	ENSRNOG00000001738.8	11:83908108-83926524	4779	0.000354281	2.89281	0.0240378
ENSRNOT00000023152	Cyp27a1-201	ENSRNOG00000017188.5	9:81968331-81998169	2276	0.000354137	2.03433	0.0240378
ENSRNOT00000028555	Rpl18-201	ENSRNOG00000021035.6	1:101701974_101703550	613	0.000555599	-8.94808	0.0241675
ENSRNOT00000087003	Trappc1-202	ENSRNOG00000037627.4	10:55924937_55926783	901	0.00055618	-2.19845	0.0241692
ENSRNOT00000049520	Gm5471-201	ENSRNOG00000033979.3	5:21043449_21043791	342	0.000558761	-9.03921	0.024246
ENSRNOT00000078005	Sugp1-201	ENSRNOG00000052111.1	16:21100923_21131795	2076	0.000573542	-2.901	0.0247312
ENSRNOT00000028222	LOC103690054-201	ENSRNOG00000020799.6	1:88686730_88688258	889	0.000577032	-2.1617	0.0248117
ENSRNOT00000015011	Tmem254-201	ENSRNOG00000011276.7	16:3817401_3821270	1184	0.000584452	-2.14213	0.0250445
ENSRNOT00000005306	Cfap36-201	ENSRNOG00000003901.6	14:113618963_113644779	1436	0.000586189	-25.6257	0.0250784
ENSRNOT00000073683	Gtf2f1-201	ENSRNOG00000047134.2	9:10033010-10042418	1721	0.000380295	-2.28788	0.0252427
ENSRNOT00000075588	Tspan4-201	ENSRNOG00000049324.2	1:214016896_214038723	3585	0.000604322	-4.22305	0.0256378
ENSRNOT00000028462	Syvn1-201	ENSRNOG00000020950.7	1:221409270-221417886	5066	0.000389226	-3.64607	0.0256565
ENSRNOT00000026385	Ramac-201	ENSRNOG00000019426.6	1:143583674_143589556	791	0.000607727	-2.14487	0.0257333
ENSRNOT00000082978	Scarna2-201	ENSRNOG00000051850.1	2:211344016_211344432	416	0.000623563	-3.92697	0.0262422
ENSRNOT00000023543	H6pd-201	ENSRNOG00000017523.5	5:166998880-167030441	4724	0.000404271	2.04842	0.0264044
ENSRNOT00000012407	Phf13-201	ENSRNOG00000009046.5	5:169161411-169167831	3180	0.000411902	14.5552	0.0267599
ENSRNOT00000080770	Dhx16-202	ENSRNOG00000030157.4	20:3368929-3372070	756	0.00041325	-4.42365	0.0268068
ENSRNOT00000011999	Phlda3-201	ENSRNOG00000009068.5	13:52588916_52592001	1423	0.000645718	-2.3648	0.0270277
ENSRNOT00000072509	Cox19-201	ENSRNOG00000050052.1	12:17395623_17405103	2648	0.000647632	-13.3432	0.0270766
ENSRNOT00000091749	Slc17a3-204	ENSRNOG00000032745.5	17:43518654_43537293	2384	0.00065767	-5.96411	0.0273937
ENSRNOT00000027411	Wdr6-201	ENSRNOG00000020185.7	8:117358786-117366096	4495	0.000429546	-3.92733	0.0276128
ENSRNOT00000051268	Mt-nd6-201	ENSRNOG00000029042.3	MT:13542-14061	519	0.000433119	-2.19527	0.0277592
ENSRNOT00000050931	Snrpg-201	ENSRNOG00000032232.3	1:91588227-91588609	382	0.000433657	-2.92786	0.0277729
ENSRNOT00000019126	Sf3b1-201	ENSRNOG00000013516.6	9:61594619-61634510	4954	0.000446084	2.44841	0.0282222
ENSRNOT00000079941	LOC103694879-201	ENSRNOG00000052360.1	KL568423.1:500_1430	546	0.000686875	-21.0796	0.0283736
ENSRNOT00000082125	Nectin2-202	ENSRNOG00000018730.7	1:80639784-80666566	1796	0.00045061	2.42048	0.0284123
ENSRNOT00000007583	Srsf5-201	ENSRNOG00000005513.7	6:104611025_104615302	1180	0.000710156	-2.5769	0.0291585
ENSRNOT00000090666	Dmgdh-202	ENSRNOG00000023588.5	2:23289373_23370477	3200	0.000713172	-5.76481	0.0292689
ENSRNOT00000073079	Tbcc-201	ENSRNOG00000048291.2	9:16405184-16406338	1154	0.000470515	-2.08731	0.0293647
ENSRNOT00000024290	Mrpl48-201	ENSRNOG00000018042.7	1:165563787-165606375	1288	0.000476006	-2.68527	0.029578
ENSRNOT00000084735	Hdac3-203	ENSRNOG00000019618.7	18:31073057-31082101	1519	0.000477054	9.633	0.0296217
ENSRNOT00000018629	Sall1-201	ENSRNOG00000013907.7	19:23389374-23405039	5201	0.000480933	2.07022	0.0297116
ENSRNOT00000011312	Lypla1-201	ENSRNOG00000008320.3	5:14559333-14588422	2355	0.000480355	2.37438	0.0297116
ENSRNOT00000002447	AC133403.1-201	ENSRNOG00000046836.1	11:70056623_70067091	1758	0.000734724	-2.31991	0.0299197
ENSRNOT00000023945	Net1-201	ENSRNOG00000017765.7	17:70010793-70020982	3227	0.000487206	3.29843	0.0300342
ENSRNOT00000012377	Nbn-201	ENSRNOG00000008580.4	5:29622280-29656864	2679	0.000492413	12.6043	0.0302463
ENSRNOT00000044465	AABR07054189.1-201	ENSRNOG00000033100.4	3:143828610_143829156	546	0.000747107	-4.22669	0.0303686
ENSRNOT00000031464	Cmss1-201	ENSRNOG00000027888.6	11:45304067-45330481	970	0.000497806	19.6993	0.030475
ENSRNOT00000030837	Parl-201	ENSRNOG00000023271.7	11:84517367_84544462	1317	0.000752488	-16.073	0.0305041
ENSRNOT00000026316	Pc-201	ENSRNOG00000019372.6	1:219759182-219859848	3971	0.000511977	3.0719	0.0311132
ENSRNOT00000090051	Atp5mc2-202	ENSRNOG00000015320.7	7:144264198_144269486	626	0.000776051	-4.92705	0.0312044
ENSRNOT00000021514	Uqcrc2-201	ENSRNOG00000036742.3	1:190555176-190585734	1824	0.00052036	-7.30408	0.031422
ENSRNOT00000091610	Gspt1-203	ENSRNOG00000046271.2	10:4312862-4446200	2773	0.00052496	3.3326	0.0315764
ENSRNOT00000035558	Pigc-201	ENSRNOG00000026497.4	13:79886948-79889304	1392	0.000525931	-12.2093	0.0315802
ENSRNOT00000024815	Dnph1-201	ENSRNOG00000018397.6	9:16845524_16848503	773	0.000800221	-2.77389	0.0319748
ENSRNOT00000078775	AABR07024908.1-201	ENSRNOG00000055634.1	16:21807190-21807526	336	0.000534471	-2.28274	0.0320033
ENSRNOT00000022810	Hfe-202	ENSRNOG00000016967.7	17:43661275_43669327	1106	0.000809363	-10.3458	0.0322248
ENSRNOT00000043005	LOC100363469-201	ENSRNOG00000031579.2	10:78992579_78993045	466	0.000819161	-4.22096	0.0325135
ENSRNOT00000092741	Klc1-203	ENSRNOG00000011572.9	6:136358056_136373721	555	0.000820808	-20.4839	0.0325355
ENSRNOT00000010224	Ptp4a3-201	ENSRNOG00000007628.6	7:114997102_115002902	1327	0.000825738	-7.48923	0.0326585
ENSRNOT00000017174	Nqo1-201	ENSRNOG00000012772.5	19:38422163_38437180	1579	0.0008334	-2.57796	0.0328475
ENSRNOT00000070805	Tomm6-201	ENSRNOG00000046316.1	9:15313522-15314435	225	0.000551828	-61.4805	0.0329274
ENSRNOT00000057641	Tpm1-206	ENSRNOG00000018184.8	8:72814739-72841496	1727	0.000555262	-6.74252	0.0330632
ENSRNOT00000070805	Tomm6-201	ENSRNOG00000046316.1	9:15313522_15314435	225	0.000842568	-54.9491	0.0331626
ENSRNOT00000093512	LOC108348190-204	ENSRNOG00000051964.2	2:235049692-235052464	769	0.000558158	2.48653	0.0331895
ENSRNOT00000010871	Timm9-201	ENSRNOG00000008222.5	6:93549483-93562314	897	0.00055967	-3.14175	0.0332563
ENSRNOT00000088391	Nedd4-201	ENSRNOG00000058898.1	8:79323407-79408833	5349	0.000568536	4.09159	0.0336102
ENSRNOT00000067462	Crot-201	ENSRNOG00000006779.6	4:22081603-22116265	2684	0.000576631	2.8739	0.0339111
ENSRNOT00000015281	Aldh1b1-201	ENSRNOG00000011497.4	5:61382350_61387358	2196	0.000879451	-2.92926	0.0342671
ENSRNOT00000081444	Ly6c-201	ENSRNOG00000061813.1	KL567988.1:20092_23908	853	0.000882747	-4.02457	0.0343806
ENSRNOT00000087257	Cyp3a23/3a1-202	ENSRNOG00000032560.2	12:11655401_11733136	2059	0.000894684	-4.02073	0.0347736
ENSRNOT00000078080	Cyp2e1-202	ENSRNOG00000012458.7	1:213511873_213535542	2014	0.000899226	-4.30914	0.0348855
ENSRNOT00000042968	Rbm45-201	ENSRNOG00000010595.5	3:63220646-63235648	1801	0.000596774	-8.54306	0.0349278
ENSRNOT00000020380	Hdhd3-201	ENSRNOG00000015195.6	5:78358202_78361647	1181	0.000901236	-2.95133	0.0349332
ENSRNOT00000027700	Pklr-201	ENSRNOG00000020420.6	2:188449209_188456759	1725	0.000906171	-3.05186	0.035094
ENSRNOT00000025626	Ccdc124-201	ENSRNOG00000018932.5	16:20317445_20323265	1607	0.000907512	-3.62333	0.0351307
ENSRNOT00000073082	Rnf187-201	ENSRNOG00000049219.1	10:45273399-45279299	1891	0.000610743	-49.6663	0.0354546
ENSRNOT00000016152	Fam111a-201	ENSRNOG00000012067.6	1:229003960-229019527	3191	0.000612039	-29.7446	0.0355057
ENSRNOT00000005863	Lpin1-201	ENSRNOG00000004377.6	6:41799748-41870046	3082	0.000613707	8.09564	0.0355784
ENSRNOT00000024942	Chchd5-201	ENSRNOG00000018491.6	3:121660109-121664496	1510	0.000614709	-4.19269	0.0356124
ENSRNOT00000080794	Abhd6-202	ENSRNOG00000008167.5	15:18647843_18675431	2213	0.000927913	-4.01084	0.0357964
ENSRNOT00000006913	Sgpp1-201	ENSRNOG00000005175.6	6:98675325-98695988	2795	0.000623365	-3.36254	0.0360894
ENSRNOT00000085439	RGD1307603-202	ENSRNOG00000018287.6	1:219309591_219311502	652	0.000940163	-2.33575	0.036222
ENSRNOT00000027537	Ech1-201	ENSRNOG00000020308.6	1:87009729-87016005	1174	0.000631248	21.1017	0.0364472
ENSRNOT00000055893	LOC108351584-201	ENSRNOG00000037087.1	7:127081425_127081704	279	0.000974629	-4.32747	0.0371336
ENSRNOT00000039281	Cabp1-203	ENSRNOG00000001173.8	12:47193963_47209784	928	0.000974365	-18.805	0.0371336
ENSRNOT00000021864	Camk2n1-201	ENSRNOG00000016322.2	5:156876705_156878486	409	0.000979918	-3.7539	0.0373192
ENSRNOT00000052231	Rpl9-201	ENSRNOG00000028449.4	1:77829710_77830399	689	0.000980544	-2.22758	0.0373235
ENSRNOT00000039102	Tfeb-201	ENSRNOG00000014666.7	9:15207821_15214596	2358	0.000985122	-10.7269	0.037374
ENSRNOT00000010760	Mettl7b-201	ENSRNOG00000007927.4	7:3383878_3386522	1264	0.000984034	-2.19824	0.037374
ENSRNOT00000001438	Kdelr2-201	ENSRNOG00000001083.7	12:13192452_13210758	1791	0.00099305	-5.95767	0.0376352
ENSRNOT00000083668	Mocs2-202	ENSRNOG00000056325.1	2:46980975_46992883	1467	0.000996544	-3.88484	0.0376793
ENSRNOT00000052098	Rangap1-201	ENSRNOG00000031789.5	7:122940375-122967178	2765	0.000683079	-2.03266	0.0387603
ENSRNOT00000030784	Alkbh3-201	ENSRNOG00000021678.5	3:82874247-82906581	1260	0.000687708	-2.27501	0.0389843
ENSRNOT00000003558	Ivns1abp-201	ENSRNOG00000002618.7	13:68707775-68722469	2893	0.000708236	-3.66263	0.039897
ENSRNOT00000006618	Ahr-201	ENSRNOG00000004342.7	6:54963989-55001464	5144	0.000720236	7.19023	0.0404135
ENSRNOT00000051342	Akr1c2-201	ENSRNOG00000029844.5	17:69388346-69404323	1298	0.000725934	-6.41796	0.0406267
ENSRNOT00000073796	Adssl1-201	ENSRNOG00000046763.3	6:137184819-137206693	1797	0.000740784	-2.09281	0.0412421
ENSRNOT00000088205	Rasl10b-201	ENSRNOG00000055765.1	KL568414.1:23533-32066	2513	0.000747515	-2.01236	0.0415358
ENSRNOT00000004559	F9-201	ENSRNOG00000003430.7	X:143097524-143141794	2784	0.000757773	2.57421	0.0418884
ENSRNOT00000045315	Col18a1-201	ENSRNOG00000001229.6	20:12225201-12332858	5007	0.000763068	2.14918	0.0419913
ENSRNOT00000070986	Ubxn6-201	ENSRNOG00000048509.2	9:10995547-11000642	1632	0.000769398	-4.06339	0.04215
ENSRNOT00000001438	Kdelr2-201	ENSRNOG00000001083.7	12:13192452-13210758	1791	0.000780883	-4.99484	0.0427245
ENSRNOT00000034915	Npepl1-201	ENSRNOG00000028384.5	3:172195843-172207685	1882	0.000799533	-6.03922	0.0433845
ENSRNOT00000056199	Shisa5-201	ENSRNOG00000020667.7	8:117793288-117795919	1454	0.00081889	4.66899	0.0440996
ENSRNOT00000024196	Gpld1-201	ENSRNOG00000017702.3	17:42085027-42127678	3187	0.000823326	2.1625	0.0442549
ENSRNOT00000039132	Dpy30-201	ENSRNOG00000027126.6	6:22302068-22316894	680	0.000833666	-2.63958	0.0446147
ENSRNOT00000075242	NEWGENE_1308196-201	ENSRNOG00000049330.2	9:44491176-44571331	807	0.000850974	-2.12828	0.0453143
ENSRNOT00000026637	Vegfa-202	ENSRNOG00000019598.8	9:17340340-17355681	3546	0.000862137	3.64748	0.0458141
ENSRNOT00000020348	Tnnc2-201	ENSRNOG00000015155.6	3:161243586-161246351	752	0.000868611	-63.9388	0.0460249
ENSRNOT00000057641	Tpm1-206	ENSRNOG00000018184.8	8:72814739-72841496	1727	0.000869154	-4.75475	0.0460249
ENSRNOT00000089306	RT1-A1-206	ENSRNOG00000038999.4	20:5351604-5418011	1542	0.00087907	7.79916	0.0464637
ENSRNOT00000010240	Inhbc-201	ENSRNOG00000007700.5	7:70646518-70661891	3884	0.000885027	3.48121	0.0466691
ENSRNOT00000088273	Edem1-201	ENSRNOG00000055365.1	4:140886544-140915779	2931	0.000893405	10.5384	0.0469294
ENSRNOT00000016462	Pdp2-201	ENSRNOG00000012343.5	19:597426-601469	2116	0.000900751	-3.29695	0.0471454
ENSRNOT00000025104	Rab6a-201	ENSRNOG00000018176.7	1:165625057-165664192	3371	0.000909254	4.48861	0.0474731
ENSRNOT00000028434	Egln2-201	ENSRNOG00000020947.6	1:83969456-83977236	1987	0.000920991	-2.07781	0.0479507
ENSRNOT00000014465	Cpa1-201	ENSRNOG00000010725.3	4:57952981-57959109	1633	0.000947129	9.76745	0.0489063
ENSRNOT00000015189	Sult1c3-201	ENSRNOG00000011269.6	9:4931027-4978892	1289	0.000969914	-2.47184	0.0498798
