# Supplementary material for: Identification of Novel Mrna Isoforms Associated with Acute Heat Stress Response Using RNA-Sequencing Data in The Sprague-Dawley Rats
Source: Preprints.org preprint supplement (doi:10.20944/preprints202211.0380.v1), 2022-11-21
Supplement: Supplementary file 4 [file Table S4_Adrenal_known transcripts.xlsx]

## Sheet: Title
Table S4. The known differentially expressed mRNA isoforms (P < 0.001, FDR < 0.05 and |FC| > 2) identified in adrenal glands under various heat stress conditions.

## Sheet: CT vs. H30
The known differentially expressed mRNA isoforms (P < 0.001, FDR < 0.05 and |FC| > 2) identified in adrenal glands in CT vs. H30.
Transcript ID	Transcript Name	Gene ID	Position	Transcript length (bp*)	P-value	FC	FDR
ENSRNOT00000007175	Cst3-201	ENSRNOG00000005195.6	3:143219685-143223615	785	4.13888e-73	-1014.87	4.25261e-68
ENSRNOT00000024678	Rps15a-201	ENSRNOG00000018320.6	1:187759900-187765744	393	4.73497e-65	3225.49	2.43254e-60
ENSRNOT00000037043	LOC100362366-201	ENSRNOG00000028690.3	3:24600602-24601063	461	1.34253e-26	-9.86301	3.44855e-22
ENSRNOT00000000673	Ppa1-201	ENSRNOG00000000557.5	20:31298268-31310674	2625	2.51603e-26	-151.542	5.17035e-22
ENSRNOT00000083750	Selenof-201	ENSRNOG00000055257.1	2:250600822-250633897	1512	2.80252e-25	-29.5462	4.11362e-21
ENSRNOT00000073160	Rps19l2-202	ENSRNOG00000048199.2	9:16802318-16807966	474	7.43723e-25	35.2556	8.49067e-21
ENSRNOT00000019556	Fam32a-201	ENSRNOG00000039528.3	16:19304528-19308842	1996	3.40124e-20	22.9708	2.49622e-16
ENSRNOT00000065211	Hdgf-202	ENSRNOG00000042261.3	2:187281999-187284281	1260	3.74984e-20	-87.5797	2.56859e-16
ENSRNOT00000016009	Cxcl14-201	ENSRNOG00000011984.5	17:9109730-9117750	1612	3.26238e-19	176.338	2.09502e-15
ENSRNOT00000074146	Crem-205	ENSRNOG00000014900.8	17:57074569-57088306	378	1.17597e-18	250.917	6.04142e-15
ENSRNOT00000086717	Crat-202	ENSRNOG00000018145.7	3:8968615-8981362	1881	1.25989e-18	-111.128	6.16432e-15
ENSRNOT00000000467	Nus1-201	ENSRNOG00000000411.6	20:33557051-33584010	3644	4.17913e-18	40.4646	1.78916e-14
ENSRNOT00000000541	Slc39a7-201	ENSRNOG00000000465.7	20:3819422-3822754	1952	4.83933e-18	143.177	1.98893e-14
ENSRNOT00000022603	Calm2-201	ENSRNOG00000016770.5	1:78843079-78851719	1112	1.44986e-15	-15.0787	5.13691e-12
ENSRNOT00000028557	Grn-201	ENSRNOG00000021031.7	10:90376932-90383205	2335	3.34109e-15	-133.142	1.10739e-11
ENSRNOT00000013159	LOC680121-201	ENSRNOG00000009920.5	11:13499163-13501263	2100	1.71335e-14	18.4654	4.75791e-11
ENSRNOT00000058190	Ndufc1-201	ENSRNOG00000038218.3	2:140462899-140464607	384	3.8716e-14	-3.81916	9.94497e-11
ENSRNOT00000067780	Junb-201	ENSRNOG00000042838.3	19:26092973-26094756	1783	6.64882e-14	11.3087	1.62655e-10
ENSRNOT00000011907	Chmp5-201	ENSRNOG00000008672.7	5:57267311-57284448	1320	1.29545e-13	13.5559	3.09547e-10
ENSRNOT00000020826	Gem-201	ENSRNOG00000015160.5	5:25349927-25353661	1626	4.21566e-13	7.77811	8.8398e-10
ENSRNOT00000071424	LOC100911516-202	ENSRNOG00000051286.2	9:101106891-101107575	684	9.53481e-13	14.5942	1.92095e-09
ENSRNOT00000022557	Dgat2-201	ENSRNOG00000016573.6	1:164113458-164143818	2294	2.75599e-12	-19.8508	5.05665e-09
ENSRNOT00000046201	Mt-atp8-201	ENSRNOG00000033299.3	MT:7757-7961	204	3.50008e-12	-7.49271	5.99378e-09
ENSRNOT00000043610	AC099453.1-201	ENSRNOG00000033024.2	5:78392714-78393143	429	3.48807e-12	-4.44927	5.99378e-09
ENSRNOT00000050204	AABR07065438.1-201	ENSRNOG00000031889.4	6:128738387-128739319	932	5.89661e-12	-5.43289	9.70492e-09
ENSRNOT00000044551	Rpl7a-201	ENSRNOG00000047737.1	3:5459159-5461583	798	5.95058e-12	3.21096	9.70492e-09
ENSRNOT00000011592	Cdk16-201	ENSRNOG00000008578.8	X:1708277-1714061	1748	1.68784e-11	-40.6599	2.6276e-08
ENSRNOT00000025052	Aars-201	ENSRNOG00000018404.7	19:43193263-43215281	3363	1.85766e-11	-23.6159	2.84883e-08
ENSRNOT00000050931	Snrpg-201	ENSRNOG00000032232.3	1:91588227-91588609	382	2.87204e-11	-32.7078	4.21566e-08
ENSRNOT00000085644	Myl6-202	ENSRNOG00000054140.1	7:2906136-2909179	622	3.42764e-11	-8.16781	4.89143e-08
ENSRNOT00000057176	Pacsin3-201	ENSRNOG00000014204.7	3:80072488-80081033	1730	6.793e-11	126.483	9.38414e-08
ENSRNOT00000006754	Rpl7a-202	ENSRNOG00000049097.1	3:4867232-4869656	798	6.84987e-11	3.12005	9.38414e-08
ENSRNOT00000021286	Epn1-201	ENSRNOG00000015753.6	1:72294152-72311856	2171	6.95527e-11	-40.747	9.40316e-08
ENSRNOT00000003010	Tmem165-201	ENSRNOG00000002199.6	14:34503037-34528262	1871	7.21193e-11	43.8193	9.62352e-08
ENSRNOT00000013145	LOC100912228-201	ENSRNOG00000009768.6	4:79557853-79565097	607	1.1036e-10	30.9304	1.39991e-07
ENSRNOT00000029768	Scx-201	ENSRNOG00000021812.4	7:117519074-117521093	1134	1.14313e-10	12.9325	1.43238e-07
ENSRNOT00000029546	Rps25-201	ENSRNOG00000027503.5	8:48727617-48729580	375	1.2178e-10	-390.077	1.50755e-07
ENSRNOT00000080990	Emd-201	ENSRNOG00000058882.1	X:156452817-156456035	1476	1.45861e-10	-23.8304	1.76316e-07
ENSRNOT00000026303	Egr1-201	ENSRNOG00000019422.4	18:27657627-27661429	3130	3.83309e-10	7.6033	4.28089e-07
ENSRNOT00000001265	Rpl21-201	ENSRNOG00000000957.5	12:9996950-9998779	483	4.15414e-10	2.90883	4.54073e-07
ENSRNOT00000015756	Rpl22l1-201	ENSRNOG00000011817.6	2:115362798-115364729	560	4.91929e-10	-2.75641	5.26508e-07
ENSRNOT00000049695	AABR07053166.1-201	ENSRNOG00000029262.4	3:94832875-94833406	531	9.52036e-10	3.17586	9.78198e-07
ENSRNOT00000043704	Rpl36-201	ENSRNOG00000033473.5	9:10441258-10441834	318	1.09762e-09	3.36023	1.09494e-06
ENSRNOT00000071528	Gatd1-201	ENSRNOG00000046382.2	1:214389254-214394411	880	1.36817e-09	-58.0087	1.3262e-06
ENSRNOT00000078582	Prps1-201	ENSRNOG00000060262.1	X:111798232-111820266	1981	1.43197e-09	72.9525	1.36234e-06
ENSRNOT00000016432	Rab7a-201	ENSRNOG00000012247.6	4:119910477-119959173	2075	1.47285e-09	5.55859	1.38837e-06
ENSRNOT00000068511	Hsd3b3-202	ENSRNOG00000042884.4	2:200585747-200762206	1119	3.03139e-09	-29.7324	2.63957e-06
ENSRNOT00000020635	Rpl13-201	ENSRNOG00000015335.6	19:55917735-55919996	636	4.38728e-09	3.59761	3.66491e-06
ENSRNOT00000001099	Ier3-201	ENSRNOG00000000827.6	20:3438797-3440002	1098	5.39524e-09	-15.6281	4.4348e-06
ENSRNOT00000078600	LOC103690068-201	ENSRNOG00000056651.1	1:88192369-88193346	547	8.44778e-09	16.9467	6.6259e-06
ENSRNOT00000027662	Mrpl28-201	ENSRNOG00000042720.3	10:15495683-15498295	774	8.43464e-09	76.586	6.6259e-06
ENSRNOT00000065195	Sucla2-201	ENSRNOG00000017481.6	15:55461694-55516952	2092	1.03808e-08	120.646	7.95972e-06
ENSRNOT00000002876	Ccng2-201	ENSRNOG00000002089.5	14:16267572-16276068	2471	1.10538e-08	57.3803	8.35114e-06
ENSRNOT00000074071	Pja1-201	ENSRNOG00000047339.3	X:69213644-69218543	2112	1.56006e-08	14.2761	1.15319e-05
ENSRNOT00000023068	Igfbp2-201	ENSRNOG00000016957.5	9:80118028-80144789	1280	1.84245e-08	2.61519	1.31464e-05
ENSRNOT00000088555	RGD1564664-201	ENSRNOG00000055564.1	3:82854776-82856171	1395	2.24825e-08	4.98594	1.57145e-05
ENSRNOT00000024128	Sfrp1-201	ENSRNOG00000017783.6	16:73372006-73410777	3892	2.33797e-08	3.51706	1.61223e-05
ENSRNOT00000013114	Mrpl10-201	ENSRNOG00000009567.8	10:84976376-84984780	1686	2.44109e-08	65.6806	1.67211e-05
ENSRNOT00000049683	Mt-co3-201	ENSRNOG00000030700.3	MT:8598-9382	784	2.71321e-08	-5.60299	1.83406e-05
ENSRNOT00000072795	AABR07073045.1-201	ENSRNOG00000060344.1	4:120413652-120414118	466	3.02206e-08	-6.78446	2.0163e-05
ENSRNOT00000046010	Rps18l1-201	ENSRNOG00000033152.3	10:104521699-104522241	542	3.12053e-08	3.93829	2.04222e-05
ENSRNOT00000085933	Dlk1-202	ENSRNOG00000019584.6	6:133576567-133583751	1541	3.53321e-08	2.47088	2.29766e-05
ENSRNOT00000014912	Ssr3-201	ENSRNOG00000011148.6	2:156011001-156014527	2555	4.3925e-08	123.401	2.76884e-05
ENSRNOT00000015250	Smap2-201	ENSRNOG00000011421.7	5:139885325-139931366	2839	6.16315e-08	64.524	3.63938e-05
ENSRNOT00000028725	Fkbp2-201	ENSRNOG00000021153.6	1:222232350-222235102	633	6.3144e-08	164.019	3.69949e-05
ENSRNOT00000000352	Cd24-201	ENSRNOG00000000321.5	20:48335539-48340846	1846	6.40469e-08	7.86036	3.7179e-05
ENSRNOT00000083464	Ewsr1-202	ENSRNOG00000009437.7	14:85322295-85350948	2364	7.45592e-08	-9.34729	4.20924e-05
ENSRNOT00000081924	Hspa1b-201	ENSRNOG00000050647.2	20:4877323-4879779	2456	7.76538e-08	48.2376	4.35998e-05
ENSRNOT00000036718	Adm-201	ENSRNOG00000027030.1	1:175445087-175447259	1387	8.03157e-08	11.95	4.48493e-05
ENSRNOT00000026734	Tm9sf1-201	ENSRNOG00000019710.6	15:34314655-34322115	2405	9.59594e-08	-25.637	5.08229e-05
ENSRNOT00000066014	Erh-201	ENSRNOG00000004883.7	6:104280407-104290579	719	1.03767e-07	22.5765	5.41209e-05
ENSRNOT00000090872	Plaat3-202	ENSRNOG00000021206.6	1:222861776-222877047	483	1.15538e-07	5.47334	5.94949e-05
ENSRNOT00000030837	Parl-201	ENSRNOG00000023271.7	11:84517367-84544462	1317	1.34197e-07	-5.23433	6.79234e-05
ENSRNOT00000004408	Btg2-201	ENSRNOG00000003300.3	13:50913179-50916982	2562	1.35594e-07	3.25704	6.82942e-05
ENSRNOT00000086608	Psmb3-201	ENSRNOG00000052730.1	10:85646632-85653729	824	1.39094e-07	2.09364	6.97151e-05
ENSRNOT00000044711	Ftl1-201	ENSRNOG00000031506.4	5:152325870-152326778	908	1.50373e-07	3.23337	7.42813e-05
ENSRNOT00000076680	LOC108349244-204	ENSRNOG00000005753.8	X:115561331-115569259	1627	1.51627e-07	13.368	7.45424e-05
ENSRNOT00000041753	AC105662.1-201	ENSRNOG00000030447.5	5:173148883-173149276	393	1.60874e-07	11.7896	7.87116e-05
ENSRNOT00000010645	Rab3b-201	ENSRNOG00000008001.7	5:128501846-128568188	1149	1.77705e-07	4.53152	8.57222e-05
ENSRNOT00000034166	Nnat-201	ENSRNOG00000024923.6	3:154043872-154046330	1179	1.96678e-07	9.06164	9.31256e-05
ENSRNOT00000025608	Nutf2-201	ENSRNOG00000018945.4	19:37830916-37852189	1927	3.08684e-07	4.62346	0.000138501
ENSRNOT00000080491	Giot1-201	ENSRNOG00000051563.1	7:13104480-13108723	1962	3.40088e-07	195.883	0.000149249
ENSRNOT00000074586	Cebpd-201	ENSRNOG00000050869.2	11:89008007-89009146	1139	3.46916e-07	3.55681	0.000149249
ENSRNOT00000057641	Tpm1-206	ENSRNOG00000018184.8	8:72814739-72841496	1727	3.44978e-07	3.76496	0.000149249
ENSRNOT00000020838	Mbtps1-201	ENSRNOG00000015173.7	19:52147126-52186260	3159	3.58419e-07	-47.0722	0.000152808
ENSRNOT00000007197	Csrnp3-201	ENSRNOG00000005359.7	3:51883558-52120290	2535	4.04497e-07	32.5505	0.000171741
ENSRNOT00000076708	Lynx1-201	ENSRNOG00000006086.7	7:115982875-115988090	3799	4.3295e-07	33.5528	0.000182315
ENSRNOT00000038764	Coa4-201	ENSRNOG00000025385.3	1:165549343-165552572	1363	4.42846e-07	70.9595	0.000184966
ENSRNOT00000008030	Nsg1-201	ENSRNOG00000005700.7	14:77380261-77401996	1603	4.62641e-07	7.11358	0.000190906
ENSRNOT00000090857	Chga-201	ENSRNOG00000052549.1	6:126434225-126445568	1882	4.94737e-07	4.22685	0.000200922
ENSRNOT00000010151	Il23r-201	ENSRNOG00000007544.5	4:98203957-98305173	1875	4.93321e-07	7.31098	0.000200922
ENSRNOT00000008972	Calu-202	ENSRNOG00000006197.7	4:56625610-56653111	3166	4.93362e-07	11.6447	0.000200922
ENSRNOT00000017740	Dnajc8-201	ENSRNOG00000013255.6	5:150725673-150743730	1392	5.00279e-07	8.72604	0.000202373
ENSRNOT00000002809	Igfbp7-201	ENSRNOG00000002050.4	14:33010299-33070190	1102	5.26556e-07	2.09838	0.000212167
ENSRNOT00000025353	Pfdn1-201	ENSRNOG00000018653.5	18:29233986-29290447	1100	5.28735e-07	2.48771	0.000212213
ENSRNOT00000045156	LOC100360841-201	ENSRNOG00000033803.5	9:69790830-69791196	366	5.99479e-07	-3.36979	0.000235336
ENSRNOT00000018252	Gadd45g-201	ENSRNOG00000013090.7	17:13391466-13393243	1090	7.53105e-07	5.56374	0.000288731
ENSRNOT00000010679	Scg5-201	ENSRNOG00000007542.6	3:105235049-105279462	1189	9.37674e-07	5.05159	0.000350342
ENSRNOT00000001579	Sik1-201	ENSRNOG00000001189.6	20:10668410-10680283	4984	1.10894e-06	4.83252	0.000402621
ENSRNOT00000090211	Nsfl1c-202	ENSRNOG00000008604.7	3:146981983-147005439	1255	1.13711e-06	26.1579	0.00040695
ENSRNOT00000085279	Ephx1-202	ENSRNOG00000003515.6	13:99271365-99300579	1755	1.3131e-06	-2.90948	0.000451232
ENSRNOT00000023999	Zfp771-201	ENSRNOG00000043225.3	1:198690793-198700969	954	1.30809e-06	46.4625	0.000451232
ENSRNOT00000028892	Chgb-201	ENSRNOG00000021269.5	3:125428259-125441594	2533	1.33805e-06	4.876	0.000456857
ENSRNOT00000086878	Dnajb4-202	ENSRNOG00000013011.7	2:257394817-257418425	2215	1.38048e-06	3.54969	0.000468123
ENSRNOT00000006306	Cd48-201	ENSRNOG00000004737.7	13:90116842-90140371	1422	1.42528e-06	29.2896	0.000481725
ENSRNOT00000019108	Acad9-201	ENSRNOG00000014178.5	2:122782059-122805768	2517	1.43705e-06	-4.63312	0.000484113
ENSRNOT00000016947	Eef1a2-201	ENSRNOG00000012477.4	3:176657106-176666282	2011	1.66512e-06	5.99915	0.000548358
ENSRNOT00000079830	Gpx3-201	ENSRNOG00000052564.1	10:40247435-40255422	1468	1.67411e-06	-9.44382	0.000549558
ENSRNOT00000022095	Clu-201	ENSRNOG00000016460.7	15:42653147-42665857	1644	1.79477e-06	2.58369	0.000579637
ENSRNOT00000035916	Gnas-201	ENSRNOG00000025889.5	3:172374956-172428483	1637	2.01015e-06	4.97828	0.000643425
ENSRNOT00000009516	Oma1-201	ENSRNOG00000007214.4	5:122847644-122900475	1839	2.06959e-06	-17.2909	0.000658346
ENSRNOT00000031555	Hspb1-201	ENSRNOG00000023546.5	12:23839398-23841049	879	2.18651e-06	2.89907	0.000691261
ENSRNOT00000044241	AABR07055776.1-201	ENSRNOG00000031216.3	7:9974624-9976367	1743	2.26986e-06	4.70046	0.000708885
ENSRNOT00000091597	Dbp-202	ENSRNOG00000021027.6	1:101687895-101692845	1249	2.34656e-06	-3.71175	0.000728413
ENSRNOT00000056518	RGD1562747-201	ENSRNOG00000037352.3	8:69484322-69487951	1038	2.74944e-06	5.01448	0.000840773
ENSRNOT00000017137	Scgb1c1-201	ENSRNOG00000012847.5	1:213595239-213596459	459	2.87546e-06	5.77158	0.000863883
ENSRNOT00000076292	Gmps-201	ENSRNOG00000051151.2	2:154555870-154576770	1476	2.95101e-06	-39.9973	0.000871568
ENSRNOT00000021193	Bcat1-201	ENSRNOG00000015514.7	4:179259309-179307095	2458	2.94228e-06	10.5186	0.000871568
ENSRNOT00000020012	Crem-201	ENSRNOG00000014900.8	17:57074524-57090888	3365	2.95194e-06	4.00987	0.000871568
ENSRNOT00000027615	Slc25a42-201	ENSRNOG00000020345.6	16:20962226-20985225	2805	3.03891e-06	37.6423	0.000889578
ENSRNOT00000075073	LOC108348055-201	ENSRNOG00000047790.2	10:47785032-47792590	771	3.14774e-06	9.59844	0.000911052
ENSRNOT00000025592	Bcas2-201	ENSRNOG00000018783.6	2:205662587-205670511	1096	3.16364e-06	-3.46915	0.000913084
ENSRNOT00000028546	Dbp-201	ENSRNOG00000021027.6	1:101687854-101692846	1702	3.32797e-06	-3.88641	0.000955146
ENSRNOT00000045083	Ndufa4l2-201	ENSRNOG00000031851.5	7:70821956-70824085	943	3.4542e-06	3.95595	0.000985868
ENSRNOT00000026633	Cd9-201	ENSRNOG00000019556.7	4:157977161-158010166	1221	3.60325e-06	2.46198	0.00102272
ENSRNOT00000082097	Cdv3-202	ENSRNOG00000010186.7	8:111839090-111850075	1131	3.63381e-06	-10.5567	0.00102573
ENSRNOT00000044788	Ppp1r15a-201	ENSRNOG00000020938.7	1:101511900-101514974	2027	3.70333e-06	3.00568	0.00103965
ENSRNOT00000014213	Acot7-202	ENSRNOG00000010580.8	5:169364305-169450214	1501	4.25372e-06	-4.99857	0.0011655
ENSRNOT00000039795	Dgat1-201	ENSRNOG00000028711.3	7:117566367-117576737	1747	4.38142e-06	4.77384	0.00118782
ENSRNOT00000014865	Ccl5-201	ENSRNOG00000010906.6	10:70739799-70744315	545	4.42575e-06	49.8078	0.00119354
ENSRNOT00000023289	Rsrp1-201	ENSRNOG00000017309.7	5:153260929-153264669	1515	4.64665e-06	2.85009	0.00124656
ENSRNOT00000000831	Tpst2-201	ENSRNOG00000000664.4	12:50343085-50383496	1744	4.64575e-06	15.6329	0.00124656
ENSRNOT00000085026	Ddit4-201	ENSRNOG00000057078.1	20:29509288-29511382	1720	4.68813e-06	14.521	0.00125442
ENSRNOT00000027682	Th-201	ENSRNOG00000020410.5	1:216073030-216080287	1766	4.89756e-06	33.8198	0.0013003
ENSRNOT00000015525	Nfil3-201	ENSRNOG00000011668.6	17:12261101-12276315	1960	5.37255e-06	4.78579	0.00139752
ENSRNOT00000005383	Dusp1-201	ENSRNOG00000003977.5	10:16970625-16973418	1936	5.60236e-06	6.12354	0.00144631
ENSRNOT00000026258	Tef-201	ENSRNOG00000019383.7	7:123043502-123058604	4163	5.66372e-06	-2.73201	0.00145691
ENSRNOT00000024840	Nt5dc2-201	ENSRNOG00000018358.4	16:7212487-7220540	1797	5.78158e-06	4.21848	0.00147406
ENSRNOT00000009894	Nfkbia-201	ENSRNOG00000007390.6	6:76267227-76270457	1565	6.25751e-06	2.12219	0.001572
ENSRNOT00000016193	Slc18a1-201	ENSRNOG00000011992.4	16:22361997-22395183	2361	6.42917e-06	4.72122	0.00159562
ENSRNOT00000026597	Pgpep1-201	ENSRNOG00000019639.6	16:20521955-20531396	1673	6.51029e-06	32.3545	0.00161185
ENSRNOT00000082300	Hspe1-201	ENSRNOG00000051624.1	9:61692153-61694599	267	7.63319e-06	-64.78	0.00184975
ENSRNOT00000005132	Slu7-201	ENSRNOG00000003822.6	10:29029589-29044583	2297	7.75112e-06	16.999	0.00187391
ENSRNOT00000004901	Tbl1x-201	ENSRNOG00000003686.7	X:44907520-44988551	5017	8.04702e-06	-15.0928	0.00193634
ENSRNOT00000037115	Golim4-201	ENSRNOG00000024213.6	2:174322871-174413038	1962	8.40934e-06	-34.9078	0.00200474
ENSRNOT00000056199	Shisa5-201	ENSRNOG00000020667.7	8:117793288-117795919	1454	9.35833e-06	4.50087	0.00217545
ENSRNOT00000021725	Rpl12-201	ENSRNOG00000016220.7	3:12009577-12011666	586	9.35658e-06	2.34784	0.00217545
ENSRNOT00000023594	Syt4-201	ENSRNOG00000017333.5	18:24172586-24182012	3893	9.76578e-06	7.85488	0.00225994
ENSRNOT00000026753	Resp18-201	ENSRNOG00000019704.3	9:82470793-82477136	719	1.03041e-05	3.8037	0.00235797
ENSRNOT00000021168	Efhd1-201	ENSRNOG00000015596.5	9:94362298-94408885	1819	1.04603e-05	52.122	0.00237783
ENSRNOT00000039149	Tmem130-201	ENSRNOG00000025235.6	12:11814070-11840100	2758	1.1493e-05	4.38197	0.00257623
ENSRNOT00000016984	Vamp5-201	ENSRNOG00000012659.5	4:100231560-100232559	306	1.15981e-05	-9.83772	0.00258498
ENSRNOT00000003449	C1galt1c1-201	ENSRNOG00000002536.6	X:124921727-124926171	1313	1.20465e-05	5.92561	0.00267623
ENSRNOT00000020206	Slc25a25-201	ENSRNOG00000014338.6	3:11442396-11452529	3135	1.21513e-05	4.63165	0.00268498
ENSRNOT00000059807	RGD1309104-201	ENSRNOG00000028236.6	13:69265648-69385074	1664	1.29703e-05	2.09435	0.00283548
ENSRNOT00000080101	Ggps1-202	ENSRNOG00000016767.6	17:53962443-53971443	5337	1.3103e-05	18.52	0.00285807
ENSRNOT00000019258	Pdcd7-201	ENSRNOG00000014340.6	8:70860670-70875471	2256	1.41535e-05	-12.526	0.003036
ENSRNOT00000050213	Ybx1-ps3-201	ENSRNOG00000032902.3	10:40380387-40381886	1499	1.53317e-05	2.15819	0.00323471
ENSRNOT00000049540	LOC103690108-201	ENSRNOG00000047706.3	20:3791406-3793985	1047	1.53124e-05	52.28	0.00323471
ENSRNOT00000000072	Atp5me-201	ENSRNOG00000000064.4	14:2325307-2326436	289	1.53991e-05	-3.71161	0.00323563
ENSRNOT00000013276	Swap70-201	ENSRNOG00000009910.6	1:174862697-174924078	3876	1.54972e-05	25.556	0.0032496
ENSRNOT00000027418	Srp19-201	ENSRNOG00000020204.7	18:27114821-27121059	757	1.5653e-05	4.17277	0.00326894
ENSRNOT00000071913	Atp5f1e-201	ENSRNOG00000049912.2	3:172563104-172566010	375	1.65468e-05	-280.692	0.00339351
ENSRNOT00000044582	Mt-nd4l-201	ENSRNOG00000031053.3	MT:9869-10166	297	1.82995e-05	-5.06132	0.00366988
ENSRNOT00000083876	Cebpb-201	ENSRNOG00000057347.1	3:164424514-164425910	1396	1.85599e-05	2.51132	0.00369572
ENSRNOT00000031464	Cmss1-201	ENSRNOG00000027888.6	11:45304067-45330481	970	1.93788e-05	4.99606	0.00381443
ENSRNOT00000083474	Pink1-202	ENSRNOG00000015385.7	5:156677591-156689415	2020	2.04999e-05	2.92621	0.00399682
ENSRNOT00000019501	Ccn1-201	ENSRNOG00000014350.4	2:251529353-251532312	1984	2.07173e-05	6.22964	0.00401635
ENSRNOT00000011665	Cbx1-201	ENSRNOG00000008689.8	10:84669913-84675741	558	2.12752e-05	-29.4132	0.00410252
ENSRNOT00000057880	LOC102553715-201	ENSRNOG00000045683.2	10:49000972-49003931	1504	2.2401e-05	4.75393	0.00426232
ENSRNOT00000003248	Uchl1-201	ENSRNOG00000002343.7	14:43133217-43143973	1064	2.2709e-05	4.56473	0.00431294
ENSRNOT00000024695	Bok-202	ENSRNOG00000018214.6	9:100829551-100840504	1400	2.34172e-05	2.18164	0.00443107
ENSRNOT00000087788	Tlx2-201	ENSRNOG00000055188.1	4:113900555-113902399	1382	2.48527e-05	6.38069	0.00465131
ENSRNOT00000071817	LOC100911516-201	ENSRNOG00000051180.1	9:101388150-101388833	683	2.51743e-05	2.60901	0.00468646
ENSRNOT00000026803	Ncoa4-201	ENSRNOG00000019768.7	16:8309238-8323293	3369	2.51774e-05	2.43303	0.00468646
ENSRNOT00000010263	Nap1l5-201	ENSRNOG00000007808.3	4:89149316-89151184	1609	2.67738e-05	4.34178	0.00493887
ENSRNOT00000024765	Caly-201	ENSRNOG00000018337.6	1:212537847-212549477	1412	2.72426e-05	5.98289	0.00498952
ENSRNOT00000023452	Tubb3-201	ENSRNOG00000017209.6	19:56220754-56229813	1767	3.13115e-05	2.67407	0.00556609
ENSRNOT00000022255	Klf4-201	ENSRNOG00000016299.3	5:72283312-72287669	2366	3.14129e-05	5.63904	0.0055667
ENSRNOT00000014216	Lgals3-201	ENSRNOG00000010645.5	15:24153601-24165537	948	3.28838e-05	-5.20549	0.0058154
ENSRNOT00000085966	Aldh1l1-202	ENSRNOG00000047023.2	4:123516787-123557501	2709	3.2995e-05	-4.02336	0.00582504
ENSRNOT00000075964	Gbe1-201	ENSRNOG00000051232.2	11:7422271-7485890	1453	3.37997e-05	-33.4078	0.00590908
ENSRNOT00000001360	Tsc22d1-201	ENSRNOG00000001030.8	15:58654912-58658153	1672	3.54506e-05	2.29937	0.00617369
ENSRNOT00000043171	Rpl36al-201	ENSRNOG00000031315.2	10:57251252-57251573	321	3.68635e-05	3.11956	0.00638727
ENSRNOT00000093099	Eri3-204	ENSRNOG00000019381.9	5:136406129-136533071	1328	3.82057e-05	14.8159	0.00653171
ENSRNOT00000022375	AABR07028769.1-201	ENSRNOG00000016670.7	17:85533056-85557939	2757	3.98458e-05	-25.9265	0.00674477
ENSRNOT00000040261	LOC108349682-201	ENSRNOG00000032303.2	1:219395275-219395623	348	4.0373e-05	-2.80729	0.00681157
ENSRNOT00000050609	Esam-201	ENSRNOG00000033217.4	8:39997874-40008796	1801	4.19691e-05	17.6957	0.00700038
ENSRNOT00000008931	Apmap-201	ENSRNOG00000006795.8	3:146376827-146396346	2073	4.42101e-05	10.1923	0.00725638
ENSRNOT00000012578	Fstl3-201	ENSRNOG00000009311.6	7:12804918-12810570	1897	4.45473e-05	3.67366	0.00727687
ENSRNOT00000008734	Snap25-202	ENSRNOG00000006037.8	3:129599352-129788400	1716	4.74576e-05	6.41948	0.0076549
ENSRNOT00000027616	Bag3-201	ENSRNOG00000020298.6	1:199941160-199965191	2425	5.12099e-05	6.92499	0.0081349
ENSRNOT00000091249	RGD1565355-210	ENSRNOG00000040108.6	4:14039976-14241269	2595	5.39821e-05	-19.6841	0.00844225
ENSRNOT00000082857	Selenoh-201	ENSRNOG00000054563.1	3:72070389-72071895	654	5.43641e-05	-13.9353	0.00847619
ENSRNOT00000026558	Ackr3-201	ENSRNOG00000019622.3	9:97355923-97367445	1936	6.2321e-05	13.0549	0.00950054
ENSRNOT00000042736	LOC102555453-201	ENSRNOG00000028993.1	X:1345683-1346181	498	6.32758e-05	7.65126	0.00958918
ENSRNOT00000040993	Mt-nd2-201	ENSRNOG00000031033.4	MT:3903-4942	1039	6.58182e-05	2.32324	0.00989206
ENSRNOT00000064428	Entpd4-201	ENSRNOG00000016321.7	15:51222953-51250787	2391	6.61565e-05	10.4493	0.00989439
ENSRNOT00000088123	Hiatl3-202	ENSRNOG00000050407.2	1:69789109-69820976	2567	6.67589e-05	4.96676	0.00996998
ENSRNOT00000061139	Pnisr-201	ENSRNOG00000008782.6	5:35991067-36017944	4104	6.85401e-05	-2.31199	0.0101621
ENSRNOT00000088270	LOC100909595-203	ENSRNOG00000008376.6	4:155549985-155631856	3813	6.92144e-05	3.62001	0.0102473
ENSRNOT00000025590	Ghdc-201	ENSRNOG00000018906.7	10:88672842-88677055	2151	7.07511e-05	25.3904	0.0104148
ENSRNOT00000067875	Spp1-201	ENSRNOG00000043451.4	14:6673685-6679901	1467	7.42949e-05	7.43881	0.0107972
ENSRNOT00000080455	Ehbp1l1-202	ENSRNOG00000056038.1	1:221062146-221084129	2325	7.76796e-05	9.20452	0.0111472
ENSRNOT00000048923	Eci3-202	ENSRNOG00000029549.4	17:30617381-30639040	1157	7.95396e-05	4.82116	0.0113193
ENSRNOT00000082136	RT1-Bb-203	ENSRNOG00000032708.5	20:4039412-4047093	657	8.04412e-05	-28.7786	0.0113845
ENSRNOT00000084154	Cops2-202	ENSRNOG00000008744.6	3:118109405-118137191	3432	8.41614e-05	2.47116	0.0117613
ENSRNOT00000042126	Bex2-201	ENSRNOG00000032729.3	X:106556837-106558366	775	8.44769e-05	4.64998	0.0117613
ENSRNOT00000012725	Tf-201	ENSRNOG00000030625.6	8:111673546-111721333	2978	8.42695e-05	-19.859	0.0117613
ENSRNOT00000002500	Med21-201	ENSRNOG00000001820.7	4:180961141-180968123	794	8.44389e-05	6.60659	0.0117613
ENSRNOT00000016423	NEWGENE_621351-201	ENSRNOG00000011292.6	4:31534224-31569151	4464	8.48995e-05	2.86841	0.0117882
ENSRNOT00000050236	Eloc-201	ENSRNOG00000031730.5	5:2042990-2059351	2027	9.08002e-05	3.55296	0.0124228
ENSRNOT00000017972	Casp9-201	ENSRNOG00000012944.7	5:160355832-160373778	2358	9.14983e-05	-5.05677	0.0125017
ENSRNOT00000074024	LOC102548682-201	ENSRNOG00000049198.2	17:43791656-43792067	411	0.000104226	23.5474	0.0138718
ENSRNOT00000033918	Rarres2-201	ENSRNOG00000024705.5	4:78205811-78208767	678	0.000111587	25.3742	0.0146803
ENSRNOT00000021865	Kyat1-201	ENSRNOG00000016097.7	3:8752624-8766433	1417	0.000124144	-5.18242	0.0159914
ENSRNOT00000092133	Scn1b-203	ENSRNOG00000021102.5	1:89550737-89559960	1281	0.000124873	-3.16622	0.0159981
ENSRNOT00000073617	Hnrnph3-202	ENSRNOG00000048193.2	20:27212723-27216743	1041	0.000125265	25.0502	0.0160283
ENSRNOT00000021550	Id4-201	ENSRNOG00000016099.2	17:16692556-16695126	1626	0.000125509	5.02166	0.0160395
ENSRNOT00000073617	Hnrnph3-202	ENSRNOG00000048193.2	20:27173212-27177232	1041	0.000125828	25.6348	0.0160603
ENSRNOT00000041808	Vgf-201	ENSRNOG00000001416.5	12:22677606-22680630	2638	0.000128044	8.91687	0.0162222
ENSRNOT00000020357	Sparcl1-201	ENSRNOG00000015093.6	14:6994189-7025308	2736	0.000132287	3.2519	0.0165759
ENSRNOT00000005426	Cwc25-201	ENSRNOG00000004091.6	10:85684897-85709568	3199	0.000139378	4.61255	0.017254
ENSRNOT00000024617	Tpm1-203	ENSRNOG00000018184.8	8:72814739-72836159	1664	0.000141472	2.27057	0.0174441
ENSRNOT00000012056	Sorbs3-201	ENSRNOG00000008829.4	15:51859461-51890832	2597	0.000141415	-4.79388	0.0174441
ENSRNOT00000015122	Ckb-201	ENSRNOG00000010872.5	6:136142955-136145837	1429	0.000143936	4.11653	0.0176481
ENSRNOT00000090051	Atp5mc2-202	ENSRNOG00000015320.7	7:144264198-144269486	626	0.00014802	-4.07726	0.0179809
ENSRNOT00000089407	Rpl3-202	ENSRNOG00000016896.8	7:121297413-121302025	1212	0.00014805	174.212	0.0179809
ENSRNOT00000022627	Rab13-201	ENSRNOG00000016733.4	2:189582990-189586338	857	0.000147662	16.4804	0.0179809
ENSRNOT00000028315	LOC100360087-201	ENSRNOG00000020843.6	1:101448345-101449829	552	0.000151514	2.06189	0.0182935
ENSRNOT00000041880	LOC100364435-202	ENSRNOG00000042499.1	4:100882221-100883038	541	0.000151824	-11.3335	0.0183047
ENSRNOT00000008730	Eif2b2-201	ENSRNOG00000006467.4	6:109043879-109051253	2416	0.000152497	-11.7628	0.0183047
ENSRNOT00000077290	RGD1562747-202	ENSRNOG00000037352.3	8:69484173-69489891	2684	0.000154789	8.26124	0.0185193
ENSRNOT00000030043	Rpl11-201	ENSRNOG00000026260.6	5:154390847-154394328	537	0.000155187	2.03403	0.0185193
ENSRNOT00000016088	Ptn-201	ENSRNOG00000011946.7	4:64239157-64330996	1310	0.000160989	2.34355	0.0190486
ENSRNOT00000070792	Tnfaip6-201	ENSRNOG00000050792.2	3:37545237-37564699	1363	0.000165285	6.36699	0.0194533
ENSRNOT00000046313	Arntl-201	ENSRNOG00000014448.8	1:178039062-178137465	2973	0.000166974	10.5845	0.0195848
ENSRNOT00000021864	Camk2n1-201	ENSRNOG00000016322.2	5:156876705-156878486	409	0.000170433	-6.51043	0.0198996
ENSRNOT00000085692	Ubc-201	ENSRNOG00000057823.1	12:36638456-36642734	2545	0.000172779	32.1414	0.020105
ENSRNOT00000011892	Penk-201	ENSRNOG00000008943.7	5:17056447-17061837	1348	0.000181953	15.977	0.0209209
ENSRNOT00000003486	Hand1-201	ENSRNOG00000002582.5	10:43250744-43253296	1057	0.000183314	8.19225	0.0209917
ENSRNOT00000044171	Msmo1-201	ENSRNOG00000032297.2	16:26859396-26875973	1849	0.000186524	-2.79723	0.0212944
ENSRNOT00000005911	Elk3-201	ENSRNOG00000004367.6	7:34086219-34121694	3818	0.000187406	10.0271	0.0213477
ENSRNOT00000090129	Zfp36-201	ENSRNOG00000058388.2	1:85380087-85382569	1812	0.000190191	2.54767	0.0215931
ENSRNOT00000019497	Aamp-201	ENSRNOG00000014399.6	9:81560841-81566096	2163	0.000196718	-31.8008	0.0222114
ENSRNOT00000007917	Thg1l-201	ENSRNOG00000005539.7	10:31043687-31052102	2327	0.000200086	9.04585	0.0225175
ENSRNOT00000074157	LOC100912538-201	ENSRNOG00000050877.2	2:9683569-9696050	1005	0.000202947	-23.3392	0.0227646
ENSRNOT00000051354	Ckmt1-201	ENSRNOG00000014573.6	3:113319455-113324457	1580	0.000208207	9.03511	0.0232278
ENSRNOT00000000525	RT1-Bb-201	ENSRNOG00000032708.5	20:4043740-4049711	1844	0.000207875	4.20581	0.0232278
ENSRNOT00000005930	Lta4h-201	ENSRNOG00000004494.5	7:34288364-34320235	2019	0.000211692	-3.84604	0.023591
ENSRNOT00000003832	Rbm25l1-201	ENSRNOG00000002871.6	10:10457319-10460756	3437	0.000221816	-2.24	0.024454
ENSRNOT00000049520	Gm5471-201	ENSRNOG00000033979.3	5:21043449-21043791	342	0.000223491	-5.71537	0.0245859
ENSRNOT00000039551	Ddx3x-201	ENSRNOG00000023383.6	X:10400365-10413984	4363	0.000230591	-12.5108	0.0253127
ENSRNOT00000044608	Hspa8-201	ENSRNOG00000034066.5	8:44990013-44993179	1938	0.000231401	6.11279	0.0253746
ENSRNOT00000047633	Rexo2-201	ENSRNOG00000018939.7	8:52802605-52814321	1183	0.000231686	63.5255	0.0253788
ENSRNOT00000073140	Eif4a3-201	ENSRNOG00000045791.2	10:108415201-108425206	1500	0.000240685	-2.39725	0.0260864
ENSRNOT00000013468	Ndn-201	ENSRNOG00000010146.6	1:122981754-122983351	1597	0.000241862	2.23722	0.0261587
ENSRNOT00000073967	Nrn1-201	ENSRNOG00000050767.1	17:27925056-27969433	1376	0.00024748	4.21832	0.0267101
ENSRNOT00000082511	LOC691995-201	ENSRNOG00000059827.1	10:57669529-57671080	1473	0.00025039	3.50323	0.0269959
ENSRNOT00000001490	Tesc-201	ENSRNOG00000001128.6	12:44141421-44174583	645	0.000252315	2.39258	0.0271749
ENSRNOT00000005251	Rgs1-201	ENSRNOG00000003895.7	13:61066152-61070599	1366	0.000259822	5.89555	0.0277733
ENSRNOT00000014491	Scg3-201	ENSRNOG00000010784.6	8:82582351-82641536	2144	0.000260306	4.18039	0.0277736
ENSRNOT00000041326	AABR07034639.1-201	ENSRNOG00000031273.3	11:82366073-82366505	432	0.00026298	3.3789	0.0279428
ENSRNOT00000025856	Ch25h-201	ENSRNOG00000019141.3	1:252807064-252808380	1316	0.000273883	4.24831	0.02884
ENSRNOT00000045401	AABR07035539.1-201	ENSRNOG00000039249.3	12:19159467-19159901	434	0.000278783	-4.56464	0.0291487
ENSRNOT00000009402	Dhcr24-201	ENSRNOG00000006787.6	5:126164673-126191206	3865	0.000278868	-2.40548	0.0291487
ENSRNOT00000016756	Cln8-201	ENSRNOG00000012565.4	16:79828323-79838212	2222	0.000283835	4.36129	0.0295267
ENSRNOT00000001299	Scarb1-201	ENSRNOG00000000981.8	12:36695051-36761443	2250	0.000283692	-4.10085	0.0295267
ENSRNOT00000022097	Plekha2-201	ENSRNOG00000038365.4	16:71738717-71787787	5263	0.000286688	27.5359	0.0296942
ENSRNOT00000018145	Mvd-201	ENSRNOG00000013376.6	19:55258904-55268951	1697	0.000295832	-2.90389	0.0305489
ENSRNOT00000007466	Fam110c-201	ENSRNOG00000005660.4	6:49968472-49974728	3111	0.000296437	2.79692	0.030556
ENSRNOT00000068174	Pitrm1-201	ENSRNOG00000016511.6	17:68477466-68509111	3178	0.000304781	6.56287	0.0312219
ENSRNOT00000067502	Lmo4-201	ENSRNOG00000009205.6	2:250218669-250241673	1594	0.000304607	3.5472	0.0312219
ENSRNOT00000014386	Eral1-201	ENSRNOG00000010673.7	10:65272848-65291064	2033	0.000315098	-2.40449	0.0320346
ENSRNOT00000067405	Micu1-201	ENSRNOG00000043436.3	20:29284944-29432254	2226	0.000315897	2.18739	0.0320672
ENSRNOT00000071133	Gng2-201	ENSRNOG00000048980.2	15:4850121-4853555	3434	0.000321115	2.50892	0.0324424
ENSRNOT00000010061	Dnaja1-201	ENSRNOG00000007029.3	5:57028466-57039378	1610	0.000322892	2.06784	0.0325579
ENSRNOT00000013443	Olfm1-201	ENSRNOG00000009862.8	3:6773812-6798737	2759	0.000324995	8.59091	0.0327378
ENSRNOT00000092949	AC134224.3-201	ENSRNOG00000062158.1	1:221158097-221158792	695	0.000327554	-4.35872	0.0329311
ENSRNOT00000067502	Lmo4-201	ENSRNOG00000009205.6	2:250218669-250235435	1594	0.000337539	3.32838	0.0336387
ENSRNOT00000010171	Nr4a1-201	ENSRNOG00000007607.4	7:142912315-142920216	2484	0.000337328	2.46782	0.0336387
ENSRNOT00000071806	Cldn5-201	ENSRNOG00000045811.2	11:86356293-86357718	1425	0.000350338	5.3582	0.0345788
ENSRNOT00000034300	Loxl1-201	ENSRNOG00000008680.7	8:63067299-63092009	2793	0.000354563	3.52189	0.0348618
ENSRNOT00000093338	Ntan1-204	ENSRNOG00000051382.2	10:3218474-3225074	203	0.000367845	-2.87683	0.0357233
ENSRNOT00000019307	Chrna3-201	ENSRNOG00000013829.6	8:59592402-59607275	3257	0.000377783	4.77657	0.036345
ENSRNOT00000006502	Dyrk3-201	ENSRNOG00000004870.5	13:47906230-47916877	2108	0.000387172	2.95443	0.0371093
ENSRNOT00000020219	Scg2-201	ENSRNOG00000015055.6	9:85237457-85243001	2409	0.000394311	4.51467	0.0376239
ENSRNOT00000020768	Ppp1r16a-201	ENSRNOG00000015450.5	7:117734001-117757249	2628	0.000401468	4.91166	0.0380887
ENSRNOT00000084870	Abracl-201	ENSRNOG00000051450.1	1:13165571-13175876	793	0.000403374	9.87436	0.0381287
ENSRNOT00000005343	Il2rg-201	ENSRNOG00000003954.8	X:71165365-71169038	1598	0.000430766	13.9699	0.0400184
ENSRNOT00000009249	Psmd6-201	ENSRNOG00000006751.5	15:12407523-12416105	1361	0.000432364	2.11419	0.0401305
ENSRNOT00000057895	AC128960.1-201	ENSRNOG00000038045.4	17:78876110-78876537	427	0.000434698	-2.18445	0.0403108
ENSRNOT00000080198	Rpph1-201	ENSRNOG00000054493.1	15:27738971-27739269	298	0.000440077	-81.6616	0.0406628
ENSRNOT00000022902	Prpf4b-201	ENSRNOG00000016705.7	17:30683639-30714410	4353	0.000458333	44.9171	0.0419866
ENSRNOT00000092916	Cttn-205	ENSRNOG00000047280.3	1:217602697-217638152	2919	0.000461425	-2.55453	0.0421172
ENSRNOT00000077137	AABR07058124.4-201	ENSRNOG00000055178.1	7:101138548-101138860	312	0.000464893	-4.80697	0.0422715
ENSRNOT00000005085	Atf3-201	ENSRNOG00000003745.3	13:109817894-109849632	1888	0.000467708	4.24694	0.0424149
ENSRNOT00000081355	Tuba1b-201	ENSRNOG00000053468.1	7:140614751-140617721	1608	0.000493176	3.31202	0.0442831
ENSRNOT00000008337	Aco1-201	ENSRNOG00000005849.7	5:56425023-56481218	3465	0.000506466	-2.36419	0.0451749
ENSRNOT00000092663	Srsf3-203	ENSRNOG00000000520.8	20:6288266-6296790	1917	0.000527387	-2.11682	0.046685
ENSRNOT00000081339	Slc12a7-203	ENSRNOG00000016372.7	1:32086756-32140136	1474	0.000526617	10.2549	0.046685
ENSRNOT00000041892	RGD1563601-201	ENSRNOG00000031706.2	17:27765007-27765754	747	0.00052675	-2.25144	0.046685
ENSRNOT00000083983	Slc44a1-202	ENSRNOG00000055089.1	5:70245842-70374401	4507	0.000539437	2.25023	0.0475352
ENSRNOT00000086310	Hsp90aa1-201	ENSRNOG00000059714.1	6:135107270-135112775	2758	0.000550012	2.43041	0.0480142
ENSRNOT00000005845	RGD1563962-201	ENSRNOG00000004424.6	13:51317459-51331705	2977	0.000558231	4.13642	0.0484845
ENSRNOT00000091205	Mxra8-202	ENSRNOG00000019244.6	5:173288446-173292929	2257	0.000559997	2.60338	0.0485557
ENSRNOT00000088689	LOC100365363-201	ENSRNOG00000059492.1	1:60884760-60894948	4405	0.000572613	-2.73582	0.0494717
ENSRNOT00000060865	Aktip-201	ENSRNOG00000011956.5	19:17290177-17300050	1704	0.000576538	2.35993	0.0496547
ENSRNOT00000043461	Pim3-201	ENSRNOG00000029698.5	7:129860326-129863441	1702	0.000581988	8.88973	0.0498733

## Sheet: CT vs. H60
The known differentially expressed mRNA isoforms (P < 0.001, FDR < 0.05 and |FC| > 2) identified in adrenal glands in CT vs. H60.
Transcript ID	Transcript Name	Gene ID	Position	Transcript length (bp*)	P-value	FC	FDR
ENSRNOT00000007175	Cst3-201	ENSRNOG00000005195.6	3:143219685-143223615	785	1.45604e-95	-1587.4	7.52502e-91
ENSRNOT00000024678	Rps15a-201	ENSRNOG00000018320.6	1:187759900-187765744	393	3.83983e-95	2575.99	1.32299e-90
ENSRNOT00000013159	LOC680121-201	ENSRNOG00000009920.5	11:13499163-13501263	2100	4.0546e-51	68.9261	1.04774e-46
ENSRNOT00000042736	LOC102555453-201	ENSRNOG00000028993.1	X:1345683-1346181	498	3.49999e-44	18.7748	6.02949e-40
ENSRNOT00000082300	Hspe1-201	ENSRNOG00000051624.1	9:61692153-61694599	267	4.72534e-44	-4107.47	6.9775e-40
ENSRNOT00000032974	Ell2-201	ENSRNOG00000027089.6	2:2456734-2524237	2306	1.91324e-42	10.3778	2.19732e-38
ENSRNOT00000016432	Rab7a-201	ENSRNOG00000012247.6	4:119910477-119959173	2075	1.71807e-42	6.83322	2.19732e-38
ENSRNOT00000037043	LOC100362366-201	ENSRNOG00000028690.3	3:24600602-24601063	461	7.86723e-42	-11.0847	8.1318e-38
ENSRNOT00000072616	Dedd2-201	ENSRNOG00000046112.2	1:82072543-82088275	2225	2.43536e-35	8.61631	2.09772e-31
ENSRNOT00000040461	Coq10b-201	ENSRNOG00000014456.6	9:61655962-61675873	1621	9.26183e-35	3.07685	7.36408e-31
ENSRNOT00000086878	Dnajb4-202	ENSRNOG00000013011.7	2:257394817-257418425	2215	3.78337e-34	12.9564	2.79329e-30
ENSRNOT00000027616	Bag3-201	ENSRNOG00000020298.6	1:199941160-199965191	2425	8.81035e-33	142.639	6.0711e-29
ENSRNOT00000073160	Rps19l2-202	ENSRNOG00000048199.2	9:16802318-16807966	474	1.23511e-32	26.9691	7.97901e-29
ENSRNOT00000044241	AABR07055776.1-201	ENSRNOG00000031216.3	7:9974624-9976367	1743	4.196e-32	7.16078	2.55124e-28
ENSRNOT00000031555	Hspb1-201	ENSRNOG00000023546.5	12:23839398-23841049	879	9.92063e-32	21.0763	5.69681e-28
ENSRNOT00000020012	Crem-201	ENSRNOG00000014900.8	17:57074524-57090888	3365	3.79981e-31	6.74134	1.95955e-27
ENSRNOT00000081924	Hspa1b-201	ENSRNOG00000050647.2	20:4877323-4879779	2456	5.91502e-31	200.772	2.77906e-27
ENSRNOT00000086310	Hsp90aa1-201	ENSRNOG00000059714.1	6:135107270-135112775	2758	1.20775e-30	13.3589	5.20151e-27
ENSRNOT00000010061	Dnaja1-201	ENSRNOG00000007029.3	5:57028466-57039378	1610	1.20492e-30	10.7499	5.20151e-27
ENSRNOT00000000673	Ppa1-201	ENSRNOG00000000557.5	20:31298268-31310674	2625	2.83316e-30	-264.956	1.12632e-26
ENSRNOT00000019556	Fam32a-201	ENSRNOG00000039528.3	16:19304528-19308842	1996	4.64138e-30	29.0153	1.77684e-26
ENSRNOT00000044788	Ppp1r15a-201	ENSRNOG00000020938.7	1:101511900-101514974	2027	3.0461e-28	4.4907	1.0857e-24
ENSRNOT00000005426	Cwc25-201	ENSRNOG00000004091.6	10:85684897-85709568	3199	1.05087e-27	13.4446	3.62071e-24
ENSRNOT00000001201	Hsph1-201	ENSRNOG00000000902.7	12:6322667-6341902	3446	1.1076e-27	23.7039	3.69306e-24
ENSRNOT00000011907	Chmp5-201	ENSRNOG00000008672.7	5:57267311-57284448	1320	3.5157e-27	13.8663	1.13561e-23
ENSRNOT00000088555	RGD1564664-201	ENSRNOG00000055564.1	3:82854776-82856171	1395	4.42111e-27	9.20066	1.34406e-23
ENSRNOT00000080491	Giot1-201	ENSRNOG00000051563.1	7:13104480-13108723	1962	4.90779e-27	19.327	1.40912e-23
ENSRNOT00000044711	Ftl1-201	ENSRNOG00000031506.4	5:152325870-152326778	908	4.82621e-27	4.02674	1.40912e-23
ENSRNOT00000078600	LOC103690068-201	ENSRNOG00000056651.1	1:88192369-88193346	547	2.06675e-26	15.8694	5.34063e-23
ENSRNOT00000001099	Ier3-201	ENSRNOG00000000827.6	20:3438797-3440002	1098	2.22458e-26	-40.672	5.60829e-23
ENSRNOT00000027662	Mrpl28-201	ENSRNOG00000042720.3	10:15495683-15498295	774	1.17663e-25	107.792	2.76408e-22
ENSRNOT00000013114	Mrpl10-201	ENSRNOG00000009567.8	10:84976376-84984780	1686	1.42681e-24	63.16	3.20607e-21
ENSRNOT00000014912	Ssr3-201	ENSRNOG00000011148.6	2:156011001-156014527	2555	3.94345e-24	32.263	8.15215e-21
ENSRNOT00000084202	Sfpq-201	ENSRNOG00000058461.1	5:145079802-145088498	2453	1.31578e-23	4.85221	2.66672e-20
ENSRNOT00000065211	Hdgf-202	ENSRNOG00000042261.3	2:187281999-187284281	1260	5.12779e-22	-149.271	9.6368e-19
ENSRNOT00000044608	Hspa8-201	ENSRNOG00000034066.5	8:44990013-44993179	1938	5.22249e-22	24.9586	9.63951e-19
ENSRNOT00000012363	Nudt4-201	ENSRNOG00000009094.4	7:36643915-36660141	2926	5.48352e-22	-166.582	9.94375e-19
ENSRNOT00000001360	Tsc22d1-201	ENSRNOG00000001030.8	15:58654912-58658153	1672	6.14268e-22	3.35981	1.0947e-18
ENSRNOT00000020826	Gem-201	ENSRNOG00000015160.5	5:25349927-25353661	1626	1.43903e-21	9.75343	2.47903e-18
ENSRNOT00000026558	Ackr3-201	ENSRNOG00000019622.3	9:97355923-97367445	1936	2.06434e-21	31.8947	3.38693e-18
ENSRNOT00000028315	LOC100360087-201	ENSRNOG00000020843.6	1:101448345-101449829	552	4.8086e-21	3.17636	7.64663e-18
ENSRNOT00000029768	Scx-201	ENSRNOG00000021812.4	7:117519074-117521093	1134	1.10369e-20	18.5301	1.67765e-17
ENSRNOT00000084642	Ahsa2-201	ENSRNOG00000052142.1	14:108265206-108273938	1259	1.749e-20	8.14806	2.62003e-17
ENSRNOT00000056518	RGD1562747-201	ENSRNOG00000037352.3	8:69484322-69487951	1038	6.41688e-20	10.518	9.02637e-17
ENSRNOT00000005361	Phlda1-201	ENSRNOG00000004019.3	7:54247459-54249664	1811	6.46219e-20	7.76135	9.02637e-17
ENSRNOT00000021286	Epn1-201	ENSRNOG00000015753.6	1:72294152-72311856	2171	6.71671e-20	-131.268	9.25679e-17
ENSRNOT00000068545	Crem-204	ENSRNOG00000014900.8	17:57031765-57087910	1074	6.86303e-20	13.441	9.334e-17
ENSRNOT00000016237	Ptp4a1-201	ENSRNOG00000011771.3	9:37223728-37231291	2456	8.93231e-20	4.93226	1.19905e-16
ENSRNOT00000004797	Tuba4a-201	ENSRNOG00000003597.5	9:82415604-82419288	1448	1.12892e-19	5.34459	1.4586e-16
ENSRNOT00000043610	AC099453.1-201	ENSRNOG00000033024.2	5:78392714-78393143	429	2.02218e-19	-5.08256	2.549e-16
ENSRNOT00000071424	LOC100911516-202	ENSRNOG00000051286.2	9:101106891-101107575	684	2.23281e-19	23.0194	2.7806e-16
ENSRNOT00000007466	Fam110c-201	ENSRNOG00000005660.4	6:49968472-49974728	3111	2.61323e-19	6.58184	3.21561e-16
ENSRNOT00000022557	Dgat2-201	ENSRNOG00000016573.6	1:164113458-164143818	2294	3.87666e-19	-95.8146	4.60578e-16
ENSRNOT00000071817	LOC100911516-201	ENSRNOG00000051180.1	9:101388150-101388833	683	8.66796e-19	5.03723	1.00668e-15
ENSRNOT00000043704	Rpl36-201	ENSRNOG00000033473.5	9:10441258-10441834	318	2.83217e-18	3.06447	3.21694e-15
ENSRNOT00000001265	Rpl21-201	ENSRNOG00000000957.5	12:9996950-9998779	483	3.37126e-18	2.9354	3.78765e-15
ENSRNOT00000025763	Plat-201	ENSRNOG00000019018.6	16:74098259-74122889	2542	4.2829e-18	9.13685	4.7095e-15
ENSRNOT00000082097	Cdv3-202	ENSRNOG00000010186.7	8:111839090-111850075	1131	1.55802e-17	-13.7033	1.57884e-14
ENSRNOT00000085644	Myl6-202	ENSRNOG00000054140.1	7:2906136-2909179	622	1.73533e-17	-6.92379	1.74145e-14
ENSRNOT00000022983	Serpinh1-201	ENSRNOG00000016831.6	1:164301009-164308317	2052	5.38228e-17	2.29235	5.29836e-14
ENSRNOT00000017053	Dnaja4-201	ENSRNOG00000012106.4	8:59278261-59294003	1827	7.3371e-17	37.8217	7.08771e-14
ENSRNOT00000000467	Nus1-201	ENSRNOG00000000411.6	20:33557051-33584010	3644	7.56391e-17	30.7465	7.23915e-14
ENSRNOT00000058190	Ndufc1-201	ENSRNOG00000038218.3	2:140462899-140464607	384	7.67364e-17	-3.65077	7.25577e-14
ENSRNOT00000093215	AABR07031521.1-201	ENSRNOG00000062247.1	18:17116551-17118501	1950	9.52152e-17	7.49045	8.78726e-14
ENSRNOT00000044551	Rpl7a-201	ENSRNOG00000047737.1	3:5459159-5461583	798	1.11821e-16	2.97472	1.02284e-13
ENSRNOT00000017883	Rbpms-201	ENSRNOG00000013328.8	16:61954589-62089579	1060	1.3168e-16	2.7354	1.19393e-13
ENSRNOT00000067502	Lmo4-201	ENSRNOG00000009205.6	2:250218669-250235435	1594	3.0353e-16	7.37425	2.59288e-13
ENSRNOT00000006754	Rpl7a-202	ENSRNOG00000049097.1	3:4867232-4869656	798	4.13838e-16	2.91413	3.42205e-13
ENSRNOT00000067780	Junb-201	ENSRNOG00000042838.3	19:26092973-26094756	1783	6.70398e-16	11.3278	5.45625e-13
ENSRNOT00000039275	Hspb8-201	ENSRNOG00000022392.3	12:45905370-45920013	1773	6.85453e-16	9.21569	5.53519e-13
ENSRNOT00000028557	Grn-201	ENSRNOG00000021031.7	10:90376932-90383205	2335	7.01184e-16	-69.7059	5.61833e-13
ENSRNOT00000067502	Lmo4-201	ENSRNOG00000009205.6	2:250218669-250241673	1594	1.45805e-15	7.36814	1.10006e-12
ENSRNOT00000050204	AABR07065438.1-201	ENSRNOG00000031889.4	6:128738387-128739319	932	2.00559e-15	-6.04818	1.48074e-12
ENSRNOT00000014309	Ptpn1-201	ENSRNOG00000010574.4	3:164665531-164711848	1711	2.03865e-15	10.0721	1.49447e-12
ENSRNOT00000001588	Fam222a-201	ENSRNOG00000001198.4	12:47748164-47793534	1807	4.70632e-15	6.25501	3.35489e-12
ENSRNOT00000021168	Efhd1-201	ENSRNOG00000015596.5	9:94362298-94408885	1819	8.23224e-15	18.8397	5.7108e-12
ENSRNOT00000022255	Klf4-201	ENSRNOG00000016299.3	5:72283312-72287669	2366	9.74629e-15	7.50459	6.67156e-12
ENSRNOT00000074146	Crem-205	ENSRNOG00000014900.8	17:57074569-57088306	378	1.21266e-14	345.084	8.19241e-12
ENSRNOT00000000603	Rpl10a-201	ENSRNOG00000000505.7	20:7908303-7910867	715	1.6288e-14	2.69534	1.08618e-11
ENSRNOT00000059187	Dnaaf2-201	ENSRNOG00000028155.6	6:91481953-91490366	2486	2.29201e-14	14.7711	1.49943e-11
ENSRNOT00000017181	Maff-201	ENSRNOG00000012886.4	7:120580742-120592095	1941	2.74733e-14	6.15961	1.78599e-11
ENSRNOT00000014821	Gch1-201	ENSRNOG00000011039.7	15:23934584-23969011	1482	3.35472e-14	8.24692	2.15375e-11
ENSRNOT00000020206	Slc25a25-201	ENSRNOG00000014338.6	3:11442396-11452529	3135	4.14507e-14	8.61101	2.61248e-11
ENSRNOT00000013276	Swap70-201	ENSRNOG00000009910.6	1:174862697-174924078	3876	6.58309e-14	50.9418	4.07454e-11
ENSRNOT00000046201	Mt-atp8-201	ENSRNOG00000033299.3	MT:7757-7961	204	7.91261e-14	-7.88138	4.83947e-11
ENSRNOT00000035060	Map1lc3a-201	ENSRNOG00000025443.4	3:150801288-150802935	969	1.11217e-13	3.11471	6.72266e-11
ENSRNOT00000081355	Tuba1b-201	ENSRNOG00000053468.1	7:140614751-140617721	1608	1.12487e-13	7.19555	6.75988e-11
ENSRNOT00000015525	Nfil3-201	ENSRNOG00000011668.6	17:12261101-12276315	1960	1.14922e-13	7.96574	6.86631e-11
ENSRNOT00000032015	Ifi27l2b-201	ENSRNOG00000026605.5	6:127336304-127337791	451	1.78524e-13	-3.19703	1.04253e-10
ENSRNOT00000016009	Cxcl14-201	ENSRNOG00000011984.5	17:9109730-9117750	1612	1.82285e-13	214.065	1.0539e-10
ENSRNOT00000075153	Kcnk5-201	ENSRNOG00000047005.2	15:4554602-4597000	3464	1.90027e-13	19.1499	1.08518e-10
ENSRNOT00000039795	Dgat1-201	ENSRNOG00000028711.3	7:117566367-117576737	1747	2.99306e-13	9.56543	1.65886e-10
ENSRNOT00000030569	Chordc1-201	ENSRNOG00000026643.5	8:17421556-17446165	3211	3.00113e-13	5.70188	1.65886e-10
ENSRNOT00000045156	LOC100360841-201	ENSRNOG00000033803.5	9:69790830-69791196	366	4.31592e-13	-4.54127	2.34793e-10
ENSRNOT00000047634	Zfand2a-201	ENSRNOG00000032917.3	12:17252092-17263477	3194	4.47898e-13	63.6784	2.42388e-10
ENSRNOT00000022902	Prpf4b-201	ENSRNOG00000016705.7	17:30683639-30714410	4353	5.34081e-13	111.975	2.86032e-10
ENSRNOT00000005085	Atf3-201	ENSRNOG00000003745.3	13:109817894-109849632	1888	6.30634e-13	16.6151	3.34278e-10
ENSRNOT00000025592	Bcas2-201	ENSRNOG00000018783.6	2:205662587-205670511	1096	7.05713e-13	-6.42871	3.70277e-10
ENSRNOT00000088687	Lratd1-202	ENSRNOG00000004084.7	6:39359117-39363367	3238	7.6035e-13	30.4556	3.92832e-10
ENSRNOT00000020635	Rpl13-201	ENSRNOG00000015335.6	19:55917735-55919996	636	7.62462e-13	3.69201	3.92832e-10
ENSRNOT00000015250	Smap2-201	ENSRNOG00000011421.7	5:139885325-139931366	2839	8.13601e-13	76.3358	4.16318e-10
ENSRNOT00000078582	Prps1-201	ENSRNOG00000060262.1	X:111798232-111820266	1981	1.02321e-12	89.3089	5.18439e-10
ENSRNOT00000049683	Mt-co3-201	ENSRNOG00000030700.3	MT:8598-9382	784	1.26475e-12	-8.40911	6.31537e-10
ENSRNOT00000027976	Rpl13a-201	ENSRNOG00000062298.1	1:101120324-101123402	1039	1.86288e-12	2.08375	9.08269e-10
ENSRNOT00000014910	Dynll1-201	ENSRNOG00000011222.5	12:47074199-47076572	652	1.8582e-12	3.86069	9.08269e-10
ENSRNOT00000001220	Zbed5-201	ENSRNOG00000000918.7	12:30308468-30314519	2486	1.86107e-12	2.75699	9.08269e-10
ENSRNOT00000007698	Gadd45a-201	ENSRNOG00000005615.6	4:97782511-97784842	1241	2.2241e-12	9.89639	1.07929e-09
ENSRNOT00000027088	Tomm20-201	ENSRNOG00000019980.2	19:59863420-59873411	980	2.80098e-12	2.44903	1.34036e-09
ENSRNOT00000065304	Atf4-201	ENSRNOG00000017801.7	7:121480722-121482772	1401	3.07012e-12	3.14265	1.44244e-09
ENSRNOT00000013145	LOC100912228-201	ENSRNOG00000009768.6	4:79557853-79565097	607	3.25138e-12	17.176	1.51384e-09
ENSRNOT00000015756	Rpl22l1-201	ENSRNOG00000011817.6	2:115362798-115364729	560	3.87013e-12	-2.64924	1.78584e-09
ENSRNOT00000015875	Ybx1-201	ENSRNOG00000023786.6	5:138319761-138336475	1504	4.10202e-12	2.43755	1.87609e-09
ENSRNOT00000000535	LOC108348112-201	ENSRNOG00000000461.7	20:5262119-5269328	3624	4.53034e-12	5.107	2.06286e-09
ENSRNOT00000083750	Selenof-201	ENSRNOG00000055257.1	2:250600822-250633897	1512	4.78607e-12	-33.2708	2.16975e-09
ENSRNOT00000051134	LOC100361854-201	ENSRNOG00000029512.1	X:115495697-115496045	348	6.22142e-12	-7.03416	2.79593e-09
ENSRNOT00000000824	Hps4-201	ENSRNOG00000000661.5	12:50285293-50313976	2343	6.504e-12	4.95668	2.91027e-09
ENSRNOT00000085315	Errfi1-201	ENSRNOG00000058186.1	5:167952727-167966009	2980	7.33196e-12	9.73965	3.25259e-09
ENSRNOT00000000072	Atp5me-201	ENSRNOG00000000064.4	14:2325307-2326436	289	1.12723e-11	-4.49211	4.89552e-09
ENSRNOT00000020204	Crem-203	ENSRNOG00000014900.8	17:57040022-57088502	1347	1.3971e-11	7.14011	6.01703e-09
ENSRNOT00000049540	LOC103690108-201	ENSRNOG00000047706.3	20:3791406-3793985	1047	1.5431e-11	198.241	6.56376e-09
ENSRNOT00000031548	Cyp21a1-201	ENSRNOG00000000428.6	20:4486218-4489281	1963	1.54245e-11	12.9429	6.56376e-09
ENSRNOT00000082312	Wbp11l1-202	ENSRNOG00000049593.2	4:170772162-170810080	2385	2.94091e-11	-65.0927	1.22573e-08
ENSRNOT00000077290	RGD1562747-202	ENSRNOG00000037352.3	8:69484173-69489891	2684	3.66476e-11	19.631	1.50917e-08
ENSRNOT00000029546	Rps25-201	ENSRNOG00000027503.5	8:48727617-48729580	375	3.85122e-11	-365.755	1.57966e-08
ENSRNOT00000013043	Nampt-201	ENSRNOG00000009754.6	6:52122084-52156472	2562	4.9489e-11	3.94276	2.01391e-08
ENSRNOT00000092949	AC134224.3-201	ENSRNOG00000062158.1	1:221158097-221158792	695	5.50919e-11	-11.0654	2.21575e-08
ENSRNOT00000019192	Hmox1-201	ENSRNOG00000014117.7	19:14508615-14515456	1566	5.62336e-11	6.00823	2.2529e-08
ENSRNOT00000064983	Iqub-201	ENSRNOG00000021729.6	4:51482169-51586881	3033	5.98206e-11	48.6414	2.37817e-08
ENSRNOT00000085933	Dlk1-202	ENSRNOG00000019584.6	6:133576567-133583751	1541	6.41265e-11	2.21736	2.53958e-08
ENSRNOT00000026633	Cd9-201	ENSRNOG00000019556.7	4:157977161-158010166	1221	6.78575e-11	2.07665	2.67708e-08
ENSRNOT00000032918	Irs2-201	ENSRNOG00000023509.6	16:83824429-83848684	6501	7.08177e-11	4.23924	2.78324e-08
ENSRNOT00000046010	Rps18l1-201	ENSRNOG00000033152.3	10:104521699-104522241	542	7.63705e-11	3.57518	2.96762e-08
ENSRNOT00000000352	Cd24-201	ENSRNOG00000000321.5	20:48335539-48340846	1846	7.81918e-11	6.38299	3.01572e-08
ENSRNOT00000010171	Nr4a1-201	ENSRNOG00000007607.4	7:142912315-142920216	2484	8.69081e-11	3.2615	3.31479e-08
ENSRNOT00000047593	AABR07011951.1-201	ENSRNOG00000034093.4	2:177651240-177653288	2048	1.00142e-10	5.33353	3.80551e-08
ENSRNOT00000023452	Tubb3-201	ENSRNOG00000017209.6	19:56220754-56229813	1767	1.1253e-10	5.62795	4.24504e-08
ENSRNOT00000030244	Ldah-201	ENSRNOG00000021475.6	6:33407247-33491725	2726	1.27765e-10	8.12223	4.75043e-08
ENSRNOT00000028743	Stip1-201	ENSRNOG00000021164.7	1:222274132-222293148	2101	1.37965e-10	3.80859	5.11126e-08
ENSRNOT00000009046	Rpl34-202	ENSRNOG00000016387.8	2:235850333-235852708	354	1.41189e-10	2.06283	5.21206e-08
ENSRNOT00000016490	Nthl1-201	ENSRNOG00000012213.6	10:13996644-14002910	1182	1.48231e-10	-64.5487	5.45254e-08
ENSRNOT00000000541	Slc39a7-201	ENSRNOG00000000465.7	20:3819422-3822754	1952	1.48863e-10	86.9842	5.45635e-08
ENSRNOT00000048923	Eci3-202	ENSRNOG00000029549.4	17:30617381-30639040	1157	1.53786e-10	8.85615	5.61689e-08
ENSRNOT00000039186	Mettl9-201	ENSRNOG00000025940.3	1:190964884-191009926	1456	1.56398e-10	-92.0858	5.69218e-08
ENSRNOT00000023594	Syt4-201	ENSRNOG00000017333.5	18:24172586-24182012	3893	1.78051e-10	11.0382	6.41249e-08
ENSRNOT00000025856	Ch25h-201	ENSRNOG00000019141.3	1:252807064-252808380	1316	1.82218e-10	10.1464	6.53979e-08
ENSRNOT00000067085	Cd59-201	ENSRNOG00000042821.3	3:94010474-94028621	1484	1.9057e-10	2.28011	6.81587e-08
ENSRNOT00000048781	Sdc3-201	ENSRNOG00000011927.7	5:148923097-148956404	4841	2.13435e-10	-3.76291	7.55522e-08
ENSRNOT00000083677	Zfp36l1-201	ENSRNOG00000058646.1	6:103308044-103313074	2728	2.36748e-10	3.88547	8.29525e-08
ENSRNOT00000033784	Kif20a-201	ENSRNOG00000024428.4	18:27424327-27432814	2921	2.43053e-10	11.1381	8.48741e-08
ENSRNOT00000006957	Rtn4-202	ENSRNOG00000004621.8	14:114127024-114173670	1409	3.36047e-10	4.03714	1.15016e-07
ENSRNOT00000072795	AABR07073045.1-201	ENSRNOG00000060344.1	4:120413652-120414118	466	3.71183e-10	-8.25454	1.25381e-07
ENSRNOT00000079830	Gpx3-201	ENSRNOG00000052564.1	10:40247435-40255422	1468	3.90805e-10	-28.1268	1.31152e-07
ENSRNOT00000085692	Ubc-201	ENSRNOG00000057823.1	12:36638456-36642734	2545	4.08555e-10	4041.83	1.36665e-07
ENSRNOT00000023289	Rsrp1-201	ENSRNOG00000017309.7	5:153260929-153264669	1515	4.42001e-10	3.66704	1.45963e-07
ENSRNOT00000056199	Shisa5-201	ENSRNOG00000020667.7	8:117793288-117795919	1454	4.53031e-10	3.68185	1.49018e-07
ENSRNOT00000009249	Psmd6-201	ENSRNOG00000006751.5	15:12407523-12416105	1361	4.61013e-10	2.71359	1.50797e-07
ENSRNOT00000085026	Ddit4-201	ENSRNOG00000057078.1	20:29509288-29511382	1720	5.97971e-10	18.3367	1.92548e-07
ENSRNOT00000007771	Creb3l1-201	ENSRNOG00000005413.5	3:80892434-80933283	2640	6.31354e-10	26.8863	2.02667e-07
ENSRNOT00000034166	Nnat-201	ENSRNOG00000024923.6	3:154043872-154046330	1179	6.52033e-10	6.82402	2.08657e-07
ENSRNOT00000005132	Slu7-201	ENSRNOG00000003822.6	10:29029589-29044583	2297	7.02878e-10	57.9135	2.22858e-07
ENSRNOT00000074071	Pja1-201	ENSRNOG00000047339.3	X:69213644-69218543	2112	8.1049e-10	15.8526	2.55458e-07
ENSRNOT00000089327	Lmbr1-201	ENSRNOG00000059589.1	4:2116093-2201749	2504	9.92732e-10	7.56617	3.10005e-07
ENSRNOT00000073429	Rpn1-201	ENSRNOG00000046345.2	4:119997267-120018679	2217	9.9629e-10	4.72637	3.10179e-07
ENSRNOT00000002355	Fam43a-201	ENSRNOG00000001728.7	11:73676600-73678984	2384	1.09684e-09	2.36635	3.38426e-07
ENSRNOT00000013073	Akr1b8-201	ENSRNOG00000009734.4	4:61772063-61784637	993	1.11358e-09	3.53841	3.42567e-07
ENSRNOT00000019501	Ccn1-201	ENSRNOG00000014350.4	2:251529353-251532312	1984	1.15371e-09	9.60567	3.50739e-07
ENSRNOT00000009894	Nfkbia-201	ENSRNOG00000007390.6	6:76267227-76270457	1565	1.32068e-09	2.68012	3.94537e-07
ENSRNOT00000077856	Rnd1-201	ENSRNOG00000059857.1	7:140349137-140356209	1609	1.3923e-09	9.59927	4.14732e-07
ENSRNOT00000084700	Golt1b-201	ENSRNOG00000058386.1	4:176606648-176619710	2880	1.40671e-09	8.91334	4.16624e-07
ENSRNOT00000024695	Bok-202	ENSRNOG00000018214.6	9:100829551-100840504	1400	1.48597e-09	2.16565	4.38839e-07
ENSRNOT00000087718	Sec63-202	ENSRNOG00000000314.7	20:47494423-47559979	2557	1.50973e-09	7.47619	4.44588e-07
ENSRNOT00000025657	Gss-201	ENSRNOG00000018964.2	3:151076253-151106557	1882	1.83102e-09	23.7303	5.33125e-07
ENSRNOT00000075425	Ahsa1-201	ENSRNOG00000048981.1	6:111296416-111304224	1391	1.93622e-09	2.1101	5.58096e-07
ENSRNOT00000037685	Mtus1-201	ENSRNOG00000010748.8	16:54332659-54386129	4090	1.93838e-09	4.22418	5.58096e-07
ENSRNOT00000083474	Pink1-202	ENSRNOG00000015385.7	5:156677591-156689415	2020	1.99675e-09	2.67664	5.69907e-07
ENSRNOT00000041808	Vgf-201	ENSRNOG00000001416.5	12:22677606-22680630	2638	2.00697e-09	16.7787	5.69907e-07
ENSRNOT00000008030	Nsg1-201	ENSRNOG00000005700.7	14:77380261-77401996	1603	2.75785e-09	5.50232	7.62192e-07
ENSRNOT00000025925	St13-201	ENSRNOG00000019070.4	7:122585770-122635731	1662	2.77528e-09	2.08532	7.64964e-07
ENSRNOT00000066589	Hspd1-201	ENSRNOG00000014525.5	9:61680529-61690956	2227	3.13066e-09	2.07824	8.51563e-07
ENSRNOT00000013581	Arih1-201	ENSRNOG00000009887.7	8:64166359-64268555	5112	3.33708e-09	2.69426	9.02959e-07
ENSRNOT00000000553	Pfdn6-201	ENSRNOG00000000473.6	20:5455973-5457444	584	3.56621e-09	-3.09107	9.62438e-07
ENSRNOT00000001916	Serpine1-201	ENSRNOG00000001414.2	12:22641103-22651482	3063	3.61498e-09	6.02225	9.70371e-07
ENSRNOT00000027996	Pbx1-201	ENSRNOG00000004693.8	13:86391516-86451002	1314	3.87017e-09	4.05576	1.03101e-06
ENSRNOT00000064744	Npm1-202	ENSRNOG00000004616.8	10:18082931-18090932	1164	4.27753e-09	2.37609	1.13079e-06
ENSRNOT00000076149	Bud31-203	ENSRNOG00000000989.8	12:11234560-11240383	569	4.51493e-09	7.30484	1.18453e-06
ENSRNOT00000085226	AC106292.2-201	ENSRNOG00000059017.1	11:65743891-65745038	1147	5.25626e-09	6.69029	1.36166e-06
ENSRNOT00000006502	Dyrk3-201	ENSRNOG00000004870.5	13:47906230-47916877	2108	5.41887e-09	4.37525	1.40028e-06
ENSRNOT00000086717	Crat-202	ENSRNOG00000018145.7	3:8968615-8981362	1881	6.32327e-09	-10.5916	1.60983e-06
ENSRNOT00000010811	Ndrg1-201	ENSRNOG00000007393.7	7:107734322-107775712	2890	7.15589e-09	6.52997	1.80844e-06
ENSRNOT00000026654	Ptprn-201	ENSRNOG00000019587.6	9:82446632-82461903	3614	9.09902e-09	4.74268	2.27725e-06
ENSRNOT00000003438	Gpr137b-201	ENSRNOG00000002480.7	17:90696018-90701515	573	9.15948e-09	10.8305	2.28684e-06
ENSRNOT00000086232	Alas1-202	ENSRNOG00000056596.1	8:114927788-114940177	1969	9.19132e-09	2.84035	2.28926e-06
ENSRNOT00000061070	Mapkapk2-201	ENSRNOG00000004726.7	13:47785160-47831110	2526	9.99501e-09	3.32093	2.46567e-06
ENSRNOT00000057161	Arfgap2-201	ENSRNOG00000014429.5	3:80081646-80093658	2760	1.00601e-08	-2.04769	2.47582e-06
ENSRNOT00000026303	Egr1-201	ENSRNOG00000019422.4	18:27657627-27661429	3130	1.04256e-08	16.2192	2.55361e-06
ENSRNOT00000075555	Rmnd5b-201	ENSRNOG00000047396.2	10:34979922-34990943	1854	1.05123e-08	-6.64183	2.56874e-06
ENSRNOT00000049695	AABR07053166.1-201	ENSRNOG00000029262.4	3:94832875-94833406	531	1.10846e-08	3.3633	2.69586e-06
ENSRNOT00000023068	Igfbp2-201	ENSRNOG00000016957.5	9:80118028-80144789	1280	1.19344e-08	2.4337	2.8716e-06
ENSRNOT00000026871	Gadd45b-201	ENSRNOG00000019822.4	7:11646268-11648322	1300	1.30388e-08	4.5345	3.09823e-06
ENSRNOT00000057931	LOC498555-201	ENSRNOG00000038074.4	15:75067296-75067723	427	1.4472e-08	2.19922	3.41523e-06
ENSRNOT00000001445	Vps37b-201	ENSRNOG00000001086.5	12:37984789-38023368	2520	1.46527e-08	4.07452	3.44998e-06
ENSRNOT00000003010	Tmem165-201	ENSRNOG00000002199.6	14:34503037-34528262	1871	1.54379e-08	20.5191	3.62662e-06
ENSRNOT00000041753	AC105662.1-201	ENSRNOG00000030447.5	5:173148883-173149276	393	1.55846e-08	11.8925	3.65277e-06
ENSRNOT00000027869	Bles03-201	ENSRNOG00000020551.7	1:220806472-220808804	1676	1.68574e-08	-2.82988	3.8807e-06
ENSRNOT00000068511	Hsd3b3-202	ENSRNOG00000042884.4	2:200585747-200762206	1119	1.80835e-08	-21.6717	4.14448e-06
ENSRNOT00000085214	Eprs-202	ENSRNOG00000002393.7	13:103300931-103371577	4801	2.01812e-08	4.89955	4.55457e-06
ENSRNOT00000083156	Tuba1a-201	ENSRNOG00000060728.1	7:140637286-140640953	1617	2.05762e-08	11.7511	4.62351e-06
ENSRNOT00000047779	RT1-CE4-202	ENSRNOG00000039744.5	20:4673657-4935414	1558	2.09622e-08	2.44438	4.68986e-06
ENSRNOT00000024436	Anxa4-201	ENSRNOG00000018159.7	4:118538776-118595580	1956	2.1526e-08	39.714	4.79525e-06
ENSRNOT00000018252	Gadd45g-201	ENSRNOG00000013090.7	17:13391466-13393243	1090	2.21899e-08	7.26537	4.9325e-06
ENSRNOT00000034723	Stk24-201	ENSRNOG00000011511.7	15:106629311-106678918	1260	2.23186e-08	3.62333	4.95047e-06
ENSRNOT00000041210	LOC102555453-202	ENSRNOG00000029115.5	7:59762501-59763219	718	2.61832e-08	3.78487	5.72172e-06
ENSRNOT00000081016	Erp29-202	ENSRNOG00000001348.5	12:40619391-40625590	783	2.65965e-08	68.2176	5.79978e-06
ENSRNOT00000074586	Cebpd-201	ENSRNOG00000050869.2	11:89008007-89009146	1139	2.72343e-08	3.9357	5.92636e-06
ENSRNOT00000019767	Fahd1-201	ENSRNOG00000014727.6	10:14214518-14215957	1439	2.77833e-08	2.58803	6.03312e-06
ENSRNOT00000090857	Chga-201	ENSRNOG00000052549.1	6:126434225-126445568	1882	2.90314e-08	3.3481	6.25161e-06
ENSRNOT00000085251	Spsb1-202	ENSRNOG00000017212.7	5:166913734-166924136	2811	2.90193e-08	3.83058	6.25161e-06
ENSRNOT00000005910	Btg1-201	ENSRNOG00000004284.4	7:37812830-37815088	1462	3.02363e-08	3.02782	6.48405e-06
ENSRNOT00000084782	Mat2a-202	ENSRNOG00000013520.6	4:100296074-100303080	3346	3.14582e-08	2.45563	6.71822e-06
ENSRNOT00000008737	Fkbp4-201	ENSRNOG00000006444.6	4:161748992-161757447	2845	3.18843e-08	2.29963	6.78119e-06
ENSRNOT00000007197	Csrnp3-201	ENSRNOG00000005359.7	3:51883558-52120290	2535	3.18381e-08	34.8481	6.78119e-06
ENSRNOT00000022095	Clu-201	ENSRNOG00000016460.7	15:42653147-42665857	1644	3.22621e-08	2.72757	6.83343e-06
ENSRNOT00000050931	Snrpg-201	ENSRNOG00000032232.3	1:91588227-91588609	382	3.31891e-08	-10.3965	6.97262e-06
ENSRNOT00000026408	Agpat2-201	ENSRNOG00000019466.7	3:4044541-4055806	1107	4.18361e-08	-3.36887	8.63134e-06
ENSRNOT00000064305	Pvr-201	ENSRNOG00000019202.8	1:80820049-80835701	2164	4.5261e-08	5.78028	9.28237e-06
ENSRNOT00000026803	Ncoa4-201	ENSRNOG00000019768.7	16:8309238-8323293	3369	4.96781e-08	3.14255	1.01016e-05
ENSRNOT00000024798	Uts2-201	ENSRNOG00000018393.4	5:168078747-168084145	539	5.05825e-08	21.5444	1.02517e-05
ENSRNOT00000022713	Paqr7-201	ENSRNOG00000022054.2	5:152708774-152720229	2233	5.39544e-08	-3.54268	1.08079e-05
ENSRNOT00000046313	Arntl-201	ENSRNOG00000014448.8	1:178039062-178137465	2973	5.72648e-08	17.675	1.14048e-05
ENSRNOT00000077742	Ece1-202	ENSRNOG00000014241.7	5:156215433-156318648	4469	6.20466e-08	30.3657	1.23333e-05
ENSRNOT00000089407	Rpl3-202	ENSRNOG00000016896.8	7:121297413-121302025	1212	6.86184e-08	202.765	1.35614e-05
ENSRNOT00000022786	Dolk-201	ENSRNOG00000016989.3	3:8850153-8852192	2039	6.98632e-08	-2.84113	1.37752e-05
ENSRNOT00000040261	LOC108349682-201	ENSRNOG00000032303.2	1:219395275-219395623	348	7.05397e-08	-3.20804	1.38616e-05
ENSRNOT00000011054	Bsdc1-201	ENSRNOG00000008338.7	5:147661617-147689759	2680	7.35654e-08	2.31091	1.44014e-05
ENSRNOT00000071528	Gatd1-201	ENSRNOG00000046382.2	1:214389254-214394411	880	7.46756e-08	-34.1915	1.45911e-05
ENSRNOT00000016193	Slc18a1-201	ENSRNOG00000011992.4	16:22361997-22395183	2361	7.75519e-08	4.83212	1.5096e-05
ENSRNOT00000025608	Nutf2-201	ENSRNOG00000018945.4	19:37830916-37852189	1927	8.14078e-08	3.58679	1.57872e-05
ENSRNOT00000064910	Rnf10-201	ENSRNOG00000001172.7	12:47103313-47138128	4100	8.51083e-08	2.41962	1.64431e-05
ENSRNOT00000020192	Hagh-201	ENSRNOG00000014743.5	10:14216154-14230515	1184	8.55774e-08	2.50311	1.64721e-05
ENSRNOT00000080585	LOC108348112-202	ENSRNOG00000000461.7	20:5262465-5269337	3379	9.38344e-08	2.98717	1.7829e-05
ENSRNOT00000059666	Naa50-201	ENSRNOG00000039017.5	11:61510993-61530830	1837	9.36616e-08	3.8846	1.7829e-05
ENSRNOT00000028066	Icam1-201	ENSRNOG00000020679.6	8:22035255-22047059	2643	9.37245e-08	6.32351	1.7829e-05
ENSRNOT00000050213	Ybx1-ps3-201	ENSRNOG00000032902.3	10:40380387-40381886	1499	9.54962e-08	2.5484	1.81115e-05
ENSRNOT00000092133	Scn1b-203	ENSRNOG00000021102.5	1:89550737-89559960	1281	1.00965e-07	-5.28119	1.89401e-05
ENSRNOT00000072129	Uspl1-202	ENSRNOG00000000909.8	12:6930017-6956914	3591	1.03868e-07	4.63279	1.94494e-05
ENSRNOT00000047717	Impdh2-201	ENSRNOG00000031965.4	8:117347028-117351610	1639	1.12686e-07	2.00342	2.10244e-05
ENSRNOT00000057176	Pacsin3-201	ENSRNOG00000014204.7	3:80072488-80081033	1730	1.15719e-07	21.9687	2.15514e-05
ENSRNOT00000023189	Cdr2-201	ENSRNOG00000017260.6	1:190889700-190914610	2349	1.16362e-07	6.05212	2.16322e-05
ENSRNOT00000051155	Hdlbp-201	ENSRNOG00000031479.4	9:100556391-100624638	4386	1.19315e-07	2.27914	2.20621e-05
ENSRNOT00000011392	Ppcs-201	ENSRNOG00000008572.6	5:138466292-138470096	1725	1.20964e-07	-5.28877	2.22869e-05
ENSRNOT00000081140	Gstt2-202	ENSRNOG00000052415.1	20:13760809-13764475	1375	1.25185e-07	-2.73895	2.2983e-05
ENSRNOT00000041950	Slc6a5-201	ENSRNOG00000031662.4	1:105284752-105336363	7059	1.30049e-07	5.41269	2.38339e-05
ENSRNOT00000014271	Prcp-201	ENSRNOG00000010630.6	1:157701088-157750169	2362	1.39757e-07	4.89029	2.53433e-05
ENSRNOT00000028767	Bola1-201	ENSRNOG00000021185.4	2:198338113-198339130	746	1.49822e-07	-107.549	2.69791e-05
ENSRNOT00000010645	Rab3b-201	ENSRNOG00000008001.7	5:128501846-128568188	1149	1.69899e-07	3.57302	3.0226e-05
ENSRNOT00000002809	Igfbp7-201	ENSRNOG00000002050.4	14:33010299-33070190	1102	1.8518e-07	2.03094	3.25523e-05
ENSRNOT00000082156	Lrat-202	ENSRNOG00000025608.4	2:181896304-181900856	4522	1.96992e-07	3.03033	3.4453e-05
ENSRNOT00000006995	Mia2-201	ENSRNOG00000005101.8	6:80218879-80286546	2391	2.0134e-07	3.31042	3.49766e-05
ENSRNOT00000020528	Ccn2-201	ENSRNOG00000015036.6	1:21851659-21854773	2333	2.02789e-07	3.18494	3.51693e-05
ENSRNOT00000011237	Plpp3-201	ENSRNOG00000008116.5	5:124690213-124765498	3079	2.06916e-07	2.20294	3.57649e-05
ENSRNOT00000027834	Fads1-201	ENSRNOG00000020480.5	1:226234073-226249138	3416	2.53393e-07	-3.31092	4.30781e-05
ENSRNOT00000007583	Srsf5-201	ENSRNOG00000005513.7	6:104611025-104615302	1180	2.56389e-07	-2.69624	4.35158e-05
ENSRNOT00000002500	Med21-201	ENSRNOG00000001820.7	4:180961141-180968123	794	2.72461e-07	8.32678	4.59419e-05
ENSRNOT00000010679	Scg5-201	ENSRNOG00000007542.6	3:105235049-105279462	1189	2.85925e-07	3.22443	4.79774e-05
ENSRNOT00000024583	Zfand5-201	ENSRNOG00000018107.5	1:238843337-238852566	2147	3.07154e-07	2.05007	5.12071e-05
ENSRNOT00000024840	Nt5dc2-201	ENSRNOG00000018358.4	16:7212487-7220540	1797	3.11202e-07	3.71902	5.1715e-05
ENSRNOT00000088123	Hiatl3-202	ENSRNOG00000050407.2	1:69789109-69820976	2567	3.13597e-07	4.74793	5.19569e-05
ENSRNOT00000047633	Rexo2-201	ENSRNOG00000018939.7	8:52802605-52814321	1183	3.32149e-07	45.283	5.46687e-05
ENSRNOT00000080266	Pacsin3-202	ENSRNOG00000014204.7	3:80075990-80081047	1756	3.40063e-07	-4.29131	5.5529e-05
ENSRNOT00000003343	Ifi47-201	ENSRNOG00000002470.8	10:34277992-34285623	1874	3.60448e-07	-2.49631	5.83051e-05
ENSRNOT00000086678	Hes6-202	ENSRNOG00000020194.7	9:98550021-98551438	1023	3.63116e-07	2.53434	5.8645e-05
ENSRNOT00000066165	Kdm4a-201	ENSRNOG00000019956.7	5:136967649-137014375	4421	3.76461e-07	-38.6104	6.07054e-05
ENSRNOT00000045401	AABR07035539.1-201	ENSRNOG00000039249.3	12:19159467-19159901	434	4.48099e-07	-7.83993	7.10382e-05
ENSRNOT00000015767	Pnpla3-201	ENSRNOG00000022268.6	7:125034763-125055976	3215	4.90199e-07	-22.637	7.67704e-05
ENSRNOT00000035916	Gnas-201	ENSRNOG00000025889.5	3:172374956-172428483	1637	4.98835e-07	4.2618	7.78869e-05
ENSRNOT00000019062	Ogfrl1-201	ENSRNOG00000014142.6	9:29634178-29647903	1705	5.00397e-07	3.5993	7.80128e-05
ENSRNOT00000057158	AABR07071891.1-201	ENSRNOG00000037673.3	1:84573495-84573959	464	5.09321e-07	-2.58436	7.90465e-05
ENSRNOT00000020838	Mbtps1-201	ENSRNOG00000015173.7	19:52147126-52186260	3159	5.14417e-07	-42.3477	7.95983e-05
ENSRNOT00000011799	Tmem268-201	ENSRNOG00000008712.6	5:79383510-79407433	3795	5.21143e-07	-3.12581	8.04599e-05
ENSRNOT00000005608	Mgat2-201	ENSRNOG00000004234.5	6:91476697-91479183	2486	5.21542e-07	2.22217	8.04599e-05
ENSRNOT00000087662	Gpd1-201	ENSRNOG00000056457.1	7:141370490-141377928	2871	5.80345e-07	-3.02901	8.8737e-05
ENSRNOT00000027234	Slc16a1-201	ENSRNOG00000019996.5	2:207108551-207128554	2487	6.0643e-07	6.16723	9.18686e-05
ENSRNOT00000079279	Ppm1b-203	ENSRNOG00000030667.6	6:8220227-8271054	2569	6.12685e-07	2.50483	9.2584e-05
ENSRNOT00000072431	AABR07064061.1-201	ENSRNOG00000045967.2	6:62796950-62798384	1434	6.13566e-07	9.34403	9.2584e-05
ENSRNOT00000008325	Ndufa5-201	ENSRNOG00000005698.2	4:51590412-51598771	546	6.20766e-07	3.31126	9.33977e-05
ENSRNOT00000057179	LOC100910833-201	ENSRNOG00000046275.2	6:131602412-131648661	1143	6.62805e-07	-41.6366	9.88594e-05
ENSRNOT00000028143	Pten-201	ENSRNOG00000020723.3	1:251421595-251487832	1628	6.73744e-07	10.6323	0.000100346
ENSRNOT00000065195	Sucla2-201	ENSRNOG00000017481.6	15:55461694-55516952	2092	6.90345e-07	102.691	0.000102671
ENSRNOT00000001383	Tpt1-201	ENSRNOG00000001049.7	15:57891679-57894504	793	7.0119e-07	2.44581	0.000103984
ENSRNOT00000041891	Apoe-201	ENSRNOG00000018454.7	1:80612894-80615704	1184	7.08567e-07	2.6278	0.000104906
ENSRNOT00000018682	Cbln2-201	ENSRNOG00000013654.4	18:83777664-83782930	2348	7.89606e-07	6.11237	0.000115603
ENSRNOT00000027268	Upf1-201	ENSRNOG00000020134.7	16:20825043-20845213	3894	8.38409e-07	-7.69429	0.000121885
ENSRNOT00000001205	Medag-201	ENSRNOG00000000906.7	12:6711746-6740714	2221	8.57911e-07	-3.22353	0.000124371
ENSRNOT00000075286	Jmy-201	ENSRNOG00000050343.3	2:23042188-23097610	2910	8.62999e-07	7.92137	0.000124933
ENSRNOT00000021550	Id4-201	ENSRNOG00000016099.2	17:16692556-16695126	1626	8.78193e-07	7.64919	0.000126601
ENSRNOT00000027860	Htra1-201	ENSRNOG00000020533.4	1:201499027-201548513	2056	9.96726e-07	2.25219	0.000142496
ENSRNOT00000067875	Spp1-201	ENSRNOG00000043451.4	14:6673685-6679901	1467	1.00548e-06	7.94675	0.000143354
ENSRNOT00000045083	Ndufa4l2-201	ENSRNOG00000031851.5	7:70821956-70824085	943	1.16938e-06	2.86328	0.000164004
ENSRNOT00000031464	Cmss1-201	ENSRNOG00000027888.6	11:45304067-45330481	970	1.2142e-06	5.55852	0.0001696
ENSRNOT00000000911	MGC95208-201	ENSRNOG00000000720.5	11:1814293-1819094	1474	1.23702e-06	3.14466	0.000172089
ENSRNOT00000061041	AC094217.1-201	ENSRNOG00000039783.1	1:31527645-31528083	438	1.24078e-06	-6.6587	0.000172149
ENSRNOT00000030837	Parl-201	ENSRNOG00000023271.7	11:84517367-84544462	1317	1.23992e-06	-3.77255	0.000172149
ENSRNOT00000090051	Atp5mc2-202	ENSRNOG00000015320.7	7:144264198-144269486	626	1.28781e-06	-5.98	0.000177578
ENSRNOT00000050236	Eloc-201	ENSRNOG00000031730.5	5:2042990-2059351	2027	1.30308e-06	4.22183	0.000179109
ENSRNOT00000024264	Nars1-201	ENSRNOG00000017852.8	18:59986359-60002569	2605	1.34135e-06	17.8165	0.000184125
ENSRNOT00000075602	Gmfb-201	ENSRNOG00000047250.2	15:23601367-23606634	459	1.3615e-06	4.52296	0.000186449
ENSRNOT00000024310	Ahcy-201	ENSRNOG00000017777.3	3:150587832-150603082	2054	1.36665e-06	2.27147	0.000186854
ENSRNOT00000009870	Maged1-201	ENSRNOG00000006756.8	X:63803188-63809861	2822	1.39124e-06	2.42574	0.000189713
ENSRNOT00000014216	Lgals3-201	ENSRNOG00000010645.5	15:24153601-24165537	948	1.43204e-06	-6.00241	0.00019502
ENSRNOT00000081240	RT1-A1-204	ENSRNOG00000038999.4	20:5351620-5418013	1561	1.44273e-06	9.87566	0.000195959
ENSRNOT00000079995	Cyp2t1-202	ENSRNOG00000028891.4	1:83965607-83969559	1890	1.45073e-06	3.38874	0.000196787
ENSRNOT00000073986	Plcxd1-202	ENSRNOG00000049866.2	12:52641221-52644260	960	1.50943e-06	21.2363	0.000203947
ENSRNOT00000028779	Hist1h2bq-201	ENSRNOG00000021198.4	17:43679924-43689311	949	1.52034e-06	2.17741	0.000205152
ENSRNOT00000012325	Tra2a-201	ENSRNOG00000009156.7	4:78905379-78924181	1857	1.52943e-06	2.24636	0.00020611
ENSRNOT00000033984	Trafd1-201	ENSRNOG00000001351.6	12:40695519-40709438	2466	1.53236e-06	-2.7819	0.000206236
ENSRNOT00000014277	Atoh8-201	ENSRNOG00000010716.3	4:100067340-100099517	2375	1.59436e-06	5.22735	0.000213745
ENSRNOT00000011592	Cdk16-201	ENSRNOG00000008578.8	X:1708277-1714061	1748	1.60204e-06	-7.57734	0.000214497
ENSRNOT00000065065	Fdps-202	ENSRNOG00000043377.4	2:188403594-188413219	1271	1.7095e-06	8.91673	0.00022712
ENSRNOT00000027677	Gsk3a-201	ENSRNOG00000020417.5	1:82097847-82108083	1449	1.75408e-06	-4.57711	0.000231335
ENSRNOT00000001720	Mafk-201	ENSRNOG00000001277.4	12:16923989-16934706	2645	1.75087e-06	2.87196	0.000231335
ENSRNOT00000006483	Arf2-201	ENSRNOG00000004807.6	10:92018561-92040333	2177	1.77278e-06	2.45749	0.000232537
ENSRNOT00000078657	Yif1a-202	ENSRNOG00000020201.6	1:220470128-220474129	1030	1.91362e-06	-23.3078	0.00025006
ENSRNOT00000016756	Cln8-201	ENSRNOG00000012565.4	16:79828323-79838212	2222	2.04671e-06	5.06356	0.000265106
ENSRNOT00000011610	Oser1-201	ENSRNOG00000008297.5	3:159784127-159802952	1621	2.05406e-06	2.01992	0.000265724
ENSRNOT00000009951	Hoxb9-201	ENSRNOG00000007573.4	10:84119883-84123390	937	2.06581e-06	3.35446	0.000266577
ENSRNOT00000013286	Aif1l-201	ENSRNOG00000009951.5	3:9237943-9262628	3070	2.1604e-06	-2.40032	0.000276711
ENSRNOT00000086530	Pex16-203	ENSRNOG00000006539.7	3:81287241-81292573	1221	2.32903e-06	-2.28525	0.000295381
ENSRNOT00000090085	LOC102553386-201	ENSRNOG00000053557.1	10:72147815-72148783	968	2.58114e-06	2.2778	0.000325359
ENSRNOT00000059807	RGD1309104-201	ENSRNOG00000028236.6	13:69265648-69385074	1664	2.70097e-06	2.09486	0.000338577
ENSRNOT00000005383	Dusp1-201	ENSRNOG00000003977.5	10:16970625-16973418	1936	2.70238e-06	9.95991	0.000338577
ENSRNOT00000086605	Chtopl1-201	ENSRNOG00000058457.1	4:163118451-163119391	802	2.74584e-06	3.05707	0.000343191
ENSRNOT00000084171	Cyp1b1-203	ENSRNOG00000040287.4	6:2307807-2311781	3974	2.75253e-06	2.29743	0.000343611
ENSRNOT00000041880	LOC100364435-202	ENSRNOG00000042499.1	4:100882221-100883038	541	2.80506e-06	-39.6793	0.000348485
ENSRNOT00000018782	Zc3hav1-201	ENSRNOG00000013948.5	4:66011914-66062089	5081	2.85729e-06	2.31175	0.000354547
ENSRNOT00000064596	Eloa-201	ENSRNOG00000010902.6	5:154347390-154363329	3491	2.92838e-06	9.76082	0.000361616
ENSRNOT00000015570	Clstn3-201	ENSRNOG00000011156.3	4:157043924-157078130	3947	2.98093e-06	3.81022	0.000366371
ENSRNOT00000002187	Adamts1-201	ENSRNOG00000001607.7	11:25342125-25350974	4400	3.04121e-06	5.76785	0.000373336
ENSRNOT00000006720	LOC100911917-201	ENSRNOG00000005059.5	3:4861752-4866833	1333	3.05159e-06	-35.538	0.000374165
ENSRNOT00000083464	Ewsr1-202	ENSRNOG00000009437.7	14:85322295-85350948	2364	3.2061e-06	-5.37414	0.000391254
ENSRNOT00000085760	Abtb2-202	ENSRNOG00000008510.6	3:93495105-93647721	3075	3.27305e-06	5.64748	0.000398954
ENSRNOT00000026224	Stx4-201	ENSRNOG00000019302.3	1:199287894-199294979	974	3.40103e-06	-49.1141	0.000413577
ENSRNOT00000004901	Tbl1x-201	ENSRNOG00000003686.7	X:44907520-44988551	5017	3.41937e-06	-11.6598	0.000415319
ENSRNOT00000061139	Pnisr-201	ENSRNOG00000008782.6	5:35991067-36017944	4104	3.63968e-06	-2.41857	0.0004397
ENSRNOT00000037381	Mettl26-202	ENSRNOG00000021615.7	10:15241593-15242904	612	3.64137e-06	2.17291	0.0004397
ENSRNOT00000007917	Thg1l-201	ENSRNOG00000005539.7	10:31043687-31052102	2327	3.8013e-06	10.7083	0.000456346
ENSRNOT00000039149	Tmem130-201	ENSRNOG00000025235.6	12:11814070-11840100	2758	3.82557e-06	5.77825	0.000458195
ENSRNOT00000016947	Eef1a2-201	ENSRNOG00000012477.4	3:176657106-176666282	2011	3.8364e-06	5.20526	0.00045896
ENSRNOT00000057386	Col4a1-201	ENSRNOG00000016281.5	16:83522161-83632153	6579	3.85619e-06	3.71816	0.000460795
ENSRNOT00000025067	Hspa5-201	ENSRNOG00000018294.6	3:13838303-13842762	2562	3.99329e-06	2.12025	0.000474172
ENSRNOT00000012767	Zrsr1-201	ENSRNOG00000009639.5	14:107750161-107751892	1731	4.0867e-06	3.01295	0.000482207
ENSRNOT00000034334	Lrrc58-201	ENSRNOG00000027151.5	11:65747035-65759581	1377	4.11504e-06	5.54564	0.000484445
ENSRNOT00000026652	Gdf15-201	ENSRNOG00000019661.3	16:20555394-20557978	912	4.12018e-06	5.84664	0.000484499
ENSRNOT00000028179	Sap18-201	ENSRNOG00000020771.4	10:89635674-89636193	519	4.13666e-06	2.14572	0.000485332
ENSRNOT00000018622	Rbp1-201	ENSRNOG00000013794.4	8:106449320-106470842	696	4.13446e-06	-9.19399	0.000485332
ENSRNOT00000010674	Yars1-201	ENSRNOG00000007213.5	5:147375349-147403571	2433	4.21115e-06	5.38632	0.000492395
ENSRNOT00000004713	Adamts4-201	ENSRNOG00000003538.7	13:89622631-89634419	5637	4.264e-06	24.5871	0.000496888
ENSRNOT00000075989	Spp1-202	ENSRNOG00000043451.4	14:6673745-6679878	1436	4.57499e-06	7.28119	0.000528362
ENSRNOT00000026753	Resp18-201	ENSRNOG00000019704.3	9:82470793-82477136	719	4.58736e-06	2.47239	0.0005292
ENSRNOT00000027910	Lipe-201	ENSRNOG00000020546.5	1:82248045-82266727	3704	4.67808e-06	-4.20863	0.000536671
ENSRNOT00000026734	Tm9sf1-201	ENSRNOG00000019710.6	15:34314655-34322115	2405	4.89348e-06	-7.64614	0.0005589
ENSRNOT00000047936	Rpl21-203	ENSRNOG00000032803.5	X:10430846-10431400	554	4.9054e-06	2.01592	0.000559643
ENSRNOT00000013392	Slc33a1-201	ENSRNOG00000010023.6	2:154520174-154542557	1970	5.14519e-06	-8.13146	0.000585708
ENSRNOT00000030290	Tmem186-201	ENSRNOG00000027087.2	10:7077487-7080798	2043	5.33429e-06	-2.65383	0.000605234
ENSRNOT00000015420	Scp2-201	ENSRNOG00000011413.7	5:127647933-127735703	2569	5.3515e-06	3.63858	0.000606521
ENSRNOT00000007061	Trip11-201	ENSRNOG00000005292.7	6:125742795-125812517	8348	5.55798e-06	4.69501	0.000625125
ENSRNOT00000093099	Eri3-204	ENSRNOG00000019381.9	5:136406129-136533071	1328	5.72325e-06	32.7682	0.000642316
ENSRNOT00000003486	Hand1-201	ENSRNOG00000002582.5	10:43250744-43253296	1057	6.59849e-06	9.78095	0.000724034
ENSRNOT00000008972	Calu-202	ENSRNOG00000006197.7	4:56625610-56653111	3166	6.67643e-06	16.5235	0.000731809
ENSRNOT00000071625	Pex5-201	ENSRNOG00000049203.3	4:156983914-157009674	3170	6.69742e-06	2.24125	0.000733332
ENSRNOT00000026258	Tef-201	ENSRNOG00000019383.7	7:123043502-123058604	4163	6.78287e-06	-2.78157	0.000740336
ENSRNOT00000091597	Dbp-202	ENSRNOG00000021027.6	1:101687895-101692845	1249	6.81446e-06	-3.46398	0.000742216
ENSRNOT00000025157	Hbegf-201	ENSRNOG00000018646.6	18:29329763-29340403	2305	6.87021e-06	10.8835	0.000747501
ENSRNOT00000011589	Arhgap32-201	ENSRNOG00000008709.6	8:33239138-33392305	9935	7.28006e-06	8.96736	0.000787946
ENSRNOT00000028892	Chgb-201	ENSRNOG00000021269.5	3:125428259-125441594	2533	7.36522e-06	4.48	0.000794059
ENSRNOT00000017452	Tusc3-201	ENSRNOG00000013061.6	16:56247658-56396502	2164	7.43745e-06	2.90463	0.000799124
ENSRNOT00000090211	Nsfl1c-202	ENSRNOG00000008604.7	3:146981983-147005439	1255	7.49916e-06	18.0435	0.000804083
ENSRNOT00000000525	RT1-Bb-201	ENSRNOG00000032708.5	20:4043740-4049711	1844	7.57484e-06	5.45488	0.000810516
ENSRNOT00000003020	Stbd1-201	ENSRNOG00000002218.5	14:16976355-16979760	1933	7.74916e-06	2.72062	0.000825774
ENSRNOT00000080410	Bcat1-202	ENSRNOG00000015514.7	4:179259307-179339795	2497	7.95014e-06	5.48109	0.000844553
ENSRNOT00000043171	Rpl36al-201	ENSRNOG00000031315.2	10:57251252-57251573	321	8.19265e-06	2.76033	0.000868169
ENSRNOT00000008734	Snap25-202	ENSRNOG00000006037.8	3:129599352-129788400	1716	8.31451e-06	6.66699	0.000878745
ENSRNOT00000035411	Lrat-201	ENSRNOG00000025608.4	2:181900498-181905300	1092	8.36346e-06	4.69421	0.000882572
ENSRNOT00000025433	Psmd5-201	ENSRNOG00000018809.7	3:13916202-13933658	2213	8.3678e-06	-2.27293	0.000882572
ENSRNOT00000068078	Sat1-201	ENSRNOG00000003809.7	X:43626479-43629765	1164	8.49073e-06	-13.1465	0.000893714
ENSRNOT00000088689	LOC100365363-201	ENSRNOG00000059492.1	1:60884760-60894948	4405	9.1287e-06	-3.93423	0.00095503
ENSRNOT00000077541	AABR07045684.1-201	ENSRNOG00000052347.1	KL568128.1:56-3244	1914	9.14801e-06	5.28779	0.000956083
ENSRNOT00000011019	Ccnq-201	ENSRNOG00000022582.2	10:66019519-66020682	1163	9.24659e-06	-2.775	0.000964435
ENSRNOT00000018133	Depp1-201	ENSRNOG00000023465.4	4:148782478-148784562	1265	9.69314e-06	3.11345	0.00100493
ENSRNOT00000042283	Cbr1-201	ENSRNOG00000047848.2	11:33812988-33815418	1041	1.00831e-05	2.07235	0.00103807
ENSRNOT00000000336	Smpd2-201	ENSRNOG00000000306.5	20:46211891-46215120	1666	1.01212e-05	-5.99993	0.00104095
ENSRNOT00000003735	Sstr2-201	ENSRNOG00000002793.5	10:102136282-102143434	2088	1.02584e-05	2.63939	0.00105402
ENSRNOT00000060865	Aktip-201	ENSRNOG00000011956.5	19:17290177-17300050	1704	1.1761e-05	2.33796	0.00119065
ENSRNOT00000020907	Mfsd14a-201	ENSRNOG00000015502.7	2:219662063-219693629	1856	1.20098e-05	16.6849	0.00121465
ENSRNOT00000088442	Fxr1-201	ENSRNOG00000051480.1	2:120512898-120570355	2097	1.24219e-05	2.42642	0.00125021
ENSRNOT00000009691	Zfp691-201	ENSRNOG00000007398.4	5:138217844-138222534	1459	1.24855e-05	-2.65657	0.00125417
ENSRNOT00000020419	Spryd7-201	ENSRNOG00000015095.7	15:41870761-41890716	1372	1.26414e-05	-7.08859	0.0012686
ENSRNOT00000073910	Ifrd1-201	ENSRNOG00000050997.1	6:60132023-60151420	1791	1.2796e-05	2.47548	0.00128162
ENSRNOT00000010263	Nap1l5-201	ENSRNOG00000007808.3	4:89149316-89151184	1609	1.32277e-05	3.6932	0.00131847
ENSRNOT00000022253	Fgfr2-201	ENSRNOG00000016374.8	1:200590952-200696928	4624	1.33345e-05	2.75544	0.00132529
ENSRNOT00000004081	Ttyh2-201	ENSRNOG00000024578.7	10:103206013-103248862	2742	1.36349e-05	-2.92397	0.00134995
ENSRNOT00000035312	Pomgnt1-201	ENSRNOG00000023455.5	5:135007342-135017218	2712	1.45392e-05	4.10186	0.00143035
ENSRNOT00000020493	LOC100911548-201	ENSRNOG00000015125.5	4:157326726-157328379	1213	1.45439e-05	-2.36015	0.00143035
ENSRNOT00000080822	Ier3-202	ENSRNOG00000000827.6	20:3438967-3439983	1016	1.48257e-05	31.3767	0.00145254
ENSRNOT00000068433	Myo1b-201	ENSRNOG00000048152.2	9:54558201-54766054	3609	1.49039e-05	2.40038	0.00145744
ENSRNOT00000072533	AABR07016141.1-201	ENSRNOG00000046536.1	14:94590764-94602088	507	1.51815e-05	-4.25019	0.00148178
ENSRNOT00000039551	Ddx3x-201	ENSRNOG00000023383.6	X:10400365-10413984	4363	1.52489e-05	-29.6083	0.00148556
ENSRNOT00000071913	Atp5f1e-201	ENSRNOG00000049912.2	3:172563104-172566010	375	1.53497e-05	-246.385	0.00149256
ENSRNOT00000071664	Rhoa-201	ENSRNOG00000050519.2	8:117106575-117116167	1584	1.53447e-05	-57.8004	0.00149256
ENSRNOT00000015122	Ckb-201	ENSRNOG00000010872.5	6:136142955-136145837	1429	1.60243e-05	4.39873	0.00154797
ENSRNOT00000005156	Rgs2-201	ENSRNOG00000003687.6	13:60846307-60849094	868	1.64019e-05	77.4835	0.00158148
ENSRNOT00000076292	Gmps-201	ENSRNOG00000051151.2	2:154555870-154576770	1476	1.69522e-05	-20.8737	0.00162847
ENSRNOT00000086293	LOC103690108-202	ENSRNOG00000047706.3	20:3791839-3794027	847	1.70021e-05	3.18436	0.00163023
ENSRNOT00000016205	Csad-201	ENSRNOG00000011573.6	7:143781780-143793970	2024	1.69871e-05	-2.57728	0.00163023
ENSRNOT00000091765	Hnrnpf-203	ENSRNOG00000014562.6	4:149970566-149978895	2229	1.70746e-05	2.73003	0.00163415
ENSRNOT00000072534	Cbx2-201	ENSRNOG00000049215.1	10:108132104-108140935	3750	1.71234e-05	5.92931	0.00163731
ENSRNOT00000048996	LOC100912195-201	ENSRNOG00000033844.4	1:116565789-116567189	709	1.73536e-05	4.26458	0.00165167
ENSRNOT00000022331	Fgfr2-202	ENSRNOG00000016374.8	1:200590952-200696928	4282	1.75202e-05	3.93456	0.00166294
ENSRNOT00000003449	C1galt1c1-201	ENSRNOG00000002536.6	X:124921727-124926171	1313	1.75567e-05	5.57836	0.00166488
ENSRNOT00000019108	Acad9-201	ENSRNOG00000014178.5	2:122782059-122805768	2517	1.79365e-05	-3.3417	0.00169004
ENSRNOT00000012760	Pdk4-201	ENSRNOG00000009565.4	4:30546663-30556814	1573	1.79262e-05	4.02032	0.00169004
ENSRNOT00000044226	Septin4-201	ENSRNOG00000007367.8	10:74874129-74884196	1406	1.81119e-05	-4.42858	0.00170501
ENSRNOT00000091946	Coa8-202	ENSRNOG00000058920.1	6:136279495-136304095	582	1.81501e-05	4.43959	0.00170686
ENSRNOT00000076924	Etnk2-203	ENSRNOG00000028368.7	13:50481162-50499140	2199	1.81645e-05	-2.18852	0.00170686
ENSRNOT00000088270	LOC100909595-203	ENSRNOG00000008376.6	4:155549985-155631856	3813	1.83953e-05	3.48113	0.00172384
ENSRNOT00000003780	Tob1-201	ENSRNOG00000002828.7	10:81913688-81915716	2028	1.85438e-05	-3.49104	0.00173618
ENSRNOT00000086571	Grsf1-202	ENSRNOG00000003392.7	14:21041620-21056452	2599	1.86595e-05	-3.24615	0.00174544
ENSRNOT00000030491	Rfk-201	ENSRNOG00000022273.6	1:236494220-236501733	2211	1.91275e-05	2.08822	0.00178437
ENSRNOT00000083017	Herc4-201	ENSRNOG00000061040.1	20:26755910-26830931	3834	1.92773e-05	2.08978	0.0017951
ENSRNOT00000038764	Coa4-201	ENSRNOG00000025385.3	1:165549343-165552572	1363	1.92699e-05	30.8981	0.0017951
ENSRNOT00000017461	Hyal2-201	ENSRNOG00000031420.2	8:116325285-116328978	1880	1.93215e-05	-3.21667	0.0017976
ENSRNOT00000048764	Dhx30-201	ENSRNOG00000029194.5	8:118160387-118187791	3585	1.96029e-05	28.9637	0.00182213
ENSRNOT00000014865	Ccl5-201	ENSRNOG00000010906.6	10:70739799-70744315	545	2.06278e-05	39.9216	0.00190882
ENSRNOT00000079415	Tmem150a-201	ENSRNOG00000061100.1	4:100218660-100222130	1450	2.14609e-05	2.73051	0.00198236
ENSRNOT00000082138	Ubr4-202	ENSRNOG00000018183.7	5:157848210-157956132	15961	2.22457e-05	3.47079	0.00204389
ENSRNOT00000016984	Vamp5-201	ENSRNOG00000012659.5	4:100231560-100232559	306	2.26468e-05	-6.10419	0.0020789
ENSRNOT00000020401	Tent5c-201	ENSRNOG00000015222.5	2:202798197-202816562	2023	2.3088e-05	5.85344	0.00211377
ENSRNOT00000010151	Il23r-201	ENSRNOG00000007544.5	4:98203957-98305173	1875	2.3349e-05	5.87105	0.00213389
ENSRNOT00000085877	Col13a1-202	ENSRNOG00000000552.7	20:31458321-31597830	2217	2.37852e-05	29.3553	0.00216038
ENSRNOT00000017708	Pdcd5-201	ENSRNOG00000013250.5	1:91173472-91178801	657	2.46068e-05	-3.66055	0.00222718
ENSRNOT00000016121	Sgk1-201	ENSRNOG00000011815.8	1:24185455-24190896	2439	2.48255e-05	4.13607	0.00224304
ENSRNOT00000011650	Tspan18-201	ENSRNOG00000008758.5	3:82097067-82236664	3716	2.49352e-05	3.3255	0.00225099
ENSRNOT00000091814	Rorb-202	ENSRNOG00000013413.7	1:234252756-234435839	2366	2.53679e-05	19.7225	0.00227811
ENSRNOT00000082136	RT1-Bb-203	ENSRNOG00000032708.5	20:4039412-4047093	657	2.60428e-05	-42.2685	0.00232458
ENSRNOT00000003248	Uchl1-201	ENSRNOG00000002343.7	14:43133217-43143973	1064	2.61165e-05	3.32509	0.00232914
ENSRNOT00000072509	Cox19-201	ENSRNOG00000050052.1	12:17395623-17405103	2648	2.69118e-05	-27.4259	0.00238977
ENSRNOT00000026428	Stard10-201	ENSRNOG00000019491.6	1:166433108-166457505	1250	2.75112e-05	-2.75079	0.0024388
ENSRNOT00000085653	Pgk1-202	ENSRNOG00000058249.1	X:77278239-77279367	567	2.79393e-05	-42.7644	0.00247381
ENSRNOT00000085000	Cisd3-202	ENSRNOG00000036894.4	10:85628490-85631657	598	2.7954e-05	-9.27869	0.00247381
ENSRNOT00000017636	Arnt2-201	ENSRNOG00000013017.7	1:146399216-146556171	6220	2.83603e-05	4.30723	0.00250547
ENSRNOT00000064588	Golim4-202	ENSRNOG00000024213.6	2:174322672-174413236	2443	2.87911e-05	6.5459	0.00254136
ENSRNOT00000070933	Nudt13-201	ENSRNOG00000048195.2	15:4434312-4454958	2549	3.04648e-05	-3.75872	0.00265285
ENSRNOT00000090426	Slc25a12-202	ENSRNOG00000022922.6	3:57882420-57913999	1149	3.07927e-05	-12.093	0.00267547
ENSRNOT00000019560	Smc3-201	ENSRNOG00000014173.7	1:274309757-274352838	4489	3.08799e-05	16.5143	0.00267547
ENSRNOT00000000674	Ppa1-202	ENSRNOG00000000557.5	20:31265518-31292448	1310	3.08169e-05	2.08434	0.00267547
ENSRNOT00000006306	Cd48-201	ENSRNOG00000004737.7	13:90116842-90140371	1422	3.12938e-05	18.2054	0.00270906
ENSRNOT00000057895	AC128960.1-201	ENSRNOG00000038045.4	17:78876110-78876537	427	3.16657e-05	-2.2178	0.00273896
ENSRNOT00000045574	Bcam-201	ENSRNOG00000029399.4	1:80674443-80689171	2427	3.16933e-05	2.06273	0.00273906
ENSRNOT00000071735	Bdkrb2-201	ENSRNOG00000047300.2	6:129399467-129429676	3910	3.17347e-05	5.36165	0.00274035
ENSRNOT00000001123	Csnk2b-201	ENSRNOG00000000847.8	20:5108694-5112984	928	3.27365e-05	2.00386	0.00281509
ENSRNOT00000057045	Adamts9-201	ENSRNOG00000023257.5	4:124660261-124858250	7965	3.3333e-05	4.44305	0.00285925
ENSRNOT00000075700	Ccdc9-201	ENSRNOG00000048848.2	1:78213222-78224319	1761	3.39969e-05	-2.116	0.00289697
ENSRNOT00000044582	Mt-nd4l-201	ENSRNOG00000031053.3	MT:9869-10166	297	3.42167e-05	-4.5839	0.00291329
ENSRNOT00000078077	Galnt11-202	ENSRNOG00000008117.7	4:6297257-6330699	2515	3.52296e-05	4.43118	0.00298968
ENSRNOT00000092713	AABR07044420.2-201	ENSRNOG00000062039.1	20:5347665-5347939	274	3.53896e-05	3.04586	0.0030008
ENSRNOT00000009621	Churc1-201	ENSRNOG00000007336.7	6:99817430-99831576	471	3.67389e-05	-27.2607	0.00310756
ENSRNOT00000016846	Man1b1-201	ENSRNOG00000012559.6	3:2547985-2569049	3677	3.77848e-05	2.65875	0.0031856
ENSRNOT00000044163	Vegfa-204	ENSRNOG00000019598.8	9:17340340-17355681	3342	3.86116e-05	2.0377	0.00324736
ENSRNOT00000079536	Maco1-201	ENSRNOG00000056156.1	5:153122780-153184940	3414	3.9887e-05	18.4236	0.00333293
ENSRNOT00000079774	Mybpc1-202	ENSRNOG00000056493.1	7:29091340-29152442	3474	4.1163e-05	2.70585	0.00342295
ENSRNOT00000003700	Mettl22-201	ENSRNOG00000002714.7	10:7223361-7240812	1366	4.12404e-05	8.88518	0.00342664
ENSRNOT00000007609	Vsnl1-201	ENSRNOG00000005345.5	6:37001355-37122023	1931	4.13743e-05	2.00463	0.003435
ENSRNOT00000008337	Aco1-201	ENSRNOG00000005849.7	5:56425023-56481218	3465	4.43741e-05	-2.08936	0.00364888
ENSRNOT00000012394	Osgin2-201	ENSRNOG00000009358.6	5:29663684-29682005	1946	4.51719e-05	3.66747	0.00370564
ENSRNOT00000037870	Ccp110-201	ENSRNOG00000027405.6	1:188420460-188444991	4882	4.56893e-05	9.9198	0.00374373
ENSRNOT00000010289	Apold1-201	ENSRNOG00000007830.4	4:168752132-168755023	2891	4.61563e-05	3.48413	0.00377441
ENSRNOT00000003774	Rgs4-201	ENSRNOG00000002773.2	13:88054816-88061108	2917	4.67533e-05	2.14702	0.00380517
ENSRNOT00000074024	LOC102548682-201	ENSRNOG00000049198.2	17:43791656-43792067	411	4.76956e-05	26.6395	0.00386967
ENSRNOT00000007002	Slc1a4-201	ENSRNOG00000005248.6	14:104581189-104612597	3870	4.77883e-05	7.33679	0.00387415
ENSRNOT00000048752	Brd8-201	ENSRNOG00000020340.7	18:27398939-27419281	3288	4.99082e-05	4.91254	0.00402706
ENSRNOT00000024016	Cdc123-201	ENSRNOG00000017770.7	17:76410584-76454282	1305	5.10356e-05	4.55678	0.00409883
ENSRNOT00000025362	Pmaip1-201	ENSRNOG00000018770.3	18:62174669-62181102	2763	5.24074e-05	8.448	0.00418624
ENSRNOT00000013329	Gpr180-201	ENSRNOG00000009766.7	15:103344475-103368035	1808	5.33233e-05	3.99059	0.00423974
ENSRNOT00000020219	Scg2-201	ENSRNOG00000015055.6	9:85237457-85243001	2409	5.36833e-05	4.78267	0.00425853
ENSRNOT00000037115	Golim4-201	ENSRNOG00000024213.6	2:174322871-174413038	1962	5.39895e-05	-21.3038	0.00427626
ENSRNOT00000031231	Disp2-201	ENSRNOG00000026787.5	3:110574416-110589921	6547	5.44036e-05	4.84908	0.00430576
ENSRNOT00000014386	Eral1-201	ENSRNOG00000010673.7	10:65272848-65291064	2033	5.89901e-05	-2.13795	0.0046474
ENSRNOT00000023287	Spsb1-201	ENSRNOG00000017212.7	5:166915329-166926636	1394	6.15259e-05	7.19098	0.00483613
ENSRNOT00000027615	Slc25a42-201	ENSRNOG00000020345.6	16:20962226-20985225	2805	6.16688e-05	25.666	0.00483633
ENSRNOT00000087793	Dyrk3-202	ENSRNOG00000004870.5	13:47906254-47916185	2270	6.30179e-05	8.17552	0.00487919
ENSRNOT00000005811	Usf1-201	ENSRNOG00000004255.4	13:89797799-89805558	1682	6.36176e-05	-45.5322	0.00491826
ENSRNOT00000023428	Snx33-201	ENSRNOG00000017382.4	8:61584655-61595032	3949	6.51564e-05	-2.51785	0.00501471
ENSRNOT00000011665	Cbx1-201	ENSRNOG00000008689.8	10:84669913-84675741	558	6.58985e-05	-24.792	0.00506429
ENSRNOT00000005251	Rgs1-201	ENSRNOG00000003895.7	13:61066152-61070599	1366	6.58828e-05	7.58648	0.00506429
ENSRNOT00000015518	Hnrnph2-201	ENSRNOG00000011661.5	X:105419284-105422861	1575	6.79045e-05	-23.7329	0.00520683
ENSRNOT00000015474	Hspa4l-201	ENSRNOG00000010819.6	2:127625682-127677503	4208	6.8911e-05	4.69242	0.00526449
ENSRNOT00000057475	Dusp11-201	ENSRNOG00000045539.2	4:117617532-117631716	1283	6.96158e-05	2.18777	0.00531048
ENSRNOT00000014348	Noct-201	ENSRNOG00000010799.5	2:140286660-140306869	2609	6.99564e-05	7.79952	0.00533253
ENSRNOT00000002260	Cldnd1-201	ENSRNOG00000001657.5	11:43986385-43992598	2006	7.01887e-05	5.38857	0.00534629
ENSRNOT00000030329	Plagl1-201	ENSRNOG00000025587.4	1:7252348-7259035	4642	7.12434e-05	4.75932	0.00541466
ENSRNOT00000089074	Myl6-203	ENSRNOG00000054140.1	7:2906136-2909179	677	7.30207e-05	2.01389	0.00552941
ENSRNOT00000076976	Gmps-202	ENSRNOG00000051151.2	2:154580557-154590662	667	7.50064e-05	-57.5227	0.00565904
ENSRNOT00000008764	Rbm38-201	ENSRNOG00000006420.6	3:171037956-171050475	1689	7.70396e-05	10.4558	0.0057871
ENSRNOT00000019258	Pdcd7-201	ENSRNOG00000014340.6	8:70860670-70875471	2256	7.91433e-05	-10.0701	0.00590649
ENSRNOT00000020737	Tmem14c-201	ENSRNOG00000015437.7	17:21571517-21577085	1076	8.07456e-05	4.3676	0.0060044
ENSRNOT00000004260	Gprasp2-201	ENSRNOG00000037658.3	X:106360392-106363300	2908	8.15336e-05	4.86686	0.00604994
ENSRNOT00000061580	F2rl1-201	ENSRNOG00000018003.6	2:25222327-25235275	2975	8.17667e-05	38.7573	0.00606287
ENSRNOT00000082331	Zfp326-203	ENSRNOG00000047761.3	14:4998538-5033942	1512	8.44313e-05	2.74474	0.00622875
ENSRNOT00000093365	Ass1-202	ENSRNOG00000008837.6	3:10327416-10375826	1651	8.78983e-05	6.4426	0.0064665
ENSRNOT00000067843	LOC103691744-201	ENSRNOG00000010658.6	2:264266983-264293046	1813	9.02006e-05	3.43128	0.00661063
ENSRNOT00000021797	Hars2-201	ENSRNOG00000016087.5	18:29629183-29638721	3397	9.13671e-05	-4.48583	0.00667419
ENSRNOT00000009687	Fnbp4-201	ENSRNOG00000007241.6	3:79570659-79610454	4369	9.61131e-05	-2.6566	0.0069765
ENSRNOT00000013869	Polr2k-201	ENSRNOG00000010408.7	7:74989222-74992582	517	9.75363e-05	-2.13737	0.00706051
ENSRNOT00000019886	Galt-201	ENSRNOG00000014766.5	5:58144704-58147929	1307	9.94662e-05	7.42695	0.00719463
ENSRNOT00000009342	Eepd1-201	ENSRNOG00000006931.5	8:26652120-26758325	2258	0.000100148	-2.38368	0.00722879
ENSRNOT00000000558	Zbtb22-201	ENSRNOG00000000476.5	20:5476344-5479511	2571	0.000101636	-4.96304	0.00732596
ENSRNOT00000044956	Cdv3-201	ENSRNOG00000010186.7	8:111840026-111850393	1213	0.0001026	9.72681	0.00738513
ENSRNOT00000022309	Got1-201	ENSRNOG00000016356.7	1:263246247-263269762	1998	0.00010304	2.00483	0.0073976
ENSRNOT00000039991	RGD1597339-201	ENSRNOG00000019701.6	1:225085281-225087266	644	0.000104094	-2.05513	0.00745631
ENSRNOT00000085767	Cnih1-202	ENSRNOG00000009811.6	15:23568554-23580395	1441	0.000105129	-5.94232	0.00751481
ENSRNOT00000040472	Grn-202	ENSRNOG00000021031.7	10:90377102-90383205	1931	0.000106813	-19.0113	0.00762514
ENSRNOT00000035992	Zfp958-201	ENSRNOG00000000891.5	12:4737816-4741997	1395	0.000107873	-2.34146	0.00768972
ENSRNOT00000007889	Etv6-201	ENSRNOG00000005984.7	4:167754524-167992168	1915	0.000108241	4.95101	0.00770528
ENSRNOT00000076577	Serf1-202	ENSRNOG00000017945.7	2:30346068-30352099	459	0.000111156	-3.60558	0.00788024
ENSRNOT00000042925	Ids-201	ENSRNOG00000001465.7	8:69449800-69466618	1581	0.000111258	4.35619	0.00788205
ENSRNOT00000013694	Lef1-201	ENSRNOG00000010121.5	2:236233238-236345056	2578	0.000116759	-2.40712	0.00818204
ENSRNOT00000041241	Mt-nd3-201	ENSRNOG00000033615.3	MT:9450-9798	348	0.000117431	-4.31331	0.00822362
ENSRNOT00000050609	Esam-201	ENSRNOG00000033217.4	8:39997874-40008796	1801	0.00011877	15.0966	0.00830613
ENSRNOT00000005311	Col1a1-201	ENSRNOG00000003897.6	10:82745801-82762790	5825	0.000119575	4.46687	0.00835113
ENSRNOT00000087118	Mgrn1-202	ENSRNOG00000003234.7	10:10835903-10881844	1665	0.000120842	-18.1076	0.00839989
ENSRNOT00000005522	Lasp1-201	ENSRNOG00000004132.7	10:85744567-85785133	3499	0.000121872	4.40711	0.0084658
ENSRNOT00000028546	Dbp-201	ENSRNOG00000021027.6	1:101687854-101692846	1702	0.000123741	-4.64304	0.00854389
ENSRNOT00000042126	Bex2-201	ENSRNOG00000032729.3	X:106556837-106558366	775	0.000125434	3.08241	0.00864348
ENSRNOT00000083212	Pdhb-202	ENSRNOG00000007895.5	15:18539209-18546673	1594	0.000125646	21.1679	0.00865234
ENSRNOT00000035805	Ntmt1-201	ENSRNOG00000024809.6	3:9643046-9659630	1251	0.000127066	2.23559	0.0087385
ENSRNOT00000023628	Hspa4-201	ENSRNOG00000016596.3	10:38601623-38642397	4520	0.000127934	2.02925	0.00877481
ENSRNOT00000011333	Rps7-201	ENSRNOG00000008551.7	6:47899557-47904163	585	0.00012846	-71.8808	0.00879919
ENSRNOT00000082857	Selenoh-201	ENSRNOG00000054563.1	3:72070389-72071895	654	0.0001344	-13.0434	0.00912496
ENSRNOT00000002876	Ccng2-201	ENSRNOG00000002089.5	14:16267572-16276068	2471	0.000134451	27.8092	0.00912496
ENSRNOT00000000172	Cdo1-201	ENSRNOG00000000158.5	18:40701983-40716686	1516	0.000134426	-3.0299	0.00912496
ENSRNOT00000004735	B4galt3-201	ENSRNOG00000003551.5	13:89643880-89649906	2010	0.000135492	6.07738	0.00918957
ENSRNOT00000021954	Cotl1-201	ENSRNOG00000016257.7	19:52465086-52499433	1605	0.000136199	2.80654	0.00921932
ENSRNOT00000003891	Septin9-201	ENSRNOG00000002807.8	10:106264433-106348490	1701	0.000136976	-2.01699	0.00925377
ENSRNOT00000077502	Kmt2d-201	ENSRNOG00000061499.1	7:140489491-140546908	18521	0.000137934	3.47072	0.00931242
ENSRNOT00000043461	Pim3-201	ENSRNOG00000029698.5	7:129860326-129863441	1702	0.000143537	8.37008	0.00963403
ENSRNOT00000045993	Ptges-201	ENSRNOG00000006320.7	3:9727407-9738752	1254	0.000144763	3.81756	0.0096974
ENSRNOT00000024765	Caly-201	ENSRNOG00000018337.6	1:212537847-212549477	1412	0.000145693	4.51378	0.00974079
ENSRNOT00000012240	Sec62-201	ENSRNOG00000009057.4	2:116189861-116219750	1818	0.000146557	-3.236	0.0097796
ENSRNOT00000091249	RGD1565355-210	ENSRNOG00000040108.6	4:14039976-14241269	2595	0.000147553	-21.5279	0.0098268
ENSRNOT00000090446	Ap2b1-203	ENSRNOG00000061543.1	10:70520253-70621977	5383	0.00014812	-2.50698	0.0098521
ENSRNOT00000071386	Ranbp2-202	ENSRNOG00000000796.8	20:28027053-28076664	10277	0.000148654	3.94942	0.00988122
ENSRNOT00000005502	RGD1311745-201	ENSRNOG00000004135.6	8:132029620-132032971	775	0.000149113	-2.38715	0.00990025
ENSRNOT00000011714	Tbc1d2-201	ENSRNOG00000023348.7	5:62212981-62260105	4241	0.000150024	-4.76798	0.0099467
ENSRNOT00000025770	Ifit1-201	ENSRNOG00000019050.4	1:252944102-252946170	2068	0.000150147	-4.57833	0.00994847
ENSRNOT00000045306	Ceacam16-201	ENSRNOG00000031391.4	1:80773818-80783898	1615	0.0001525	5.64042	0.0100979
ENSRNOT00000025410	Rpp25-201	ENSRNOG00000018812.3	8:62283335-62284716	1381	0.000152922	-2.65072	0.0101194
ENSRNOT00000065041	Rgs7-201	ENSRNOG00000021984.6	13:93095199-93307199	2607	0.000153837	4.61059	0.0101734
ENSRNOT00000014478	Fbxo3-201	ENSRNOG00000009549.4	3:93968854-94000863	3624	0.000168414	-2.11511	0.0109936
ENSRNOT00000041394	Nr4a2-201	ENSRNOG00000005600.7	3:43111239-43119159	3375	0.000170741	3.5926	0.0111136
ENSRNOT00000026710	Gnai3-201	ENSRNOG00000019465.5	2:210896655-210934749	3208	0.000173287	2.5366	0.011265
ENSRNOT00000045964	R3hdm2-201	ENSRNOG00000007801.7	7:70697049-70805221	3726	0.000178772	-2.64533	0.0115752
ENSRNOT00000035084	Usp38-201	ENSRNOG00000026880.6	19:30668601-30699859	4397	0.00018533	3.64309	0.0119503
ENSRNOT00000082228	Sbk1-201	ENSRNOG00000057696.1	1:197659186-197681006	4088	0.000186848	-3.39532	0.0120177
ENSRNOT00000070897	P4ha1-201	ENSRNOG00000050655.1	20:28920615-28971966	2121	0.000192414	10.0216	0.0123148
ENSRNOT00000022032	Fxyd6-201	ENSRNOG00000016412.5	8:49676539-49703419	1766	0.000193683	2.04096	0.0123807
ENSRNOT00000047113	AABR07017250.1-201	ENSRNOG00000049099.1	15:19429507-19430011	504	0.000198372	-4.15444	0.0126336
ENSRNOT00000020787	Zfp444-201	ENSRNOG00000015517.7	1:71382487-71399751	1501	0.000199161	24.2628	0.0126683
ENSRNOT00000008938	Rps6ka3-201	ENSRNOG00000006632.7	X:37469936-37575624	6557	0.000203113	8.27197	0.0128563
ENSRNOT00000018543	Sh2d4a-201	ENSRNOG00000013541.5	16:23083953-23156962	2867	0.00020682	-2.15609	0.013067
ENSRNOT00000003349	Nid1-201	ENSRNOG00000002461.7	17:90553393-90627101	5699	0.000206961	2.9725	0.0130679
ENSRNOT00000013496	Ldlr-201	ENSRNOG00000009946.7	8:22750335-22774903	4725	0.000208028	2.28017	0.0131272
ENSRNOT00000016423	NEWGENE_621351-201	ENSRNOG00000011292.6	4:31534224-31569151	4464	0.000211625	3.26587	0.0133031
ENSRNOT00000054887	Nkx6-2-201	ENSRNOG00000017748.6	1:211922388-211923929	1267	0.000212907	6.0865	0.0133698
ENSRNOT00000064114	Higd1a-201	ENSRNOG00000019428.7	8:130482492-130491998	1524	0.000213124	-2.46898	0.0133753
ENSRNOT00000008018	Suox-201	ENSRNOG00000005987.5	7:3098244-3102142	2192	0.00021402	28.451	0.0134051
ENSRNOT00000073321	Fasn-201	ENSRNOG00000045636.2	10:109987734-110005901	9139	0.000215514	-3.99759	0.0134762
ENSRNOT00000025294	Slc20a1-201	ENSRNOG00000018567.7	3:121725858-121739173	3092	0.000215748	2.31815	0.0134827
ENSRNOT00000091828	Macf1-204	ENSRNOG00000016047.7	5:141040751-141229781	16077	0.000216976	3.3364	0.013543
ENSRNOT00000022221	Mxd3-202	ENSRNOG00000016539.8	17:9837258-9839452	1497	0.000218107	-7.9955	0.013589
ENSRNOT00000087033	Rbm3-202	ENSRNOG00000005387.6	X:15098946-15102332	1770	0.000221213	-2.57821	0.0137576
ENSRNOT00000019052	Klf2-201	ENSRNOG00000014205.2	16:19223086-19225037	1056	0.00022467	26.6153	0.0139307
ENSRNOT00000014382	Ppif-201	ENSRNOG00000010558.7	16:1979190-1985908	1481	0.000225511	-28.9487	0.0139745
ENSRNOT00000081259	Heca-201	ENSRNOG00000060972.1	1:13036908-13050644	4794	0.000227953	2.72518	0.0141005
ENSRNOT00000016794	Pyroxd1-201	ENSRNOG00000012472.6	4:176565693-176581952	1776	0.000246021	22.6635	0.0150649
ENSRNOT00000010022	Pcnx1-201	ENSRNOG00000007459.6	6:105611455-105743404	7969	0.000247835	3.84274	0.0151311
ENSRNOT00000014980	Cipc-201	ENSRNOG00000011111.6	6:110968060-110990912	3986	0.000250612	-2.51108	0.0152466
ENSRNOT00000045963	Sox11-201	ENSRNOG00000030034.4	6:46629973-46631983	2010	0.000254624	17.7574	0.0154725
ENSRNOT00000029228	Usp24-201	ENSRNOG00000005802.7	5:125896724-126030401	10582	0.000259998	3.2663	0.015762
ENSRNOT00000014489	Tprn-201	ENSRNOG00000010896.5	3:2480231-2487710	2731	0.00025993	2.68115	0.015762
ENSRNOT00000076511	Synm-203	ENSRNOG00000014030.7	1:128692111-128721956	6436	0.000265266	2.38615	0.0160343
ENSRNOT00000073677	AABR07041109.1-201	ENSRNOG00000050465.1	X:119532512-119532965	453	0.000268996	3.37307	0.0162219
ENSRNOT00000017319	Ppdpf-201	ENSRNOG00000012722.5	3:176691328-176692271	660	0.000269579	-4.05565	0.0162286
ENSRNOT00000013575	Lrrc42-201	ENSRNOG00000009983.6	5:126835154-126856292	1697	0.00026946	-2.32558	0.0162286
ENSRNOT00000091505	Ppp1r10-202	ENSRNOG00000059268.2	20:3329676-3344286	4154	0.000270023	2.50855	0.0162364
ENSRNOT00000022603	Calm2-201	ENSRNOG00000016770.5	1:78843079-78851719	1112	0.000276932	-2.82636	0.0165939
ENSRNOT00000090129	Zfp36-201	ENSRNOG00000058388.2	1:85380087-85382569	1812	0.000281092	2.0564	0.0167868
ENSRNOT00000083287	Zfyve27-202	ENSRNOG00000014903.7	1:261415190-261438539	5418	0.000282592	2.29452	0.0168549
ENSRNOT00000048535	LOC100364500-201	ENSRNOG00000048951.2	20:2704375-2707120	1059	0.000283681	4.33601	0.0169101
ENSRNOT00000001913	Pop7-201	ENSRNOG00000025310.4	12:22259712-22260754	843	0.000286785	-2.07504	0.0170565
ENSRNOT00000082699	Adcy6-201	ENSRNOG00000054757.1	7:140270691-140290796	5911	0.000291348	2.70189	0.0172973
ENSRNOT00000003696	Pafah1b1-201	ENSRNOG00000002755.6	10:61457215-61577412	4364	0.000292225	2.41721	0.0173394
ENSRNOT00000006195	Fzd6-201	ENSRNOG00000004660.5	7:77899321-77931029	4202	0.000296391	-3.89614	0.0175262
ENSRNOT00000024128	Sfrp1-201	ENSRNOG00000017783.6	16:73372006-73410777	3892	0.000297297	2.30237	0.0175597
ENSRNOT00000046906	Rlf-201	ENSRNOG00000027921.6	5:140107274-140162642	6068	0.000300437	5.99854	0.0177249
ENSRNOT00000088355	Igfbp3-201	ENSRNOG00000061910.1	14:87457646-87465374	2407	0.000302292	2.57145	0.0178039
ENSRNOT00000015476	Atp1b3-201	ENSRNOG00000011501.5	8:104190031-104221342	1818	0.000308679	2.06437	0.0181231
ENSRNOT00000027418	Srp19-201	ENSRNOG00000020204.7	18:27114821-27121059	757	0.000319402	3.58115	0.0186101
ENSRNOT00000006094	Kcng3-201	ENSRNOG00000004535.6	6:6794807-6842758	1586	0.000324963	11.7498	0.0188915
ENSRNOT00000090057	Dtx3-202	ENSRNOG00000005129.6	7:70476728-70480724	1941	0.000327327	4.32698	0.0189863
ENSRNOT00000001686	Grifin-201	ENSRNOG00000001251.6	12:16170161-16172129	568	0.00033055	-6.50859	0.0191195
ENSRNOT00000084873	Ifi44-202	ENSRNOG00000022218.6	2:256897777-256915563	2922	0.000334844	-6.93182	0.0193246
ENSRNOT00000060499	E2f6-201	ENSRNOG00000004449.7	6:42092466-42108702	2234	0.000334698	-4.31888	0.0193246
ENSRNOT00000043474	Pde10a-201	ENSRNOG00000011310.8	1:52360295-52544450	3402	0.000341203	8.64309	0.0196368
ENSRNOT00000077311	Fabp4-202	ENSRNOG00000010805.7	2:93792663-93797267	563	0.0003474	-16.2457	0.0199712
ENSRNOT00000044081	App-201	ENSRNOG00000006997.8	11:24425812-24641820	2431	0.000350507	2.16363	0.0201051
ENSRNOT00000092028	Rfxap-201	ENSRNOG00000056028.1	2:144003453-144007636	1638	0.000352241	-4.13997	0.0201822
ENSRNOT00000021193	Bcat1-201	ENSRNOG00000015514.7	4:179259309-179307095	2458	0.000353727	5.53184	0.0202561
ENSRNOT00000002425	Senp2-201	ENSRNOG00000001773.7	11:82630435-82664554	1808	0.000354883	2.55664	0.0203111
ENSRNOT00000052292	Hba-a3-201	ENSRNOG00000045989.2	10:15577248-15577977	429	0.000355882	5.26337	0.0203344
ENSRNOT00000011545	AABR07050545.1-201	ENSRNOG00000027694.3	5:169021559-169022145	586	0.000355564	-5.15914	0.0203344
ENSRNOT00000014300	Mbnl2-201	ENSRNOG00000010737.7	15:105640096-105797932	4577	0.00036441	2.73525	0.0207643
ENSRNOT00000016540	Thrsp-201	ENSRNOG00000012404.6	1:162381252-162385575	1232	0.000385342	-7.06572	0.0218008
ENSRNOT00000065895	Myh10-201	ENSRNOG00000002886.6	10:55275410-55406732	7630	0.000385988	3.26335	0.0218254
ENSRNOT00000075196	Erbin-201	ENSRNOG00000047137.3	2:33881023-33920837	5718	0.000388683	2.68571	0.0219418
ENSRNOT00000074449	Tcim-201	ENSRNOG00000047977.1	16:72401886-72403179	1293	0.000394709	2.07222	0.0222213
ENSRNOT00000018511	Spry4-201	ENSRNOG00000013851.3	18:32594957-32609864	4756	0.000400136	3.25357	0.0224901
ENSRNOT00000002869	Rasl11b-201	ENSRNOG00000002097.5	14:36550339-36554580	1835	0.000401038	-2.00094	0.0225163
ENSRNOT00000012975	Aqp7-201	ENSRNOG00000009686.2	5:57358326-57372239	1267	0.000402872	-10.0123	0.022607
ENSRNOT00000014805	Tbpl1-201	ENSRNOG00000011114.7	1:23977687-24002506	1253	0.000403874	2.17329	0.0226509
ENSRNOT00000050142	Cd47-201	ENSRNOG00000001964.7	11:53518725-53575060	909	0.000411309	2.41857	0.0229958
ENSRNOT00000076938	Maged1-204	ENSRNOG00000006756.8	X:63803188-63803915	727	0.000415964	5.45182	0.0232031
ENSRNOT00000028749	Macrod1-201	ENSRNOG00000021174.7	1:222311252-222451484	965	0.000416391	-2.02432	0.0232143
ENSRNOT00000042539	Ppard-201	ENSRNOG00000000503.7	20:7818288-7883482	3262	0.000433173	2.25943	0.0239947
ENSRNOT00000048306	Abcc5-202	ENSRNOG00000029178.6	11:84399416-84428650	669	0.000438562	2.62222	0.0242282
ENSRNOT00000023447	Acly-201	ENSRNOG00000016924.8	10:88392247-88442845	4327	0.000439684	-2.62385	0.0242583
ENSRNOT00000023728	Tmem167b-201	ENSRNOG00000042160.1	2:211348761-211352540	644	0.000449007	2.19891	0.0247392
ENSRNOT00000070994	Rbm15-201	ENSRNOG00000047499.2	2:210081769-210088949	3286	0.000449633	8.45648	0.0247473
ENSRNOT00000025222	Csf1-201	ENSRNOG00000018659.7	2:210522374-210550546	3953	0.000458667	2.90611	0.0251508
ENSRNOT00000079235	Mybpc1-201	ENSRNOG00000056493.1	7:29086155-29171783	3972	0.000459887	-2.38592	0.0251642
ENSRNOT00000025317	Rad9a-201	ENSRNOG00000018729.5	1:219444091-219450451	1179	0.000463818	-3.69534	0.0253525
ENSRNOT00000002738	Alcam-201	ENSRNOG00000001989.6	11:50781126-50985083	2868	0.000471415	5.05348	0.0257269
ENSRNOT00000017254	Rhoc-201	ENSRNOG00000012630.6	2:207271942-207278004	1277	0.000477561	3.11717	0.0260211
ENSRNOT00000087928	Aldoa-202	ENSRNOG00000052802.1	1:198228386-198233215	1340	0.00048112	-2.11902	0.0261737
ENSRNOT00000089990	Fam193b-202	ENSRNOG00000039807.4	17:9595760-9628411	1794	0.00048175	-5.56099	0.0261942
ENSRNOT00000050556	Gpt-201	ENSRNOG00000033915.3	7:117759082-117761931	1740	0.000483168	-3.51814	0.026237
ENSRNOT00000030135	Coq8a-201	ENSRNOG00000043201.2	13:98451636-98478327	2490	0.000484634	-2.70669	0.0262819
ENSRNOT00000073617	Hnrnph3-202	ENSRNOG00000048193.2	20:27212723-27216743	1041	0.000491463	20.5819	0.0264578
ENSRNOT00000049848	Cdkn1b-201	ENSRNOG00000007249.4	4:168689162-168693964	1755	0.000491463	-20.1662	0.0264578
ENSRNOT00000001856	Rasal1-201	ENSRNOG00000001374.6	12:41416217-41448668	3238	0.000494878	-2.54956	0.0266279
ENSRNOT00000007255	Sdc2-201	ENSRNOG00000004936.6	7:71572940-71686044	2949	0.000497477	2.07087	0.0267275
ENSRNOT00000037405	Sez6l2-201	ENSRNOG00000027098.4	1:198383200-198403544	4207	0.00050309	6.35242	0.0269714
ENSRNOT00000019675	Efnb2-201	ENSRNOG00000014648.6	16:86631063-86675049	4244	0.000514346	2.38384	0.0274256
ENSRNOT00000047527	RT1-CE7-201	ENSRNOG00000031090.6	20:4694656-4698718	1568	0.000515103	10.572	0.0274446
ENSRNOT00000036750	Prickle1-201	ENSRNOG00000022772.4	7:134702963-134722215	4485	0.000516889	2.95435	0.0275256
ENSRNOT00000077071	Col12a1-201	ENSRNOG00000058470.1	8:87040798-87158368	10599	0.000518444	4.97593	0.0275658
ENSRNOT00000086435	Cyb5b-202	ENSRNOG00000011142.7	19:39357790-39393189	981	0.000519264	-3.41803	0.0275748
ENSRNOT00000007004	Fbln5-201	ENSRNOG00000050539.2	6:125644803-125723944	2356	0.000521462	2.11838	0.0276693
ENSRNOT00000073550	AABR07034438.1-201	ENSRNOG00000046969.2	11:71634391-71695000	1693	0.000524902	2.40088	0.0277618
ENSRNOT00000068711	Klhl22-201	ENSRNOG00000001878.7	11:87677965-87718805	2562	0.00052755	-2.32802	0.0278637
ENSRNOT00000025880	Dpysl3-201	ENSRNOG00000018992.7	18:37716142-37819097	2538	0.000529648	7.32674	0.0279316
ENSRNOT00000025197	Plk3-201	ENSRNOG00000018484.5	5:135997724-136002900	2389	0.000533729	2.58038	0.0281182
ENSRNOT00000021514	Uqcrc2-201	ENSRNOG00000036742.3	1:190555176-190585734	1824	0.000552961	-25.2826	0.028925
ENSRNOT00000029230	Gltpd2-201	ENSRNOG00000026488.6	10:57125960-57128686	2444	0.000553946	6.05328	0.0289618
ENSRNOT00000075440	Cbx4-201	ENSRNOG00000046207.1	10:108190994-108196217	1446	0.00055981	10.8819	0.0292093
ENSRNOT00000012056	Sorbs3-201	ENSRNOG00000008829.4	15:51859461-51890832	2597	0.000563215	-9.86524	0.0293277
ENSRNOT00000090266	Mtus1-204	ENSRNOG00000010748.8	16:54319376-54383643	1563	0.00058127	6.35498	0.0301313
ENSRNOT00000016768	Plk2-201	ENSRNOG00000011951.4	2:41911130-41916901	2782	0.000598743	2.73355	0.030913
ENSRNOT00000070986	Ubxn6-201	ENSRNOG00000048509.2	9:10995547-11000642	1632	0.000601583	-4.23708	0.0310286
ENSRNOT00000001389	Slc25a30-201	ENSRNOG00000001052.7	15:57813355-57834173	1807	0.000610815	3.55685	0.0314577
ENSRNOT00000075242	NEWGENE_1308196-201	ENSRNOG00000049330.2	9:44491176-44571331	807	0.000629368	-2.74209	0.0322685
ENSRNOT00000061878	Rab5b-201	ENSRNOG00000006130.7	7:3104550-3123297	3250	0.000637133	2.04092	0.0325858
ENSRNOT00000074727	Gba-201	ENSRNOG00000049281.1	2:188516581-188522601	2144	0.000648076	5.70485	0.03308
ENSRNOT00000020822	Rhoq-201	ENSRNOG00000015415.6	6:10533150-10568581	3859	0.000650747	2.58212	0.0332
ENSRNOT00000018233	Pglyrp1-201	ENSRNOG00000013395.3	1:79790704-79796111	851	0.000664685	2.42132	0.0337781
ENSRNOT00000010020	Dok1-201	ENSRNOG00000007412.4	4:113864214-113866674	1728	0.00066889	-3.65904	0.033958
ENSRNOT00000010712	Fos-201	ENSRNOG00000008015.5	6:109300432-109303299	1589	0.00067187	25.1942	0.0340758
ENSRNOT00000029819	Irak2-201	ENSRNOG00000021817.5	4:145594574-145651053	2944	0.000683638	2.38025	0.0345709
ENSRNOT00000013142	Rora-201	ENSRNOG00000027145.6	8:75516903-75607212	1690	0.000692745	3.82619	0.0349801
ENSRNOT00000009122	Synj2bp-201	ENSRNOG00000006399.7	6:105224165-105261549	5811	0.000698099	2.479	0.035216
ENSRNOT00000005311	Col1a1-201	ENSRNOG00000003897.6	10:82745800-82762789	5825	0.000745579	3.29979	0.0371754
ENSRNOT00000044520	AABR07044383.1-201	ENSRNOG00000059770.1	20:3791839-3796275	813	0.000778644	10.361	0.0384351
ENSRNOT00000045063	Clstn1-201	ENSRNOG00000016398.6	5:166533180-166601684	4380	0.00078434	2.06316	0.0386524
ENSRNOT00000072943	LOC100910446-201	ENSRNOG00000048248.2	1:23543425-23556241	1107	0.000811901	7.14464	0.0398105
ENSRNOT00000055254	Procr-201	ENSRNOG00000019330.7	3:151285248-151289595	1470	0.000820036	3.98112	0.0401713
ENSRNOT00000084461	RT1-CE10-203	ENSRNOG00000050210.2	20:154663-157861	1294	0.000835801	8.14779	0.0407697
ENSRNOT00000006401	Ptprr-201	ENSRNOG00000004483.7	7:59039719-59325947	3583	0.000858067	5.1291	0.0416201
ENSRNOT00000073179	LOC100910656-201	ENSRNOG00000047072.2	7:116275816-116284587	333	0.000869606	4.00865	0.042081
ENSRNOT00000016016	LOC100909712-202	ENSRNOG00000011586.7	2:157747541-157759838	2117	0.000878538	2.10521	0.0424338
ENSRNOT00000058837	LOC100909849-201	ENSRNOG00000059244.1	17:62999665-63002650	2985	0.000881016	-3.30724	0.0424959
ENSRNOT00000076191	Slpi-201	ENSRNOG00000046699.3	3:160799980-160802433	856	0.000882962	-6.8597	0.0425596
ENSRNOT00000071648	Ppp2r3b-201	ENSRNOG00000049270.1	14:1469747-1476355	2280	0.000883201	2.71709	0.0425596
ENSRNOT00000065811	Gipc2-201	ENSRNOG00000042152.3	2:257293166-257376756	1250	0.000885634	2.02134	0.0426371
ENSRNOT00000075306	LOC100912571-201	ENSRNOG00000049598.1	11:82886877-82893845	1593	0.000913525	2.44819	0.0437962
ENSRNOT00000078972	RT1-A1-202	ENSRNOG00000038999.4	20:5414447-5418015	1616	0.000916345	4.31355	0.0438503
ENSRNOT00000088795	Actn1-202	ENSRNOG00000056756.1	6:103376556-103470501	2946	0.00091953	-5.51061	0.0439415
ENSRNOT00000039857	Cpne8-201	ENSRNOG00000026128.4	7:131623180-131798236	3380	0.000935112	3.15181	0.0444934
ENSRNOT00000085966	Aldh1l1-202	ENSRNOG00000047023.2	4:123516787-123557501	2709	0.000951913	-2.79631	0.0451664
ENSRNOT00000091147	Fam3a-202	ENSRNOG00000060623.1	X:156319686-156328298	1694	0.000980984	-6.34624	0.045905
ENSRNOT00000089059	Spock2-201	ENSRNOG00000061544.1	20:29655225-29677926	1278	0.000973996	3.03394	0.045905
ENSRNOT00000079866	Ttyh3-201	ENSRNOG00000055583.1	12:16084265-16112664	4473	0.000981862	-16.5965	0.045905
ENSRNOT00000013216	Ift80-201	ENSRNOG00000009808.7	2:165506878-165600748	2879	0.000981862	10.6291	0.045905
ENSRNOT00000036247	LOC103690006-201	ENSRNOG00000022082.6	4:117800627-117814658	1130	0.000990234	-7.47591	0.0460819
ENSRNOT00000081383	Aph1a-202	ENSRNOG00000023816.5	2:198006315-198009314	1194	0.00099536	-3.44059	0.0462605

## Sheet: CT vs. H120
The known differentially expressed mRNA isoforms (P < 0.001, FDR < 0.05 and |FC| > 2) identified in adrenal glands in CT vs. H120.
Transcript ID	Transcript Name	Gene ID	Position	Transcript length (bp*)	P-value	FC	FDR
ENSRNOT00000028315	LOC100360087	ENSRNOG00000020843.6	1:101448345-101449829	552	7.72828e-178	6.12494	7.93462e-173
ENSRNOT00000044711	Ftl1	ENSRNOG00000031506.4	5:152325870-152326778	908	2.72148e-87	7.66057	1.39707e-82
ENSRNOT00000056518	RGD1562747	ENSRNOG00000037352.3	8:69484322-69487951	1038	9.19357e-54	15.3865	2.35976e-49
ENSRNOT00000059255	Sqstm1	ENSRNOG00000003147.8	10:35704729-35716294	1989	6.45227e-53	5.26773	1.32491e-48
ENSRNOT00000028743	Stip1	ENSRNOG00000021164.7	1:222274132-222293148	2101	2.5332e-51	5.22557	4.33473e-47
ENSRNOT00000081355	Tuba1b	ENSRNOG00000053468.1	7:140614751-140617721	1608	8.38296e-48	11.5744	1.22954e-43
ENSRNOT00000071817	LOC100911516	ENSRNOG00000051180.1	9:101388150-101388833	683	2.28309e-46	5.29148	2.93006e-42
ENSRNOT00000039275	Hspb8	ENSRNOG00000022392.3	12:45905370-45920013	1773	9.00792e-45	16.2725	1.0276e-40
ENSRNOT00000023452	Tubb3	ENSRNOG00000017209.6	19:56220754-56229813	1767	7.0502e-44	8.86803	6.5804e-40
ENSRNOT00000083939	Gramd1b	ENSRNOG00000053577.1	8:44165366-44327551	2898	1.49971e-43	4.40829	1.28313e-39
ENSRNOT00000020826	Gem	ENSRNOG00000015160.5	5:25349927-25353661	1626	5.3528e-43	9.05321	4.22747e-39
ENSRNOT00000013159	LOC680121	ENSRNOG00000009920.5	11:13499163-13501263	2100	6.0014e-38	51.7679	3.42313e-34
ENSRNOT00000039795	Dgat1	ENSRNOG00000028711.3	7:117566367-117576737	1747	1.75027e-37	13.7291	9.45788e-34
ENSRNOT00000086310	Hsp90aa1	ENSRNOG00000059714.1	6:135107270-135112775	2758	1.94441e-36	12.9506	9.98164e-33
ENSRNOT00000084642	Ahsa2	ENSRNOG00000052142.1	14:108265206-108273938	1259	5.65621e-36	28.7187	2.52488e-32
ENSRNOT00000004797	Tuba4a	ENSRNOG00000003597.5	9:82415604-82419288	1448	3.14453e-35	11.4024	1.3452e-31
ENSRNOT00000080491	Giot1	ENSRNOG00000051563.1	7:13104480-13108723	1962	7.78574e-34	547.481	2.9606e-30
ENSRNOT00000015525	Nfil3	ENSRNOG00000011668.6	17:12261101-12276315	1960	1.40958e-33	14.0904	5.16863e-30
ENSRNOT00000075425	Ahsa1	ENSRNOG00000048981.1	6:111296416-111304224	1391	8.34094e-31	3.17882	2.76247e-27
ENSRNOT00000031555	Hspb1	ENSRNOG00000023546.5	12:23839398-23841049	879	1.3511e-30	27.622	4.33491e-27
ENSRNOT00000001220	Zbed5	ENSRNOG00000000918.7	12:30308468-30314519	2486	2.76343e-30	3.82642	8.34475e-27
ENSRNOT00000005361	Phlda1	ENSRNOG00000004019.3	7:54247459-54249664	1811	9.95323e-30	7.93198	2.91971e-26
ENSRNOT00000005426	Cwc25	ENSRNOG00000004091.6	10:85684897-85709568	3199	7.93176e-29	18.8617	2.20096e-25
ENSRNOT00000001201	Hsph1	ENSRNOG00000000902.7	12:6322667-6341902	3446	1.08465e-28	22.5566	2.93056e-25
ENSRNOT00000018310	Txndc5	ENSRNOG00000013469.7	17:26925827-26953970	2620	2.35667e-28	3.28449	6.04898e-25
ENSRNOT00000007771	Creb3l1	ENSRNOG00000005413.5	3:80892434-80933283	2640	2.30028e-28	29.6992	6.04898e-25
ENSRNOT00000007466	Fam110c	ENSRNOG00000005660.4	6:49968472-49974728	3111	3.06772e-28	6.47687	7.68201e-25
ENSRNOT00000006754	Rpl7a	ENSRNOG00000049097.1	3:4867232-4869656	798	1.81625e-27	2.76281	4.33661e-24
ENSRNOT00000085226	AC106292.2	ENSRNOG00000059017.1	11:65743891-65745038	1147	7.86261e-27	5.74494	1.83467e-23
ENSRNOT00000041306	AABR07048992.1	ENSRNOG00000032585.5	5:99031012-99033107	2095	9.41068e-27	9.31417	2.1471e-23
ENSRNOT00000014910	Dynll1	ENSRNOG00000011222.5	12:47074199-47076572	652	1.56948e-26	4.34957	3.50302e-23
ENSRNOT00000044551	Rpl7a	ENSRNOG00000047737.1	3:5459159-5461583	798	2.93999e-26	2.72403	5.91859e-23
ENSRNOT00000014821	Gch1	ENSRNOG00000011039.7	15:23934584-23969011	1482	7.0369e-26	8.97591	1.36317e-22
ENSRNOT00000035060	Map1lc3a	ENSRNOG00000025443.4	3:150801288-150802935	969	7.51822e-26	5.30804	1.42944e-22
ENSRNOT00000003787	Ptges3	ENSRNOG00000002642.7	7:2479310-2497013	1659	5.04244e-25	2.13476	9.24477e-22
ENSRNOT00000010061	Dnaja1	ENSRNOG00000007029.3	5:57028466-57039378	1610	1.00684e-24	9.26051	1.81356e-21
ENSRNOT00000008737	Fkbp4	ENSRNOG00000006444.6	4:161748992-161757447	2845	3.60583e-24	3.65446	6.06902e-21
ENSRNOT00000001588	Fam222a	ENSRNOG00000001198.4	12:47748164-47793534	1807	6.02662e-24	9.08184	9.97989e-21
ENSRNOT00000014309	Ptpn1	ENSRNOG00000010574.4	3:164665531-164711848	1711	3.61578e-23	16.6149	5.54078e-20
ENSRNOT00000064983	Iqub	ENSRNOG00000021729.6	4:51482169-51586881	3033	5.8463e-23	102.871	8.82706e-20
ENSRNOT00000009342	Eepd1	ENSRNOG00000006931.5	8:26652120-26758325	2258	1.05681e-22	-8.97044	1.55003e-19
ENSRNOT00000017883	Rbpms	ENSRNOG00000013328.8	16:61954589-62089579	1060	1.83794e-22	2.72546	2.58495e-19
ENSRNOT00000030244	Ldah	ENSRNOG00000021475.6	6:33407247-33491725	2726	2.37259e-22	8.51311	3.2918e-19
ENSRNOT00000012363	Nudt4	ENSRNOG00000009094.4	7:36643915-36660141	2926	3.0085e-22	-160.597	4.11844e-19
ENSRNOT00000020206	Slc25a25	ENSRNOG00000014338.6	3:11442396-11452529	3135	3.0934e-22	5.84018	4.17893e-19
ENSRNOT00000037870	Ccp110	ENSRNOG00000027405.6	1:188420460-188444991	4882	3.22624e-22	30.2841	4.30179e-19
ENSRNOT00000008325	Ndufa5	ENSRNOG00000005698.2	4:51590412-51598771	546	4.75601e-22	9.30182	6.181e-19
ENSRNOT00000001360	Tsc22d1	ENSRNOG00000001030.8	15:58654912-58658153	1672	1.59458e-21	2.78671	1.99653e-18
ENSRNOT00000088687	Lratd1	ENSRNOG00000004084.7	6:39359117-39363367	3238	4.17584e-21	31.8713	5.04393e-18
ENSRNOT00000059187	Dnaaf2	ENSRNOG00000028155.6	6:91481953-91490366	2486	4.8806e-21	18.4159	5.82664e-18
ENSRNOT00000085251	Spsb1	ENSRNOG00000017212.7	5:166913734-166924136	2811	1.36572e-20	4.7519	1.57549e-17
ENSRNOT00000017053	Dnaja4	ENSRNOG00000012106.4	8:59278261-59294003	1827	2.39463e-20	28.894	2.73174e-17
ENSRNOT00000044608	Hspa8	ENSRNOG00000034066.5	8:44990013-44993179	1938	2.61362e-20	23.0893	2.9488e-17
ENSRNOT00000028546	Dbp	ENSRNOG00000021027.6	1:101687854-101692846	1702	6.79537e-20	-18.3075	7.42214e-17
ENSRNOT00000025763	Plat	ENSRNOG00000019018.6	16:74098259-74122889	2542	7.71735e-20	9.67736	8.34042e-17
ENSRNOT00000023628	Hspa4	ENSRNOG00000016596.3	10:38601623-38642397	4520	8.59787e-20	2.50629	9.19525e-17
ENSRNOT00000030569	Chordc1	ENSRNOG00000026643.5	8:17421556-17446165	3211	1.50497e-19	5.58542	1.56076e-16
ENSRNOT00000032974	Ell2	ENSRNOG00000027089.6	2:2456734-2524237	2306	1.96155e-19	9.95178	2.01392e-16
ENSRNOT00000020012	Crem	ENSRNOG00000014900.8	17:57074524-57090888	3365	4.51066e-19	5.6913	4.45297e-16
ENSRNOT00000046102	Vcp	ENSRNOG00000034242.3	5:58426548-58445953	3194	1.22633e-18	2.05795	1.14461e-15
ENSRNOT00000001265	Rpl21	ENSRNOG00000000957.5	12:9996950-9998779	483	1.47768e-18	2.1746	1.36679e-15
ENSRNOT00000047634	Zfand2a	ENSRNOG00000032917.3	12:17252092-17263477	3194	1.92115e-18	35.5507	1.76111e-15
ENSRNOT00000029768	Scx	ENSRNOG00000021812.4	7:117519074-117521093	1134	2.05368e-18	15.8941	1.86594e-15
ENSRNOT00000000535	LOC108348112	ENSRNOG00000000461.7	20:5262119-5269328	3624	4.30376e-18	5.3812	3.84232e-15
ENSRNOT00000068545	Crem	ENSRNOG00000014900.8	17:57031765-57087910	1074	7.02146e-18	9.19793	6.10926e-15
ENSRNOT00000061070	Mapkapk2	ENSRNOG00000004726.7	13:47785160-47831110	2526	7.36031e-18	4.32836	6.35028e-15
ENSRNOT00000039836	Psmd3	ENSRNOG00000028103.5	10:86599219-86611188	2147	9.78249e-18	2.45721	8.30599e-15
ENSRNOT00000093215	AABR07031521.1	ENSRNOG00000062247.1	18:17116551-17118501	1950	1.23164e-17	6.64603	1.02807e-14
ENSRNOT00000025510	Txnl1	ENSRNOG00000018818.6	18:59059374-59086251	1277	1.39969e-17	2.06814	1.15892e-14
ENSRNOT00000071648	Ppp2r3b	ENSRNOG00000049270.1	14:1469747-1476355	2280	1.82258e-17	8.255	1.48513e-14
ENSRNOT00000077356	Gabarapl1	ENSRNOG00000053362.1	4:163293723-163302858	1686	2.41306e-17	2.13174	1.93554e-14
ENSRNOT00000027891	Fosl1	ENSRNOG00000020552.2	1:220826559-220835066	1663	4.27331e-17	59.2868	3.32379e-14
ENSRNOT00000012847	Cct4	ENSRNOG00000009642.3	14:107767391-107780270	2110	4.70062e-17	2.17042	3.60159e-14
ENSRNOT00000034723	Stk24	ENSRNOG00000011511.7	15:106629311-106678918	1260	4.95374e-17	3.7448	3.76741e-14
ENSRNOT00000027834	Fads1	ENSRNOG00000020480.5	1:226234073-226249138	3416	5.48836e-17	-4.03275	4.14331e-14
ENSRNOT00000026408	Agpat2	ENSRNOG00000019466.7	3:4044541-4055806	1107	5.67699e-17	-5.85589	4.25442e-14
ENSRNOT00000017556	Satb1	ENSRNOG00000012942.6	9:2202510-2274629	2976	9.07866e-17	4.0598	6.6579e-14
ENSRNOT00000001579	Sik1	ENSRNOG00000001189.6	20:10668410-10680283	4984	1.23204e-16	7.37527	8.7843e-14
ENSRNOT00000027996	Pbx1	ENSRNOG00000004693.8	13:86391516-86451002	1314	1.45053e-16	4.97358	1.02004e-13
ENSRNOT00000051155	Hdlbp	ENSRNOG00000031479.4	9:100556391-100624638	4386	1.55442e-16	3.16337	1.07833e-13
ENSRNOT00000031717	Map10	ENSRNOG00000028652.4	19:58505810-58508603	2793	1.56861e-16	20.5976	1.08087e-13
ENSRNOT00000087162	Bst2	ENSRNOG00000059900.1	16:19939235-19942343	519	2.08646e-16	2.08085	1.40011e-13
ENSRNOT00000091597	Dbp	ENSRNOG00000021027.6	1:101687895-101692845	1249	3.37175e-16	-6.95746	2.21909e-13
ENSRNOT00000047936	Rpl21	ENSRNOG00000032803.5	X:10430846-10431400	554	3.79315e-16	2.89494	2.48052e-13
ENSRNOT00000026652	Gdf15	ENSRNOG00000019661.3	16:20555394-20557978	912	3.90956e-16	11.0628	2.5245e-13
ENSRNOT00000019556	Fam32a	ENSRNOG00000039528.3	16:19304528-19308842	1996	4.46237e-16	15.8455	2.86344e-13
ENSRNOT00000025925	St13	ENSRNOG00000019070.4	7:122585770-122635731	1662	5.00074e-16	2.30482	3.18898e-13
ENSRNOT00000071625	Pex5	ENSRNOG00000049203.3	4:156983914-157009674	3170	6.8523e-16	4.05558	4.34275e-13
ENSRNOT00000028373	Prpf19	ENSRNOG00000020897.6	1:226947104-226958144	2114	8.19183e-16	-2.31516	5.12838e-13
ENSRNOT00000048781	Sdc3	ENSRNOG00000011927.7	5:148923097-148956404	4841	1.1901e-15	-3.81905	7.31661e-13
ENSRNOT00000013329	Gpr180	ENSRNOG00000009766.7	15:103344475-103368035	1808	1.29555e-15	15.3746	7.91753e-13
ENSRNOT00000012634	Ewsr1	ENSRNOG00000009437.7	14:85322309-85350786	2170	1.47081e-15	2.16535	8.93542e-13
ENSRNOT00000003438	Gpr137b	ENSRNOG00000002480.7	17:90696018-90701515	573	1.51475e-15	15.4275	9.14822e-13
ENSRNOT00000050443	LOC108351137	ENSRNOG00000018630.7	4:157676594-157679962	1002	1.69661e-15	2.27229	1.01866e-12
ENSRNOT00000001307	Bud31	ENSRNOG00000000989.8	12:11232965-11240400	834	2.6096e-15	2.60112	1.53981e-12
ENSRNOT00000047593	AABR07011951.1	ENSRNOG00000034093.4	2:177651240-177653288	2048	3.08588e-15	5.69939	1.80016e-12
ENSRNOT00000081140	Gstt2	ENSRNOG00000052415.1	20:13760809-13764475	1375	3.94837e-15	-3.22102	2.27741e-12
ENSRNOT00000017181	Maff	ENSRNOG00000012886.4	7:120580742-120592095	1941	4.07777e-15	6.8801	2.33891e-12
ENSRNOT00000041033	Eif1	ENSRNOG00000033765.4	10:88227359-88229765	1388	4.63489e-15	2.1871	2.62908e-12
ENSRNOT00000042539	Ppard	ENSRNOG00000000503.7	20:7818288-7883482	3262	5.63475e-15	3.52616	3.17868e-12
ENSRNOT00000013073	Akr1b8	ENSRNOG00000009734.4	4:61772063-61784637	993	6.27181e-15	4.10678	3.51872e-12
ENSRNOT00000082184	Rsrp1	ENSRNOG00000017309.7	5:153260981-153264593	2761	6.82e-15	2.36414	3.80548e-12
ENSRNOT00000001227	Cct6a	ENSRNOG00000000923.8	12:30491415-30501860	2200	8.37439e-15	2.04359	4.64756e-12
ENSRNOT00000083017	Herc4	ENSRNOG00000061040.1	20:26755910-26830931	3834	1.20237e-14	3.03489	6.42957e-12
ENSRNOT00000026559	Vegfa	ENSRNOG00000019598.8	9:17340340-17355681	3474	1.3455e-14	2.11698	7.15763e-12
ENSRNOT00000000525	RT1-Bb	ENSRNOG00000032708.5	20:4043740-4049711	1844	1.46237e-14	11.1338	7.73924e-12
ENSRNOT00000022983	Serpinh1	ENSRNOG00000016831.6	1:164301009-164308317	2052	1.56623e-14	2.5008	8.22831e-12
ENSRNOT00000083750	Selenof	ENSRNOG00000055257.1	2:250600822-250633897	1512	1.6433e-14	-25.839	8.56435e-12
ENSRNOT00000028779	Hist1h2bq	ENSRNOG00000021198.4	17:43679924-43689311	949	1.85037e-14	2.58927	9.5466e-12
ENSRNOT00000044241	AABR07055776.1	ENSRNOG00000031216.3	7:9974624-9976367	1743	2.52137e-14	5.02266	1.28791e-11
ENSRNOT00000018682	Cbln2	ENSRNOG00000013654.4	18:83777664-83782930	2348	2.68731e-14	11.4499	1.36587e-11
ENSRNOT00000065304	Atf4	ENSRNOG00000017801.7	7:121480722-121482772	1401	3.47759e-14	3.42068	1.75884e-11
ENSRNOT00000028115	Bod1	ENSRNOG00000020717.4	10:16259727-16266061	1459	7.00408e-14	2.89793	3.52504e-11
ENSRNOT00000024798	Uts2	ENSRNOG00000018393.4	5:168078747-168084145	539	9.33291e-14	39.8601	4.60678e-11
ENSRNOT00000000603	Rpl10a	ENSRNOG00000000505.7	20:7908303-7910867	715	1.15773e-13	2.13205	5.66019e-11
ENSRNOT00000016846	Man1b1	ENSRNOG00000012559.6	3:2547985-2569049	3677	1.66968e-13	3.06731	7.9733e-11
ENSRNOT00000085448	Hdlbp	ENSRNOG00000031479.4	9:100554562-100588951	6139	1.87349e-13	-168.259	8.85031e-11
ENSRNOT00000001099	Ier3	ENSRNOG00000000827.6	20:3438797-3440002	1098	2.04587e-13	3.41312	9.54772e-11
ENSRNOT00000014028	LOC103690024	ENSRNOG00000010407.6	4:156403015-156426760	2945	2.13088e-13	3.39751	9.89942e-11
ENSRNOT00000011589	Arhgap32	ENSRNOG00000008709.6	8:33239138-33392305	9935	3.15973e-13	22.7364	1.42912e-10
ENSRNOT00000075397	Scd2	ENSRNOG00000046005.1	1:264059373-264072433	5046	3.31201e-13	-2.82643	1.49142e-10
ENSRNOT00000027616	Bag3	ENSRNOG00000020298.6	1:199941160-199965191	2425	4.08331e-13	32.2911	1.82275e-10
ENSRNOT00000020192	Hagh	ENSRNOG00000014743.5	10:14216154-14230515	1184	4.37435e-13	4.38728	1.94422e-10
ENSRNOT00000000824	Hps4	ENSRNOG00000000661.5	12:50285293-50313976	2343	4.79935e-13	8.12945	2.12392e-10
ENSRNOT00000010811	Ndrg1	ENSRNOG00000007393.7	7:107734322-107775712	2890	6.88715e-13	5.34629	3.00895e-10
ENSRNOT00000026258	Tef	ENSRNOG00000019383.7	7:123043502-123058604	4163	1.41004e-12	-5.17535	5.9984e-10
ENSRNOT00000006502	Dyrk3	ENSRNOG00000004870.5	13:47906230-47916877	2108	1.41386e-12	5.16036	5.9984e-10
ENSRNOT00000003282	Gpc4	ENSRNOG00000002413.6	X:139354154-139464798	2831	1.50914e-12	2.29012	6.37627e-10
ENSRNOT00000086232	Alas1	ENSRNOG00000056596.1	8:114927788-114940177	1969	2.64976e-12	2.9403	1.08387e-09
ENSRNOT00000049540	LOC103690108	ENSRNOG00000047706.3	20:3791406-3793985	1047	2.76593e-12	212.427	1.11802e-09
ENSRNOT00000014458	Pithd1	ENSRNOG00000010873.7	5:154322550-154332940	1416	2.8226e-12	3.80592	1.13645e-09
ENSRNOT00000091814	Rorb	ENSRNOG00000013413.7	1:234252756-234435839	2366	5.36967e-12	31.8351	2.0571e-09
ENSRNOT00000090211	Nsfl1c	ENSRNOG00000008604.7	3:146981983-147005439	1255	6.53973e-12	17.8551	2.49604e-09
ENSRNOT00000020815	Slc27a3	ENSRNOG00000015421.6	2:189760746-189765415	2274	1.06049e-11	-2.3079	3.88858e-09
ENSRNOT00000001205	Medag	ENSRNOG00000000906.7	12:6711746-6740714	2221	1.12078e-11	-6.28508	4.09503e-09
ENSRNOT00000017555	Nop53	ENSRNOG00000013023.5	1:77836195-77844189	1705	1.19124e-11	2.82414	4.27638e-09
ENSRNOT00000000831	Tpst2	ENSRNOG00000000664.4	12:50343085-50383496	1744	1.27225e-11	11.6862	4.53548e-09
ENSRNOT00000010203	Vom2r53	ENSRNOG00000007730.3	7:13151591-13184257	2790	1.62361e-11	106.806	5.72839e-09
ENSRNOT00000010171	Nr4a1	ENSRNOG00000007607.4	7:142912315-142920216	2484	1.92624e-11	2.31658	6.72678e-09
ENSRNOT00000082097	Cdv3	ENSRNOG00000010186.7	8:111839090-111850075	1131	2.08789e-11	-12.4832	7.25648e-09
ENSRNOT00000010455	Chtop	ENSRNOG00000012760.8	2:189888832-189899103	1758	2.22686e-11	2.56786	7.69805e-09
ENSRNOT00000003349	Nid1	ENSRNOG00000002461.7	17:90553393-90627101	5699	2.30705e-11	3.6483	7.94849e-09
ENSRNOT00000088555	RGD1564664	ENSRNOG00000055564.1	3:82854776-82856171	1395	2.44389e-11	6.32974	8.3638e-09
ENSRNOT00000064910	Rnf10	ENSRNOG00000001172.7	12:47103313-47138128	4100	2.44319e-11	2.49308	8.3638e-09
ENSRNOT00000064596	Eloa	ENSRNOG00000010902.6	5:154347390-154363329	3491	2.49435e-11	16.4023	8.50813e-09
ENSRNOT00000071153	Prkar1a	ENSRNOG00000049876.1	10:97940704-97957336	1434	3.02216e-11	2.59184	1.01733e-08
ENSRNOT00000084202	Sfpq	ENSRNOG00000058461.1	5:145079802-145088498	2453	3.07737e-11	3.78469	1.03253e-08
ENSRNOT00000086717	Crat	ENSRNOG00000018145.7	3:8968615-8981362	1881	3.11454e-11	-12.5269	1.0416e-08
ENSRNOT00000034334	Lrrc58	ENSRNOG00000027151.5	11:65747035-65759581	1377	4.30649e-11	6.65916	1.4309e-08
ENSRNOT00000005522	Lasp1	ENSRNOG00000004132.7	10:85744567-85785133	3499	4.57263e-11	5.08483	1.51255e-08
ENSRNOT00000024310	Ahcy	ENSRNOG00000017777.3	3:150587832-150603082	2054	4.99619e-11	2.64348	1.6441e-08
ENSRNOT00000061619	Nifk	ENSRNOG00000025701.5	13:34267470-34277530	1721	5.80039e-11	2.45698	1.89658e-08
ENSRNOT00000074874	Dr1	ENSRNOG00000048308.2	14:2463642-2474780	2792	6.86459e-11	-7.9007	2.21631e-08
ENSRNOT00000008969	Laptm4b	ENSRNOG00000006766.6	7:72924798-72968101	1845	7.90676e-11	2.07524	2.54479e-08
ENSRNOT00000086177	LOC100911576	ENSRNOG00000050800.2	14:88549946-88574203	1603	8.6695e-11	2.3637	2.75572e-08
ENSRNOT00000077221	Lmo4	ENSRNOG00000009205.6	2:250218640-250241590	1540	8.66539e-11	3.32224	2.75572e-08
ENSRNOT00000011054	Bsdc1	ENSRNOG00000008338.7	5:147661617-147689759	2680	1.26707e-10	2.44616	3.95411e-08
ENSRNOT00000002809	Igfbp7	ENSRNOG00000002050.4	14:33010299-33070190	1102	1.32055e-10	2.31106	4.10851e-08
ENSRNOT00000018252	Gadd45g	ENSRNOG00000013090.7	17:13391466-13393243	1090	1.39648e-10	6.90808	4.31882e-08
ENSRNOT00000039186	Mettl9	ENSRNOG00000025940.3	1:190964884-191009926	1456	1.48729e-10	-84.005	4.57185e-08
ENSRNOT00000075555	Rmnd5b	ENSRNOG00000047396.2	10:34979922-34990943	1854	1.63629e-10	-10.1579	4.99428e-08
ENSRNOT00000009870	Maged1	ENSRNOG00000006756.8	X:63803188-63809861	2822	1.68808e-10	2.84836	5.12766e-08
ENSRNOT00000064276	Scarb1	ENSRNOG00000000981.8	12:36694959-36761455	2483	1.76479e-10	3.66919	5.34486e-08
ENSRNOT00000082228	Sbk1	ENSRNOG00000057696.1	1:197659186-197681006	4088	1.89321e-10	-4.6261	5.68352e-08
ENSRNOT00000019767	Fahd1	ENSRNOG00000014727.6	10:14214518-14215957	1439	2.42669e-10	3.15291	7.2008e-08
ENSRNOT00000026426	Smim3	ENSRNOG00000019536.5	18:55744809-55771730	1701	2.8336e-10	2.20145	8.33597e-08
ENSRNOT00000028885	Slc23a2	ENSRNOG00000021262.5	3:124632491-124724252	6297	3.08322e-10	3.03554	9.01864e-08
ENSRNOT00000073179	LOC100910656	ENSRNOG00000047072.2	7:116275816-116284587	333	3.23198e-10	6.37418	9.38036e-08
ENSRNOT00000080990	Emd	ENSRNOG00000058882.1	X:156452817-156456035	1476	3.39578e-10	3.57824	9.7934e-08
ENSRNOT00000003343	Ifi47	ENSRNOG00000002470.8	10:34277992-34285623	1874	3.6653e-10	-2.79924	1.04824e-07
ENSRNOT00000079279	Ppm1b	ENSRNOG00000030667.6	6:8220227-8271054	2569	4.11064e-10	3.44429	1.16585e-07
ENSRNOT00000090268	Sltm	ENSRNOG00000054446.1	8:76977821-77022837	3732	4.45441e-10	2.52858	1.25641e-07
ENSRNOT00000082076	Mat2b	ENSRNOG00000003177.7	10:25832071-25847994	1885	4.5389e-10	-4.26067	1.27674e-07
ENSRNOT00000023613	Gmpr	ENSRNOG00000017250.4	17:19543274-19580929	1432	4.87657e-10	3.53848	1.36424e-07
ENSRNOT00000085692	Ubc	ENSRNOG00000057823.1	12:36638456-36642734	2545	5.75611e-10	182.876	1.58866e-07
ENSRNOT00000010433	Plod1	ENSRNOG00000007763.7	5:164720586-164747083	2949	5.85607e-10	2.66664	1.6076e-07
ENSRNOT00000022309	Got1	ENSRNOG00000016356.7	1:263246247-263269762	1998	9.10865e-10	2.32423	2.42905e-07
ENSRNOT00000083156	Tuba1a	ENSRNOG00000060728.1	7:140637286-140640953	1617	1.02628e-09	7.64932	2.71567e-07
ENSRNOT00000010185	Arl6ip5	ENSRNOG00000006818.6	4:129574263-129598915	1242	1.06662e-09	-4.83363	2.80796e-07
ENSRNOT00000065893	Fbrsl1	ENSRNOG00000030721.6	12:52359309-52377475	1800	1.1847e-09	8.24996	3.095e-07
ENSRNOT00000048851	Ppp1cc	ENSRNOG00000001269.6	12:39864301-39882030	1493	1.24393e-09	9.4668	3.22511e-07
ENSRNOT00000085026	Ddit4	ENSRNOG00000057078.1	20:29509288-29511382	1720	1.30534e-09	15.4705	3.3758e-07
ENSRNOT00000078600	LOC103690068	ENSRNOG00000056651.1	1:88192369-88193346	547	1.41268e-09	11.3197	3.626e-07
ENSRNOT00000035992	Zfp958	ENSRNOG00000000891.5	12:4737816-4741997	1395	1.41101e-09	-4.30429	3.626e-07
ENSRNOT00000042736	LOC102555453	ENSRNOG00000028993.1	X:1345683-1346181	498	1.44829e-09	7.835	3.70813e-07
ENSRNOT00000019192	Hmox1	ENSRNOG00000014117.7	19:14508615-14515456	1566	1.51306e-09	5.97257	3.85474e-07
ENSRNOT00000039377	Riok3	ENSRNOG00000023376.4	18:3565165-3590739	3843	1.7643e-09	2.25131	4.43972e-07
ENSRNOT00000065211	Hdgf	ENSRNOG00000042261.3	2:187281999-187284281	1260	1.85746e-09	-4.89711	4.65136e-07
ENSRNOT00000050213	Ybx1-ps3	ENSRNOG00000032902.3	10:40380387-40381886	1499	2.01944e-09	2.32417	4.98404e-07
ENSRNOT00000059666	Naa50	ENSRNOG00000039017.5	11:61510993-61530830	1837	2.05077e-09	3.68578	5.04059e-07
ENSRNOT00000078972	RT1-A1	ENSRNOG00000038999.4	20:5414447-5418015	1616	2.05759e-09	5.25651	5.04184e-07
ENSRNOT00000074071	Pja1	ENSRNOG00000047339.3	X:69213644-69218543	2112	2.21426e-09	14.3088	5.41282e-07
ENSRNOT00000022786	Dolk	ENSRNOG00000016989.3	3:8850153-8852192	2039	2.22967e-09	-2.98691	5.43754e-07
ENSRNOT00000048306	Abcc5	ENSRNOG00000029178.6	11:84399416-84428650	669	2.43238e-09	4.13575	5.90384e-07
ENSRNOT00000004713	Adamts4	ENSRNOG00000003538.7	13:89622631-89634419	5637	2.52169e-09	87.5775	6.10619e-07
ENSRNOT00000040038	AY172581.9	ENSRNOG00000030478.3	MT:67-1025	958	2.63011e-09	2.31027	6.32398e-07
ENSRNOT00000043474	Pde10a	ENSRNOG00000011310.8	1:52360295-52544450	3402	2.77615e-09	16.9935	6.62854e-07
ENSRNOT00000083677	Zfp36l1	ENSRNOG00000058646.1	6:103308044-103313074	2728	3.02386e-09	2.20419	7.15346e-07
ENSRNOT00000020204	Crem	ENSRNOG00000014900.8	17:57040022-57088502	1347	3.04067e-09	6.67023	7.16454e-07
ENSRNOT00000085279	Ephx1	ENSRNOG00000003515.6	13:99271365-99300579	1755	3.22851e-09	-2.72773	7.56783e-07
ENSRNOT00000091499	Pelo	ENSRNOG00000061128.1	2:47266737-47268625	1598	3.33874e-09	4.20011	7.80839e-07
ENSRNOT00000011347	Amotl2	ENSRNOG00000008487.7	8:111210810-111226193	4122	3.65934e-09	4.66378	8.4809e-07
ENSRNOT00000076924	Etnk2	ENSRNOG00000028368.7	13:50481162-50499140	2199	3.78815e-09	-2.53831	8.75967e-07
ENSRNOT00000045628	Tf	ENSRNOG00000030625.6	8:111694565-111721303	2324	4.04578e-09	-62.519	9.29262e-07
ENSRNOT00000024695	Bok	ENSRNOG00000018214.6	9:100829551-100840504	1400	4.28354e-09	2.63574	9.79491e-07
ENSRNOT00000077185	P4ha2	ENSRNOG00000033663.5	10:39435282-39464188	2310	4.65341e-09	2.78498	1.05235e-06
ENSRNOT00000089306	RT1-A1	ENSRNOG00000038999.4	20:5351604-5418011	1542	4.89463e-09	8.96185	1.09723e-06
ENSRNOT00000022113	Ttr	ENSRNOG00000016275.4	18:15532962-15540177	701	4.88635e-09	6.26911	1.09723e-06
ENSRNOT00000011610	Oser1	ENSRNOG00000008297.5	3:159784127-159802952	1621	5.42903e-09	2.51336	1.20911e-06
ENSRNOT00000044520	AABR07044383.1	ENSRNOG00000059770.1	20:3791839-3796275	813	5.53484e-09	23.4286	1.23001e-06
ENSRNOT00000018543	Sh2d4a	ENSRNOG00000013541.5	16:23083953-23156962	2867	6.1959e-09	-3.38426	1.35347e-06
ENSRNOT00000013997	Psmc5	ENSRNOG00000010038.6	10:94445876-94451811	1288	7.74836e-09	2.27915	1.67979e-06
ENSRNOT00000013450	Azi2	ENSRNOG00000010096.7	8:126411828-126434579	1996	8.19036e-09	2.73235	1.7666e-06
ENSRNOT00000025410	Rpp25	ENSRNOG00000018812.3	8:62283335-62284716	1381	8.5028e-09	-5.42838	1.82632e-06
ENSRNOT00000047717	Impdh2	ENSRNOG00000031965.4	8:117347028-117351610	1639	8.84614e-09	2.12835	1.88897e-06
ENSRNOT00000022348	Rps23	ENSRNOG00000016580.6	2:19823233-19824804	510	9.3951e-09	-223.125	2.00124e-06
ENSRNOT00000013184	Dync1i1	ENSRNOG00000009700.5	4:30807878-31121090	2643	9.80674e-09	2.5431	2.08029e-06
ENSRNOT00000018133	Depp1	ENSRNOG00000023465.4	4:148782478-148784562	1265	1.10392e-08	4.32587	2.32253e-06
ENSRNOT00000019886	Galt	ENSRNOG00000014766.5	5:58144704-58147929	1307	1.14951e-08	8.01996	2.39879e-06
ENSRNOT00000003164	Msi2	ENSRNOG00000025338.7	10:75681392-76039964	984	1.24024e-08	2.61668	2.57764e-06
ENSRNOT00000048752	Brd8	ENSRNOG00000020340.7	18:27398939-27419281	3288	1.27998e-08	3.15652	2.6495e-06
ENSRNOT00000025592	Bcas2	ENSRNOG00000018783.6	2:205662587-205670511	1096	1.36018e-08	-2.79769	2.793e-06
ENSRNOT00000022128	Cx3cl1	ENSRNOG00000016326.5	19:10644243-10653800	3127	1.41442e-08	-3.64588	2.89858e-06
ENSRNOT00000056199	Shisa5	ENSRNOG00000020667.7	8:117793288-117795919	1454	1.43232e-08	3.1275	2.91779e-06
ENSRNOT00000009951	Hoxb9	ENSRNOG00000007573.4	10:84119883-84123390	937	1.52187e-08	3.22902	3.08796e-06
ENSRNOT00000001593	Cstb	ENSRNOG00000001201.4	20:10966330-10968432	640	1.68042e-08	2.40657	3.39623e-06
ENSRNOT00000091505	Ppp1r10	ENSRNOG00000059268.2	20:3329676-3344286	4154	2.07561e-08	3.14896	4.1299e-06
ENSRNOT00000041753	AC105662.1	ENSRNOG00000030447.5	5:173148883-173149276	393	2.1995e-08	9.50592	4.34274e-06
ENSRNOT00000059571	Npas2	ENSRNOG00000013408.5	9:45901740-46081880	4273	2.48449e-08	7.59419	4.88664e-06
ENSRNOT00000074586	Cebpd	ENSRNOG00000050869.2	11:89008007-89009146	1139	2.67201e-08	3.22905	5.21551e-06
ENSRNOT00000025770	Ifit1	ENSRNOG00000019050.4	1:252944102-252946170	2068	2.9728e-08	-15.4798	5.75882e-06
ENSRNOT00000044788	Ppp1r15a	ENSRNOG00000020938.7	1:101511900-101514974	2027	3.17998e-08	2.6799	6.12549e-06
ENSRNOT00000031586	Pck1	ENSRNOG00000028616.6	3:171213935-171219871	2621	3.2661e-08	4.39762	6.26503e-06
ENSRNOT00000001564	Ndufv3	ENSRNOG00000001182.7	20:10265805-10275304	1562	3.27073e-08	-2.12676	6.26503e-06
ENSRNOT00000000702	Anapc16	ENSRNOG00000000576.6	20:29544628-29558321	1168	3.42541e-08	2.56507	6.52481e-06
ENSRNOT00000067780	Junb	ENSRNOG00000042838.3	19:26092973-26094756	1783	3.51914e-08	4.20628	6.67856e-06
ENSRNOT00000061580	F2rl1	ENSRNOG00000018003.6	2:25222327-25235275	2975	3.64688e-08	82.3499	6.88282e-06
ENSRNOT00000026871	Gadd45b	ENSRNOG00000019822.4	7:11646268-11648322	1300	3.805e-08	3.38757	7.15493e-06
ENSRNOT00000089327	Lmbr1	ENSRNOG00000059589.1	4:2116093-2201749	2504	4.03438e-08	9.47403	7.53109e-06
ENSRNOT00000008785	Wdyhv1	ENSRNOG00000006700.7	7:97957021-97977135	1409	4.11173e-08	4.90501	7.66156e-06
ENSRNOT00000032918	Irs2	ENSRNOG00000023509.6	16:83824429-83848684	6501	4.34601e-08	3.00928	8.0688e-06
ENSRNOT00000016237	Ptp4a1	ENSRNOG00000011771.3	9:37223728-37231291	2456	4.46114e-08	3.51312	8.25271e-06
ENSRNOT00000004308	Sqstm1	ENSRNOG00000003147.8	10:35712614-35716260	702	4.52036e-08	4.81394	8.34721e-06
ENSRNOT00000001403	Rilpl2	ENSRNOG00000001061.6	12:37544917-37556453	1289	4.53066e-08	-2.10016	8.35122e-06
ENSRNOT00000044372	Tceal1	ENSRNOG00000002387.5	X:107370430-107372338	1173	4.84398e-08	-2.53088	8.84931e-06
ENSRNOT00000011579	Pex2	ENSRNOG00000008748.4	2:98252924-98269184	1623	5.19783e-08	-2.63767	9.46208e-06
ENSRNOT00000024583	Zfand5	ENSRNOG00000018107.5	1:238843337-238852566	2147	5.32658e-08	2.05748	9.67928e-06
ENSRNOT00000003696	Pafah1b1	ENSRNOG00000002755.6	10:61457215-61577412	4364	5.44481e-08	2.8704	9.84463e-06
ENSRNOT00000089243	Grb14	ENSRNOG00000052498.1	3:50937668-51054378	1617	5.68175e-08	-3.39112	1.01805e-05
ENSRNOT00000077528	Kdm5c	ENSRNOG00000057706.1	X:22342307-22348627	3118	6.11113e-08	2.83738	1.08364e-05
ENSRNOT00000024264	Nars1	ENSRNOG00000017852.8	18:59986359-60002569	2605	6.16477e-08	15.6506	1.09127e-05
ENSRNOT00000087611	Strbp	ENSRNOG00000010150.7	3:21828297-21904267	2311	7.00189e-08	4.58714	1.22356e-05
ENSRNOT00000014478	Fbxo3	ENSRNOG00000009549.4	3:93968854-94000863	3624	7.16409e-08	-3.22008	1.24246e-05
ENSRNOT00000022253	Fgfr2	ENSRNOG00000016374.8	1:200590952-200696928	4624	7.85451e-08	3.02267	1.35306e-05
ENSRNOT00000070897	P4ha1	ENSRNOG00000050655.1	20:28920615-28971966	2121	7.93064e-08	8.81555	1.35933e-05
ENSRNOT00000010151	Il23r	ENSRNOG00000007544.5	4:98203957-98305173	1875	8.50502e-08	6.77814	1.44571e-05
ENSRNOT00000046659	Frmd5	ENSRNOG00000016189.8	3:113483268-113525864	1458	9.03261e-08	2.76049	1.53033e-05
ENSRNOT00000081530	Gpr137b	ENSRNOG00000002480.7	17:90670871-90746804	2341	1.00708e-07	15.3177	1.68674e-05
ENSRNOT00000016885	Eif4ebp1	ENSRNOG00000012582.5	16:68954874-68968248	831	1.02396e-07	-2.46963	1.71221e-05
ENSRNOT00000086571	Grsf1	ENSRNOG00000003392.7	14:21041620-21056452	2599	1.04037e-07	-4.64208	1.73682e-05
ENSRNOT00000012767	Zrsr1	ENSRNOG00000009639.5	14:107750161-107751892	1731	1.07702e-07	3.45289	1.78639e-05
ENSRNOT00000044163	Vegfa	ENSRNOG00000019598.8	9:17340340-17355681	3342	1.08643e-07	2.30247	1.7991e-05
ENSRNOT00000013276	Swap70	ENSRNOG00000009910.6	1:174862697-174924078	3876	1.10386e-07	30.6934	1.82208e-05
ENSRNOT00000022331	Fgfr2	ENSRNOG00000016374.8	1:200590952-200696928	4282	1.12413e-07	4.57557	1.85256e-05
ENSRNOT00000074938	Nrbp1	ENSRNOG00000050570.1	6:26486828-26497328	2130	1.20594e-07	-2.45108	1.97471e-05
ENSRNOT00000091941	Adrm1	ENSRNOG00000055984.1	3:175548173-175552947	1441	1.22405e-07	2.15501	1.99799e-05
ENSRNOT00000091444	Hao2	ENSRNOG00000019470.6	2:200793570-200808501	1563	1.23495e-07	3.89629	2.01257e-05
ENSRNOT00000030135	Coq8a	ENSRNOG00000043201.2	13:98451636-98478327	2490	1.28326e-07	-2.57995	2.08799e-05
ENSRNOT00000017561	Chtop	ENSRNOG00000012760.8	2:189887856-189899325	2818	1.31819e-07	2.30364	2.13132e-05
ENSRNOT00000081813	Prpf8	ENSRNOG00000003495.7	10:63635218-63658361	7470	1.4022e-07	-38.2619	2.25648e-05
ENSRNOT00000028680	Nomo1	ENSRNOG00000021118.5	1:102017262-102068870	4201	1.4263e-07	2.33564	2.28453e-05
ENSRNOT00000089599	Ap3b1	ENSRNOG00000010624.6	2:24024790-24226224	4680	1.47564e-07	2.32816	2.35621e-05
ENSRNOT00000063795	Sec22a	ENSRNOG00000043069.2	11:68633159-68686548	1635	1.5572e-07	-2.38747	2.47489e-05
ENSRNOT00000001123	Csnk2b	ENSRNOG00000000847.8	20:5108694-5112984	928	1.56122e-07	2.20499	2.47743e-05
ENSRNOT00000049695	AABR07053166.1	ENSRNOG00000029262.4	3:94832875-94833406	531	1.72545e-07	2.11275	2.72123e-05
ENSRNOT00000080351	Cenpb	ENSRNOG00000057284.1	3:123721485-123723524	2039	1.79034e-07	-2.33749	2.81061e-05
ENSRNOT00000011474	Snx11	ENSRNOG00000008642.7	10:84628423-84639105	2496	1.8038e-07	-3.48165	2.82311e-05
ENSRNOT00000081178	Ssbp1	ENSRNOG00000012100.6	4:68634928-68645172	726	2.09875e-07	-2.69938	3.26482e-05
ENSRNOT00000086293	LOC103690108	ENSRNOG00000047706.3	20:3791839-3794027	847	2.10202e-07	3.0115	3.26496e-05
ENSRNOT00000028591	Kcnj14	ENSRNOG00000021056.6	1:101805530-101809544	2729	2.14916e-07	7.0797	3.33314e-05
ENSRNOT00000013142	Rora	ENSRNOG00000027145.6	8:75516903-75607212	1690	2.22069e-07	6.13776	3.43807e-05
ENSRNOT00000013496	Ldlr	ENSRNOG00000009946.7	8:22750335-22774903	4725	2.26548e-07	2.06929	3.4977e-05
ENSRNOT00000004248	Trpv2	ENSRNOG00000003104.7	10:48903539-48925030	2798	2.35571e-07	-4.1199	3.61526e-05
ENSRNOT00000064305	Pvr	ENSRNOG00000019202.8	1:80820049-80835701	2164	2.51102e-07	6.40352	3.83071e-05
ENSRNOT00000085760	Abtb2	ENSRNOG00000008510.6	3:93495105-93647721	3075	2.5275e-07	7.38107	3.84274e-05
ENSRNOT00000010303	Kctd6	ENSRNOG00000007817.5	15:18484509-18493366	1551	2.53014e-07	4.09265	3.84274e-05
ENSRNOT00000023287	Spsb1	ENSRNOG00000017212.7	5:166915329-166926636	1394	2.61976e-07	6.05748	3.97298e-05
ENSRNOT00000022221	Mxd3	ENSRNOG00000016539.8	17:9837258-9839452	1497	2.78201e-07	3.58632	4.20043e-05
ENSRNOT00000022713	Paqr7	ENSRNOG00000022054.2	5:152708774-152720229	2233	3.07135e-07	-3.02508	4.61017e-05
ENSRNOT00000073986	Plcxd1	ENSRNOG00000049866.2	12:52641221-52644260	960	3.18441e-07	24.7515	4.76594e-05
ENSRNOT00000068433	Myo1b	ENSRNOG00000048152.2	9:54558201-54766054	3609	3.21355e-07	2.84617	4.79556e-05
ENSRNOT00000050609	Esam	ENSRNOG00000033217.4	8:39997874-40008796	1801	3.38793e-07	18.1618	5.04846e-05
ENSRNOT00000081240	RT1-A1	ENSRNOG00000038999.4	20:5351620-5418013	1561	3.51547e-07	3.64619	5.21579e-05
ENSRNOT00000010536	Pqbp1	ENSRNOG00000007766.6	X:15348137-15453130	1124	4.11268e-07	-2.17712	6.01494e-05
ENSRNOT00000006355	Arf6	ENSRNOG00000004791.5	6:91697108-91698255	1147	4.20859e-07	2.90794	6.14645e-05
ENSRNOT00000085214	Eprs	ENSRNOG00000002393.7	13:103300931-103371577	4801	4.3e-07	5.21383	6.25328e-05
ENSRNOT00000090312	Ddx39a	ENSRNOG00000004373.6	19:24849355-24854953	1730	4.3785e-07	30.925	6.35842e-05
ENSRNOT00000060698	Midn	ENSRNOG00000015434.7	7:12414732-12424367	3345	4.41486e-07	3.30208	6.39644e-05
ENSRNOT00000057045	Adamts9	ENSRNOG00000023257.5	4:124660261-124858250	7965	4.41714e-07	5.5533	6.39644e-05
ENSRNOT00000000541	Slc39a7	ENSRNOG00000000465.7	20:3819422-3822754	1952	4.43966e-07	17.9418	6.41999e-05
ENSRNOT00000012394	Osgin2	ENSRNOG00000009358.6	5:29663684-29682005	1946	4.47183e-07	4.69775	6.45743e-05
ENSRNOT00000093099	Eri3	ENSRNOG00000019381.9	5:136406129-136533071	1328	4.57099e-07	40.2694	6.59135e-05
ENSRNOT00000022534	Tpra1	ENSRNOG00000016665.7	4:120843452-120854529	1668	4.60834e-07	-2.39156	6.62658e-05
ENSRNOT00000054973	Nploc4	ENSRNOG00000036698.4	10:109552648-109610030	4502	4.66904e-07	2.17047	6.69999e-05
ENSRNOT00000017254	Rhoc	ENSRNOG00000012630.6	2:207271942-207278004	1277	4.67244e-07	4.11907	6.69999e-05
ENSRNOT00000027425	Hnrnpl	ENSRNOG00000020235.8	1:86996092-87006776	2185	4.84634e-07	2.32801	6.93189e-05
ENSRNOT00000080585	LOC108348112	ENSRNOG00000000461.7	20:5262465-5269337	3379	4.89102e-07	2.51663	6.97966e-05
ENSRNOT00000073950	Dync1h1	ENSRNOG00000006178.8	6:134958853-135085769	14279	4.89466e-07	2.00736	6.97966e-05
ENSRNOT00000029819	Irak2	ENSRNOG00000021817.5	4:145594574-145651053	2944	5.00084e-07	4.47167	7.10187e-05
ENSRNOT00000023447	Acly	ENSRNOG00000016924.8	10:88392247-88442845	4327	5.16078e-07	-2.99044	7.30838e-05
ENSRNOT00000013613	Txnrd1	ENSRNOG00000009088.7	7:26946124-26984400	3430	5.26246e-07	2.40515	7.4421e-05
ENSRNOT00000048030	Usp13	ENSRNOG00000030639.5	2:119197238-119317500	7545	5.64539e-07	3.93255	7.96171e-05
ENSRNOT00000085315	Errfi1	ENSRNOG00000058186.1	5:167952727-167966009	2980	6.1385e-07	4.63983	8.57469e-05
ENSRNOT00000027666	Stxbp3	ENSRNOG00000020392.7	2:211595658-211638788	2524	6.17436e-07	-3.82114	8.61307e-05
ENSRNOT00000014489	Tprn	ENSRNOG00000010896.5	3:2480231-2487710	2731	6.50965e-07	3.3159	9.01951e-05
ENSRNOT00000089050	5_8S_rRNA	ENSRNOG00000051831.1	1:11906440-11906593	153	7.2391e-07	-15.6835	9.97434e-05
ENSRNOT00000021353	Lrp4	ENSRNOG00000015285.6	3:80362857-80416679	7784	7.24735e-07	5.61342	9.97434e-05
ENSRNOT00000021648	Cirbp	ENSRNOG00000015999.6	7:12401206-12405022	1407	7.40312e-07	-9.05727	0.000101751
ENSRNOT00000026654	Ptprn	ENSRNOG00000019587.6	9:82446632-82461903	3614	7.43593e-07	4.31894	0.000102065
ENSRNOT00000008337	Aco1	ENSRNOG00000005849.7	5:56425023-56481218	3465	7.57555e-07	-2.47235	0.000103704
ENSRNOT00000005910	Btg1	ENSRNOG00000004284.4	7:37812830-37815088	1462	7.70971e-07	2.54187	0.0001054
ENSRNOT00000071439	LOC100911515	ENSRNOG00000050669.2	9:20213775-20216608	750	8.4253e-07	-2.97176	0.000113819
ENSRNOT00000033784	Kif20a	ENSRNOG00000024428.4	18:27424327-27432814	2921	9.24246e-07	10.1531	0.000123719
ENSRNOT00000075700	Ccdc9	ENSRNOG00000048848.2	1:78213222-78224319	1761	1.0344e-06	-2.19218	0.000136484
ENSRNOT00000065041	Rgs7	ENSRNOG00000021984.6	13:93095199-93307199	2607	1.04065e-06	6.66121	0.000136979
ENSRNOT00000011019	Ccnq	ENSRNOG00000022582.2	10:66019519-66020682	1163	1.06345e-06	-3.05651	0.000139266
ENSRNOT00000027234	Slc16a1	ENSRNOG00000019996.5	2:207108551-207128554	2487	1.1488e-06	2.99016	0.0001493
ENSRNOT00000022095	Clu	ENSRNOG00000016460.7	15:42653147-42665857	1644	1.2612e-06	2.74691	0.000163082
ENSRNOT00000021286	Epn1	ENSRNOG00000015753.6	1:72294152-72311856	2171	1.37047e-06	-3.59114	0.000175158
ENSRNOT00000009020	Dtd2	ENSRNOG00000006727.5	6:72780542-72786830	1304	1.37883e-06	-3.9339	0.000175638
ENSRNOT00000018782	Zc3hav1	ENSRNOG00000013948.5	4:66011914-66062089	5081	1.39394e-06	2.16681	0.000177343
ENSRNOT00000049448	LOC100911766	ENSRNOG00000029810.3	1:214454089-214473741	1410	1.44801e-06	-2.32482	0.000183043
ENSRNOT00000014277	Atoh8	ENSRNOG00000010716.3	4:100067340-100099517	2375	1.65385e-06	4.91408	0.000204826
ENSRNOT00000000889	Tmem119	ENSRNOG00000000700.4	12:48598646-48605704	2167	1.70856e-06	3.77245	0.000211347
ENSRNOT00000072533	AABR07016141.1	ENSRNOG00000046536.1	14:94590764-94602088	507	1.7108e-06	-4.45785	0.00021137
ENSRNOT00000013581	Arih1	ENSRNOG00000009887.7	8:64166359-64268555	5112	1.71643e-06	2.49046	0.00021181
ENSRNOT00000089007	Lsm8	ENSRNOG00000058677.1	4:45555076-45560943	797	1.74662e-06	-2.85931	0.000214515
ENSRNOT00000090506	Pdzrn3	ENSRNOG00000057556.1	4:133717138-133951264	4109	1.76999e-06	-3.53261	0.000217114
ENSRNOT00000073321	Fasn	ENSRNOG00000045636.2	10:109987734-110005901	9139	1.79239e-06	-3.44008	0.000219599
ENSRNOT00000041277	Ptbp1	ENSRNOG00000010448.9	7:12664036-12673687	2704	1.86993e-06	7.93743	0.00022806
ENSRNOT00000072943	LOC100910446	ENSRNOG00000048248.2	1:23543425-23556241	1107	1.88307e-06	20.1736	0.000229341
ENSRNOT00000079085	Ctnnb1	ENSRNOG00000054172.1	8:129617811-129627372	2403	1.94392e-06	2.00272	0.000236005
ENSRNOT00000074772	Usp19	ENSRNOG00000049531.2	8:117282389-117291031	4292	2.01857e-06	2.59645	0.000243247
ENSRNOT00000007061	Trip11	ENSRNOG00000005292.7	6:125742795-125812517	8348	2.33861e-06	6.79819	0.000278867
ENSRNOT00000011373	Ost4	ENSRNOG00000008605.4	6:26836243-26837440	552	2.42851e-06	2.36504	0.000288249
ENSRNOT00000077417	Satb1	ENSRNOG00000012942.6	9:2190914-2272687	2626	2.51994e-06	7.38163	0.000298265
ENSRNOT00000072299	Nbl1	ENSRNOG00000049402.2	5:157524512-157535664	1795	2.62902e-06	2.17481	0.000308482
ENSRNOT00000018844	Matn4	ENSRNOG00000014021.6	3:160838631-160853650	2292	2.62494e-06	4.57045	0.000308482
ENSRNOT00000078403	Epg5	ENSRNOG00000052894.1	18:74299930-74395547	8057	2.72885e-06	3.66116	0.000319102
ENSRNOT00000021751	Dek	ENSRNOG00000016152.4	17:17965880-17987834	2551	2.80422e-06	-2.46386	0.000326427
ENSRNOT00000013575	Lrrc42	ENSRNOG00000009983.6	5:126835154-126856292	1697	2.81165e-06	-3.36145	0.000326884
ENSRNOT00000056151	Serf2	ENSRNOG00000015277.7	3:113415773-113417478	541	3.10059e-06	2.03124	0.000356881
ENSRNOT00000009249	Psmd6	ENSRNOG00000006751.5	15:12407523-12416105	1361	3.10822e-06	2.05361	0.000357358
ENSRNOT00000020787	Zfp444	ENSRNOG00000015517.7	1:71382487-71399751	1501	3.11997e-06	34.5259	0.000357908
ENSRNOT00000023143	Otud3	ENSRNOG00000017037.7	5:157346285-157368450	1528	3.12995e-06	5.49944	0.000358651
ENSRNOT00000047779	RT1-CE4	ENSRNOG00000039744.5	20:4673657-4935414	1558	3.22353e-06	2.07277	0.000367325
ENSRNOT00000013078	Frg1	ENSRNOG00000009846.7	16:53957857-53978865	1113	3.30751e-06	-2.53304	0.000375644
ENSRNOT00000015308	LOC103692719	ENSRNOG00000011398.4	6:136150790-136156781	1834	3.7328e-06	2.34206	0.000414769
ENSRNOT00000003173	Hnrnpd	ENSRNOG00000002292.8	14:11256267-11274578	1643	3.7634e-06	-2.67394	0.000417717
ENSRNOT00000043082	Aak1	ENSRNOG00000018317.6	4:118655727-118795774	7976	3.97395e-06	6.35536	0.000439638
ENSRNOT00000011970	Malsu1	ENSRNOG00000009035.4	4:78735278-78744102	747	3.97802e-06	-2.42928	0.000439638
ENSRNOT00000018464	Tinagl1	ENSRNOG00000013179.5	5:148382709-148392689	1919	4.09191e-06	2.13298	0.000451253
ENSRNOT00000028413	Lin37	ENSRNOG00000020929.5	1:89010256-89014189	998	4.21939e-06	2.27772	0.000463816
ENSRNOT00000020635	Rpl13	ENSRNOG00000015335.6	19:55917735-55919996	636	4.21585e-06	2.13553	0.000463816
ENSRNOT00000075656	Crlf2	ENSRNOG00000049828.1	14:1456843-1461543	1266	4.60716e-06	2.01743	0.000502675
ENSRNOT00000023289	Rsrp1	ENSRNOG00000017309.7	5:153260929-153264669	1515	4.67961e-06	2.61503	0.000509497
ENSRNOT00000000522	RT1-Db1	ENSRNOG00000033215.6	20:4087617-4097090	1175	4.71167e-06	3.20311	0.000511902
ENSRNOT00000064663	Frmd5	ENSRNOG00000016189.8	3:113483964-113519780	1260	4.85457e-06	10.8519	0.000524651
ENSRNOT00000008868	Rab33a	ENSRNOG00000006698.6	X:135348435-135360203	1357	4.9952e-06	-2.49572	0.000538662
ENSRNOT00000073107	Polr2i	ENSRNOG00000050560.1	1:91041213-91042230	378	5.14179e-06	-3.11368	0.000552783
ENSRNOT00000082857	Selenoh	ENSRNOG00000054563.1	3:72070389-72071895	654	5.4121e-06	-10.5882	0.00057761
ENSRNOT00000079707	Nucks1	ENSRNOG00000047287.2	13:48689961-48704771	732	5.48427e-06	-7.35987	0.000584704
ENSRNOT00000026017	Ctrb1	ENSRNOG00000019068.4	19:43906291-43911057	881	5.64326e-06	24.7499	0.00059793
ENSRNOT00000064638	Trub2	ENSRNOG00000043189.3	3:8338483-8348746	1295	5.66307e-06	-2.58856	0.000599409
ENSRNOT00000015474	Hspa4l	ENSRNOG00000010819.6	2:127625682-127677503	4208	6.12209e-06	5.69449	0.000640729
ENSRNOT00000017720	Mettl3	ENSRNOG00000013111.7	15:28710299-28721127	1908	6.13643e-06	-2.29776	0.000641576
ENSRNOT00000075153	Kcnk5	ENSRNOG00000047005.2	15:4554602-4597000	3464	6.21752e-06	9.71826	0.000647417
ENSRNOT00000077968	RGD1307554	ENSRNOG00000018408.7	1:84361735-84385727	2677	6.30327e-06	2.66902	0.000654355
ENSRNOT00000082990	Mocs2	ENSRNOG00000056325.1	2:46981009-46992883	1555	6.36469e-06	-2.20074	0.000659398
ENSRNOT00000003020	Stbd1	ENSRNOG00000002218.5	14:16976355-16979760	1933	6.71463e-06	2.50817	0.000692855
ENSRNOT00000023999	Zfp771	ENSRNOG00000043225.3	1:198690793-198700969	954	6.96744e-06	40.4008	0.000716781
ENSRNOT00000006314	Pam16	ENSRNOG00000004608.5	10:11146358-11153936	522	7.27841e-06	2.21198	0.000745039
ENSRNOT00000026428	Stard10	ENSRNOG00000019491.6	1:166433108-166457505	1250	7.37823e-06	-3.25607	0.000753754
ENSRNOT00000000172	Cdo1	ENSRNOG00000000158.5	18:40701983-40716686	1516	7.76615e-06	-2.94116	0.000791023
ENSRNOT00000001467	Denr	ENSRNOG00000001106.7	12:38096033-38116919	582	7.79065e-06	-2.64196	0.000792732
ENSRNOT00000010369	Lactb2	ENSRNOG00000007829.4	5:4982347-5005109	1201	7.89521e-06	-2.52133	0.000801781
ENSRNOT00000086605	Chtopl1	ENSRNOG00000058457.1	4:163118451-163119391	802	8.95866e-06	2.83499	0.000898616
ENSRNOT00000008703	Rai2	ENSRNOG00000006670.3	X:34731890-34794589	2564	9.02598e-06	-4.49413	0.000903214
ENSRNOT00000026734	Tm9sf1	ENSRNOG00000019710.6	15:34314655-34322115	2405	9.13864e-06	-8.58685	0.000911821
ENSRNOT00000070858	Tmem200a	ENSRNOG00000047783.2	1:20331975-20412381	4091	9.23191e-06	-2.16279	0.000920233
ENSRNOT00000011907	Chmp5	ENSRNOG00000008672.7	5:57267311-57284448	1320	9.43615e-06	4.63318	0.000938769
ENSRNOT00000014980	Cipc	ENSRNOG00000011111.6	6:110968060-110990912	3986	9.46557e-06	-3.49744	0.000939874
ENSRNOT00000090858	Zc3h11a	ENSRNOG00000053210.1	13:50196041-50234862	2691	9.60197e-06	2.00644	0.00095066
ENSRNOT00000044866	Sf1	ENSRNOG00000021085.8	1:221735527-221749086	2649	9.64442e-06	2.16656	0.000953943
ENSRNOT00000007485	Art4	ENSRNOG00000005670.5	4:170830850-170841187	2436	9.92096e-06	-5.87679	0.000974722
ENSRNOT00000011490	Xpc	ENSRNOG00000008274.3	4:123134456-123161985	3633	9.93718e-06	-4.11857	0.000975383
ENSRNOT00000066363	Cyp1b1	ENSRNOG00000040287.4	6:2314927-2316722	1414	1.00832e-05	2.76874	0.000986884
ENSRNOT00000090499	B4galt1	ENSRNOG00000059461.1	5:57121768-57168610	2291	1.0209e-05	42.5779	0.0009979
ENSRNOT00000019602	Tmtc4	ENSRNOG00000014310.7	15:109339563-109394905	2586	1.02346e-05	-2.63218	0.0009979
ENSRNOT00000075987	Bud31	ENSRNOG00000000989.8	12:11232963-11240399	712	1.08613e-05	9.39883	0.00105677
ENSRNOT00000041950	Slc6a5	ENSRNOG00000031662.4	1:105284752-105336363	7059	1.09334e-05	13.3887	0.001062
ENSRNOT00000027375	Rgs10	ENSRNOG00000042592.2	1:199782077-199823386	841	1.10497e-05	2.9061	0.00107126
ENSRNOT00000071913	Atp5f1e	ENSRNOG00000049912.2	3:172563104-172566010	375	1.21429e-05	-247.326	0.00116406
ENSRNOT00000002425	Senp2	ENSRNOG00000001773.7	11:82630435-82664554	1808	1.21921e-05	2.52704	0.0011666
ENSRNOT00000006483	Arf2	ENSRNOG00000004807.6	10:92018561-92040333	2177	1.24002e-05	2.13911	0.00118156
ENSRNOT00000059127	Cryab	ENSRNOG00000010524.6	8:55178288-55182545	1248	1.28751e-05	11.2594	0.00122171
ENSRNOT00000093603	Fbxl3	ENSRNOG00000059334.2	15:93649249-93666808	1476	1.34016e-05	5.2455	0.00126932
ENSRNOT00000066997	Igsf11	ENSRNOG00000001525.7	11:64286693-64421248	3618	1.38273e-05	-2.09357	0.00130722
ENSRNOT00000084924	Mycn	ENSRNOG00000051372.1	6:38222554-38228379	2610	1.43591e-05	5.22996	0.00135253
ENSRNOT00000016387	Ap3m1	ENSRNOG00000011461.4	15:3436360-3454279	3158	1.51165e-05	-2.4879	0.00141606
ENSRNOT00000072616	Dedd2	ENSRNOG00000046112.2	1:82072543-82088275	2225	1.52579e-05	3.98966	0.00142671
ENSRNOT00000017758	Tnfsf10	ENSRNOG00000013269.5	2:113007548-113026899	3845	1.53245e-05	-2.43234	0.00143118
ENSRNOT00000067843	LOC103691744	ENSRNOG00000010658.6	2:264266983-264293046	1813	1.56672e-05	3.70616	0.00146099
ENSRNOT00000005825	Sptssa	ENSRNOG00000004292.6	6:75540173-75551625	1293	1.5738e-05	-2.05283	0.00146493
ENSRNOT00000010050	Zswim4	ENSRNOG00000007582.6	19:25320682-25345790	4598	1.59076e-05	3.12582	0.00147671
ENSRNOT00000016984	Vamp5	ENSRNOG00000012659.5	4:100231560-100232559	306	1.61769e-05	-6.7922	0.00149899
ENSRNOT00000004081	Ttyh2	ENSRNOG00000024578.7	10:103206013-103248862	2742	1.70351e-05	-2.31624	0.0015616
ENSRNOT00000091543	Mknk1	ENSRNOG00000010381.7	5:134691880-134730893	2642	1.7949e-05	-2.29538	0.00163758
ENSRNOT00000004508	Klhl21	ENSRNOG00000003334.5	5:169181417-169190073	3830	1.95219e-05	2.71278	0.00176903
ENSRNOT00000083287	Zfyve27	ENSRNOG00000014903.7	1:261415190-261438539	5418	1.97096e-05	2.5905	0.00178292
ENSRNOT00000087662	Gpd1	ENSRNOG00000056457.1	7:141370490-141377928	2871	1.97861e-05	-2.56093	0.00178824
ENSRNOT00000019062	Ogfrl1	ENSRNOG00000014142.6	9:29634178-29647903	1705	2.03515e-05	3.00267	0.00183611
ENSRNOT00000011840	Parp2	ENSRNOG00000008892.6	15:27739250-27749648	1982	2.08107e-05	-15.6612	0.00187424
ENSRNOT00000067502	Lmo4	ENSRNOG00000009205.6	2:250218669-250235435	1594	2.22877e-05	4.31322	0.00199832
ENSRNOT00000023659	Srd5a1	ENSRNOG00000017601.7	1:36320460-36354756	2719	2.25496e-05	-2.0572	0.00201144
ENSRNOT00000075602	Gmfb	ENSRNOG00000047250.2	15:23601367-23606634	459	2.33904e-05	3.76673	0.00207921
ENSRNOT00000022557	Dgat2	ENSRNOG00000016573.6	1:164113458-164143818	2294	2.46241e-05	-3.313	0.00217382
ENSRNOT00000092133	Scn1b	ENSRNOG00000021102.5	1:89550737-89559960	1281	2.51579e-05	-3.38819	0.00221333
ENSRNOT00000013114	Mrpl10	ENSRNOG00000009567.8	10:84976376-84984780	1686	2.65891e-05	22.1034	0.0023253
ENSRNOT00000007197	Csrnp3	ENSRNOG00000005359.7	3:51883558-52120290	2535	2.68198e-05	12.3589	0.00234348
ENSRNOT00000026586	Pde2a	ENSRNOG00000019560.7	1:166534642-166626147	4155	2.68629e-05	2.70391	0.00234525
ENSRNOT00000045156	LOC100360841	ENSRNOG00000033803.5	9:69790830-69791196	366	2.71924e-05	-2.08179	0.00236798
ENSRNOT00000042965	Rtn4	ENSRNOG00000004621.8	14:114152471-114173643	762	2.79725e-05	-4.06567	0.00243178
ENSRNOT00000078354	Oxr1	ENSRNOG00000056487.1	7:80713372-80788094	4218	2.8249e-05	-2.00881	0.00245326
ENSRNOT00000023068	Igfbp2	ENSRNOG00000016957.5	9:80118028-80144789	1280	2.82673e-05	2.0988	0.00245326
ENSRNOT00000006481	Arl14ep	ENSRNOG00000004891.4	3:97983685-97993684	1317	2.87091e-05	-6.22247	0.0024874
ENSRNOT00000045974	Ddx39a	ENSRNOG00000004373.6	19:24846937-24854884	1715	2.906e-05	21.6779	0.00251355
ENSRNOT00000075952	Palm2	ENSRNOG00000025558.8	5:74649764-74788497	2943	2.91861e-05	8.64757	0.00252021
ENSRNOT00000046201	Mt-atp8	ENSRNOG00000033299.3	MT:7757-7961	204	2.99321e-05	-2.78483	0.00256951
ENSRNOT00000026327	Dag1	ENSRNOG00000019400.7	8:116980496-116993193	5184	3.09281e-05	-2.00099	0.00264616
ENSRNOT00000023428	Snx33	ENSRNOG00000017382.4	8:61584655-61595032	3949	3.15182e-05	-2.60893	0.00268769
ENSRNOT00000084674	Tmbim6	ENSRNOG00000055579.1	7:141053875-141068789	898	3.2737e-05	16.1712	0.002769
ENSRNOT00000065625	Lsm5	ENSRNOG00000042126.1	4:87016002-87019219	539	3.27414e-05	-2.2127	0.002769
ENSRNOT00000028331	Frmd8	ENSRNOG00000020881.7	1:221213311-221233962	2920	3.29206e-05	-2.63851	0.00278186
ENSRNOT00000048738	Tmem39a	ENSRNOG00000003075.6	11:64723185-64752544	2075	3.32749e-05	2.632	0.00280487
ENSRNOT00000019184	Ptges2	ENSRNOG00000014050.6	3:11424098-11431402	2163	3.35725e-05	3.26614	0.00282763
ENSRNOT00000067502	Lmo4	ENSRNOG00000009205.6	2:250218669-250241673	1594	3.37787e-05	4.34196	0.00284267
ENSRNOT00000022824	Chka	ENSRNOG00000016791.8	1:219077770-219126220	2530	3.39985e-05	2.03604	0.00285649
ENSRNOT00000015843	Blvra	ENSRNOG00000011778.6	3:119561289-119577806	1109	3.44544e-05	2.44253	0.00288535
ENSRNOT00000025608	Nutf2	ENSRNOG00000018945.4	19:37830916-37852189	1927	3.55027e-05	2.79304	0.00295741
ENSRNOT00000014235	Acsl1	ENSRNOG00000010633.3	16:48937455-48981980	3661	3.59188e-05	-2.20751	0.0029814
ENSRNOT00000009082	Rpain	ENSRNOG00000006913.7	10:57606649-57613747	660	3.6791e-05	-5.26254	0.00304378
ENSRNOT00000013694	Lef1	ENSRNOG00000010121.5	2:236233238-236345056	2578	3.70775e-05	-2.58343	0.00306254
ENSRNOT00000005502	RGD1311745	ENSRNOG00000004135.6	8:132029620-132032971	775	3.73741e-05	-2.64903	0.00308457
ENSRNOT00000091147	Fam3a	ENSRNOG00000060623.1	X:156319686-156328298	1694	3.76526e-05	-12.2909	0.00310256
ENSRNOT00000088689	LOC100365363	ENSRNOG00000059492.1	1:60884760-60894948	4405	3.81818e-05	-3.35394	0.0031361
ENSRNOT00000030559	Tstd3	ENSRNOG00000028185.5	5:35892736-35902262	1595	3.86506e-05	-2.13385	0.00316953
ENSRNOT00000023554	Hmgcs1	ENSRNOG00000016552.6	2:52431600-52445055	3220	3.87206e-05	-3.26718	0.00317274
ENSRNOT00000019964	RGD1560065	ENSRNOG00000014857.6	2:251817693-251824784	1704	3.95049e-05	3.81069	0.00322993
ENSRNOT00000039857	Cpne8	ENSRNOG00000026128.4	7:131623180-131798236	3380	4.0021e-05	3.7794	0.00326626
ENSRNOT00000077078	Ip6k2	ENSRNOG00000020361.7	8:117574160-117599843	1758	4.03026e-05	2.49273	0.00328402
ENSRNOT00000074942	Apoc3	ENSRNOG00000047503.2	8:50529317-50531498	536	4.22446e-05	3.64055	0.00341516
ENSRNOT00000026601	Mk1	ENSRNOG00000019657.3	16:20531719-20534209	2490	4.27073e-05	-3.3183	0.00344173
ENSRNOT00000089417	Ddr1	ENSRNOG00000057125.1	20:3556974-3575780	3676	4.35117e-05	-5.04621	0.0035038
ENSRNOT00000080266	Pacsin3	ENSRNOG00000014204.7	3:80075990-80081047	1756	4.60234e-05	-2.90541	0.00367721
ENSRNOT00000090051	Atp5mc2	ENSRNOG00000015320.7	7:144264198-144269486	626	4.67911e-05	-4.21683	0.00372695
ENSRNOT00000058190	Ndufc1	ENSRNOG00000038218.3	2:140462899-140464607	384	4.79306e-05	-2.17521	0.00380296
ENSRNOT00000064358	Bmyc	ENSRNOG00000042556.1	3:2916661-2917421	760	5.10966e-05	-2.56976	0.00403545
ENSRNOT00000091645	Ccnt2	ENSRNOG00000017113.7	13:44475972-44512388	2201	5.28373e-05	4.28434	0.00416332
ENSRNOT00000079128	AC094643.2	ENSRNOG00000053040.1	7:11181385-11182279	894	5.32086e-05	-7.87436	0.00418295
ENSRNOT00000001720	Mafk	ENSRNOG00000001277.4	12:16923989-16934706	2645	5.31373e-05	2.65982	0.00418295
ENSRNOT00000014941	Anxa11	ENSRNOG00000010984.6	16:3867207-3912148	2394	5.37351e-05	2.02652	0.0042211
ENSRNOT00000004956	Col3a1	ENSRNOG00000003357.4	9:52023294-52059217	4765	5.44899e-05	2.14391	0.00427386
ENSRNOT00000012578	Fstl3	ENSRNOG00000009311.6	7:12804918-12810570	1897	5.68825e-05	2.64239	0.00444792
ENSRNOT00000077290	RGD1562747	ENSRNOG00000037352.3	8:69484173-69489891	2684	5.72855e-05	9.67035	0.00447603
ENSRNOT00000050063	MGC108823	ENSRNOG00000019542.5	18:55576238-55584957	1594	5.81087e-05	-3.43283	0.00453345
ENSRNOT00000082513	Whrn	ENSRNOG00000001700.7	5:79234949-79317110	3303	6.16457e-05	2.2679	0.00475519
ENSRNOT00000027989	Snrnp25	ENSRNOG00000020626.7	10:15686007-15689325	767	6.2116e-05	-30.8517	0.0047807
ENSRNOT00000038439	Adprh	ENSRNOG00000027260.4	11:64861767-64868108	1521	6.47008e-05	-2.18333	0.00493157
ENSRNOT00000085696	LOC100912262	ENSRNOG00000050193.2	12:29012694-29080011	3592	6.75524e-05	5.89265	0.00511098
ENSRNOT00000020749	Spr	ENSRNOG00000015455.6	4:116912350-116916236	1357	6.83114e-05	-2.65159	0.0051608
ENSRNOT00000005311	Col1a1	ENSRNOG00000003897.6	10:82745800-82762789	5825	7.12553e-05	2.96914	0.00535171
ENSRNOT00000011333	Rps7	ENSRNOG00000008551.7	6:47899557-47904163	585	7.16691e-05	-75.4162	0.00537885
ENSRNOT00000079456	Ahnak	ENSRNOG00000057569.1	1:225184938-225215015	17592	7.20852e-05	-14.1706	0.00540218
ENSRNOT00000078383	Gcat	ENSRNOG00000055408.1	7:120263053-120269451	1571	7.2205e-05	2.1164	0.00540721
ENSRNOT00000057386	Col4a1	ENSRNOG00000016281.5	16:83522161-83632153	6579	7.25332e-05	2.04503	0.00541993
ENSRNOT00000086530	Pex16	ENSRNOG00000006539.7	3:81287241-81292573	1221	7.287e-05	-2.37143	0.00544113
ENSRNOT00000014180	Ca3	ENSRNOG00000010079.6	2:88126666-88135410	1586	7.33299e-05	-2.1746	0.00546752
ENSRNOT00000079415	Tmem150a	ENSRNOG00000061100.1	4:100218660-100222130	1450	7.70074e-05	2.7115	0.00570033
ENSRNOT00000016756	Cln8	ENSRNOG00000012565.4	16:79828323-79838212	2222	7.76111e-05	3.83741	0.00573789
ENSRNOT00000050885	Zfp958	ENSRNOG00000030410.3	12:5485902-5490935	1392	7.86311e-05	-2.69926	0.00580795
ENSRNOT00000060691	Nfx1	ENSRNOG00000009015.7	5:57291300-57332697	2457	7.98251e-05	2.06266	0.00588767
ENSRNOT00000072519	Zbtb7c	ENSRNOG00000047924.1	18:72005580-72462292	4037	8.09423e-05	2.96456	0.00595724
ENSRNOT00000036247	LOC103690006	ENSRNOG00000022082.6	4:117800627-117814658	1130	8.39927e-05	3.11695	0.00614649
ENSRNOT00000035411	Lrat	ENSRNOG00000025608.4	2:181900498-181905300	1092	8.79611e-05	3.30111	0.00639134
ENSRNOT00000009610	Frmd6	ENSRNOG00000007329.8	6:93281407-93358840	4623	8.80738e-05	-2.36032	0.00639445
ENSRNOT00000070933	Nudt13	ENSRNOG00000048195.2	15:4434312-4454958	2549	9.34026e-05	-3.29661	0.00673904
ENSRNOT00000006720	LOC100911917	ENSRNOG00000005059.5	3:4861752-4866833	1333	9.83578e-05	-9.97509	0.00704212
ENSRNOT00000020077	AABR07005588.1	ENSRNOG00000014946.7	1:189457582-189460844	2266	9.84467e-05	-2.30263	0.00704357
ENSRNOT00000020907	Mfsd14a	ENSRNOG00000015502.7	2:219662063-219693629	1856	9.90592e-05	10.3017	0.0070726
ENSRNOT00000008677	Tmem106b	ENSRNOG00000006206.7	4:39517678-39534490	1853	0.000100491	-2.1633	0.00716981
ENSRNOT00000004357	Mprip	ENSRNOG00000003226.8	10:46018658-46133571	3779	0.00010058	4.45669	0.00717121
ENSRNOT00000037685	Mtus1	ENSRNOG00000010748.8	16:54332659-54386129	4090	0.000102136	2.55746	0.00726698
ENSRNOT00000082156	Lrat	ENSRNOG00000025608.4	2:181896304-181900856	4522	0.000103363	2.3422	0.00734412
ENSRNOT00000067875	Spp1	ENSRNOG00000043451.4	14:6673685-6679901	1467	0.000104347	5.04799	0.00739869
ENSRNOT00000087118	Mgrn1	ENSRNOG00000003234.7	10:10835903-10881844	1665	0.000105113	-21.4374	0.00744789
ENSRNOT00000024251	Hspbp1	ENSRNOG00000017795.5	1:72732667-72756082	1440	0.000106806	2.37076	0.00755215
ENSRNOT00000042925	Ids	ENSRNOG00000001465.7	8:69449800-69466618	1581	0.000113384	4.89415	0.00795157
ENSRNOT00000005687	Baiap2	ENSRNOG00000004049.7	10:109107449-109187115	1605	0.000113791	3.29172	0.0079747
ENSRNOT00000083714	Fopnl	ENSRNOG00000053230.1	10:730246-751061	1455	0.000115554	-2.96978	0.00807617
ENSRNOT00000060608	Mmd2	ENSRNOG00000001113.6	12:14021726-14078134	2146	0.000117254	-2.1402	0.00817274
ENSRNOT00000086206	Tmem11	ENSRNOG00000005377.6	10:47117134-47131842	1484	0.000119129	2.77867	0.00827537
ENSRNOT00000025433	Psmd5	ENSRNOG00000018809.7	3:13916202-13933658	2213	0.000119839	-2.02196	0.0083074
ENSRNOT00000025323	Amacr	ENSRNOG00000018662.7	2:60949255-60961326	1515	0.000120495	2.87225	0.0083252
ENSRNOT00000005383	Dusp1	ENSRNOG00000003977.5	10:16970625-16973418	1936	0.000121766	3.9207	0.00839608
ENSRNOT00000090426	Slc25a12	ENSRNOG00000022922.6	3:57882420-57913999	1149	0.000123288	-10.7989	0.00844989
ENSRNOT00000087718	Sec63	ENSRNOG00000000314.7	20:47494423-47559979	2557	0.000123552	3.64388	0.00846234
ENSRNOT00000007698	Gadd45a	ENSRNOG00000005615.6	4:97782511-97784842	1241	0.00013215	5.29376	0.00897341
ENSRNOT00000014382	Ppif	ENSRNOG00000010558.7	16:1979190-1985908	1481	0.000138951	-31.2111	0.00934259
ENSRNOT00000002119	RGD1563888	ENSRNOG00000001554.7	11:17076979-17130120	1692	0.000154362	4.2589	0.0102645
ENSRNOT00000082017	Cyp1b1	ENSRNOG00000040287.4	6:2310987-2316717	2314	0.000155245	3.72459	0.0103032
ENSRNOT00000083410	Lysmd2	ENSRNOG00000010642.5	8:82560970-82577019	1588	0.000157269	-4.05443	0.0103972
ENSRNOT00000065729	LOC100910882	ENSRNOG00000049814.2	3:152226709-152259156	1977	0.000157856	13.3078	0.0104158
ENSRNOT00000073575	Fzd8	ENSRNOG00000061031.1	17:62262128-62265113	2985	0.000161011	-4.09064	0.0105765
ENSRNOT00000068633	Aox1	ENSRNOG00000015354.8	9:64929720-65007870	4271	0.000163393	17.1979	0.0107124
ENSRNOT00000067391	Mt2A	ENSRNOG00000043098.1	19:11307966-11308740	382	0.000173257	-3.29982	0.0112798
ENSRNOT00000011392	Ppcs	ENSRNOG00000008572.6	5:138466292-138470096	1725	0.000174496	-2.83573	0.011342
ENSRNOT00000007367	Rbm3	ENSRNOG00000005387.6	X:15098903-15102340	1185	0.000177869	-2.2209	0.0115249
ENSRNOT00000044956	Cdv3	ENSRNOG00000010186.7	8:111840026-111850393	1213	0.000178642	5.5496	0.0115498
ENSRNOT00000007583	Srsf5	ENSRNOG00000005513.7	6:104611025-104615302	1180	0.000180352	-2.22222	0.0116531
ENSRNOT00000028079	Tmem216	ENSRNOG00000020692.5	1:226601200-226606344	1310	0.000180542	-2.08137	0.011658
ENSRNOT00000084928	Usp25	ENSRNOG00000001573.7	11:15436381-15558646	4426	0.000182411	-2.93056	0.0117565
ENSRNOT00000086433	Hdlbp	ENSRNOG00000031479.4	9:100576069-100592271	1878	0.000182948	3.91194	0.0117837
ENSRNOT00000078657	Yif1a	ENSRNOG00000020201.6	1:220470128-220474129	1030	0.000184446	-6.96594	0.0118579
ENSRNOT00000024609	Uqcrfs1	ENSRNOG00000018281.6	17:35677983-35682259	1085	0.000186203	-2.25545	0.0119634
ENSRNOT00000065497	Pink1	ENSRNOG00000015385.7	5:156677145-156689258	1146	0.000193789	-6.27129	0.0123887
ENSRNOT00000002542	Ydjc	ENSRNOG00000001861.6	11:88090920-88092756	1260	0.000195891	-2.55134	0.0125076
ENSRNOT00000017972	Casp9	ENSRNOG00000012944.7	5:160355832-160373778	2358	0.00020112	-3.70462	0.0127937
ENSRNOT00000005085	Atf3	ENSRNOG00000003745.3	13:109817894-109849632	1888	0.000208089	6.40121	0.013188
ENSRNOT00000023202	Pcif1	ENSRNOG00000016870.5	3:161343882-161356815	3977	0.000208298	-3.26634	0.0131931
ENSRNOT00000088442	Fxr1	ENSRNOG00000051480.1	2:120512898-120570355	2097	0.000213751	2.17021	0.0135051
ENSRNOT00000005967	Desi2	ENSRNOG00000004524.7	13:96111799-96154685	2047	0.000218222	3.80047	0.0137201
ENSRNOT00000093096	AC134224.1	ENSRNOG00000062127.1	1:221154560-221156910	2350	0.000222523	2.2066	0.0139712
ENSRNOT00000036819	Pex10	ENSRNOG00000024012.5	5:172469977-172475144	1699	0.000226113	-4.60685	0.0141555
ENSRNOT00000001856	Rasal1	ENSRNOG00000001374.6	12:41416217-41448668	3238	0.000228629	-2.72256	0.0142869
ENSRNOT00000066058	Mmadhc	ENSRNOG00000004740.7	3:35783622-35801614	1403	0.000231566	-2.18124	0.014444
ENSRNOT00000012577	Serpina1	ENSRNOG00000032669.5	6:127610242-127620296	1380	0.000234445	4.63697	0.0145915
ENSRNOT00000007261	Snupn	ENSRNOG00000005426.4	8:61615649-61648390	1333	0.000237266	-2.67749	0.0147369
ENSRNOT00000043269	AABR07066416.1	ENSRNOG00000031939.5	9:8629215-8632017	555	0.000243633	-2.86136	0.0150776
ENSRNOT00000045963	Sox11	ENSRNOG00000030034.4	6:46629973-46631983	2010	0.000245421	16.6676	0.0150973
ENSRNOT00000002827	Olig1	ENSRNOG00000028648.6	11:31428357-31430517	2160	0.000245421	17.7317	0.0150973
ENSRNOT00000026558	Ackr3	ENSRNOG00000019622.3	9:97355923-97367445	1936	0.000247622	7.75424	0.0152145
ENSRNOT00000045306	Ceacam16	ENSRNOG00000031391.4	1:80773818-80783898	1615	0.000248117	3.15948	0.0152266
ENSRNOT00000005648	Zfp386	ENSRNOG00000004268.7	6:143901319-143915944	1872	0.000248444	-3.0908	0.0152376
ENSRNOT00000019258	Pdcd7	ENSRNOG00000014340.6	8:70860670-70875471	2256	0.000254969	-6.41673	0.0156191
ENSRNOT00000011213	Hoxb2	ENSRNOG00000008365.5	10:84200879-84202688	1068	0.000256153	2.16121	0.0156823
ENSRNOT00000015767	Pnpla3	ENSRNOG00000022268.6	7:125034763-125055976	3215	0.000256779	-5.52739	0.0157113
ENSRNOT00000004174	Gc	ENSRNOG00000003119.4	14:20266890-20302581	1795	0.000259643	6.93766	0.0158487
ENSRNOT00000081634	Hmgb1	ENSRNOG00000058908.1	16:37500016-37502237	2221	0.000263821	-2.00728	0.0160634
ENSRNOT00000017137	Scgb1c1	ENSRNOG00000012847.5	1:213595239-213596459	459	0.000265041	2.80917	0.0161016
ENSRNOT00000087386	Cemip2	ENSRNOG00000012782.7	1:239398042-239474255	6330	0.000265452	3.93379	0.0161171
ENSRNOT00000072534	Cbx2	ENSRNOG00000049215.1	10:108132104-108140935	3750	0.000267261	4.85683	0.0161982
ENSRNOT00000044226	Septin4	ENSRNOG00000007367.8	10:74874129-74884196	1406	0.000267803	2.06287	0.0162214
ENSRNOT00000077530	Eogt	ENSRNOG00000024533.3	4:129477806-129514390	4068	0.00027253	-4.03898	0.0164592
ENSRNOT00000058422	AABR07034632.1	ENSRNOG00000038370.4	11:81711627-81717521	1059	0.000276613	9.01128	0.0166568
ENSRNOT00000078775	AABR07024908.1	ENSRNOG00000055634.1	16:21807190-21807526	336	0.000277435	2.23786	0.0166965
ENSRNOT00000092876	Myc	ENSRNOG00000004500.5	7:102588368-102589134	766	0.000279294	6.14016	0.0167887
ENSRNOT00000088355	Igfbp3	ENSRNOG00000061910.1	14:87457646-87465374	2407	0.000280176	2.31008	0.016822
ENSRNOT00000023521	Zfp335	ENSRNOG00000017290.8	3:161357277-161376119	4259	0.000281617	2.40943	0.0168888
ENSRNOT00000024098	Actn2	ENSRNOG00000017833.7	17:66304500-66397653	2978	0.000284588	2.82959	0.0170471
ENSRNOT00000026525	Eaf1	ENSRNOG00000019559.5	16:7588216-7602966	4853	0.000291542	2.9155	0.017423
ENSRNOT00000014629	Exosc10	ENSRNOG00000010719.5	5:165374950-165398217	2825	0.000291901	-2.38672	0.0174343
ENSRNOT00000041808	Vgf	ENSRNOG00000001416.5	12:22677606-22680630	2638	0.000292287	7.65691	0.0174471
ENSRNOT00000008764	Rbm38	ENSRNOG00000006420.6	3:171037956-171050475	1689	0.000300283	10.5375	0.0178002
ENSRNOT00000009136	Vcpip1	ENSRNOG00000006980.4	5:9230983-9257934	4173	0.000309865	5.2414	0.0182838
ENSRNOT00000066312	Cog8	ENSRNOG00000020379.7	19:39246624-39257451	2148	0.000310196	-2.70533	0.0182928
ENSRNOT00000088544	NEWGENE_1308196	ENSRNOG00000049330.2	9:44567205-44571261	483	0.000314866	-2.98215	0.0185
ENSRNOT00000048221	Nae1	ENSRNOG00000033133.4	19:653509-680376	1776	0.000323391	-3.44146	0.0189081
ENSRNOT00000077357	Slc39a7	ENSRNOG00000000465.7	20:3819413-3822778	2282	0.000331666	-2.05472	0.019293
ENSRNOT00000013043	Nampt	ENSRNOG00000009754.6	6:52122084-52156472	2562	0.000338906	2.37104	0.0196807
ENSRNOT00000038983	Tanc1	ENSRNOG00000025394.6	3:45683992-45917745	7459	0.000339812	2.57172	0.0197221
ENSRNOT00000058837	LOC100909849	ENSRNOG00000059244.1	17:62999665-63002650	2985	0.000349838	-3.76036	0.0202468
ENSRNOT00000089762	AABR07033324.1	ENSRNOG00000061099.1	11:17336443-17340373	1701	0.000353719	3.44423	0.0204139
ENSRNOT00000082125	Nectin2	ENSRNOG00000018730.7	1:80639784-80666566	1796	0.000355608	2.26905	0.0205114
ENSRNOT00000020309	Fbxo22	ENSRNOG00000022702.5	8:59769993-59786065	1832	0.000362779	-2.37727	0.0208547
ENSRNOT00000028734	Nudt22	ENSRNOG00000021158.4	1:222247501-222250980	1070	0.000365696	-3.73312	0.0209868
ENSRNOT00000026303	Egr1	ENSRNOG00000019422.4	18:27657627-27661429	3130	0.000366735	4.23295	0.021014
ENSRNOT00000008149	Ezh2	ENSRNOG00000006048.6	4:77284403-77347011	2794	0.000370192	4.89593	0.0211978
ENSRNOT00000014271	Prcp	ENSRNOG00000010630.6	1:157701088-157750169	2362	0.000376876	3.1478	0.0215444
ENSRNOT00000077502	Kmt2d	ENSRNOG00000061499.1	7:140489491-140546908	18521	0.00038834	3.25996	0.0221014
ENSRNOT00000021000	Brd9	ENSRNOG00000015676.7	1:31939584-31967915	2470	0.000389427	-2.89784	0.0221264
ENSRNOT00000013801	Spag1	ENSRNOG00000010078.5	7:74994604-75054293	3650	0.000396377	-2.94924	0.0224221
ENSRNOT00000064572	Agfg2	ENSRNOG00000001404.7	12:22082064-22118220	2742	0.000396916	-2.77694	0.0224402
ENSRNOT00000073220	LOC100911365	ENSRNOG00000045795.2	1:213951758-213957535	1500	0.000397394	-2.29657	0.0224497
ENSRNOT00000077894	Fosl2	ENSRNOG00000052357.1	6:25598935-25616995	744	0.00039793	2.1777	0.0224604
ENSRNOT00000083220	Cgnl1	ENSRNOG00000054080.1	8:78126674-78233430	6670	0.000418503	-2.13839	0.0234473
ENSRNOT00000079006	Mtus1	ENSRNOG00000010748.8	16:54291250-54383643	3673	0.000420519	-6.00531	0.0235156
ENSRNOT00000020822	Rhoq	ENSRNOG00000015415.6	6:10533150-10568581	3859	0.000427037	2.8198	0.0238152
ENSRNOT00000067479	Tmem141	ENSRNOG00000028254.4	3:2843634-2845593	780	0.000440044	-2.87381	0.0244213
ENSRNOT00000057073	Lrfn1	ENSRNOG00000019869.8	1:85291461-85300825	2507	0.000441948	-2.59916	0.0245093
ENSRNOT00000020662	Exosc9	ENSRNOG00000014674.7	2:123264720-123275623	1623	0.000442585	-2.49158	0.0245093
ENSRNOT00000026705	Lmna	ENSRNOG00000019638.7	2:187842884-187863516	3075	0.000445332	-2.82589	0.0246216
ENSRNOT00000078013	Esd	ENSRNOG00000009512.6	15:56757314-56776348	1127	0.000454328	2.13558	0.0250649
ENSRNOT00000016540	Thrsp	ENSRNOG00000012404.6	1:162381252-162385575	1232	0.000462735	-3.94748	0.0254467
ENSRNOT00000024947	Tubb6	ENSRNOG00000018371.4	18:63130541-63140181	1751	0.000473227	3.48654	0.0259126
ENSRNOT00000030290	Tmem186	ENSRNOG00000027087.2	10:7077487-7080798	2043	0.000477507	-2.10318	0.0261053
ENSRNOT00000014022	Myo10	ENSRNOG00000010161.8	2:77868431-78071309	6862	0.000490447	21.7462	0.0265862
ENSRNOT00000047354	Ca5b	ENSRNOG00000029330.4	X:32232141-32292072	2837	0.000493686	-3.83972	0.0267194
ENSRNOT00000025197	Plk3	ENSRNOG00000018484.5	5:135997724-136002900	2389	0.000494647	2.77828	0.0267432
ENSRNOT00000093365	Ass1	ENSRNOG00000008837.6	3:10327416-10375826	1651	0.000502132	4.74729	0.0270303
ENSRNOT00000018233	Pglyrp1	ENSRNOG00000013395.3	1:79790704-79796111	851	0.000503859	2.46355	0.0270844
ENSRNOT00000025043	Rabep2	ENSRNOG00000018462.7	1:197839429-197856312	2701	0.000508633	-2.32652	0.0273267
ENSRNOT00000006913	Sgpp1	ENSRNOG00000005175.6	6:98675325-98695988	2795	0.000509327	-3.50864	0.0273497
ENSRNOT00000009248	Ambp	ENSRNOG00000006889.4	5:78975677-78985990	1237	0.000520056	4.76346	0.0278121
ENSRNOT00000078415	Ccnjl	ENSRNOG00000003893.6	10:29165576-29181440	2616	0.000522001	7.77119	0.0278586
ENSRNOT00000018737	Gls2	ENSRNOG00000031612.3	7:2605718-2621852	2773	0.000523892	3.52003	0.0279273
ENSRNOT00000028143	Pten	ENSRNOG00000020723.3	1:251421595-251487832	1628	0.000532283	6.48584	0.0283011
ENSRNOT00000000716	Gtf3c6	ENSRNOG00000000586.6	20:45347270-45356358	1560	0.000536808	-2.13922	0.0285122
ENSRNOT00000076085	AABR07031445.1	ENSRNOG00000047261.3	18:14756683-14936053	524	0.000537588	-3.85026	0.0285389
ENSRNOT00000000079	Acot7	ENSRNOG00000010580.8	5:169357516-169450219	1499	0.000544174	2.24322	0.0288289
ENSRNOT00000027028	Anapc15	ENSRNOG00000019936.7	1:166983174-166985054	399	0.000545345	-7.76291	0.028876
ENSRNOT00000020472	Cxxc1	ENSRNOG00000014614.6	18:70192492-70197867	2625	0.000548429	-2.85299	0.0289945
ENSRNOT00000090870	Mitd1	ENSRNOG00000018467.7	9:44472537-44560837	1041	0.000554079	-7.58703	0.0292029
ENSRNOT00000085476	Eif4e2	ENSRNOG00000019634.9	9:94307851-94326898	1044	0.000573248	-2.27468	0.0299518
ENSRNOT00000063876	Gga1	ENSRNOG00000008897.6	7:120106900-120119737	2740	0.000575649	2.17902	0.0300467
ENSRNOT00000057880	LOC102553715	ENSRNOG00000045683.2	10:49000972-49003931	1504	0.000578527	3.38973	0.0301509
ENSRNOT00000012075	Ass1	ENSRNOG00000008837.6	3:10327413-10371240	1565	0.000583084	3.81774	0.0303576
ENSRNOT00000019047	Hint3	ENSRNOG00000014190.7	1:29413364-29423347	1079	0.000586747	-2.08984	0.0305019
ENSRNOT00000087247	AABR07015081.2	ENSRNOG00000054945.1	14:46653039-46657975	666	0.000588288	4.91451	0.0305666
ENSRNOT00000089055	LOC102548682	ENSRNOG00000061185.1	17:43776049-43776460	411	0.000592516	5.12723	0.0307441
ENSRNOT00000008941	Ddit3	ENSRNOG00000006789.6	7:70580251-70585074	813	0.000599867	2.51709	0.0310582
ENSRNOT00000071512	Hist2h4a	ENSRNOG00000045840.1	4:170763604-170763916	312	0.000619139	2.16902	0.0318472
ENSRNOT00000086306	Coq8a	ENSRNOG00000043201.2	13:98451941-98480419	2249	0.000623052	-32.3308	0.0320164
ENSRNOT00000071528	Gatd1	ENSRNOG00000046382.2	1:214389254-214394411	880	0.000623399	-3.70313	0.0320171
ENSRNOT00000004649	Capn8	ENSRNOG00000003468.8	13:100980587-101020665	2170	0.000624533	11.5985	0.0320284
ENSRNOT00000019108	Acad9	ENSRNOG00000014178.5	2:122782059-122805768	2517	0.000636598	-2.09031	0.0325658
ENSRNOT00000078005	Sugp1	ENSRNOG00000052111.1	16:21100923-21131795	2076	0.00064208	-2.34544	0.0327809
ENSRNOT00000022092	Ifrd2	ENSRNOG00000016150.5	8:116343095-116348314	1956	0.000643691	-2.35078	0.0328142
ENSRNOT00000068711	Klhl22	ENSRNOG00000001878.7	11:87677965-87718805	2562	0.000654041	-2.2222	0.0333087
ENSRNOT00000048332	RT1-Da	ENSRNOG00000032844.4	20:4127643-4132616	1192	0.00065559	3.26679	0.0333545
ENSRNOT00000042384	Robo1	ENSRNOG00000029614.5	11:9642412-10143317	4887	0.000657491	2.09714	0.0334347
ENSRNOT00000008057	C1d	ENSRNOG00000005982.6	14:100415667-100427260	2488	0.000678619	-2.09222	0.0343873
ENSRNOT00000035805	Ntmt1	ENSRNOG00000024809.6	3:9643046-9659630	1251	0.000687918	2.21775	0.0348095
ENSRNOT00000089564	NEWGENE_621351	ENSRNOG00000052925.1	4:29529853-29564435	4119	0.000719515	3.19927	0.0361412
ENSRNOT00000016798	Ints14	ENSRNOG00000012469.7	8:70447039-70471137	2268	0.000720779	-5.72685	0.036187
ENSRNOT00000016462	Pdp2	ENSRNOG00000012343.5	19:597426-601469	2116	0.000728027	2.15604	0.036444
ENSRNOT00000027233	B4gat1	ENSRNOG00000020110.4	1:220416017-220418240	1980	0.00073222	-3.02237	0.0366181
ENSRNOT00000084725	Exosc7	ENSRNOG00000060337.1	8:132204603-132229969	1042	0.00073654	-2.01931	0.0367983
ENSRNOT00000089292	NEWGENE_621351	ENSRNOG00000011292.6	4:31534224-31568806	4119	0.000764165	3.17206	0.0379202
ENSRNOT00000075306	LOC100912571	ENSRNOG00000049598.1	11:82886877-82893845	1593	0.000775306	2.29307	0.0383803
ENSRNOT00000060683	Stk11	ENSRNOG00000014287.6	7:12440750-12457513	3119	0.000784928	4.35409	0.0386887
ENSRNOT00000019720	Ephb6	ENSRNOG00000014367.6	4:70903252-70918514	4066	0.000786005	-2.84398	0.0386957
ENSRNOT00000022902	Prpf4b	ENSRNOG00000016705.7	17:30683639-30714410	4353	0.000790232	3.37518	0.0388197
ENSRNOT00000077435	Mia2	ENSRNOG00000005101.8	6:80220546-80286546	2397	0.000796343	4.21418	0.0390638
ENSRNOT00000034992	Ptcd2	ENSRNOG00000028403.5	2:29570537-29598277	1700	0.00080088	-3.06043	0.0392373
ENSRNOT00000010020	Dok1	ENSRNOG00000007412.4	4:113864214-113866674	1728	0.000801409	-3.59341	0.0392373
ENSRNOT00000001160	Vars1	ENSRNOG00000000867.6	20:4993743-5008262	3994	0.000801284	-2.91834	0.0392373
ENSRNOT00000068108	Clk3	ENSRNOG00000030126.5	8:62528224-62541959	1754	0.000802951	2.2165	0.0392567
ENSRNOT00000049725	Hif1a	ENSRNOG00000008292.6	6:96810906-96856052	3977	0.000823962	-2.13157	0.0401501
ENSRNOT00000025241	Drg1	ENSRNOG00000018590.5	14:83460539-83476568	1607	0.000826764	-2.18089	0.0402675
ENSRNOT00000047527	RT1-CE7	ENSRNOG00000031090.6	20:4694656-4698718	1568	0.000827618	3.54587	0.0402852
ENSRNOT00000002222	Get1	ENSRNOG00000001629.5	11:36497508-36511535	2500	0.000844743	-2.42417	0.0409682
ENSRNOT00000003369	Tom1l1	ENSRNOG00000002474.7	10:78173846-78219793	2281	0.000880838	-4.85377	0.0423759
ENSRNOT00000030837	Parl	ENSRNOG00000023271.7	11:84517367-84544462	1317	0.000882114	-2.35857	0.0424001
ENSRNOT00000045421	Klf16	ENSRNOG00000033694.3	7:12006709-12016524	2592	0.000882843	-2.75328	0.042412
ENSRNOT00000060168	Pls3	ENSRNOG00000027520.5	X:119030418-119124250	3071	0.000886614	6.10819	0.0425368
ENSRNOT00000025808	LOC103690016	ENSRNOG00000019082.5	1:67368383-67390141	4026	0.000909566	-3.98316	0.0433946
ENSRNOT00000016770	Ints4	ENSRNOG00000012552.6	1:162447679-162511355	3171	0.000911585	-2.13704	0.0434689
ENSRNOT00000065168	Mpped2	ENSRNOG00000004863.5	3:97721667-97896422	2312	0.000912573	-4.53595	0.0434774
ENSRNOT00000075444	AABR07031491.2	ENSRNOG00000049681.2	18:15738808-15780285	2168	0.000938563	-2.28639	0.0444475
ENSRNOT00000019267	Igf1r	ENSRNOG00000014187.6	1:128924965-129206516	4101	0.000947009	3.87372	0.0447649
ENSRNOT00000078249	Oxsm	ENSRNOG00000005993.6	15:10462105-10466021	2405	0.000955305	-4.10184	0.0450534
ENSRNOT00000008450	Ift27	ENSRNOG00000006440.5	7:119393383-119409710	1021	0.000956343	2.01596	0.0450816
ENSRNOT00000075292	Irf2bp2	ENSRNOG00000049900.1	19:59499875-59502161	1716	0.000960984	2.18269	0.0452173
ENSRNOT00000093571	Fbxl3	ENSRNOG00000059334.2	15:93647309-93667355	3431	0.000980172	-17.4522	0.045526
ENSRNOT00000070994	Rbm15	ENSRNOG00000047499.2	2:210081769-210088949	3286	0.000981733	7.78479	0.045526
ENSRNOT00000059565	Ankrd33b	ENSRNOG00000010888.7	2:84361060-84436912	1791	0.000980172	10.2578	0.045526
ENSRNOT00000029386	Samd10	ENSRNOG00000036719.4	3:177091456-177095597	2043	0.000981733	-9.07926	0.045526
ENSRNOT00000003699	Tada2a	ENSRNOG00000002757.7	10:71393691-71441389	2101	0.000972569	-3.15803	0.045526
