# Supplementary material for: Identification of Novel Mrna Isoforms Associated with Acute Heat Stress Response Using RNA-Sequencing Data in The Sprague-Dawley Rats
Source: Preprints.org preprint supplement (doi:10.20944/preprints202211.0380.v1), 2022-11-21
Supplement: Supplementary file 5 [file Table S5_Liver_novel_annotated.xlsx]

## Sheet: Title
Table S5. The novel differentially expressed transcripts (P < 0.001, FDR < 0.05 and |FC| > 2) length associated with annotated genes identified in liver under various heat stress conditions.

## Sheet: CT vs. H30
The novel differentially expressed transcripts (P < 0.001, FDR < 0.05 and |FC| > 2) length associated with annotated genes identified in liver in CT vs. H30.
Gene ID	Gene name	Position	Transcript length (bp*)	P-value	Fold change	FDR
ENSRNOG00000046889.3	Dbi	13:36147665-36156076	567	3.78476e-43	-2028.18	1.07322e-38
ENSRNOG00000012404.6	Thrsp	1:162385098-162385859	761	6.73123e-40	-1278.37	1.43155e-35
ENSRNOG00000030021.3	Ccl6	10:70797123-70802881	1473	1.16066e-32	-698.854	1.92769e-28
ENSRNOG00000014964.8	Hp	19:42096135-42101228	1739	2.01628e-27	-9.28524	1.31941e-23
ENSRNOG00000001148.6	Rplp0	12:46791344-46794804	1283	3.05114e-27	12.4677	1.85398e-23
ENSRNOG00000014806.7	Pnkd	9:81566021-81568532	676	2.94437e-26	-255.975	1.56547e-22
ENSRNOG00000054423.1	Pemt	10:46399222-46404801	349	1.23977e-24	-406.029	6.20386e-21
ENSRNOG00000009057.4	Sec62	2:116187619-116208110	3352	3.47762e-24	42.8273	1.64354e-20
ENSRNOG00000016961.4	Rps27	2:189572137-189573281	381	7.67812e-24	13.5508	3.43774e-20
ENSRNOG00000021125.8	Prdx5	1:222164442-222167594	982	5.15957e-23	-63.6007	2.1946e-19
ENSRNOG00000001049.7	Tpt1	15:57893479-57894512	334	3.19163e-22	1560.62	1.23413e-18
ENSRNOG00000019868.7	Psma5	2:211060869-211073714	624	7.42856e-21	32.0686	2.52776e-17
ENSRNOG00000045636.2	Fasn	10:109985403-109997391	8520	8.20305e-21	-179.756	2.68394e-17
ENSRNOG00000017418.5	Rps3	1:164440065-164441205	211	1.34992e-20	-13.9145	4.2532e-17
ENSRNOG00000006939.7	Ndufa7	7:18683515-18696330	511	2.64219e-20	-6.28057	8.02744e-17
ENSRNOG00000047023.2	Aldh1l1	4:123530637-123542040	586	6.49531e-20	-55.7306	1.84183e-16
ENSRNOG00000017595.7	Rsu1	17:80388678-80389239	492	9.83917e-19	24.2257	2.53639e-15
ENSRNOG00000012843.4	Aspg	6:136682125-136701674	2678	1.50549e-18	-53.2279	3.65915e-15
ENSRNOG00000007395.6	Baat	5:64763075-64777935	7595	2.63094e-18	-121.768	6.21698e-15
ENSRNOG00000038999.4	RT1-A1	20:5352411-5377175	403	2.72676e-18	-6.57903	6.26927e-15
ENSRNOG00000012843.4	Aspg	6:136682125-136701675	2679	3.16778e-18	-43.9251	7.09157e-15
ENSRNOG00000028884.4	Atp5mg	8:49221754-49227359	512	5.22426e-18	-39.0162	1.1378e-14
ENSRNOG00000009243.4	Oaf	8:47511246-47530367	2843	5.35e-18	-119.637	1.1378e-14
ENSRNOG00000002115.6	Sod1	11:30363243-30368989	819	6.71242e-18	8.65382	1.39273e-14
ENSRNOG00000046540.2	Ugt2b15	14:22517745-22534604	1892	8.34965e-18	-91.3489	1.69118e-14
ENSRNOG00000039528.3	Fam32a	16:19304519-19308887	2050	9.51802e-18	-5.18032	1.883e-14
ENSRNOG00000008465.6	Tmem176b	4:78450561-78455172	1429	3.00505e-17	-9.46836	5.80993e-14
ENSRNOG00000019551.5	Psmb6	10:57131355-57131941	197	3.45459e-17	-21.4672	6.44604e-14
ENSRNOG00000037911.2	LOC680227	X:74331363-74338119	1899	1.83532e-16	18.4196	3.00247e-13
ENSRNOG00000057623.1	Copb1	1:183695467-183696022	555	2.03588e-16	-12.1147	3.26774e-13
ENSRNOG00000008921.4	Dynll2	10:75262528-75270697	2467	5.85704e-16	-16.4805	8.74127e-13
ENSRNOG00000037911.2	LOC680227	X:74333682-74341524	4396	1.09633e-15	58.0644	1.60799e-12
ENSRNOG00000021079.4	Fxyd1	1:89484195-89488433	746	1.39723e-15	-5.7772	2.0146e-12
ENSRNOG00000013376.6	Mvd	19:55258904-55265065	1503	1.46676e-15	-14.8075	2.0796e-12
ENSRNOG00000007650.5	Cd63	7:3332742-3335590	916	1.52872e-15	-4.12966	2.13192e-12
ENSRNOG00000017447.5	Eif2s2	3:150395730-150412281	924	2.70015e-15	-17.4699	3.64225e-12
ENSRNOG00000056596.1	Alas1	8:114927625-114941070	2241	2.74018e-15	-306.853	3.64225e-12
ENSRNOG00000012748.4	Vamp8	4:100249759-100255143	1039	5.50669e-15	-2.67742	7.2069e-12
ENSRNOG00000014241.7	Ece1	5:156311470-156318671	2672	5.95982e-15	-9.15564	7.68176e-12
ENSRNOG00000012641.5	Sfr1	1:267506273-267509350	1305	8.25937e-15	20.3948	1.04868e-11
ENSRNOG00000000723.7	RT1-CE5	20:4955548-4956655	1107	9.2561e-15	30.9381	1.15795e-11
ENSRNOG00000003763.7	Prdx4	X:43497662-43513041	1057	1.87463e-14	-2.78513	2.3112e-11
ENSRNOG00000038366.5	Larp1b	2:127844544-127869981	1167	4.52018e-14	-142.101	5.26749e-11
ENSRNOG00000012216.7	Tgfbi	17:8399203-8412829	3077	4.84849e-14	-31.0934	5.49942e-11
ENSRNOG00000014522.5	Mlycd	19:52032875-52048793	2105	6.11928e-14	-6.19227	6.76053e-11
ENSRNOG00000000201.7	Gsta5	8:85553610-85560975	1411	8.08845e-14	-11.0679	8.70983e-11
ENSRNOG00000006779.6	Crot	4:22111298-22116294	1284	1.45481e-13	7.28653	1.50926e-10
ENSRNOG00000061100.1	Tmem150a	4:100217922-100223033	2512	1.50495e-13	-15.1823	1.54246e-10
ENSRNOG00000009438.7	Serpina6	6:127523905-127534299	1624	2.46442e-13	-87.0915	2.43774e-10
ENSRNOG00000005266.7	Amdhd1	7:34361467-34367046	3536	2.6429e-13	13.512	2.58424e-10
ENSRNOG00000007743.7	Mgst1	4:172119311-172135792	2154	3.25598e-13	3.48934	3.11217e-10
ENSRNOG00000007392.3	Atp6v1f	4:56744536-56747656	667	3.65098e-13	-38.5863	3.41302e-10
ENSRNOG00000009057.4	Sec62	2:116187617-116215775	3701	4.1771e-13	-3.48083	3.82088e-10
ENSRNOG00000001177.4	Acads	12:47254450-47263750	1803	4.53108e-13	-11.9131	4.10058e-10
ENSRNOG00000034116.6	Gk	X:54227021-54239016	3299	5.48693e-13	6.93671	4.86216e-10
ENSRNOG00000000658.7	Acacb	12:48127147-48130831	2422	7.29975e-13	-4.11875	6.20983e-10
ENSRNOG00000004494.5	Lta4h	7:34316283-34325388	663	9.70846e-13	14.8715	8.1707e-10
ENSRNOG00000000571.6	Psap	20:29852568-29856878	1713	9.79689e-13	-2.66711	8.1707e-10
ENSRNOG00000056457.1	Gpd1	7:141370473-141377972	2932	1.17793e-12	-713.178	9.72864e-10
ENSRNOG00000060825.1	Ccm2	14:86855903-86859424	1059	1.25157e-12	34.8033	1.02374e-09
ENSRNOG00000009788.6	Serpina4	6:127743861-127749749	1075	1.38951e-12	-113.784	1.12576e-09
ENSRNOG00000019811.5	LOC100362432	16:8349860-8350134	274	1.4444e-12	-7.09629	1.15241e-09
ENSRNOG00000003515.6	Ephx1	13:99271365-99300613	1789	1.56037e-12	-139.497	1.21779e-09
ENSRNOG00000048878.1	Smim24	7:11183374-11186275	697	1.65459e-12	-163.13	1.27959e-09
ENSRNOG00000021097.7	Hpn	1:89543860-89549677	453	1.732e-12	-9.36549	1.32739e-09
ENSRNOG00000002536.6	C1galt1c1	X:124921727-124926183	1325	2.32476e-12	-74.507	1.76576e-09
ENSRNOG00000004621.8	Rtn4	14:114152197-114174480	1873	3.05875e-12	26.765	2.3027e-09
ENSRNOG00000031612.3	Gls2	7:2605712-2621852	2533	4.16697e-12	-10.2254	3.02974e-09
ENSRNOG00000018691.7	Aurkaip1	5:173262318-173268484	4307	5.13346e-12	6.02965	3.66974e-09
ENSRNOG00000057626.1	Kif1b	5:165946107-165950350	612	5.48405e-12	-6.82093	3.88769e-09
ENSRNOG00000019294.3	Stk16	9:82411012-82414338	1578	6.56136e-12	-136.191	4.59878e-09
ENSRNOG00000059330.1	AABR07004549.1	1:147420485-147427835	3291	6.77187e-12	5.42639	4.68355e-09
ENSRNOG00000037911.2	LOC680227	X:74330154-74330812	658	7.28228e-12	6.93645	4.99593e-09
ENSRNOG00000002210.6	Hsd17b11	14:7058458-7104578	1835	7.56425e-12	-13.6118	5.14787e-09
ENSRNOG00000009488.4	Cyp7a1	5:19358714-19361267	2553	8.28721e-12	-5.23258	5.55106e-09
ENSRNOG00000031453.5	Manbal	3:153491140-153520738	1096	9.5153e-12	-7.42333	6.32389e-09
ENSRNOG00000018257.5	Hpx	1:170430202-170431090	379	1.07369e-11	-73.803	6.97232e-09
ENSRNOG00000003977.5	Dusp1	10:16971530-16973424	1894	1.21194e-11	12.543	7.8105e-09
ENSRNOG00000049771.1	Gstt1	20:13799054-13816546	1015	1.54106e-11	-7.20898	9.78331e-09
ENSRNOG00000005183.6	Rtf1	3:111478361-111523009	1036	2.18682e-11	-97.119	1.32879e-08
ENSRNOG00000009741.8	Cyp4a3	5:134484610-134484912	302	2.20262e-11	-18.9661	1.3289e-08
ENSRNOG00000009263.8	Ifi27	6:127327768-127334435	995	2.28576e-11	-6.91403	1.36935e-08
ENSRNOG00000015703.6	Hypk	3:113423681-113425063	618	2.46325e-11	-7.25401	1.45518e-08
ENSRNOG00000005513.7	Srsf5	6:104611013-104615303	2294	2.94129e-11	-71.4903	1.71379e-08
ENSRNOG00000003233.6	Serpinf2	10:62263904-62273119	3297	3.35032e-11	-5.14581	1.92573e-08
ENSRNOG00000000800.7	Man1a1	20:35257419-35260640	3221	3.56314e-11	14.6009	2.02075e-08
ENSRNOG00000001083.7	Kdelr2	12:13192450-13196063	1503	3.90678e-11	5.14368	2.20096e-08
ENSRNOG00000011300.8	AABR07031193.1	18:3930967-3941381	1445	6.51737e-11	-10.7792	3.50902e-08
ENSRNOG00000002911.5	Alb	14:19175796-19177539	680	6.58014e-11	-10.281	3.51684e-08
ENSRNOG00000058412.1	Morf4l1	8:97473936-97474160	224	6.61456e-11	-14.1536	3.51684e-08
ENSRNOG00000029668.4	Wfdc21	10:71047238-71053200	460	6.95182e-11	-8.99326	3.67319e-08
ENSRNOG00000034013.5	Acaca	10:71718001-71721985	2493	7.27657e-11	-4.63988	3.82105e-08
ENSRNOG00000059593.1	Cetn2	X:152927682-152932817	1310	7.95164e-11	-6.69588	4.09962e-08
ENSRNOG00000003232.4	Slc9a3r1	10:103712865-103730568	2094	8.12299e-11	-4.65601	4.16274e-08
ENSRNOG00000060597.1	Syf2	5:153269525-153277570	1394	9.32799e-11	-4.73877	4.72335e-08
ENSRNOG00000038001.3	Slc25a1	11:87204721-87207278	1510	9.90342e-11	-5.06687	4.98506e-08
ENSRNOG00000058393.1	Taf15	10:70720165-70721894	485	1.03593e-10	-3.14335	5.18383e-08
ENSRNOG00000019974.6	Uba52	16:20668862-20671127	612	1.05771e-10	-4.67734	5.26189e-08
ENSRNOG00000029179.5	Cyp2d3	7:123634265-123638805	1810	1.19004e-10	-104.596	5.85176e-08
ENSRNOG00000009884.6	Lgals1	7:120153072-120156291	618	1.40409e-10	-16.9262	6.56671e-08
ENSRNOG00000010298.6	Xbp1	14:85753021-85760404	4139	1.40491e-10	-4.31925	6.56671e-08
ENSRNOG00000016064.6	Tkt	16:6610239-6635877	3410	1.46968e-10	-12.1911	6.79479e-08
ENSRNOG00000043114.1	Tomm7	4:7835916-7842790	409	1.65909e-10	-5.19598	7.58801e-08
ENSRNOG00000013172.6	Nr1h3	3:80011623-80014169	507	1.77356e-10	-9.82395	8.01688e-08
ENSRNOG00000057626.1	Kif1b	5:165975189-165982371	773	1.9529e-10	-12.1197	8.69798e-08
ENSRNOG00000018529.7	Csnk1g2	7:11944944-11963288	2409	1.97008e-10	-13.5788	8.72877e-08
ENSRNOG00000004060.7	Calm1	6:124217045-124219949	343	2.05084e-10	-3.7215	8.94682e-08
ENSRNOG00000010478.7	LOC299282	6:128078640-128083030	3465	2.48641e-10	21.7471	1.07355e-07
ENSRNOG00000013201.5	Tex264	8:115360704-115388289	1573	2.49872e-10	-68.3102	1.07355e-07
ENSRNOG00000023856.3	Agxt	9:100281338-100291292	1600	2.59908e-10	-106.218	1.1e-07
ENSRNOG00000019277.8	Vdac3	16:74292390-74308910	1436	2.8097e-10	-23.5112	1.17743e-07
ENSRNOG00000012142.6	Glyat	1:229060025-229082039	3128	4.86502e-10	-3.02513	1.98972e-07
ENSRNOG00000054077.1	AABR07024870.1	16:20229722-20236310	2380	5.16958e-10	4.15932	2.08485e-07
ENSRNOG00000019276.7	Dele1	18:31404171-31410559	2191	5.17113e-10	19.8302	2.08485e-07
ENSRNOG00000003239.6	Cant1	10:107432498-107445564	2719	5.33005e-10	-16.871	2.12874e-07
ENSRNOG00000001795.8	Itgb5	11:70057362-70062518	936	5.38902e-10	11.1075	2.14224e-07
ENSRNOG00000018755.6	Acss2	3:151068377-151075872	1855	5.42143e-10	-2.39433	2.1451e-07
ENSRNOG00000048874.2	Gckr	6:26373444-26385970	3175	5.4728e-10	5.61409	2.1554e-07
ENSRNOG00000002342.6	Aldh3a2	10:47525484-47538443	2188	5.90045e-10	-9.35137	2.27124e-07
ENSRNOG00000003977.5	Dusp1	10:16970625-16973424	1942	6.39733e-10	8.62738	2.43105e-07
ENSRNOG00000024170.5	Phf5a	7:123095269-123101869	891	6.40133e-10	-3.44571	2.43105e-07
ENSRNOG00000004725.6	Cela1	7:142305642-142308128	597	6.52511e-10	7.92978	2.45613e-07
ENSRNOG00000005796.7	Ctnna1	18:28047269-28055969	2011	6.72386e-10	-87.2767	2.50874e-07
ENSRNOG00000003163.5	Sdhc	13:89497964-89505376	1136	6.92203e-10	12.6166	2.5714e-07
ENSRNOG00000046889.3	Dbi	13:36147663-36156076	569	7.17433e-10	5.9036	2.65354e-07
ENSRNOG00000050932.2	Pfdn4	3:168129889-168132793	708	7.37298e-10	16.3326	2.7152e-07
ENSRNOG00000013223.6	Fah	1:146727648-146736766	1086	7.79356e-10	-5.94576	2.84545e-07
ENSRNOG00000016592.6	Gnai2	8:116370729-116391307	2217	8.33744e-10	-7.71754	3.00533e-07
ENSRNOG00000011421.7	Smap2	5:139885250-139931410	2958	8.76958e-10	-71.3883	3.14776e-07
ENSRNOG00000017801.7	Atf4	7:121480455-121482781	1677	9.90358e-10	7.49257	3.52505e-07
ENSRNOG00000016892.4	Nr2f6	16:19769959-19778499	2845	1.06339e-09	-38.1053	3.75359e-07
ENSRNOG00000001211.4	Gatd3a	20:11244299-11252479	1359	1.07048e-09	-8.60539	3.76299e-07
ENSRNOG00000001889.7	Comt	11:86727700-86736868	2903	1.12543e-09	-90.7299	3.9399e-07
ENSRNOG00000053207.1	AABR07026125.1	16:64982381-64984767	2386	1.15798e-09	5.08242	4.02424e-07
ENSRNOG00000000658.7	Acacb	12:48132532-48136002	646	1.15899e-09	-68.1006	4.02424e-07
ENSRNOG00000016961.4	Rps27	2:189572175-189573357	419	1.22776e-09	-10.389	4.23008e-07
ENSRNOG00000049604.2	Mvk	12:47904168-47906004	853	1.22821e-09	-3.18713	4.23008e-07
ENSRNOG00000006508.6	Thnsl2	4:98976561-98995610	1468	1.32853e-09	-55.2501	4.55712e-07
ENSRNOG00000002389.5	Morf4l2	X:107394351-107403062	1957	1.34556e-09	-3.13975	4.59702e-07
ENSRNOG00000043105.3	Lyrm2	5:48047888-48050192	1577	1.56642e-09	-35.9765	5.3004e-07
ENSRNOG00000013454.4	Rala	17:49676083-49729128	2643	1.63829e-09	-31.0048	5.50861e-07
ENSRNOG00000010945.6	Ywhab	3:160391047-160399940	2758	1.66838e-09	-73.8251	5.58771e-07
ENSRNOG00000010128.7	Slc27a2	3:119039870-119052542	5942	1.779e-09	3.47442	5.9348e-07
ENSRNOG00000015441.7	Il4r	1:196956173-196967221	3257	1.93746e-09	-3.41744	6.41079e-07
ENSRNOG00000017032.5	Atp5f1a	18:74156532-74165153	2531	2.13455e-09	10.4468	6.98399e-07
ENSRNOG00000005987.5	Suox	7:3098226-3102154	2222	2.15466e-09	-6.27768	7.0228e-07
ENSRNOG00000049219.1	Rnf187	10:45273388-45279353	1956	2.36733e-09	-5.14212	7.62828e-07
ENSRNOG00000009921.6	Serpina3m	6:127808653-127816055	1816	2.70952e-09	-5.65113	8.69798e-07
ENSRNOG00000011706.6	Mbl1	16:18736092-18742193	1253	2.76074e-09	-8.88537	8.82906e-07
ENSRNOG00000019908.6	Lamtor2	2:187911526-187914911	583	2.91332e-09	19.7357	9.24752e-07
ENSRNOG00000036852.3	Pcbp2	7:144092743-144102145	2093	3.58069e-09	21.7462	1.1117e-06
ENSRNOG00000025768.6	Clk1	9:65296718-65306162	3119	3.74837e-09	4.21409	1.15953e-06
ENSRNOG00000002911.5	Alb	14:19176280-19177533	193	3.82969e-09	-3.92475	1.18039e-06
ENSRNOG00000032908.5	Acaa1a	8:128027348-128035563	1672	4.80649e-09	-5.64642	1.46335e-06
ENSRNOG00000018653.5	Pfdn1	18:29233971-29290491	1159	5.21673e-09	-26.3663	1.5793e-06
ENSRNOG00000016348.4	Tat	19:41675317-41686229	3593	5.49368e-09	7.2559	1.65724e-06
ENSRNOG00000050860.2	Abcb11	3:55532336-55540599	4117	5.54315e-09	11.6767	1.66625e-06
ENSRNOG00000006663.8	Usp2	8:48421791-48432526	3164	5.78046e-09	-8.56414	1.71936e-06
ENSRNOG00000019895.6	Nedd8	15:34340601-34352673	775	6.18388e-09	-4.11927	1.82026e-06
ENSRNOG00000016275.4	Ttr	18:15532543-15540177	1120	7.06562e-09	3.08822	2.06552e-06
ENSRNOG00000024213.6	Golim4	2:174320643-174323996	3005	7.96544e-09	33.6015	2.3048e-06
ENSRNOG00000020947.6	Egln2	1:83969456-83977733	2107	8.62386e-09	-9.50826	2.47846e-06
ENSRNOG00000021405.6	Cyp2c7	1:148067560-148069370	1810	8.8269e-09	4.72702	2.52827e-06
ENSRNOG00000016001.4	Chmp1a	19:56001722-56010015	2108	8.95488e-09	-44.9271	2.55632e-06
ENSRNOG00000013439.7	Cpn1	1:263733035-263750057	2021	9.2338e-09	14.4674	2.60967e-06
ENSRNOG00000013794.4	Rbp1	8:106449041-106470855	988	1.00123e-08	-2.71221	2.77438e-06
ENSRNOG00000047821.1	Smlr1	1:20856025-20877716	724	1.00881e-08	-3.54503	2.78632e-06
ENSRNOG00000004172.6	Pdk2	10:82850666-82852804	391	1.04368e-08	-5.65703	2.87329e-06
ENSRNOG00000013172.6	Nr1h3	3:80011623-80014145	415	1.1558e-08	-6.97479	3.16151e-06
ENSRNOG00000015591.5	Cndp2	18:81521958-81525928	1355	1.16556e-08	-3.36812	3.16783e-06
ENSRNOG00000011667.6	Fastk	4:7260503-7264915	2208	1.32808e-08	-8.02269	3.54164e-06
ENSRNOG00000007886.4	Orm1	5:79179416-79182882	1082	1.41921e-08	5.53253	3.7378e-06
ENSRNOG00000002393.7	Eprs	13:103331151-103354352	2544	1.44041e-08	-40.1299	3.78192e-06
ENSRNOG00000007213.5	Yars1	5:147375317-147403639	2533	1.66546e-08	-19.441	4.3327e-06
ENSRNOG00000007029.3	Dnaja1	5:57028466-57039379	7217	1.6877e-08	12.4013	4.36755e-06
ENSRNOG00000017420.7	Nudt6	2:124134303-124149646	1076	1.68913e-08	-51.4591	4.36755e-06
ENSRNOG00000019977.7	Ptprf	5:137036331-137049141	4439	1.71334e-08	3.8633	4.41672e-06
ENSRNOG00000049931.2	LOC288913	19:25355814-25358671	737	1.72472e-08	-17.5144	4.43262e-06
ENSRNOG00000024705.5	Rarres2	4:78205789-78208850	783	1.76407e-08	-4.86277	4.50653e-06
ENSRNOG00000004494.5	Lta4h	7:34313476-34320243	693	1.77904e-08	28.433	4.53117e-06
ENSRNOG00000003983.4	Pfdn2	13:89725842-89743848	1693	1.88585e-08	-2.80571	4.77463e-06
ENSRNOG00000017777.3	Ahcy	3:150586601-150603104	3307	1.9941e-08	-7.85627	5.004e-06
ENSRNOG00000011330.7	Ces2a	19:59133-63804	1217	2.18233e-08	-3.68754	5.4125e-06
ENSRNOG00000056753.1	Hectd2	1:255245356-255258451	6985	2.24989e-08	19.742	5.56384e-06
ENSRNOG00000024705.5	Rarres2	4:78205789-78208850	783	2.32277e-08	-5.02207	5.70168e-06
ENSRNOG00000016265.7	Acsl5	1:276240487-276277656	1294	2.35121e-08	-19.1658	5.73808e-06
ENSRNOG00000004813.5	Rtcb	7:23913724-23917830	345	2.35408e-08	-9.94687	5.73808e-06
ENSRNOG00000006675.5	Fabp1	4:99060182-99066977	3507	2.41208e-08	-167.048	5.86266e-06
ENSRNOG00000018333.5	Rbm6	8:116535402-116540589	530	2.52463e-08	-12.3652	6.10136e-06
ENSRNOG00000014078.7	Ndufb8	1:264298598-264303796	809	2.62528e-08	-2.79951	6.29098e-06
ENSRNOG00000002911.5	Alb	14:19185998-19188276	416	2.67144e-08	-8.82119	6.36574e-06
ENSRNOG00000016137.6	Rad23b	5:72103642-72142733	3853	2.72723e-08	-31.3275	6.46248e-06
ENSRNOG00000029886.3	Hba-a1	10:15602771-15603752	681	2.77042e-08	-12.0097	6.54657e-06
ENSRNOG00000049560.2	Glul	13:71331038-71340771	3040	3.01589e-08	-77.0831	7.06773e-06
ENSRNOG00000030625.6	Tf	8:111718951-111721282	262	3.05186e-08	-19.3212	7.13239e-06
ENSRNOG00000001415.6	Ap1s1	12:22665111-22676079	1348	3.17574e-08	-3.01882	7.38133e-06
ENSRNOG00000014204.7	Pacsin3	3:80072477-80081080	1851	3.19154e-08	-5.95271	7.39785e-06
ENSRNOG00000031479.4	Hdlbp	9:100554562-100568187	4234	3.20601e-08	-4.3306	7.41119e-06
ENSRNOG00000038370.4	AABR07034632.1	11:81711719-81712574	298	3.4091e-08	-5.88889	7.8593e-06
ENSRNOG00000016957.5	Igfbp2	9:80117658-80144804	1665	3.45792e-08	-14.7181	7.95033e-06
ENSRNOG00000019253.8	Bcar1	19:43932536-43967438	3185	3.70032e-08	-11.3989	8.46074e-06
ENSRNOG00000000185.5	Mpst	7:119626374-119631426	1480	3.852e-08	-4.67846	8.71506e-06
ENSRNOG00000014779.5	Pdcd4	1:274639893-274648309	1879	3.88557e-08	9.96347	8.76768e-06
ENSRNOG00000006865.6	Laptm4a	6:34042002-34060081	1530	4.3837e-08	-2.90294	9.78786e-06
ENSRNOG00000033609.4	Irx1	1:33910896-33916741	2360	4.54178e-08	-55.5431	1.00616e-05
ENSRNOG00000046307.1	Glyctk	8:114845811-114851334	4335	4.87888e-08	-2.99005	1.07803e-05
ENSRNOG00000001736.5	Bdh1	11:72576828-72581763	3256	5.54465e-08	7.78023	1.21254e-05
ENSRNOG00000047023.2	Aldh1l1	4:123521941-123542789	1706	5.62263e-08	22.8184	1.22644e-05
ENSRNOG00000007971.6	Wbp2	10:104629533-104637886	1895	5.82203e-08	-3.10476	1.25849e-05
ENSRNOG00000004814.6	Elob	10:13162445-13166238	866	5.82872e-08	-3.82326	1.25849e-05
ENSRNOG00000050360.2	Urad	12:9452619-9456970	4351	5.92234e-08	-2.32879	1.27546e-05
ENSRNOG00000021177.5	Cox8a	1:222466429-222466896	467	6.10707e-08	-2.50361	1.31193e-05
ENSRNOG00000045561.1	Uqcc3	1:225076300-225077100	711	6.88164e-08	-20.2531	1.4672e-05
ENSRNOG00000005428.8	Ctbp1	14:82761981-82789909	3145	6.90602e-08	-13.127	1.46872e-05
ENSRNOG00000059479.1	Adcy1	14:87401681-87403851	1522	7.01263e-08	7.97463	1.48404e-05
ENSRNOG00000050348.2	LOC684270	1:72490406-72509431	2296	7.89912e-08	-19.9049	1.64699e-05
ENSRNOG00000010673.7	Eral1	10:65288524-65291065	1512	7.98992e-08	-34.5133	1.65779e-05
ENSRNOG00000049604.2	Mvk	12:47909637-47920455	793	8.16445e-08	-6.20351	1.68464e-05
ENSRNOG00000013816.5	Cmas	4:176994066-177012533	1842	8.17873e-08	-21.874	1.68464e-05
ENSRNOG00000048989.3	Larp7	2:231873910-231882080	1476	8.29723e-08	-36.1739	1.70081e-05
ENSRNOG00000020607.6	Bckdha	1:82423276-82427430	1753	8.9272e-08	14.0066	1.81681e-05
ENSRNOG00000057823.1	Ubc	12:36638490-36640520	2030	9.12154e-08	5.8931	1.84314e-05
ENSRNOG00000029778.5	Maob	X:6532425-6533914	1489	9.63189e-08	8.44574	1.92342e-05
ENSRNOG00000019120.7	Hmgcs2	2:200475789-200480789	2226	9.69645e-08	123.06	1.93081e-05
ENSRNOG00000017777.3	Ahcy	3:150595261-150603104	368	1.03486e-07	-62.6627	2.04731e-05
ENSRNOG00000008047.7	Khk	6:26810564-26820959	1444	1.12335e-07	-4.39693	2.21722e-05
ENSRNOG00000012247.6	Rab7a	4:119910459-119959199	2119	1.15352e-07	-4.40169	2.2715e-05
ENSRNOG00000000184.6	Tmprss6	7:119685463-119689956	420	1.16029e-07	-7.93158	2.27956e-05
ENSRNOG00000000967.5	Aacs	12:36512384-36529040	2475	1.17061e-07	-3.98098	2.29454e-05
ENSRNOG00000005083.5	Rtfdc1	3:170471953-170473457	1504	1.23891e-07	7.35003	2.41726e-05
ENSRNOG00000019977.7	Ptprf	5:137036331-137041599	3685	1.32483e-07	-3.22755	2.56141e-05
ENSRNOG00000019772.5	Dnpep	9:82505527-82514399	1649	1.45421e-07	-5.71882	2.77996e-05
ENSRNOG00000018168.7	Klc4	9:16656467-16661464	1010	1.46054e-07	-3.14401	2.78581e-05
ENSRNOG00000012929.6	Wsb1	10:66586906-66603151	3904	1.46775e-07	6.03129	2.79328e-05
ENSRNOG00000021615.7	Mettl26	10:15241457-15242333	556	1.47716e-07	-9.55139	2.80493e-05
ENSRNOG00000029223.6	Prss32	10:13197535-13200636	591	1.56539e-07	-44.2073	2.95924e-05
ENSRNOG00000021097.7	Hpn	1:89543863-89549677	390	1.58515e-07	-4.6809	2.98333e-05
ENSRNOG00000062155.1	AC134224.2	1:221151826-221153278	1452	1.62671e-07	4.53651	3.0548e-05
ENSRNOG00000009982.6	Pnp	15:27875874-27879655	286	1.64672e-07	-26.4134	3.07879e-05
ENSRNOG00000052945.1	AABR07002969.1	1:90820615-90848662	459	1.68276e-07	-5.3936	3.13927e-05
ENSRNOG00000057626.1	Kif1b	5:165964266-165975183	5599	1.72486e-07	-3.39861	3.20376e-05
ENSRNOG00000016097.7	Kyat1	3:8752461-8785639	2082	1.75546e-07	-6.02517	3.2535e-05
ENSRNOG00000019369.6	Slx1b	1:198114520-198120080	2819	1.82821e-07	-15.0173	3.37885e-05
ENSRNOG00000021027.6	Dbp	1:101692289-101692823	534	1.84705e-07	-30.4937	3.39625e-05
ENSRNOG00000010658.6	LOC103691744	2:264267036-264277344	3546	1.84846e-07	7.15544	3.39625e-05
ENSRNOG00000007532.7	RGD1305178	3:9813911-9822199	1318	1.87586e-07	-46.5977	3.43917e-05
ENSRNOG00000002194.4	Coq2	14:10581113-10601095	2327	1.91394e-07	-24.5872	3.50144e-05
ENSRNOG00000001385.5	Plbd2	12:41599961-41619186	2233	1.93488e-07	-54.68	3.53216e-05
ENSRNOG00000010362.7	Anxa2	8:75723254-75723597	343	1.94732e-07	-17.8862	3.54725e-05
ENSRNOG00000005418.4	Trap1	10:11743564-11757743	1385	1.98269e-07	-6.77224	3.597e-05
ENSRNOG00000003809.7	Sat1	X:43626479-43629778	1177	1.98309e-07	68.1274	3.597e-05
ENSRNOG00000020480.5	Fads1	1:226245950-226249138	2497	2.14003e-07	-10.4669	3.85699e-05
ENSRNOG00000060229.1	Arf1	10:48690155-48735877	1531	2.19647e-07	-27.397	3.95035e-05
ENSRNOG00000034242.3	Vcp	5:58425174-58429979	3005	2.40562e-07	7.2475	4.27232e-05
ENSRNOG00000050214.2	Amt	8:117077372-117078648	1178	2.41211e-07	6.55606	4.27491e-05
ENSRNOG00000058249.1	Pgk1	X:77263269-77274294	774	2.41757e-07	-8.96739	4.27568e-05
ENSRNOG00000048164.2	Acad8	8:28018431-28045083	1140	2.57872e-07	-5.88577	4.52307e-05
ENSRNOG00000010872.5	Ckb	6:136142955-136145847	1439	2.78152e-07	-10.3401	4.83887e-05
ENSRNOG00000001269.6	Ppp1cc	12:39864300-39882030	2376	2.82534e-07	-8.08485	4.89508e-05
ENSRNOG00000036688.2	Arhgdia	10:109754003-109757551	1881	2.8551e-07	-3.72838	4.9366e-05
ENSRNOG00000007336.7	Churc1	6:99817430-99831614	373	2.86971e-07	-4.97619	4.9518e-05
ENSRNOG00000010887.6	RGD1309534	8:13838548-13861212	2512	2.97816e-07	-3.58999	5.11816e-05
ENSRNOG00000015020.7	Idh1	9:71882017-71903818	2276	3.01842e-07	-4.673	5.16648e-05
ENSRNOG00000009957.7	Slc25a13	4:31608249-31756964	1580	3.10226e-07	-6.36254	5.28871e-05
ENSRNOG00000001171.6	Coq5	12:47078521-47079629	1029	3.41098e-07	7.70975	5.73949e-05
ENSRNOG00000020775.8	Cyp2b2	1:83115233-83119579	718	3.63803e-07	-4.45912	6.05376e-05
ENSRNOG00000009086.6	Apcs	13:91426478-91427621	1033	3.64108e-07	-5.32375	6.05376e-05
ENSRNOG00000028384.5	Npepl1	3:172195084-172207692	2147	3.67605e-07	-3.96952	6.09587e-05
ENSRNOG00000008689.8	Cbx1	10:84671634-84677737	2260	3.84382e-07	8.0112	6.32476e-05
ENSRNOG00000003229.8	Tspan7	X:13261534-13279026	1654	3.95706e-07	17.4869	6.49851e-05
ENSRNOG00000028063.4	Tmem38b	5:70665428-70675065	2217	4.11204e-07	14.2975	6.74001e-05
ENSRNOG00000002212.6	Hsd17b13	14:7113343-7129706	2985	4.22039e-07	-9.36333	6.89136e-05
ENSRNOG00000038883.4	LOC294154	20:7331316-7364037	3025	4.23986e-07	-3.77469	6.9096e-05
ENSRNOG00000020194.7	Hes6	9:98549685-98551608	1529	4.26429e-07	-3.86821	6.9174e-05
ENSRNOG00000028498.5	Wdr1	14:77022576-77023743	1167	4.26895e-07	5.30273	6.9174e-05
ENSRNOG00000031022.5	LOC108348287	18:1505139-1505581	442	4.34995e-07	58.4063	7.03509e-05
ENSRNOG00000004327.8	Ddc	14:91905918-91996780	5140	4.43134e-07	-6.3291	7.13958e-05
ENSRNOG00000006082.6	Rmdn2	6:2230680-2231838	1158	4.61152e-07	3.74934	7.39556e-05
ENSRNOG00000045668.2	Ifnar2	11:31546834-31559830	2432	4.80315e-07	53.2566	7.68044e-05
ENSRNOG00000018289.6	Park7	5:167988384-168000111	900	5.03508e-07	-2.02194	8.02115e-05
ENSRNOG00000051235.1	C2	20:4542339-4560898	2487	5.436e-07	-19.4258	8.59544e-05
ENSRNOG00000016150.5	Ifrd2	8:116343085-116348320	1972	5.53461e-07	-32.4001	8.73514e-05
ENSRNOG00000015969.7	Rpf1	2:252368328-252374784	907	5.643e-07	38.6307	8.88971e-05
ENSRNOG00000047714.2	Tmem37	13:36094491-36101165	1105	5.68676e-07	-2.82202	8.94209e-05
ENSRNOG00000001396.7	Mospd3	12:22164948-22169260	1559	5.74017e-07	-4.20967	8.9763e-05
ENSRNOG00000012290.4	Gchfr	3:110975794-110979965	767	6.06143e-07	-2.28029	9.43169e-05
ENSRNOG00000052802.1	Aldoa	1:198228298-198229941	1040	6.10209e-07	3.90587	9.47261e-05
ENSRNOG00000017558.6	Tubb2a	17:31498028-31498669	641	6.32314e-07	6.21357	9.76231e-05
ENSRNOG00000019710.6	Tm9sf1	15:34314644-34322161	2296	6.62545e-07	-19.2157	0.000101189
ENSRNOG00000052604.1	LOC100361907	13:56759245-56764071	337	6.71834e-07	-6.52041	0.000102423
ENSRNOG00000010958.5	Prdx3	1:282238277-282240287	1548	6.77658e-07	9.06264	0.000102942
ENSRNOG00000019372.6	Pc	1:219846010-219859848	2944	6.97793e-07	-5.86591	0.000105442
ENSRNOG00000018691.7	Aurkaip1	5:173262318-173268484	4304	7.17619e-07	2.95272	0.00010824
ENSRNOG00000018454.7	Apoe	1:80614128-80616823	350	7.70558e-07	-6.53405	0.000115203
ENSRNOG00000023593.7	Upf2	17:76277650-76287225	1247	7.78831e-07	-15.8391	0.000116236
ENSRNOG00000000304.7	Cd164	20:46259557-46262812	3255	7.96311e-07	5.66207	0.000118016
ENSRNOG00000021882.6	Tmed9	17:9559853-9562811	1988	7.97715e-07	10.8123	0.000118019
ENSRNOG00000042237.3	Tm6sf2	16:21092307-21096528	1238	8.17157e-07	-3.62862	0.000120476
ENSRNOG00000020715.7	Ddb1	1:226677978-226683360	1537	8.55442e-07	-4.8499	0.000125252
ENSRNOG00000015518.7	Rbp4	1:256812923-256813752	479	8.84572e-07	-6.73737	0.000129073
ENSRNOG00000017729.7	Psmg2	18:63394899-63409602	1193	8.89603e-07	-5.39998	0.000129585
ENSRNOG00000047931.2	Tmsb4x	X:28593284-28595402	721	9.23676e-07	-2.96389	0.000133861
ENSRNOG00000010389.6	Ndrg2	15:28305636-28313881	2232	9.30883e-07	-8.73722	0.000134676
ENSRNOG00000011979.6	Mrps24	14:85947762-85951935	832	9.34242e-07	-7.46538	0.000134932
ENSRNOG00000059016.1	Tspan12	4:48852821-48900278	2029	9.57984e-07	2.64562	0.000137428
ENSRNOG00000012911.5	Erlin1	1:263810382-263832706	2655	9.68826e-07	-3.90661	0.000138749
ENSRNOG00000004726.7	Mapkapk2	13:47785143-47788577	1961	9.84833e-07	15.5537	0.000140805
ENSRNOG00000006787.6	Dhcr24	5:126164576-126192034	4790	9.92494e-07	-31.1145	0.000141662
ENSRNOG00000025936.5	Rpl6	12:40877573-40879259	1686	1.03824e-06	-4.09226	0.000147449
ENSRNOG00000058186.1	Errfi1	5:167951857-167967668	6321	1.04293e-06	16.7602	0.000147868
ENSRNOG00000055579.1	Tmbim6	7:141053864-141070270	2390	1.05802e-06	-2.12181	0.000149759
ENSRNOG00000021031.7	Grn	10:90379272-90383217	2341	1.06105e-06	4.06147	0.000149938
ENSRNOG00000033262.3	Reep6	7:12240054-12246828	2148	1.09145e-06	-3.41707	0.000153978
ENSRNOG00000004327.8	Ddc	14:91905918-91963824	4634	1.12546e-06	13.5798	0.000158513
ENSRNOG00000001333.6	Azgp1	12:19195228-19206301	6282	1.13182e-06	-14.1569	0.000158883
ENSRNOG00000000165.8	Pfkfb1	X:23092038-23139844	2100	1.13611e-06	-31.0185	0.000159222
ENSRNOG00000015911.7	Lrp5	1:218844220-218850626	981	1.13921e-06	-37.4309	0.000159394
ENSRNOG00000006302.4	Gclc	8:85058838-85097618	3407	1.14807e-06	-23.3074	0.000160369
ENSRNOG00000051190.2	AABR07015507.1	14:60060036-60069886	289	1.15358e-06	-3.6752	0.000160875
ENSRNOG00000008331.7	Washc4	7:26309276-26311607	2331	1.19151e-06	5.03035	0.000165541
ENSRNOG00000003524.4	Lrrc59	10:82352335-82367047	2856	1.19287e-06	-10.5251	0.000165541
ENSRNOG00000010352.5	Dnajc3	15:104221942-104229706	4137	1.19857e-06	3.77935	0.000166061
ENSRNOG00000017571.5	Ndufa2	18:29585670-29587784	584	1.21837e-06	-5.00604	0.00016853
ENSRNOG00000020377.6	Cideb	15:34439448-34444244	1715	1.2804e-06	-2.44915	0.000175117
ENSRNOG00000002389.5	Morf4l2	X:107394394-107403063	3224	1.29408e-06	5.73011	0.000176703
ENSRNOG00000060229.1	Arf1	10:45563540-45579194	952	1.31844e-06	-6.56838	0.000178881
ENSRNOG00000047986.2	Sult2a1	1:76721328-76723026	559	1.38608e-06	-3.84638	0.000187758
ENSRNOG00000004009.6	Xpnpep2	X:134956307-134970321	2434	1.39422e-06	-9.45261	0.000188262
ENSRNOG00000020255.6	Sars1	2:211219647-211222808	1320	1.4379e-06	7.38963	0.00019324
ENSRNOG00000012840.7	Sparc	10:40742387-40764219	2109	1.44436e-06	-2.47908	0.000193802
ENSRNOG00000019491.6	Stard10	1:166432870-166458423	2208	1.46794e-06	-2.55836	0.000196347
ENSRNOG00000001142.3	Prkab1	12:46316235-46326793	2058	1.47268e-06	-15.3911	0.000196671
ENSRNOG00000021164.7	Stip1	1:222274129-222275357	706	1.50007e-06	-5.55888	0.00019939
ENSRNOG00000000438.5	Rnf5	20:4495415-4497600	634	1.53627e-06	-2.55732	0.000203883
ENSRNOG00000006019.4	G0s2	13:112003944-112005068	1124	1.54592e-06	6.05389	0.000204844
ENSRNOG00000021053.8	Lsr	1:89382761-89385285	2067	1.55927e-06	5.27683	0.000206291
ENSRNOG00000013201.5	Tex264	8:115360704-115387706	1426	1.61423e-06	-4.22416	0.000211916
ENSRNOG00000031092.6	Rock1	18:1285547-1318828	2093	1.63815e-06	-66.5645	0.000214724
ENSRNOG00000013201.5	Tex264	8:115360704-115388284	1415	1.71623e-06	-3.8479	0.000221209
ENSRNOG00000053306.1	Washc1	9:113933994-113936870	1168	1.77432e-06	-33.363	0.00022835
ENSRNOG00000011891.6	Atp6v1b2	16:22326527-22331140	1555	1.82977e-06	-28.7784	0.000235131
ENSRNOG00000010895.6	Tmem30a	8:87221447-87228312	3545	1.83534e-06	3.30892	0.000235491
ENSRNOG00000056596.1	Alas1	8:114927625-114933486	1522	1.84117e-06	-3.75871	0.000235883
ENSRNOG00000018568.6	Rab5c	10:88621923-88645388	1900	1.89243e-06	-9.71066	0.000242086
ENSRNOG00000014475.4	Slc31a1	5:78222465-78251557	3653	1.96868e-06	-3.59341	0.000251462
ENSRNOG00000010673.7	Eral1	10:65288524-65291070	1517	1.99171e-06	6.36794	0.000253641
ENSRNOG00000061857.1	Mgst2	2:140708396-140727383	486	2.02332e-06	-2.00268	0.000257283
ENSRNOG00000007949.5	Rgn	X:1837642-1848987	743	2.04714e-06	-54.2971	0.000259923
ENSRNOG00000014399.6	Aamp	9:81560835-81566096	2169	2.08406e-06	-10.7816	0.00026343
ENSRNOG00000010725.3	Cpa1	4:57957075-57959116	452	2.1031e-06	7.32215	0.00026505
ENSRNOG00000015205.6	Cyb5a	18:81694656-81715558	505	2.11115e-06	-2.23298	0.000265671
ENSRNOG00000016552.6	Hmgcs1	2:52427538-52445268	3496	2.13595e-06	-8.42091	0.000267999
ENSRNOG00000018487.3	Slc3a2	1:224906553-224912650	1881	2.21378e-06	-4.45311	0.000276767
ENSRNOG00000016497.5	Bloc1s5	17:26808329-26833254	1789	2.23166e-06	-10.6852	0.000278365
ENSRNOG00000013408.5	Npas2	9:46078448-46081889	1611	2.2974e-06	21.4969	0.000284784
ENSRNOG00000059479.1	Adcy1	14:87401399-87404782	3383	2.35691e-06	5.99805	0.000290579
ENSRNOG00000056189.1	AABR07044364.2	20:3306817-3307262	445	2.36151e-06	11.3551	0.000290726
ENSRNOG00000020660.7	Cfl1	1:220869765-220872209	575	2.38539e-06	-13.0396	0.000293117
ENSRNOG00000016589.7	Mlf2	4:157452592-157457251	1510	2.38782e-06	-3.93537	0.000293117
ENSRNOG00000015768.4	Nat8f5	4:117525432-117526831	1399	2.45992e-06	-4.31048	0.000300393
ENSRNOG00000006924.7	Tmem125	5:137370576-137373203	2399	2.46122e-06	-4.25653	0.000300393
ENSRNOG00000032780.4	Mrpl58	10:103955684-103962529	1176	2.4922e-06	-38.7379	0.000302438
ENSRNOG00000020667.7	Shisa5	8:117793250-117795975	1548	2.58689e-06	-12.9304	0.000312591
ENSRNOG00000013454.4	Rala	17:49676078-49729135	2655	2.59384e-06	7.08406	0.000312987
ENSRNOG00000053210.1	Zc3h11a	13:50196004-50229309	9029	2.62405e-06	19.975	0.000316183
ENSRNOG00000010776.7	Atp13a1	16:21364083-21369764	1621	2.64156e-06	-4.99134	0.000317511
ENSRNOG00000006653.5	Slc38a4	7:138459503-138463704	2860	2.64254e-06	42.5867	0.000317511
ENSRNOG00000014766.5	Galt	5:58144976-58148008	1574	2.73983e-06	13.185	0.000327352
ENSRNOG00000009928.6	Bckdhb	8:91654193-91656330	687	2.77711e-06	8.17545	0.000330413
ENSRNOG00000057194.1	Tars2	2:197860974-197878170	2524	2.81146e-06	-6.96664	0.000332803
ENSRNOG00000015866.5	Hint2	5:59150343-59152749	839	2.81453e-06	-9.02811	0.000332803
ENSRNOG00000007114.6	Psma6	6:76198816-76205600	820	2.82066e-06	108.81	0.000332803
ENSRNOG00000014475.4	Slc31a1	5:78222465-78251557	3653	2.87393e-06	-3.56064	0.000337683
ENSRNOG00000017123.5	B2m	3:114087175-114093317	1946	2.89628e-06	-4.59008	0.000339372
ENSRNOG00000011287.6	Minpp1	1:251052297-251071565	2083	2.90297e-06	4.65123	0.000339687
ENSRNOG00000047503.2	Apoc3	8:50529321-50530683	309	2.94133e-06	-10.3	0.000343669
ENSRNOG00000004659.5	Creld2	7:129812716-129819643	1423	2.95112e-06	-60.017	0.000343669
ENSRNOG00000010958.5	Prdx3	1:282238290-282251257	1964	2.95316e-06	-9.77683	0.000343669
ENSRNOG00000012559.6	Man1b1	3:2547940-2569054	3727	3.03979e-06	-23.4997	0.000352786
ENSRNOG00000022392.3	Hspb8	12:45916857-45920570	3713	3.04498e-06	16.1881	0.000352906
ENSRNOG00000010989.8	Ipo5	15:106291386-106293392	1548	3.05471e-06	-38.4755	0.000353241
ENSRNOG00000019918.3	Coasy	10:88992431-88996681	2089	3.06032e-06	-3.84147	0.000353241
ENSRNOG00000014419.7	Brd7	19:19692450-19701495	1098	3.08657e-06	8.26031	0.000354826
ENSRNOG00000017871.7	Sidt2	8:50231856-50244215	2316	3.10536e-06	-34.7007	0.000356505
ENSRNOG00000007114.6	Psma6	6:76188029-76205600	1187	3.11043e-06	-5.57807	0.000356605
ENSRNOG00000011931.7	Smarca2	1:244708538-244783737	2679	3.11883e-06	-8.27215	0.000357087
ENSRNOG00000014485.5	Pdcd6	1:31576182-31591857	1539	3.16856e-06	-6.2291	0.000361807
ENSRNOG00000018358.4	Nt5dc2	16:7220435-7221484	544	3.22987e-06	-6.23432	0.000367821
ENSRNOG00000004517.8	Igf1	7:28414202-28417731	350	3.28645e-06	-5.16102	0.000373764
ENSRNOG00000009019.6	Slc6a6	4:123638618-123647266	4478	3.32105e-06	8.36896	0.000377194
ENSRNOG00000033245.5	Mug2	4:154267623-154276370	611	3.37908e-06	-4.1743	0.000381497
ENSRNOG00000004405.5	Pigr	13:47564162-47593486	5275	3.3858e-06	-4.19053	0.000381497
ENSRNOG00000047986.2	Sult2a1	1:76527132-76531965	3293	3.38585e-06	2.99776	0.000381497
ENSRNOG00000020345.6	Slc25a42	16:20962174-20985299	2931	3.40519e-06	-34.2861	0.00038317
ENSRNOG00000020763.8	Snrnp70	1:101367437-101368460	945	3.4443e-06	-17.514	0.000387059
ENSRNOG00000036678.4	Aspscr1	10:109851643-109883338	1635	3.50213e-06	-15.7497	0.000392004
ENSRNOG00000019813.7	Ppp4c	1:198219021-198225773	1406	3.77104e-06	-4.33443	0.000419893
ENSRNOG00000015772.5	RGD1560341	18:51218276-51220217	1941	3.91589e-06	-9.46053	0.000433751
ENSRNOG00000017032.5	Atp5f1a	18:74156529-74165157	2538	3.99383e-06	-4.35726	0.000441235
ENSRNOG00000039848.5	Ak6	2:30674177-30676495	838	4.05392e-06	6.37043	0.000446386
ENSRNOG00000017235.6	Atp6v0d1	19:37481769-37525798	1633	4.13974e-06	-4.59691	0.000453818
ENSRNOG00000027888.6	Cmss1	11:45304067-45330487	976	4.30333e-06	-9.63886	0.000469936
ENSRNOG00000011849.6	Ndufs1	9:69919500-69925985	1218	4.33253e-06	3.26052	0.000472518
ENSRNOG00000047986.2	Sult2a1	1:76565847-76575093	9246	4.49654e-06	2.50302	0.000487904
ENSRNOG00000005290.5	Ywhae	10:63884165-63921984	2185	4.53559e-06	-31.1056	0.000489643
ENSRNOG00000003233.6	Serpinf2	10:62263904-62270816	2710	4.57189e-06	2.02271	0.000492871
ENSRNOG00000010233.5	Cald1	4:62288992-62291387	2395	4.58288e-06	3.40819	0.000492871
ENSRNOG00000013974.7	Fahd2a	3:120005312-120011382	816	4.89036e-06	-52.6906	0.00052198
ENSRNOG00000020817.5	Cyp2a1	1:83724352-83729836	5484	4.96161e-06	11.4786	0.000528921
ENSRNOG00000036742.3	Uqcrc2	1:190555132-190585734	1868	5.14349e-06	-6.63615	0.000545833
ENSRNOG00000006965.6	Aff4	10:38771257-38774607	2704	5.16902e-06	-2.74881	0.000546919
ENSRNOG00000017977.4	Smpd1	1:170383596-170387528	2398	5.23501e-06	-64.662	0.000553213
ENSRNOG00000007971.6	Wbp2	10:104629533-104632493	1654	5.28597e-06	6.28525	0.000557906
ENSRNOG00000016427.6	Letm1	14:82266924-82269998	3074	5.43219e-06	-17.416	0.000571213
ENSRNOG00000011970.5	Tmem82	5:160169465-160174698	2766	5.44812e-06	-33.9001	0.000572181
ENSRNOG00000059883.1	LOC100912578	3:74226406-74229066	2660	5.46908e-06	2.03529	0.000573356
ENSRNOG00000048723.1	Pros1	7:1280807-1288480	2942	5.54499e-06	18.8083	0.000580205
ENSRNOG00000018730.7	Nectin2	1:80631383-80637000	1485	5.7165e-06	15.9411	0.000595223
ENSRNOG00000007048.5	Rap1b	7:60850331-60861015	2595	5.7473e-06	16.9797	0.000597698
ENSRNOG00000014454.5	Ap1m1	16:19288263-19303889	2087	5.8435e-06	-7.94114	0.000606221
ENSRNOG00000001222.7	Ube2g2	20:11700084-11701738	1654	5.9696e-06	9.03425	0.000617044
ENSRNOG00000003330.4	Acsf2	10:82284718-82287413	1689	6.0234e-06	8.13988	0.000621097
ENSRNOG00000048878.1	Smim24	7:11183364-11185459	539	6.03759e-06	-26.7735	0.000621806
ENSRNOG00000018457.6	Ptpa	3:8982062-9012585	2510	6.06071e-06	-5.07088	0.000623339
ENSRNOG00000014256.3	Foxa3	1:79920692-79922642	1950	6.08578e-06	7.65985	0.0006245
ENSRNOG00000019573.5	Lcat	19:37913013-37916850	1721	6.10343e-06	-18.6258	0.000625486
ENSRNOG00000015519.6	Ces1d	19:15218577-15239821	1072	6.11009e-06	-4.73562	0.000625486
ENSRNOG00000010658.6	LOC103691744	2:264266227-264277344	1659	6.11971e-06	7.06966	0.000625719
ENSRNOG00000011093.6	Ssna1	3:2489041-2490475	898	6.1346e-06	-2.48428	0.000625737
ENSRNOG00000033426.4	Cdc37	8:22160235-22173822	2315	6.18846e-06	-3.38655	0.00062972
ENSRNOG00000015144.5	Ist1	19:41979252-41990953	2172	6.20333e-06	-11.8691	0.000630127
ENSRNOG00000000314.7	Sec63	20:47530934-47563223	5101	6.20727e-06	-26.7207	0.000630127
ENSRNOG00000054140.1	Myl6	7:2906136-2908864	651	6.27415e-06	-2.00305	0.000636157
ENSRNOG00000004284.4	Btg1	7:37813774-37815748	1974	6.32391e-06	14.4868	0.000639677
ENSRNOG00000017123.5	B2m	3:114087160-114093404	2048	6.3902e-06	4.64274	0.000645615
ENSRNOG00000019506.7	Dnajb2	9:82436457-82444677	2974	6.46227e-06	-7.32307	0.00065135
ENSRNOG00000001842.7	Mrps35	4:181434790-181448890	577	6.54399e-06	-50.981	0.000658586
ENSRNOG00000020134.7	Upf1	16:20841526-20845213	1654	6.55232e-06	-3.81668	0.000658586
ENSRNOG00000017481.6	Sucla2	15:55461662-55516954	2126	6.72048e-06	-3.86372	0.000671014
ENSRNOG00000036852.3	Pcbp2	7:144081392-144091548	621	6.83244e-06	-48.6067	0.000681394
ENSRNOG00000032908.5	Acaa1a	8:128035735-128038350	2297	6.88756e-06	-2.24763	0.000686087
ENSRNOG00000003977.5	Dusp1	10:16971530-16973424	1634	6.95409e-06	12.3361	0.000691904
ENSRNOG00000014204.7	Pacsin3	3:80072413-80081080	1852	7.00465e-06	-4.04401	0.000694497
ENSRNOG00000013201.5	Tex264	8:115360704-115361417	713	7.0249e-06	10.3158	0.000695694
ENSRNOG00000008689.8	Cbx1	10:84656694-84677737	2818	7.26541e-06	-3.15768	0.000716177
ENSRNOG00000059479.1	Adcy1	14:87397838-87398549	711	7.37487e-06	16.3791	0.000724449
ENSRNOG00000018796.5	Herpud1	19:11046392-11051145	1885	7.45947e-06	-3.70772	0.000731914
ENSRNOG00000010133.7	Bpgm	4:61912144-61940704	1648	7.50576e-06	-3.73903	0.000734761
ENSRNOG00000006924.7	Tmem125	5:137370576-137374457	3251	7.54262e-06	-4.36668	0.000736973
ENSRNOG00000034013.5	Acaca	10:71700562-71721985	3090	7.54568e-06	-4.36088	0.000736973
ENSRNOG00000018584.6	LOC100359583	9:93548706-93549442	736	7.69531e-06	7.80482	0.000749946
ENSRNOG00000004100.5	Trib1	7:99957273-99962641	2842	7.74017e-06	-4.35774	0.00075298
ENSRNOG00000001142.3	Prkab1	12:46316301-46326793	2090	7.74498e-06	-3.06848	0.00075298
ENSRNOG00000007793.6	Pnrc1	5:48501381-48504813	2005	7.86098e-06	2.64948	0.000761647
ENSRNOG00000011258.7	Masp2	5:165415129-165417216	902	8.04562e-06	-2.82624	0.000776882
ENSRNOG00000030445.3	Ormdl3	10:86545908-86551896	2039	8.2376e-06	-2.41701	0.000788827
ENSRNOG00000045743.2	Etnppl	2:235738388-235761011	5526	8.23883e-06	14.7134	0.000788827
ENSRNOG00000042344.1	Smim22	10:10766315-10767361	493	8.2435e-06	-7.03754	0.000788827
ENSRNOG00000004793.6	Ncln	7:11081518-11091599	3039	8.35087e-06	34.6385	0.000796413
ENSRNOG00000008945.6	Nans	5:62109305-62126494	2070	8.50947e-06	-38.5536	0.000808818
ENSRNOG00000009681.8	Flot2	10:65304899-65329322	2647	8.57987e-06	-5.10819	0.000813494
ENSRNOG00000002878.6	Afm	14:19077811-19080846	1290	8.76006e-06	-9.32369	0.000826175
ENSRNOG00000060723.1	AABR07071244.1	8:106596903-106602956	1134	8.81856e-06	-3.33784	0.000830771
ENSRNOG00000020688.6	Ccdc51	8:117820510-117830868	1558	8.94846e-06	-10.024	0.000841145
ENSRNOG00000017441.8	Tpm3	2:189429999-189451385	2155	9.02062e-06	-3.44597	0.000846058
ENSRNOG00000021316.4	Tmem98	10:68173361-68184320	1460	9.08833e-06	-51.8394	0.00085147
ENSRNOG00000055245.1	LOC103690477	8:131603408-131603925	251	9.32445e-06	-4.68085	0.000870485
ENSRNOG00000005615.6	Gadd45a	4:97782508-97784842	1244	9.35729e-06	-3.77151	0.000870904
ENSRNOG00000050360.2	Urad	12:9446752-9455673	694	9.3595e-06	-2.99847	0.000870904
ENSRNOG00000058522.1	Fam214a	8:81928635-81941552	3496	9.52767e-06	6.25686	0.000884835
ENSRNOG00000002818.7	Eftud2	10:90932067-90932547	480	9.57635e-06	-17.8406	0.000885881
ENSRNOG00000017843.6	Polr3k	3:177374704-177379008	1072	9.74656e-06	-12.8049	0.000899273
ENSRNOG00000058497.1	Fdxr	10:103817703-103826552	1945	9.76932e-06	-24.5617	0.000900397
ENSRNOG00000002997.6	Slc9a3r2	10:14003254-14004830	1378	9.81504e-06	32.0912	0.000903632
ENSRNOG00000010233.5	Cald1	4:62257777-62291489	3911	9.91829e-06	-3.22334	0.00091215
ENSRNOG00000039862.2	Cldn12	4:25683038-25692547	3556	9.95199e-06	-31.8644	0.000914261
ENSRNOG00000007092.7	Fgb	2:182027244-182035107	2531	1.00149e-05	3.50842	0.000918059
ENSRNOG00000009406.7	Tm9sf4	3:148680412-148689970	2494	1.02445e-05	10.2578	0.000937084
ENSRNOG00000060825.1	Ccm2	14:86813013-86859424	1866	1.03313e-05	-4.12061	0.000942161
ENSRNOG00000016379.7	Jtb	2:189595413-189595899	486	1.03783e-05	8.89845	0.000945255
ENSRNOG00000007029.3	Dnaja1	5:57028466-57039379	5529	1.05757e-05	10.3022	0.000961176
ENSRNOG00000015768.4	Nat8f5	4:117524736-117527486	2182	1.05878e-05	-6.34387	0.000961253
ENSRNOG00000001333.6	Azgp1	12:19196454-19206258	6924	1.06216e-05	2.10608	0.000963298
ENSRNOG00000015953.6	Oaz2	8:71215992-71229790	1830	1.06418e-05	-4.93487	0.000964094
ENSRNOG00000047945.2	Cyp2c12	1:258709725-258711266	1541	1.0734e-05	2.72276	0.000971417
ENSRNOG00000050653.1	AABR07072562.1	17:69614383-69627763	401	1.08603e-05	-9.56891	0.000981805
ENSRNOG00000003858.6	Atp6ap2	X:11136734-11138251	1517	1.10864e-05	15.5537	0.000995516
ENSRNOG00000055984.1	Adrm1	3:175548132-175552947	1482	1.10939e-05	-7.38159	0.000995516
ENSRNOG00000013961.6	Ghitm	16:14369464-14382642	3466	1.13614e-05	-32.3261	0.0010163
ENSRNOG00000020947.6	Egln2	1:83969456-83977318	2069	1.14247e-05	-8.75156	0.00101982
ENSRNOG00000018998.6	Yipf3	9:17115280-17120677	2470	1.14623e-05	-5.77987	0.00102103
ENSRNOG00000014907.5	Aldh8a1	1:16910083-16930550	4053	1.19147e-05	5.22565	0.00105911
ENSRNOG00000019425.5	Gabarapl2	19:44164868-44165397	224	1.20537e-05	-3.21108	0.00106924
ENSRNOG00000054017.1	LOC100912564	17:44522119-44522475	356	1.21744e-05	-51.2784	0.00107882
ENSRNOG00000036693.2	Slc25a10	10:109668839-109675060	3603	1.23488e-05	-19.0279	0.00109087
ENSRNOG00000016478.7	Eif5a	10:56529487-56531615	409	1.24594e-05	-24.4348	0.00109949
ENSRNOG00000028668.6	Slc28a2	3:114376991-114380296	3131	1.25167e-05	6.69755	0.00110341
ENSRNOG00000037627.4	Trappc1	10:55924946-55926783	800	1.27988e-05	-2.43091	0.00112245
ENSRNOG00000001980.6	Ugt2b35	14:22574154-22591461	3497	1.29062e-05	3.15724	0.0011307
ENSRNOG00000021438.3	Tuba1c	7:140716050-140720043	370	1.29203e-05	-14.5465	0.00113078
ENSRNOG00000021233.6	Itpa	3:123216597-123221269	837	1.29982e-05	9.51366	0.00113643
ENSRNOG00000017941.8	Optn	17:77211092-77218501	3231	1.35822e-05	8.01242	0.00118263
ENSRNOG00000054945.1	AABR07015081.2	14:46630376-46657585	340	1.36101e-05	-115.745	0.00118384
ENSRNOG00000010807.5	Cox6c	7:74723176-74731416	263	1.41521e-05	-84.0056	0.00122473
ENSRNOG00000009977.6	Thrap3	5:144178242-144185572	2291	1.43896e-05	5.55777	0.00124199
ENSRNOG00000018755.6	Acss2	3:151067975-151075872	1985	1.43954e-05	30.8698	0.00124199
ENSRNOG00000008798.7	Pipox	10:64951597-64964863	2698	1.44941e-05	-35.2785	0.00124671
ENSRNOG00000020578.8	Ceacam1	1:82327951-82331299	2279	1.45188e-05	2.4487	0.00124758
ENSRNOG00000008320.3	Lypla1	5:14559211-14561121	1910	1.46645e-05	3.61016	0.00125882
ENSRNOG00000000304.7	Cd164	20:46259428-46262911	3483	1.47396e-05	21.7788	0.001264
ENSRNOG00000007091.8	Ly6e	7:116356328-116359863	1101	1.47639e-05	-2.4404	0.0012648
ENSRNOG00000013443.8	Tm9sf3	1:260464928-260518007	6398	1.4813e-05	-6.08713	0.00126753
ENSRNOG00000015774.5	Mreg	9:79489816-79545333	2891	1.48256e-05	2.62209	0.00126753
ENSRNOG00000048848.2	Ccdc9	1:78214145-78219617	1176	1.49298e-05	-4.80052	0.00127516
ENSRNOG00000002636.7	Abat	10:7101451-7127571	967	1.4956e-05	-11.0033	0.00127612
ENSRNOG00000049497.2	Eif6	3:151356863-151363213	1326	1.52225e-05	-4.39304	0.00129626
ENSRNOG00000003269.3	Atp6v0e1	10:16769665-16792953	921	1.54148e-05	-3.40546	0.00131132
ENSRNOG00000008845.5	Pdrg1	3:148487055-148493271	1241	1.55934e-05	-3.05552	0.00132387
ENSRNOG00000060931.1	Rspry1	19:10769201-10788150	2290	1.57861e-05	28.0612	0.00133852
ENSRNOG00000001990.4	Ugt2b10	14:22824902-22828276	3374	1.60498e-05	11.0097	0.00135451
ENSRNOG00000001172.7	Rnf10	12:47103308-47138128	4105	1.62068e-05	-20.9311	0.0013664
ENSRNOG00000059015.1	Triobp	7:120311157-120321912	868	1.63036e-05	-3.91272	0.0013732
ENSRNOG00000011414.5	Psmc3	3:79879484-79882478	1181	1.6562e-05	7.13347	0.00138946
ENSRNOG00000001795.8	Itgb5	11:70057379-70067173	1089	1.68386e-05	-9.15089	0.0014085
ENSRNOG00000004526.7	Cox7a2l	6:6695788-6709815	1121	1.69963e-05	-10.9316	0.0014189
ENSRNOG00000020941.4	Psenen	1:89015821-89017363	879	1.71803e-05	33.7426	0.00143286
ENSRNOG00000019630.7	Hacl1	16:7734891-7758452	4809	1.72851e-05	-11.9794	0.00143877
ENSRNOG00000054077.1	AABR07024870.1	16:20229722-20236310	1342	1.76938e-05	-2.35693	0.00146705
ENSRNOG00000017901.6	Acy3	1:219233749-219237100	1331	1.77434e-05	-5.88203	0.00146973
ENSRNOG00000020578.8	Ceacam1	1:82327951-82344385	5014	1.83502e-05	9.39106	0.00151128
ENSRNOG00000010029.6	Ubald2	10:105396418-105397643	1225	1.83644e-05	5.01539	0.00151128
ENSRNOG00000018358.4	Nt5dc2	16:7220433-7221714	696	1.83694e-05	3.20116	0.00151128
ENSRNOG00000001809.7	LOC681544	11:81616795-81623510	5495	1.9158e-05	62.9204	0.00157161
ENSRNOG00000015654.8	Ghr	2:53300334-53313956	325	1.95492e-05	-4.4179	0.00159907
ENSRNOG00000047306.2	Stap2	9:11067436-11070138	869	2.00161e-05	-2.00459	0.00163568
ENSRNOG00000000571.6	Psap	20:29852568-29856878	1710	2.01199e-05	-2.09645	0.00164101
ENSRNOG00000019891.6	Sgta	7:11537545-11538909	1364	2.03431e-05	3.75371	0.00165763
ENSRNOG00000014525.5	Hspd1	9:61680524-61683967	2047	2.03946e-05	7.44015	0.00165865
ENSRNOG00000012404.6	Thrsp	1:162379838-162386231	6393	2.04229e-05	4.17179	0.00165937
ENSRNOG00000014501.6	Zfp638	4:115683302-115685484	513	2.04813e-05	-19.6343	0.00166252
ENSRNOG00000046345.2	Rpn1	4:119997233-120018717	2289	2.08739e-05	-9.42576	0.00169278
ENSRNOG00000047606.2	Bcl2a1	8:96551244-96559511	862	2.12444e-05	-18.64	0.0017211
ENSRNOG00000000184.6	Tmprss6	7:119659328-119674176	2312	2.15308e-05	-2.05741	0.00173777
ENSRNOG00000017751.8	Arl6ip1	1:187770155-187772650	1748	2.16412e-05	6.75413	0.00174502
ENSRNOG00000020715.7	Ddb1	1:226657560-226683357	4246	2.17911e-05	-4.36934	0.00175351
ENSRNOG00000051854.1	Enpep	2:233667252-233675857	992	2.18083e-05	2.81479	0.00175351
ENSRNOG00000061058.1	Csde1	2:205524866-205525297	431	2.1941e-05	-2.97775	0.00176251
ENSRNOG00000019120.7	Hmgcs2	2:200452623-200480790	4887	2.20861e-05	3.43014	0.00177249
ENSRNOG00000001391.6	Sdsl	12:41636993-41647209	1382	2.23391e-05	-16.2888	0.00178974
ENSRNOG00000014654.2	LOC691807	2:227096478-227097249	771	2.27627e-05	8.8319	0.00181651
ENSRNOG00000004245.7	Mgst3	13:85604581-85622357	330	2.29528e-05	-2.28946	0.00182678
ENSRNOG00000009446.4	Rxra	3:6277174-6303406	9019	2.29559e-05	-5.85079	0.00182678
ENSRNOG00000000723.7	RT1-CE5	20:4892876-4940259	707	2.31453e-05	-34.0326	0.00184014
ENSRNOG00000020902.5	G6pc3	10:90134192-90138429	1475	2.35884e-05	-18.4821	0.00186838
ENSRNOG00000012613.7	F13b	13:56614035-56625419	3548	2.38324e-05	9.44623	0.0018842
ENSRNOG00000024278.4	Rbm42	1:89099229-89103892	632	2.40274e-05	46.6355	0.0018961
ENSRNOG00000049900.1	Irf2bp2	19:59497017-59503529	6512	2.42189e-05	3.2662	0.00190943
ENSRNOG00000030019.4	Atp1a1	2:204003740-204032076	3691	2.49062e-05	-9.89135	0.00195999
ENSRNOG00000005825.8	Lyz2	7:60335966-60341280	1208	2.51604e-05	-17.6636	0.00197816
ENSRNOG00000009795.8	Nfib	5:100433260-100439854	6594	2.52577e-05	-3.49586	0.00198398
ENSRNOG00000014097.6	Psmd7	19:39639375-39644113	1356	2.53402e-05	16.5776	0.00198862
ENSRNOG00000000133.7	Txndc15	17:9430880-9441634	1018	2.54153e-05	-5.24495	0.00199268
ENSRNOG00000049385.1	Adamtsl4	2:197803157-197807408	2158	2.61507e-05	-15.1806	0.0020428
ENSRNOG00000005513.7	Srsf5	6:104611020-104615303	2029	2.63461e-05	4.16099	0.00205618
ENSRNOG00000025592.5	Tspan31	7:70355642-70356306	389	2.66069e-05	-5.72687	0.00207463
ENSRNOG00000013741.7	Ube2d3	2:240654135-240657405	3270	2.6717e-05	25.905	0.00207986
ENSRNOG00000019456.6	Kars	19:44212151-44231174	2213	2.67228e-05	-28.2477	0.00207986
ENSRNOG00000000664.4	Tpst2	12:50343077-50346720	633	2.69557e-05	5.11738	0.00209415
ENSRNOG00000021177.5	Cox8a	1:222466574-222469002	601	2.7355e-05	-3.65273	0.00211744
ENSRNOG00000055408.1	Gcat	7:120267080-120269451	1154	2.75488e-05	9.035	0.00212856
ENSRNOG00000021824.5	Dnajb1	19:24747135-24750907	2274	2.75798e-05	-40.8777	0.00212902
ENSRNOG00000061176.1	Nudt3	20:7155747-7208501	2265	2.78229e-05	-5.08706	0.00214266
ENSRNOG00000014254.3	Cpt1a	1:218626295-218629680	2219	2.79164e-05	-15.4805	0.00214722
ENSRNOG00000020811.7	Il6r	2:189205698-189215983	3570	2.80477e-05	-2.71375	0.0021529
ENSRNOG00000028668.6	Slc28a2	3:114376991-114380296	3305	2.80662e-05	7.28918	0.0021529
ENSRNOG00000038258.4	Upb1	20:14178542-14193793	2682	2.82046e-05	-2.32257	0.00215962
ENSRNOG00000028668.6	Slc28a2	3:114371508-114379588	1058	2.82363e-05	4.02221	0.0021601
ENSRNOG00000059202.1	AABR07021988.1	13:101725982-101735057	3312	2.90561e-05	18.5236	0.00221089
ENSRNOG00000010655.6	Mttp	2:243366170-243407608	4007	2.91517e-05	-3.50005	0.00221618
ENSRNOG00000002896.7	Prdx6	13:79076995-79088181	1495	2.91815e-05	-2.16576	0.00221647
ENSRNOG00000015989.5	Mrpl32	17:53102513-53105410	798	2.95291e-05	-2.73016	0.00224087
ENSRNOG00000047781.2	Slc25a23	9:9994011-10003964	2926	2.98434e-05	-37.4804	0.00226068
ENSRNOG00000027784.4	Tsku	1:163317145-163328704	2739	3.00154e-05	-4.17441	0.00227169
ENSRNOG00000045892.1	Cfl2	6:75759135-75762117	2528	3.01844e-05	6.296	0.00228067
ENSRNOG00000014565.4	Lcmt1	1:193383841-193391638	539	3.08192e-05	-3.86747	0.00232014
ENSRNOG00000047945.2	Cyp2c12	1:258716743-258725489	258	3.13503e-05	-3.591	0.00234973
ENSRNOG00000006331.4	Elovl5	8:85220978-85287451	2699	3.16013e-05	2.26355	0.00236437
ENSRNOG00000005397.5	Maea	14:82664246-82697673	2152	3.20368e-05	-4.47917	0.00239316
ENSRNOG00000032202.3	Creb3l3	7:11490761-11499315	2046	3.20991e-05	-5.29007	0.00239529
ENSRNOG00000008411.6	Sec23b	3:138718349-138757117	2702	3.31753e-05	-11.1077	0.00246695
ENSRNOG00000001979.7	Rcan1	11:32539684-32550658	5036	3.42207e-05	4.94064	0.00253361
ENSRNOG00000008064.7	Naga	7:123562817-123564504	1271	3.44235e-05	5.80437	0.0025442
ENSRNOG00000007395.6	Baat	5:64776931-64777411	480	3.46017e-05	3.99903	0.00255293
ENSRNOG00000006623.6	Cd302	3:46327220-46361294	1574	3.4814e-05	-3.33537	0.00256637
ENSRNOG00000010410.6	Serpina3c	6:127993155-128003445	5754	3.49598e-05	-2.40708	0.00257489
ENSRNOG00000052968.1	Hnrnpa3	3:62487092-62491356	4264	3.51811e-05	22.5397	0.00258894
ENSRNOG00000013704.5	Cps1	9:74219932-74236359	11035	3.55525e-05	8.58225	0.00260951
ENSRNOG00000011414.5	Psmc3	3:79876935-79882478	1787	3.57266e-05	-21.5338	0.00262002
ENSRNOG00000017170.5	Med4	15:55406511-55416817	1355	3.67933e-05	-8.51575	0.00268667
ENSRNOG00000008857.7	Adamts10	7:18435665-18439012	1258	3.79741e-05	-9.07036	0.00276577
ENSRNOG00000003253.4	Qdpr	14:70177437-70178292	855	3.83168e-05	9.68846	0.00278358
ENSRNOG00000034013.5	Acaca	10:71663774-71721985	3886	3.85484e-05	-3.96051	0.00279776
ENSRNOG00000029179.5	Cyp2d3	7:123625589-123630105	1734	3.85778e-05	-2.24121	0.00279776
ENSRNOG00000019946.5	Gmppa	9:82634811-82639909	1394	3.88227e-05	-2.6011	0.00281313
ENSRNOG00000017254.6	Nsun2	1:36297402-36304888	2074	3.89838e-05	-3.95123	0.00282239
ENSRNOG00000047179.3	Aplp2	8:32298524-32328839	3290	3.9635e-05	-5.7091	0.00286223
ENSRNOG00000007629.7	Sf3a3	5:142721271-142722366	329	4.05673e-05	-3.40862	0.0029246
ENSRNOG00000058105.1	Hbb	1:168972209-168972731	413	4.07573e-05	-4.60933	0.00293332
ENSRNOG00000022657.3	Tmem97	10:65811455-65820720	1423	4.08839e-05	-3.812	0.00293995
ENSRNOG00000021240.4	Atrn	3:123536321-123537923	1602	4.1144e-05	3.02038	0.00295615
ENSRNOG00000019383.7	Tef	7:123034038-123058607	4157	4.19787e-05	-27.5202	0.0030085
ENSRNOG00000029360.5	Serinc1	20:38965714-38967553	1839	4.20952e-05	2.62109	0.00301177
ENSRNOG00000053234.1	Cnot3	1:64130876-64140804	2317	4.31972e-05	-19.992	0.00308543
ENSRNOG00000005413.5	Creb3l1	3:80892280-80896979	1400	4.45867e-05	21.952	0.00317667
ENSRNOG00000024115.4	C6	2:54460343-54513839	2140	4.49687e-05	-6.56842	0.00319853
ENSRNOG00000009779.5	Krt8	7:143596467-143603937	1999	4.57454e-05	-4.18109	0.00324834
ENSRNOG00000003229.8	Tspan7	X:13261548-13279026	1640	4.61711e-05	-5.55703	0.0032731
ENSRNOG00000019383.7	Tef	7:123043460-123058607	4208	4.62258e-05	-27.3925	0.00327426
ENSRNOG00000016873.6	Msrb2	17:86066829-86078704	301	4.69901e-05	-22.5564	0.00331185
ENSRNOG00000036693.2	Slc25a10	10:109665277-109675060	4237	4.73393e-05	-22.8811	0.0033337
ENSRNOG00000049484.3	Atp9a	3:165412796-165477826	2485	4.78035e-05	-8.9609	0.0033636
ENSRNOG00000008137.6	Cdk18	13:48893398-48920312	3084	4.81027e-05	-6.14384	0.00337627
ENSRNOG00000017730.6	Psmd1	9:93143997-93155077	983	4.82076e-05	-44.829	0.00338085
ENSRNOG00000004909.7	Cnot2	7:59526076-59547191	2451	4.86378e-05	9.78471	0.00340261
ENSRNOG00000019618.7	Hdac3	18:31072957-31082101	1619	4.87002e-05	-3.48555	0.00340381
ENSRNOG00000009550.7	Sqle	7:99617859-99625874	2095	4.90189e-05	6.23351	0.00342083
ENSRNOG00000005256.5	Zc3h15	3:71020413-71020652	239	5.0284e-05	-8.53239	0.00349513
ENSRNOG00000026775.6	Pmpca	3:3840534-3844244	2688	5.08459e-05	23.2537	0.00352519
ENSRNOG00000045941.3	Susd6	6:104437077-104475259	523	5.14561e-05	-11.5393	0.00356459
ENSRNOG00000047945.2	Cyp2c12	1:258752245-258767029	3100	5.17421e-05	-4.63137	0.00358149
ENSRNOG00000045524.2	Slc39a3	7:11544993-11553373	3739	5.19985e-05	-7.20756	0.00359631
ENSRNOG00000034116.6	Gk	X:54227021-54259074	3683	5.2308e-05	5.81545	0.00361184
ENSRNOG00000034116.6	Gk	X:54227021-54241476	3572	5.24166e-05	16.3469	0.0036164
ENSRNOG00000058186.1	Errfi1	5:167951857-167967668	14898	5.26791e-05	3.0576	0.00363157
ENSRNOG00000013223.6	Fah	1:146713620-146727552	5503	5.30553e-05	-2.27031	0.00365159
ENSRNOG00000048834.2	Plin3	9:10773789-10782199	2518	5.38569e-05	-2.84462	0.00369778
ENSRNOG00000000165.8	Pfkfb1	X:23092038-23139762	1892	5.42274e-05	-5.93116	0.00371679
ENSRNOG00000027797.4	Nit2	11:45462300-45477390	5358	5.42526e-05	-8.89896	0.00371679
ENSRNOG00000017914.4	Cavin3	1:170316881-170317722	841	5.42648e-05	3.45776	0.00371679
ENSRNOG00000047023.2	Aldh1l1	4:123515525-123520330	3236	5.46064e-05	-2.28846	0.00373718
ENSRNOG00000010580.8	Acot7	5:169357039-169450219	1976	5.48065e-05	-6.56942	0.00374786
ENSRNOG00000018153.6	Rbm5	8:116502936-116509313	1688	5.49791e-05	-6.7074	0.00375363
ENSRNOG00000011200.3	Bhmt	2:23236238-23239717	1322	5.50847e-05	2.95351	0.00375481
ENSRNOG00000012329.6	Saraf	16:61735180-61753497	1906	5.56131e-05	-47.9532	0.00377871
ENSRNOG00000011573.6	Csad	7:143781518-143784723	1556	5.66021e-05	-2.61985	0.00383294
ENSRNOG00000048088.2	Mest	4:58057539-58064963	2494	5.7099e-05	3.26962	0.00386117
ENSRNOG00000020583.7	Fcgrt	1:101086269-101096149	2257	5.75741e-05	-7.40791	0.00388712
ENSRNOG00000013110.6	Nudt2	5:57845813-57860658	910	5.82184e-05	-21.3537	0.0039275
ENSRNOG00000014064.5	Ctsh	8:97439160-97451885	739	5.83009e-05	-3.84885	0.00392995
ENSRNOG00000008459.4	Anapc13	8:111107353-111115774	620	5.8796e-05	-6.51299	0.00396019
ENSRNOG00000000653.6	Nr5a2	13:53750469-53799956	3341	5.90605e-05	-8.56391	0.00397486
ENSRNOG00000006997.8	App	11:24424916-24441065	1427	5.94686e-05	3.40793	0.003996
ENSRNOG00000019598.8	Vegfa	9:17340325-17355685	4344	5.99949e-05	3.82555	0.004025
ENSRNOG00000000853.7	Aif1	20:5161332-5163252	677	6.04267e-05	-2.52199	0.00405078
ENSRNOG00000002045.7	Anxa3	14:14385283-14409249	797	6.175e-05	-27.4839	0.00412648
ENSRNOG00000033245.5	Mug2	4:154277141-154280232	507	6.22988e-05	-2.77529	0.00415385
ENSRNOG00000026905.6	Ppm1g	6:26534637-26537295	1216	6.23061e-05	-2.53943	0.00415385
ENSRNOG00000003147.8	Sqstm1	10:35709876-35716411	4234	6.32052e-05	4.78693	0.0042072
ENSRNOG00000001598.6	Usp16	11:27126679-27130341	690	6.34125e-05	5.38252	0.0042177
ENSRNOG00000007862.6	Acat1	8:58166675-58178983	1892	6.39109e-05	13.8384	0.00424753
ENSRNOG00000013304.5	Arg1	1:21525490-21539121	4617	6.40281e-05	5.35033	0.00424868
ENSRNOG00000053583.1	Mapk3	1:198192772-198198981	1787	6.53152e-05	-3.22021	0.00431725
ENSRNOG00000005360.8	Dhrs7b	10:47065736-47111232	1489	6.60595e-05	-12.9036	0.00435629
ENSRNOG00000016789.6	Actr1b	9:43267044-43276763	3230	6.65154e-05	-4.26376	0.00437957
ENSRNOG00000016991.5	Arl2bp	19:10753432-10763248	2321	6.66114e-05	-7.42726	0.0043825
ENSRNOG00000046493.1	Pnpo	10:84874926-84881210	2070	6.67583e-05	-7.95123	0.00438876
ENSRNOG00000050570.1	Nrbp1	6:26486822-26497389	2197	6.69815e-05	-4.55574	0.00440004
ENSRNOG00000015970.7	Tbc1d13	3:8705172-8718400	3221	6.74644e-05	-6.27382	0.00442776
ENSRNOG00000002643.3	Ugdh	14:44495288-44504325	2878	6.75076e-05	-11.4414	0.00442776
ENSRNOG00000011573.6	Csad	7:143781518-143782696	1178	6.79558e-05	7.75542	0.00445029
ENSRNOG00000014064.5	Ctsh	8:97439160-97451885	739	6.85283e-05	-3.88584	0.00448433
ENSRNOG00000032959.3	Adh7	2:243513083-243516880	1615	6.95387e-05	15.6466	0.00454346
ENSRNOG00000019834.6	Hsp90ab1	9:17817720-17823291	2630	6.97202e-05	10.937	0.00455182
ENSRNOG00000012266.4	Zcchc17	5:148535662-148577292	1955	6.9854e-05	-2.52549	0.00455706
ENSRNOG00000003773.6	Hmox2	10:10990572-11035484	1345	7.1117e-05	-9.45183	0.00462125
ENSRNOG00000014918.5	Klrg1	4:155039505-155040598	1093	7.11638e-05	20.8199	0.00462125
ENSRNOG00000028616.6	Pck1	3:171213914-171219887	3267	7.19121e-05	4.56212	0.00466272
ENSRNOG00000010697.2	Hadh	2:236353444-236395193	1785	7.2124e-05	-5.48317	0.0046729
ENSRNOG00000006807.7	Aldob	5:64812059-64818991	614	7.22465e-05	-11.3503	0.00467728
ENSRNOG00000054172.1	Ctnnb1	8:129623026-129628388	2377	7.28893e-05	-2.37365	0.00471172
ENSRNOG00000001928.8	Il1rap	11:77483056-77492675	1816	7.45253e-05	8.04898	0.00479923
ENSRNOG00000030391.4	Ei24	8:39257460-39271198	987	7.46466e-05	-6.07523	0.00480341
ENSRNOG00000012378.7	Dbnl	14:86041851-86044808	1725	7.49142e-05	9.87225	0.00481699
ENSRNOG00000030019.4	Atp1a1	2:204003737-204013477	2051	7.53284e-05	-3.17332	0.00483997
ENSRNOG00000045765.1	MGC94207	7:117786206-117788697	1889	7.57607e-05	-25.8944	0.00486039
ENSRNOG00000009550.7	Sqle	7:99609201-99625874	2907	7.61022e-05	-9.29205	0.00487863
ENSRNOG00000013975.7	Acat2l1	1:48024978-48026545	1248	7.68429e-05	-2.97511	0.0049224
ENSRNOG00000007990.5	Adipor2	4:151410862-151448715	5459	7.69574e-05	-6.71477	0.00492603
ENSRNOG00000020982.6	LOC687780	1:221420371-221421831	866	7.70217e-05	-19.1378	0.00492644
ENSRNOG00000002940.7	Ankrd17	14:19396633-19409873	1314	7.73399e-05	-26.3534	0.00494307
ENSRNOG00000027797.4	Nit2	11:45462302-45477390	5356	7.75143e-05	-8.17561	0.0049505
ENSRNOG00000006399.7	Synj2bp	6:105224163-105261579	5843	7.84283e-05	-3.62863	0.00499014
ENSRNOG00000000504.6	Fance	20:7895009-7906146	1932	7.93678e-05	-4.9148	0.00503861
ENSRNOG00000009888.5	Timm8b	8:55037715-55039128	519	8.01468e-05	-4.05143	0.00508427
ENSRNOG00000019374.6	Csk	8:62405688-62424776	2820	8.05134e-05	-10.6097	0.00510372
ENSRNOG00000033245.5	Mug2	4:154228708-154243309	5689	8.11734e-05	10.5708	0.00514173
ENSRNOG00000019189.7	Acat2	1:47972350-47977407	446	8.16652e-05	-8.27255	0.00516903
ENSRNOG00000057626.1	Kif1b	5:165946096-165950724	716	8.20711e-05	-3.84071	0.00519086
ENSRNOG00000053615.1	Mrpl50	5:64784169-64789323	1795	8.23072e-05	-11.7519	0.0051999
ENSRNOG00000016088.8	Cdk10	19:56024891-56032605	1658	8.48869e-05	-7.5227	0.00534098
ENSRNOG00000004740.7	Mmadhc	3:35783298-35801614	1727	8.49676e-05	-2.52728	0.00534098
ENSRNOG00000009029.7	Nptn	8:63379050-63445907	2262	8.79954e-05	-26.5036	0.00550857
ENSRNOG00000018693.7	Asgr1	10:56662175-56667171	2334	8.81132e-05	-6.46677	0.00551154
ENSRNOG00000007336.7	Churc1	6:99817430-99831614	509	8.83894e-05	4.4812	0.00552476
ENSRNOG00000028366.7	Gphn	6:101858061-101859169	1108	8.85459e-05	3.28657	0.00553048
ENSRNOG00000004291.6	Cltc	10:74014321-74015865	1544	8.88925e-05	7.27999	0.00554805
ENSRNOG00000019813.7	Ppp4c	1:198219011-198225773	1416	8.93313e-05	40.8447	0.00556727
ENSRNOG00000049484.3	Atp9a	3:165412796-165421997	635	8.95737e-05	-3.7084	0.00557829
ENSRNOG00000009552.6	Serinc3	3:160017189-160019593	2404	9.01063e-05	6.6334	0.00560735
ENSRNOG00000019752.5	Slc29a1	9:17791299-17799010	2044	9.1441e-05	-4.1245	0.00566968
ENSRNOG00000020775.8	Cyp2b2	1:83111845-83119579	1385	9.16221e-05	-4.63573	0.00567676
ENSRNOG00000019423.5	Dvl1	5:173295951-173308020	3348	9.18245e-05	-3.04352	0.00568187
ENSRNOG00000016936.5	Nadk	5:172986290-173001944	575	9.1838e-05	-4.69407	0.00568187
ENSRNOG00000010363.6	Mrps23	10:75528978-75536767	1324	9.25469e-05	-3.81324	0.00571326
ENSRNOG00000026616.4	Ndufb2	4:67378166-67385271	482	9.267e-05	-21.6006	0.00571671
ENSRNOG00000004553.7	Cox20	13:96220363-96224923	4560	9.30419e-05	4.46159	0.00573549
ENSRNOG00000012582.5	Eif4ebp1	16:68954521-68968278	1214	9.40605e-05	-7.21806	0.00578296
ENSRNOG00000001440.4	Mdh2	12:23940872-23946143	1448	9.40839e-05	5.82141	0.00578296
ENSRNOG00000002701.6	Hgd	11:65983213-66034573	13825	9.51209e-05	4.76941	0.00584249
ENSRNOG00000009598.7	Ncaph2	7:130326599-130342493	2112	9.56789e-05	-5.98162	0.00586829
ENSRNOG00000005308.4	Tmx2	3:72072233-72080403	2521	9.65405e-05	-4.65822	0.0059126
ENSRNOG00000009275.4	Kpnb1	10:85093826-85096930	3104	9.68523e-05	6.48246	0.00592743
ENSRNOG00000028498.5	Wdr1	14:76989916-77023743	2914	9.76096e-05	-6.07209	0.00596948
ENSRNOG00000010658.6	LOC103691744	2:264264529-264267572	2957	9.90547e-05	7.7139	0.00604916
ENSRNOG00000003743.7	Dars	13:45073985-45077906	971	9.97633e-05	3.4534	0.0060837
ENSRNOG00000018413.7	Per3	5:168085987-168106118	4518	0.000100347	-11.441	0.00611053
ENSRNOG00000058186.1	Errfi1	5:167951857-167967668	6422	0.000100641	4.86716	0.00612403
ENSRNOG00000003048.6	Tiprl	13:83478968-83504526	1775	0.000100953	-25.5322	0.00613866
ENSRNOG00000025430.4	Ddx18	13:37530381-37536103	732	0.000102502	-18.6467	0.00622269
ENSRNOG00000011778.6	Blvra	3:119552578-119566701	477	0.000102555	-27.7106	0.00622269
ENSRNOG00000015573.5	Ctbs	2:252305831-252320387	1658	0.000103053	-5.24398	0.00623958
ENSRNOG00000019189.7	Acat2	1:47972350-48016797	446	0.000103597	-9.036	0.0062636
ENSRNOG00000004621.8	Rtn4	14:114152197-114174459	1852	0.000103597	-4.69315	0.0062636
ENSRNOG00000033206.4	Entpd5	6:108087417-108099722	4283	0.000104024	-3.61284	0.00628498
ENSRNOG00000053583.1	Mapk3	1:198193795-198198981	1681	0.000105458	8.82767	0.00634992
ENSRNOG00000010807.5	Cox6c	7:74723176-74735693	493	0.000105472	53.3589	0.00634992
ENSRNOG00000019834.6	Hsp90ab1	9:17817720-17823291	2639	0.000106336	5.64614	0.00638835
ENSRNOG00000004517.8	Igf1	7:28477556-28492052	14496	0.000106958	6.89463	0.00641877
ENSRNOG00000042696.2	Micos10	5:157548095-157573233	327	0.000106993	-8.91253	0.00641877
ENSRNOG00000001823.8	St6gal1	11:80927450-80934563	3754	0.000107799	15.8212	0.00646254
ENSRNOG00000033508.5	Mink1	10:57233927-57238531	2468	0.000108245	-3.50138	0.00648016
ENSRNOG00000008427.5	Necap2	5:159589775-159602251	2002	0.000108434	-9.76291	0.00648688
ENSRNOG00000010239.6	Cnbp	4:119747363-119756782	2185	0.000108707	-2.33439	0.00649868
ENSRNOG00000028017.5	Tmem109	1:226925112-226935710	1915	0.000109438	-10.9413	0.00652862
ENSRNOG00000003975.6	Pfn1	10:57272992-57277091	2211	0.00011089	-6.7507	0.0065921
ENSRNOG00000003967.3	Vmp1	10:73902836-73905324	1455	0.000111214	3.13748	0.00660672
ENSRNOG00000005434.7	Sptbn1	14:114517831-114520246	1566	0.000111306	2.02932	0.0066076
ENSRNOG00000048268.1	AABR07015067.1	14:46593259-46594515	332	0.00011162	3.38709	0.00662164
ENSRNOG00000038370.4	AABR07034632.1	11:81714513-81717809	861	0.000111829	-3.95611	0.00662622
ENSRNOG00000002039.6	Evi5	14:2939897-3038242	6831	0.00011226	8.14691	0.00664107
ENSRNOG00000045785.2	LOC100359687	8:56499829-56502094	303	0.000112848	25.677	0.00666656
ENSRNOG00000010029.6	Ubald2	10:105392795-105397643	1548	0.000114197	-2.01484	0.00674159
ENSRNOG00000010478.7	LOC299282	6:128048096-128057834	4049	0.000115384	-3.28751	0.00680244
ENSRNOG00000027938.5	Jcad	17:55667751-55670564	2813	0.000115388	3.30312	0.00680244
ENSRNOG00000011474.5	Ppp1r3b	16:60414716-60427474	4845	0.000116815	-4.56272	0.00687578
ENSRNOG00000021637.6	Ddx46	17:9475273-9475908	635	0.000116955	-7.86254	0.00687578
ENSRNOG00000023383.6	Ddx3x	X:10400356-10413995	4719	0.000117923	8.4266	0.00691359
ENSRNOG00000001242.6	Gstt3	20:13817794-13824723	1984	0.000119109	-7.0602	0.00697349
ENSRNOG00000012247.6	Rab7a	4:119910457-119959199	2121	0.000119895	-2.77191	0.00701471
ENSRNOG00000043098.1	Mt2A	19:11307955-11308317	362	0.000120505	-29.3827	0.00704071
ENSRNOG00000012693.5	Pmpcb	4:9908552-9912619	1102	0.000121143	3.47871	0.00707308
ENSRNOG00000025625.5	Rnase4	15:28022946-28034590	610	0.000121397	-2.01144	0.00707335
ENSRNOG00000026040.5	Prss53	1:199331246-199333015	1169	0.000121662	-15.6565	0.00708285
ENSRNOG00000012999.7	Phb2	4:157234846-157235382	536	0.000121726	8.69083	0.00708285
ENSRNOG00000006499.6	Cops5	5:8880880-8894791	1105	0.000122269	2.95705	0.00709985
ENSRNOG00000024352.6	Tyw1	12:29824989-29826166	1177	0.000123866	5.70725	0.00718673
ENSRNOG00000006778.7	Mmp19	7:3216456-3224201	2045	0.0001251	-7.1516	0.00723953
ENSRNOG00000021824.5	Dnajb1	19:24749498-24750907	1409	0.000125221	3.98797	0.0072408
ENSRNOG00000003990.6	Grb2	10:104193954-104263337	2845	0.000125377	-3.40621	0.0072408
ENSRNOG00000015654.8	Ghr	2:53413369-53414030	661	0.000128247	-3.17215	0.00738728
ENSRNOG00000006067.6	Aifm1	X:135304064-135343159	2184	0.000128287	-23.8257	0.00738728
ENSRNOG00000003185.5	Acbd3	13:99023852-99035560	2754	0.000128348	22.5787	0.00738728
ENSRNOG00000017466.6	Kif5b	17:54216466-54219197	2731	0.000128597	4.55418	0.00739661
ENSRNOG00000021882.6	Tmed9	17:9559853-9565310	2361	0.00012925	-5.14204	0.00742416
ENSRNOG00000001064.7	Sbno1	12:37641653-37653772	6739	0.000129364	23.4556	0.00742568
ENSRNOG00000045738.2	Ak4	5:120250615-120309432	4560	0.000130239	-2.12071	0.00746584
ENSRNOG00000011945.7	Cyfip1	1:114297127-114344080	2666	0.000131347	-22.875	0.00750913
ENSRNOG00000032487.4	Sts	X:45423659-45428786	1741	0.000131554	-12.2774	0.00751588
ENSRNOG00000019630.7	Hacl1	16:7718782-7758568	3715	0.000132071	-2.60836	0.00753533
ENSRNOG00000020317.7	Rab5if	3:152933642-152943869	1239	0.000132468	-3.66181	0.00755273
ENSRNOG00000018998.6	Yipf3	9:17115306-17118010	1973	0.000132554	6.44153	0.00755273
ENSRNOG00000013381.6	Tsg101	1:102941037-102952285	1151	0.000133743	3.95705	0.00761031
ENSRNOG00000054962.1	Dao	12:48360762-48373710	608	0.000133876	-3.13439	0.00761278
ENSRNOG00000014907.5	Aldh8a1	1:16921476-16930510	2278	0.000134348	2.26381	0.00763451
ENSRNOG00000008218.6	Atp6v0e2	4:78168035-78172254	1932	0.000134458	-2.66193	0.00763565
ENSRNOG00000006197.7	Calu	4:56625560-56653118	3223	0.00013619	-11.2921	0.00771342
ENSRNOG00000013484.5	Gsta1	9:27435812-27438441	949	0.000136319	5.4302	0.00771561
ENSRNOG00000007901.6	Tmed10	6:109165760-109171443	5060	0.00013665	5.00883	0.00772402
ENSRNOG00000010960.5	Ankh	2:80205065-80259662	4857	0.000136916	-4.41133	0.00773394
ENSRNOG00000060262.1	Prps1	X:111798204-111820270	2013	0.00013749	-16.3144	0.00775604
ENSRNOG00000015857.6	Ctsa	3:161302940-161304880	1061	0.000137801	3.60784	0.00776843
ENSRNOG00000010603.3	Gzma	2:44968764-44981463	894	0.000138254	-22.0854	0.00778881
ENSRNOG00000043077.3	Zfpm1	19:55094258-55151167	3897	0.000138976	-22.9016	0.0078243
ENSRNOG00000011622.5	Echdc1	1:30874234-30918298	2028	0.000140269	-5.35597	0.00788146
ENSRNOG00000060597.1	Syf2	5:153269826-153277570	1255	0.000140383	3.34245	0.00788269
ENSRNOG00000047023.2	Aldh1l1	4:123542950-123557634	1484	0.000140514	-5.77047	0.0078848
ENSRNOG00000015519.6	Ces1d	19:15195384-15213493	973	0.000141686	-2.81683	0.00793446
ENSRNOG00000017780.6	Akr7a2	5:157759394-157764261	635	0.000141772	-3.79057	0.00793446
ENSRNOG00000000923.8	Cct6a	12:30491413-30495087	1225	0.000143092	5.29973	0.00800311
ENSRNOG00000047179.3	Aplp2	8:32298524-32328839	3458	0.000144878	-8.70914	0.00808172
ENSRNOG00000058412.1	Morf4l1	8:97490400-97495020	273	0.000145032	-9.92533	0.00808504
ENSRNOG00000016791.8	Chka	1:219102022-219104820	2798	0.000145264	11.1459	0.0080896
ENSRNOG00000030237.2	Cox7c	2:14699877-14701906	481	0.000145305	4.87697	0.0080896
ENSRNOG00000011519.6	Orc5	4:9160066-9223998	2125	0.00014745	-23.6627	0.0081983
ENSRNOG00000030712.6	RT1-A2	20:5375129-5377579	1374	0.000149319	-15.6773	0.00829682
ENSRNOG00000042825.2	Cd300le	10:103581122-103590688	1073	0.000149728	-3.9612	0.00831412
ENSRNOG00000050860.2	Abcb11	3:55475203-55544894	8705	0.000150187	2.0549	0.00833418
ENSRNOG00000005195.6	Cst3	3:143219662-143223751	944	0.000150657	3.33256	0.00835481
ENSRNOG00000003472.8	Atp11c	X:143340486-143343390	2904	0.000151609	4.66992	0.00839234
ENSRNOG00000004143.4	Adipor1	13:51258757-51260237	1225	0.00015163	5.31475	0.00839234
ENSRNOG00000045743.2	Etnppl	2:235738388-235761011	5666	0.000152639	9.50362	0.0084372
ENSRNOG00000042369.2	RGD1564614	13:56901796-56922445	1124	0.000152787	-31.9531	0.00843989
ENSRNOG00000003977.5	Dusp1	10:16970437-16973425	2728	0.000154462	7.23545	0.00852136
ENSRNOG00000028650.7	Inf2	6:137171625-137180626	2567	0.000156586	-3.81449	0.00863293
ENSRNOG00000004061.5	Pnn	6:80165531-80168368	2837	0.00015714	-7.18325	0.00864666
ENSRNOG00000012716.8	Chd2	1:134757888-134794403	4982	0.00015732	-8.80685	0.00865099
ENSRNOG00000016629.7	Tut7	9:16512940-16516502	1624	0.000158731	-2.09919	0.00872294
ENSRNOG00000020853.7	Scap	8:118623536-118628651	2582	0.00015929	-2.11198	0.00874801
ENSRNOG00000016379.7	Jtb	2:189591354-189596421	1851	0.000160216	-3.61605	0.00879315
ENSRNOG00000033164.5	Cyp2b3	1:83199979-83238694	13396	0.000160339	3.5635	0.00879424
ENSRNOG00000045743.2	Etnppl	2:235757261-235760622	3361	0.000161242	-7.11602	0.00883806
ENSRNOG00000006859.6	Insig1	4:342170-342706	536	0.000164107	-3.36034	0.00898932
ENSRNOG00000020049.5	Slc7a6os	19:38180854-38189530	1508	0.00016437	-9.73965	0.00899795
ENSRNOG00000032297.2	Msmo1	16:26873468-26875975	1382	0.000165455	7.37354	0.00904697
ENSRNOG00000007218.7	Leap2	10:38773991-38774517	362	0.000165884	-16.2943	0.00906331
ENSRNOG00000020696.5	Pmvk	2:188784160-188793895	1153	0.000166544	-3.68922	0.00908335
ENSRNOG00000013498.4	Pex14	5:165782892-165808499	1720	0.000166571	-3.01449	0.00908335
ENSRNOG00000010502.7	Fbxo8	16:37131259-37159755	1718	0.000167156	4.83518	0.00909695
ENSRNOG00000000438.5	Rnf5	20:4495415-4498295	802	0.00016718	-3.05579	0.00909695
ENSRNOG00000013009.2	Ldha	1:102908341-102909769	970	0.000167248	6.12006	0.00909695
ENSRNOG00000015519.6	Ces1d	19:15223785-15239821	810	0.000167495	5.07482	0.00910454
ENSRNOG00000019710.6	Tm9sf1	15:34314644-34320585	1897	0.000170382	-3.71317	0.00924968
ENSRNOG00000003177.7	Mat2b	10:25831982-25833186	1204	0.000174516	10.2819	0.00944396
ENSRNOG00000015654.8	Ghr	2:53175433-53233404	10561	0.000176398	7.65115	0.00952762
ENSRNOG00000018788.6	Btbd2	7:11940705-11943558	1779	0.000176674	-12.8412	0.00953646
ENSRNOG00000016511.6	Pitrm1	17:68499420-68504334	416	0.000178327	-13.4124	0.00961806
ENSRNOG00000024128.6	Aco2	7:123141979-123145635	1995	0.000178638	5.25741	0.00961806
ENSRNOG00000018939.7	Rexo2	8:52802603-52814321	1185	0.000179621	-2.54971	0.00965877
ENSRNOG00000004009.6	Xpnpep2	X:134960301-134970321	1957	0.000180001	-2.74575	0.00967308
ENSRNOG00000053196.1	Slc48a1	7:139271624-139281429	3553	0.00018529	-6.66778	0.0099322
ENSRNOG00000014350.4	Ccn1	2:251529349-251532312	1988	0.000185651	14.3416	0.00994532
ENSRNOG00000003144.6	Gprc5c	10:103396141-103417366	3493	0.000186415	-2.19255	0.00997368
ENSRNOG00000001139.8	Suds3	12:45199339-45221515	2498	0.000187005	-3.67375	0.00999897
ENSRNOG00000001928.8	Il1rap	11:77483056-77593207	2469	0.0001873	-2.99855	0.0100022
ENSRNOG00000028557.6	Hibch	9:53446131-53450350	846	0.000188835	2.69917	0.0100778
ENSRNOG00000029549.4	Eci3	17:30617167-30639941	2272	0.000189566	-2.52296	0.0101105
ENSRNOG00000014051.4	Pgrmc2	2:127984988-128002050	2992	0.000190104	2.08898	0.0101328
ENSRNOG00000014915.6	Gsr	16:62196145-62215559	3024	0.000190629	2.08293	0.0101544
ENSRNOG00000024501.6	Rgs3	5:78563802-78567288	1557	0.000191053	-3.34053	0.0101707
ENSRNOG00000014256.3	Foxa3	1:79920751-79930271	2088	0.000191328	-5.06935	0.0101789
ENSRNOG00000053468.1	Tuba1b	7:140614740-140616199	1294	0.00019163	-10.1813	0.0101886
ENSRNOG00000018708.6	Ppp1ca	1:219439911-219444187	2050	0.000192977	-10.0442	0.0102474
ENSRNOG00000058694.1	Alg5	2:143932699-143946474	1471	0.000193941	-4.14024	0.0102922
ENSRNOG00000000847.8	Csnk2b	20:5108691-5113040	987	0.000194296	-64.6075	0.0103043
ENSRNOG00000017808.6	Klf15	4:122365003-122377691	2348	0.000194532	-6.31389	0.0103043
ENSRNOG00000012832.5	Mfsd5	7:143881999-143884281	1735	0.00019689	-6.75838	0.0104097
ENSRNOG00000059015.1	Triobp	7:120262915-120265504	471	0.000199773	-7.14395	0.0105556
ENSRNOG00000002783.8	Serpinc1	13:78818001-78820369	321	0.000200475	-13.6512	0.0105795
ENSRNOG00000014621.7	Rab8a	16:19355038-19376906	1882	0.000202455	-8.75135	0.0106642
ENSRNOG00000016751.5	Slc25a28	1:263419981-263431380	1678	0.000204461	-25.6218	0.0107565
ENSRNOG00000025418.6	Armc9	9:93227449-93273688	773	0.000206731	-2.72989	0.0108558
ENSRNOG00000019974.6	Uba52	16:20668957-20671127	737	0.000209825	-2.67376	0.0109979
ENSRNOG00000007407.6	Ndufa12	7:35125423-35163191	651	0.000210173	3.81239	0.0110026
ENSRNOG00000003232.4	Slc9a3r1	10:103724998-103730463	1822	0.000212226	8.92824	0.0111032
ENSRNOG00000055721.1	Rnf128	X:110876421-110878280	1859	0.000212448	9.52925	0.011108
ENSRNOG00000017571.5	Ndufa2	18:29585402-29587784	852	0.000213184	-25.3979	0.0111343
ENSRNOG00000015911.7	Lrp5	1:218816831-218839721	2152	0.000214529	-2.4952	0.0111893
ENSRNOG00000010330.8	Mark3	6:136119372-136129775	1474	0.000215826	17.5302	0.0112432
ENSRNOG00000021405.6	Cyp2c7	1:148067560-148097944	1918	0.000217095	2.46203	0.0113023
ENSRNOG00000005551.6	Derl1	7:97759514-97759955	441	0.000217284	-16.9044	0.0113053
ENSRNOG00000047781.2	Slc25a23	9:9988005-9994722	991	0.000218324	-14.4046	0.0113455
ENSRNOG00000019383.7	Tef	7:123043460-123048703	1594	0.000219278	-6.08973	0.0113812
ENSRNOG00000001053.5	Tmed2	12:37471255-37480354	2019	0.000220338	-2.25434	0.0114292
ENSRNOG00000016552.6	Hmgcs1	2:52427507-52445268	3468	0.000225792	-3.98112	0.0116863
ENSRNOG00000019458.7	Shpk	10:59765257-59789679	2853	0.000227077	-12.7575	0.0117359
ENSRNOG00000047393.2	Krt18	7:143627700-143633628	3620	0.00022728	-23.4339	0.0117392
ENSRNOG00000050183.4	RT1-CE1	20:4939614-4940246	292	0.000227744	-2.33648	0.011756
ENSRNOG00000017577.6	Bphl	17:31498727-31499450	723	0.00022791	7.32327	0.0117575
ENSRNOG00000051171.2	G6pc	10:89294134-89294736	530	0.000233314	5.56664	0.0119842
ENSRNOG00000016097.7	Kyat1	3:8752455-8766980	2133	0.000233432	-4.5118	0.0119842
ENSRNOG00000006652.6	Ddx1	6:38422887-38425636	855	0.000235921	-2.30597	0.0120828
ENSRNOG00000008243.7	Slc43a1	3:72255374-72265229	1900	0.000237435	-3.86699	0.0121531
ENSRNOG00000004515.4	Pes1	14:84211557-84227979	2124	0.000238699	-4.78927	0.0122086
ENSRNOG00000013381.6	Tsg101	1:102941037-102971004	1710	0.000240339	-4.21962	0.0122795
ENSRNOG00000011612.3	Tdo2	2:180896194-180915015	10843	0.000243117	4.45575	0.0124065
ENSRNOG00000017418.5	Rps3	1:164435868-164436978	348	0.000244627	-3.29319	0.0124612
ENSRNOG00000006305.5	Slc38a2	7:138088640-138099000	7673	0.000246841	12.7328	0.0125514
ENSRNOG00000017876.6	Dnajc21	2:60419301-60428875	920	0.000248183	12.7603	0.0126121
ENSRNOG00000018176.7	Rab6a	1:165659726-165664198	2485	0.000249175	2.95514	0.0126474
ENSRNOG00000021085.8	Sf1	1:221746261-221750116	2720	0.000250106	5.40702	0.0126781
ENSRNOG00000009715.6	Me1	8:94256014-94368944	4009	0.000250265	-6.99515	0.0126781
ENSRNOG00000004425.6	Klhdc1	6:91532437-91533208	273	0.000250375	-21.4124	0.0126781
ENSRNOG00000007775.7	Cmpk1	5:133758674-133761980	2342	0.000251414	14.0136	0.0127155
ENSRNOG00000019630.7	Hacl1	16:7718782-7758568	5494	0.000252105	-4.93383	0.0127429
ENSRNOG00000002807.8	Septin9	10:106344115-106349018	906	0.000252943	-2.95191	0.012773
ENSRNOG00000000172.7	Sqor	3:114894922-114939509	1836	0.000257326	-3.69256	0.0129606
ENSRNOG00000006380.6	Srsf6	3:159305309-159310739	4880	0.00025911	2.63228	0.013035
ENSRNOG00000021005.7	Mrpl16	1:228142753-228149754	3348	0.000260681	-22.5081	0.0131042
ENSRNOG00000002378.7	Bpnt1	13:103284052-103293051	1760	0.000260793	5.5863	0.0131042
ENSRNOG00000012247.6	Rab7a	4:119910457-119916825	1800	0.000261113	2.75444	0.0131125
ENSRNOG00000004206.5	Glrx5	6:128750486-128751108	622	0.000261405	-15.1858	0.0131165
ENSRNOG00000018708.6	Ppp1ca	1:219442333-219444187	1673	0.000263774	4.26564	0.0132017
ENSRNOG00000003649.9	Qsox1	13:73423390-73426567	1188	0.000263974	-2.75638	0.0132017
ENSRNOG00000016585.7	Bmi1	17:85367674-85370283	2609	0.000266066	6.90793	0.0132593
ENSRNOG00000002721.7	Ndufb4	11:65959878-65965306	736	0.000266163	-2.70166	0.0132593
ENSRNOG00000002176.6	Nectin3	11:57946837-57950289	3452	0.000266373	6.90691	0.0132593
ENSRNOG00000012878.7	Atp7b	16:74945420-74947370	1950	0.000267689	21.7835	0.0133092
ENSRNOG00000002839.6	Slc19a2	13:82552585-82566821	5992	0.000268936	7.78867	0.0133634
ENSRNOG00000011294.7	Usp33	2:257595203-257602817	5435	0.000269158	10.4866	0.0133666
ENSRNOG00000003430.7	F9	X:143139435-143142033	2262	0.000270999	2.11221	0.0134345
ENSRNOG00000016033.6	Endog	3:8743660-8752730	3608	0.000271639	-2.78372	0.0134584
ENSRNOG00000012650.5	Mrpl3	8:113622714-113626893	754	0.000272075	-3.99478	0.0134722
ENSRNOG00000018279.7	Sfxn1	17:11045760-11082059	3014	0.000272823	-20.8738	0.0135013
ENSRNOG00000018529.7	Csnk1g2	7:11944944-11963291	2412	0.000273295	-8.93355	0.0135168
ENSRNOG00000013229.6	Mthfs	8:96611970-96615593	3623	0.000279437	13.3435	0.013757
ENSRNOG00000007315.7	Thoc2	X:128171372-128191097	1858	0.000279445	-25.7731	0.013757
ENSRNOG00000025074.6	Fgg	2:181987092-181988050	568	0.000282859	-5.59517	0.0138929
ENSRNOG00000042499.1	LOC100364435	4:100882214-100883313	543	0.000284236	-22.145	0.0139521
ENSRNOG00000021960.2	AC109958.1	13:93560363-93561301	938	0.000284391	-2.70536	0.0139521
ENSRNOG00000028426.7	Mcf2l	16:81869239-81874752	1765	0.000284954	-6.4384	0.013965
ENSRNOG00000018159.7	Anxa4	4:118538769-118539833	1064	0.000284983	5.89349	0.013965
ENSRNOG00000048848.2	Ccdc9	1:78214145-78226362	3369	0.000286602	-22.2154	0.0140281
ENSRNOG00000000411.6	Nus1	20:33556952-33584012	3745	0.000287682	-7.14648	0.0140527
ENSRNOG00000059015.1	Triobp	7:120260651-120262641	1990	0.000287764	-3.22264	0.0140527
ENSRNOG00000009488.4	Cyp7a1	5:19358243-19368451	6058	0.000288763	-3.1557	0.0140934
ENSRNOG00000007139.2	Ttpa	5:34007170-34023613	16443	0.000289204	11.0902	0.0141068
ENSRNOG00000049484.3	Atp9a	3:165412796-165477779	2438	0.000290279	-8.08551	0.0141511
ENSRNOG00000007395.6	Baat	5:64762249-64774904	12655	0.000297969	2.80566	0.0144268
ENSRNOG00000024470.5	Lman1	18:61683371-61700450	2902	0.000303563	-3.19427	0.014656
ENSRNOG00000018153.6	Rbm5	8:116502936-116506584	954	0.00030376	-3.37811	0.0146571
ENSRNOG00000020602.7	Ndufa13	16:21275191-21281201	292	0.000304499	-2.28271	0.0146718
ENSRNOG00000005482.5	Sap30bp	10:104482973-104515685	3235	0.000304581	-9.18866	0.0146718
ENSRNOG00000016892.4	Nr2f6	16:19769959-19772387	1341	0.00030611	4.79388	0.0147371
ENSRNOG00000055446.1	Amfr	19:11506796-11509900	2380	0.00030773	2.63289	0.0147984
ENSRNOG00000060568.1	Ptpn21	6:122656368-122660039	2466	0.000308308	-4.13352	0.0148177
ENSRNOG00000018483.7	Smad1	19:32188258-32248722	3027	0.000312591	21.7451	0.0149715
ENSRNOG00000015583.7	Dnal4	7:120987445-121000286	1501	0.000312629	-19.3813	0.0149715
ENSRNOG00000004377.6	Lpin1	6:41796205-41809160	6000	0.000312738	5.07926	0.0149715
ENSRNOG00000014160.4	Tcp1	1:48030664-48033447	566	0.000318142	-14.6005	0.0152045
ENSRNOG00000020878.4	Keap1	8:22250458-22259779	3233	0.000318934	-4.15874	0.0152309
ENSRNOG00000003147.8	Sqstm1	10:35704085-35709336	5049	0.000319053	25.0951	0.0152309
ENSRNOG00000023778.6	Gcnt2	17:21634454-21639935	2785	0.000321125	-8.12347	0.0152955
ENSRNOG00000020075.7	Eef1g	1:225163206-225173518	1342	0.000323362	-7.97913	0.0153677
ENSRNOG00000008981.7	Pdcd6ip	8:121916184-121973155	8068	0.000326928	4.36507	0.0155025
ENSRNOG00000013994.6	Enpp1	1:21805631-21814096	2696	0.000328223	3.78368	0.0155472
ENSRNOG00000004302.7	Pah	7:28066494-28077335	585	0.000328238	-6.13092	0.0155472
ENSRNOG00000004925.8	Ppp1r12a	7:51415389-51425460	950	0.000331222	-17.9927	0.0156799
ENSRNOG00000006828.7	Baz1a	6:75827403-75832143	567	0.000331872	-12.2302	0.0157019
ENSRNOG00000059653.1	Rpp25l	5:58096212-58097597	780	0.000333596	-29.9821	0.0157618
ENSRNOG00000013133.3	Foxa2	3:142382963-142387531	2588	0.000333908	-11.0105	0.0157618
ENSRNOG00000012929.6	Wsb1	10:66586906-66603151	3556	0.000338949	3.76282	0.0159727
ENSRNOG00000025100.3	Ikbke	13:48031317-48049177	2328	0.000339099	-16.257	0.0159727
ENSRNOG00000047503.2	Apoc3	8:50527961-50531603	1997	0.000340284	-2.66393	0.016002
ENSRNOG00000002818.7	Eftud2	10:90932067-90983942	3288	0.000348283	-12.4042	0.016315
ENSRNOG00000020204.7	Srp19	18:27114630-27121106	995	0.000349521	-2.48726	0.016364
ENSRNOG00000026646.5	Ndufs5	5:141390577-141390789	212	0.000349987	-3.85547	0.0163768
ENSRNOG00000005358.5	Pmm1	7:123183489-123193825	1276	0.000354527	-5.70209	0.0165437
ENSRNOG00000040120.4	Bhmt2	2:23269117-23289319	9328	0.000356305	5.50779	0.0165994
ENSRNOG00000006681.4	Rdh10	5:2603504-2630356	2706	0.000361807	4.14489	0.0168281
ENSRNOG00000018159.7	Anxa4	4:118538769-118595601	1984	0.000365403	-2.99794	0.016986
ENSRNOG00000005437.6	Rida	7:73256019-73270391	1460	0.000367861	23.3003	0.0170723
ENSRNOG00000010154.7	Zc3hc1	4:57684671-57688063	668	0.000368571	4.00784	0.0170851
ENSRNOG00000012183.5	Glrx	2:2615013-2615980	967	0.000374423	7.96603	0.0172732
ENSRNOG00000030790.5	Ctnnd1	3:72001894-72006489	3016	0.000375144	4.28105	0.0172877
ENSRNOG00000007048.5	Rap1b	7:60850332-60852558	2226	0.000375934	15.283	0.0173054
ENSRNOG00000033529.5	Amy1a	2:216433056-216443904	1564	0.000383486	-4.0767	0.0175959
ENSRNOG00000013343.6	Myg1	7:143929633-143936904	1230	0.000386349	15.0302	0.0177081
ENSRNOG00000019383.7	Tef	7:123052744-123058607	3816	0.00038946	-5.73469	0.0178219
ENSRNOG00000057855.1	F5	13:82530979-82536385	1390	0.000390017	2.36683	0.0178378
ENSRNOG00000051170.2	Ddx17	7:120762586-120763918	1332	0.00039287	21.9854	0.0179394
ENSRNOG00000034116.6	Gk	X:54227021-54238430	3294	0.00039353	22.4421	0.0179599
ENSRNOG00000001795.8	Itgb5	11:70057362-70172364	3018	0.000394477	-5.07737	0.0179907
ENSRNOG00000016273.5	Fam136a	4:118160114-118166065	1642	0.000401364	-3.75585	0.0182586
ENSRNOG00000009421.5	Ivd	3:110686395-110691953	3049	0.000403813	21.1539	0.0183504
ENSRNOG00000015437.7	Tmem14c	17:21571306-21577604	1806	0.000406065	-10.159	0.0184362
ENSRNOG00000001436.5	Ywhag	12:23789559-23817890	3550	0.000406183	-3.16391	0.0184362
ENSRNOG00000000610.6	Cisd1	20:18493062-18507681	1971	0.000409234	-3.39106	0.0185467
ENSRNOG00000014604.6	Sigmar1	5:58121785-58123976	1236	0.000409441	3.33833	0.0185467
ENSRNOG00000015869.5	Pccb	8:109367603-109419140	3362	0.000410535	-10.9492	0.0185765
ENSRNOG00000013461.7	Ralbp1	9:113594486-113599736	970	0.000412505	-28.6725	0.0186458
ENSRNOG00000021871.6	Gcn1	12:46728561-46731316	1171	0.000417056	-3.18049	0.0188338
ENSRNOG00000010558.7	Ppif	16:1978768-1985916	1911	0.000417107	-4.8831	0.0188338
ENSRNOG00000001171.6	Coq5	12:47078521-47095452	1804	0.000418141	-9.10374	0.0188705
ENSRNOG00000052968.1	Hnrnpa3	3:62483769-62484203	434	0.000420784	7.79568	0.0189721
ENSRNOG00000024964.7	Nufip2	10:65168097-65200308	10825	0.000422035	6.81653	0.0190159
ENSRNOG00000002050.4	Igfbp7	14:33063467-33070193	614	0.000423026	2.32308	0.0190404
ENSRNOG00000019598.8	Vegfa	9:17340325-17355685	4272	0.000423587	4.48786	0.0190556
ENSRNOG00000000867.6	Vars1	20:5007039-5008262	585	0.000424621	8.5629	0.019092
ENSRNOG00000059330.1	AABR07004549.1	1:147420485-147424872	4387	0.000425012	5.83494	0.0190995
ENSRNOG00000001820.7	Med21	4:180961141-180968155	826	0.000428297	-3.23037	0.0192083
ENSRNOG00000007426.3	Tmem64	5:28850731-28867227	1358	0.000428838	-5.57503	0.0192207
ENSRNOG00000010079.6	Ca3	2:88126203-88129815	1528	0.000431733	3.71748	0.01933
ENSRNOG00000047185.2	Eif3i	5:147796478-147796948	358	0.000435495	-6.10929	0.0194882
ENSRNOG00000009020.7	Tsta3	7:116958391-116962711	1396	0.000439418	-2.299	0.0196122
ENSRNOG00000019047.6	Ola1	3:59802005-59921017	1768	0.000441777	-23.6684	0.0196968
ENSRNOG00000003399.8	Hnrnph1	10:35871098-35879914	2689	0.000442253	3.37827	0.0197066
ENSRNOG00000014872.7	Sec24d	2:227561830-227563093	1263	0.000442459	5.98571	0.0197066
ENSRNOG00000006653.5	Slc38a4	7:138476552-138495083	704	0.000447049	-3.26698	0.0198902
ENSRNOG00000012385.6	Naa15	2:140514200-140534324	4766	0.000448938	-8.35079	0.0199638
ENSRNOG00000000164.4	Lamp2	X:124730297-124766084	3547	0.000451231	2.23832	0.020048
ENSRNOG00000018445.4	Agt	19:57318767-57323154	3763	0.000451302	6.33255	0.020048
ENSRNOG00000020775.8	Cyp2b2	1:83111845-83119578	1408	0.000451903	-4.01007	0.0200642
ENSRNOG00000005177.8	Tp53i3	13:75111760-75145968	4103	0.000452593	-7.00717	0.0200738
ENSRNOG00000009832.6	Slc39a14	15:51979642-51995542	12572	0.000454643	12.5517	0.0201333
ENSRNOG00000000529.5	Pim1	20:8165013-8170023	2060	0.000461095	-6.98417	0.0203871
ENSRNOG00000021513.1	Rtn4rl2	3:72272724-72289331	2024	0.0004624	-2.80006	0.0204236
ENSRNOG00000006608.5	Tmem70	5:2019893-2021405	1512	0.000462863	7.14302	0.0204335
ENSRNOG00000011586.7	LOC100909712	2:157747236-157760071	4431	0.000464543	10.1928	0.0204864
ENSRNOG00000017466.6	Kif5b	17:54194409-54219197	5136	0.000465775	-6.08333	0.0205301
ENSRNOG00000019007.7	Rpl14	8:129242820-129243736	730	0.000466815	70.5391	0.0205652
ENSRNOG00000004342.7	Ahr	6:54963986-55001919	7326	0.000468634	9.19919	0.0206023
ENSRNOG00000015866.5	Hint2	5:59150311-59152749	874	0.00047263	-2.59986	0.0207569
ENSRNOG00000018691.7	Aurkaip1	5:173274435-173276169	1105	0.000475134	-44.763	0.0208346
ENSRNOG00000011294.7	Usp33	2:257557373-257580924	1616	0.00047557	-9.34286	0.020843
ENSRNOG00000005447.5	Ypel2	10:74240729-74249447	4741	0.000476575	3.05106	0.0208656
ENSRNOG00000003049.7	Hsd17b10	X:21696958-21699247	1107	0.000480144	-3.26683	0.0210002
ENSRNOG00000003500.4	Apoa2	13:89596872-89599908	1658	0.000480402	3.25572	0.0210007
ENSRNOG00000019655.7	Atp6v0b	5:136718350-136721396	1023	0.000481924	-21.9615	0.0210564
ENSRNOG00000012081.6	Txn1	5:75049593-75062032	536	0.000482461	4.92783	0.0210691
ENSRNOG00000019618.7	Hdac3	18:31094071-31094369	204	0.000485727	-5.6614	0.0212008
ENSRNOG00000015239.7	Ginm1	1:1870048-1885981	1587	0.000486871	-2.93326	0.0212398
ENSRNOG00000007139.2	Ttpa	5:34007854-34008134	280	0.000489255	-21.4374	0.021322
ENSRNOG00000007884.4	Bcap29	6:50883750-50884970	1220	0.000489592	8.77728	0.0213248
ENSRNOG00000030126.5	Clk3	8:62527925-62529378	811	0.000489822	-7.50024	0.0213248
ENSRNOG00000013376.6	Mvd	19:55258904-55269023	1769	0.000492848	-20.3174	0.0214127
ENSRNOG00000020673.4	Pbxip1	2:188763931-188777604	4203	0.000492848	-14.6446	0.0214127
ENSRNOG00000028956.5	Mbd3	7:12178926-12186255	1696	0.000495672	-2.25861	0.0215134
ENSRNOG00000002394.6	Tpr	13:67653019-67672175	2559	0.000498814	-13.0359	0.0216057
ENSRNOG00000024455.6	Gnptg	10:14590409-14594334	3519	0.000498814	19.36	0.0216057
ENSRNOG00000010540.6	Mrpl45	10:85257847-85269806	2233	0.000498814	-20.0804	0.0216057
ENSRNOG00000010635.7	Igfbp4	10:86949258-86963210	4106	0.000499672	-7.36423	0.0216318
ENSRNOG00000045743.2	Etnppl	2:235752782-235760622	3843	0.000500071	-6.22295	0.0216381
ENSRNOG00000056860.1	AABR07062823.1	15:28032607-28035502	1652	0.000501293	-2.45334	0.0216689
ENSRNOG00000004726.7	Mapkapk2	13:47785148-47789709	2161	0.000501869	-6.96266	0.0216828
ENSRNOG00000056596.1	Alas1	8:114927618-114941070	2248	0.000504034	-20.4836	0.0217543
ENSRNOG00000021637.6	Ddx46	17:9475273-9479515	1893	0.000504529	4.49016	0.0217575
ENSRNOG00000018977.5	Ap3d1	7:11868693-11873994	1894	0.000504876	-2.48338	0.0217575
ENSRNOG00000002911.5	Alb	14:19176294-19177533	176	0.000505236	-10.6059	0.021762
ENSRNOG00000018403.7	Atg4b	9:100888500-100920234	3054	0.000514149	-3.92667	0.0221074
ENSRNOG00000004009.6	Xpnpep2	X:134968110-134970321	1661	0.000514391	5.27526	0.0221074
ENSRNOG00000010298.6	Xbp1	14:85753021-85760404	4885	0.000515777	3.15777	0.0221376
ENSRNOG00000021157.7	Ctss	2:197653025-197663110	378	0.000516285	-3.24109	0.0221482
ENSRNOG00000008256.5	Mrpl38	10:104682371-104683324	583	0.000517156	3.32957	0.0221744
ENSRNOG00000001795.8	Itgb5	11:70057362-70130807	2457	0.000518207	-3.13742	0.0222082
ENSRNOG00000003399.8	Hnrnph1	10:35870231-35880000	5141	0.000523669	4.20214	0.0223972
ENSRNOG00000014254.3	Cpt1a	1:218626295-218629682	2221	0.000527291	-2.95129	0.0225408
ENSRNOG00000016271.5	Itm2b	15:55254663-55259117	1535	0.000528642	20.2775	0.0225835
ENSRNOG00000027332.2	Gemin6	6:2907060-2911582	1195	0.000528822	-3.1181	0.0225835
ENSRNOG00000036693.2	Slc25a10	10:109665622-109675055	4115	0.000530692	-2.88686	0.0226406
ENSRNOG00000017751.8	Arl6ip1	1:187770157-187779706	2149	0.000534256	-24.8484	0.0227357
ENSRNOG00000046585.2	AABR07054370.1	3:150188211-150188634	423	0.000535177	-2.50984	0.0227635
ENSRNOG00000011168.5	Micu2	15:38191498-38194385	1475	0.000536524	4.3055	0.022798
ENSRNOG00000010497.7	RGD1305807	5:61425745-61467649	3816	0.000538387	-3.50892	0.022847
ENSRNOG00000004448.7	Acss3	7:49046247-49049953	3706	0.000538483	2.97678	0.022847
ENSRNOG00000009243.4	Oaf	8:47511246-47515190	1936	0.000538938	4.92428	0.0228549
ENSRNOG00000048114.3	Echdc3	17:76002274-76002523	249	0.00053956	-3.60125	0.0228699
ENSRNOG00000006967.7	Xiap	X:128409372-128440169	1096	0.000545727	-14.1849	0.0230853
ENSRNOG00000061928.1	Myo1e	8:76799616-76840561	2388	0.000548792	-10.2467	0.023174
ENSRNOG00000018403.7	Atg4b	9:100915056-100920234	2255	0.000548915	20.5366	0.023174
ENSRNOG00000008672.7	Chmp5	5:57267292-57284459	1350	0.00055234	-10.6425	0.0233035
ENSRNOG00000017758.7	LOC361985	2:189400635-189413608	1666	0.000555079	-4.14271	0.0233986
ENSRNOG00000011994.6	Perp	1:14235400-14237091	1691	0.000555335	6.36407	0.0233986
ENSRNOG00000055721.1	Rnf128	X:110869250-110878280	2019	0.00056018	12.413	0.0235561
ENSRNOG00000010558.7	Ppif	16:1980509-1985916	1277	0.000560458	-2.2517	0.0235561
ENSRNOG00000015438.5	LOC501233	19:15294247-15302457	739	0.00056388	-3.02648	0.0236716
ENSRNOG00000011861.6	Aadat	16:32831334-32868757	2610	0.000564197	-6.81055	0.0236716
ENSRNOG00000014532.2	Lbp	3:154802757-154813551	1644	0.000564318	6.61623	0.0236716
ENSRNOG00000008652.6	Phip	8:90417762-90422583	728	0.000566541	-13.8051	0.0237395
ENSRNOG00000030763.4	Dpp4	3:48290095-48295722	3865	0.000566547	6.72044	0.0237395
ENSRNOG00000018426.6	NEWGENE_2134	1:80606078-80609405	908	0.000566775	-2.3959	0.0237395
ENSRNOG00000000787.7	AABR07044364.1	20:3248133-3249189	750	0.000568029	-5.35722	0.0237803
ENSRNOG00000002569.7	Mrps14	13:77940419-77946201	1292	0.000570501	-3.37825	0.0238455
ENSRNOG00000003147.8	Sqstm1	10:35704085-35709313	5026	0.000577635	2.70337	0.0241232
ENSRNOG00000006756.8	Maged1	X:63803188-63804072	675	0.000585284	-2.01359	0.0244186
ENSRNOG00000007801.7	R3hdm2	7:70801126-70805753	1911	0.00058787	3.02856	0.0245067
ENSRNOG00000012123.3	Fdx1	8:56386750-56393281	607	0.000588365	-8.11391	0.0245111
ENSRNOG00000011184.6	Slc13a4	4:62796571-62826209	2940	0.000589922	-2.81758	0.0245639
ENSRNOG00000016207.4	Galnt1	18:16146446-16187295	3778	0.000598976	-4.94508	0.0249165
ENSRNOG00000037402.2	Cops9	9:99813321-99818283	517	0.000607153	-3.66215	0.0252068
ENSRNOG00000001926.6	Cldn1	11:77827782-77830372	2590	0.000607436	3.29397	0.0252068
ENSRNOG00000002839.6	Slc19a2	13:82552585-82566821	9889	0.00060807	14.6558	0.0252166
ENSRNOG00000017420.7	Nudt6	2:124134301-124141544	670	0.000608265	10.9584	0.0252166
ENSRNOG00000051232.2	Gbe1	11:7422271-7485967	1530	0.000610039	2.57326	0.0252532
ENSRNOG00000012247.6	Rab7a	4:119910459-119963080	2059	0.000622215	-4.08226	0.0257322
ENSRNOG00000014173.7	Smc3	1:274328312-274352876	3614	0.000625768	-6.16192	0.0258403
ENSRNOG00000011027.5	Uba5	8:112578425-112588506	2304	0.000626347	5.54781	0.0258403
ENSRNOG00000010964.6	Akap13	1:137249370-137280380	595	0.000627174	-10.2214	0.0258596
ENSRNOG00000010725.3	Cpa1	4:57957054-57959116	595	0.000630586	4.67001	0.0259523
ENSRNOG00000000532.7	Cmtr1	20:8324980-8368778	3792	0.000631009	-10.6911	0.0259571
ENSRNOG00000001657.5	Cldnd1	11:43986347-43991207	2010	0.000632569	6.76428	0.0260065
ENSRNOG00000001847.6	Ccdc91	4:182042416-182043650	1234	0.00063282	4.57755	0.0260065
ENSRNOG00000007395.6	Baat	5:64762249-64774904	10665	0.000633512	4.65437	0.0260223
ENSRNOG00000017752.6	Mccc2	2:30174976-30246031	2205	0.000640468	-24.4574	0.0262827
ENSRNOG00000050183.4	RT1-CE1	20:4939614-4940259	257	0.000646372	-2.30545	0.0265122
ENSRNOG00000018838.7	Paox	1:212594835-212604134	2178	0.000652131	-2.77322	0.0266969
ENSRNOG00000016265.7	Acsl5	1:276278942-276290015	1395	0.000653273	-2.1533	0.0267298
ENSRNOG00000005686.6	Suclg2	4:127552091-127553401	1310	0.000653563	5.75836	0.0267298
ENSRNOG00000004554.6	Dcn	7:38745094-38782323	1746	0.000654316	5.51055	0.0267477
ENSRNOG00000021125.8	Prdx5	1:222164441-222167600	989	0.000656181	5.37853	0.0268111
ENSRNOG00000018319.7	Pisd	14:83298648-83347855	2369	0.000660108	-4.18536	0.0269304
ENSRNOG00000033065.5	Rad50	10:39001433-39037340	3350	0.000660472	-6.23762	0.0269304
ENSRNOG00000021027.6	Dbp	1:101687900-101692846	3741	0.000660683	-6.843	0.0269304
ENSRNOG00000001336.7	Orai1	12:38981493-38982727	1234	0.000661851	5.91436	0.026965
ENSRNOG00000014779.5	Pdcd4	1:274625223-274648309	2504	0.000665	-21.6408	0.0270804
ENSRNOG00000009350.7	Sez6	10:64865801-64870266	2303	0.000670825	6.24881	0.0272784
ENSRNOG00000002385.7	Prg4	13:67672425-67674520	1067	0.000681366	2.37225	0.0276673
ENSRNOG00000017874.4	Cd53	2:209489275-209506219	1503	0.000683991	4.31544	0.0277607
ENSRNOG00000019924.6	Thop1	7:11501112-11501509	397	0.000688416	-7.76288	0.027927
ENSRNOG00000008895.5	Hnf4a	3:159956903-159965793	4997	0.000693325	5.73988	0.0280859
ENSRNOG00000013251.7	Trim24	4:65635041-65643163	3806	0.000694262	3.54904	0.0281105
ENSRNOG00000016776.5	Extl1	5:152573756-152589719	4125	0.000696925	-5.45082	0.0282049
ENSRNOG00000001068.7	Rac1	12:13090023-13111873	2421	0.00070443	-2.50211	0.0284816
ENSRNOG00000017420.7	Nudt6	2:124134303-124141544	668	0.000705579	-22.0638	0.0284923
ENSRNOG00000001336.7	Orai1	12:38981493-38995755	1755	0.000709354	-2.30708	0.0286262
ENSRNOG00000009333.7	Osgep	15:27842421-27843647	584	0.000710114	-24.7333	0.0286355
ENSRNOG00000020144.5	RGD1310127	1:199687725-199716223	2623	0.000710258	-21.8056	0.0286355
ENSRNOG00000012087.6	Ufsp2	16:49465946-49481821	1493	0.000714333	5.7534	0.0287652
ENSRNOG00000009103.7	Chrac1	7:114323525-114326945	866	0.000715024	-6.14383	0.0287731
ENSRNOG00000046560.1	AC109096.1	1:220836091-220836504	413	0.000720728	-3.09906	0.0289342
ENSRNOG00000020086.6	Aar2	3:152626798-152649609	3605	0.0007214	-4.99273	0.0289476
ENSRNOG00000010959.4	Klhl25	1:137333862-137348511	3274	0.000721944	-5.38222	0.0289557
ENSRNOG00000004740.7	Mmadhc	3:35783298-35801341	1765	0.000723732	2.9341	0.0290001
ENSRNOG00000016152.4	Dek	17:17986386-17989665	3279	0.000725972	3.89819	0.0290351
ENSRNOG00000020304.5	Pdcd11	1:266904011-266908042	2182	0.000728493	-8.99738	0.0291223
ENSRNOG00000020543.7	Nosip	1:101055575-101072150	1107	0.000729769	-2.92102	0.0291596
ENSRNOG00000060449.1	Rps21	3:175629170-175629588	317	0.000732514	-2.10141	0.0292418
ENSRNOG00000024016.7	Cyp2c6v1	1:147883943-147886012	458	0.0007369	33.1792	0.0294031
ENSRNOG00000018076.5	Fmo5	2:199797147-199823927	1973	0.000738722	-2.53029	0.029462
ENSRNOG00000017194.5	Prdx1	5:135545318-135552026	489	0.000739733	5.03675	0.0294884
ENSRNOG00000009381.6	Mapk6	8:82327895-82351108	4297	0.000740741	-7.39222	0.029501
ENSRNOG00000033206.4	Entpd5	6:108087417-108112718	5499	0.000742465	-9.12918	0.0295558
ENSRNOG00000021245.7	RGD1311739	3:123688633-123702748	1301	0.000750136	-22.1585	0.0298193
ENSRNOG00000006905.7	Hectd1	6:72562524-72567238	762	0.000750533	-21.0064	0.0298212
ENSRNOG00000007527.6	Tm2d1	5:116996651-117027224	1108	0.000754138	-2.45665	0.0299317
ENSRNOG00000006709.6	Pzp	4:161804430-161825274	6708	0.000754372	2.29643	0.0299317
ENSRNOG00000011057.7	Mfn1	2:118962935-118974317	3264	0.000761781	3.66034	0.0302116
ENSRNOG00000019598.8	Vegfa	9:17341779-17355685	4340	0.000762792	2.5745	0.0302376
ENSRNOG00000047386.3	Smg1	1:187781574-187792203	5297	0.000766974	5.97639	0.0303751
ENSRNOG00000005794.3	Slc10a1	6:104617125-104624231	2010	0.000770749	2.20507	0.0304962
ENSRNOG00000010474.7	Hmces	4:119815138-119841006	4055	0.000771733	-3.01425	0.0305209
ENSRNOG00000011175.8	Hnrnpa2b1	4:81232833-81238540	5046	0.000779083	2.32791	0.0307687
ENSRNOG00000015145.4	Ppp6c	3:23477956-23510959	4147	0.000779825	-3.2093	0.0307837
ENSRNOG00000016833.7	Ide	1:255914154-255925081	3123	0.000784771	3.96492	0.0309549
ENSRNOG00000017672.7	Akr1c14	17:69805604-69811095	2178	0.000784889	6.80871	0.0309549
ENSRNOG00000015139.7	F12	17:9736576-9745497	3365	0.000794246	-2.90259	0.031237
ENSRNOG00000017900.6	rnf141	1:175631655-175657514	3899	0.00079574	-3.21928	0.0312813
ENSRNOG00000054592.1	AC111831.1	6:8174346-8201909	302	0.00080153	-2.95805	0.0314944
ENSRNOG00000011745.4	Psma1	1:183742397-183744629	385	0.000802346	-5.98553	0.0314985
ENSRNOG00000000397.6	Ccar1	20:32374626-32383870	1322	0.000807032	-3.72889	0.0316375
ENSRNOG00000011523.8	Macroh2a1	17:9282652-9344696	1864	0.000807982	-3.15494	0.0316602
ENSRNOG00000002452.6	Txndc11	10:4620784-4635953	2075	0.000808398	-3.05345	0.0316619
ENSRNOG00000055314.1	Msrb1	10:14105747-14109009	399	0.000809768	-16.2245	0.0316864
ENSRNOG00000046261.2	Acp5	8:23142730-23146209	1318	0.000811493	4.49914	0.0317393
ENSRNOG00000005877.6	Lrpprc	6:7989227-8025650	1710	0.000813287	-18.2553	0.0317948
ENSRNOG00000002358.5	Scpep1	10:76230363-76263902	2061	0.000814612	-24.7487	0.0317974
ENSRNOG00000020678.5	Ifi35	10:89358341-89366845	1324	0.000814645	25.1324	0.0317974
ENSRNOG00000000397.6	Ccar1	20:32373442-32379458	1555	0.000817223	13.776	0.0318608
ENSRNOG00000019915.5	Xrcc1	1:81435060-81441678	1492	0.000818199	-3.0731	0.0318697
ENSRNOG00000001258.3	Snx8	12:16340921-16389505	2613	0.00081978	-4.2384	0.0319118
ENSRNOG00000006467.4	Eif2b2	6:109043879-109051258	2421	0.000822239	-7.55425	0.0319685
ENSRNOG00000017405.7	Raly	3:150322829-150380456	883	0.000830326	-4.00658	0.0322681
ENSRNOG00000047179.3	Aplp2	8:32298411-32300139	1728	0.000831764	4.15081	0.0323093
ENSRNOG00000005424.4	Odc1	6:42852612-42855029	435	0.000839184	-6.50305	0.0325098
ENSRNOG00000020775.8	Cyp2b2	1:83103845-83109003	413	0.000839459	-13.1902	0.0325098
ENSRNOG00000055853.1	Gorasp2	3:56966512-56980840	313	0.000839601	-4.64688	0.0325098
ENSRNOG00000003515.6	Ephx1	13:99271365-99288073	1971	0.000843022	-4.84831	0.0326148
ENSRNOG00000050210.2	RT1-CE10	20:156671-157533	681	0.000843266	-4.23674	0.0326148
ENSRNOG00000009271.6	Smarca4	8:22669768-22739468	4390	0.000843718	-6.48078	0.0326148
ENSRNOG00000008586.8	Aldh1l2	7:26390835-26409945	1369	0.000843847	-3.61031	0.0326148
ENSRNOG00000000541.6	Glo1	20:9272772-9291631	1887	0.000859363	-2.08646	0.0331543
ENSRNOG00000015277.7	Serf2	3:113415638-113417536	734	0.000867712	2.07155	0.0334309
ENSRNOG00000010332.6	Nipsnap3b	5:69843959-69849881	1735	0.000868823	5.78017	0.0334585
ENSRNOG00000014490.5	Bdh2	2:240479115-240482149	416	0.000874632	-33.3773	0.033667
ENSRNOG00000026488.6	Gltpd2	10:57125960-57129686	3444	0.000877847	23.4264	0.0337755
ENSRNOG00000008373.6	Colec11	6:47857765-47890033	1654	0.000878804	-2.76562	0.0337817
ENSRNOG00000018271.6	Scamp4	7:11975255-11982180	331	0.00088828	-12.8515	0.0341152
ENSRNOG00000060438.1	AABR07001634.1	1:54432108-54455845	1744	0.000890213	-2.59017	0.034174
ENSRNOG00000032705.4	Bcl7b	12:24543751-24557113	1761	0.000892336	-19.7147	0.0342246
ENSRNOG00000029360.5	Serinc1	20:38965491-38970378	2623	0.000893432	12.1087	0.0342512
ENSRNOG00000032895.5	Cyp4f4	7:14903843-14907615	2040	0.00091122	-3.2774	0.0348389
ENSRNOG00000020182.5	Mvp	1:198420658-198436700	2886	0.000914981	-4.31349	0.034967
ENSRNOG00000011384.6	Aimp1	2:237727763-237738704	695	0.000917134	4.344	0.03502
ENSRNOG00000003289.8	Lap3	14:70102549-70116882	2044	0.00091914	6.08365	0.0350786
ENSRNOG00000008372.4	Vamp7	12:19026697-19033984	4137	0.000920535	7.40353	0.0351004
ENSRNOG00000046171.3	AABR07035839.1	12:24605877-24620306	1699	0.000926914	3.1459	0.0352804
ENSRNOG00000001783.6	Tra2b	11:82373845-82380904	779	0.000932343	-19.5842	0.0354553
ENSRNOG00000017329.5	Tmem129	14:82350724-82356078	2351	0.000939389	-18.6243	0.0356754
ENSRNOG00000021174.7	Macrod1	1:222438052-222451494	636	0.000946649	-2.10598	0.035871
ENSRNOG00000030391.4	Ei24	8:39254604-39257204	1431	0.000947336	2.76912	0.0358811
ENSRNOG00000033164.5	Cyp2b3	1:83210685-83238694	2690	0.000948469	-3.34348	0.035908
ENSRNOG00000042084.3	Acsm2	1:189373302-189374984	721	0.000950071	7.71161	0.0359367
ENSRNOG00000028685.6	Shf	3:114287717-114307334	1630	0.000952213	-3.1365	0.0359857
ENSRNOG00000042044.3	Stard3	10:86333471-86335934	1045	0.000954364	28.8972	0.036035
ENSRNOG00000009217.4	Fbxo6	5:164955907-164961895	1657	0.000967522	-3.07857	0.0364348
ENSRNOG00000005290.5	Ywhae	10:63914785-63922112	1589	0.000972409	2.19611	0.0365901
ENSRNOG00000010800.6	Hadhb	6:27555371-27589519	2012	0.000972507	-4.74772	0.0365901
ENSRNOG00000018395.7	Usp40	9:95069426-95078235	4713	0.000975071	-2.55807	0.0366703
ENSRNOG00000021405.6	Cyp2c7	1:148099744-148119980	804	0.000976495	-4.26293	0.0366915
ENSRNOG00000009856.7	Sypl1	6:52284432-52286175	1743	0.00098251	2.65213	0.0367042
ENSRNOG00000010967.7	Cdc37l1	1:247110142-247138155	1682	0.000984169	-18.5377	0.0367042
ENSRNOG00000046313.2	Basp1	2:77585648-77632663	1836	0.000984169	15.5676	0.0367042
ENSRNOG00000007315.7	Thoc2	X:128153750-128158348	4598	0.000984169	13.0085	0.0367042
ENSRNOG00000020216.7	Gmpr2	15:34357772-34360829	1703	0.000984169	-16.9355	0.0367042
ENSRNOG00000046313.2	Basp1	2:77585657-77632663	1827	0.000984169	-15.3027	0.0367042
ENSRNOG00000019639.6	Pgpep1	16:20521886-20531396	1742	0.000984169	-18.0886	0.0367042
ENSRNOG00000018456.7	LOC100911664	17:42257018-42269165	5726	0.000984169	17.1299	0.0367042
ENSRNOG00000020440.6	Fads2	1:226138964-226154151	2367	0.000984169	-12.9103	0.0367042
ENSRNOG00000013408.5	Npas2	9:46041618-46081889	3846	0.000984169	16.7598	0.0367042
ENSRNOG00000021890.5	Nob1	19:38397453-38410050	1667	0.000984169	-17.8429	0.0367042
ENSRNOG00000059202.1	AABR07021988.1	13:101727887-101732631	1060	0.000986443	-5.43091	0.0367729
ENSRNOG00000015753.6	Epn1	1:72294151-72311961	2277	0.000988162	-3.62846	0.0368208
ENSRNOG00000019630.7	Hacl1	16:7718782-7726687	1802	0.000989377	17.7505	0.03685
ENSRNOG00000034025.5	Ptprj	3:79232495-79257523	5486	0.000994092	14.2903	0.036977
ENSRNOG00000011282.6	Ppp2r1a	1:60717262-60737507	3209	0.000996593	-6.93913	0.0370376

## Sheet: CT vs. H60
The novel differentially expressed transcripts (P < 0.001, FDR < 0.05, |FC| > 2) length associated with annotated genes identified in liver in CT vs. H60.
Gene ID	Gene name	Position	Transcript length (bp*)	P-value	FC	FDR
ENSRNOG00000056457.1	Gpd1	7:141370473_141377972	2932	3.01541e-35	-10.673	2.69412e-31
ENSRNOG00000039744.5	RT1-CE4	20:4955017_4956658	1641	4.43711e-33	313.382	3.30361e-29
ENSRNOG00000012843.4	Aspg	6:136682125_136701674	2678	5.06615e-29	-219.87	3.01757e-25
ENSRNOG00000017418.5	Rps3	1:164435868_164436978	348	2.74152e-27	-227.474	1.53088e-23
ENSRNOG00000030021.3	Ccl6	10:70797123_70802881	1473	1.23198e-25	-54.6392	6.11505e-22
ENSRNOG00000012026.6	Psmc2	4:9866944_9873361	1282	1.89131e-25	-137.468	8.89362e-22
ENSRNOG00000020845.6	Tyrobp	1:88875374_88879305	605	2.22282e-25	-27.0819	9.92989e-22
ENSRNOG00000058484.1	Anp32a	AABR07024206.1:5607_8632	432	5.57152e-23	-21.2031	2.16429e-19
ENSRNOG00000015703.6	Hypk	3:113423681_113425063	618	2.59925e-22	-7.82432	9.28922e-19
ENSRNOG00000020308.6	Ech1	1:87009729_87016018	1187	5.93312e-21	13.9446	1.96331e-17
ENSRNOG00000057623.1	Copb1	1:183695467_183696022	555	6.65962e-21	-28.5325	2.12501e-17
ENSRNOG00000008047.7	Khk	6:26810564_26820959	1444	1.22843e-20	-6.13634	3.78462e-17
ENSRNOG00000010558.7	Ppif	16:1980509_1985916	1277	2.79041e-20	-36.5445	7.79092e-17
ENSRNOG00000014289.7	Arpc2	9:81545702_81548872	561	1.12643e-19	-49.5116	2.96002e-16
ENSRNOG00000021177.5	Cox8a	1:222466429_222466896	467	3.1629e-19	-5.00553	7.8497e-16
ENSRNOG00000009263.8	Ifi27	6:127327768_127334441	1001	3.99824e-19	-4.56815	9.65467e-16
ENSRNOG00000017418.5	Rps3	1:164440065_164441205	211	5.3542e-19	-10.6485	1.25887e-15
ENSRNOG00000020763.8	Snrnp70	1:101367437_101368460	945	1.22273e-18	-573.105	2.73112e-15
ENSRNOG00000059330.1	AABR07004549.1	1:147420485_147427835	3291	1.70338e-18	8.87492	3.71191e-15
ENSRNOG00000011599.7	Gldc	1:248297326_248299766	964	5.71811e-18	-12.409	1.1353e-14
ENSRNOG00000060338.1	Lipc	8:77272343_77278375	810	1.39333e-17	-35.7433	2.64866e-14
ENSRNOG00000019551.5	Psmb6	10:57133494_57133828	334	4.92279e-17	-3.77954	8.29862e-14
ENSRNOG00000014806.7	Pnkd	9:81566021_81568532	676	2.05046e-16	-11.4266	3.18831e-13
ENSRNOG00000057626.1	Kif1b	5:165946096_165950724	716	2.07619e-16	-10.5409	3.18831e-13
ENSRNOG00000002828.7	Tob1	10:81911716_81915727	2118	2.10544e-16	9.85091	3.18831e-13
ENSRNOG00000047931.2	Tmsb4x	X:28593284_28595402	721	2.89668e-16	-6.13111	4.24268e-13
ENSRNOG00000009488.4	Cyp7a1	5:19358243_19368451	4054	3.2406e-16	-218.336	4.59573e-13
ENSRNOG00000037911.2	LOC680227	X:74331445_74338119	1817	4.04337e-16	15.5599	5.6446e-13
ENSRNOG00000018057.7	Mrpl2	9:16643618_16645311	719	7.88098e-16	-35.7084	1.03548e-12
ENSRNOG00000001420.8	Fis1	12:22750445_22754605	835	8.20677e-16	-2.54984	1.04748e-12
ENSRNOG00000048275.2	RGD1309350	1:213577113_213580647	976	1.17173e-15	-2.7292	1.47448e-12
ENSRNOG00000028884.4	Atp5mg	8:49221754_49227359	512	2.43997e-15	-17.4114	2.94594e-12
ENSRNOG00000002911.5	Alb	14:19175509_19177539	967	4.63376e-15	-16.9231	5.0937e-12
ENSRNOG00000000571.6	Psap	20:29852568_29856878	1713	4.67495e-15	-405.412	5.0937e-12
ENSRNOG00000005924.6	Dstn	3:138050540_138051502	962	6.36734e-15	-8.61422	6.7725e-12
ENSRNOG00000004814.6	Elob	10:13162445_13166238	866	1.2916e-14	-11.1568	1.31817e-11
ENSRNOG00000009094.4	Nudt4	7:36643666_36660340	3374	2.21741e-14	120.25	2.1076e-11
ENSRNOG00000017251.6	Wdr55	18:29601610_29602707	462	2.60156e-14	-7.52898	2.4467e-11
ENSRNOG00000058393.1	Taf15	10:70720165_70721894	485	2.89614e-14	-4.38897	2.69537e-11
ENSRNOG00000019974.6	Uba52	16:20668862_20671127	612	4.16351e-14	-4.30346	3.64695e-11
ENSRNOG00000043105.3	Lyrm2	5:48047888_48050192	1577	4.29278e-14	-73.3156	3.72367e-11
ENSRNOG00000000853.7	Aif1	20:5161332_5163252	677	5.78783e-14	-6.29395	4.97224e-11
ENSRNOG00000016961.4	Rps27	2:189572175_189573357	419	6.16858e-14	-37.1562	5.24887e-11
ENSRNOG00000012087.6	Ufsp2	16:49465946_49471610	826	8.69315e-14	-18.1602	7.32726e-11
ENSRNOG00000010170.5	Tubb4b	3:2441578_2442531	953	1.02053e-13	-2.64239	8.49174e-11
ENSRNOG00000007650.5	Cd63	7:3332742_3335590	916	1.02648e-13	-3.44131	8.49174e-11
ENSRNOG00000012748.4	Vamp8	4:100249759_100255143	1039	1.19206e-13	-2.73752	9.68227e-11
ENSRNOG00000018420.7	Slc22a7	9:16930263_16931844	1071	1.21871e-13	-71.3422	9.72193e-11
ENSRNOG00000019041.6	Psme1	15:34257166_34258950	823	1.31979e-13	-22.3385	1.04351e-10
ENSRNOG00000045636.2	Fasn	10:109985403_109997391	8520	1.56309e-13	-17.1161	1.22504e-10
ENSRNOG00000001148.6	Rplp0	12:46791344_46794804	1283	1.74885e-13	5.94147	1.34699e-10
ENSRNOG00000003228.5	Mid1ip1	X:13114553_13116261	1708	1.83612e-13	-8.93303	1.40212e-10
ENSRNOG00000002115.6	Sod1	11:30363243_30368989	819	2.3035e-13	5.81217	1.74412e-10
ENSRNOG00000010189.8	Rps24	16:758418_762092	408	2.4647e-13	-2.37041	1.85049e-10
ENSRNOG00000006652.6	Ddx1	6:38422887_38425636	855	3.54421e-13	-11.3692	2.57445e-10
ENSRNOG00000054140.1	Myl6	7:2906136_2908864	651	3.71765e-13	-3.47652	2.67866e-10
ENSRNOG00000024705.5	Rarres2	4:78205789_78208850	783	4.37104e-13	-5.51337	3.11985e-10
ENSRNOG00000006965.6	Aff4	10:38771257_38774607	2704	4.57985e-13	-5.80474	3.22194e-10
ENSRNOG00000018339.8	Cabp2	1:219329442_219335750	1620	4.63242e-13	-4.699	3.23346e-10
ENSRNOG00000012650.5	Mrpl3	8:113622714_113626893	754	5.47916e-13	-23.7121	3.79485e-10
ENSRNOG00000024170.5	Phf5a	7:123095269_123101869	891	6.52339e-13	-5.62667	4.4491e-10
ENSRNOG00000055023.1	AABR07006258.2	1:226258377_226259996	378	9.038e-13	-2.68559	5.9375e-10
ENSRNOG00000014501.6	Zfp638	4:115683302_115685484	513	9.14716e-13	-88.8158	5.96535e-10
ENSRNOG00000006532.5	H3f3a	10:104573643_104575890	1675	9.84375e-13	-3.02268	6.37311e-10
ENSRNOG00000033747.5	Sp110	9:92593889_92600431	630	1.05823e-12	-29.7382	6.75339e-10
ENSRNOG00000004284.4	Btg1	7:37812514_37815088	1778	1.26473e-12	3.70046	7.95753e-10
ENSRNOG00000001415.6	Ap1s1	12:22665111_22676079	1348	1.79749e-12	-4.36298	1.10756e-09
ENSRNOG00000009832.6	Slc39a14	15:51980675_51989674	6174	1.8427e-12	-10.9761	1.12006e-09
ENSRNOG00000024705.5	Rarres2	4:78205789_78208850	783	1.84285e-12	-5.06321	1.12006e-09
ENSRNOG00000013011.7	Dnajb4	2:257394640_257405989	2349	1.94469e-12	10.1039	1.17397e-09
ENSRNOG00000021317.5	Cct2	7:60109973_60112162	616	2.18578e-12	-45.3333	1.30192e-09
ENSRNOG00000000201.7	Gsta5	8:85553610_85560975	1411	2.29967e-12	-9.39469	1.36069e-09
ENSRNOG00000018168.7	Klc4	9:16656467_16661464	1010	2.32806e-12	-7.94481	1.36842e-09
ENSRNOG00000015591.5	Cndp2	18:81521958_81525928	1355	2.89777e-12	-6.45022	1.68118e-09
ENSRNOG00000014078.7	Ndufb8	1:264298598_264303796	809	4.09378e-12	-3.35386	2.32968e-09
ENSRNOG00000022268.6	Pnpla3	7:125045206_125057547	4209	4.32439e-12	-65.2706	2.44534e-09
ENSRNOG00000013223.6	Fah	1:146713620_146727552	5503	4.89048e-12	-5.41042	2.74805e-09
ENSRNOG00000053790.1	AABR07036007.1	12:30444175_30446118	383	4.92437e-12	-2.18831	2.7498e-09
ENSRNOG00000009982.6	Pnp	15:27875910_27881917	365	8.03335e-12	-32.8463	4.29784e-09
ENSRNOG00000006675.5	Fabp1	4:99062975_99066839	1186	1.07784e-11	-3.82451	5.63155e-09
ENSRNOG00000002186.4	Nudt9	14:7036809_7045576	876	1.09876e-11	-8.50787	5.70751e-09
ENSRNOG00000017446.5	Ndufs8	1:219141288_219144635	776	1.33905e-11	-2.92435	6.87574e-09
ENSRNOG00000009550.7	Sqle	7:99619851_99625874	1726	1.35347e-11	-86.3964	6.91005e-09
ENSRNOG00000017571.5	Ndufa2	18:29585670_29587784	584	1.54219e-11	-7.54906	7.74084e-09
ENSRNOG00000000201.7	Gsta5	8:85563790_85565202	641	1.55835e-11	-6.7519	7.77828e-09
ENSRNOG00000018358.4	Nt5dc2	16:7220435_7221484	544	1.59756e-11	-28.7911	7.89727e-09
ENSRNOG00000009884.6	Lgals1	7:120153072_120156291	618	1.87991e-11	-21.6656	9.03014e-09
ENSRNOG00000020178.7	Cope	16:20863110_20873380	1118	1.9652e-11	-3.92726	9.38934e-09
ENSRNOG00000004740.7	Mmadhc	3:35783298_35801614	1727	2.09503e-11	-12.7525	9.95643e-09
ENSRNOG00000017595.7	Rsu1	17:80388820_80389256	367	2.42481e-11	10.3117	1.14023e-08
ENSRNOG00000023533.6	Dipk1a	14:2860964_2864162	409	2.5424e-11	-871.576	1.18796e-08
ENSRNOG00000017235.6	Atp6v0d1	19:37481769_37486982	1274	2.5529e-11	-8.71604	1.18796e-08
ENSRNOG00000015844.4	Snrpd2	1:80058321_80059996	651	3.3037e-11	-45.8525	1.51369e-08
ENSRNOG00000006939.7	Ndufa7	7:18683515_18696330	511	3.39585e-11	-5.01904	1.54797e-08
ENSRNOG00000012999.7	Phb2	4:157234848_157235381	533	3.4151e-11	-20.0385	1.54884e-08
ENSRNOG00000012641.5	Sfr1	1:267506273_267509350	1305	3.44985e-11	21.0764	1.5567e-08
ENSRNOG00000047052.2	Clpp	9:10048708_10054388	1025	3.4813e-11	-3.06006	1.563e-08
ENSRNOG00000003689.6	Nono	X:71339813_71342228	1135	4.6151e-11	-16.3495	1.98238e-08
ENSRNOG00000007392.3	Atp6v1f	4:56744536_56747656	667	4.88125e-11	-25.8911	2.07674e-08
ENSRNOG00000042653.2	Ndufaf8	10:109278704_109280863	460	6.03601e-11	-201.486	2.50831e-08
ENSRNOG00000057623.1	Copb1	1:183695467_183729578	3354	7.30165e-11	9.11027	3.0063e-08
ENSRNOG00000047393.2	Krt18	7:143632220_143633260	734	7.67117e-11	-7.92909	3.14395e-08
ENSRNOG00000003497.4	Thoc6	10:12994409_12995674	658	8.064e-11	-61.6293	3.2749e-08
ENSRNOG00000039980.4	Slc25a5	X:123406693_123407721	692	9.93611e-11	-19.7692	3.96674e-08
ENSRNOG00000016509.6	Usp10	19:52608304_52608820	516	9.94943e-11	-7.79314	3.96674e-08
ENSRNOG00000002642.7	Ptges3	7:2495460_2497347	1263	9.98955e-11	-4.75105	3.96674e-08
ENSRNOG00000053362.1	Gabarapl1	4:163293617_163302880	1814	1.10609e-10	3.12488	4.37271e-08
ENSRNOG00000021035.6	Rpl18	1:101700880_101703557	657	1.15311e-10	-2.13595	4.53854e-08
ENSRNOG00000042237.3	Tm6sf2	16:21092307_21096528	1238	1.17983e-10	-7.4022	4.61702e-08
ENSRNOG00000020115.7	Ilkap	9:98514583_98521552	785	1.18339e-10	-53.9713	4.61702e-08
ENSRNOG00000008459.4	Anapc13	8:111107353_111115774	620	1.25675e-10	-21.5137	4.88195e-08
ENSRNOG00000005614.7	Txn2	7:119144183_119158241	1335	1.31041e-10	-3.19365	5.06744e-08
ENSRNOG00000015774.5	Mreg	9:79489816_79545333	2891	1.34955e-10	4.31158	5.17491e-08
ENSRNOG00000008921.4	Dynll2	10:75262528_75270697	2467	1.47809e-10	-5.44544	5.61957e-08
ENSRNOG00000011979.6	Mrps24	14:85947762_85951935	832	1.49238e-10	-4.40463	5.64986e-08
ENSRNOG00000009263.8	Ifi27	6:127331852_127334435	479	2.20318e-10	-1165.98	8.27071e-08
ENSRNOG00000046889.3	Dbi	13:36147664_36156112	604	2.28979e-10	7.11273	8.55989e-08
ENSRNOG00000011414.5	Psmc3	3:79877495_79882324	1329	2.36593e-10	-3.24099	8.7426e-08
ENSRNOG00000033164.5	Cyp2b3	1:83163002_83194038	1015	2.61314e-10	-28.98	9.56317e-08
ENSRNOG00000021748.7	Las1l	X:65081590_65081965	375	2.62239e-10	-48.9546	9.56317e-08
ENSRNOG00000050585.2	Pgam1	1:261158198_261165814	1810	2.65933e-10	11.2497	9.65112e-08
ENSRNOG00000021118.5	Nomo1	1:102067826_102068875	758	3.15433e-10	-9.65134	1.13182e-07
ENSRNOG00000053362.1	Gabarapl1	4:163293617_163302881	1815	3.23644e-10	3.05636	1.15664e-07
ENSRNOG00000015989.5	Mrpl32	17:53102513_53105410	798	3.62856e-10	-5.05744	1.29161e-07
ENSRNOG00000029549.4	Eci3	17:30620637_30639941	2066	4.12891e-10	-58.5977	1.45477e-07
ENSRNOG00000025936.5	Rpl6	12:40877573_40879259	1686	4.13578e-10	-8.82936	1.45477e-07
ENSRNOG00000057823.1	Ubc	12:36638222_36642734	2779	4.30524e-10	6.28876	1.50844e-07
ENSRNOG00000060825.1	Ccm2	14:86858696_86859424	728	4.56502e-10	-18.6028	1.58767e-07
ENSRNOG00000011421.7	Smap2	5:139885250_139931410	2958	4.56693e-10	-57.0509	1.58767e-07
ENSRNOG00000007886.4	Orm1	5:79179416_79182882	1082	4.67815e-10	4.44614	1.61378e-07
ENSRNOG00000014241.7	Ece1	5:156311470_156318671	2672	5.36202e-10	-4.83294	1.83552e-07
ENSRNOG00000058340.1	Krt79	7:143528202_143529084	689	5.591e-10	-42.0516	1.89935e-07
ENSRNOG00000017693.7	Slc2a5	5:167172588_167174210	1055	6.72166e-10	-8.85794	2.2593e-07
ENSRNOG00000006326.7	Atraid	6:26680597_26681291	503	7.1879e-10	-63.671	2.38737e-07
ENSRNOG00000018289.6	Park7	5:167988381_168000095	887	8.06453e-10	-2.74651	2.63254e-07
ENSRNOG00000008461.6	Smdt1	7:123578711_123582352	1146	8.07338e-10	-2.28078	2.63254e-07
ENSRNOG00000016349.4	Gnmt	9:16567914_16568633	546	8.2909e-10	-208.799	2.69364e-07
ENSRNOG00000023376.4	Riok3	18:3587172_3591110	2135	8.42712e-10	-27.8774	2.72797e-07
ENSRNOG00000034013.5	Acaca	10:71718001_71721985	2493	8.47701e-10	-4.18604	2.73422e-07
ENSRNOG00000010478.7	LOC299282	6:128048108_128056223	2452	8.673e-10	-4.32756	2.78737e-07
ENSRNOG00000011955.4	AABR07026997.1	17:9233446_9234863	508	8.72587e-10	-2.51457	2.79431e-07
ENSRNOG00000007395.6	Baat	5:64762219_64777822	13613	8.9974e-10	10.4397	2.87097e-07
ENSRNOG00000037911.2	LOC680227	X:74330154_74330812	658	9.50408e-10	5.41646	3.02186e-07
ENSRNOG00000012290.4	Gchfr	3:110975794_110979965	767	9.67685e-10	-3.09794	3.05505e-07
ENSRNOG00000013137.4	Clec4f	4:115322051_115323363	812	9.92053e-10	-23.5437	3.12095e-07
ENSRNOG00000004537.6	Rxrg	13:85849447_85868554	930	1.05023e-09	-13.4301	3.29237e-07
ENSRNOG00000000658.7	Acacb	12:48132532_48136002	646	1.09191e-09	-21.7636	3.41106e-07
ENSRNOG00000008465.6	Tmem176b	4:78450389_78455156	1585	1.26415e-09	-5.61858	3.92899e-07
ENSRNOG00000015354.8	Aox1	9:64995340_65007990	3030	1.29931e-09	-11.5324	4.00299e-07
ENSRNOG00000019294.3	Stk16	9:82411012_82414338	1578	1.35625e-09	-7.32563	4.14979e-07
ENSRNOG00000047656.2	Gaa	10:108411556_108413059	910	1.37127e-09	-60.1887	4.18143e-07
ENSRNOG00000014522.5	Mlycd	19:52032875_52048793	2105	1.40272e-09	-3.78822	4.26278e-07
ENSRNOG00000001189.6	Sik1	20:10668410_10680352	5053	1.46509e-09	13.3455	4.42226e-07
ENSRNOG00000008390.7	Dcun1d5	8:5442599_5458170	875	1.56822e-09	-47.4384	4.70176e-07
ENSRNOG00000010218.7	Eif5	6:136003077_136004727	664	1.58594e-09	31.3407	4.73898e-07
ENSRNOG00000001211.4	Gatd3a	20:11249728_11252479	874	1.60686e-09	-9.95831	4.7855e-07
ENSRNOG00000047503.2	Apoc3	8:50529324_50530683	306	1.76241e-09	-24.6283	5.23131e-07
ENSRNOG00000008140.6	Rpl15	15:8190410_8190819	409	1.90399e-09	-8.52661	5.63284e-07
ENSRNOG00000029333.4	Echdc2	5:127788448_127789568	577	1.96375e-09	-20.0123	5.77141e-07
ENSRNOG00000052604.1	LOC100361907	13:56747023_56747705	301	1.97922e-09	3.71763	5.79781e-07
ENSRNOG00000012751.7	Tm9sf2	15:108578408_108579540	1132	2.34195e-09	-13.4312	6.79354e-07
ENSRNOG00000010362.7	Anxa2	8:75723254_75723597	343	2.55007e-09	-84.2454	7.34955e-07
ENSRNOG00000055647.1	Rbfa	18:76704176_76707521	988	2.90404e-09	-5.54344	8.26517e-07
ENSRNOG00000012366.6	Mesd	1:146041591_146043102	1511	3.05351e-09	-37.7737	8.57912e-07
ENSRNOG00000016891.7	Uimc1	17:10065878_10090252	710	3.27712e-09	-36.3386	9.14982e-07
ENSRNOG00000003977.5	Dusp1	10:16970625_16973428	1946	3.77082e-09	32.4244	1.04954e-06
ENSRNOG00000048193.2	Hnrnph3	20:27168435_27212773	1153	3.9465e-09	-3.00014	1.09503e-06
ENSRNOG00000021079.4	Fxyd1	1:89484195_89488433	746	3.96604e-09	-3.3777	1.09705e-06
ENSRNOG00000026420.5	Iqcg	11:71005169_71008579	1466	4.31181e-09	-10.3029	1.18535e-06
ENSRNOG00000021174.7	Macrod1	1:222438052_222451494	636	4.3919e-09	-4.49725	1.20366e-06
ENSRNOG00000006655.7	Plrg1	2:182053448_182056734	697	4.5846e-09	-5.90374	1.24502e-06
ENSRNOG00000014964.8	Hp	19:42096135_42101228	1739	4.99501e-09	-4.49669	1.34828e-06
ENSRNOG00000004726.7	Mapkapk2	13:47785148_47831110	2538	5.16658e-09	16.3207	1.38206e-06
ENSRNOG00000005183.6	Rtf1	3:111478361_111514059	892	5.18381e-09	-80.9041	1.38253e-06
ENSRNOG00000012594.7	Sugt1	15:61892053_61914260	974	5.8063e-09	-71.7713	1.53645e-06
ENSRNOG00000018645.5	Rpsa	8:128806762_128810587	1588	7.40527e-09	-4.21347	1.91763e-06
ENSRNOG00000000150.7	Dnajc1	17:84986990_84990125	835	7.68847e-09	-23.0457	1.97961e-06
ENSRNOG00000004172.6	Pdk2	10:82841486_82844071	495	7.87153e-09	-7.54193	2.01513e-06
ENSRNOG00000016660.5	Cox5b	9:43259610_43261396	445	7.99183e-09	-3.10721	2.04009e-06
ENSRNOG00000016456.7	Il33	1:248134476_248138695	575	8.47771e-09	75.7251	2.13966e-06
ENSRNOG00000026646.5	Ndufs5	5:141390577_141390789	212	8.87404e-09	-18.8464	2.23338e-06
ENSRNOG00000025711.6	Spout1	3:8750638_8752898	2179	8.92198e-09	-10.8461	2.23914e-06
ENSRNOG00000002536.6	C1galt1c1	X:124921727_124926183	1325	9.43295e-09	-14.794	2.35415e-06
ENSRNOG00000025629.6	Prpf3	2:197946966_197953211	996	9.46822e-09	-7.56031	2.35637e-06
ENSRNOG00000029668.4	Wfdc21	10:71047238_71053200	460	1.11345e-08	-7.70137	2.71808e-06
ENSRNOG00000003500.4	Apoa2	13:89596872_89598802	552	1.17939e-08	-2.22285	2.8712e-06
ENSRNOG00000055245.1	LOC103690477	8:131603408_131603925	251	1.22746e-08	-10.3707	2.9801e-06
ENSRNOG00000018899.8	C5	3:14207043_14229109	915	1.3071e-08	11.96	3.1563e-06
ENSRNOG00000003563.6	Blmh	10:63197366_63198309	943	1.59665e-08	-14.2631	3.80407e-06
ENSRNOG00000050510.2	Rab1b	1:220480833_220491480	1858	1.61538e-08	-95.4391	3.83847e-06
ENSRNOG00000003264.5	Nat9	10:103732177_103733404	619	1.69457e-08	-50.5983	4.00096e-06
ENSRNOG00000007629.7	Sf3a3	5:142721271_142722366	329	1.69741e-08	-8.39752	4.00096e-06
ENSRNOG00000007793.6	Pnrc1	5:48501381_48504813	2005	1.70168e-08	3.82267	4.00096e-06
ENSRNOG00000046112.2	Dedd2	1:82072543_82089018	2338	1.82529e-08	7.34735	4.28032e-06
ENSRNOG00000019977.7	Ptprf	5:137036331_137041599	3685	1.86844e-08	-4.04366	4.35863e-06
ENSRNOG00000007457.4	Serping1	3:72160928_72164196	1250	1.92829e-08	-26.1478	4.47489e-06
ENSRNOG00000010887.6	RGD1309534	8:13838510_13845755	1969	2.06488e-08	-10.9818	4.75481e-06
ENSRNOG00000011684.7	Auh	17:12310159_12405211	1364	2.46357e-08	-3.3955	5.55828e-06
ENSRNOG00000003881.6	Nit1	13:89725842_89743848	1693	2.60375e-08	-4.78503	5.84504e-06
ENSRNOG00000003500.4	Apoa2	13:89596882_89598802	539	2.67727e-08	-2.22604	5.99501e-06
ENSRNOG00000022153.6	Tmem134	1:219378874_219379596	500	2.73686e-08	-15.6613	6.11311e-06
ENSRNOG00000050360.2	Urad	12:9452619_9456970	4351	2.82643e-08	-3.14282	6.28178e-06
ENSRNOG00000000527.6	Mtch1	20:6937334_6938360	776	2.86505e-08	-116.436	6.33609e-06
ENSRNOG00000019277.8	Vdac3	16:74292390_74308910	1436	3.06505e-08	-6.47072	6.72842e-06
ENSRNOG00000059753.1	Gys2	4:176638625_176646463	828	3.07937e-08	-5.39741	6.74329e-06
ENSRNOG00000000658.7	Acacb	12:48127147_48130831	2422	3.33348e-08	-4.79333	7.24647e-06
ENSRNOG00000002478.5	Insig2	13:37264792_37292717	2640	3.48844e-08	5.8483	7.56491e-06
ENSRNOG00000019598.8	Vegfa	9:17340325_17355685	4344	3.49961e-08	6.16813	7.56629e-06
ENSRNOG00000010083.5	Prpsap1	10:105430516_105436497	1157	3.72088e-08	-8.5086	7.93417e-06
ENSRNOG00000002795.7	Cog1	10:102178213_102180586	588	3.74587e-08	-20.0028	7.96844e-06
ENSRNOG00000000913.8	Gusb	12:30202051_30215585	2483	3.76233e-08	19.9071	7.98445e-06
ENSRNOG00000019946.5	Gmppa	9:82634811_82639909	1394	3.79511e-08	-4.42022	8.03493e-06
ENSRNOG00000047714.2	Tmem37	13:36094491_36101165	1105	4.02656e-08	-3.55779	8.44491e-06
ENSRNOG00000003515.6	Ephx1	13:99271365_99300613	1789	4.05734e-08	-13.4572	8.48953e-06
ENSRNOG00000021125.8	Prdx5	1:222164442_222167594	982	4.318e-08	-2.84725	8.97191e-06
ENSRNOG00000015139.7	F12	17:9736576_9744498	2272	4.35868e-08	-3.65177	9.03541e-06
ENSRNOG00000002358.5	Scpep1	10:76230363_76231286	923	4.44262e-08	-31.1334	9.18811e-06
ENSRNOG00000004364.4	Babam2	6:25666651_25750093	778	4.57126e-08	-7.95102	9.41058e-06
ENSRNOG00000012738.7	Eif3m	3:94989967_94995302	645	4.69636e-08	-58.8849	9.62889e-06
ENSRNOG00000013211.4	Chchd3	4:60080516_60132381	913	4.69886e-08	-6.84114	9.62889e-06
ENSRNOG00000024309.4	Cox6b1	1:89075925_89084859	682	4.82271e-08	-2.04664	9.84165e-06
ENSRNOG00000046316.1	Tomm6	9:15312732_15315824	2235	4.84153e-08	-2.77425	9.85345e-06
ENSRNOG00000000893.6	Tmem248	12:29931730_29942766	3141	4.87501e-08	46.6854	9.89903e-06
ENSRNOG00000020990.2	Fgf21	1:101595347_101597038	1074	5.30989e-08	15.2245	1.0685e-05
ENSRNOG00000015144.5	Ist1	19:41979252_41990953	2172	5.33793e-08	-47.4898	1.07172e-05
ENSRNOG00000017396.6	Marchf5	1:255862208_255865434	3226	5.43162e-08	-10.019	1.08566e-05
ENSRNOG00000007336.7	Churc1	6:99817430_99831614	373	5.78941e-08	-5.71112	1.14437e-05
ENSRNOG00000001285.8	Atp2a2	12:39553902_39603327	7372	6.23167e-08	8.71216	1.22636e-05
ENSRNOG00000002393.7	Eprs	13:103336009_103354352	1248	6.32626e-08	-5.24089	1.24224e-05
ENSRNOG00000018129.7	Ndufab1	1:192047430_192057701	1180	6.55994e-08	-2.41255	1.2853e-05
ENSRNOG00000005102.6	Washc3	7:28781788_28809215	518	6.62707e-08	-41.6687	1.29561e-05
ENSRNOG00000019164.7	Uba1	X:1723134_1724045	653	7.08514e-08	-13.3827	1.37315e-05
ENSRNOG00000009020.7	Tsta3	7:116958391_116959606	624	7.12382e-08	-50.8417	1.37766e-05
ENSRNOG00000014684.3	Npr1	2:189840220_189841218	874	7.21411e-08	-27.9363	1.3921e-05
ENSRNOG00000008981.7	Pdcd6ip	8:121916184_121920738	3673	7.60591e-08	-10.514	1.45826e-05
ENSRNOG00000001316.7	Anapc5	12:39241883_39242915	887	7.67e-08	-63.3879	1.4674e-05
ENSRNOG00000019811.5	LOC100362432	16:8349860_8350134	274	8.92459e-08	-3.79737	1.68577e-05
ENSRNOG00000050860.2	Abcb11	3:55475203_55544894	8705	9.40203e-08	2.61542	1.7722e-05
ENSRNOG00000002818.7	Eftud2	10:90932067_90932547	480	9.58416e-08	-60.5556	1.80273e-05
ENSRNOG00000014294.7	Ptpn6	4:157239131_157240627	778	9.91867e-08	-12.2982	1.86173e-05
ENSRNOG00000007532.7	RGD1305178	3:9813911_9822199	1318	1.02682e-07	-48.0671	1.9233e-05
ENSRNOG00000016478.7	Eif5a	10:56529487_56531615	409	1.08885e-07	-156.769	2.02862e-05
ENSRNOG00000057855.1	F5	13:82521913_82536385	3229	1.08986e-07	3.52591	2.02862e-05
ENSRNOG00000038370.4	AABR07034632.1	11:81711719_81712574	298	1.11588e-07	-5.48807	2.06844e-05
ENSRNOG00000008845.5	Pdrg1	3:148487055_148493271	1241	1.13332e-07	-3.61956	2.0964e-05
ENSRNOG00000038883.4	LOC294154	20:7331310_7364066	3060	1.14379e-07	-6.33721	2.1114e-05
ENSRNOG00000020602.7	Ndufa13	16:21281860_21282349	402	1.18096e-07	-4.93333	2.17104e-05
ENSRNOG00000018402.7	Apoc2	1:80588549_80590137	953	1.18702e-07	-4.35911	2.17772e-05
ENSRNOG00000017730.6	Psmd1	9:93146575_93155077	722	1.20221e-07	-2.89192	2.19656e-05
ENSRNOG00000023593.7	Upf2	17:76277650_76287225	1247	1.2094e-07	-48.3908	2.20517e-05
ENSRNOG00000005602.5	Mthfd1	6:99340121_99351658	2166	1.24056e-07	-5.115	2.25739e-05
ENSRNOG00000028384.5	Npepl1	3:172204138_172207687	1324	1.25609e-07	-7.28046	2.28101e-05
ENSRNOG00000031453.5	Manbal	3:153491140_153520738	1096	1.27176e-07	-5.6862	2.30478e-05
ENSRNOG00000028650.7	Inf2	6:137177563_137180626	855	1.28826e-07	-8.59441	2.32995e-05
ENSRNOG00000018755.6	Acss2	3:151067975_151075872	1985	1.30591e-07	71.9545	2.35235e-05
ENSRNOG00000002783.8	Serpinc1	13:78818001_78820369	321	1.35347e-07	-59.5771	2.42823e-05
ENSRNOG00000058412.1	Morf4l1	8:97473936_97474160	224	1.36572e-07	-8.84944	2.4453e-05
ENSRNOG00000020182.5	Mvp	1:198420805_198422946	745	1.40532e-07	-5.46714	2.50375e-05
ENSRNOG00000047821.1	Smlr1	1:20856025_20877716	724	1.40678e-07	-2.78711	2.50375e-05
ENSRNOG00000013791.5	Enpp3	1:21669515_21684609	1154	1.4511e-07	-9.62983	2.56995e-05
ENSRNOG00000008857.7	Adamts10	7:18436099_18439012	1161	1.46617e-07	-43.1736	2.58883e-05
ENSRNOG00000001049.7	Tpt1	15:57893479_57895199	1021	1.53218e-07	6.71848	2.69473e-05
ENSRNOG00000017781.6	Dnajc7	10:88498237_88504935	876	1.53764e-07	-6.0127	2.69903e-05
ENSRNOG00000056156.1	Maco1	5:153122329_153134825	2703	1.54775e-07	-11.3353	2.71145e-05
ENSRNOG00000018456.7	LOC100911664	17:42266651_42269165	2514	1.55883e-07	5.55412	2.7255e-05
ENSRNOG00000005331.4	Vapb	3:171868282_171869667	1385	1.58938e-07	-5.97418	2.77349e-05
ENSRNOG00000038001.3	Slc25a1	11:87206170_87207380	1023	1.59657e-07	-17.7191	2.78061e-05
ENSRNOG00000028105.5	Hars1	18:29611546_29613230	727	1.63009e-07	-39.0514	2.82798e-05
ENSRNOG00000020467.4	Nrep	18:26183752_26189986	1998	1.65201e-07	-6.88232	2.86044e-05
ENSRNOG00000045637.1	Rnf14	18:31467111_31468860	1749	1.66738e-07	-19.3044	2.87591e-05
ENSRNOG00000006388.5	Pygl	6:92597125_92618641	2932	1.82477e-07	-3.06772	3.12325e-05
ENSRNOG00000049771.1	Gstt1	20:13799054_13816546	1015	1.95343e-07	-4.13612	3.33444e-05
ENSRNOG00000008214.5	Fbxo9	8:85388329_85392613	841	1.96666e-07	-7.01959	3.34688e-05
ENSRNOG00000020676.3	Ppp1r14a	1:87228406_87232868	730	2.04041e-07	-4.31452	3.45962e-05
ENSRNOG00000024964.7	Nufip2	10:65167742_65200332	11204	2.17379e-07	14.7611	3.6714e-05
ENSRNOG00000014453.6	Anxa5	2:123162460_123166781	876	2.25684e-07	-15.7886	3.79732e-05
ENSRNOG00000011052.6	Gars	4:85269888_85276080	894	2.26995e-07	-9.75583	3.81219e-05
ENSRNOG00000011861.6	Aadat	16:32831580_32848047	1213	2.43888e-07	-14.0205	4.08056e-05
ENSRNOG00000017417.6	Gabarap	10:56601149_56604553	1431	2.46751e-07	-15.4927	4.11418e-05
ENSRNOG00000010984.6	Anxa11	16:3867143_3874139	1210	2.55615e-07	-3.00827	4.24497e-05
ENSRNOG00000053210.1	Zc3h11a	13:50196008_50230095	9111	2.56504e-07	24.1193	4.25183e-05
ENSRNOG00000017036.3	Sec11c	18:61490014_61506514	834	2.60152e-07	-10.9073	4.28853e-05
ENSRNOG00000003011.7	Gadd45gip1	19:25948666_25949870	1204	2.60638e-07	-7.91495	4.28853e-05
ENSRNOG00000020775.8	Cyp2b2	1:83111845_83119578	1384	2.77336e-07	-3.98372	4.54653e-05
ENSRNOG00000017821.7	Agxt2	2:60372783_60379454	1158	2.78138e-07	-12.6653	4.55132e-05
ENSRNOG00000021240.4	Atrn	3:123493991_123537923	3756	2.80683e-07	5.41385	4.58457e-05
ENSRNOG00000020602.7	Ndufa13	16:21275191_21281201	292	2.8505e-07	-3.9793	4.63895e-05
ENSRNOG00000057464.1	Fmr1	X:154684923_154686047	1124	2.93876e-07	-11.5279	4.76329e-05
ENSRNOG00000014485.5	Pdcd6	1:31576182_31591857	1539	2.97142e-07	-17.7754	4.80074e-05
ENSRNOG00000019458.7	Shpk	10:59787805_59789679	1874	3.07549e-07	-6.33557	4.95099e-05
ENSRNOG00000005513.7	Srsf5	6:104611013_104615303	2294	3.14546e-07	-17.3334	5.04848e-05
ENSRNOG00000012325.5	Adk	15:3033109_3094131	1391	3.14735e-07	-9.68085	5.04848e-05
ENSRNOG00000021153.6	Fkbp2	1:222232220_222235102	727	3.22275e-07	-2.37516	5.15092e-05
ENSRNOG00000010807.5	Cox6c	7:74723175_74731416	264	3.23016e-07	-110.377	5.15354e-05
ENSRNOG00000037850.4	43892	13:102724252_102731857	555	3.7056e-07	-2.55216	5.84941e-05
ENSRNOG00000002839.6	Slc19a2	13:82552549_82564232	4250	3.81804e-07	20.804	5.99598e-05
ENSRNOG00000060154.1	Ddx23	7:140325440_140326407	967	3.82374e-07	-27.8435	5.99598e-05
ENSRNOG00000053086.1	Selenop	2:53109575_53116422	2287	3.832e-07	3.38681	5.99598e-05
ENSRNOG00000002643.3	Ugdh	14:44495288_44504325	2878	3.85712e-07	-42.0049	6.01461e-05
ENSRNOG00000050183.4	RT1-CE1	20:4939614_4940259	257	3.90715e-07	-3.73319	6.08162e-05
ENSRNOG00000019915.5	Xrcc1	1:81435060_81441678	1492	3.94562e-07	-14.5939	6.12016e-05
ENSRNOG00000003958.7	Commd10	18:41153343_41154988	965	4.03126e-07	-7.06206	6.23023e-05
ENSRNOG00000037567.4	RGD1309730	3:91086130_91125911	740	4.0375e-07	-5.48534	6.23023e-05
ENSRNOG00000030726.6	Asgr2	10:56710474_56723611	1445	4.04883e-07	3.08272	6.23695e-05
ENSRNOG00000019710.6	Tm9sf1	15:34314644_34320585	1897	4.27467e-07	-8.24943	6.56273e-05
ENSRNOG00000004280.4	Tcn2	14:84173978_84174705	727	4.2812e-07	-24.6625	6.56273e-05
ENSRNOG00000020659.5	Mrpl4	8:22025546_22027236	979	4.30521e-07	-5.68197	6.57519e-05
ENSRNOG00000013002.7	Gpbp1	2:43002040_43003199	1159	4.43775e-07	-8.90709	6.76605e-05
ENSRNOG00000045738.2	Ak4	5:120304054_120309318	3924	4.55151e-07	-3.08149	6.91589e-05
ENSRNOG00000019264.4	Ltbr	4:157822837_157823875	1038	4.92502e-07	-12.5843	7.45806e-05
ENSRNOG00000028616.6	Pck1	3:171213914_171219887	2658	5.04939e-07	11.5514	7.62057e-05
ENSRNOG00000014508.7	Mgll	4:120762754_120773462	3004	5.13766e-07	-2.92226	7.71063e-05
ENSRNOG00000030126.5	Clk3	8:62527925_62529378	811	5.17133e-07	-44.7957	7.7263e-05
ENSRNOG00000047386.3	Smg1	1:187781574_187792527	5393	5.2345e-07	16.3965	7.7946e-05
ENSRNOG00000011519.6	Orc5	4:9223053_9223998	945	5.31129e-07	-8.95373	7.8958e-05
ENSRNOG00000002389.5	Morf4l2	X:107394466_107403051	3140	5.33547e-07	7.1978	7.91857e-05
ENSRNOG00000013004.7	Akr1d1	4:65110601_65116578	519	5.51162e-07	7.50164	8.16642e-05
ENSRNOG00000008988.4	Cyp2d2	7:123650574_123656345	4228	5.98352e-07	-3.22226	8.80721e-05
ENSRNOG00000008825.6	Ssrp1	3:72455678_72457649	1133	6.38089e-07	-8.87668	9.33062e-05
ENSRNOG00000014565.4	Lcmt1	1:193383841_193391638	539	6.47167e-07	-6.18652	9.43248e-05
ENSRNOG00000020298.6	Bag3	1:199941072_199965571	6461	6.4964e-07	88.9471	9.43774e-05
ENSRNOG00000009982.6	Pnp	15:27881802_27883564	1101	6.53786e-07	-2.22334	9.48255e-05
ENSRNOG00000007921.8	Hnrnpm	7:18516228_18522386	1365	6.64543e-07	-2.64216	9.62295e-05
ENSRNOG00000029844.5	Akr1c2	17:69388318_69404341	1580	6.88391e-07	-21.7562	9.92005e-05
ENSRNOG00000017188.5	Cyp27a1	9:81968296_81998258	2581	6.95717e-07	-47.6348	0.000100095
ENSRNOG00000024061.7	Rarb	15:10261196_10267995	2327	6.98996e-07	-7.02574	0.000100405
ENSRNOG00000004628.7	Dazap2	7:142238904_142245248	2995	7.00803e-07	-3.85239	0.000100503
ENSRNOG00000017775.6	Slc5a1	14:82908957_82975361	4070	7.1536e-07	17.2988	0.000102337
ENSRNOG00000000172.7	Sqor	3:114935384_114939377	702	7.16658e-07	-6.48985	0.000102337
ENSRNOG00000037627.4	Trappc1	10:55924946_55926783	800	7.26221e-07	-3.17161	0.000103484
ENSRNOG00000006622.6	Cry1	7:24623465_24634099	896	7.36065e-07	-24.4669	0.000104719
ENSRNOG00000011706.6	Mbl1	16:18736092_18742193	1253	7.39074e-07	-4.77919	0.00010498
ENSRNOG00000002935.6	Ankrd40	10:82045355_82046090	735	7.61434e-07	-10.7952	0.000107643
ENSRNOG00000037188.5	Mug1	4:154547017_154561830	2381	7.64591e-07	216.243	0.000107918
ENSRNOG00000029658.5	Rnf213	10:108622204_108626519	2262	7.77471e-07	-14.9917	0.000109563
ENSRNOG00000006947.7	Pdhx	3:92909187_92918874	1700	7.82988e-07	-7.14856	0.000110167
ENSRNOG00000001269.6	Ppp1cc	12:39864300_39865697	1397	8.22142e-07	-4.38983	0.000115494
ENSRNOG00000019895.6	Nedd8	15:34340601_34352673	775	8.27242e-07	-4.26396	0.000116028
ENSRNOG00000011785.7	Xrn2	3:141289771_141298272	738	8.52137e-07	-39.7735	0.000119333
ENSRNOG00000016924.8	Acly	10:88391632_88406903	2800	8.66171e-07	-10.4831	0.000120919
ENSRNOG00000016265.7	Acsl5	1:276278942_276290015	1395	8.87049e-07	-2.87939	0.000123256
ENSRNOG00000016961.4	Rps27	2:189572130_189573292	399	8.9682e-07	3.51836	0.00012442
ENSRNOG00000039528.3	Fam32a	16:19304519_19308887	2050	9.038e-07	-2.75939	0.000125194
ENSRNOG00000019090.6	Cct3	2:187692635_187693610	667	9.19257e-07	-16.3894	0.000126891
ENSRNOG00000047023.2	Aldh1l1	4:123515525_123520330	3236	9.53007e-07	-3.45203	0.000130955
ENSRNOG00000049303.2	Marco	16:85115148_85126190	933	9.75515e-07	-8.1374	0.000133472
ENSRNOG00000013195.6	Ruvbl1	4:120436730_120447458	734	9.85373e-07	-6.12175	0.000134222
ENSRNOG00000033245.5	Mug2	4:154267623_154276370	611	9.85505e-07	-4.88267	0.000134222
ENSRNOG00000033529.5	Amy1a	2:216428473_216431002	697	1.00618e-06	-3.6672	0.000136571
ENSRNOG00000018568.6	Rab5c	10:88621914_88645388	1909	1.04413e-06	13.1041	0.000140706
ENSRNOG00000015519.6	Ces1d	19:15148632_15151261	1015	1.06448e-06	-13.2096	0.000142587
ENSRNOG00000018653.5	Pfdn1	18:29233971_29290491	1159	1.09239e-06	-8.12963	0.000145888
ENSRNOG00000019630.7	Hacl1	16:7734891_7758452	4809	1.11913e-06	-23.6145	0.000149237
ENSRNOG00000020626.7	Snrnp25	10:15685997_15689328	780	1.14547e-06	-2.09666	0.000151661
ENSRNOG00000019369.6	Slx1b	1:198114520_198120080	2819	1.1458e-06	-9.8905	0.000151661
ENSRNOG00000015385.7	Pink1	5:156677264_156689415	2347	1.15268e-06	-2.573	0.00015219
ENSRNOG00000032134.4	Uqcrc1	8:117687529_117691143	1280	1.15676e-06	-4.5046	0.00015219
ENSRNOG00000061928.1	Myo1e	8:76839326_76840561	1235	1.15771e-06	-5.9913	0.00015219
ENSRNOG00000004725.6	Cela1	7:142305539_142308133	705	1.15791e-06	24.2712	0.00015219
ENSRNOG00000020704.5	Tkfc	1:226642711_226656410	3814	1.15831e-06	-3.48171	0.00015219
ENSRNOG00000021201.7	Txnip	2:198683097_198686975	2819	1.16717e-06	4.39518	0.000152905
ENSRNOG00000036852.3	Pcbp2	7:144092662_144102145	2174	1.17554e-06	9.81761	0.000153776
ENSRNOG00000018783.6	Bcas2	2:205662587_205670518	1103	1.20351e-06	15.5961	0.000156746
ENSRNOG00000008373.6	Colec11	6:47857765_47880379	1207	1.21308e-06	-3.75063	0.000157763
ENSRNOG00000045926.2	Lrrc45	10:109903376_109904041	665	1.25432e-06	-5.17953	0.0001626
ENSRNOG00000012873.8	Gfm1	2:164644817_164646570	666	1.27347e-06	-4.86544	0.000164657
ENSRNOG00000057470.1	Pla2g12a	2:235311652_235327952	1575	1.29875e-06	7.24004	0.000167683
ENSRNOG00000015591.5	Cndp2	18:81521958_81522746	788	1.30864e-06	-29.924	0.000168716
ENSRNOG00000018823.7	Nisch	16:7254367_7256188	1556	1.33478e-06	-10.1717	0.000171591
ENSRNOG00000004245.7	Mgst3	13:85604581_85622357	330	1.35466e-06	-2.49491	0.000173897
ENSRNOG00000012436.6	Adh6	2:243550531_243562542	6002	1.37283e-06	-2.74755	0.000175911
ENSRNOG00000010706.4	Ccdc117	14:85762301_85772897	3429	1.39858e-06	3.64449	0.000178593
ENSRNOG00000005360.8	Dhrs7b	10:47108647_47111232	735	1.39924e-06	-9.46252	0.000178593
ENSRNOG00000053898.1	AABR07013208.1	2:227718788_227720390	1193	1.41015e-06	-125.704	0.000179729
ENSRNOG00000009102.7	Fermt2	15:19807807_19811925	1997	1.41255e-06	-4.57459	0.000179778
ENSRNOG00000007496.7	Mtmr4	10:74904056_74909574	4192	1.47349e-06	-32.389	0.000187002
ENSRNOG00000016460.7	Clu	15:42653016_42665885	1803	1.51324e-06	3.75186	0.000191774
ENSRNOG00000008320.3	Lypla1	5:14559211_14564893	2064	1.53703e-06	-17.4674	0.000194513
ENSRNOG00000031092.6	Rock1	18:1285547_1318828	2093	1.58587e-06	-40.0915	0.000199844
ENSRNOG00000016596.3	Hspa4	10:38601623_38612289	3057	1.58864e-06	-4.77975	0.000199846
ENSRNOG00000050044.2	Ptp4a2	5:148050496_148061188	2591	1.61413e-06	3.81633	0.000202548
ENSRNOG00000052651.1	LOC102556085	3:114650545_114651848	289	1.75257e-06	6.23277	0.000218998
ENSRNOG00000006924.7	Tmem125	5:137370576_137373203	2399	1.77285e-06	-4.05778	0.000221223
ENSRNOG00000014575.5	Rtca	2:219537205_219547150	748	1.78935e-06	-11.6587	0.000222971
ENSRNOG00000037402.2	Cops9	9:99813321_99818283	517	1.81178e-06	-11.8309	0.00022545
ENSRNOG00000021166.7	Ecm1	2:197855466_197855970	504	1.84923e-06	-28.0081	0.000229791
ENSRNOG00000007029.3	Dnaja1	5:57029347_57039484	10041	1.85324e-06	30.9186	0.000229969
ENSRNOG00000006756.8	Maged1	X:63803188_63804072	675	1.85653e-06	-5.41518	0.000230058
ENSRNOG00000020578.8	Ceacam1	1:82327951_82344371	3549	1.94405e-06	11.579	0.000239905
ENSRNOG00000042086.3	Rab26	10:13893427_13893942	310	1.9845e-06	-6.69693	0.000243886
ENSRNOG00000012247.6	Rab7a	4:119910459_119959199	2119	1.99184e-06	-5.04788	0.000244452
ENSRNOG00000009333.7	Osgep	15:27842421_27843647	584	2.09285e-06	-39.7929	0.000256144
ENSRNOG00000057626.1	Kif1b	5:165964254_165982333	6352	2.10421e-06	-4.41216	0.000257183
ENSRNOG00000017689.7	Itih3	16:6991969_6993624	868	2.12198e-06	-2.51328	0.000258647
ENSRNOG00000020751.6	Rdm1	10:89550089_89550492	403	2.24231e-06	-39.3267	0.00027183
ENSRNOG00000060087.1	Adra1b	10:29392758_29394110	1352	2.31815e-06	-5.67653	0.000280643
ENSRNOG00000025592.5	Tspan31	7:70355642_70356306	389	2.32508e-06	-9.00519	0.000281101
ENSRNOG00000017420.7	Nudt6	2:124134303_124149646	1076	2.34104e-06	-13.0334	0.000282165
ENSRNOG00000047606.2	Bcl2a1	8:96551244_96559511	862	2.34335e-06	-36.1541	0.000282165
ENSRNOG00000019122.7	Sec16a	3:3856217_3857862	1645	2.49152e-06	-5.0218	0.000298798
ENSRNOG00000015139.7	F12	17:9736576_9744498	2366	2.49998e-06	-3.33506	0.000299411
ENSRNOG00000046171.3	AABR07035839.1	12:24590088_24595388	2768	2.58156e-06	40.3538	0.000307943
ENSRNOG00000017219.5	Vac14	19:40927006_40936227	994	2.6262e-06	-4.17087	0.00031285
ENSRNOG00000018964.2	Gss	3:151076251_151086332	1232	2.63531e-06	-3.12521	0.000313517
ENSRNOG00000003977.5	Dusp1	10:16970625_16973424	1942	2.68863e-06	19.0163	0.000318167
ENSRNOG00000061857.1	Mgst2	2:140708396_140727383	486	2.70296e-06	-2.24387	0.000319439
ENSRNOG00000015756.7	AABR07053687.1	3:120372211_120373572	947	2.71675e-06	-2.42831	0.000320001
ENSRNOG00000006545.8	Septin7	8:26475551_26476616	1065	2.71846e-06	-6.56539	0.000320001
ENSRNOG00000018568.6	Rab5c	10:88621923_88645388	1900	2.72209e-06	-10.275	0.000320006
ENSRNOG00000000604.5	Hdac2	20:43084869_43096680	1798	2.74288e-06	-8.32725	0.000322028
ENSRNOG00000015124.6	Gpam	1:275843816_275853886	3832	2.76732e-06	-3.02018	0.00032447
ENSRNOG00000021828.4	Coro1b	1:219401742_219403254	874	2.77157e-06	-18.9466	0.000324542
ENSRNOG00000025496.6	Usp7	10:7017775_7020748	2489	2.79757e-06	-44.4291	0.000327158
ENSRNOG00000000798.6	Gnl1	20:3290533_3291344	547	2.80688e-06	-49.105	0.000327818
ENSRNOG00000009439.6	Eef1a1	8:85840016_85841817	1620	2.92398e-06	4.99064	0.000339277
ENSRNOG00000048843.2	Tsfm	7:70311949_70313749	666	3.03342e-06	-4.30688	0.000351064
ENSRNOG00000042714.2	RGD1559459	14:22946179_22955671	2531	3.04227e-06	-9.36993	0.00035128
ENSRNOG00000017123.5	B2m	3:114087127_114093347	2024	3.04316e-06	4.03481	0.00035128
ENSRNOG00000029500.5	Tapbp	20:5467743_5476193	2061	3.05744e-06	3.70527	0.000351833
ENSRNOG00000029549.4	Eci3	17:30617167_30639941	2272	3.05976e-06	-2.61932	0.000351833
ENSRNOG00000002735.6	Dhx9	13:70885502_70888100	1319	3.15166e-06	-18.9327	0.000361006
ENSRNOG00000049819.1	Dnajc19	2:120504083_120509158	1501	3.24385e-06	-2.34492	0.000369585
ENSRNOG00000008672.7	Chmp5	5:57267292_57284459	1350	3.24398e-06	-2.73045	0.000369585
ENSRNOG00000032780.4	Mrpl58	10:103955684_103962529	1176	3.24766e-06	-11.0364	0.000369585
ENSRNOG00000000467.4	Ring1	20:3812285_3815848	1728	3.24818e-06	-46.8418	0.000369585
ENSRNOG00000012929.6	Wsb1	10:66586904_66603470	5083	3.25137e-06	21.1534	0.000369585
ENSRNOG00000018426.6	NEWGENE_2134	1:80604503_80609891	2478	3.26915e-06	-2.98183	0.000371133
ENSRNOG00000007213.5	Yars1	5:147375317_147403639	2533	3.33336e-06	-7.96091	0.000377943
ENSRNOG00000025448.6	Limd2	10:94350674_94351829	1067	3.48731e-06	-22.6061	0.000393899
ENSRNOG00000028730.5	Lcn12	3:2716458_2721882	5424	3.56143e-06	-5.13951	0.000401763
ENSRNOG00000007114.6	Psma6	6:76188029_76196728	367	3.6168e-06	-4.33792	0.000406981
ENSRNOG00000018322.8	Picalm	1:154455572_154460044	3072	3.65964e-06	-24.9489	0.000410488
ENSRNOG00000019574.6	Cuedc2	1:266078107_266086408	951	3.66174e-06	-6.39725	0.000410488
ENSRNOG00000013552.6	Scd	1:264155451_264172883	9306	3.85877e-06	-3.08838	0.000430414
ENSRNOG00000010390.7	Hmbs	8:48667274_48668502	852	3.99933e-06	-8.91195	0.000444077
ENSRNOG00000016795.6	Rabl6	3:2806776_2809725	1713	4.00114e-06	-4.68	0.000444077
ENSRNOG00000017801.7	Atf4	7:121480455_121482781	1677	4.02464e-06	4.9862	0.000446131
ENSRNOG00000019490.7	Slc20a2	16:74318229_74331121	2777	4.15594e-06	-2.86304	0.000459545
ENSRNOG00000005418.4	Trap1	10:11743564_11757736	1378	4.35321e-06	-2.21193	0.000478648
ENSRNOG00000028668.6	Slc28a2	3:114509257_114510294	389	4.36084e-06	7.88501	0.000478648
ENSRNOG00000000164.4	Lamp2	X:124730297_124766084	3547	4.4962e-06	2.81184	0.000491693
ENSRNOG00000024663.7	Fkbp15	5:78133343_78135984	838	4.59839e-06	-21.1399	0.000502254
ENSRNOG00000015866.5	Hint2	5:59150277_59152785	944	4.6457e-06	-4.72314	0.000506184
ENSRNOG00000036692.4	Gcgr	10:109711897_109716476	2553	4.69754e-06	-3.21289	0.000509965
ENSRNOG00000050932.2	Pfdn4	3:168129889_168132793	708	4.85362e-06	18.9717	0.000525632
ENSRNOG00000009960.8	Puf60	7:117129242_117129721	479	4.93417e-06	-10.0407	0.000533709
ENSRNOG00000003747.6	Get3	19:26133026_26134298	741	4.95122e-06	-20.1161	0.000534905
ENSRNOG00000028668.6	Slc28a2	3:114509257_114510294	386	4.99371e-06	10.1142	0.000538844
ENSRNOG00000007665.4	Cse1l	3:163699920_163702074	977	5.09492e-06	-4.7319	0.00054778
ENSRNOG00000025053.5	Lrp1	7:70845792_70868523	7681	5.23329e-06	62.4632	0.000559962
ENSRNOG00000009888.5	Timm8b	8:55038770_55039130	360	5.3026e-06	-76.7233	0.000566023
ENSRNOG00000031173.6	Snd1	4:56157192_56171740	1716	5.34623e-06	-5.62193	0.000569319
ENSRNOG00000010240.6	Tent5a	8:92935338_92941731	5366	5.36932e-06	5.08785	0.000570649
ENSRNOG00000049303.2	Marco	16:85115148_85120611	800	5.37149e-06	-9.02965	0.000570649
ENSRNOG00000042692.3	AABR07027750.1	17:43492532_43498343	3678	5.44412e-06	15.3609	0.000577557
ENSRNOG00000011474.5	Ppp1r3b	16:60414765_60427474	4796	5.5434e-06	-4.82226	0.000586623
ENSRNOG00000034015.3	Capn2	13:100878644_100879730	1086	5.58454e-06	-5.20651	0.000589776
ENSRNOG00000016348.4	Tat	19:41673675_41686243	6186	5.63278e-06	6.58641	0.000593468
ENSRNOG00000021177.5	Cox8a	1:222466574_222469002	601	5.71515e-06	-3.50208	0.0006005
ENSRNOG00000027773.6	Ppp4r3a	6:125040664_125044208	2092	5.71969e-06	-9.89284	0.0006005
ENSRNOG00000009015.7	Nfx1	5:57309776_57334504	3704	5.76471e-06	-19.1412	0.000603808
ENSRNOG00000050585.2	Pgam1	1:261164475_261165814	1339	5.77818e-06	-7.92279	0.00060451
ENSRNOG00000008604.7	Nsfl1c	3:146980887_147005858	1873	5.84724e-06	-3.30124	0.000609594
ENSRNOG00000029333.4	Echdc2	5:127776166_127789580	1065	5.85517e-06	-6.74041	0.000609709
ENSRNOG00000014429.5	Arfgap2	3:80090051_80094263	2475	5.93777e-06	-10.6534	0.000616872
ENSRNOG00000039079.4	Ces2h	19:37052555_37067185	2029	5.95789e-06	6.83914	0.000617982
ENSRNOG00000012843.4	Aspg	6:136682125_136701674	2793	6.03899e-06	-3.66137	0.000625207
ENSRNOG00000008798.7	Pipox	10:64950847_64953962	496	6.09063e-06	-2.2152	0.000629824
ENSRNOG00000006305.5	Slc38a2	7:138088648_138093880	3371	6.13442e-06	3.46198	0.000632886
ENSRNOG00000046763.3	Adssl1	6:137206252_137206714	462	6.17057e-06	-23.7389	0.000635882
ENSRNOG00000012106.4	Dnaja4	8:59293503_59295511	1908	6.20821e-06	5.90313	0.000638288
ENSRNOG00000020194.7	Hes6	9:98549685_98551608	1529	6.42002e-06	-9.60271	0.000659306
ENSRNOG00000057855.1	F5	13:82505211_82521001	3763	6.49118e-06	6.28878	0.000665086
ENSRNOG00000019555.7	Arap1	1:166513439_166526455	3127	6.58766e-06	-16.6058	0.000672988
ENSRNOG00000002144.6	Exoc1	14:34132113_34134823	1151	6.58775e-06	-19.905	0.000672988
ENSRNOG00000000397.6	Ccar1	20:32374626_32383870	1322	6.5909e-06	-9.17101	0.000672988
ENSRNOG00000058249.1	Pgk1	X:77275365_77280183	1824	6.63493e-06	-3.64517	0.000675345
ENSRNOG00000059466.1	AC126572.6	12:13210859_13212254	352	6.63666e-06	-7.70492	0.000675345
ENSRNOG00000018289.6	Park7	5:167988384_168000111	900	6.67602e-06	-12.8012	0.000677805
ENSRNOG00000048834.2	Plin3	9:10773883_10782199	2225	7.04042e-06	-4.2079	0.000710764
ENSRNOG00000046727.2	Abcc2	1:263554427_263558481	613	7.16201e-06	-2.57743	0.000720596
ENSRNOG00000020246.7	Myl9	3:152857563_152863961	1133	7.25669e-06	-13.4554	0.000729302
ENSRNOG00000003542.7	Hcfc1r1	10:12995393_12995674	281	7.48815e-06	-23.7811	0.000751717
ENSRNOG00000033318.4	Rfxank	16:21034939_21037081	739	7.55487e-06	-20.7573	0.000757565
ENSRNOG00000031173.6	Snd1	4:56162890_56171702	1449	7.60248e-06	-3.29724	0.00076125
ENSRNOG00000015866.5	Hint2	5:59150286_59152785	932	7.60866e-06	-8.88758	0.00076125
ENSRNOG00000013179.5	Tinagl1	5:148382705_148383544	752	7.69278e-06	-9.69586	0.000767946
ENSRNOG00000020952.8	Cgn	2:195909625_195913186	2117	8.05769e-06	-5.77806	0.00079851
ENSRNOG00000021615.7	Mettl26	10:15242709_15243061	281	8.06639e-06	-3.93783	0.00079851
ENSRNOG00000053498.1	Dnajc22	7:140786136_140787009	873	8.24398e-06	-5.55727	0.000814777
ENSRNOG00000006331.4	Elovl5	8:85220978_85287451	2699	8.51227e-06	3.52643	0.000837587
ENSRNOG00000005796.7	Ctnna1	18:28053857_28055969	1452	8.54758e-06	-5.05167	0.000840136
ENSRNOG00000001030.8	Tsc22d1	15:58655620_58658247	1464	8.59063e-06	-7.88418	0.000843439
ENSRNOG00000060728.1	Tuba1a	7:140637284_140638369	1085	8.61872e-06	-2.61147	0.000845269
ENSRNOG00000017123.5	B2m	3:114087175_114093317	1946	8.746e-06	-3.79419	0.000855872
ENSRNOG00000011300.8	AABR07031193.1	18:3930967_3941381	1445	8.84341e-06	-6.96543	0.000864457
ENSRNOG00000024629.6	Hadha	6:27626884_27629691	1696	9.05475e-06	-27.3914	0.000881535
ENSRNOG00000003649.9	Qsox1	13:73423390_73426567	1188	9.05758e-06	-4.4388	0.000881535
ENSRNOG00000005615.6	Gadd45a	4:97782508_97784842	1244	9.08367e-06	-3.74596	0.000882577
ENSRNOG00000003048.6	Tiprl	13:83478968_83504526	1775	9.16783e-06	-33.3907	0.000888394
ENSRNOG00000005542.8	Apob	6:33205152_33218776	12132	9.46079e-06	2.08602	0.000914576
ENSRNOG00000015844.4	Snrpd2	1:80059658_80059996	338	9.52797e-06	-64.6042	0.000918314
ENSRNOG00000026965.6	Tmem140	4:62380473_62391912	1811	9.56087e-06	3.59371	0.000920491
ENSRNOG00000020288.4	Slc25a20	8:117455261_117476764	1802	9.57154e-06	52.7514	0.000920527
ENSRNOG00000037815.5	Acad10	12:40454984_40460877	1180	9.60541e-06	-12.6244	0.000922393
ENSRNOG00000025443.4	Map1lc3a	3:150801768_150802937	800	9.64014e-06	-6.45494	0.00092414
ENSRNOG00000005825.8	Lyz2	7:60335966_60336795	829	9.6859e-06	-7.60549	0.000927532
ENSRNOG00000010673.7	Eral1	10:65288524_65291065	1512	9.7965e-06	-9.59483	0.000936116
ENSRNOG00000007029.3	Dnaja1	5:57032593_57043002	4803	9.91444e-06	3.06944	0.000945364
ENSRNOG00000001842.7	Mrps35	4:181463643_181464394	751	1.01306e-05	-21.0198	0.000963921
ENSRNOG00000014288.8	Fn1	9:78907653_78934571	3945	1.01458e-05	4.45475	0.000964338
ENSRNOG00000019451.6	Smtn	14:83755139_83759114	623	1.04351e-05	-6.80108	0.000989727
ENSRNOG00000046171.3	AABR07035839.1	12:24590088_24595388	2771	1.04626e-05	34.8156	0.000991283
ENSRNOG00000002212.6	Hsd17b13	14:7113343_7129706	2985	1.05083e-05	-5.3447	0.000994559
ENSRNOG00000014434.7	Chd1	1:57751444_57757756	2980	1.05499e-05	7.69404	0.000997437
ENSRNOG00000011614.8	Tmcc1	4:147920833_147975662	2407	1.05812e-05	9.75714	0.000999337
ENSRNOG00000008245.7	AABR07054614.1	3:163950054_163954772	1315	1.0652e-05	-35.7883	0.00100391
ENSRNOG00000020345.6	Slc25a42	16:20962174_20985299	2931	1.06854e-05	-31.5094	0.00100499
ENSRNOG00000004959.7	Actr2	14:104338479_104375655	3630	1.08402e-05	11.3199	0.00101659
ENSRNOG00000019924.6	Thop1	7:11501020_11502492	1058	1.08435e-05	-8.14153	0.00101659
ENSRNOG00000008065.7	Wwc1	10:20662994_20663950	956	1.08661e-05	-13.3862	0.00101764
ENSRNOG00000049931.2	LOC288913	19:25355814_25358671	737	1.10007e-05	-5.85866	0.00102917
ENSRNOG00000004040.8	Abca8	10:98236904_98259174	2066	1.10122e-05	20.7639	0.00102917
ENSRNOG00000003709.6	Kmo	13:93712248_93716020	2258	1.13917e-05	-5.50531	0.0010602
ENSRNOG00000007356.4	Chmp3	4:99474534_99496152	2353	1.1425e-05	-10.5296	0.00106219
ENSRNOG00000021871.6	Gcn1	12:46728567_46731314	1163	1.16806e-05	-3.72852	0.00108163
ENSRNOG00000013293.5	Mccc1	2:122550774_122551855	429	1.19859e-05	-7.92143	0.00110514
ENSRNOG00000000799.7	Abcf1	20:3321253_3322829	1163	1.20706e-05	-3.50235	0.0011118
ENSRNOG00000000796.8	Ranbp2	20:28073958_28077349	2753	1.21219e-05	-3.82783	0.00111538
ENSRNOG00000053306.1	Washc1	9:113933994_113936870	1168	1.22854e-05	-15.7642	0.00112862
ENSRNOG00000016587.4	Ninj1	17:15866213_15881380	1236	1.22911e-05	-2.45518	0.00112862
ENSRNOG00000008411.6	Sec23b	3:138753581_138757117	560	1.23577e-05	-63.983	0.00113164
ENSRNOG00000000923.8	Cct6a	12:30491413_30493259	802	1.26472e-05	-25.5441	0.0011542
ENSRNOG00000045752.2	Rrm1	1:167562010_167562689	679	1.27295e-05	-14.9739	0.00116052
ENSRNOG00000000185.5	Mpst	7:119630595_119631426	831	1.28503e-05	-22.6598	0.00116797
ENSRNOG00000012574.6	Pum3	1:245476385_245476661	276	1.30701e-05	-3.17779	0.00118313
ENSRNOG00000021615.7	Mettl26	10:15241457_15242333	556	1.30843e-05	-6.8512	0.00118322
ENSRNOG00000016751.5	Slc25a28	1:263419981_263421099	1118	1.31336e-05	-5.46792	0.00118648
ENSRNOG00000026319.6	Akap9	4:27195345_27203161	911	1.32404e-05	-7.65767	0.00119492
ENSRNOG00000014478.7	Fndc3a	15:54378852_54448455	5734	1.33021e-05	10.2168	0.00119927
ENSRNOG00000016275.4	Ttr	18:15532543_15540177	1120	1.34038e-05	2.53121	0.00120674
ENSRNOG00000018042.7	Mrpl48	1:165563787_165606396	1309	1.34119e-05	-5.75926	0.00120674
ENSRNOG00000000068.5	Ppp2r5a	13:110032751_110034640	1889	1.36247e-05	-6.71846	0.00122465
ENSRNOG00000004301.6	Dcaf13	7:78015346_78040234	1073	1.39859e-05	-9.3868	0.00125333
ENSRNOG00000015857.6	Ctsa	3:161303666_161304880	893	1.40983e-05	-11.6848	0.00126214
ENSRNOG00000019587.6	Ptprn	9:82446622_82447548	692	1.43112e-05	-20.8658	0.00127844
ENSRNOG00000025764.5	AC128848.1	19:11301976_11303097	659	1.43234e-05	-3.28492	0.00127844
ENSRNOG00000026497.4	Pigc	13:79886843_79889315	1471	1.44318e-05	20.2755	0.00128555
ENSRNOG00000057092.1	Slfn4	10:70411706_70417298	634	1.45442e-05	-34.8127	0.00129206
ENSRNOG00000017952.4	Septin2	9:100655913_100658053	2140	1.45482e-05	-4.39336	0.00129206
ENSRNOG00000019047.6	Ola1	3:59802005_59808775	890	1.46888e-05	-5.14026	0.00130131
ENSRNOG00000002478.5	Insig2	13:37264792_37287473	2525	1.46961e-05	-8.2573	0.00130131
ENSRNOG00000023546.5	Hspb1	12:23839255_23841272	1245	1.48957e-05	20.1336	0.00131507
ENSRNOG00000038258.4	Upb1	20:14167255_14176456	891	1.49709e-05	-2.31892	0.00132041
ENSRNOG00000020793.6	Ruvbl2	1:101413747_101417212	1032	1.50031e-05	-8.17382	0.00132161
ENSRNOG00000007395.6	Baat	5:64763075_64777935	7595	1.50141e-05	-5.54049	0.00132161
ENSRNOG00000011905.6	Atp6v1e1	4:153351420_153359782	897	1.50974e-05	-18.2377	0.00132763
ENSRNOG00000018076.5	Fmo5	2:199797108_199823927	2012	1.52345e-05	2.82278	0.00133619
ENSRNOG00000020475.3	Sart1	1:220762348_220763965	744	1.53105e-05	-18.801	0.0013411
ENSRNOG00000020385.3	Fads3	1:226105975_226114522	6647	1.57159e-05	-2.49807	0.00137257
ENSRNOG00000008414.8	Bsg	7:12875533_12882786	1351	1.58724e-05	-2.28318	0.00138488
ENSRNOG00000015018.7	Pdia3	3:113376904_113400707	1959	1.59098e-05	3.36388	0.00138679
ENSRNOG00000036678.4	Aspscr1	10:109884188_109889353	468	1.60121e-05	-2.28761	0.00139163
ENSRNOG00000007069.6	Adhfe1	5:9403193_9429867	1980	1.60312e-05	7.91733	0.00139194
ENSRNOG00000018730.7	Nectin2	1:80639653_80647092	1304	1.62522e-05	-7.83429	0.00140976
ENSRNOG00000002039.6	Evi5	14:2939897_2944381	1400	1.64784e-05	13.0778	0.00142523
ENSRNOG00000020636.7	Spint2	1:87199312_87201128	596	1.65429e-05	-52.1705	0.00142942
ENSRNOG00000014625.4	Atp5f1d	7:12426795_12428813	742	1.66345e-05	-76.8394	0.00143492
ENSRNOG00000038436.4	RGD1307100	2:123762118_123767070	1409	1.66387e-05	-33.2792	0.00143492
ENSRNOG00000029223.6	Prss32	10:13197535_13200636	591	1.6678e-05	-32.0629	0.00143693
ENSRNOG00000007699.5	Golga5	6:126370177_126378734	1132	1.67788e-05	-10.5415	0.00144422
ENSRNOG00000013331.5	Sdha	1:31562499_31571207	1986	1.71291e-05	-2.08061	0.00147296
ENSRNOG00000013552.6	Scd	1:264155451_264172879	9302	1.73887e-05	-3.5282	0.00149384
ENSRNOG00000050348.2	LOC684270	1:72490406_72509431	2296	1.75522e-05	-7.73612	0.00150644
ENSRNOG00000043114.1	Tomm7	4:7835333_7842792	994	1.81353e-05	-6.94969	0.00155201
ENSRNOG00000012084.5	Xpnpep1	1:273708106_273712669	789	1.82144e-05	-48.9615	0.00155729
ENSRNOG00000010989.8	Ipo5	15:106283838_106293435	2891	1.87969e-05	-3.7037	0.00160235
ENSRNOG00000013360.6	Prkcsh	8:23015558_23026527	1833	1.89422e-05	-25.0913	0.0016118
ENSRNOG00000017473.6	Ttc25	10:88468635_88488311	1318	1.91341e-05	-8.38786	0.00162658
ENSRNOG00000004060.7	Calm1	6:124217045_124219949	343	1.9439e-05	-2.30802	0.00164936
ENSRNOG00000032917.3	Zfand2a	12:17254951_17265388	10437	1.95095e-05	93.1137	0.00165377
ENSRNOG00000014314.8	Slc39a4	7:117675716_117676355	548	1.95463e-05	-6.39068	0.00165532
ENSRNOG00000028650.7	Inf2	6:137171625_137180626	2567	1.96307e-05	-5.35128	0.00166038
ENSRNOG00000054017.1	LOC100912564	17:44522119_44522475	356	1.9835e-05	-34.6766	0.00167501
ENSRNOG00000045743.2	Etnppl	2:235757261_235760622	3361	1.98863e-05	-10.6198	0.00167775
ENSRNOG00000016957.5	Igfbp2	9:80117639_80144804	958	1.99561e-05	-4.24566	0.00168047
ENSRNOG00000000808.6	Hsf2	20:38965714_38985104	3084	2.00313e-05	3.37023	0.00168521
ENSRNOG00000013391.8	Sorbs2	16:49626099_49660607	3138	2.00504e-05	3.66758	0.00168523
ENSRNOG00000047185.2	Eif3i	5:147796478_147796948	358	2.03864e-05	-9.85286	0.00171186
ENSRNOG00000018568.6	Rab5c	10:88621914_88623168	1254	2.08971e-05	-14.2583	0.00174982
ENSRNOG00000046699.3	Slpi	3:160799977_160800921	395	2.10653e-05	-36.2548	0.00176059
ENSRNOG00000011910.7	Hnrnpr	5:154699675_154700050	375	2.1286e-05	-31.7935	0.00177738
ENSRNOG00000017866.5	Sirt5	17:23999049_24013969	1309	2.14764e-05	-7.37344	0.00179161
ENSRNOG00000004537.6	Rxrg	13:85858262_85868554	963	2.17446e-05	6.13589	0.0018106
ENSRNOG00000007964.4	Tp53inp1	5:24402911_24422504	6742	2.27224e-05	6.76598	0.00188499
ENSRNOG00000016955.5	Mindy3	17:79720529_79761183	1349	2.36472e-05	-12.2336	0.00195445
ENSRNOG00000010776.7	Atp13a1	16:21364083_21366721	1405	2.36812e-05	-6.97616	0.00195545
ENSRNOG00000003497.4	Thoc6	10:12994396_12995674	671	2.391e-05	10.1217	0.00197252
ENSRNOG00000004515.4	Pes1	14:84227536_84227979	443	2.46357e-05	-44.2845	0.0020249
ENSRNOG00000016234.5	Ciapin1	19:10608853_10610049	808	2.46809e-05	-6.33982	0.0020249
ENSRNOG00000000893.6	Tmem248	12:29931730_29937638	2862	2.50063e-05	-7.77446	0.00204971
ENSRNOG00000057601.1	AABR07044080.2	19:56443631_56443869	238	2.55581e-05	-5.40708	0.00208919
ENSRNOG00000047503.2	Apoc3	8:50529190_50531423	856	2.60973e-05	-10.3873	0.00212162
ENSRNOG00000031004.4	Cyp2j4	5:119546346_119550304	1146	2.61347e-05	-9.34627	0.00212273
ENSRNOG00000058580.1	Paip1	2:52316659_52328206	1947	2.62425e-05	-6.90773	0.00212605
ENSRNOG00000027646.4	Pop4	1:94661120_94662796	658	2.66307e-05	-18.9526	0.00215518
ENSRNOG00000016348.4	Tat	19:41673675_41686243	6002	2.74342e-05	3.9907	0.00221219
ENSRNOG00000060008.1	Cog7	1:191889321_191890000	679	2.77987e-05	-25.8454	0.00223147
ENSRNOG00000012106.4	Dnaja4	8:59278813_59294191	6434	2.78113e-05	44.6416	0.00223147
ENSRNOG00000021438.3	Tuba1c	7:140723518_140724449	931	2.78231e-05	-9.09808	0.00223147
ENSRNOG00000003020.6	Slc25a47	6:132764739_132768747	2255	2.79182e-05	-13.6197	0.00223708
ENSRNOG00000003714.6	Clk4	10:36716812_36733474	1910	2.79767e-05	3.00182	0.00223977
ENSRNOG00000002636.7	Abat	10:7090748_7127571	4978	2.80262e-05	-4.94107	0.00224172
ENSRNOG00000002662.5	Pbdc1	X:76044317_76047160	1099	2.81296e-05	-4.20727	0.00224798
ENSRNOG00000005988.4	Arl8a	13:51980824_51981978	1154	2.84636e-05	-7.09456	0.0022713
ENSRNOG00000007241.6	Fnbp4	3:79608661_79610637	1753	2.84722e-05	-18.9191	0.0022713
ENSRNOG00000019638.7	Lmna	2:187842811_187849880	2680	2.8534e-05	-29.1554	0.00227217
ENSRNOG00000013516.6	Sf3b1	9:61593395_61634510	6178	2.89873e-05	-28.5524	0.00230415
ENSRNOG00000036688.2	Arhgdia	10:109753977_109757539	1895	2.9079e-05	31.8866	0.00230734
ENSRNOG00000015630.5	Cct7	4:117250770_117252292	805	2.93444e-05	-9.85388	0.00232427
ENSRNOG00000056946.1	Scaf1	1:100997721_100998653	813	2.96541e-05	-6.4342	0.00234464
ENSRNOG00000034230.6	Fcrl1	2:186685045_186691059	415	3.08313e-05	24.9899	0.00242698
ENSRNOG00000011282.6	Ppp2r1a	1:60730890_60737507	2037	3.08811e-05	-10.993	0.00242876
ENSRNOG00000020444.3	Hcn3	2:188460452_188463214	1596	3.11649e-05	-4.28393	0.00244877
ENSRNOG00000011141.8	Serpina11	6:127647144_127656614	1515	3.13451e-05	-2.52008	0.0024566
ENSRNOG00000012954.7	Eefsec	4:120194334_120219451	1233	3.17744e-05	-11.5756	0.00248807
ENSRNOG00000026775.6	Pmpca	3:3840534_3844227	2671	3.18937e-05	-28.5248	0.00249522
ENSRNOG00000014064.5	Ctsh	8:97454718_97459543	1915	3.19724e-05	-3.65592	0.00249919
ENSRNOG00000023130.6	Lyplal1	13:104049281_104051037	1107	3.2047e-05	-7.65449	0.00250283
ENSRNOG00000048878.1	Smim24	7:11183374_11186275	697	3.26754e-05	-14.0821	0.00254523
ENSRNOG00000019618.7	Hdac3	18:31072957_31078075	1166	3.28957e-05	-4.53885	0.00255794
ENSRNOG00000055319.1	Mrfap1	14:78974142_78975174	1032	3.2954e-05	-3.79475	0.00256024
ENSRNOG00000002039.6	Evi5	14:2898008_2916937	580	3.30172e-05	29.7346	0.0025607
ENSRNOG00000009849.7	Eef1akmt1	15:37813083_37820533	688	3.34606e-05	-6.4132	0.00259059
ENSRNOG00000057676.1	Polr2m	8:77984726_77986491	1765	3.37195e-05	-30.394	0.00260611
ENSRNOG00000053814.1	AC105531.1	10:71355790_71358453	1027	3.4102e-05	-3.50559	0.00263205
ENSRNOG00000008553.7	Mthfr	5:164844384_164864377	6274	3.41988e-05	7.11307	0.00263444
ENSRNOG00000004793.6	Ncln	7:11084370_11091602	2688	3.4204e-05	-8.8061	0.00263444
ENSRNOG00000016653.4	Ngef	9:94569284_94570289	1005	3.43371e-05	-6.43085	0.00264057
ENSRNOG00000051860.1	Rnase4	15:28032607_28035502	1652	3.43426e-05	-2.78004	0.00264057
ENSRNOG00000013498.4	Pex14	5:165782892_165808499	1720	3.47662e-05	-6.73711	0.00267084
ENSRNOG00000012929.6	Wsb1	10:66586906_66603151	3556	3.57561e-05	4.35632	0.00273771
ENSRNOG00000018899.8	C5	3:14049987_14112852	4413	3.57592e-05	3.64272	0.00273771
ENSRNOG00000017254.6	Nsun2	1:36295649_36300325	2897	3.58865e-05	-9.91993	0.00274276
ENSRNOG00000014204.7	Pacsin3	3:80072413_80081080	1852	3.60022e-05	-3.83322	0.0027469
ENSRNOG00000006508.6	Thnsl2	4:98976549_98981546	919	3.65905e-05	-3.75792	0.00278465
ENSRNOG00000007766.6	Pqbp1	X:15451864_15453130	821	3.67009e-05	-16.0217	0.00279068
ENSRNOG00000019423.5	Dvl1	5:173304626_173308020	2026	3.68506e-05	-2.67982	0.00279907
ENSRNOG00000014525.5	Hspd1	9:61680331_61691105	9185	3.71811e-05	54.627	0.0028176
ENSRNOG00000015441.7	Il4r	1:196956173_196967221	3257	3.76302e-05	-2.88957	0.0028432
ENSRNOG00000020578.8	Ceacam1	1:82327951_82344371	3602	3.76535e-05	9.88112	0.0028432
ENSRNOG00000025764.5	AC128848.1	19:11301976_11303176	1200	3.76781e-05	-3.9292	0.0028432
ENSRNOG00000002618.7	Ivns1abp	13:68702772_68721653	2810	3.7879e-05	9.64085	0.00285595
ENSRNOG00000009832.6	Slc39a14	15:51980462_52029818	12006	3.83873e-05	11.1119	0.00288638
ENSRNOG00000008782.6	Pnisr	5:36011121_36018169	3453	3.85421e-05	-10.2349	0.0028913
ENSRNOG00000048848.2	Ccdc9	1:78214360_78219640	1356	3.97459e-05	-6.6675	0.00297412
ENSRNOG00000008643.6	Rars2	5:50109634_50117035	800	4.00873e-05	-5.69976	0.00299151
ENSRNOG00000003620.5	Fmo3	13:80837789_80856144	2686	4.01123e-05	6.72248	0.00299151
ENSRNOG00000055721.1	Rnf128	X:110818636_110878280	3033	4.10218e-05	6.13216	0.00304663
ENSRNOG00000005195.6	Cst3	3:143219505_143223751	1101	4.14255e-05	5.68192	0.00306896
ENSRNOG00000059015.1	Triobp	7:120260172_120262636	2464	4.17486e-05	-4.27827	0.00309033
ENSRNOG00000017672.7	Akr1c14	17:69805639_69811095	2143	4.18009e-05	-31.1843	0.00309164
ENSRNOG00000027552.4	Tapbpl	4:157735125_157743199	2508	4.19576e-05	-25.2642	0.00310066
ENSRNOG00000013110.6	Nudt2	5:57845813_57860658	910	4.22569e-05	-35.794	0.0031202
ENSRNOG00000023383.6	Ddx3x	X:10400356_10414130	4778	4.24284e-05	14.7788	0.00313028
ENSRNOG00000032669.5	Serpina1	6:127607473_127620450	4303	4.31158e-05	-2.39587	0.00317313
ENSRNOG00000001964.7	Cd47	11:53511484_53530008	4278	4.52383e-05	-17.7876	0.00331568
ENSRNOG00000006733.7	Srgap2	13:48073896_48079264	769	4.58703e-05	-18.4628	0.00335649
ENSRNOG00000007088.6	Xpot	7:63688622_63701461	3072	4.65331e-05	-8.56806	0.00339113
ENSRNOG00000055572.1	Idh3g	X:157007358_157008736	645	4.65334e-05	-8.67796	0.00339113
ENSRNOG00000028668.6	Slc28a2	3:114370955_114372186	1231	4.68617e-05	9.28133	0.00341227
ENSRNOG00000004474.5	Klhdc2	6:91605103_91612413	2429	4.79245e-05	21.7372	0.00348398
ENSRNOG00000019529.5	Btbd1	1:143609691_143612105	1896	4.79874e-05	-6.66027	0.00348572
ENSRNOG00000015969.7	Rpf1	2:252368328_252370074	676	4.8387e-05	-10.4895	0.00350713
ENSRNOG00000017506.7	Cltb	17:10549424_10555966	1646	4.84e-05	-32.1038	0.00350713
ENSRNOG00000008377.7	Wdtc1	5:151487570_151536715	4345	4.84533e-05	23.7258	0.00350815
ENSRNOG00000043171.4	Hdhd2	18:73226529_73237189	1472	4.97548e-05	-2.20055	0.00359365
ENSRNOG00000026115.6	Zfp646	1:199331246_199333015	1169	5.09325e-05	-29.2517	0.00367573
ENSRNOG00000049142.2	Hdgfl2	9:10972336_10976766	1693	5.09868e-05	-6.59358	0.00367669
ENSRNOG00000054423.1	Pemt	10:46399230_46404823	363	5.10404e-05	-2.38643	0.00367758
ENSRNOG00000050183.4	RT1-CE1	20:4939614_4940246	292	5.11209e-05	-3.55376	0.00368042
ENSRNOG00000006997.8	App	11:24424916_24435458	1361	5.14403e-05	-9.68386	0.00370043
ENSRNOG00000061876.1	Tas1r2	5:158114094_158115734	1640	5.16145e-05	-2.29516	0.00370997
ENSRNOG00000002385.7	Prg4	13:67672425_67674520	1067	5.17522e-05	-5.06992	0.00371579
ENSRNOG00000013133.3	Foxa2	3:142382963_142387531	2588	5.18201e-05	-20.0905	0.00371579
ENSRNOG00000005276.6	Csnk2a1	3:147757373_147760386	3013	5.19731e-05	-3.34612	0.00372272
ENSRNOG00000006467.4	Eif2b2	6:109049245_109051264	655	5.20002e-05	-18.084	0.00372272
ENSRNOG00000020086.6	Aar2	3:152626798_152649609	3605	5.2478e-05	-14.469	0.00375177
ENSRNOG00000014525.5	Hspd1	9:61680524_61681129	605	5.28923e-05	-11.1926	0.00376844
ENSRNOG00000002940.7	Ankrd17	14:19396633_19406808	1132	5.42464e-05	-26.3486	0.00384349
ENSRNOG00000027024.5	Rgs16	13:71181215_71185216	2175	5.43058e-05	-6.51053	0.00384466
ENSRNOG00000014526.6	Cars2	16:83309950_83325713	1051	5.44973e-05	-6.89929	0.00385515
ENSRNOG00000019749.7	Ube2j2	5:173384518_173387200	1060	5.47271e-05	-13.2144	0.00386835
ENSRNOG00000018801.7	AC109048.1	19:54619110_54621490	1121	5.59118e-05	-5.28829	0.00394585
ENSRNOG00000043503.2	Ehd1	1:221664574_221667337	2363	5.63498e-05	-6.42566	0.00397362
ENSRNOG00000015077.7	Acsf3	19:55621514_55635322	915	5.68619e-05	-3.08087	0.00400025
ENSRNOG00000020412.7	Sf3b2	1:220645671_220647109	1134	5.69854e-05	-9.87614	0.00400579
ENSRNOG00000014872.7	Sec24d	2:227546158_227563093	1734	5.76198e-05	-11.1993	0.00403713
ENSRNOG00000005190.5	Nipal2	7:73339712_73340463	751	5.77192e-05	-5.34995	0.00403831
ENSRNOG00000006460.5	Amdhd2	10:13528377_13529362	451	5.81237e-05	-14.3897	0.00406025
ENSRNOG00000014525.5	Hspd1	9:61680331_61683967	3070	5.84902e-05	78.4225	0.00408266
ENSRNOG00000057042.1	Pcca	15:109293508_109306867	682	5.91143e-05	-2.0281	0.004123
ENSRNOG00000020775.8	Cyp2b2	1:83111845_83119578	1408	5.93348e-05	-3.39868	0.00413515
ENSRNOG00000003147.8	Sqstm1	10:35704080_35709337	5055	5.9569e-05	12.2037	0.00414501
ENSRNOG00000011970.5	Tmem82	5:160169465_160174698	2766	6.0573e-05	-10.0283	0.00420178
ENSRNOG00000010479.8	Mycbp2	15:93677833_93679008	1175	6.07048e-05	-25.3698	0.00420634
ENSRNOG00000010218.7	Eif5	6:136003185_136004512	1327	6.12328e-05	9.3784	0.00423112
ENSRNOG00000019522.7	Ciao3	10:15151851_15153008	1157	6.19032e-05	-8.96873	0.00427239
ENSRNOG00000048848.2	Ccdc9	1:78213222_78219640	1306	6.2719e-05	-7.41578	0.00431712
ENSRNOG00000020060.4	Atf5	1:100808240_100811969	1367	6.2887e-05	4.63194	0.00432536
ENSRNOG00000010048.6	Dctn1	4:114891739_114896573	1451	6.35901e-05	-3.51329	0.00437035
ENSRNOG00000054689.1	Cox7b	X:77065375_77071676	499	6.38781e-05	-2.04012	0.0043834
ENSRNOG00000030568.6	Rgs12	14:80982004_80985670	1873	6.39383e-05	-7.1483	0.00438417
ENSRNOG00000012749.6	C1qb	5:155246310_155252020	1236	6.51139e-05	-2.94943	0.00444401
ENSRNOG00000018920.5	Slc25a17	7:122539292_122544184	1055	6.53827e-05	-11.0707	0.00445407
ENSRNOG00000022392.3	Hspb8	12:45916858_45923044	6186	6.54064e-05	43.9517	0.00445407
ENSRNOG00000029194.5	Dhx30	8:118160298_118162324	1399	6.64092e-05	-3.70863	0.00451204
ENSRNOG00000019113.7	Hnrnpk	17:6674533_6677486	2237	6.70535e-05	-2.98695	0.00455235
ENSRNOG00000019598.8	Vegfa	9:17341779_17355685	3411	6.79913e-05	-4.66622	0.00460902
ENSRNOG00000002225.6	Scarb2	14:17064091_17118245	4689	6.83711e-05	25.6233	0.00463125
ENSRNOG00000004637.7	Fbxo7	7:23815244_23816867	696	6.93612e-05	-7.92208	0.0046912
ENSRNOG00000012911.5	Erlin1	1:263810438_263812834	2396	6.97203e-05	-3.80289	0.00470836
ENSRNOG00000016207.4	Galnt1	18:16146435_16187310	3804	7.0286e-05	28.9989	0.00472869
ENSRNOG00000001783.6	Tra2b	11:82390932_82392565	1633	7.09417e-05	-8.19295	0.00476563
ENSRNOG00000009355.6	Ogfr	3:176098410_176099952	1542	7.28574e-05	-4.63026	0.00487117
ENSRNOG00000000521.4	Cdkn1a	20:6351438_6358864	1952	7.29034e-05	12.1541	0.00487117
ENSRNOG00000005987.5	Suox	7:3098226_3100523	2118	7.2953e-05	-5.15719	0.00487117
ENSRNOG00000030314.5	Golgb1	11:66761583_66765944	1684	7.30055e-05	-10.4452	0.00487117
ENSRNOG00000001083.7	Kdelr2	12:13192450_13210797	1832	7.30083e-05	2.44013	0.00487117
ENSRNOG00000030387.5	Kng1	11:81420135_81444490	3055	7.30581e-05	-3.52096	0.00487117
ENSRNOG00000014806.7	Pnkd	9:81615240_81634536	2814	7.45911e-05	3.1474	0.00496228
ENSRNOG00000005229.8	Sec16b	13:75213411_75216942	1698	7.55715e-05	-2.95311	0.00501737
ENSRNOG00000010028.4	Polr3d	15:52129470_52131193	1419	7.55876e-05	-18.3244	0.00501737
ENSRNOG00000007916.7	Ptk2	7:114436416_114437598	1182	7.57511e-05	-11.2366	0.00502388
ENSRNOG00000000967.5	Aacs	12:36512384_36529040	2475	7.64411e-05	-3.23815	0.00505898
ENSRNOG00000010652.7	Dock6	8:22822411_22825670	1449	7.67471e-05	-6.04002	0.00507548
ENSRNOG00000008015.5	Fos	6:109300432_109303846	2136	7.77424e-05	35.1657	0.00512991
ENSRNOG00000011987.3	Cd2ap	9:20856050_20862079	3834	7.83264e-05	-16.7456	0.00515701
ENSRNOG00000019680.7	Mst1	8:116857683_116862925	3233	8.01487e-05	-3.53072	0.00526923
ENSRNOG00000011781.6	Oplah	7:117353785_117356066	1481	8.13084e-05	-3.58374	0.00534069
ENSRNOG00000024212.6	Tent4b	19:19774406_19832982	5094	8.14148e-05	6.59892	0.00534069
ENSRNOG00000038951.2	Cox17	11:64962657_64968437	430	8.18449e-05	-2.15759	0.00535709
ENSRNOG00000028891.4	Cyp2t1	1:83965524_83969981	2395	8.35417e-05	-4.83499	0.00544423
ENSRNOG00000009094.4	Nudt4	7:36643666_36660340	3377	8.36098e-05	2.32617	0.00544469
ENSRNOG00000003714.6	Clk4	10:36716812_36733474	1819	8.42779e-05	-5.34971	0.0054842
ENSRNOG00000011488.7	Sergef	1:102461320_102461700	380	8.51221e-05	-10.3544	0.00552613
ENSRNOG00000032871.4	Mlc1	7:129949984_129951294	1310	8.51983e-05	-8.20248	0.00552613
ENSRNOG00000018755.6	Acss2	3:151068377_151075872	1855	8.58589e-05	-4.02295	0.00556277
ENSRNOG00000003497.4	Thoc6	10:12994301_12995674	634	8.60057e-05	-2.13964	0.00556825
ENSRNOG00000000921.6	Ubl3	12:7909403_7911563	1896	8.66351e-05	-6.13037	0.00560088
ENSRNOG00000028616.6	Pck1	3:171213914_171219887	3267	8.78477e-05	3.31264	0.00567461
ENSRNOG00000034013.5	Acaca	10:71700562_71721985	3090	8.79027e-05	-3.70531	0.00567461
ENSRNOG00000019868.7	Psma5	2:211061123_211073714	507	8.81349e-05	-56.2331	0.00568139
ENSRNOG00000009103.7	Chrac1	7:114323525_114326945	866	8.86306e-05	-5.50302	0.00570923
ENSRNOG00000007492.7	Rpn2	3:153434874_153446284	1735	8.88179e-05	-2.70346	0.00571717
ENSRNOG00000006388.5	Pygl	6:92597057_92600795	1097	9.0358e-05	-45.925	0.00579959
ENSRNOG00000054770.1	Rdh11	6:102355218_102357225	2007	9.05468e-05	-5.06519	0.00580754
ENSRNOG00000012929.6	Wsb1	10:66586906_66603151	3904	9.28179e-05	3.96535	0.00593616
ENSRNOG00000027183.6	Zfyve9	5:128234803_128267981	1095	9.3834e-05	8.17327	0.00599685
ENSRNOG00000007356.4	Chmp3	4:99449089_99496159	2593	9.41798e-05	11.5421	0.00601035
ENSRNOG00000001795.8	Itgb5	11:70057456_70106570	2027	9.45183e-05	-4.40147	0.00602765
ENSRNOG00000020440.6	Fads2	1:226131552_226133195	1643	9.49498e-05	-3.25652	0.00604654
ENSRNOG00000010196.5	Glb1	8:122510735_122511456	721	9.52657e-05	-11.6378	0.00606233
ENSRNOG00000012021.7	Ctnnbl1	3:154212201_154373265	1980	9.56884e-05	-12.8774	0.00608057
ENSRNOG00000021345.5	Timd2	10:31759209_31774177	909	9.61321e-05	29.5472	0.00609036
ENSRNOG00000047118.2	LOC683897	20:48276084_48294959	1127	9.62121e-05	-2.59034	0.00609036
ENSRNOG00000018939.7	Rexo2	8:52802603_52814321	1185	9.62522e-05	-2.81992	0.00609036
ENSRNOG00000003809.7	Sat1	X:43626479_43629778	1177	9.63197e-05	16.5632	0.00609036
ENSRNOG00000000201.7	Gsta5	8:85553614_85560975	1403	9.72595e-05	-2.53797	0.00613243
ENSRNOG00000013907.7	Sall1	19:23388327_23405042	6251	9.74701e-05	24.1848	0.00614137
ENSRNOG00000047023.2	Aldh1l1	4:123530637_123542040	586	9.77975e-05	-2.97083	0.00615766
ENSRNOG00000007241.6	Fnbp4	3:79570624_79610637	5250	9.82579e-05	19.1638	0.00618229
ENSRNOG00000009845.3	Acadm	2:260124324_260125231	907	9.89051e-05	-30.249	0.00621426
ENSRNOG00000058780.1	Igfbp1	14:87448543_87454783	6240	9.90462e-05	4.80893	0.00621868
ENSRNOG00000017223.7	Plg	1:48521771_48522789	843	9.92641e-05	-12.8835	0.00622368
ENSRNOG00000011414.5	Psmc3	3:79876937_79882324	1631	9.96372e-05	-2.81201	0.0062427
ENSRNOG00000011622.5	Echdc1	1:30874234_30875787	1553	0.000100037	-9.74353	0.00626338
ENSRNOG00000012826.5	Creb3l2	4:64865708_64916674	6430	0.000100599	6.40361	0.0062897
ENSRNOG00000017284.7	Nop16	17:10563567_10564733	728	0.000100778	-13.7193	0.00629653
ENSRNOG00000006338.7	Lrp6	4:168193910_168204265	2663	0.000101138	5.38684	0.00631016
ENSRNOG00000002052.6	Ccdc80	11:60645006_60650353	2196	0.000101354	-16.6839	0.00631927
ENSRNOG00000018105.5	Thtpa	15:33757408_33759299	1891	0.000101524	-4.77107	0.00632065
ENSRNOG00000049900.1	Irf2bp2	19:59497017_59503529	6512	0.000101562	2.96093	0.00632065
ENSRNOG00000024025.6	Edc4	19:37862325_37864667	1446	0.000101589	-6.04367	0.00632065
ENSRNOG00000007390.6	Nfkbia	6:76267224_76270536	1647	0.000102177	-17.0589	0.00635285
ENSRNOG00000004300.5	Gtf2a1	6:115320463_115321065	602	0.000103947	-14.5163	0.00644942
ENSRNOG00000012404.6	Thrsp	1:162385098_162385859	761	0.000104101	-6.21136	0.00645423
ENSRNOG00000038883.4	LOC294154	20:7331317_7397591	3679	0.000104169	5.02307	0.00645423
ENSRNOG00000021702.5	Mcmdc2	5:8977995_8980097	660	0.000104674	-8.97786	0.00648102
ENSRNOG00000028219.6	Tmem209	4:57797595_57798309	714	0.000105926	-19.3663	0.006554
ENSRNOG00000014525.5	Hspd1	9:61680331_61683967	2240	0.000106445	14.0502	0.00658151
ENSRNOG00000028323.6	Dhrsx	12:18516877_18521892	2318	0.000106778	-13.7196	0.00659754
ENSRNOG00000000064.4	Atp5me	14:2325244_2326458	374	0.000106918	-2.13394	0.00660167
ENSRNOG00000012274.8	Ddi2	5:160230952_160253956	11168	0.00010739	17.7782	0.00662306
ENSRNOG00000014901.5	Uggt1	9:42692104_42698747	4629	0.000107413	-4.37093	0.00662306
ENSRNOG00000001889.7	Comt	11:86727700_86736868	2903	0.000107732	-7.2549	0.00663814
ENSRNOG00000030443.4	Rab9a	X:29542415_29547358	1267	0.000108047	-4.51405	0.00665014
ENSRNOG00000018176.7	Rab6a	1:165624859_165664198	3575	0.000108518	5.31441	0.00666359
ENSRNOG00000018164.6	Spcs2	1:164829655_164849784	3231	0.000109266	-4.68365	0.00670492
ENSRNOG00000005513.7	Srsf5	6:104611020_104615303	2291	0.000109841	-12.5265	0.00673499
ENSRNOG00000048088.2	Mest	4:58052790_58064963	3076	0.000110404	6.78613	0.00675619
ENSRNOG00000016952.5	Uqcr11	7:12171147_12176028	734	0.00011175	-2.36573	0.00681647
ENSRNOG00000006508.6	Thnsl2	4:98976561_98995610	1816	0.00011177	-3.0277	0.00681647
ENSRNOG00000012247.6	Rab7a	4:119910457_119963088	2069	0.000112349	5.1556	0.00684705
ENSRNOG00000005958.8	Rrbp1	3:138054721_138058119	1179	0.000114489	-2.2619	0.00697276
ENSRNOG00000015768.4	Nat8f5	4:117524736_117527486	2182	0.0001147	-4.10736	0.00698085
ENSRNOG00000029223.6	Prss32	10:13202125_13202785	660	0.000115676	-2.50759	0.00703069
ENSRNOG00000001148.6	Rplp0	12:46791341_46794804	1286	0.000116054	11.8353	0.00704883
ENSRNOG00000033318.4	Rfxank	16:21036528_21037080	552	0.00011802	-45.9073	0.0071585
ENSRNOG00000054890.1	Flna	X:156486316_156487416	1100	0.000118138	-11.5418	0.00716083
ENSRNOG00000009377.6	Nelfb	3:2414447_2415499	858	0.000119209	-5.08263	0.00721593
ENSRNOG00000057194.1	Tars2	2:197860974_197870542	1640	0.000119464	-3.69568	0.00722647
ENSRNOG00000012980.5	Hyls1	8:36762789_36772203	2000	0.000119921	8.8195	0.00724434
ENSRNOG00000000723.7	RT1-CE5	20:4892701_4894473	1352	0.000120033	-2.82428	0.00724619
ENSRNOG00000046171.3	AABR07035839.1	12:24588687_24595507	4291	0.000124405	-2.65716	0.00747978
ENSRNOG00000010233.5	Cald1	4:62220735_62291489	4381	0.000124929	3.85555	0.00750626
ENSRNOG00000016150.5	Ifrd2	8:116343085_116348320	1972	0.00012607	-11.943	0.00755954
ENSRNOG00000009977.6	Thrap3	5:144178242_144188280	2283	0.000126628	-2.18004	0.0075879
ENSRNOG00000018194.7	Srrm1	5:153675589_153676601	1012	0.000127038	-3.23659	0.00760736
ENSRNOG00000005689.6	Yeats4	7:60287151_60289964	1317	0.000128358	-2.70333	0.00768125
ENSRNOG00000017693.7	Slc2a5	5:167169816_167174204	1641	0.000128481	-7.57938	0.00768134
ENSRNOG00000031387.4	Dazap1	7:12289888_12293930	1330	0.000129093	-2.3859	0.00770977
ENSRNOG00000029910.5	Golga4	8:127242930_127248938	797	0.000129646	-5.53972	0.00773479
ENSRNOG00000002408.6	Rbm47	14:43777397_43839960	4686	0.000130318	5.82926	0.00776737
ENSRNOG00000024115.4	C6	2:54460343_54513839	4994	0.000131608	-10.6762	0.00783903
ENSRNOG00000051624.1	Hspe1	9:61690914_61694241	3327	0.000132089	67.0997	0.00786241
ENSRNOG00000009117.5	Otub2	6:127297817_127301090	2494	0.000132276	-8.46824	0.00786833
ENSRNOG00000015768.4	Nat8f5	4:117524736_117527445	2185	0.000132495	-6.05933	0.00787608
ENSRNOG00000028668.6	Slc28a2	3:114646490_114647374	884	0.000133168	-8.90401	0.00791083
ENSRNOG00000003163.5	Sdhc	13:89497856_89514531	1349	0.000134625	6.0536	0.00798675
ENSRNOG00000033215.6	RT1-Db1	20:4091498_4097190	1171	0.000135314	-28.0513	0.00802232
ENSRNOG00000006747.7	Cc2d1a	19:25246900_25252807	1956	0.00013823	-6.76901	0.00816808
ENSRNOG00000012207.8	Dst	9:37915390_37957177	4816	0.00014144	9.08658	0.00833573
ENSRNOG00000008190.6	Pnpla7	3:2221280_2261895	7457	0.000142348	25.2136	0.0083837
ENSRNOG00000010478.7	LOC299282	6:128073309_128082686	3899	0.000142736	3.51061	0.008401
ENSRNOG00000046493.1	Pnpo	10:84875264_84876130	749	0.000144699	28.1662	0.00849417
ENSRNOG00000033215.6	RT1-Db1	20:4094874_4097190	1019	0.00014593	-8.16745	0.00856081
ENSRNOG00000008414.8	Bsg	7:12875303_12882753	1548	0.000146902	20.0334	0.00861221
ENSRNOG00000022153.6	Tmem134	1:219374005_219375216	346	0.000153108	-8.50221	0.0089001
ENSRNOG00000014531.7	Hbs1l	1:16875637_16896496	1421	0.000154952	-4.66085	0.00900142
ENSRNOG00000011611.8	Mapk1ip1l	15:24090255_24103349	3916	0.00015522	4.15233	0.00901114
ENSRNOG00000010389.6	Ndrg2	15:28305636_28312086	2155	0.000155342	32.9011	0.00901234
ENSRNOG00000049497.2	Eif6	3:151356863_151363213	1326	0.000155723	-3.63619	0.00902861
ENSRNOG00000052116.1	Atp11b	2:122425461_122445924	1612	0.000156263	-5.73079	0.00905402
ENSRNOG00000013461.7	Ralbp1	9:113594638_113598575	862	0.000157182	-9.55039	0.00910136
ENSRNOG00000002569.7	Mrps14	13:77940419_77946201	1292	0.000158412	-4.47622	0.00914886
ENSRNOG00000021638.6	Eef1d	7:116928122_116929902	862	0.000158517	-2.93604	0.00914902
ENSRNOG00000033195.6	A1cf	1:250490609_250515052	3655	0.000159611	13.7135	0.00919946
ENSRNOG00000013963.7	Il6st	2:44303539_44319952	6940	0.000160546	6.35862	0.00924223
ENSRNOG00000000900.6	Tpst1	12:30045750_30106938	1981	0.000160869	3.49416	0.00925486
ENSRNOG00000001239.6	Ddt	20:13824501_13832191	5828	0.000161085	-4.16029	0.00926133
ENSRNOG00000019272.6	Gkap1	17:6794760_6825144	1478	0.000161525	-2.7258	0.0092807
ENSRNOG00000006143.6	Ngly1	15:10405125_10455977	2510	0.000164212	6.55911	0.00941624
ENSRNOG00000019570.4	Gng3	1:225043258_225046151	690	0.000164411	-2.26201	0.00941624
ENSRNOG00000006859.6	Insig1	4:342170_342706	536	0.000165812	-4.19245	0.00948157
ENSRNOG00000036678.4	Aspscr1	10:109876559_109883338	398	0.000165951	-3.61449	0.00948157
ENSRNOG00000000236.7	Zfp207	10:67762994_67771146	937	0.000166098	16.3212	0.00948247
ENSRNOG00000019630.7	Hacl1	16:7714622_7733268	8319	0.000166982	-9.23288	0.00952073
ENSRNOG00000061779.1	Man2b2	14:78962472_78964961	622	0.000168547	-8.98222	0.00960247
ENSRNOG00000047967.2	Arhgef19	5:159772708_159774081	1373	0.000169197	-21.433	0.00961634
ENSRNOG00000039877.4	Smim11a	11:32450534_32460238	536	0.000170957	-6.96796	0.0096917
ENSRNOG00000000314.7	Sec63	20:47543785_47563223	4441	0.000172701	-3.67222	0.00977821
ENSRNOG00000000989.8	Bud31	12:11232935_11240436	900	0.000174653	4.66513	0.00986368
ENSRNOG00000037638.4	Timm50	1:85470799_85481161	1968	0.000175284	-2.00405	0.00987989
ENSRNOG00000046560.1	AC109096.1	1:220836091_220836504	413	0.000175437	-3.52841	0.00987989
ENSRNOG00000012928.7	Prmt9	19:34070631_34071399	503	0.000175493	-6.54099	0.00987989
ENSRNOG00000013461.7	Ralbp1	9:113579106_113599736	3601	0.000175625	-5.60349	0.00988113
ENSRNOG00000016298.7	Lysmd3	2:9526208_9535416	4217	0.000177117	3.63185	0.00995879
ENSRNOG00000016218.7	Gtf3c1	1:197032472_197034276	1133	0.000179635	-3.61206	0.0100624
ENSRNOG00000047464.2	AABR07060886.1	4:98520061_98523494	579	0.000180026	-2.82989	0.0100761
ENSRNOG00000060107.1	Dnajb14	2:243105100_243105714	211	0.000180182	-2.8022	0.0100761
ENSRNOG00000020274.4	Taf5	1:266859901_266862667	257	0.000180219	-2.07048	0.0100761
ENSRNOG00000027049.6	Atp5mf	12:11195039_11199147	1265	0.000182328	-9.85145	0.0101799
ENSRNOG00000008652.6	Phip	8:90417762_90422583	728	0.000182417	-25.6555	0.0101799
ENSRNOG00000031211.6	Acsm5	1:189246988_189270633	4806	0.000184282	-14.8078	0.0102763
ENSRNOG00000034290.4	Ccl21	5:58197677_58198792	848	0.000184733	10.3872	0.0102883
ENSRNOG00000054863.1	Usp4	8:117163084_117170519	1663	0.00018482	-5.86303	0.0102883
ENSRNOG00000023150.5	Gpi	1:90063082_90069161	1394	0.000185378	-4.35493	0.0103088
ENSRNOG00000002456.6	Hlf	10:77836354_77845637	4712	0.000186895	-5.81268	0.0103844
ENSRNOG00000012786.7	Pgrmc1	X:123205258_123214295	2866	0.000187648	2.19906	0.0104133
ENSRNOG00000004280.4	Tcn2	14:84173978_84179836	1103	0.000189894	-5.01686	0.0105184
ENSRNOG00000010105.6	S100a11	2:193863232_193868638	499	0.000191154	-3.36789	0.010575
ENSRNOG00000026177.6	Mgam	4:68995209_68996940	1731	0.000192441	-3.08942	0.010633
ENSRNOG00000018153.6	Rbm5	8:116502894_116512660	2031	0.00019366	-3.87524	0.0106872
ENSRNOG00000045743.2	Etnppl	2:235752782_235760622	3843	0.000193835	-12.9633	0.0106882
ENSRNOG00000042195.3	Pabpn1	15:33558267_33560421	2070	0.000193918	-2.73638	0.0106882
ENSRNOG00000058186.1	Errfi1	5:167951840_167968074	15321	0.000195738	3.45621	0.0107686
ENSRNOG00000010890.6	Bmp1	15:52166126_52171474	1524	0.000197077	-8.37405	0.0108234
ENSRNOG00000053735.1	Hebp2	1:13714355_13719832	1231	0.000197135	-9.69427	0.0108234
ENSRNOG00000010128.7	Slc27a2	3:119039870_119052542	5942	0.000197536	2.73604	0.0108341
ENSRNOG00000001559.5	Mtx2	3:61801046_61819002	921	0.000198002	-5.75089	0.0108531
ENSRNOG00000034116.6	Gk	X:54227021_54259074	3683	0.000198441	5.1107	0.0108704
ENSRNOG00000059750.1	AC141102.1	2:197992880_197999441	515	0.000198942	-24.0044	0.0108901
ENSRNOG00000019014.5	Ndst1	18:55951139_55970010	6844	0.000205892	-2.76635	0.0111895
ENSRNOG00000005686.6	Suclg2	4:127573360_127580017	209	0.000206192	-3.56308	0.0111989
ENSRNOG00000008988.4	Cyp2d2	7:123650574_123656345	3375	0.000206666	33.5653	0.011211
ENSRNOG00000019383.7	Tef	7:123034038_123058607	4157	0.000206828	-17.2892	0.011213
ENSRNOG00000009713.7	Oxa1l	15:33006978_33013801	2643	0.000209732	-2.94172	0.0113498
ENSRNOG00000003289.8	Lap3	14:70102549_70116882	2044	0.000210027	-13.1216	0.0113589
ENSRNOG00000011718.6	C1rl	4:157107468_157123960	2841	0.000210954	28.2678	0.0113952
ENSRNOG00000008912.7	Aqr	3:105570398_105571118	720	0.000211827	-6.2591	0.0114286
ENSRNOG00000003773.6	Hmox2	10:10990033_11035496	1807	0.000212936	15.8581	0.0114815
ENSRNOG00000052564.1	Gpx3	10:40254357_40255423	1066	0.000214256	-17.6568	0.0115436
ENSRNOG00000001806.7	Fetub	11:81648343_81657548	2046	0.000214346	2.17079	0.0115436
ENSRNOG00000002251.8	Sec31a	14:10904093_10909612	1288	0.000216246	-3.04791	0.0116319
ENSRNOG00000015736.6	Dhrs3	5:162835699_162843409	942	0.00021847	-3.28795	0.0117373
ENSRNOG00000037690.2	Sertad3	1:84280925_84284663	1333	0.000218845	4.4761	0.0117504
ENSRNOG00000013816.5	Cmas	4:177008697_177012448	905	0.00021963	-12.4526	0.0117784
ENSRNOG00000042696.2	Micos10	5:157548095_157573233	327	0.000219935	-7.78559	0.011786
ENSRNOG00000001142.3	Prkab1	12:46320351_46326793	1459	0.000220035	-4.29549	0.011786
ENSRNOG00000005447.5	Ypel2	10:74240729_74298629	5278	0.000222806	6.51051	0.0119058
ENSRNOG00000050210.2	RT1-CE10	20:153927_154551	624	0.00022326	-3.81935	0.011923
ENSRNOG00000007649.8	Dnm2	8:22537006_22540246	1866	0.000223566	-11.2607	0.0119322
ENSRNOG00000007139.2	Ttpa	5:34007854_34008134	280	0.000224535	-22.8972	0.0119768
ENSRNOG00000017876.6	Dnajc21	2:60419445_60446680	2124	0.000224881	5.07856	0.0119881
ENSRNOG00000021125.8	Prdx5	1:222164441_222167626	1015	0.000227017	5.19795	0.0120875
ENSRNOG00000059344.1	Tpcn1	12:41559192_41566857	2808	0.000228643	-2.71308	0.0121663
ENSRNOG00000004740.7	Mmadhc	3:35783298_35801341	1765	0.000230979	3.80824	0.0122692
ENSRNOG00000015019.6	Spg21	8:71016447_71022732	1310	0.000231514	-22.2626	0.0122757
ENSRNOG00000006375.6	Vdac1	10:37751706_37752830	1124	0.000233456	-3.29093	0.0123714
ENSRNOG00000009888.5	Timm8b	8:55037715_55039128	519	0.000235997	-3.5085	0.0124986
ENSRNOG00000017420.7	Nudt6	2:124134303_124141544	668	0.000236507	-26.1281	0.0125182
ENSRNOG00000012582.5	Eif4ebp1	16:68954521_68968278	1214	0.000239562	-4.70372	0.0126574
ENSRNOG00000030355.5	Mroh1	7:117508414_117514618	1633	0.000241608	-9.72798	0.0127504
ENSRNOG00000022392.3	Hspb8	12:45905211_45916686	11475	0.000242061	71.0678	0.0127668
ENSRNOG00000014291.7	Elp3	15:48942865_48960792	1621	0.000242649	-2.84429	0.0127902
ENSRNOG00000009950.6	Msantd2	8:39984621_39994375	4350	0.000242896	13.9691	0.0127905
ENSRNOG00000001719.6	Psmd2	11:83934086_83940628	1717	0.000243382	-2.18768	0.0127987
ENSRNOG00000012258.6	Rras2	1:178940507_178955232	1893	0.00024355	-5.51394	0.0127996
ENSRNOG00000002039.6	Evi5	14:2898015_2916933	569	0.000243687	-4.97726	0.0127996
ENSRNOG00000056728.1	G6pd	X:156291731_156293937	1521	0.000244125	-15.6822	0.0128151
ENSRNOG00000002878.6	Afm	14:19077811_19084754	1655	0.000244692	-5.27668	0.0128374
ENSRNOG00000052665.1	Onecut2	18:59829955_59883822	10616	0.000246099	7.78069	0.0129036
ENSRNOG00000045941.3	Susd6	6:104437077_104475259	523	0.000246802	-13.1949	0.0129329
ENSRNOG00000008713.6	Slc41a2	7:26604777_26608159	3382	0.000248429	5.17079	0.0130028
ENSRNOG00000002928.6	Guk1	10:45535553_45538678	982	0.000253813	-3.83176	0.0132459
ENSRNOG00000010240.6	Tent5a	8:92934984_92942205	5951	0.00025584	14.183	0.0133205
ENSRNOG00000001963.7	Mx2	11:38057540_38062719	1400	0.000256767	-5.4101	0.013361
ENSRNOG00000047986.2	Sult2a1	1:76527037_76555954	2945	0.000261089	8.90984	0.0135676
ENSRNOG00000020430.6	Wdr11	1:202813892_202816338	1063	0.000261205	-2.80755	0.0135676
ENSRNOG00000020264.5	Dhrs1	15:34424015_34431674	1787	0.000264108	6.33807	0.0136951
ENSRNOG00000001385.5	Plbd2	12:41599961_41619186	2233	0.000264548	-5.75578	0.01371
ENSRNOG00000037500.3	Pus1	12:51941707_51945933	1116	0.000269359	-4.09726	0.0139109
ENSRNOG00000020358.4	Ptov1	1:100859345_100860744	507	0.000270679	-2.60332	0.013971
ENSRNOG00000003626.6	Atp5pd	10:103967311_103970568	523	0.000271503	-2.18432	0.0140055
ENSRNOG00000000219.7	Ano10	9:4453339_4479303	969	0.000276074	6.01671	0.0142084
ENSRNOG00000016873.6	Msrb2	17:86066829_86078704	301	0.000278627	-15.563	0.014321
ENSRNOG00000005229.8	Sec16b	13:75213393_75216957	1731	0.000278691	-28.5535	0.014321
ENSRNOG00000055295.1	Pecr	9:79612395_79630536	2058	0.000278742	3.35761	0.014321
ENSRNOG00000056216.1	Casp7	1:277241206_277243266	2060	0.000279076	-3.94403	0.0143217
ENSRNOG00000007134.6	Strap	4:171740066_171745737	1749	0.000279943	-2.74274	0.0143579
ENSRNOG00000024603.4	Rps15	7:12282108_12283549	803	0.000280407	3.24323	0.0143735
ENSRNOG00000017144.4	Mea1	9:16609296_16612149	1875	0.000282603	-21.6016	0.0144505
ENSRNOG00000011984.5	Cxcl14	17:9109581_9117753	1764	0.000282659	-8.89363	0.0144505
ENSRNOG00000050860.2	Abcb11	3:55506245_55540609	5200	0.000282718	7.03219	0.0144505
ENSRNOG00000018417.4	Naa35	17:5411449_5412608	522	0.000283386	-13.4882	0.0144742
ENSRNOG00000016234.5	Ciapin1	19:10601017_10610049	1646	0.000284142	-9.4779	0.0144901
ENSRNOG00000004130.4	Anapc4	14:60472159_60472813	654	0.000284606	-16.7322	0.0144972
ENSRNOG00000012001.5	Vps37a	16:54855407_54863740	5963	0.000286684	-21.8973	0.0145947
ENSRNOG00000016957.5	Igfbp2	9:80117658_80144804	1665	0.00029007	-4.64923	0.0147503
ENSRNOG00000014119.5	Farsb	9:84324441_84353734	864	0.000291036	-3.51293	0.014791
ENSRNOG00000005184.4	Nop10	3:103747650_103748739	861	0.000295461	-8.4179	0.0149733
ENSRNOG00000019299.5	Edem2	3:151232498_151252089	1813	0.000295784	-5.17644	0.0149812
ENSRNOG00000020704.5	Tkfc	1:226642711_226652742	3602	0.000295961	-75.0645	0.0149817
ENSRNOG00000059202.1	AABR07021988.1	13:101727745_101735173	1734	0.000296365	5.0961	0.0149936
ENSRNOG00000004827.7	Papola	6:129608985_129662132	4673	0.000297307	3.83136	0.0150243
ENSRNOG00000007743.7	Mgst1	4:172119311_172135792	2154	0.00029875	2.09412	0.0150801
ENSRNOG00000030538.5	Slco1b2	4:175847044_175882304	6963	0.000306385	4.39992	0.0154046
ENSRNOG00000004659.5	Creld2	7:129812716_129819643	1246	0.000307889	4.22515	0.0154628
ENSRNOG00000003844.6	Dhx15	14:61167580_61174911	1248	0.000308818	-3.01054	0.0154964
ENSRNOG00000003719.5	Atpaf2	10:46768538_46772699	897	0.000308904	-5.35655	0.0154964
ENSRNOG00000004332.4	Egfr	14:100095136_100104205	6565	0.000309338	2.62741	0.0155007
ENSRNOG00000005809.7	Arhgdib	4:170913919_170932640	1198	0.000311708	-3.94368	0.015602
ENSRNOG00000047393.2	Krt18	7:143627699_143633141	3134	0.00031224	-7.34294	0.0156198
ENSRNOG00000012216.7	Tgfbi	17:8400121_8402940	985	0.000312955	-2.77905	0.0156469
ENSRNOG00000019223.8	Atp5f1c	17:72226565_72233742	2815	0.000314081	-2.96014	0.0156742
ENSRNOG00000013816.5	Cmas	4:177004982_177012533	1222	0.000314147	-4.69518	0.0156742
ENSRNOG00000017066.8	Zfp384	4:157550930_157552842	1912	0.000314204	-17.0867	0.0156742
ENSRNOG00000030387.5	Kng1	11:81420137_81444490	3053	0.000315652	-3.22434	0.0157123
ENSRNOG00000061832.1	Slc35a3	2:219702602_219710819	4194	0.000315754	-6.98374	0.0157123
ENSRNOG00000011307.7	Slmap	16:2112271_2125854	2550	0.000316949	-7.36156	0.0157408
ENSRNOG00000018425.8	Dym	18:71221089_71313137	880	0.000317326	-3.39279	0.0157421
ENSRNOG00000058186.1	Errfi1	5:167951840_167968074	6744	0.000317675	5.32659	0.0157507
ENSRNOG00000039744.5	RT1-CE4	20:4892876_4940259	707	0.000318988	-2.0117	0.0157952
ENSRNOG00000018304.7	Lars1	18:36524006_36536293	827	0.000319327	-4.06019	0.0157952
ENSRNOG00000000322.7	Atg5	20:49332281_49393225	1798	0.000321325	-5.84834	0.0158601
ENSRNOG00000019294.3	Stk16	9:82413117_82414338	751	0.00032148	-6.06677	0.0158601
ENSRNOG00000010352.5	Dnajc3	15:104221942_104229706	4137	0.000321896	2.08663	0.0158631
ENSRNOG00000007979.4	Phospho2	3:56030860_56038075	2158	0.000322277	5.17278	0.0158684
ENSRNOG00000022173.5	Gatad2a	16:21238039_21268504	4713	0.000322555	-13.3952	0.0158693
ENSRNOG00000013484.5	Gsta1	9:27435812_27436900	1088	0.000323949	-4.61998	0.0159291
ENSRNOG00000033245.5	Mug2	4:154255060_154276370	2214	0.000325279	2.59302	0.0159769
ENSRNOG00000007160.7	Kat14	3:138504208_138509506	924	0.00032741	-5.53712	0.0160639
ENSRNOG00000000340.7	Rtraf	15:4891462_4893968	498	0.0003285	-62.9603	0.0161086
ENSRNOG00000037911.2	LOC680227	X:74337706_74349160	4273	0.000330155	2.85595	0.0161809
ENSRNOG00000001710.5	Abcf3	11:84025241_84034471	2308	0.000331173	-7.32595	0.0162219
ENSRNOG00000052134.1	Pigy	8:23167935_23170209	1535	0.000331615	-13.1654	0.0162346
ENSRNOG00000029386.5	RT1-N2	20:3146584_3149708	1381	0.000332488	33.7929	0.0162684
ENSRNOG00000012550.6	Uqcrh	5:134919042_134927312	625	0.00033516	-2.15119	0.016381
ENSRNOG00000007315.7	Thoc2	X:128171372_128191097	1858	0.000335191	-28.8746	0.016381
ENSRNOG00000042344.1	Smim22	10:10766397_10767367	417	0.00033743	-3.26259	0.0164741
ENSRNOG00000029441.5	Klhl2	16:26849077_26852312	1486	0.000343169	-5.58692	0.0167178
ENSRNOG00000017843.6	Polr3k	3:177376181_177379060	856	0.000344029	-23.3021	0.0167419
ENSRNOG00000022372.6	Kdm1a	5:154909002_154911712	950	0.000344038	-3.91428	0.0167419
ENSRNOG00000012985.5	Pfdn5	7:143924661_143929400	646	0.0003489	-2.23978	0.0169345
ENSRNOG00000002911.5	Alb	14:19175895_19191902	2489	0.000348943	309.967	0.0169345
ENSRNOG00000016309.8	Rgp1	5:59088229_59088778	549	0.000349834	-2.45161	0.0169593
ENSRNOG00000019752.5	Slc29a1	9:17791299_17799010	2044	0.000350889	-3.10931	0.0170012
ENSRNOG00000001429.7	Lrwd1	12:23586257_23587276	705	0.000355689	-14.8521	0.0172058
ENSRNOG00000045649.2	Arrdc3	2:8739465_8745600	3525	0.000356789	-3.2709	0.0172496
ENSRNOG00000017105.7	Dpyd	2:222667466_222694630	1835	0.000360177	4.54806	0.0173664
ENSRNOG00000039865.3	Vnn3	1:22648647_22651443	937	0.000361239	-5.85057	0.0174083
ENSRNOG00000047198.2	Tatdn1	7:98782144_98786715	413	0.000363811	-7.00434	0.0175039
ENSRNOG00000005428.8	Ctbp1	14:82785881_82790133	2477	0.000364975	-24.0763	0.0175442
ENSRNOG00000050860.2	Abcb11	3:55570676_55587981	872	0.000365948	7.5112	0.0175783
ENSRNOG00000012314.4	Slirp	6:111483702_111488068	1189	0.000367313	-7.33118	0.0176344
ENSRNOG00000001979.7	Rcan1	11:32539651_32550666	5077	0.000367729	5.93326	0.0176449
ENSRNOG00000018556.3	Tomm40	1:80617276_80630142	2067	0.000369746	-11.2188	0.0177275
ENSRNOG00000003583.6	Smyd2	13:108681503_108686290	820	0.000370351	-8.20563	0.0177394
ENSRNOG00000046643.2	Cyp3a9	12:19099282_19114519	871	0.000372886	4.35008	0.0178444
ENSRNOG00000010363.6	Mrps23	10:75528978_75536767	1324	0.000373251	-3.07556	0.0178523
ENSRNOG00000000186.7	Tst	7:119616168_119616790	622	0.000374359	-4.27121	0.0178957
ENSRNOG00000023095.5	Npepps	10:85140367_85158585	2287	0.000374917	-4.02311	0.0179128
ENSRNOG00000006828.7	Baz1a	6:75827403_75832143	567	0.00037835	-22.2983	0.0180575
ENSRNOG00000062108.1	Tomm5	5:60655708_60658565	657	0.000379283	-3.62939	0.0180731
ENSRNOG00000004755.5	Commd9	3:91477377_91478104	727	0.000381102	-41.7389	0.0181501
ENSRNOG00000014628.7	Pomk	16:70862884_70869729	3115	0.000384745	-5.15858	0.0183041
ENSRNOG00000017447.5	Eif2s2	3:150395730_150412281	924	0.000386752	-2.78313	0.0183898
ENSRNOG00000011931.7	Smarca2	1:244708538_244783737	2679	0.000387423	-3.69163	0.0184075
ENSRNOG00000048989.3	Larp7	2:231873910_231882080	1476	0.000387538	-4.67004	0.0184075
ENSRNOG00000045743.2	Etnppl	2:235738392_235744312	1111	0.000388255	5.12136	0.0184318
ENSRNOG00000016360.4	Gps2	10:56524423_56527693	1908	0.000389974	-2.84339	0.0184938
ENSRNOG00000015035.7	Myo7b	18:24746656_24748852	849	0.000391022	-4.99852	0.0185238
ENSRNOG00000024115.4	C6	2:54517048_54534269	1698	0.000394498	-4.17375	0.0186786
ENSRNOG00000005310.6	Cul1	4:77278593_77280251	730	0.000396243	-3.35235	0.0187512
ENSRNOG00000001177.4	Acads	12:47260818_47263753	1645	0.000398011	-13.9573	0.018825
ENSRNOG00000013004.7	Akr1d1	4:65132510_65143983	2859	0.000401439	3.05667	0.018967
ENSRNOG00000021424.5	Cd300lf	10:103669780_103670797	1017	0.00040315	-12.0382	0.0190378
ENSRNOG00000017770.7	Cdc123	17:76410541_76454643	1709	0.000403686	-2.24993	0.019053
ENSRNOG00000030726.6	Asgr2	10:56710878_56723611	1392	0.000408448	-7.01727	0.0192487
ENSRNOG00000004883.7	Erh	6:104280394_104290690	843	0.000408478	-12.3522	0.0192487
ENSRNOG00000006895.6	Vps53	10:64222280_64222622	342	0.000408998	-32.3122	0.0192598
ENSRNOG00000001142.3	Prkab1	12:46316235_46326793	2058	0.000409247	-4.31417	0.0192598
ENSRNOG00000019598.8	Vegfa	9:17340325_17355685	4272	0.000410853	4.04535	0.0193198
ENSRNOG00000033386.5	Itih1	16:7011806_7016180	1888	0.000411623	-4.63093	0.019345
ENSRNOG00000016427.6	Letm1	14:82265476_82269998	3180	0.000411822	-14.5359	0.019345
ENSRNOG00000019573.5	Lcat	19:37913013_37916850	1721	0.00041541	2.41953	0.019476
ENSRNOG00000012879.5	Fabp3	5:148528724_148535944	1142	0.000417762	-5.69458	0.0195624
ENSRNOG00000011421.7	Smap2	5:139885250_139894157	2220	0.000420438	-2.72878	0.0196568
ENSRNOG00000001391.6	Sdsl	12:41643026_41647206	913	0.000420975	-40.4605	0.0196716
ENSRNOG00000057823.1	Ubc	12:36638490_36640520	2030	0.000422449	14.0797	0.0197301
ENSRNOG00000003144.6	Gprc5c	10:103396141_103417366	3493	0.000423191	-2.21554	0.0197544
ENSRNOG00000016265.7	Acsl5	1:276240487_276277660	1298	0.000426053	-11.2792	0.0198643
ENSRNOG00000008054.7	Igsf9	13:90815554_90818180	1670	0.000429771	-6.85871	0.0200195
ENSRNOG00000027784.4	Tsku	1:163316790_163328621	11831	0.000432759	6.44243	0.0201275
ENSRNOG00000016411.4	Rps12	1:22758244_22760283	1917	0.000433183	12.4982	0.0201367
ENSRNOG00000016751.5	Slc25a28	1:263419981_263431380	1678	0.000433852	-13.252	0.0201456
ENSRNOG00000012659.5	Vamp5	4:100230171_100242591	1846	0.000434355	-2.90708	0.0201456
ENSRNOG00000057080.1	AABR07030926.1	10:109890903_109893761	656	0.000434501	-3.91028	0.0201456
ENSRNOG00000029095.4	Trabd	7:130068762_130071431	849	0.000435496	-8.59298	0.0201812
ENSRNOG00000056596.1	Alas1	8:114927625_114933486	1522	0.000435856	-5.12867	0.0201874
ENSRNOG00000006913.7	Rpain	10:57610269_57613833	444	0.000436491	-14.5964	0.0202064
ENSRNOG00000030019.4	Atp1a1	2:204003737_204009571	1441	0.000436889	-6.92469	0.0202143
ENSRNOG00000001598.6	Usp16	11:27108389_27130341	2606	0.000440865	14.5111	0.0203561
ENSRNOG00000012136.7	Mrps30	2:51042545_51045544	977	0.000445318	-11.3235	0.0205405
ENSRNOG00000013737.6	Bcar3	2:226674629_226679530	1046	0.000450573	-5.64435	0.0207443
ENSRNOG00000004377.6	Lpin1	6:41796205_41809160	6000	0.000450726	5.25405	0.0207443
ENSRNOG00000021575.6	Cfhr2	13:56639698_56714109	5651	0.000450897	3.6137	0.0207443
ENSRNOG00000020853.7	Scap	8:118623536_118628651	2582	0.000452007	-2.28149	0.0207846
ENSRNOG00000002911.5	Alb	14:19175895_19191902	2489	0.000455714	289.551	0.0209336
ENSRNOG00000026211.6	Mri1	19:25360283_25363144	737	0.000457171	-3.43725	0.0209877
ENSRNOG00000059015.1	Triobp	7:120330503_120331735	420	0.000459033	-3.96195	0.021032
ENSRNOG00000004040.8	Abca8	10:98236918_98259174	2052	0.000460731	-9.79137	0.0210989
ENSRNOG00000014779.5	Pdcd4	1:274628911_274648309	2423	0.000463612	5.85917	0.0212091
ENSRNOG00000019282.7	Ubqln1	17:6874291_6878850	2245	0.000464723	-2.43229	0.0212382
ENSRNOG00000038832.3	AABR07064415.1	6:80188739_80212422	2057	0.00046527	5.70404	0.0212523
ENSRNOG00000002940.7	Ankrd17	14:19414460_19431515	4588	0.000468985	8.18218	0.0213739
ENSRNOG00000025100.3	Ikbke	13:48031317_48049177	2328	0.000469127	-23.1679	0.0213739
ENSRNOG00000020420.6	Pklr	2:188449677_188459592	5575	0.000472455	-3.05481	0.0214937
ENSRNOG00000008331.7	Washc4	7:26309276_26328303	3528	0.000472478	3.16418	0.0214937
ENSRNOG00000016190.6	Coq9	19:10583851_10584841	990	0.000475391	-5.00875	0.0215822
ENSRNOG00000018281.6	Uqcrfs1	17:35681443_35683345	1902	0.000475805	-2.36291	0.0215901
ENSRNOG00000013954.5	Alpl	5:156086491_156105953	2353	0.000476656	-6.68762	0.0216177
ENSRNOG00000006751.5	Psmd6	15:12407360_12416154	1573	0.000478569	-3.94096	0.0216934
ENSRNOG00000020658.5	Aarsd1	10:89317974_89331112	3339	0.000481566	-4.22146	0.0218023
ENSRNOG00000004755.5	Commd9	3:91463662_91478111	1179	0.000481702	26.3093	0.0218023
ENSRNOG00000010482.4	Impa1	2:93694914_93697091	2177	0.000482132	-5.98916	0.0218107
ENSRNOG00000002565.8	Taf1	X:71464032_71486521	2672	0.000482692	6.85105	0.0218139
ENSRNOG00000018114.7	Acadvl	10:56618281_56620889	1970	0.00048562	-3.06488	0.0219108
ENSRNOG00000009568.6	Hdac1	5:147716659_147717545	624	0.000487375	-5.11164	0.0219515
ENSRNOG00000018796.5	Herpud1	19:11046392_11051145	1885	0.000489874	-3.38876	0.0220459
ENSRNOG00000061040.1	Herc4	20:26828377_26831908	1821	0.000490302	-8.93217	0.0220463
ENSRNOG00000004342.7	Ahr	6:54963986_54972775	4107	0.000494944	4.28674	0.0222327
ENSRNOG00000000264.5	Def8	19:56257203_56259204	2001	0.000498368	-3.57163	0.0223752
ENSRNOG00000017766.7	Ca12	8:72458551_72461434	2883	0.000500141	-15.4857	0.022421
ENSRNOG00000008782.6	Pnisr	5:35991063_36018203	6354	0.000500141	19.3192	0.022421
ENSRNOG00000001602.8	Ltn1	11:27022402_27028916	2830	0.000500141	-16.8204	0.022421
ENSRNOG00000008553.7	Mthfr	5:164860083_164864364	3988	0.000501343	3.84091	0.0224466
ENSRNOG00000006623.6	Cd302	3:46327220_46361294	1574	0.000501717	-2.68977	0.0224466
ENSRNOG00000020602.7	Ndufa13	16:21281956_21282349	393	0.000502692	-12.354	0.0224677
ENSRNOG00000053468.1	Tuba1b	7:140614740_140616199	1294	0.000503509	-2.89012	0.0224706
ENSRNOG00000018795.6	Rpl18a	16:20294952_20295333	289	0.000503919	-6.05971	0.0224776
ENSRNOG00000020194.7	Hes6	9:98549692_98551425	1438	0.000506082	-4.98097	0.0225628
ENSRNOG00000020688.6	Ccdc51	8:117820510_117830868	1558	0.000506437	-5.12439	0.0225658
ENSRNOG00000019956.7	Kdm4a	5:136967286_136969326	1926	0.000508299	-9.07294	0.0226165
ENSRNOG00000004466.4	Fam210b	3:170360081_170364429	3390	0.000510156	-4.62726	0.0226491
ENSRNOG00000020950.7	Syvn1	1:221409270_221416351	3519	0.000518884	15.9534	0.0229731
ENSRNOG00000016269.7	Rpl7l1	9:16512720_16515097	303	0.000521128	14.1299	0.0230289
ENSRNOG00000009945.7	Pls1	8:103557233_103577892	2568	0.000521175	-2.93767	0.0230289
ENSRNOG00000013968.5	Comtd1	15:2631508_2635356	3044	0.000521906	-18.3058	0.0230498
ENSRNOG00000008597.6	Tada3	4:145318418_145323093	914	0.000524822	-7.2328	0.0231557
ENSRNOG00000027888.6	Cmss1	11:45304067_45330487	976	0.000525303	-4.60567	0.0231655
ENSRNOG00000002721.7	Ndufb4	11:65959878_65965306	736	0.000526236	-2.64812	0.0231934
ENSRNOG00000002794.5	Selp	13:82464962_82466484	1522	0.000526466	8.97358	0.0231934
ENSRNOG00000021173.5	Vps45	2:198183813_198184777	413	0.000526715	-4.3653	0.0231934
ENSRNOG00000013545.7	Polr2e	7:12532824_12536800	1135	0.000528379	6.65198	0.02324
ENSRNOG00000010408.7	Polr2k	7:74990407_74992657	448	0.000528555	-7.48573	0.02324
ENSRNOG00000049876.1	Prkar1a	10:97941076_97952601	856	0.000530637	3.97558	0.0233201
ENSRNOG00000053828.1	Ppp1r12c	1:72915887_72926109	2339	0.000532248	-11.5885	0.0233794
ENSRNOG00000005513.7	Srsf5	6:104611020_104615303	2294	0.00053483	-3.01223	0.0234813
ENSRNOG00000008411.6	Sec23b	3:138739418_138757355	1541	0.000535597	-3.58175	0.0235034
ENSRNOG00000019028.6	Znrf1	19:43821753_43834337	602	0.00053798	-3.83853	0.0235964
ENSRNOG00000007139.2	Ttpa	5:34007114_34024511	1625	0.000539708	4.36602	0.0236489
ENSRNOG00000012985.5	Pfdn5	7:143924903_143929400	580	0.000540835	-6.051	0.0236867
ENSRNOG00000047986.2	Sult2a1	1:76721359_76723028	530	0.000541698	-2.19255	0.0237129
ENSRNOG00000004700.7	Nxt1	3:142995832_142996589	757	0.000542382	-6.01432	0.0237227
ENSRNOG00000008812.6	Tmem214	6:26866293_26868852	2390	0.000543012	-7.00154	0.0237355
ENSRNOG00000009438.7	Serpina6	6:127523905_127534299	1624	0.000547281	-2.9655	0.0238987
ENSRNOG00000008487.7	Amotl2	8:111210714_111226226	4251	0.00054791	4.99206	0.0239145
ENSRNOG00000018491.6	Chchd5	3:121660026_121664524	1621	0.000549154	-3.783	0.0239548
ENSRNOG00000022296.4	Pnpla5	7:124988299_124990390	1496	0.000552218	-15.0649	0.0240463
ENSRNOG00000014419.7	Brd7	19:19695582_19701495	835	0.000552275	-5.38413	0.0240463
ENSRNOG00000004391.7	AABR07057436.1	7:71125510_71126267	301	0.000554133	-12.8822	0.0241155
ENSRNOG00000037580.2	Psmd8	1:88116782_88119532	977	0.000555895	-10.9169	0.0241686
ENSRNOG00000054453.1	AABR07072511.1	16:49163409_49169442	1084	0.000556734	-3.74871	0.0241815
ENSRNOG00000049223.2	Vipas39	6:111271151_111272430	1279	0.00055729	-5.92804	0.0241939
ENSRNOG00000009071.7	Gripap1	X:15523928_15534670	1853	0.000559182	-5.40138	0.0242525
ENSRNOG00000010379.7	Celf1	3:79811945_79844549	4581	0.000559725	4.47124	0.0242642
ENSRNOG00000018904.7	Dtymk	9:100921563_100923857	680	0.000565022	-7.16877	0.024482
ENSRNOG00000016665.7	Tpra1	4:120849884_120854534	1310	0.00056716	-4.70345	0.0245627
ENSRNOG00000011054.6	Laptm5	5:149066263_149069720	1474	0.000567762	-4.20666	0.024565
ENSRNOG00000005301.6	Eif2b4	6:26546772_26552818	2115	0.000570914	-3.0356	0.0246774
ENSRNOG00000009145.7	Klf12	15:84316546_84396802	9523	0.000571188	8.8944	0.0246774
ENSRNOG00000017843.6	Polr3k	3:177374704_177379008	1072	0.000571651	-5.37233	0.0246855
ENSRNOG00000055853.1	Gorasp2	3:56994494_56995431	937	0.000572782	-3.17654	0.0247223
ENSRNOG00000054468.1	Fam219b	8:62318952_62322883	2465	0.000573288	-4.4862	0.0247312
ENSRNOG00000015630.5	Cct7	4:117245737_117252265	2492	0.000574512	9.94546	0.0247611
ENSRNOG00000051592.1	AABR07044925.1	20:26831965_26836062	2477	0.000575186	4.70645	0.0247782
ENSRNOG00000005528.5	Tbk1	7:63655241_63658816	838	0.000575915	-3.80168	0.0247977
ENSRNOG00000058522.1	Fam214a	8:81921137_81941552	7696	0.000577347	6.86357	0.0248117
ENSRNOG00000000867.6	Vars1	20:5006350_5008262	824	0.000577353	-12.5339	0.0248117
ENSRNOG00000004291.6	Cltc	10:74014321_74041961	4843	0.000577727	3.50375	0.0248159
ENSRNOG00000003147.8	Sqstm1	10:35709887_35717297	5109	0.000578592	5.11743	0.0248292
ENSRNOG00000000488.4	Hmga1	20:7133084_7140154	1575	0.000579415	-9.01344	0.0248526
ENSRNOG00000008393.8	Tax1bp1	4:82820157_82832862	1486	0.000579734	-3.82765	0.0248543
ENSRNOG00000004793.6	Ncln	7:11081518_11091599	3042	0.000585032	14.5837	0.0250574
ENSRNOG00000006663.8	Usp2	8:48421791_48432526	3164	0.000585542	-3.72624	0.0250672
ENSRNOG00000048834.2	Plin3	9:10773789_10782199	2518	0.00058676	-2.06642	0.0250784
ENSRNOG00000058522.1	Fam214a	8:81928635_81941552	1502	0.000587189	-3.18946	0.0250784
ENSRNOG00000019760.6	Oxnad1	16:8234428_8235570	1142	0.000587521	-10.6794	0.0250798
ENSRNOG00000027860.6	Ggnbp2	10:72156513_72163982	2191	0.000589364	-2.98966	0.0251465
ENSRNOG00000012357.6	Unc45a	1:142118903_142120116	946	0.000590457	-6.93472	0.0251691
ENSRNOG00000003594.5	Tmem183a	13:51184511_51187014	2503	0.000598061	-17.222	0.0254568
ENSRNOG00000000847.8	Csnk2b	20:5108691_5113040	987	0.000598906	-50.3617	0.0254697
ENSRNOG00000021164.7	Stip1	1:222274129_222275357	706	0.000598935	-7.79178	0.0254697
ENSRNOG00000054770.1	Rdh11	6:102355218_102367222	2489	0.000600495	25.504	0.0255239
ENSRNOG00000008256.5	Mrpl38	10:104682371_104683324	583	0.000601962	-5.31311	0.0255741
ENSRNOG00000005203.3	Sec61g	14:99774425_99777630	435	0.000603999	-4.1132	0.0256378
ENSRNOG00000057557.1	Prlr	2:60261123_60308152	2049	0.000604262	2.14487	0.0256378
ENSRNOG00000014254.3	Cpt1a	1:218614581_218629684	3132	0.000604628	4.13033	0.0256386
ENSRNOG00000009983.6	Lrrc42	5:126835154_126850855	1602	0.000605256	-13.4725	0.0256531
ENSRNOG00000049828.1	Crlf2	14:1456841_1458435	692	0.000606681	-8.21788	0.0257012
ENSRNOG00000013766.7	Acaa2	18:70748199_70762401	1032	0.000608964	-2.22523	0.0257735
ENSRNOG00000013516.6	Sf3b1	9:61593399_61634510	6174	0.000610068	-20.3991	0.025808
ENSRNOG00000020144.5	RGD1310127	1:199687725_199689223	1498	0.000610406	-4.4325	0.0258101
ENSRNOG00000013533.7	Acin1	15:33288370_33294017	2777	0.000610846	-2.32919	0.0258165
ENSRNOG00000018044.6	Phyh	17:77286724_77294025	3207	0.000612177	3.01772	0.0258605
ENSRNOG00000060775.1	Lmo7	15:86449318_86458515	1501	0.000614875	-8.65653	0.0259622
ENSRNOG00000034116.6	Gk	X:54271116_54303884	576	0.000616662	15.9685	0.0260254
ENSRNOG00000005308.4	Tmx2	3:72072233_72076519	2034	0.000617159	-2.86706	0.026034
ENSRNOG00000014204.7	Pacsin3	3:80072477_80081080	1851	0.000618027	-2.60049	0.0260584
ENSRNOG00000034230.6	Fcrl1	2:186685045_186691051	407	0.000622823	-14.1239	0.0262358
ENSRNOG00000025406.6	Iqgap2	2:26163226_26309294	4404	0.000623373	3.69747	0.0262422
ENSRNOG00000006019.4	G0s2	13:112004139_112005118	795	0.000624639	2.56347	0.0262721
ENSRNOG00000020480.5	Fads1	1:226246516_226249138	2294	0.000624861	-3.02508	0.0262721
ENSRNOG00000018977.5	Ap3d1	7:11838617_11873994	4789	0.000628383	7.94073	0.0263953
ENSRNOG00000003661.6	Jpt1	10:104057696_104075803	1410	0.000633625	-5.46537	0.0265905
ENSRNOG00000020035.4	Cyp17a1	1:266422126_266429907	2022	0.000641796	6.89457	0.0269208
ENSRNOG00000055579.1	Tmbim6	7:141065702_141070270	2057	0.000642802	-18.6914	0.0269503
ENSRNOG00000016769.5	Rab38	1:152152427_152153457	1030	0.00064562	-8.7956	0.0270277
ENSRNOG00000059880.1	Rubcn	11:71196795_71199266	2471	0.0006503	-6.31163	0.0271754
ENSRNOG00000012237.6	Rdx	8:56570727_56593641	907	0.000650889	4.91017	0.027186
ENSRNOG00000001754.4	Wdr53	11:71787452_71788215	763	0.000651163	-20.2931	0.027186
ENSRNOG00000024278.4	Rbm42	1:89099251_89104498	989	0.000654544	-6.31977	0.0272889
ENSRNOG00000016923.5	Clptm1l	1:32281168_32284863	884	0.000656887	-10.5123	0.0273739
ENSRNOG00000022071.7	Itga2b	10:90397805_90402272	1112	0.000661947	-4.48178	0.0275462
ENSRNOG00000008474.7	Acox3	14:80312959_80328969	2974	0.00066427	2.54983	0.0276171
ENSRNOG00000019834.6	Hsp90ab1	9:17817693_17823293	2778	0.0006661	13.1982	0.0276803
ENSRNOG00000056550.1	Epb41l4b	5:74104549_74106346	1797	0.000674397	-4.00712	0.0279861
ENSRNOG00000004205.6	Pkdcc	6:6427126_6436975	2386	0.000676997	3.37396	0.0280809
ENSRNOG00000020308.6	Ech1	1:87010362_87016018	1074	0.000678143	-5.97163	0.0281154
ENSRNOG00000012081.6	Txn1	5:75049596_75062032	533	0.00068046	-2.25539	0.0281722
ENSRNOG00000014650.5	Sema4g	1:264750447_264753910	3463	0.000680868	-3.84391	0.0281761
ENSRNOG00000010944.6	Hyou1	8:48700763_48711913	4277	0.000682317	6.43941	0.028223
ENSRNOG00000003232.4	Slc9a3r1	10:103712865_103730568	2094	0.000699634	-2.21137	0.0287926
ENSRNOG00000016776.5	Extl1	5:152573756_152589719	4125	0.000704767	-4.35223	0.028983
ENSRNOG00000050748.3	Dpp9	9:10871246_10882649	2334	0.000704908	-6.75635	0.028983
ENSRNOG00000015461.7	Serpine2	9:85560851_85626117	2086	0.000705546	7.28783	0.0289959
ENSRNOG00000011446.7	Vill	8:127747346_127753475	1651	0.000709734	-3.49352	0.0291546
ENSRNOG00000001243.7	Zcchc8	12:38318274_38327274	3392	0.000716655	-7.6555	0.029365
ENSRNOG00000002125.5	Ccni	14:16341524_16364650	3079	0.00071683	3.79899	0.029365
ENSRNOG00000061039.1	Prpf31	1:64151315_64151817	502	0.000718931	-4.72801	0.0294376
ENSRNOG00000017093.6	Pxdc1	17:30983740_30994654	1494	0.000722598	-3.20679	0.0295489
ENSRNOG00000003020.6	Slc25a47	6:132762177_132768866	2604	0.000722692	22.7696	0.0295489
ENSRNOG00000052025.1	Tle5	7:11013671_11015347	484	0.000723303	-15.6672	0.0295489
ENSRNOG00000059900.1	Bst2	16:19941252_19942463	1211	0.000727321	5.72952	0.0296821
ENSRNOG00000021405.6	Cyp2c7	1:148099744_148119980	804	0.000727559	4.19506	0.0296821
ENSRNOG00000021808.4	Tecr	19:24705477_24707694	1183	0.00072936	-5.17651	0.0297284
ENSRNOG00000000177.3	Plpp2	7:13062180_13070281	1626	0.000730755	-25.5475	0.0297717
ENSRNOG00000003977.5	Dusp1	10:16971530_16973424	1894	0.000740108	10.9938	0.0301253
ENSRNOG00000019840.4	Mdp1	15:34336041_34338956	1911	0.000747798	-7.84687	0.0303829
ENSRNOG00000025025.6	Dnttip2	2:225861169_225867101	1496	0.000748768	-10.8843	0.0303947
ENSRNOG00000013271.5	Ireb2	8:59500544_59503682	3138	0.00075209	-3.85863	0.0305018
ENSRNOG00000038881.2	Hcls1	11:66736963_66740735	1356	0.000753334	-8.61947	0.0305107
ENSRNOG00000014779.5	Pdcd4	1:274625223_274648309	2504	0.000755302	-19.7225	0.0305766
ENSRNOG00000019666.7	Ubxn1	1:225069586_225071957	890	0.00076169	-13.7248	0.0308138
ENSRNOG00000019302.3	Stx4	1:199287407_199295187	1669	0.000764905	-2.1355	0.0309118
ENSRNOG00000006997.8	App	11:24424916_24589526	3133	0.000765329	4.47919	0.0309125
ENSRNOG00000020254.7	Per2	9:98582876_98597382	1123	0.000766143	-11.9951	0.0309174
ENSRNOG00000033164.5	Cyp2b3	1:83199979_83247167	21869	0.000767	4.06899	0.030938
ENSRNOG00000006467.4	Eif2b2	6:109043879_109051258	2421	0.000768535	-12.8776	0.0309859
ENSRNOG00000021824.5	Dnajb1	19:24747225_24754715	7267	0.000769663	88.0625	0.0310174
ENSRNOG00000019407.5	Dmap1	5:136532846_136534602	1422	0.000770145	-4.66506	0.0310228
ENSRNOG00000016727.5	Akr1a1	5:135482002_135483781	394	0.000770722	-123.866	0.0310262
ENSRNOG00000010224.6	Rab30	1:157646051_157662073	3565	0.000770924	5.9457	0.0310262
ENSRNOG00000009615.7	Mtor	5:165369171_165373967	1052	0.000772902	-20.0298	0.0310918
ENSRNOG00000010603.3	Gzma	2:44968764_44981463	894	0.00077767	-11.4779	0.0312555
ENSRNOG00000010452.7	Cycs	4:80332287_80333380	298	0.00077903	-2.02868	0.0312961
ENSRNOG00000006302.4	Gclc	8:85090940_85097618	1915	0.000796335	-2.25825	0.0318766
ENSRNOG00000004147.7	Abca8a	10:98318628_98326102	2351	0.000798864	-2.48056	0.0319588
ENSRNOG00000032895.5	Cyp4f4	7:14904273_14907454	3181	0.000799287	-6.80454	0.0319588
ENSRNOG00000010658.6	LOC103691744	2:264266227_264277344	1659	0.000799463	2.14398	0.0319588
ENSRNOG00000027990.4	Crip1	6:137965213_137967046	439	0.000800879	-3.20447	0.0319868
ENSRNOG00000010474.7	Hmces	4:119833321_119841006	2188	0.000802421	-2.30365	0.0320308
ENSRNOG00000022296.4	Pnpla5	7:124988523_124990413	1295	0.000802697	-6.20611	0.0320308
ENSRNOG00000019598.8	Vegfa	9:17341779_17355685	3339	0.000809211	-6.73654	0.0322248
ENSRNOG00000006924.7	Tmem125	5:137370576_137374457	3251	0.00080998	-2.88368	0.032235
ENSRNOG00000005795.7	Aasdhppt	8:1439324_1450256	1206	0.000810989	7.98056	0.0322545
ENSRNOG00000016088.8	Cdk10	19:56024891_56032605	1658	0.000811192	-5.36188	0.0322545
ENSRNOG00000009889.6	Pgm1	5:118795229_118803089	1096	0.000812134	-4.27686	0.0322776
ENSRNOG00000004342.7	Ahr	6:54963718_55003139	13235	0.000813137	15.5431	0.0323031
ENSRNOG00000013963.7	Il6st	2:44290074_44317105	5132	0.000816636	4.781	0.0324277
ENSRNOG00000012084.5	Xpnpep1	1:273708106_273717524	1197	0.000819877	-2.37405	0.0325189
ENSRNOG00000042905.3	RT1-T24-4	20:3195127_3196566	1134	0.000822019	-6.84081	0.0325691
ENSRNOG00000008218.6	Atp6v0e2	4:78170726_78172047	1321	0.000822943	-3.09327	0.0325912
ENSRNOG00000006966.7	Nfia	5:116593429_116752855	3960	0.000823605	22.3172	0.032603
ENSRNOG00000033663.5	P4ha2	10:39452798_39464188	1458	0.000824173	-5.34193	0.032611
ENSRNOG00000017829.5	Ssu72	5:173181580_173182720	552	0.000828151	-54.3547	0.0327394
ENSRNOG00000002529.6	Rap2c	X:138224037_138237302	3314	0.000828589	6.78668	0.0327423
ENSRNOG00000018149.5	Smarca5	19:30964319_30969533	1720	0.00083047	-3.82649	0.0327876
ENSRNOG00000002342.6	Aldh3a2	10:47525484_47528461	1538	0.000831059	-2.69484	0.0327964
ENSRNOG00000001524.7	Hat1	3:58062153_58070068	795	0.000831834	-4.42297	0.0328125
ENSRNOG00000053210.1	Zc3h11a	13:50234184_50238105	3599	0.000833742	-12.2712	0.0328475
ENSRNOG00000016273.5	Fam136a	4:118160114_118166065	1642	0.000833824	-9.62012	0.0328475
ENSRNOG00000043201.2	Coq8a	13:98463736_98480445	784	0.000838311	-22.17	0.0330096
ENSRNOG00000007041.6	Abcg2	4:88887457_88890662	850	0.00084901	-8.84315	0.0333868
ENSRNOG00000055309.1	Drg2	10:46830202_46831345	812	0.000852354	-2.22235	0.0334804
ENSRNOG00000030654.5	Man2c1	8:61808136_61816807	2935	0.000852889	-2.98069	0.0334804
ENSRNOG00000031743.5	Gbp2	2:248291394_248293837	837	0.00085791	-3.8003	0.0336184
ENSRNOG00000021405.6	Cyp2c7	1:148053775_148055118	328	0.000858493	-13.7912	0.0336265
ENSRNOG00000013746.6	Senp3	10:56277605_56279059	790	0.000870458	-3.47623	0.0340413
ENSRNOG00000023910.3	Man2b1	19:26215257_26216871	1177	0.000870531	-9.32961	0.0340413
ENSRNOG00000010944.6	Hyou1	8:48700748_48711917	4296	0.000870606	9.10675	0.0340413
ENSRNOG00000005360.8	Dhrs7b	10:47065736_47111232	1489	0.000873535	-5.19462	0.034116
ENSRNOG00000003975.6	Pfn1	10:57272992_57277091	2211	0.000873663	-2.12914	0.034116
ENSRNOG00000000414.7	Cep85l	20:34643658_34683544	4047	0.000877755	13.8475	0.0342309
ENSRNOG00000059593.1	Cetn2	X:152927682_152932817	1310	0.000887389	-2.21212	0.0345313
ENSRNOG00000000219.7	Ano10	9:4449518_4453539	380	0.000893369	6.34929	0.0347488
ENSRNOG00000054013.1	Clec4g	12:2273597_2274835	596	0.000896042	-2.17606	0.0348073
ENSRNOG00000007324.7	Plxna2	13:113565108_113571694	5601	0.000898222	-10.5476	0.0348617
ENSRNOG00000006985.7	Ccnk	6:132109453_132113646	1478	0.00089979	-4.33905	0.0348922
ENSRNOG00000009934.4	Emc3	4:145471453_145474496	1313	0.000908232	-2.66978	0.0351433
ENSRNOG00000016722.8	Xpo6	1:197500512_197506200	1246	0.000909231	-4.95597	0.035166
ENSRNOG00000000527.6	Mtch1	20:6937334_6939135	894	0.000909605	-2.12047	0.035166
ENSRNOG00000057578.1	Prodh2	1:88963513_88968507	1718	0.000914813	-3.36966	0.0353368
ENSRNOG00000018186.5	Lamtor5	2:210035171_210039460	634	0.000922787	-3.97168	0.035614
ENSRNOG00000010748.8	Mtus1	16:54291250_54386129	6156	0.00093917	5.4917	0.0361994
ENSRNOG00000001139.8	Suds3	12:45220094_45221515	1421	0.000943784	-3.51743	0.0363063
ENSRNOG00000007671.4	Smu1	5:57038864_57050440	4877	0.000943975	-4.36217	0.0363063
ENSRNOG00000039807.4	Fam193b	17:9618817_9628503	1737	0.000947224	-4.25181	0.0364156
ENSRNOG00000026177.6	Mgam	4:68952076_68972098	2152	0.00094769	4.97736	0.0364178
ENSRNOG00000010284.6	St3gal5	4:99998679_99999916	1237	0.000948985	-3.05883	0.0364517
ENSRNOG00000008672.7	Chmp5	5:57269093_57284459	1125	0.000949388	-12.0709	0.0364517
ENSRNOG00000004649.4	Il1b	3:121876256_121882726	1402	0.000952382	4.29934	0.0365352
ENSRNOG00000000827.6	Ier3	20:3438762_3440173	1304	0.000953333	14.7638	0.036556
ENSRNOG00000005618.3	Fmc1	4:66276809_66284868	1361	0.000959878	-3.22279	0.0367614
ENSRNOG00000012473.5	Cflar	9:65534647_65587685	7094	0.000960471	5.92789	0.0367614
ENSRNOG00000004477.7	Ublcp1	10:30103472_30104777	1305	0.000960515	-11.3904	0.0367614
ENSRNOG00000008713.6	Slc41a2	7:26511846_26608159	4958	0.000960746	3.09478	0.0367614
ENSRNOG00000018748.8	Slc16a11	10:56825291_56826479	1102	0.000964491	-4.58196	0.0368731
ENSRNOG00000023383.6	Ddx3x	X:10400356_10408936	4741	0.000965528	10.7842	0.036897
ENSRNOG00000008193.7	Cr1l	13:113824590_113843379	1064	0.000968088	-3.9763	0.036979
ENSRNOG00000027569.7	Trappc9	7:113986362_113987605	819	0.000972459	-2.41787	0.037099
ENSRNOG00000020464.5	Mrpl54	7:11320978_11323577	689	0.000973523	-12.1086	0.0371231
ENSRNOG00000026616.4	Ndufb2	4:67378166_67385271	482	0.000980868	-3.37647	0.0373235
ENSRNOG00000028358.6	Edem3	13:69187544_69197952	4372	0.000982635	2.45202	0.037374
ENSRNOG00000002580.7	Trmt1l	13:68800468_68819405	2281	0.000985122	-10.0698	0.037374
ENSRNOG00000019698.3	Ssbp4	16:20578130_20589295	1476	0.000985122	-12.2741	0.037374
ENSRNOG00000013078.6	Zcchc7	5:60428868_60430119	1251	0.000993618	-2.53344	0.0376352
ENSRNOG00000002185.6	Pgm2	14:45829349_45853009	1349	0.000996297	-11.3713	0.0376793
ENSRNOG00000020660.7	Cfl1	1:220869765_220872209	575	0.00099763	-4.3698	0.0377044

## Sheet: CT vs. H120
The novel differentially expressed transcripts (P < 0.001, FDR < 0.05, |FC| > 2) length associated with annotated genes identified in liver in CT vs. H120.
Gene ID	Gene name	Position	Transcript length (bp*)	P-value	FC	FDR
ENSRNOG00000009488.4	Cyp7a1	5:19358603-19365730	3527	1.61247e-44	-80.16	1.38069e-39
ENSRNOG00000057626.1	Kif1b	5:165946096-165950724	716	4.63624e-38	-17.7893	1.98491e-33
ENSRNOG00000012026.6	Psmc2	4:9866944-9873361	1282	9.97332e-29	-230.087	2.84658e-24
ENSRNOG00000018755.6	Acss2	3:151068377-151075872	1855	5.90914e-28	-4.21639	1.26494e-23
ENSRNOG00000045636.2	Fasn	10:109987072-109990737	3194	6.14167e-26	-12.3768	1.05177e-21
ENSRNOG00000016924.8	Acly	10:88391632-88406903	2800	1.57574e-25	-16.4107	2.24874e-21
ENSRNOG00000056457.1	Gpd1	7:141370473-141377972	2932	1.29165e-24	-4.77816	1.57998e-20
ENSRNOG00000039744.5	RT1-CE4	20:4955836-4956723	887	8.73105e-21	212.608	7.47605e-17
ENSRNOG00000017689.7	Itih3	16:6992055-7007287	3512	9.01072e-20	5.56393	7.0141e-16
ENSRNOG00000002342.6	Aldh3a2	10:47525484-47528461	1538	5.57299e-19	-3.90617	3.81765e-15
ENSRNOG00000017235.6	Atp6v0d1	19:37481769-37486982	1274	6.12099e-19	-6.76587	3.81765e-15
ENSRNOG00000017481.6	Sucla2	15:55474865-55516957	1838	1.04136e-17	-16.1099	5.9445e-14
ENSRNOG00000019598.8	Vegfa	9:17348540-17355682	2152	1.587e-17	-158.903	8.49303e-14
ENSRNOG00000003228.5	Mid1ip1	X:13114555-13116261	1706	5.31333e-17	-7.53844	2.52755e-13
ENSRNOG00000014907.5	Aldh8a1	1:16921476-16930510	2278	5.74203e-17	-11.8239	2.58772e-13
ENSRNOG00000043098.1	Mt2A	19:11307955-11308892	937	2.46664e-16	8.32463	9.6004e-13
ENSRNOG00000017693.7	Slc2a5	5:167172588-167174210	1055	3.84924e-16	-20.2434	1.43302e-12
ENSRNOG00000013376.6	Mvd	19:55258904-55263463	1359	5.96473e-16	-23.5724	2.12807e-12
ENSRNOG00000045636.2	Fasn	10:109987072-109995877	6219	1.49414e-15	-4.39353	4.92067e-12
ENSRNOG00000057814.1	Nsdhl	X:152959629-152964409	2319	1.63041e-15	-4.21511	4.98592e-12
ENSRNOG00000057814.1	Nsdhl	X:152959629-152964410	2320	2.91972e-15	-4.2933	8.62082e-12
ENSRNOG00000032297.2	Msmo1	16:26871250-26875975	1386	8.10152e-15	-6.57658	2.31234e-11
ENSRNOG00000010887.6	RGD1309534	8:13838548-13861212	2512	9.78352e-15	-14.9994	2.57754e-11
ENSRNOG00000016690.6	Idi1	17:57976104-57978445	2341	9.93377e-15	-8.99039	2.57754e-11
ENSRNOG00000057623.1	Copb1	1:183695467-183696022	555	1.1748e-14	-8.41724	2.80818e-11
ENSRNOG00000005266.7	Amdhd1	7:34397375-34406408	1251	1.18065e-14	28.6757	2.80818e-11
ENSRNOG00000056596.1	Alas1	8:114927625-114933486	1522	3.19728e-14	-14.8364	7.39921e-11
ENSRNOG00000010170.5	Tubb4b	3:2441578-2442531	953	6.46407e-14	-2.27557	1.40066e-10
ENSRNOG00000026965.6	Tmem140	4:62380473-62391912	1811	9.85151e-14	6.04157	2.05743e-10
ENSRNOG00000003147.8	Sqstm1	10:35713003-35716311	1007	1.32467e-13	3.73387	2.70063e-10
ENSRNOG00000020385.3	Fads3	1:226105975-226114522	6647	1.42482e-13	-4.61498	2.83725e-10
ENSRNOG00000005987.5	Suox	7:3098226-3100523	2118	1.55716e-13	-5.12238	2.96296e-10
ENSRNOG00000015774.5	Mreg	9:79489816-79545333	2891	1.8356e-13	3.69523	3.41685e-10
ENSRNOG00000061108.1	Arcn1	8:49051188-49053309	2121	5.35496e-13	-8.95778	9.35762e-10
ENSRNOG00000010558.7	Ppif	16:1980509-1985916	1277	5.83752e-13	-10.7629	9.99686e-10
ENSRNOG00000009094.4	Nudt4	7:36643666-36660340	3374	6.63578e-13	281.272	1.11411e-09
ENSRNOG00000000967.5	Aacs	12:36512384-36529040	2475	9.15739e-13	-7.81824	1.5079e-09
ENSRNOG00000016552.6	Hmgcs1	2:52440365-52445268	2532	1.06356e-12	-5.7306	1.71828e-09
ENSRNOG00000001142.3	Prkab1	12:46320351-46326793	1459	2.30501e-12	-11.7048	3.52445e-09
ENSRNOG00000011016.7	Slc7a2	16:54455034-54513349	7529	2.66134e-12	6.39184	3.9979e-09
ENSRNOG00000034013.5	Acaca	10:71718001-71721985	2493	3.1422e-12	-3.40434	4.63887e-09
ENSRNOG00000061876.1	Tas1r2	5:158114094-158115734	1640	7.17671e-12	-2.84073	1.0074e-08
ENSRNOG00000003524.4	Lrrc59	10:82357348-82367047	2311	8.91478e-12	-8.50497	1.23119e-08
ENSRNOG00000002478.5	Insig2	13:37264792-37292717	2640	9.37538e-12	5.35848	1.25777e-08
ENSRNOG00000030538.5	Slco1b2	4:175847044-175882304	6963	9.40106e-12	4.90556	1.25777e-08
ENSRNOG00000014162.5	Plekhb2	9:41362580-41381101	3188	9.89162e-12	-48.4686	1.29623e-08
ENSRNOG00000017689.7	Itih3	16:6992055-7007287	3407	1.18491e-11	2.45698	1.51432e-08
ENSRNOG00000048088.2	Mest	4:58052785-58064962	3080	1.25716e-11	43.3482	1.51613e-08
ENSRNOG00000011696.6	Lifr	2:56436722-56489446	5267	2.01055e-11	88.85	2.39105e-08
ENSRNOG00000011300.8	AABR07031193.1	18:3930967-3941381	1445	2.04008e-11	-16.3571	2.39293e-08
ENSRNOG00000022268.6	Pnpla3	7:125045206-125057547	4209	2.52658e-11	-43.0706	2.92352e-08
ENSRNOG00000017689.7	Itih3	16:6992055-7007287	3452	2.88253e-11	3.0821	3.24762e-08
ENSRNOG00000057626.1	Kif1b	5:165964272-165982325	3980	3.3266e-11	-3.41983	3.69927e-08
ENSRNOG00000009832.6	Slc39a14	15:51980516-51987776	5932	5.03274e-11	-16.818	5.32016e-08
ENSRNOG00000005266.7	Amdhd1	7:34361467-34367046	3536	5.92725e-11	9.25495	6.18935e-08
ENSRNOG00000020194.7	Hes6	9:98549685-98551608	1529	9.98423e-11	-5.92913	9.94081e-08
ENSRNOG00000043098.1	Mt2A	19:11307955-11308830	746	1.10874e-10	4.886	1.09123e-07
ENSRNOG00000016470.6	Ndufa10l1	9:99617049-99638647	1123	1.26112e-10	-91.971	1.2173e-07
ENSRNOG00000016166.4	Pdlim1	1:259308315-259335815	1256	1.26527e-10	-3.87811	1.2173e-07
ENSRNOG00000011817.6	Rpl22l1	2:115363870-115364739	454	1.57767e-10	-3.99333	1.501e-07
ENSRNOG00000004284.4	Btg1	7:37812514-37815088	1778	1.84068e-10	3.75406	1.73198e-07
ENSRNOG00000046171.3	AABR07035839.1	12:24588681-24595442	2706	2.27323e-10	71.509	2.09299e-07
ENSRNOG00000004555.5	Sec14l4	14:84283265-84292393	4519	2.32952e-10	-4.83647	2.122e-07
ENSRNOG00000012911.5	Erlin1	1:263810438-263812834	2396	3.06085e-10	-3.7585	2.67437e-07
ENSRNOG00000032908.5	Acaa1a	8:128035735-128038350	2297	3.21753e-10	-2.53028	2.78288e-07
ENSRNOG00000011014.7	Copg2	4:58064405-58064963	558	3.58671e-10	-59.5404	3.07115e-07
ENSRNOG00000046493.1	Pnpo	10:84874781-84875596	815	4.5973e-10	-7.59112	3.8593e-07
ENSRNOG00000005615.6	Gadd45a	4:97782508-97784842	1244	4.6463e-10	-8.40463	3.86256e-07
ENSRNOG00000046171.3	AABR07035839.1	12:24588681-24595442	2709	5.01443e-10	60.0355	4.12851e-07
ENSRNOG00000011913.7	Cp	2:104751586-104790378	5793	5.23549e-10	4.0579	4.26947e-07
ENSRNOG00000021240.4	Atrn	3:123493991-123537923	3756	5.8012e-10	5.12111	4.68616e-07
ENSRNOG00000011200.3	Bhmt	2:23236238-23239717	1322	7.21244e-10	-6.29542	5.77171e-07
ENSRNOG00000019598.8	Vegfa	9:17340325-17355685	4344	8.08084e-10	7.06311	6.29028e-07
ENSRNOG00000006130.7	Rab5b	7:3104261-3107258	2997	9.60677e-10	-7.27069	7.41072e-07
ENSRNOG00000003232.4	Slc9a3r1	10:103712865-103730568	2094	1.8864e-09	-3.19929	1.36886e-06
ENSRNOG00000020467.4	Nrep	18:26183510-26212747	2227	2.27545e-09	-4.69325	1.63729e-06
ENSRNOG00000038366.5	Larp1b	2:127844544-127869981	1167	2.41153e-09	-21.7041	1.69736e-06
ENSRNOG00000010233.5	Cald1	4:62220735-62291489	4381	3.6123e-09	3.42057	2.47445e-06
ENSRNOG00000020775.8	Cyp2b2	1:83118983-83119568	585	3.69821e-09	-19.5563	2.5132e-06
ENSRNOG00000006375.6	Vdac1	10:37751706-37752830	1124	3.79862e-09	-4.37834	2.56111e-06
ENSRNOG00000011052.6	Gars	4:85264904-85276080	1066	4.44783e-09	-18.7067	2.92961e-06
ENSRNOG00000006302.4	Gclc	8:85090940-85097618	1915	4.87431e-09	-3.54701	3.18601e-06
ENSRNOG00000028616.6	Pck1	3:171213914-171219887	3267	5.63102e-09	6.5796	3.62527e-06
ENSRNOG00000002456.6	Hlf	10:77836354-77845637	4712	6.35368e-09	-9.00823	4.03845e-06
ENSRNOG00000015591.5	Cndp2	18:81521958-81525928	1355	6.36712e-09	-3.02727	4.03845e-06
ENSRNOG00000031896.5	Stt3a	8:39204217-39220846	4544	6.45928e-09	-13.1475	4.0397e-06
ENSRNOG00000012650.5	Mrpl3	8:113622714-113626893	754	6.46345e-09	-7.52171	4.0397e-06
ENSRNOG00000025053.5	Lrp1	7:70845792-70868523	7681	6.88447e-09	30.8881	4.24093e-06
ENSRNOG00000008190.6	Pnpla7	3:2249493-2261895	6874	7.55526e-09	7.79277	4.55582e-06
ENSRNOG00000006916.7	Sardh	3:5735778-5740704	2892	8.45228e-09	-2.96345	5.06108e-06
ENSRNOG00000012106.4	Dnaja4	8:59278911-59295511	3006	8.53575e-09	9.35169	5.07557e-06
ENSRNOG00000015768.4	Nat8f5	4:117524736-117527486	2182	8.70413e-09	-6.51939	5.14e-06
ENSRNOG00000006663.8	Usp2	8:48421791-48432526	3164	9.0439e-09	-14.7894	5.30406e-06
ENSRNOG00000000158.5	Cdo1	18:40714981-40717153	2172	9.62323e-09	3.65864	5.56756e-06
ENSRNOG00000020480.5	Fads1	1:226246516-226249138	2294	1.31565e-08	-6.44502	7.37728e-06
ENSRNOG00000014288.8	Fn1	9:78919401-78934484	1661	1.36394e-08	7.95155	7.5837e-06
ENSRNOG00000010714.7	Fgl1	16:54185489-54188714	3225	1.38345e-08	5.62108	7.59356e-06
ENSRNOG00000016509.6	Usp10	19:52608299-52608937	638	1.47228e-08	-6.13089	7.97881e-06
ENSRNOG00000009889.6	Pgm1	5:118795229-118803089	1096	1.52787e-08	-3.63054	8.22803e-06
ENSRNOG00000011039.7	Gch1	15:23947024-23969026	664	1.63154e-08	74.0663	8.67714e-06
ENSRNOG00000012594.7	Sugt1	15:61892053-61914260	974	1.66981e-08	-44.5519	8.82588e-06
ENSRNOG00000009946.7	Ldlr	8:22768162-22775245	3006	1.74146e-08	-3.3419	9.1481e-06
ENSRNOG00000053086.1	Selenop	2:53106046-53116420	2292	1.79062e-08	3.01227	9.349e-06
ENSRNOG00000000658.7	Acacb	12:48127147-48130831	2422	1.81227e-08	-3.07489	9.40471e-06
ENSRNOG00000010478.7	LOC299282	6:128073309-128082686	3899	1.89146e-08	5.67977	9.75653e-06
ENSRNOG00000017976.5	Slco2b1	1:164623276-164628478	3171	2.06159e-08	-19.5422	1.05075e-05
ENSRNOG00000017381.8	Itih4	16:6973624-6986324	5428	2.42298e-08	3.21137	1.21328e-05
ENSRNOG00000053468.1	Tuba1b	7:140614741-140638685	1202	2.53544e-08	-5.86265	1.25491e-05
ENSRNOG00000006652.6	Ddx1	6:38422887-38425636	855	2.55381e-08	-3.65407	1.25674e-05
ENSRNOG00000019742.5	Stat3	10:88790390-88842238	4450	2.63617e-08	4.69421	1.28253e-05
ENSRNOG00000043105.3	Lyrm2	5:48047888-48050192	1577	2.8234e-08	-6.95896	1.35818e-05
ENSRNOG00000013766.7	Acaa2	18:70748199-70762401	1032	2.94462e-08	-2.07811	1.40858e-05
ENSRNOG00000002186.4	Nudt9	14:7036809-7045576	876	2.9743e-08	-7.61204	1.41487e-05
ENSRNOG00000010389.6	Ndrg2	15:28305636-28312086	2155	3.25855e-08	-13.8297	1.50009e-05
ENSRNOG00000001344.7	Aldh2	12:40466274-40498941	2315	3.38676e-08	2.55899	1.55077e-05
ENSRNOG00000023376.4	Riok3	18:3587172-3591110	2135	3.67706e-08	-13.7038	1.67475e-05
ENSRNOG00000012458.7	Cyp2e1	1:213511637-213522214	5255	3.77238e-08	3.46595	1.70907e-05
ENSRNOG00000012929.6	Wsb1	10:66586895-66603310	2613	3.83433e-08	6.1142	1.72799e-05
ENSRNOG00000049142.2	Hdgfl2	9:10972336-10976766	1693	4.20849e-08	-19.1635	1.86713e-05
ENSRNOG00000045743.2	Etnppl	2:235738385-235760654	5312	4.3534e-08	14.7367	1.91936e-05
ENSRNOG00000018186.5	Lamtor5	2:210035171-210039460	634	4.37294e-08	-47.7713	1.91936e-05
ENSRNOG00000004466.4	Fam210b	3:170354104-170364270	3386	4.39347e-08	55.5428	1.91936e-05
ENSRNOG00000009005.7	Slco2a1	8:111569598-111580547	5083	4.44791e-08	-46.4234	1.93328e-05
ENSRNOG00000011661.5	Hnrnph2	X:105417633-105423533	2403	4.5044e-08	10.3634	1.94795e-05
ENSRNOG00000007395.6	Baat	5:64762206-64777625	13429	4.74592e-08	6.26241	2.04208e-05
ENSRNOG00000036678.4	Aspscr1	10:109876559-109883338	398	4.89293e-08	-6.5925	2.07827e-05
ENSRNOG00000025443.4	Map1lc3a	3:150801768-150802937	800	4.90284e-08	-25.2727	2.07827e-05
ENSRNOG00000002947.8	Dpt	13:83101716-83102923	1207	5.25535e-08	-5.88236	2.20586e-05
ENSRNOG00000013223.6	Fah	1:146713628-146727552	2763	5.57171e-08	-3.36649	2.32724e-05
ENSRNOG00000004814.6	Elob	10:13162445-13166238	866	5.85811e-08	-5.00552	2.42322e-05
ENSRNOG00000020444.3	Hcn3	2:188460452-188463214	1596	5.8997e-08	-7.42463	2.42869e-05
ENSRNOG00000048834.2	Plin3	9:10773883-10782199	2225	6.63225e-08	-5.69692	2.70425e-05
ENSRNOG00000018876.6	Entr1	3:3827460-3828467	1007	6.74101e-08	-9.74564	2.73557e-05
ENSRNOG00000018964.2	Gss	3:151076251-151086332	1232	6.84762e-08	-3.18115	2.75989e-05
ENSRNOG00000021316.4	Tmem98	10:68182080-68184320	939	7.00496e-08	-79.0541	2.80283e-05
ENSRNOG00000015124.6	Gpam	1:275843816-275847336	3520	7.32573e-08	-3.41913	2.90483e-05
ENSRNOG00000018677.3	Akt2	1:84418335-84453072	4706	7.44799e-08	-11.4526	2.9389e-05
ENSRNOG00000014650.5	Sema4g	1:264747489-264753414	3002	7.99861e-08	-4.89866	3.11313e-05
ENSRNOG00000006655.7	Plrg1	2:182053448-182056734	697	8.19436e-08	-4.48502	3.17415e-05
ENSRNOG00000008578.8	Cdk16	X:1707285-1708840	1475	8.22953e-08	-10.8773	3.17415e-05
ENSRNOG00000019977.7	Ptprf	5:137036653-137038822	2169	9.60023e-08	-3.6725	3.66977e-05
ENSRNOG00000029333.4	Echdc2	5:127776166-127789580	1065	9.95201e-08	-5.28572	3.78734e-05
ENSRNOG00000031211.6	Acsm5	1:189246988-189270633	4806	1.00671e-07	-33.3814	3.81417e-05
ENSRNOG00000006067.6	Aifm1	X:135304064-135333833	2020	1.06294e-07	-84.2376	4.00948e-05
ENSRNOG00000015018.7	Pdia3	3:113376904-113400707	1959	1.107e-07	3.26858	4.13922e-05
ENSRNOG00000029549.4	Eci3	17:30620637-30639941	2066	1.14641e-07	-20.463	4.24945e-05
ENSRNOG00000028650.7	Inf2	6:137177563-137180626	855	1.16215e-07	-7.60934	4.27084e-05
ENSRNOG00000053362.1	Gabarapl1	4:163293617-163302880	1814	1.26244e-07	2.94301	4.56109e-05
ENSRNOG00000002393.7	Eprs	13:103331151-103354352	2544	1.37009e-07	-18.0667	4.92923e-05
ENSRNOG00000001030.8	Tsc22d1	15:58655620-58658247	1464	1.48046e-07	-10.8259	5.30403e-05
ENSRNOG00000013004.7	Akr1d1	4:65132607-65143950	2729	1.54172e-07	-29.1354	5.50048e-05
ENSRNOG00000058484.1	Anp32a	AABR07024206.1:5607-8632	432	1.76849e-07	-3.27116	6.23163e-05
ENSRNOG00000013211.4	Chchd3	4:60080516-60132381	913	1.80991e-07	-7.12193	6.35145e-05
ENSRNOG00000002408.6	Rbm47	14:43810115-43839852	4537	1.82068e-07	-34.5258	6.36317e-05
ENSRNOG00000053362.1	Gabarapl1	4:163293609-163302881	1823	1.97708e-07	21.6644	6.88168e-05
ENSRNOG00000032134.4	Uqcrc1	8:117687529-117691143	1280	2.23969e-07	-3.83561	7.67104e-05
ENSRNOG00000003809.7	Sat1	X:43626479-43629780	2610	2.30492e-07	4.87836	7.86299e-05
ENSRNOG00000058780.1	Igfbp1	14:87448491-87454921	6430	2.37754e-07	9.19016	7.99506e-05
ENSRNOG00000006663.8	Usp2	8:48421786-48432526	3169	2.47917e-07	-11.6424	8.22797e-05
ENSRNOG00000002839.6	Slc19a2	13:82552549-82566610	5817	2.56295e-07	11.0741	8.47316e-05
ENSRNOG00000058340.1	Krt79	7:143528202-143529084	689	2.59626e-07	-10.1957	8.52405e-05
ENSRNOG00000006947.7	Pdhx	3:92909187-92918874	1700	2.60536e-07	-8.62783	8.52405e-05
ENSRNOG00000014448.8	Arntl	1:178039027-178137468	2851	2.6082e-07	8.23608	8.52405e-05
ENSRNOG00000021318.6	Epas1	6:10384730-10387268	2538	2.64049e-07	-3.62143	8.56419e-05
ENSRNOG00000019422.4	Egr1	18:27658556-27661384	2828	2.86327e-07	-23.8005	9.25171e-05
ENSRNOG00000007235.5	Atp5mc1	10:83895938-83896997	477	2.87816e-07	-2.84507	9.26486e-05
ENSRNOG00000011849.6	Ndufs1	9:69919544-69928933	1283	2.90028e-07	-2.39017	9.3011e-05
ENSRNOG00000020544.5	Sdr39u1	15:34561477-34565300	3823	3.04386e-07	3.80955	9.61746e-05
ENSRNOG00000001316.7	Anapc5	12:39241883-39242915	887	3.05734e-07	-43.1484	9.62454e-05
ENSRNOG00000015591.5	Cndp2	18:81521958-81523694	909	3.35269e-07	-23.2178	0.000104773
ENSRNOG00000015380.6	Jup	10:88279631-88284316	2168	3.36866e-07	-10.3535	0.000104889
ENSRNOG00000012274.8	Ddi2	5:160230952-160282877	9593	3.48709e-07	4.39173	0.000107793
ENSRNOG00000052651.1	LOC102556085	3:114650595-114651821	212	3.63665e-07	9.56429	0.00011161
ENSRNOG00000018168.7	Klc4	9:16656467-16661464	1010	3.98228e-07	-3.07688	0.00012049
ENSRNOG00000009088.7	Txnrd1	7:26946117-26984400	3440	4.04859e-07	4.26889	0.000122065
ENSRNOG00000005302.7	Slc2a9	14:77190544-77192699	2155	4.13737e-07	-9.91659	0.000124304
ENSRNOG00000007793.6	Pnrc1	5:48501381-48504813	2005	4.22199e-07	3.98412	0.000126403
ENSRNOG00000000903.7	Asl	12:30173101-30178832	1994	4.33891e-07	5.17256	0.000129451
ENSRNOG00000011971.8	C1s	4:157143042-157145208	2166	4.35772e-07	-10.7496	0.000129561
ENSRNOG00000020704.5	Tkfc	1:226642711-226656410	3814	4.50184e-07	-3.91803	0.00013297
ENSRNOG00000033573.5	Sgk2	3:159374143-159387562	3435	4.64791e-07	-48.2624	0.00013583
ENSRNOG00000011157.6	Jak1	5:119981863-119987040	2494	4.73205e-07	-6.00149	0.000137819
ENSRNOG00000008564.5	Tmem222	5:151461954-151473760	1443	4.9164e-07	-18.6047	0.000141741
ENSRNOG00000006622.6	Cry1	7:24623465-24634099	896	4.94733e-07	-20.0835	0.000142154
ENSRNOG00000013195.6	Ruvbl1	4:120436730-120447458	734	4.97836e-07	-6.10042	0.000142568
ENSRNOG00000009960.8	Puf60	7:117129242-117129721	479	5.0143e-07	-4.68922	0.000142643
ENSRNOG00000011599.7	Gldc	1:248297326-248299766	964	5.14063e-07	-2.67976	0.000145271
ENSRNOG00000012929.6	Wsb1	10:66586906-66603151	3904	5.3007e-07	4.71684	0.000149302
ENSRNOG00000000164.4	Lamp2	X:124730297-124766084	3547	5.66992e-07	2.91521	0.000159178
ENSRNOG00000033498.4	Cib1	1:142014942-142020525	894	5.8269e-07	-4.17853	0.000162519
ENSRNOG00000018237.4	Gstp1	1:219291661-219294147	786	6.93818e-07	-15.8297	0.0001911
ENSRNOG00000016991.5	Arl2bp	19:10753432-10757910	2018	6.94091e-07	-14.2252	0.0001911
ENSRNOG00000020659.5	Mrpl4	8:22025546-22027236	979	7.86311e-07	-3.53489	0.000214526
ENSRNOG00000017689.7	Itih3	16:6992055-7007287	3260	7.86689e-07	4.88158	0.000214526
ENSRNOG00000010643.7	Kank2	8:22791998-22818604	4815	8.54444e-07	-7.08848	0.000230071
ENSRNOG00000049604.2	Mvk	12:47904168-47908681	970	9.25586e-07	-2.53231	0.000246898
ENSRNOG00000001211.4	Gatd3a	20:11249728-11252479	874	9.55044e-07	-4.45535	0.000253965
ENSRNOG00000008812.6	Tmem214	6:26866293-26868852	2390	1.09478e-06	-52.214	0.000288436
ENSRNOG00000003147.8	Sqstm1	10:35704708-35709338	4630	1.11187e-06	4.66803	0.000291653
ENSRNOG00000005602.5	Mthfd1	6:99340121-99351658	2166	1.1138e-06	-4.30099	0.000291653
ENSRNOG00000021317.5	Cct2	7:60109973-60112162	616	1.14802e-06	-6.68924	0.000298784
ENSRNOG00000000165.8	Pfkfb1	X:23092098-23092651	553	1.18196e-06	-10.6132	0.000305759
ENSRNOG00000004466.4	Fam210b	3:170361146-170364270	2977	1.20083e-06	-2.73355	0.000309705
ENSRNOG00000001314.7	Fam20c	12:17913766-17916899	1079	1.21562e-06	-5.70986	0.000312166
ENSRNOG00000014525.5	Hspd1	9:61680524-61681129	605	1.21766e-06	-2.44291	0.000312166
ENSRNOG00000008857.7	Adamts10	7:18436099-18439012	1161	1.23387e-06	-18.6613	0.000315378
ENSRNOG00000016769.5	Rab38	1:152152427-152153452	1025	1.24968e-06	-12.6938	0.000318468
ENSRNOG00000001239.6	Ddt	20:13824501-13832191	5828	1.28195e-06	-3.53537	0.000324758
ENSRNOG00000004100.5	Trib1	7:99957273-99962641	2842	1.29451e-06	-4.87557	0.000326973
ENSRNOG00000045637.1	Rnf14	18:31467111-31468860	1749	1.30458e-06	-10.3435	0.000328547
ENSRNOG00000010944.6	Hyou1	8:48699861-48711915	4402	1.30912e-06	5.34107	0.000328723
ENSRNOG00000016924.8	Acly	10:88392117-88395102	1940	1.33819e-06	-28.5374	0.000335041
ENSRNOG00000014532.2	Lbp	3:154786195-154813494	2887	1.39277e-06	10.5226	0.000343681
ENSRNOG00000017672.7	Akr1c14	17:69805639-69811095	2143	1.44018e-06	-45.4133	0.000353345
ENSRNOG00000017781.6	Dnajc7	10:88498237-88504935	876	1.4973e-06	-3.26921	0.000365264
ENSRNOG00000002802.3	Cxcl1	14:18743691-18745542	1851	1.51109e-06	11.2221	0.000367582
ENSRNOG00000045738.2	Ak4	5:120250615-120309432	4560	1.55548e-06	-2.73997	0.000376242
ENSRNOG00000011300.8	AABR07031193.1	18:3937560-3941208	826	1.5669e-06	-12.7411	0.000377936
ENSRNOG00000001285.8	Atp2a2	12:39553902-39603327	7372	1.57223e-06	6.67563	0.000378156
ENSRNOG00000019834.6	Hsp90ab1	9:17817720-17823243	2488	1.63223e-06	2.17318	0.000389768
ENSRNOG00000014522.5	Mlycd	19:52045236-52048793	1417	1.63416e-06	-3.98217	0.000389768
ENSRNOG00000030391.4	Ei24	8:39257460-39271238	1027	1.64865e-06	36.9452	0.000392132
ENSRNOG00000048088.2	Mest	4:58057815-58064962	2368	1.69693e-06	6.6218	0.000400492
ENSRNOG00000002358.5	Scpep1	10:76230363-76231286	923	1.73219e-06	-13.6178	0.000404142
ENSRNOG00000015591.5	Cndp2	18:81521958-81535470	2030	1.74473e-06	-5.27345	0.000405205
ENSRNOG00000007744.4	Ehd3	6:25099460-25102967	2946	1.75024e-06	-4.05221	0.000405205
ENSRNOG00000017219.5	Vac14	19:40927006-40936227	994	1.81322e-06	-3.80148	0.000416242
ENSRNOG00000019490.7	Slc20a2	16:74318227-74319817	1590	1.84662e-06	-2.9713	0.00042165
ENSRNOG00000001293.6	Get4	12:17469110-17476717	1833	1.97127e-06	-9.65308	0.000443287
ENSRNOG00000010107.8	AABR07025295.1	16:31866494-31948188	4308	1.97733e-06	8.60152	0.000443287
ENSRNOG00000008933.6	Plbd1	4:170564366-170569689	1025	1.97762e-06	-4.21649	0.000443287
ENSRNOG00000005331.4	Vapb	3:171868282-171869667	1385	2.0085e-06	-3.3496	0.000447495
ENSRNOG00000031173.6	Snd1	4:56157192-56171740	1716	2.01207e-06	-2.07852	0.000447495
ENSRNOG00000060735.1	AABR07053136.1	3:93646377-93649835	2388	2.02454e-06	14.5345	0.000449102
ENSRNOG00000059753.1	Gys2	4:176638625-176646463	828	2.04193e-06	-2.77152	0.000451789
ENSRNOG00000052424.1	RGD1306556	12:49556784-49561043	4259	2.05537e-06	-5.67311	0.00045359
ENSRNOG00000057470.1	Pla2g12a	2:235311652-235327952	1575	2.23814e-06	5.56474	0.000487641
ENSRNOG00000010984.6	Anxa11	16:3867143-3874139	1210	2.27281e-06	-2.16633	0.000492687
ENSRNOG00000009550.7	Sqle	7:99619851-99625874	1726	2.2865e-06	-9.85445	0.000493776
ENSRNOG00000014604.6	Sigmar1	5:58121785-58124682	1673	2.28936e-06	2.85859	0.000493776
ENSRNOG00000005447.5	Ypel2	10:74240729-74298802	5451	2.32317e-06	10.479	0.000497309
ENSRNOG00000018118.6	Atad3a	5:173189583-173202110	1676	2.35857e-06	-4.00029	0.000502626
ENSRNOG00000002342.6	Aldh3a2	10:47525484-47531528	1860	2.35975e-06	-4.89934	0.000502626
ENSRNOG00000004657.6	Sec23a	6:80059301-80061227	1926	2.40217e-06	-3.88974	0.00050913
ENSRNOG00000020793.6	Ruvbl2	1:101413747-101417212	1032	2.41124e-06	-7.96274	0.000509789
ENSRNOG00000017752.6	Mccc2	2:30174976-30181426	714	2.56567e-06	-23.2492	0.000541103
ENSRNOG00000019122.7	Sec16a	3:3856217-3857862	1645	2.66289e-06	-5.56681	0.000557488
ENSRNOG00000009568.6	Hdac1	5:147716660-147717234	574	2.75383e-06	-10.7869	0.000575121
ENSRNOG00000011613.8	Ppip5k2	9:111284041-111286324	2283	2.79659e-06	-6.77437	0.000581788
ENSRNOG00000018322.8	Picalm	1:154455572-154460044	3072	2.79934e-06	-29.4766	0.000581788
ENSRNOG00000060568.1	Ptpn21	6:122656368-122658420	2052	2.827e-06	-6.73114	0.000586113
ENSRNOG00000053362.1	Gabarapl1	4:163297879-163302880	1494	2.8908e-06	-8.52904	0.000596485
ENSRNOG00000028092.2	Cpa2	4:57849893-57868564	1183	2.94403e-06	5.77263	0.000605975
ENSRNOG00000007492.7	Rpn2	3:153434874-153446284	1735	3.22365e-06	-2.05109	0.00065721
ENSRNOG00000037850.4	43892	13:102724252-102731857	555	3.39658e-06	-2.02688	0.000689185
ENSRNOG00000008474.7	Acox3	14:80312959-80318880	2529	3.46537e-06	-3.16927	0.00070148
ENSRNOG00000012314.4	Slirp	6:111483702-111491012	1474	3.47547e-06	-6.59112	0.000701865
ENSRNOG00000014291.7	Elp3	15:48942863-49005058	2767	3.48855e-06	-5.56326	0.000702849
ENSRNOG00000005310.6	Cul1	4:77278593-77280251	730	3.50643e-06	-2.7365	0.000704714
ENSRNOG00000025074.6	Fgg	2:181987088-181995329	3019	3.51427e-06	3.47194	0.000704714
ENSRNOG00000038999.4	RT1-A1	20:5417442-5418610	1168	3.57112e-06	8.78996	0.000714442
ENSRNOG00000061883.1	Aqp9	8:77559273-77563283	1139	3.67952e-06	-14.8245	0.000734411
ENSRNOG00000012693.5	Pmpcb	4:9908552-9912619	1102	3.72377e-06	-32.3243	0.000741515
ENSRNOG00000007060.5	Plin2	5:104996433-105009565	2334	3.82359e-06	-6.49232	0.000757867
ENSRNOG00000016190.6	Coq9	19:10583851-10584841	990	3.91649e-06	-7.43217	0.000772704
ENSRNOG00000012084.5	Xpnpep1	1:273708106-273717524	1197	4.09671e-06	-2.83718	0.000799978
ENSRNOG00000042237.3	Tm6sf2	16:21092307-21096528	1238	4.10144e-06	-2.63864	0.000799978
ENSRNOG00000059330.1	AABR07004549.1	1:147420485-147424872	4387	4.12102e-06	3.84534	0.000801969
ENSRNOG00000051170.2	Ddx17	7:120762255-120780641	6885	4.19069e-06	12.8031	0.000811008
ENSRNOG00000028668.6	Slc28a2	3:114646490-114647374	884	4.24406e-06	-32.0311	0.000818472
ENSRNOG00000032878.3	Cxxc5	18:28637325-28656937	2200	4.37903e-06	-13.258	0.000841205
ENSRNOG00000012325.5	Adk	15:3033109-3094131	1391	4.38158e-06	-6.79578	0.000841205
ENSRNOG00000008615.4	Mal2	7:94159193-94163652	2322	4.43338e-06	-5.47502	0.000849245
ENSRNOG00000014429.5	Arfgap2	3:80090051-80094263	2475	4.52087e-06	-10.7447	0.000863179
ENSRNOG00000000799.7	Abcf1	20:3321253-3322829	1163	4.52628e-06	-3.1354	0.000863179
ENSRNOG00000022268.6	Pnpla3	7:125034766-125038420	862	4.55145e-06	-9.23547	0.00086605
ENSRNOG00000020060.4	Atf5	1:100808240-100811969	1367	4.65944e-06	5.07602	0.000880726
ENSRNOG00000006523.7	Atl2	6:2568964-2611470	7684	4.72307e-06	18.0797	0.00088593
ENSRNOG00000024848.7	Fga	2:182006167-182017381	8041	4.75159e-06	4.0255	0.00088834
ENSRNOG00000009333.7	Osgep	15:27842421-27843647	584	4.78611e-06	-17.947	0.000892843
ENSRNOG00000028616.6	Pck1	3:171213914-171219887	3414	4.86207e-06	4.64958	0.000901124
ENSRNOG00000007457.4	Serping1	3:72160928-72170761	2329	4.98591e-06	3.51101	0.000914578
ENSRNOG00000039745.4	Pm20d1	13:48584390-48598079	4314	4.99658e-06	-18.7451	0.000914578
ENSRNOG00000002251.8	Sec31a	14:10904093-10909612	1288	4.99875e-06	-3.09287	0.000914578
ENSRNOG00000028668.6	Slc28a2	3:114371508-114379588	1058	5.19332e-06	2.99218	0.000944127
ENSRNOG00000020194.7	Hes6	9:98549692-98551426	1416	5.20461e-06	-5.09215	0.000944173
ENSRNOG00000000158.5	Cdo1	18:40701947-40717153	7020	5.26723e-06	4.84974	0.000950863
ENSRNOG00000019027.6	Habp4	17:1691810-1702381	1553	5.29701e-06	-12.547	0.000952861
ENSRNOG00000008411.6	Sec23b	3:138742619-138757111	1073	5.31775e-06	-4.4592	0.000954137
ENSRNOG00000031092.6	Rock1	18:1273388-1281013	2492	5.43147e-06	19.7902	0.000970929
ENSRNOG00000000798.6	Gnl1	20:3290533-3291344	547	5.44947e-06	-22.3873	0.000972117
ENSRNOG00000012999.7	Phb2	4:157234848-157235381	533	5.70812e-06	-2.78864	0.00101461
ENSRNOG00000004301.6	Dcaf13	7:78036362-78040296	618	5.71135e-06	-5.70582	0.00101461
ENSRNOG00000019772.5	Dnpep	9:82505468-82510231	789	5.73287e-06	-39.8181	0.00101632
ENSRNOG00000018456.7	LOC100911664	17:42266651-42269165	2514	5.90107e-06	4.66419	0.00104182
ENSRNOG00000012087.6	Ufsp2	16:49465946-49471610	826	5.94257e-06	-3.87831	0.00104699
ENSRNOG00000017777.3	Ahcy	3:150586601-150593642	2939	6.06739e-06	-7.10516	0.0010646
ENSRNOG00000005257.7	Prkaca	19:25109798-25119005	1929	6.40049e-06	-7.45498	0.00111847
ENSRNOG00000046874.2	Snx9	1:46821251-46827313	1844	6.45188e-06	-4.12333	0.00112507
ENSRNOG00000014294.7	Ptpn6	4:157239131-157240627	778	6.46786e-06	-3.97398	0.00112507
ENSRNOG00000008825.6	Ssrp1	3:72455678-72457649	1133	6.47772e-06	-3.30907	0.00112507
ENSRNOG00000047179.3	Aplp2	8:32298524-32328839	3458	6.64321e-06	3.39021	0.00114915
ENSRNOG00000014915.6	Gsr	16:62196145-62215559	3024	6.76289e-06	-4.17131	0.0011675
ENSRNOG00000015519.6	Ces1d	19:15207091-15239821	1694	6.79928e-06	-5.92277	0.00116907
ENSRNOG00000018568.6	Rab5c	10:88621923-88623613	1256	6.90911e-06	-6.68959	0.0011836
ENSRNOG00000018899.8	C5	3:14049987-14112852	4413	6.91144e-06	2.86838	0.0011836
ENSRNOG00000032487.4	Sts	X:45423659-45428786	1741	7.05627e-06	-14.6453	0.00120599
ENSRNOG00000042233.3	Rpl41	7:2972891-2973428	537	7.09559e-06	-2.60561	0.00121029
ENSRNOG00000019069.4	Nxf1	1:224957500-224970727	4029	7.36637e-06	2.60325	0.00124901
ENSRNOG00000013746.6	Senp3	10:56277605-56279059	790	7.42414e-06	-6.25759	0.00125632
ENSRNOG00000005082.5	Irf6	13:111870118-111889366	4084	7.69996e-06	3.47456	0.00129787
ENSRNOG00000013409.4	Gclm	2:225847040-225852453	5413	7.96425e-06	-8.71816	0.00133497
ENSRNOG00000000068.5	Ppp2r5a	13:110038997-110078437	1432	7.96688e-06	4.1519	0.00133497
ENSRNOG00000008837.6	Ass1	3:10327219-10346760	1007	8.04631e-06	-4.24012	0.00134565
ENSRNOG00000028629.3	Akt1	6:137218375-137221353	1162	8.24151e-06	-5.44345	0.00137561
ENSRNOG00000013751.6	Plpbp	16:69163576-69165784	1440	8.30073e-06	-3.54166	0.00138011
ENSRNOG00000021492.4	Rbbp4	5:147534508-147535349	280	8.65272e-06	33.5736	0.00143307
ENSRNOG00000033318.4	Rfxank	16:21036528-21037080	552	9.17359e-06	-35.8599	0.00151257
ENSRNOG00000004060.7	Calm1	6:124217045-124219949	343	9.22918e-06	-124.642	0.00151681
ENSRNOG00000012862.5	Spsb4	8:104840937-104892529	2232	9.28966e-06	-5.51005	0.00151806
ENSRNOG00000056550.1	Epb41l4b	5:74104549-74106346	1797	9.30769e-06	-6.65272	0.00151806
ENSRNOG00000032327.4	Pdia5	11:68554384-68579004	6539	9.34096e-06	6.33208	0.00151979
ENSRNOG00000014204.7	Pacsin3	3:80072477-80081080	1851	9.35378e-06	-3.46071	0.00151979
ENSRNOG00000003958.7	Commd10	18:41153343-41154988	965	9.53215e-06	-4.56511	0.00154583
ENSRNOG00000001404.7	Agfg2	12:22111326-22118578	1996	9.58014e-06	-5.94841	0.00155068
ENSRNOG00000049531.2	Usp19	8:117288054-117292061	2038	9.67196e-06	-5.96105	0.00156259
ENSRNOG00000043503.2	Ehd1	1:221665131-221667369	2238	9.74883e-06	-11.6235	0.00157204
ENSRNOG00000004280.4	Tcn2	14:84173978-84179836	1103	9.90083e-06	-5.89907	0.00158803
ENSRNOG00000025768.6	Clk1	9:65296718-65306162	3119	9.90364e-06	3.60029	0.00158803
ENSRNOG00000011282.6	Ppp2r1a	1:60730890-60737507	2037	1.01073e-05	-12.4458	0.00161766
ENSRNOG00000022173.5	Gatad2a	16:21262801-21268504	3537	1.03033e-05	-12.3993	0.00164595
ENSRNOG00000004834.5	Llgl2	10:104395603-104403727	3014	1.04249e-05	-29.4764	0.00165918
ENSRNOG00000006989.7	Vamp2	10:55675515-55679450	2236	1.06693e-05	-8.73676	0.0016918
ENSRNOG00000007139.2	Ttpa	5:34011087-34023671	12584	1.07212e-05	8.46883	0.00169483
ENSRNOG00000017106.6	Csnk1a1	18:56902506-56921160	4253	1.0779e-05	-5.36953	0.00169901
ENSRNOG00000019164.7	Uba1	X:1723098-1726548	1303	1.07942e-05	-2.56487	0.00169901
ENSRNOG00000021405.6	Cyp2c7	1:148099744-148119980	804	1.10355e-05	6.40029	0.00173381
ENSRNOG00000010727.7	Ube2r2	5:57471931-57506477	822	1.11341e-05	5.32131	0.0017461
ENSRNOG00000019918.3	Coasy	10:88995544-88996681	752	1.11973e-05	-3.63425	0.0017528
ENSRNOG00000019383.7	Tef	7:123052744-123058607	3816	1.12601e-05	-11.1348	0.00175941
ENSRNOG00000057832.1	Rnf125	18:15225148-15225814	666	1.13582e-05	8.41477	0.00177151
ENSRNOG00000002794.5	Selp	13:82464975-82466485	1510	1.14059e-05	12.0447	0.00177249
ENSRNOG00000001083.7	Kdelr2	12:13192450-13196063	1503	1.14851e-05	-6.64468	0.00177514
ENSRNOG00000020259.7	RGD1305347	5:137359534-137360634	929	1.20637e-05	-3.45682	0.00185452
ENSRNOG00000016016.7	Zmat2	18:29640315-29645219	2408	1.21121e-05	-5.72772	0.00185863
ENSRNOG00000038436.4	RGD1307100	2:123762118-123767070	1409	1.23256e-05	-27.0946	0.001888
ENSRNOG00000061213.1	Mrps36	2:30740408-30748428	1157	1.23766e-05	-2.23683	0.00189242
ENSRNOG00000013516.6	Sf3b1	9:61593399-61634510	6174	1.26182e-05	-8.52783	0.00191909
ENSRNOG00000008377.7	Wdtc1	5:151487578-151536715	4337	1.27371e-05	16.2605	0.00193032
ENSRNOG00000012084.5	Xpnpep1	1:273708106-273712669	789	1.29352e-05	-60.7617	0.00195134
ENSRNOG00000016776.5	Extl1	5:152573638-152577278	2159	1.31365e-05	-6.17443	0.00197337
ENSRNOG00000019638.7	Lmna	2:187842883-187863552	3112	1.31779e-05	-3.18907	0.00197613
ENSRNOG00000022576.4	Nudt12	9:105679933-105691194	4517	1.32115e-05	-26.3685	0.00197771
ENSRNOG00000042692.3	AABR07027750.1	17:43473060-43480974	498	1.33517e-05	-5.50619	0.0019952
ENSRNOG00000012247.6	Rab7a	4:119910459-119963080	2059	1.3535e-05	-2.57827	0.00201557
ENSRNOG00000042714.2	RGD1559459	14:22946179-22955671	2531	1.37155e-05	-6.45868	0.00203537
ENSRNOG00000018109.4	Clic4	5:153564568-153625869	5330	1.37834e-05	4.8023	0.0020419
ENSRNOG00000011696.6	Lifr	2:56473897-56489446	4031	1.42931e-05	21.3559	0.00211376
ENSRNOG00000004205.6	Pkdcc	6:6427126-6436975	2386	1.43314e-05	8.99515	0.00211576
ENSRNOG00000058780.1	Igfbp1	14:87448652-87453930	3140	1.45011e-05	4.90297	0.00213482
ENSRNOG00000016265.7	Acsl5	1:276278942-276290015	1395	1.45104e-05	-2.10658	0.00213482
ENSRNOG00000004342.7	Ahr	6:54963986-54972775	4107	1.49252e-05	5.30413	0.0021846
ENSRNOG00000009799.5	Dpagt1	8:48662818-48665188	1614	1.51515e-05	-22.5336	0.00221393
ENSRNOG00000020853.7	Scap	8:118623536-118628651	2582	1.57766e-05	-2.73055	0.00228965
ENSRNOG00000043150.4	Arfgap1	3:176484432-176492682	3709	1.60986e-05	-6.04258	0.00233235
ENSRNOG00000007665.4	Cse1l	3:163701229-163702078	849	1.61254e-05	-6.69773	0.00233235
ENSRNOG00000019915.5	Xrcc1	1:81435060-81441678	1492	1.66612e-05	-5.87998	0.0023977
ENSRNOG00000043503.2	Ehd1	1:221661315-221667369	2830	1.71544e-05	-8.65288	0.00245219
ENSRNOG00000016827.7	Slc38a3	8:116406170-116411057	1818	1.71981e-05	-2.4449	0.00245434
ENSRNOG00000006965.6	Aff4	10:38771257-38774607	2704	1.75189e-05	-3.47218	0.00249182
ENSRNOG00000031387.4	Dazap1	7:12289888-12293930	1330	1.86204e-05	-2.58621	0.00262668
ENSRNOG00000021513.1	Rtn4rl2	3:72272724-72289331	2024	1.8754e-05	-3.44016	0.00264116
ENSRNOG00000033206.4	Entpd5	6:108087417-108093008	3858	1.89492e-05	-3.35262	0.00266427
ENSRNOG00000037188.5	Mug1	4:154547017-154561830	2381	1.92008e-05	136.63	0.00269523
ENSRNOG00000003144.6	Gprc5c	10:103407974-103417364	3463	1.9374e-05	-4.13045	0.00271463
ENSRNOG00000022482.6	Trappc11	16:47914484-47920830	1080	1.9503e-05	-6.05529	0.00272266
ENSRNOG00000000521.4	Cdkn1a	20:6351457-6358864	1933	1.95553e-05	6.41997	0.00272266
ENSRNOG00000037580.2	Psmd8	1:88116782-88119532	977	2.01048e-05	-20.604	0.00279464
ENSRNOG00000005360.8	Dhrs7b	10:47108647-47111232	735	2.0588e-05	-5.52079	0.00284334
ENSRNOG00000015768.4	Nat8f5	4:117524736-117527445	2185	2.10253e-05	-7.41406	0.00289906
ENSRNOG00000008243.7	Slc43a1	3:72256397-72265229	1801	2.13361e-05	-6.15308	0.00292777
ENSRNOG00000037188.5	Mug1	4:154676426-154728854	4498	2.1584e-05	3.74897	0.00295308
ENSRNOG00000020817.5	Cyp2a1	1:83724364-83729809	5445	2.17323e-05	11.8204	0.00296441
ENSRNOG00000034015.3	Capn2	13:100878644-100879730	1086	2.20804e-05	-3.66783	0.00300581
ENSRNOG00000013376.6	Mvd	19:55258904-55262620	1037	2.23628e-05	-17.6473	0.00303942
ENSRNOG00000007088.6	Xpot	7:63688645-63691485	2840	2.26801e-05	-5.62297	0.00307279
ENSRNOG00000010474.7	Hmces	4:119833321-119841006	2188	2.28038e-05	-2.66649	0.00308467
ENSRNOG00000008047.7	Khk	6:26810564-26820959	1444	2.30054e-05	-2.08821	0.00310703
ENSRNOG00000006345.7	Sec61b	5:63192297-63200611	665	2.35063e-05	-2.6134	0.00316969
ENSRNOG00000047781.2	Slc25a23	9:9999269-10003962	2344	2.36546e-05	-2.38294	0.00317474
ENSRNOG00000009630.8	Hsd17b12	3:82924684-82936676	1301	2.36626e-05	-38.1164	0.00317474
ENSRNOG00000014501.6	Zfp638	4:115683302-115685484	513	2.36894e-05	-9.13084	0.00317474
ENSRNOG00000016955.5	Mindy3	17:79720533-79761183	1345	2.41504e-05	-6.31246	0.0032311
ENSRNOG00000008074.6	Cyp11a1	8:62798285-62802999	879	2.42227e-05	24.0087	0.00323571
ENSRNOG00000017473.6	Ttc25	10:88468635-88488311	1318	2.46146e-05	-8.6355	0.00327783
ENSRNOG00000007081.6	Xdh	6:25147923-25158208	2684	2.53608e-05	-4.81893	0.00336673
ENSRNOG00000037911.2	LOC680227	X:74333682-74341522	4394	2.54391e-05	8.01926	0.0033719
ENSRNOG00000020506.6	Khnyn	15:34551577-34561727	2272	2.58171e-05	8.29459	0.00341671
ENSRNOG00000004659.5	Creld2	7:129812716-129819643	1246	2.60258e-05	2.62607	0.00343902
ENSRNOG00000006611.7	Nostrin	3:55399532-55433902	1283	2.61996e-05	-4.76883	0.00345224
ENSRNOG00000007422.6	Vav2	3:5811382-5813754	2372	2.6302e-05	-10.3493	0.00345224
ENSRNOG00000001269.6	Ppp1cc	12:39864300-39865697	1397	2.63349e-05	-7.95107	0.00345224
ENSRNOG00000013963.7	Il6st	2:44278549-44320091	9027	2.66572e-05	27.6329	0.00347949
ENSRNOG00000002783.8	Serpinc1	13:78818001-78820379	331	2.70918e-05	-11.7338	0.00351479
ENSRNOG00000055721.1	Rnf128	X:110818636-110878280	3033	2.73239e-05	5.58081	0.00353954
ENSRNOG00000013954.5	Alpl	5:156086491-156105953	2353	2.7559e-05	-14.6409	0.00356461
ENSRNOG00000007781.6	Stau1	3:163702589-163705659	2278	2.76499e-05	-4.22483	0.00357097
ENSRNOG00000042261.3	Hdgf	2:187282997-187284671	1674	2.80782e-05	-2.08605	0.00361537
ENSRNOG00000013552.6	Scd	1:264155451-264172879	9302	2.89138e-05	-4.32695	0.00369653
ENSRNOG00000010537.6	Dis3l	8:69771191-69772739	769	2.89244e-05	-3.37072	0.00369653
ENSRNOG00000015654.8	Ghr	2:53413369-53414030	661	2.94221e-05	2.26208	0.00375454
ENSRNOG00000005825.8	Lyz2	7:60335966-60336795	829	2.95621e-05	-5.5605	0.00376119
ENSRNOG00000046345.2	Rpn1	4:120009593-120018717	1544	2.97659e-05	-2.26026	0.0037815
ENSRNOG00000007990.5	Adipor2	4:151410862-151448803	5547	2.9901e-05	6.03693	0.00379305
ENSRNOG00000004061.5	Pnn	6:80165602-80168484	2882	3.02541e-05	-16.6955	0.0038265
ENSRNOG00000006305.5	Slc38a2	7:138088648-138093930	3421	3.12105e-05	3.64764	0.00393005
ENSRNOG00000019630.7	Hacl1	16:7734891-7758452	4809	3.1931e-05	-8.24725	0.00400898
ENSRNOG00000015139.7	F12	17:9736576-9745747	3615	3.25157e-05	24.9976	0.00406451
ENSRNOG00000020430.6	Wdr11	1:202813892-202816338	1063	3.31694e-05	-3.51791	0.00413415
ENSRNOG00000019772.5	Dnpep	9:82505527-82514399	1649	3.33774e-05	-3.21996	0.00415403
ENSRNOG00000016653.4	Ngef	9:94569284-94570289	1005	3.38067e-05	-7.34286	0.00420136
ENSRNOG00000008065.7	Wwc1	10:20662994-20663950	956	3.40332e-05	-7.42537	0.00422337
ENSRNOG00000012458.7	Cyp2e1	1:213520032-213522355	1059	3.46141e-05	-6.84757	0.00428305
ENSRNOG00000007784.7	Bloc1s1	7:3342628-3346259	570	3.56522e-05	-62.4311	0.00440513
ENSRNOG00000000186.7	Tst	7:119616168-119616790	622	3.59124e-05	-4.80987	0.00443089
ENSRNOG00000008214.5	Fbxo9	8:85388329-85392613	841	3.64639e-05	-3.76643	0.00448601
ENSRNOG00000015035.7	Myo7b	18:24780537-24781681	1144	3.67474e-05	-5.19565	0.00450484
ENSRNOG00000029360.5	Serinc1	20:38965714-38985104	3084	3.70782e-05	2.40848	0.00453551
ENSRNOG00000055853.1	Gorasp2	3:56994494-56995431	937	3.73759e-05	-4.60913	0.00456541
ENSRNOG00000006965.6	Aff4	10:38773997-38774572	411	3.77414e-05	-25.2115	0.0046018
ENSRNOG00000015206.6	Alad	5:78368790-78379346	1454	3.77813e-05	-2.49088	0.0046018
ENSRNOG00000039494.4	Aass	4:50184252-50209038	1100	3.82169e-05	2.93996	0.00464165
ENSRNOG00000020879.5	Nags	10:90086298-90089693	1880	3.86683e-05	-2.8255	0.00466997
ENSRNOG00000008393.8	Tax1bp1	4:82820157-82832862	1486	3.88202e-05	-3.76067	0.00468172
ENSRNOG00000034116.6	Gk	X:54227021-54259074	3683	3.91414e-05	5.92799	0.00471382
ENSRNOG00000014565.4	Lcmt1	1:193383841-193391638	539	4.04158e-05	-3.94083	0.00484683
ENSRNOG00000012794.8	Grhpr	5:60528992-60538419	2608	4.13242e-05	2.94804	0.00494885
ENSRNOG00000025940.3	Mettl9	1:190990711-191009933	1047	4.14916e-05	-19.3245	0.00495504
ENSRNOG00000018336.6	Eps8l2	1:214345410-214348572	1597	4.20496e-05	6.53685	0.00501468
ENSRNOG00000020144.5	RGD1310127	1:199687725-199689223	1498	4.26142e-05	-27.9515	0.00506086
ENSRNOG00000015914.7	U2af2	1:72312251-72321896	1705	4.31061e-05	-3.9099	0.00509807
ENSRNOG00000032669.5	Serpina1	6:127613743-127620450	1113	4.43855e-05	3.64463	0.00523492
ENSRNOG00000003289.8	Lap3	14:70102549-70116882	2044	4.61085e-05	-22.1234	0.00541575
ENSRNOG00000020271.5	Tial1	1:199844113-199865833	2970	4.65957e-05	6.463	0.00546549
ENSRNOG00000004294.5	Ascl1	7:28037557-28040510	2613	4.70749e-05	-4.32733	0.00548156
ENSRNOG00000014532.2	Lbp	3:154800453-154813551	3458	4.71169e-05	15.037	0.00548156
ENSRNOG00000010218.7	Eif5	6:136003077-136004727	664	4.80547e-05	10.0564	0.00557552
ENSRNOG00000007699.5	Golga5	6:126372537-126378732	1152	4.86152e-05	-7.25989	0.00563292
ENSRNOG00000004813.5	Rtcb	7:23927144-23933195	701	4.87089e-05	-4.5889	0.00563615
ENSRNOG00000008891.5	Ift20	10:65805827-65812409	1984	4.90402e-05	-2.21022	0.00566682
ENSRNOG00000013791.5	Enpp3	1:21669515-21684609	1154	4.9345e-05	-4.78099	0.00569436
ENSRNOG00000000068.5	Ppp2r5a	13:110032751-110034640	1889	5.00832e-05	-5.0455	0.00575651
ENSRNOG00000028092.2	Cpa2	4:57849893-57879764	1894	5.04838e-05	4.90651	0.00579454
ENSRNOG00000000893.6	Tmem248	12:29931730-29942766	3141	5.12842e-05	28.8724	0.00585889
ENSRNOG00000046112.2	Dedd2	1:82072543-82088990	2310	5.13355e-05	4.54891	0.00585889
ENSRNOG00000009965.5	Pih1d2	8:55055003-55063371	5298	5.27355e-05	-4.774	0.00600469
ENSRNOG00000010633.3	Acsl1	16:48966265-49003946	640	5.28372e-05	2.26028	0.00600518
ENSRNOG00000019626.4	Slc27a5	1:65582448-65587733	1861	5.2962e-05	-27.6627	0.00600653
ENSRNOG00000018255.6	Clptm1	1:80548344-80551627	2046	5.36356e-05	-69.7823	0.00606685
ENSRNOG00000048723.1	Pros1	7:1206522-1288142	3375	5.4092e-05	3.28868	0.00610235
ENSRNOG00000019458.7	Shpk	10:59787805-59789679	1874	5.45654e-05	-3.63546	0.00614765
ENSRNOG00000032327.4	Pdia5	11:68547243-68579004	885	5.47607e-05	-3.7997	0.00616155
ENSRNOG00000060087.1	Adra1b	10:29392758-29394110	1352	5.63539e-05	-3.19971	0.00630931
ENSRNOG00000018279.7	Sfxn1	17:11045768-11047816	2048	5.69105e-05	-3.06637	0.00634086
ENSRNOG00000011728.6	Fto	19:16772745-16775419	2674	5.69468e-05	-7.23239	0.00634086
ENSRNOG00000046643.2	Cyp3a9	12:19099282-19114519	871	5.71563e-05	3.47812	0.00635593
ENSRNOG00000001135.6	Wsb2	12:44941575-44942920	1345	5.72977e-05	-5.82165	0.00636088
ENSRNOG00000053518.1	Zscan26	17:45203660-45207593	3933	5.73494e-05	-25.922	0.00636088
ENSRNOG00000001823.8	St6gal1	11:80927598-80981423	3882	5.75526e-05	3.23465	0.00637516
ENSRNOG00000019772.5	Dnpep	9:82505468-82514399	2122	5.79556e-05	7.47731	0.00640323
ENSRNOG00000000796.8	Ranbp2	20:28073958-28077349	2753	5.84376e-05	-6.14015	0.00644817
ENSRNOG00000021438.3	Tuba1c	7:140723518-140724449	931	5.9089e-05	-7.69369	0.00649798
ENSRNOG00000015441.7	Il4r	1:196964349-196967221	2543	5.9329e-05	-2.08473	0.00649798
ENSRNOG00000029698.5	Pim3	7:129860268-129863450	1769	5.9386e-05	2.83867	0.00649798
ENSRNOG00000046171.3	AABR07035839.1	12:24605877-24620306	1699	5.94202e-05	3.94397	0.00649798
ENSRNOG00000001333.6	Azgp1	12:19195223-19206357	8254	6.00287e-05	3.20609	0.00654779
ENSRNOG00000003075.6	Tmem39a	11:64723128-64729016	1005	6.04924e-05	-9.84323	0.00658097
ENSRNOG00000042086.3	Rab26	10:13893427-13893942	310	6.05635e-05	-4.11494	0.00658097
ENSRNOG00000019423.5	Dvl1	5:173304626-173308020	2026	6.12553e-05	-2.33581	0.00663091
ENSRNOG00000008798.7	Pipox	10:64962545-64964863	1203	6.19519e-05	-10.1504	0.00668097
ENSRNOG00000019383.7	Tef	7:123034038-123058607	4157	6.22523e-05	-22.013	0.00669051
ENSRNOG00000003620.5	Fmo3	13:80837789-80856144	2686	6.22825e-05	6.56076	0.00669051
ENSRNOG00000007990.5	Adipor2	4:151410862-151415186	4324	6.25455e-05	-2.11845	0.00669245
ENSRNOG00000026420.5	Iqcg	11:71005169-71008579	1466	6.5076e-05	-2.96116	0.00693648
ENSRNOG00000008243.7	Slc43a1	3:72260271-72265229	1569	6.51312e-05	-11.3303	0.00693648
ENSRNOG00000006139.7	Stx18	14:77402952-77407846	814	6.57255e-05	-5.318	0.00698239
ENSRNOG00000005504.8	Pkp4	3:45277346-45414613	4288	6.64011e-05	4.69838	0.00703671
ENSRNOG00000033573.5	Sgk2	3:159361453-159387562	4285	6.67766e-05	-5.42284	0.00705903
ENSRNOG00000008474.7	Acox3	14:80312959-80338281	3542	6.69039e-05	3.18009	0.00706377
ENSRNOG00000029028.5	Mknk2	7:11916754-11920114	3133	6.74332e-05	-15.6967	0.00710213
ENSRNOG00000027784.4	Tsku	1:163317145-163328704	2739	6.82381e-05	-3.39732	0.00716927
ENSRNOG00000013790.5	Mfsd1	2:164747639-164768581	3109	6.88239e-05	29.4064	0.00722196
ENSRNOG00000006985.7	Ccnk	6:132109453-132113646	1478	6.8987e-05	-5.60244	0.0072302
ENSRNOG00000023130.6	Lyplal1	13:104049281-104051037	1107	6.95035e-05	-5.53249	0.00725769
ENSRNOG00000020440.6	Fads2	1:226131552-226133195	1643	7.00566e-05	-2.74088	0.00729423
ENSRNOG00000008245.7	AABR07054614.1	3:163950054-163954772	1315	7.0157e-05	-18.0879	0.00729423
ENSRNOG00000019456.6	Kars	19:44212146-44231186	2050	7.01941e-05	21.4023	0.00729423
ENSRNOG00000018494.6	Ppp1r3c	1:255371809-255376839	2777	7.03368e-05	4.17691	0.00730019
ENSRNOG00000018413.7	Per3	5:168085987-168106118	4518	7.05335e-05	-15.7691	0.00731174
ENSRNOG00000025269.6	Slc25a44	2:187772011-187774777	2766	7.09671e-05	-3.54637	0.00733953
ENSRNOG00000005766.6	Tbc1d20	3:147772084-147790947	3323	7.0973e-05	23.9712	0.00733953
ENSRNOG00000053769.1	Soat2	7:143763520-143767993	1097	7.14166e-05	-3.85457	0.00736978
ENSRNOG00000013443.8	Tm9sf3	1:260464928-260518007	6398	7.14376e-05	2.52255	0.00736978
ENSRNOG00000061216.1	Tubb5	20:3422427-3426429	2247	7.20152e-05	25.9997	0.00741639
ENSRNOG00000013251.7	Trim24	4:65648817-65664386	6695	7.31438e-05	-8.10684	0.00750061
ENSRNOG00000014765.6	Vapa	9:113300810-113303265	1123	7.36802e-05	-4.9784	0.00754658
ENSRNOG00000027860.6	Ggnbp2	10:72156513-72160190	1458	7.42912e-05	-3.31303	0.00758196
ENSRNOG00000018194.7	Srrm1	5:153675589-153676601	1012	7.53783e-05	-2.90399	0.00767461
ENSRNOG00000020130.7	Arhgef1	1:81794123-81797476	1394	7.57166e-05	-4.44721	0.00769076
ENSRNOG00000020373.7	Dap3	2:188225614-188245736	1564	7.58704e-05	-3.06646	0.00769725
ENSRNOG00000018287.6	RGD1307603	1:219307517-219312084	3308	7.72206e-05	2.84952	0.00781571
ENSRNOG00000010083.5	Prpsap1	10:105430517-105452261	1730	7.78857e-05	3.92795	0.00787372
ENSRNOG00000019299.5	Edem2	3:151232498-151252089	1813	7.81574e-05	-6.06945	0.00789167
ENSRNOG00000042692.3	AABR07027750.1	17:43492534-43498343	2308	7.82807e-05	7.27217	0.00789167
ENSRNOG00000002642.7	Ptges3	7:2479268-2490596	619	7.87643e-05	5.08727	0.00792512
ENSRNOG00000016957.5	Igfbp2	9:80117639-80144804	958	8.03382e-05	-6.68983	0.00805724
ENSRNOG00000060438.1	AABR07001634.1	1:54432346-54433690	1344	8.03597e-05	-3.69506	0.00805724
ENSRNOG00000019090.6	Cct3	2:187692635-187693610	667	8.04881e-05	-5.8229	0.00805791
ENSRNOG00000020020.6	Wbp1l	1:266358715-266415493	4118	8.05547e-05	7.54412	0.00805791
ENSRNOG00000001050.8	Eif2ak1	12:12748784-12754429	1039	8.22855e-05	-7.65339	0.00821186
ENSRNOG00000007091.8	Ly6e	7:116358249-116359866	1119	8.59897e-05	-8.07679	0.00855163
ENSRNOG00000013545.7	Polr2e	7:12536336-12536792	456	8.62992e-05	-14.9267	0.00856557
ENSRNOG00000024470.5	Lman1	18:61683371-61697353	2860	8.79242e-05	-6.78285	0.00871366
ENSRNOG00000001415.6	Ap1s1	12:22665111-22676079	1348	8.8749e-05	-3.03545	0.00878522
ENSRNOG00000009015.7	Nfx1	5:57291155-57334504	4409	8.89529e-05	3.38748	0.00879525
ENSRNOG00000000665.7	Pitpnb	12:51313630-51341738	364	8.92535e-05	34.2342	0.00881479
ENSRNOG00000009015.7	Nfx1	5:57309776-57334504	3704	8.93739e-05	-7.52816	0.00881651
ENSRNOG00000005257.7	Prkaca	19:25094997-25119005	2456	9.09779e-05	3.08839	0.00892978
ENSRNOG00000013387.8	Tpcn2	1:218418887-218423770	1626	9.115e-05	-7.98583	0.00892999
ENSRNOG00000002794.5	Selp	13:82464120-82464840	720	9.17972e-05	7.45859	0.00897636
ENSRNOG00000016271.5	Itm2b	15:55254663-55277755	1839	9.39559e-05	2.12164	0.00914213
ENSRNOG00000004147.7	Abca8a	10:98318628-98326102	2351	9.40802e-05	-2.12584	0.00914382
ENSRNOG00000024278.4	Rbm42	1:89099251-89104498	989	9.51086e-05	-7.58272	0.00922284
ENSRNOG00000020194.7	Hes6	9:98549692-98551431	1444	9.5882e-05	-3.55196	0.00927682
ENSRNOG00000005513.7	Srsf5	6:104611013-104615303	2294	9.59915e-05	-3.18394	0.00927694
ENSRNOG00000020952.8	Cgn	2:195909625-195913186	2117	9.79746e-05	-3.38084	0.00944726
ENSRNOG00000060775.1	Lmo7	15:86449318-86458511	1497	9.85575e-05	-3.88704	0.00949278
ENSRNOG00000005276.6	Csnk2a1	3:147757373-147760386	3013	9.89494e-05	-2.88508	0.00949365
ENSRNOG00000016751.5	Slc25a28	1:263419981-263421099	1118	9.93044e-05	-3.75253	0.00950076
ENSRNOG00000001258.3	Snx8	12:16388073-16389505	1432	9.96328e-05	-12.2375	0.00950195
ENSRNOG00000007457.4	Serping1	3:72160928-72164196	1250	9.97565e-05	-5.39361	0.00950195
ENSRNOG00000027888.6	Cmss1	11:45304067-45330487	976	9.98542e-05	-7.75049	0.00950195
ENSRNOG00000008218.6	Atp6v0e2	4:78168035-78172254	1932	0.000100251	-3.68585	0.00952728
ENSRNOG00000021118.5	Nomo1	1:102067826-102068875	758	0.00010051	-2.60941	0.00953078
ENSRNOG00000001979.7	Rcan1	11:32539685-32550658	5035	0.000102122	5.5527	0.00960911
ENSRNOG00000002818.7	Eftud2	10:90932067-90932547	480	0.000102524	-7.09726	0.00963635
ENSRNOG00000017441.8	Tpm3	2:189439975-189451385	1547	0.00010286	-37.493	0.00965732
ENSRNOG00000008981.7	Pdcd6ip	8:121916184-121921767	3781	0.000103741	-3.13824	0.0097294
ENSRNOG00000047656.2	Gaa	10:108411556-108413059	910	0.000108341	-5.91076	0.0101055
ENSRNOG00000013961.6	Ghitm	16:14369494-14379310	3044	0.00010917	-71.2301	0.0101717
ENSRNOG00000007356.4	Chmp3	4:99474534-99496152	2353	0.000110628	-11.0154	0.0102851
ENSRNOG00000013180.6	Ercc3	18:25055013-25068501	1202	0.000111347	-4.0895	0.0103407
ENSRNOG00000025406.6	Iqgap2	2:26163226-26309294	4404	0.000111931	2.59258	0.0103837
ENSRNOG00000017900.6	rnf141	1:175631655-175635121	3466	0.000112133	-8.34312	0.0103913
ENSRNOG00000009715.6	Me1	8:94256014-94368944	4009	0.000113161	-7.08303	0.0104752
ENSRNOG00000010890.6	Bmp1	15:52166126-52171474	1524	0.000113628	-9.15447	0.0105071
ENSRNOG00000020679.6	Icam1	8:22044291-22047273	2292	0.000113756	-19.658	0.0105076
ENSRNOG00000001967.5	Sult1b1	14:22142341-22155938	2003	0.000114214	-11.6847	0.0105385
ENSRNOG00000005877.6	Lrpprc	6:7984018-7991883	1208	0.000114948	-2.0317	0.0105948
ENSRNOG00000058249.1	Pgk1	X:77277962-77279816	1335	0.000115215	-2.51924	0.010608
ENSRNOG00000046644.2	Prelid3b	3:172566907-172568950	1121	0.000115726	-2.01315	0.0106436
ENSRNOG00000022054.2	Paqr7	5:152708774-152720303	2261	0.000116304	-3.45808	0.0106852
ENSRNOG00000000604.5	Hdac2	20:43084869-43097729	1847	0.000117668	-3.88459	0.0107874
ENSRNOG00000029441.5	Klhl2	16:26849077-26852312	1486	0.000118327	-6.31971	0.0108352
ENSRNOG00000019891.6	Sgta	7:11537545-11538909	1364	0.000119563	-7.7681	0.0109144
ENSRNOG00000011414.5	Psmc3	3:79879699-79882357	845	0.000121053	-4.47599	0.0110257
ENSRNOG00000001142.3	Prkab1	12:46316301-46326793	2090	0.000121373	-2.29304	0.0110257
ENSRNOG00000010260.7	Dixdc1	8:55090791-55108459	4280	0.000121426	-5.72345	0.0110257
ENSRNOG00000003011.7	Gadd45gip1	19:25948666-25949870	1204	0.000122192	-3.97627	0.0110484
ENSRNOG00000008364.6	Cat	3:93379658-93386066	1427	0.00012239	-2.68478	0.0110546
ENSRNOG00000008271.7	Fam91a1	7:98302795-98342369	5599	0.000125693	6.2875	0.0113291
ENSRNOG00000016984.8	Atg13	3:80578518-80614763	4679	0.000126318	3.94159	0.0113615
ENSRNOG00000005796.7	Ctnna1	18:28053857-28055969	1452	0.000127099	-2.74513	0.0114197
ENSRNOG00000050224.1	Stambpl1	1:252526488-252536119	1368	0.000127622	-9.04766	0.0114547
ENSRNOG00000030237.2	Cox7c	2:14700798-14701912	352	0.000129362	-3.71501	0.0115744
ENSRNOG00000023541.6	Ahctf1	13:98023429-98026704	2592	0.000132466	-8.91395	0.0118152
ENSRNOG00000017023.8	Tcf25	19:56201869-56213431	3747	0.000132616	-5.23187	0.0118162
ENSRNOG00000020937.8	Ubtf	10:90250274-90254424	2942	0.000133862	-6.69866	0.0119148
ENSRNOG00000001963.7	Mx2	11:38057540-38062719	1400	0.000135051	-6.54633	0.0119957
ENSRNOG00000052651.1	LOC102556085	3:114650465-114651832	353	0.000136239	5.81774	0.0120637
ENSRNOG00000002826.5	Hsd17b7	13:88288115-88308018	4866	0.00013643	-3.69563	0.0120681
ENSRNOG00000011044.6	Clmn	6:128466610-128480491	9106	0.000137063	-16.2059	0.0121116
ENSRNOG00000003563.6	Blmh	10:63197366-63198309	943	0.000137264	-3.70444	0.0121169
ENSRNOG00000019097.5	Bap1	16:7344172-7345510	1338	0.000138338	-2.65412	0.012182
ENSRNOG00000045743.2	Etnppl	2:235757261-235760622	3361	0.000138397	-6.07596	0.012182
ENSRNOG00000003078.7	Dcaf6	13:83578718-83584214	609	0.000138766	-10.6771	0.0121992
ENSRNOG00000036689.2	P4hb	10:109736345-109744115	2056	0.000140005	-2.44257	0.0122703
ENSRNOG00000003392.7	Grsf1	14:21044079-21056646	2257	0.000140267	-6.14413	0.0122807
ENSRNOG00000017866.5	Sirt5	17:24009294-24013939	684	0.000140926	-7.46837	0.0123257
ENSRNOG00000015518.7	Rbp4	1:256804401-256813752	3052	0.00014206	-2.14408	0.012387
ENSRNOG00000015301.6	Elp2	18:16576278-16581116	887	0.00014253	-2.78361	0.0124027
ENSRNOG00000011307.7	Slmap	16:2112271-2125854	2550	0.000144319	-10.5159	0.0125224
ENSRNOG00000013002.7	Gpbp1	2:43001855-43015959	1500	0.00014562	-3.4187	0.0125769
ENSRNOG00000031789.5	Rangap1	7:122939164-122953820	3321	0.000147219	-2.77668	0.0126947
ENSRNOG00000047118.2	LOC683897	20:48276084-48294959	1127	0.000148851	-2.39147	0.012814
ENSRNOG00000011667.6	Fastk	4:7260503-7264915	2208	0.000148903	-3.56926	0.012814
ENSRNOG00000047393.2	Krt18	7:143632220-143633260	734	0.000149725	-2.62733	0.0128589
ENSRNOG00000000048.5	Gak	14:2172121-2174353	986	0.000151023	-7.19733	0.0129404
ENSRNOG00000004161.7	Mtif2	14:113963986-113965745	879	0.00015137	-12.6997	0.0129452
ENSRNOG00000020351.8	Vps4a	19:39238618-39243617	1285	0.000154264	-4.09977	0.0131302
ENSRNOG00000004464.7	Sel1l	6:115572621-115584887	5685	0.000157058	11.8915	0.0132495
ENSRNOG00000007895.5	Pdhb	15:18541335-18547072	1654	0.000159851	-8.54835	0.0134454
ENSRNOG00000012826.5	Creb3l2	4:64865708-64916674	6430	0.000160806	7.04745	0.0134999
ENSRNOG00000006709.6	Pzp	4:161804430-161825274	6708	0.000161096	2.0092	0.0134999
ENSRNOG00000009689.4	Api5	3:83310785-83316335	2463	0.000161392	-5.24405	0.0134999
ENSRNOG00000042344.1	Smim22	10:10766398-10767371	420	0.000161793	-2.85925	0.0134999
ENSRNOG00000021824.5	Dnajb1	19:24747135-24750907	2274	0.000161839	6.14598	0.0134999
ENSRNOG00000020989.7	Tm7sf2	1:221425986-221430908	2285	0.000161903	-3.60013	0.0134999
ENSRNOG00000013594.6	Acp2	3:80029310-80030870	1560	0.000161918	-4.63041	0.0134999
ENSRNOG00000027646.4	Pop4	1:94661120-94662796	658	0.000162739	-14.6711	0.013542
ENSRNOG00000001782.6	Osbpl11	11:70770506-70855409	3626	0.000162968	-3.1724	0.0135479
ENSRNOG00000014119.5	Farsb	9:84324441-84353734	864	0.000163424	-3.49946	0.0135594
ENSRNOG00000004601.4	Hao1	3:127437368-127500777	9097	0.00016406	-2.79706	0.0135859
ENSRNOG00000016629.7	Tut7	17:5265747-5280537	2337	0.000165722	-13.7248	0.0137071
ENSRNOG00000017843.6	Polr3k	3:177376181-177379060	856	0.000165844	-26.9615	0.0137071
ENSRNOG00000057601.1	AABR07044080.2	19:56443631-56443869	238	0.000166346	-3.97781	0.0137354
ENSRNOG00000047706.3	LOC103690108	20:3791495-3791766	271	0.000167055	16.205	0.0137673
ENSRNOG00000000512.8	Slc26a8	20:5880615-5897322	2900	0.000167538	-6.23677	0.0137824
ENSRNOG00000006787.6	Dhcr24	5:126188313-126192034	3632	0.00016756	-35.0199	0.0137824
ENSRNOG00000010807.5	Cox6c	7:74723175-74731426	274	0.000168524	-13.3678	0.0138484
ENSRNOG00000038372.4	Ndufs2	13:89606829-89611219	1087	0.000169387	-2.42069	0.0139014
ENSRNOG00000019868.7	Psma5	2:211061123-211073714	507	0.000170011	-36.0698	0.0139234
ENSRNOG00000003264.5	Nat9	10:103732177-103733404	619	0.000170087	-5.90911	0.0139234
ENSRNOG00000009094.4	Nudt4	7:36643666-36660340	3377	0.000171834	2.1025	0.0140396
ENSRNOG00000005861.6	Hsd11b1	13:111946619-111947191	572	0.000172516	-24.9567	0.0140818
ENSRNOG00000020298.6	Bag3	1:199941082-199965192	2504	0.000173218	4.17612	0.0141256
ENSRNOG00000024212.6	Tent4b	19:19774793-19833175	4900	0.000174811	5.59093	0.0141976
ENSRNOG00000017866.5	Sirt5	17:23999049-24013969	1309	0.000174929	-5.51273	0.0141976
ENSRNOG00000011052.6	Gars	4:85269888-85276080	894	0.000177925	-4.05548	0.0144135
ENSRNOG00000029980.3	Zbtb16	8:52980224-52994030	6049	0.000178628	4.21126	0.0144359
ENSRNOG00000036798.4	Dusp3	10:89904572-89916389	3132	0.000178708	-3.91735	0.0144359
ENSRNOG00000020578.8	Ceacam1	1:82327951-82344398	5027	0.000183204	7.62654	0.0147851
ENSRNOG00000016885.6	Klf6	17:67895921-67904921	4210	0.00018513	3.89956	0.0148973
ENSRNOG00000049560.2	Glul	13:71338477-71340771	2294	0.000185298	-6.6199	0.0148973
ENSRNOG00000030126.5	Clk3	8:62527925-62529378	811	0.000185464	-6.02269	0.0148973
ENSRNOG00000050214.2	Amt	8:117077669-117078630	961	0.000185977	-11.6427	0.0149245
ENSRNOG00000011910.7	Hnrnpr	5:154699675-154700050	375	0.000187042	-10.8469	0.0149819
ENSRNOG00000010966.6	Itgb1	19:61716576-61725539	1711	0.000189683	-3.16951	0.0151651
ENSRNOG00000057578.1	Prodh2	1:88968010-88968506	496	0.000190977	-5.90156	0.01524
ENSRNOG00000014625.4	Atp5f1d	7:12426795-12428813	742	0.000193253	-29.5474	0.0153787
ENSRNOG00000017418.5	Rps3	1:164435868-164436978	348	0.000193685	-3.11775	0.0153987
ENSRNOG00000050585.2	Pgam1	1:261163610-261165982	1601	0.000193974	-8.55568	0.0154074
ENSRNOG00000031479.4	Hdlbp	9:100554562-100561647	3152	0.00019513	-2.38817	0.0154849
ENSRNOG00000017820.5	Nqo2	17:32131840-32136187	1106	0.000196735	-8.41127	0.0155978
ENSRNOG00000037500.3	Pus1	12:51937158-51945930	1492	0.000197487	-4.1948	0.0156084
ENSRNOG00000002839.6	Slc19a2	13:82552549-82566600	3229	0.000197598	3.56503	0.0156084
ENSRNOG00000006388.5	Pygl	6:92597125-92618641	2932	0.000201777	-2.42059	0.0158945
ENSRNOG00000010218.7	Eif5	6:136003088-136004495	1407	0.000202722	7.15819	0.0159531
ENSRNOG00000010748.8	Mtus1	16:54358289-54386129	3561	0.000202893	-4.29463	0.0159531
ENSRNOG00000000470.7	Vps52	20:5430737-5432134	1397	0.000205924	-10.0293	0.0161522
ENSRNOG00000052604.1	LOC100361907	13:56747023-56747705	301	0.000205991	2.41311	0.0161522
ENSRNOG00000011622.5	Echdc1	1:30874234-30875787	1553	0.000208037	-5.81114	0.0162545
ENSRNOG00000002735.6	Dhx9	13:70885502-70888100	1319	0.000208139	-3.663	0.0162545
ENSRNOG00000000787.7	AABR07044364.1	20:3248133-3249189	750	0.000208332	-7.02446	0.0162545
ENSRNOG00000025764.5	AC128848.1	19:11301977-11302994	931	0.000208741	2.31253	0.0162635
ENSRNOG00000013704.5	Cps1	9:74220172-74225202	361	0.000209201	-17.3306	0.0162764
ENSRNOG00000020730.7	Nbr1	10:89455563-89463626	470	0.000209286	5.90523	0.0162764
ENSRNOG00000011781.6	Oplah	7:117353785-117356066	1481	0.000211079	-2.87001	0.016401
ENSRNOG00000042714.2	RGD1559459	14:22932478-22955679	4654	0.000212538	3.25067	0.0164897
ENSRNOG00000017571.5	Ndufa2	18:29585402-29587784	852	0.000212606	-12.6317	0.0164897
ENSRNOG00000005794.3	Slc10a1	6:104617125-104624231	2010	0.000213285	-3.73876	0.0165274
ENSRNOG00000059753.1	Gys2	4:176638625-176659541	1298	0.00021374	-2.14228	0.0165328
ENSRNOG00000007457.4	Serping1	3:72160928-72170996	2564	0.000213742	5.79419	0.0165328
ENSRNOG00000005275.6	Shmt1	10:47030811-47038266	1193	0.000218545	-4.36422	0.0168132
ENSRNOG00000034242.3	Vcp	5:58425174-58429979	3005	0.000220452	-10.5013	0.0169447
ENSRNOG00000001825.7	AABR07034767.1	11:88910058-88941126	3676	0.000221962	-4.26699	0.0170302
ENSRNOG00000009934.4	Emc3	4:145471453-145474496	1313	0.000223282	-3.14451	0.0171162
ENSRNOG00000011039.7	Gch1	15:23933267-23937853	2164	0.000223872	-6.43751	0.0171398
ENSRNOG00000019264.4	Ltbr	4:157822839-157825300	1184	0.000224928	-4.20042	0.0171655
ENSRNOG00000050360.2	Urad	12:9452619-9456970	4351	0.00022528	-2.24915	0.017177
ENSRNOG00000016064.6	Tkt	16:6610239-6635877	3410	0.0002255	-2.20107	0.0171786
ENSRNOG00000013004.7	Akr1d1	4:65110601-65116578	519	0.000226552	2.9666	0.017228
ENSRNOG00000004741.5	Rpl19	10:85981771-85981982	211	0.000230223	-3.75588	0.0174326
ENSRNOG00000000438.5	Rnf5	20:4495424-4497308	989	0.000230261	2.24886	0.0174326
ENSRNOG00000049219.1	Rnf187	10:45273235-45277801	1718	0.000231275	-13.928	0.0174785
ENSRNOG00000007587.6	Tcp11l2	7:24858959-24893909	2574	0.000231659	5.15421	0.0174921
ENSRNOG00000011612.3	Tdo2	2:180896194-180902003	3336	0.000232254	3.77402	0.0175216
ENSRNOG00000002389.5	Morf4l2	X:107394470-107397279	1737	0.000233914	-2.17201	0.0176304
ENSRNOG00000019506.7	Dnajb2	9:82442293-82444718	2425	0.000234272	-5.70233	0.0176304
ENSRNOG00000024629.6	Hadha	6:27619051-27629691	2333	0.000234315	-2.24178	0.0176304
ENSRNOG00000001706.8	Kalrn	11:69917022-69990768	3889	0.000236119	-4.11829	0.0177506
ENSRNOG00000057832.1	Rnf125	18:15190191-15213254	3878	0.000236713	4.37605	0.0177796
ENSRNOG00000023271.7	Parl	11:84533842-84544489	799	0.000239179	-3.56531	0.0179334
ENSRNOG00000037167.2	Rtp3	8:119260617-119264694	2131	0.000243559	25.1838	0.0182458
ENSRNOG00000020182.5	Mvp	1:198420658-198423955	1355	0.000244835	-2.45993	0.0183254
ENSRNOG00000002125.5	Ccni	14:16341524-16364650	3079	0.000247536	3.92341	0.0184464
ENSRNOG00000003980.5	Ttc1	10:29342334-29348994	823	0.000247649	-29.3857	0.0184464
ENSRNOG00000014097.6	Psmd7	19:39639375-39644113	1356	0.000247954	-27.562	0.0184464
ENSRNOG00000004072.6	Myo1c	10:63819005-63820407	1402	0.000247959	-3.34203	0.0184464
ENSRNOG00000001106.7	Denr	12:38094588-38117753	2152	0.000250076	-3.08685	0.0185716
ENSRNOG00000025940.3	Mettl9	1:190990711-191009933	1050	0.000250317	-9.72341	0.0185734
ENSRNOG00000003334.5	Klhl21	5:169181383-169190074	3865	0.000251356	4.84266	0.0186182
ENSRNOG00000006355.7	Akap8l	7:14351789-14369821	3831	0.000252952	3.43165	0.0187101
ENSRNOG00000022153.6	Tmem134	1:219378874-219379596	500	0.000256155	-7.64484	0.0189245
ENSRNOG00000019113.7	Hnrnpk	17:6674533-6677486	2237	0.000256603	-2.92532	0.0189413
ENSRNOG00000018985.7	Grk2	1:219533623-219537695	3757	0.000260336	-16.6002	0.0192003
ENSRNOG00000015999.6	Cirbp	7:12400334-12405059	2233	0.00026061	-14.9241	0.019204
ENSRNOG00000003020.6	Slc25a47	6:132764739-132768747	2255	0.000262662	-7.3395	0.0193385
ENSRNOG00000020704.5	Tkfc	1:226642711-226652742	3602	0.000263868	-74.6656	0.019394
ENSRNOG00000007431.8	Shroom1	10:38822665-38825480	2491	0.000264843	-15.7695	0.0194489
ENSRNOG00000007356.4	Chmp3	4:99474534-99496154	2355	0.000265165	-9.87555	0.0194559
ENSRNOG00000019529.5	Btbd1	1:143609691-143612105	1896	0.000265904	-5.72397	0.0194934
ENSRNOG00000028730.5	Lcn12	3:2716458-2721882	5424	0.000268096	-3.10144	0.0195955
ENSRNOG00000009280.5	Mkrn1	4:67185161-67186896	1735	0.0002683	-16.1112	0.0195955
ENSRNOG00000005082.5	Irf6	13:111886525-111889366	2841	0.000268441	-3.9	0.0195955
ENSRNOG00000022500.4	Rwdd4	16:47856465-47861406	2369	0.000269732	-5.31616	0.0196559
ENSRNOG00000038370.4	AABR07034632.1	11:81714513-81717821	873	0.000269957	32.9358	0.0196559
ENSRNOG00000046585.2	AABR07054370.1	3:150218089-150225153	580	0.000271462	-8.60434	0.0197403
ENSRNOG00000009567.8	Mrpl10	10:84982757-84984792	1299	0.000274433	-6.38347	0.0199141
ENSRNOG00000004089.7	Enpp2	7:94479924-94487714	1010	0.00027553	-2.06112	0.0199768
ENSRNOG00000004281.7	Cobl	14:92341972-92344618	2646	0.000276338	-8.98286	0.0200184
ENSRNOG00000002695.3	Tfb2m	13:97820489-97825701	1278	0.000276685	-5.9756	0.0200266
ENSRNOG00000033164.5	Cyp2b3	1:83162980-83194038	1037	0.000277566	22.3581	0.0200734
ENSRNOG00000040120.4	Bhmt2	2:23270042-23289331	4315	0.000278901	-28.9471	0.0201529
ENSRNOG00000038825.3	Fabp12	2:93715026-93725167	1444	0.000280335	-2.13011	0.0202197
ENSRNOG00000033740.3	Lurap1l	5:98468299-98515857	2712	0.000283597	2.69098	0.0204232
ENSRNOG00000002478.5	Insig2	13:37264792-37287473	2525	0.000286463	-3.16304	0.0205778
ENSRNOG00000016150.5	Ifrd2	8:116346861-116348320	1067	0.000289477	-5.96918	0.020742
ENSRNOG00000013763.6	Erlin2	16:69178965-69182614	3308	0.00029117	-3.5186	0.0208285
ENSRNOG00000015425.8	Ssx2ip	2:252294500-252296162	1662	0.000292734	-3.49046	0.0208675
ENSRNOG00000049057.1	Znrf2	4:85007313-85009902	2589	0.00029315	3.52422	0.0208675
ENSRNOG00000001052.7	Slc25a30	15:57811611-57819964	2933	0.000293177	-3.96339	0.0208675
ENSRNOG00000020683.7	Hnrnpul1	1:82511588-82517840	3177	0.000296049	-17.4797	0.0210195
ENSRNOG00000031479.4	Hdlbp	9:100554562-100592317	6257	0.000302265	4.56283	0.0214076
ENSRNOG00000006326.7	Atraid	6:26680597-26681291	503	0.000302947	-6.15022	0.0214381
ENSRNOG00000005229.8	Sec16b	13:75213411-75216942	1698	0.000304312	-2.00125	0.0215169
ENSRNOG00000048834.2	Plin3	9:10773789-10782199	2518	0.000304937	-2.18554	0.0215434
ENSRNOG00000023383.6	Ddx3x	X:10400356-10414003	4651	0.000306042	3.51077	0.0215947
ENSRNOG00000002039.6	Evi5	14:2980742-3038238	4244	0.000309102	4.52047	0.0217837
ENSRNOG00000009434.7	RGD1310507	8:111740486-111749349	1945	0.00031006	-6.21559	0.0218267
ENSRNOG00000036678.4	Aspscr1	10:109884188-109889353	468	0.000310222	-2.02199	0.0218267
ENSRNOG00000025936.5	Rpl6	12:40877573-40879259	1686	0.000310539	-2.59593	0.0218311
ENSRNOG00000021916.5	Slc16a12	1:252975578-252980610	3504	0.00031146	-3.30264	0.0218778
ENSRNOG00000008988.4	Cyp2d2	7:123650574-123656345	4228	0.000312006	-2.14802	0.0218803
ENSRNOG00000017223.7	Plg	1:48521771-48522789	843	0.000314043	-4.31997	0.0220051
ENSRNOG00000038883.4	LOC294154	20:7331317-7397591	3454	0.000316485	5.96766	0.0221219
ENSRNOG00000009878.7	Crtapl1	8:122382612-122387408	706	0.000318294	-23.0316	0.0222207
ENSRNOG00000011503.8	Shb	5:60969487-61004137	2572	0.000318417	-5.97495	0.0222207
ENSRNOG00000036693.2	Slc25a10	10:109668839-109675060	3603	0.000321473	-7.49891	0.0224023
ENSRNOG00000016552.6	Hmgcs1	2:52427538-52445268	3496	0.000324642	-4.00859	0.0225815
ENSRNOG00000009102.7	Fermt2	15:19807807-19811925	1997	0.000325569	-2.53449	0.0226092
ENSRNOG00000019598.8	Vegfa	9:17340325-17355685	4272	0.000326506	4.55236	0.0226559
ENSRNOG00000008079.7	Ugp2	14:106206355-106216457	2962	0.000333033	-4.62874	0.0230156
ENSRNOG00000005333.6	Azin1	7:77345645-77351313	2851	0.000339954	-3.62699	0.023456
ENSRNOG00000015077.7	Acsf3	19:55621514-55635322	915	0.000341803	-2.33659	0.0235646
ENSRNOG00000016321.7	Entpd4	15:51247528-51251197	1970	0.000342605	-25.05	0.0236009
ENSRNOG00000017829.5	Ssu72	5:173181580-173182720	552	0.00034476	-4.20774	0.0236922
ENSRNOG00000007529.4	Bmf	3:110303514-110324086	4638	0.000346578	-12.2905	0.0237863
ENSRNOG00000024603.4	Rps15	7:12282108-12283549	803	0.000346686	3.13151	0.0237863
ENSRNOG00000020763.8	Snrnp70	1:101367437-101368460	945	0.000347011	-3.04825	0.0237896
ENSRNOG00000013552.6	Scd	1:264155451-264172936	9359	0.000348281	3.61332	0.0238324
ENSRNOG00000003177.7	Mat2b	10:25832071-25838243	1487	0.000348346	-4.34758	0.0238324
ENSRNOG00000021380.5	Fads6	10:103830728-103833958	3230	0.000349518	-2.83551	0.0238849
ENSRNOG00000017071.5	Babam1	16:19794731-19798971	926	0.00035032	-28.073	0.0239134
ENSRNOG00000001142.3	Prkab1	12:46316235-46326793	2058	0.000350493	-14.8983	0.0239134
ENSRNOG00000017752.6	Mccc2	2:30174975-30181426	715	0.000351287	-10.216	0.0239485
ENSRNOG00000007570.4	Dera	4:171825252-171826423	946	0.000352089	-3.41315	0.023984
ENSRNOG00000015914.7	U2af2	1:72312251-72329879	3427	0.000353122	3.42698	0.0240193
ENSRNOG00000018698.7	Wac	17:60946385-60946831	446	0.000353685	5.38292	0.0240354
ENSRNOG00000018566.6	Ctsl	17:1868785-1879316	8198	0.000357174	4.13356	0.0242148
ENSRNOG00000028891.4	Cyp2t1	1:83966541-83969981	1961	0.000357581	-4.04306	0.0242233
ENSRNOG00000003723.5	Wdr26	13:99493119-99501238	4783	0.000358271	-5.73038	0.0242415
ENSRNOG00000004391.7	AABR07057436.1	7:71125218-71138423	1451	0.000358417	2.16986	0.0242415
ENSRNOG00000021158.4	Nudt22	1:222247499-222248254	397	0.000358997	-24.6148	0.0242616
ENSRNOG00000010262.6	Hdc	3:119057475-119070789	2319	0.000360259	-13.5745	0.0243085
ENSRNOG00000002946.3	Socs3	10:106973850-106977052	2641	0.000362212	4.67121	0.0244205
ENSRNOG00000002948.7	Abcc3	10:82047279-82050760	757	0.000362488	-3.27194	0.0244205
ENSRNOG00000001345.8	Mapkapk5	12:40509799-40529358	2280	0.00036323	9.07226	0.0244346
ENSRNOG00000017952.4	Septin2	9:100655907-100658049	2142	0.000363269	-2.71626	0.0244346
ENSRNOG00000054863.1	Usp4	8:117162772-117170519	1639	0.000363555	-3.22314	0.0244347
ENSRNOG00000033386.5	Itih1	16:7011806-7016180	1888	0.000364354	-3.23119	0.02445
ENSRNOG00000020259.7	RGD1305347	5:137357443-137360640	1130	0.000365919	22.3341	0.0245335
ENSRNOG00000014879.6	Ttc7a	6:11000976-11014507	2309	0.000366642	-2.32441	0.0245335
ENSRNOG00000005849.7	Aco1	5:56472154-56481900	2168	0.000366855	-2.13859	0.0245335
ENSRNOG00000015078.7	Ifitm3	1:213810645-213811014	369	0.000367031	-9.34597	0.0245335
ENSRNOG00000045791.2	Eif4a3	10:108415189-108425206	1512	0.000367449	-3.27113	0.0245422
ENSRNOG00000024170.5	Phf5a	7:123095269-123101869	891	0.000367945	-2.97102	0.0245562
ENSRNOG00000009889.6	Pgm1	5:118779965-118803097	1521	0.000372127	-7.53173	0.0248087
ENSRNOG00000020918.5	Ccnd1	1:218090747-218093822	3075	0.000372307	-6.81948	0.0248087
ENSRNOG00000016427.6	Letm1	14:82266865-82270377	3512	0.000377093	-3.63858	0.0250885
ENSRNOG00000004342.7	Ahr	6:54963742-55001882	7533	0.000377755	8.85077	0.0251131
ENSRNOG00000019282.7	Ubqln1	17:6840123-6878850	3912	0.000379449	3.26057	0.0252061
ENSRNOG00000017775.6	Slc5a1	14:82908934-82975395	4127	0.00038109	10.2997	0.0252759
ENSRNOG00000049378.2	AABR07062583.1	4:183476089-183537972	1279	0.000382995	3.37793	0.02537
ENSRNOG00000018233.6	Gas6	16:81213358-81243846	2632	0.000383101	8.11506	0.02537
ENSRNOG00000022877.6	Poldip3	7:123992166-123995681	2412	0.000386468	-3.32485	0.0255141
ENSRNOG00000019294.3	Stk16	9:82413117-82414338	751	0.00038969	-5.43134	0.0256674
ENSRNOG00000048719.2	Dtnbp1	17:20181903-20184596	2693	0.000392721	-6.17872	0.0257998
ENSRNOG00000023910.3	Man2b1	19:26215259-26216436	740	0.000392905	-3.37584	0.0257998
ENSRNOG00000000264.5	Def8	19:56257203-56259204	2001	0.000393847	-3.09759	0.0258418
ENSRNOG00000029668.4	Wfdc21	10:71047238-71053200	460	0.000394191	-3.47137	0.0258446
ENSRNOG00000020254.7	Per2	9:98582876-98597382	1123	0.000395319	-8.1569	0.0258987
ENSRNOG00000008103.7	Mdh1	14:106378028-106393670	2226	0.000401591	-2.22344	0.0262895
ENSRNOG00000009446.4	Rxra	3:6272560-6303406	9428	0.000402202	2.26359	0.0262945
ENSRNOG00000017821.7	Agxt2	2:60372783-60379454	1158	0.000404871	-5.15174	0.0264175
ENSRNOG00000003261.7	Usp9x	X:10526026-10533028	1415	0.000405089	3.66109	0.0264175
ENSRNOG00000031420.2	Hyal2	8:116328084-116328980	896	0.000406882	-5.93009	0.0265142
ENSRNOG00000016383.5	Commd3	17:85356037-85359846	936	0.000407541	-2.3852	0.026537
ENSRNOG00000007139.2	Ttpa	5:34011087-34023671	5932	0.000410809	4.54701	0.0267294
ENSRNOG00000000610.6	Cisd1	20:18492903-18508422	7465	0.000411593	4.48365	0.0267599
ENSRNOG00000042411.3	Rps6ka1	5:152078097-152089780	1666	0.000412613	-2.42747	0.0267858
ENSRNOG00000018183.7	Ubr4	5:157939069-157957155	3293	0.00041374	-25.1905	0.0268182
ENSRNOG00000014901.5	Uggt1	9:42692104-42698747	4629	0.00041857	-3.26551	0.0270903
ENSRNOG00000000397.6	Ccar1	20:32374626-32383870	1322	0.000424068	-3.91704	0.0273865
ENSRNOG00000038202.3	Calml4	8:67753278-67765360	898	0.000424105	-11.1138	0.0273865
ENSRNOG00000023816.5	Aph1a	2:198007742-198010612	1984	0.00042775	-2.81952	0.027601
ENSRNOG00000008095.6	Onecut1	8:81792371-81799905	7534	0.000428904	-2.45055	0.0276128
ENSRNOG00000004700.7	Nxt1	3:142995832-142996589	757	0.000428986	-5.94607	0.0276128
ENSRNOG00000020506.6	Khnyn	15:34551649-34561727	2200	0.000429517	4.53119	0.0276128
ENSRNOG00000020016.3	Lamtor1	1:166995820-166998201	1903	0.000430729	-22.7397	0.0276532
ENSRNOG00000009355.6	Ogfr	3:176097801-176099987	1700	0.00043082	-2.5121	0.0276532
ENSRNOG00000043171.4	Hdhd2	18:73226516-73237189	1485	0.000432784	24.8254	0.0277585
ENSRNOG00000025592.5	Tspan31	7:70355642-70356306	389	0.000434571	-4.0729	0.0277928
ENSRNOG00000005358.5	Pmm1	7:123183489-123184441	676	0.000434617	-16.8136	0.0277928
ENSRNOG00000005504.8	Pkp4	3:45401464-45414613	1843	0.000439002	6.82145	0.0280104
ENSRNOG00000007089.5	Lgmn	6:126281992-126292065	1640	0.000439969	-6.23958	0.0280303
ENSRNOG00000007324.7	Plxna2	13:113565108-113571694	5601	0.000441085	-10.4823	0.0280598
ENSRNOG00000002701.6	Hgd	11:65983212-66035051	12288	0.000442328	4.04908	0.0281179
ENSRNOG00000018114.7	Acadvl	10:56618282-56624526	3198	0.000443559	-6.5677	0.0281752
ENSRNOG00000002267.7	Chic2	14:35683229-35713178	933	0.000445901	10.3343	0.0282222
ENSRNOG00000020567.6	Fibp	1:220840081-220844409	1216	0.00044669	7.93929	0.0282222
ENSRNOG00000039865.3	Vnn3	1:22648647-22651443	937	0.000446753	-5.16415	0.0282222
ENSRNOG00000008672.7	Chmp5	5:57269093-57284459	1125	0.000446935	-31.7122	0.0282222
ENSRNOG00000006545.8	Septin7	8:26475551-26476616	1065	0.000449881	-3.63691	0.0283872
ENSRNOG00000009550.7	Sqle	7:99609201-99625874	2907	0.000451119	-6.28064	0.0284235
ENSRNOG00000037229.2	Gmppb	8:116826682-116829354	1678	0.000452508	-3.23658	0.0284691
ENSRNOG00000012366.6	Mesd	1:146041591-146043102	1511	0.00045434	-6.65894	0.0285634
ENSRNOG00000007692.7	Ift52	3:159407973-159413520	1267	0.000457104	-3.63581	0.028716
ENSRNOG00000009734.4	Akr1b8	4:61782090-61784922	495	0.000458952	5.27149	0.028793
ENSRNOG00000059330.1	AABR07004549.1	1:147420485-147427835	3291	0.000462809	2.33946	0.0290106
ENSRNOG00000011421.7	Smap2	5:139885250-139894157	2220	0.000464891	-2.50299	0.0291133
ENSRNOG00000015029.6	Dbt	2:219590692-219592656	1964	0.000465128	-2.96698	0.0291133
ENSRNOG00000057557.1	Prlr	2:60131379-60131893	514	0.000467154	2.68207	0.0291762
ENSRNOG00000008274.3	Xpc	4:123133878-123138009	1977	0.000471759	-5.89518	0.0294209
ENSRNOG00000016122.4	Hmgcr	2:27477710-27487783	5681	0.00047244	-13.4255	0.0294419
ENSRNOG00000053814.1	AC105531.1	10:71355777-71358453	1173	0.00047516	2.6308	0.0295469
ENSRNOG00000013137.4	Clec4f	4:115322051-115323363	812	0.000477992	-4.42718	0.0296523
ENSRNOG00000010028.4	Polr3d	15:52129470-52131193	1419	0.000478241	-13.9586	0.0296523
ENSRNOG00000023830.4	Dnase2	19:26023690-26025532	1036	0.000479457	-11.0552	0.0297062
ENSRNOG00000017441.8	Tpm3	2:189441195-189451346	1430	0.00048067	-4.63133	0.0297116
ENSRNOG00000002052.6	Ccdc80	11:60645006-60650353	2196	0.000482503	-9.89937	0.0297872
ENSRNOG00000018825.6	Dcaf11	15:34243582-34245464	1882	0.000485936	-7.3709	0.0299775
ENSRNOG00000016234.5	Ciapin1	19:10596941-10610049	1869	0.000488082	16.5086	0.0300665
ENSRNOG00000006420.6	Rbm38	3:171037888-171050497	1779	0.000489288	3.59839	0.0301192
ENSRNOG00000054352.1	Atp6ap1	X:156407936-156412627	1985	0.000492097	-21.5332	0.0302463
ENSRNOG00000007838.6	Ddx47	4:168778566-168788601	2551	0.000492413	-19.8223	0.0302463
ENSRNOG00000017106.6	Csnk1a1	18:56902506-56921160	4289	0.000493449	-3.54392	0.0302882
ENSRNOG00000013454.4	Rala	17:49676083-49729128	2643	0.000494171	-4.04445	0.0303108
ENSRNOG00000009845.3	Acadm	2:260124324-260141800	1584	0.00049776	-2.51816	0.030475
ENSRNOG00000023910.3	Man2b1	19:26198647-26216436	3032	0.000498447	-6.59082	0.030475
ENSRNOG00000030391.4	Ei24	8:39257460-39271198	987	0.000498479	2.55948	0.030475
ENSRNOG00000050552.2	AABR07053516.1	3:112333981-112358530	565	0.000498628	16.1836	0.030475
ENSRNOG00000038366.5	Larp1b	2:127844544-127876793	3505	0.000499617	17.5601	0.0305137
ENSRNOG00000001653.5	St3gal6	11:44176807-44216029	1009	0.000500504	25.6019	0.0305461
ENSRNOG00000001229.6	Col18a1	20:12270841-12289508	2417	0.000502864	2.83875	0.0306662
ENSRNOG00000014155.7	Spart	2:144539656-144548968	1990	0.000503905	-2.93276	0.0306662
ENSRNOG00000033164.5	Cyp2b3	1:83163002-83194038	1015	0.000506455	-7.33886	0.0307995
ENSRNOG00000016665.7	Tpra1	4:120849884-120854534	1310	0.000513928	-4.60611	0.0312097
ENSRNOG00000019456.6	Kars	19:44212146-44219488	1368	0.00051511	-3.8417	0.0312593
ENSRNOG00000009615.7	Mtor	5:165369171-165373967	1052	0.000515886	-4.9594	0.0312646
ENSRNOG00000033215.6	RT1-Db1	20:4094874-4097190	1019	0.000515928	-5.22144	0.0312646
ENSRNOG00000010325.8	Ptger3	2:263978768-263979689	921	0.000516882	-5.24594	0.0312985
ENSRNOG00000016234.5	Ciapin1	19:10608853-10610049	808	0.000517218	-4.3906	0.0312985
ENSRNOG00000016309.8	Rgp1	5:59088229-59088778	549	0.000520136	-2.34722	0.031422
ENSRNOG00000029049.4	Zdhhc14	1:46648234-46649293	1059	0.000521842	-12.3752	0.0314893
ENSRNOG00000000150.7	Dnajc1	17:84986990-84990125	835	0.000523225	-11.4809	0.0315505
ENSRNOG00000006206.7	Tmem106b	4:39522516-39540257	7310	0.000524826	-19.3847	0.0315764
ENSRNOG00000024016.7	Cyp2c6v1	1:147883932-147886012	469	0.00052513	7.35209	0.0315764
ENSRNOG00000010966.6	Itgb1	19:61677460-61725552	3756	0.000525615	4.67921	0.0315802
ENSRNOG00000014886.5	Fam107b	17:78489665-78497748	2930	0.00052873	3.56659	0.031726
ENSRNOG00000005308.4	Tmx2	3:72072233-72076519	2034	0.000535963	-2.94151	0.0320701
ENSRNOG00000006905.7	Hectd1	6:72562524-72567238	762	0.000537742	-22.668	0.0321541
ENSRNOG00000008320.3	Lypla1	5:14559211-14564893	2064	0.000550826	-6.6405	0.0328905
ENSRNOG00000010389.6	Ndrg2	15:28305629-28313902	2260	0.000554406	19.6767	0.0330352
ENSRNOG00000030294.5	Eml4	6:6637304-6674603	4412	0.0005573	5.73535	0.0331615
ENSRNOG00000017505.6	Npepo	17:819622-825694	1384	0.000562271	-3.79826	0.0333414
ENSRNOG00000001973.8	Ugt2a3	14:22326056-22346219	2371	0.000562746	20.2278	0.0333465
ENSRNOG00000036693.2	Slc25a10	10:109665277-109675060	4237	0.000564134	-11.1329	0.0334056
ENSRNOG00000018176.7	Rab6a	1:165659726-165664198	2485	0.000568766	-13.1939	0.0336102
ENSRNOG00000012297.4	Marchf8	4:148394530-148398529	3999	0.000569327	-5.28771	0.0336201
ENSRNOG00000050860.2	Abcb11	3:55522462-55544882	4667	0.000570662	5.6884	0.0336359
ENSRNOG00000012928.7	Prmt9	19:34070631-34071399	503	0.000570719	-4.64235	0.0336359
ENSRNOG00000006859.6	Insig1	4:344441-351125	2624	0.00057235	-2.69473	0.0337057
ENSRNOG00000028650.7	Inf2	6:137171625-137180626	2567	0.000582305	-3.41323	0.0341744
ENSRNOG00000031312.5	Tnfrsf1a	4:157876166-157878174	1728	0.00058988	-4.25953	0.0345952
ENSRNOG00000026504.5	Fam114a1	14:44941694-44943288	1594	0.000591038	-3.02691	0.0346395
ENSRNOG00000001989.6	Alcam	11:50969428-50987099	3187	0.000595816	-2.09649	0.0348956
ENSRNOG00000019760.6	Oxnad1	16:8234428-8235570	1142	0.000597352	-4.46763	0.0349321
ENSRNOG00000031769.3	Chchd7	5:16843204-16847908	709	0.000597663	-4.118	0.0349321
ENSRNOG00000019655.7	Atp6v0b	5:136718350-136720235	715	0.000598132	-4.93543	0.0349356
ENSRNOG00000013133.3	Foxa2	3:142382963-142387531	2588	0.000602499	-14.292	0.0351563
ENSRNOG00000024924.3	Cep19	11:71921684-71922918	1234	0.000602743	-4.22046	0.0351563
ENSRNOG00000061499.1	Kmt2d	7:140489252-140516726	7087	0.000603141	4.55969	0.0351563
ENSRNOG00000047945.2	Cyp2c12	1:258716743-258725489	258	0.000603628	-5.73302	0.0351607
ENSRNOG00000012954.7	Eefsec	4:120194334-120219451	1233	0.000604714	-5.03148	0.0351905
ENSRNOG00000053769.1	Soat2	7:143761815-143767993	2300	0.000604961	7.09592	0.0351905
ENSRNOG00000053210.1	Zc3h11a	13:50233074-50238102	3734	0.000624893	-4.68021	0.0361534
ENSRNOG00000001890.7	Txnrd2	11:86667990-86672544	692	0.000626323	-5.93811	0.0362117
ENSRNOG00000016907.5	Ppp5c	1:78943789-78948277	1610	0.000633792	-5.18199	0.0365694
ENSRNOG00000021295.5	Rae1	3:171024431-171030406	932	0.000636851	-3.404	0.0367154
ENSRNOG00000006756.8	Maged1	X:63803188-63804072	675	0.000639338	-2.23488	0.036815
ENSRNOG00000005882.7	Tle1	5:88627230-88630306	1114	0.000642744	19.6213	0.0369863
ENSRNOG00000013408.5	Npas2	9:46052693-46081889	2403	0.000646562	12.118	0.037181
ENSRNOG00000048878.1	Smim24	7:11183374-11186275	697	0.00065754	-4.59247	0.037773
ENSRNOG00000016349.4	Gnmt	9:16567914-16568633	546	0.000657738	-3.00916	0.037773
ENSRNOG00000012826.5	Creb3l2	4:64981084-64981535	451	0.000658221	4.93176	0.0377754
ENSRNOG00000017066.8	Zfp384	4:157550930-157552842	1912	0.000659338	-10.897	0.0377898
ENSRNOG00000000340.7	Rtraf	15:4891462-4893968	498	0.000659797	-21.2196	0.0377898
ENSRNOG00000012959.7	Nab1	9:53934827-53945639	3632	0.000661875	-5.9299	0.0378582
ENSRNOG00000051171.2	G6pc	10:89285854-89296006	5918	0.000666478	4.91503	0.0380583
ENSRNOG00000054077.1	AABR07024870.1	16:20229722-20236310	2380	0.000666992	2.37416	0.0380583
ENSRNOG00000022485.6	Chuk	1:263848115-263859694	2581	0.00066773	-6.08362	0.038066
ENSRNOG00000057194.1	Tars2	2:197861069-197861569	500	0.00067044	-4.81561	0.038195
ENSRNOG00000017170.5	Med4	15:55413830-55416817	919	0.000673941	-9.43247	0.0383689
ENSRNOG00000012933.7	Prcc	2:187232456-187240887	848	0.000677083	-2.7224	0.0385222
ENSRNOG00000019742.5	Stat3	10:88790394-88797554	2755	0.000680175	-10.5584	0.0386467
ENSRNOG00000019253.8	Bcar1	19:43932536-43934808	1045	0.000682117	-14.9748	0.0387314
ENSRNOG00000061928.1	Myo1e	8:76839326-76840561	1235	0.000687936	-3.14595	0.0389843
ENSRNOG00000004537.6	Rxrg	13:85849447-85868554	930	0.000691044	-2.57971	0.0391086
ENSRNOG00000048874.2	Gckr	6:26373444-26385970	3175	0.000691932	3.57103	0.0391164
ENSRNOG00000008713.6	Slc41a2	7:26581776-26608150	3447	0.000692254	-5.9844	0.0391164
ENSRNOG00000016727.5	Akr1a1	5:135482002-135483781	394	0.000692551	-135.04	0.0391164
ENSRNOG00000017420.7	Nudt6	2:124134303-124141544	668	0.00069765	-13.314	0.0393524
ENSRNOG00000019077.5	Lipa	1:252829277-252849833	1032	0.00071028	6.59878	0.0399858
ENSRNOG00000019143.7	Galnt2	19:57112483-57115128	2645	0.00071245	-3.73339	0.0400816
ENSRNOG00000027761.6	Htatsf1	X:159526031-159528332	1793	0.000716041	-2.7351	0.0402308
ENSRNOG00000005668.7	Ndufa8	3:15362847-15366542	596	0.000721271	-16.0615	0.040445
ENSRNOG00000004659.5	Creld2	7:129812716-129819643	1423	0.000723965	3.55477	0.0405656
ENSRNOG00000006392.7	Xrcc6	7:123260606-123280685	2073	0.000724369	-3.03032	0.0405656
ENSRNOG00000018740.8	Ugt1a6	9:95298487-95302838	1623	0.000728257	-2.61088	0.0407301
ENSRNOG00000028411.6	Pcnp	11:47055777-47064130	398	0.000732483	10.397	0.0409395
ENSRNOG00000059702.1	Tex9	8:79083454-79101009	883	0.000732958	-5.27207	0.0409395
ENSRNOG00000032878.3	Cxxc5	18:28626401-28656916	3450	0.000733693	6.41774	0.0409425
ENSRNOG00000019626.4	Slc27a5	1:65582448-65587733	1780	0.000733969	-27.5718	0.0409425
ENSRNOG00000001710.5	Abcf3	11:84025241-84034471	2308	0.000735505	-5.32058	0.0410015
ENSRNOG00000059402.1	Itgb1bp1	6:43348734-43352819	1108	0.000741602	-12.1606	0.0412608
ENSRNOG00000013507.7	Selenot	2:148779320-148782852	3148	0.000742537	-4.13797	0.041286
ENSRNOG00000004659.5	Creld2	7:129816739-129819643	670	0.000748828	-10.3772	0.0415818
ENSRNOG00000020596.7	Dmac2	1:82417884-82419167	1283	0.000752433	-4.13317	0.0417549
ENSRNOG00000005775.8	Phf14	4:38379340-38420205	336	0.000753747	-19.4981	0.0418008
ENSRNOG00000019812.5	Nr1h2	1:100554543-100556852	854	0.000754449	-8.95087	0.0418126
ENSRNOG00000045926.2	Lrrc45	10:109903330-109903908	578	0.000755827	-2.49148	0.0418605
ENSRNOG00000001823.8	St6gal1	11:80976614-80981423	1453	0.000756654	2.75915	0.0418605
ENSRNOG00000018336.6	Eps8l2	1:214352555-214353526	971	0.000758599	-21.3874	0.041907
ENSRNOG00000056940.1	Cited2	1:12824063-12825806	1743	0.000759739	-4.90553	0.0419313
ENSRNOG00000019587.6	Ptprn	9:82446622-82448338	784	0.000760019	-6.68761	0.0419313
ENSRNOG00000018920.5	Slc25a17	7:122539292-122544184	1055	0.000761313	-6.92418	0.0419486
ENSRNOG00000057557.1	Prlr	2:60261115-60327728	3590	0.000765134	2.22303	0.042062
ENSRNOG00000010224.6	Rab30	1:157646051-157662073	3565	0.000765335	5.75805	0.042062
ENSRNOG00000015035.7	Myo7b	18:24746656-24749025	1022	0.000766935	-4.07206	0.0421229
ENSRNOG00000009245.7	Exosc2	3:10151279-10161989	1906	0.000767538	-5.55571	0.042129
ENSRNOG00000049900.1	Irf2bp2	19:59497017-59503529	6512	0.000768168	2.58437	0.0421365
ENSRNOG00000043167.3	Itga9	8:127572665-127576715	4050	0.000768774	-6.53298	0.0421428
ENSRNOG00000015969.7	Rpf1	2:252368328-252370074	676	0.000780173	-5.6913	0.042713
ENSRNOG00000018057.7	Mrpl2	9:16643618-16645311	719	0.000781931	-3.58173	0.0427546
ENSRNOG00000020420.6	Pklr	2:188452399-188460724	5633	0.000784462	-2.81529	0.0428656
ENSRNOG00000018233.6	Gas6	16:81213358-81243839	2625	0.000786643	2.65692	0.0429573
ENSRNOG00000015591.5	Cndp2	18:81521958-81522746	788	0.000789682	-6.36576	0.0430958
ENSRNOG00000009882.7	Ppp3ca	2:242183854-242186862	3008	0.000790581	-3.31643	0.0431119
ENSRNOG00000011201.4	Cmtm8	8:122848285-122855385	867	0.00079134	-4.54683	0.0431119
ENSRNOG00000019522.7	Ciao3	10:15151851-15153008	1157	0.000791565	-5.16912	0.0431119
ENSRNOG00000003747.6	Get3	19:26133026-26134298	741	0.000791991	-6.07421	0.0431119
ENSRNOG00000011661.5	Hnrnph2	X:105419046-105423531	2318	0.000792505	-4.40612	0.0431125
ENSRNOG00000057626.1	Kif1b	5:165946107-165946660	553	0.000796007	-10.9173	0.0432755
ENSRNOG00000014575.5	Rtca	2:219537205-219542654	556	0.000797708	-5.09638	0.0433205
ENSRNOG00000019700.9	Proz	16:81797068-81803776	2694	0.000797848	-4.61113	0.0433205
ENSRNOG00000004333.8	Flywch1	10:13087913-13092696	1783	0.000800665	-3.90122	0.0434184
ENSRNOG00000006924.7	Tmem125	5:137370576-137373203	2399	0.000804719	-2.50448	0.0436107
ENSRNOG00000018391.4	Cdk2ap2	1:219346361-219347728	913	0.000807459	-2.31973	0.0437209
ENSRNOG00000010584.7	Tmem123	8:5993893-5997389	2628	0.000807774	-5.62868	0.0437209
ENSRNOG00000011488.7	Sergef	1:102461320-102461700	380	0.000808663	-5.15198	0.0437409
ENSRNOG00000036662.4	Wdr45b	10:110525448-110526998	1550	0.000809165	-5.38923	0.0437409
ENSRNOG00000002408.6	Rbm47	14:43777389-43839852	4586	0.000810668	2.51237	0.0437945
ENSRNOG00000004515.4	Pes1	14:84226241-84227979	935	0.000812424	-2.95952	0.0438617
ENSRNOG00000033372.5	Klhl24	11:84609965-84633638	7730	0.000814726	3.55139	0.043937
ENSRNOG00000012106.4	Dnaja4	8:59278911-59295511	3916	0.000814845	11.7727	0.043937
ENSRNOG00000008643.6	Rars2	5:50109634-50117035	800	0.000815553	-3.39758	0.0439475
ENSRNOG00000010048.6	Dctn1	4:114891739-114896573	1451	0.000821315	-2.69573	0.0441746
ENSRNOG00000029862.5	Spc24	8:22780682-22785671	907	0.000825735	-26.9662	0.0443566
ENSRNOG00000047984.2	Mrps22	8:106603111-106609758	1884	0.000827135	-8.81384	0.0444039
ENSRNOG00000034254.4	Actb	12:13715787-13719428	1934	0.000830669	-2.13258	0.0445486
ENSRNOG00000019145.5	Kdm2a	1:219565947-219570457	3743	0.00083262	-3.27592	0.0445887
ENSRNOG00000015225.7	Gramd2b	18:51589768-51591031	1263	0.000835319	-4.5706	0.0446752
ENSRNOG00000046975.2	Sult4a1	7:124958545-124967083	1803	0.00083656	-11.6224	0.0447137
ENSRNOG00000057092.1	Slfn4	10:70411706-70417298	634	0.000837768	-9.67107	0.0447503
ENSRNOG00000058522.1	Fam214a	8:81928635-81941560	1603	0.00084273	6.79827	0.0449873
ENSRNOG00000003256.7	Ccng1	10:25903923-25906762	2540	0.000845867	-5.61329	0.0451266
ENSRNOG00000024886.4	Ext1	7:92605210-92621382	1599	0.000849934	-3.59871	0.0453048
ENSRNOG00000028216.6	Igsf5	11:36743985-36779662	1325	0.000850264	-3.72546	0.0453048
ENSRNOG00000046530.1	Zdhhc16	1:261187857-261191474	955	0.000859032	-7.43204	0.045715
ENSRNOG00000047967.2	Arhgef19	5:159772708-159774081	1373	0.000860009	-9.37131	0.0457386
ENSRNOG00000020235.8	Hnrnpl	1:87004956-87007067	1103	0.000863034	-10.6278	0.0458141
ENSRNOG00000028422.6	Rmnd5a	4:99249157-99306196	6159	0.000864698	20.3047	0.045874
ENSRNOG00000003217.3	Lgals3bp	10:107415328-107416823	1495	0.000872941	-3.55955	0.0461968
ENSRNOG00000018044.6	Phyh	17:77286724-77294025	3207	0.000877675	2.59738	0.0464186
ENSRNOG00000019710.6	Tm9sf1	15:34314644-34315562	918	0.00088025	-9.59349	0.0464974
ENSRNOG00000008373.6	Colec11	6:47857765-47880379	1207	0.000885135	-2.24392	0.0466691
ENSRNOG00000047503.2	Apoc3	8:50527382-50530679	2244	0.000885705	-3.05536	0.0466704
ENSRNOG00000003728.6	Xylt2	10:82385957-82387341	1384	0.000888057	-5.6312	0.0467548
ENSRNOG00000016201.5	Mrps9	9:49658944-49704828	1244	0.000888399	-2.65084	0.0467548
ENSRNOG00000002878.6	Afm	14:19077811-19084754	1655	0.000890317	-3.43859	0.0468156
ENSRNOG00000001203.7	Rrp1	20:10988230-10993280	1241	0.000893909	-3.01637	0.0469294
ENSRNOG00000061779.1	Man2b2	14:78957429-78964961	1498	0.000897247	-4.81658	0.047047
ENSRNOG00000009117.5	Otub2	6:127297817-127301090	2494	0.000900164	-4.42879	0.0471454
ENSRNOG00000019181.5	Synpo	18:55863009-55873202	4966	0.000902778	-5.93094	0.0472045
ENSRNOG00000017990.7	Ubap2l	2:189335113-189355288	1324	0.000903009	-3.29251	0.0472045
ENSRNOG00000020938.7	Ppp1r15a	1:101511899-101515011	2065	0.000908275	5.3454	0.0474509
ENSRNOG00000015277.7	Serf2	3:113415638-113417538	736	0.000913006	5.73942	0.0476399
ENSRNOG00000032705.4	Bcl7b	12:24543751-24548677	1409	0.000920408	-6.07798	0.0479507
ENSRNOG00000019749.7	Ube2j2	5:173384518-173387104	969	0.000921203	-2.85586	0.0479507
ENSRNOG00000000961.7	Glt1d1	12:32666058-32685702	2687	0.000921902	-5.26702	0.0479579
ENSRNOG00000020751.6	Rdm1	10:89550089-89550492	403	0.000923402	-5.22871	0.0480068
ENSRNOG00000010873.7	Pithd1	5:154322561-154323525	964	0.000924374	-4.92159	0.0480282
ENSRNOG00000024144.4	Cdipt	1:198412198-198413500	1186	0.000925571	-7.32449	0.0480592
ENSRNOG00000023334.6	Parp14	11:68133805-68137535	2730	0.000926094	-2.34046	0.0480592
ENSRNOG00000046727.2	Abcc2	1:263591720-263617491	11558	0.000927881	2.29916	0.0481228
ENSRNOG00000011661.5	Hnrnph2	X:105417639-105423533	2397	0.000939289	-3.24859	0.0486261
ENSRNOG00000020412.7	Sf3b2	1:220645671-220647109	1134	0.000942616	-10.3005	0.0487398
ENSRNOG00000018748.8	Slc16a11	10:56825291-56826479	1102	0.000942625	-4.29287	0.0487398
ENSRNOG00000000096.7	Pdzk1	2:198992237-199000472	2394	0.000947494	-2.98577	0.0489063
ENSRNOG00000004725.6	Cela1	7:142305486-142308128	753	0.000947946	5.15477	0.0489063
ENSRNOG00000017354.6	Zyx	4:71748465-71749575	1110	0.000949158	-8.85749	0.0489299
ENSRNOG00000015602.6	Cdh2	18:8145530-8148637	3107	0.000952721	-5.34663	0.049084
ENSRNOG00000016460.7	Clu	15:42659953-42665867	1313	0.000963527	-3.83101	0.0495811
