# Supplementary material for: Identification of Novel Mrna Isoforms Associated with Acute Heat Stress Response Using RNA-Sequencing Data in The Sprague-Dawley Rats
Source: Preprints.org preprint supplement (doi:10.20944/preprints202211.0380.v1), 2022-11-21
Supplement: Supplementary file 6 [file Table S6_Adrenal_novel_annotated.xlsx]

## Sheet: Title
Table S6. The novel differentially expressed transcripts (P < 0.001, FDR < 0.05 and |FC| > 2) length associated with annotated genes identified in adrenal glands under various heat stress conditions.

## Sheet: CT vs. H30
The novel differentially expressed transcripts (P < 0.001, FDR < 0.05 and |FC| > 2) length associated with annotated genes identified in adrenal glands in CT vs. H30.
Gene ID	Gene name	Position	Transcript length (bp*)	P-value	FC	FDR
ENSRNOG00000003809.7	Sat1	X:43626479-43629778	1177	3.91723e-36	638.725	1.34163e-31
ENSRNOG00000016961.4	Rps27	2:189571825-189573288	700	2.69768e-25	332.635	4.11362e-21
ENSRNOG00000008822.5	Fkbp1a	3:147042793-147043174	308	3.24458e-25	-229.037	4.16718e-21
ENSRNOG00000007766.6	Pqbp1	X:15449162-15453130	1010	2.90443e-24	195.145	2.98425e-20
ENSRNOG00000005513.7	Srsf5	6:104610978-104615304	2330	8.66807e-24	-45.8726	8.09661e-20
ENSRNOG00000052275.1	H2az2	14:86694847-86706648	305	1.28009e-22	-193.882	1.09605e-18
ENSRNOG00000020417.5	Gsk3a	1:82097391-82108581	2403	1.51545e-21	190.806	1.19776e-17
ENSRNOG00000000111.5	Coprs	16:80826657-80832023	807	3.88406e-19	-114.358	2.34753e-15
ENSRNOG00000005513.7	Srsf5	6:104611020-104615303	2029	7.16868e-19	171.342	4.09204e-15
ENSRNOG00000005615.6	Gadd45a	4:97782506-97784842	1246	7.6532e-19	110.722	4.13869e-15
ENSRNOG00000009884.6	Lgals1	7:120152756-120156294	937	1.32791e-18	-22.0445	6.20181e-15
ENSRNOG00000042884.4	Hsd3b3	2:200713453-200757361	262	4.14476e-18	-17.6436	1.78916e-14
ENSRNOG00000025940.3	Mettl9	1:190964700-191009934	1648	8.68671e-17	88.2541	3.43286e-13
ENSRNOG00000022619.6	Fth1	1:226030347-226033228	1420	6.89768e-16	12.4027	2.53115e-12
ENSRNOG00000002828.7	Tob1	10:81911713-81915728	2122	1.97253e-15	5.65936	6.75578e-12
ENSRNOG00000017418.5	Rps3	1:164440065-164441198	204	3.59841e-15	-16.2234	1.15541e-11
ENSRNOG00000021168.7	Anp32e	2:198040498-198057003	3210	4.21026e-15	-93.9158	1.3109e-11
ENSRNOG00000056038.1	Ehbp1l1	1:221061877-221066382	820	6.77973e-15	-120.263	2.04883e-11
ENSRNOG00000046889.3	Dbi	13:36147608-36156076	624	8.00374e-15	22.2917	2.34962e-11
ENSRNOG00000019453.7	Rps5	1:65660466-65664799	800	1.0067e-14	21.1585	2.87322e-11
ENSRNOG00000026605.5	Ifi27l2b	6:127336304-127337861	521	2.18166e-14	-262.81	5.89899e-11
ENSRNOG00000007392.3	Atp6v1f	4:56744512-56747656	691	3.0417e-14	-15.15	8.01357e-11
ENSRNOG00000002178.5	Mrps18c	14:10442149-10446917	342	1.33097e-13	-20.463	3.10807e-10
ENSRNOG00000059445.1	Aifm2	20:31347241-31353691	1671	1.79685e-13	-114.117	4.10272e-10
ENSRNOG00000001148.6	Rplp0	12:46790733-46794521	1862	2.06369e-13	14.3793	4.51149e-10
ENSRNOG00000003983.4	Pfdn2	13:89725833-89743957	1811	2.04258e-13	-7.64317	4.51149e-10
ENSRNOG00000015385.7	Pink1	5:156677250-156689415	2361	3.62336e-13	-114.118	7.75611e-10
ENSRNOG00000047276.2	AABR07044711.1	20:18058216-18059660	1444	5.80223e-13	6.60401	1.19233e-09
ENSRNOG00000014204.7	Pacsin3	3:80072424-80081129	1890	1.49979e-12	-5.21668	2.96346e-09
ENSRNOG00000003687.6	Rgs2	13:60845355-60849094	2064	1.95137e-12	16.6254	3.783e-09
ENSRNOG00000057078.1	Ddit4	20:29509277-29511393	1992	2.22657e-12	11.4479	4.23658e-09
ENSRNOG00000017829.5	Ssu72	5:173149882-173182721	4121	2.61585e-12	24.8298	4.88679e-09
ENSRNOG00000003743.7	Dars	13:45078703-45081563	2860	2.93456e-12	2.46034	5.28984e-09
ENSRNOG00000011718.6	C1rl	4:157122422-157123443	558	3.3933e-12	-67.7277	5.99378e-09
ENSRNOG00000016630.6	Tln1	5:59036015-59040673	1823	4.08909e-12	-63.078	6.88764e-09
ENSRNOG00000024186.4	Eef1b2	9:69955316-69956174	398	1.29579e-11	121.322	2.08032e-08
ENSRNOG00000008465.6	Tmem176b	4:78450247-78458269	1643	1.56031e-11	-4.03017	2.46645e-08
ENSRNOG00000003687.6	Rgs2	13:60845355-60849094	1820	2.29831e-11	6.5131	3.47275e-08
ENSRNOG00000015320.7	Atp5mc2	7:144263869-144269490	944	2.35739e-11	7.79381	3.5104e-08
ENSRNOG00000025587.4	Plagl1	1:7254622-7259239	4617	3.35301e-11	8.25358	4.85233e-08
ENSRNOG00000015911.7	Lrp5	1:218816825-218823702	719	4.40637e-11	182.491	6.202e-08
ENSRNOG00000016592.6	Gnai2	8:116370729-116376578	1604	7.84351e-11	19.7297	1.03321e-07
ENSRNOG00000015911.7	Lrp5	1:218844220-218883292	2595	8.58048e-11	-23.306	1.11598e-07
ENSRNOG00000004284.4	Btg1	7:37813567-37815564	1997	9.13115e-11	44.123	1.17276e-07
ENSRNOG00000049110.2	Dpm2	3:11587557-11590528	892	1.29371e-10	-10.1079	1.58245e-07
ENSRNOG00000001189.6	Sik1	20:10667166-10670976	3679	1.53644e-10	16.2164	1.83565e-07
ENSRNOG00000055257.1	Selenof	2:250600630-250634350	2160	1.69939e-10	8.75469	2.007e-07
ENSRNOG00000015277.7	Serf2	3:113415735-113417505	606	2.90421e-10	5.15637	3.35283e-07
ENSRNOG00000008338.7	Bsdc1	5:147661587-147689759	2710	2.96176e-10	-68.3038	3.38128e-07
ENSRNOG00000009437.7	Ewsr1	14:85322092-85322469	377	3.22692e-10	7.83508	3.64351e-07
ENSRNOG00000023546.5	Hspb1	12:23839256-23841162	1795	4.24746e-10	28.8611	4.59387e-07
ENSRNOG00000022234.3	mrpl24	2:187288652-187294928	1970	5.77188e-10	83.1165	6.11391e-07
ENSRNOG00000018255.6	Clptm1	1:80558030-80580693	626	8.54928e-10	-37.5625	8.96348e-07
ENSRNOG00000020644.4	Nsg2	10:15867876-15928215	2320	9.44932e-10	5.8006	9.78198e-07
ENSRNOG00000008338.7	Bsdc1	5:147675266-147689759	2103	9.82489e-10	118.716	9.99493e-07
ENSRNOG00000005482.5	Sap30bp	10:104482971-104510460	636	1.0785e-09	-16.4901	1.08641e-06
ENSRNOG00000010906.6	Ccl5	10:70739745-70744328	612	1.27492e-09	95.1668	1.25957e-06
ENSRNOG00000050519.2	Rhoa	8:117114992-117118533	3324	1.33043e-09	3.65755	1.3019e-06
ENSRNOG00000002246.5	Slc30a9	14:42461669-42520340	6775	1.41132e-09	36.9039	1.35524e-06
ENSRNOG00000014208.5	Dctn3	5:58100463-58106753	481	1.68869e-09	-9.5152	1.57736e-06
ENSRNOG00000056637.1	Abhd16a	20:5093395-5094935	783	1.80471e-09	-5.86658	1.67054e-06
ENSRNOG00000031135.6	Smarcc2	7:2898539-2904676	2182	2.0737e-09	27.6761	1.88557e-06
ENSRNOG00000058412.1	Morf4l1	8:97490400-97494975	228	2.05891e-09	-5.17066	1.88557e-06
ENSRNOG00000031216.3	AABR07055776.1	7:9974046-9978638	4386	2.29129e-09	11.739	2.06514e-06
ENSRNOG00000021882.6	Tmed9	17:9564664-9565278	459	2.39475e-09	-20.3435	2.13962e-06
ENSRNOG00000017657.5	Phf23	10:56605053-56609236	1774	2.85372e-09	-24.3713	2.5061e-06
ENSRNOG00000030449.5	Gsta4	8:85497554-85518889	899	3.53217e-09	-27.4363	3.04978e-06
ENSRNOG00000060262.1	Prps1	X:111798206-111820269	2010	3.60107e-09	-6.84858	3.08336e-06
ENSRNOG00000000989.8	Bud31	12:11232846-11239666	1041	3.84025e-09	7.47093	3.26098e-06
ENSRNOG00000021027.6	Dbp	1:101687609-101692845	4031	5.39483e-09	-10.1341	4.4348e-06
ENSRNOG00000014155.7	Spart	2:144522071-144549047	4123	5.82301e-09	-20.4507	4.74844e-06
ENSRNOG00000003476.7	Slc6a4	10:63153180-63186517	3259	6.03624e-09	7.76583	4.88355e-06
ENSRNOG00000013178.7	Cmip	19:49996685-50002898	2792	6.87557e-09	8.16672	5.51915e-06
ENSRNOG00000005183.6	Rtf1	3:111478342-111524018	1308	7.48913e-09	-65.7975	5.96506e-06
ENSRNOG00000028323.6	Dhrsx	12:18516869-18521892	3246	9.48059e-09	-7.46647	7.37963e-06
ENSRNOG00000007235.5	Atp5mc1	10:83895847-83896997	568	9.80115e-09	79.79	7.57179e-06
ENSRNOG00000053070.1	AABR07053749.2	3:124004418-124005426	1008	1.0793e-08	14.4658	8.21449e-06
ENSRNOG00000019422.4	Egr1	18:27657550-27658125	575	1.1976e-08	9.34597	8.9737e-06
ENSRNOG00000021085.8	Sf1	1:221746183-221750668	2712	1.20525e-08	93.7842	8.9737e-06
ENSRNOG00000013136.6	Oxsr1	8:127920348-128010018	4592	1.66715e-08	-52.0467	1.22354e-05
ENSRNOG00000002093.4	Tgfbr3	14:3633651-3682549	5253	1.70483e-08	-37.2119	1.23962e-05
ENSRNOG00000005698.2	Ndufa5	4:51586857-51598771	6842	1.7134e-08	22.8848	1.23962e-05
ENSRNOG00000045637.1	Rnf14	18:31443436-31448480	374	1.72524e-08	-49.7279	1.23962e-05
ENSRNOG00000012247.6	Rab7a	4:119910423-119959243	2199	2.04896e-08	-2.85957	1.45191e-05
ENSRNOG00000016957.5	Igfbp2	9:80117590-80144814	1743	2.23415e-08	-2.95071	1.57145e-05
ENSRNOG00000007478.4	Cry2	3:81314148-81344134	3994	2.29033e-08	-11.5916	1.59005e-05
ENSRNOG00000019584.6	Dlk1	6:133576359-133578665	606	2.69468e-08	2.90927	1.83359e-05
ENSRNOG00000058039.1	Acta2	1:252537487-252550419	1546	2.92612e-08	4.17003	1.96505e-05
ENSRNOG00000001297.6	Prmt2	20:13156101-13157341	344	3.10053e-08	-20.7205	2.04213e-05
ENSRNOG00000016390.5	Eef1e1	17:26784942-26787794	482	3.08783e-08	-13.3629	2.04213e-05
ENSRNOG00000022664.6	Kat7	10:83095060-83104158	2421	3.68075e-08	-23.8399	2.37855e-05
ENSRNOG00000058646.1	Zfp36l1	6:103307779-103313518	5739	3.83186e-08	3.10893	2.46073e-05
ENSRNOG00000020194.7	Hes6	9:98549526-98551452	1532	3.8716e-08	-8.17889	2.4708e-05
ENSRNOG00000043114.1	Tomm7	4:7835905-7842834	464	3.97682e-08	-3.79902	2.52228e-05
ENSRNOG00000005964.5	Nr4a3	5:63793016-63822951	4006	4.56788e-08	4.65072	2.85785e-05
ENSRNOG00000054140.1	Myl6	7:2904275-2909478	3126	4.58934e-08	3.46469	2.85785e-05
ENSRNOG00000014806.7	Pnkd	9:81566023-81568532	674	5.08196e-08	-6.07504	3.12671e-05
ENSRNOG00000003289.8	Lap3	14:70102809-70112097	1535	5.45168e-08	34.946	3.33422e-05
ENSRNOG00000004794.8	Rtn1	6:94951011-94980004	1503	5.70688e-08	49.3339	3.44924e-05
ENSRNOG00000009552.6	Serinc3	3:160017190-160031490	3329	5.81038e-08	-17.4418	3.49126e-05
ENSRNOG00000004740.7	Mmadhc	3:35783314-35801614	1711	5.92449e-08	-51.534	3.53912e-05
ENSRNOG00000013090.7	Gadd45g	17:13390585-13393415	2726	6.054e-08	12.2625	3.59559e-05
ENSRNOG00000017416.4	Ppic	18:48372038-48384654	1364	6.33697e-08	46.9262	3.69949e-05
ENSRNOG00000013751.6	Plpbp	16:69163576-69176055	2066	6.69158e-08	-9.9737	3.86262e-05
ENSRNOG00000014097.6	Psmd7	19:39639423-39646813	1691	6.9857e-08	28.893	4.00987e-05
ENSRNOG00000018091.6	Gdi2	17:70325600-70325988	388	7.21333e-08	-35.5917	4.11753e-05
ENSRNOG00000009951.5	Aif1l	3:9237939-9250629	2984	7.25563e-08	51.3905	4.11879e-05
ENSRNOG00000058470.1	Col12a1	8:87040778-87069132	3553	8.23014e-08	3.77293	4.57097e-05
ENSRNOG00000013090.7	Gadd45g	17:13390585-13393415	2247	8.36875e-08	18.874	4.58805e-05
ENSRNOG00000055277.1	LOC100362333	5:78383788-78384103	221	8.39485e-08	-7.62929	4.58805e-05
ENSRNOG00000053615.1	Mrpl50	5:64784169-64789325	1797	8.4804e-08	-10.6891	4.61028e-05
ENSRNOG00000001719.6	Psmd2	11:83934086-83944237	2827	8.75091e-08	55.2025	4.73231e-05
ENSRNOG00000050044.2	Ptp4a2	5:148050708-148061388	2579	9.08669e-08	2.1613	4.88816e-05
ENSRNOG00000054838.1	Mcrs1	7:140910416-140919340	1995	9.45782e-08	-8.67364	5.03509e-05
ENSRNOG00000045574.3	Morn3	12:38974247-38975095	583	9.64566e-08	-70.9385	5.08242e-05
ENSRNOG00000012140.7	Cep89	1:91663714-91706094	2729	1.00761e-07	-62.8824	5.28216e-05
ENSRNOG00000001611.7	Rpl24	11:47116299-47122191	1191	1.06147e-07	2.40965	5.50829e-05
ENSRNOG00000039744.5	RT1-CE4	20:4896305-4897014	356	1.15857e-07	-22.4809	5.94949e-05
ENSRNOG00000043451.4	Spp1	14:6673678-6676373	1299	1.16386e-07	149.394	5.94949e-05
ENSRNOG00000004196.7	LOC108352650	6:91455326-91456890	505	1.1821e-07	3.02548	6.01279e-05
ENSRNOG00000007793.6	Pnrc1	5:48501387-48505412	2598	1.42649e-07	3.73343	7.09123e-05
ENSRNOG00000008474.7	Acox3	14:80313202-80338242	3260	1.42863e-07	-45.1568	7.09123e-05
ENSRNOG00000008015.5	Fos	6:109300432-109303845	2135	1.65323e-07	10.3996	8.05054e-05
ENSRNOG00000024809.6	Ntmt1	3:9642999-9659630	1298	1.76216e-07	-10.985	8.54047e-05
ENSRNOG00000029549.4	Eci3	17:30563320-30573332	994	1.80719e-07	37.5033	8.67688e-05
ENSRNOG00000002093.4	Tgfbr3	14:3658653-3682553	3513	1.87931e-07	9.17674	8.98118e-05
ENSRNOG00000052113.1	Ppp1r9b	10:82815080-82816740	1660	1.93024e-07	52.071	9.18188e-05
ENSRNOG00000056427.1	AABR07007717.1	2:25564849-25569501	2211	2.34537e-07	3.7322	0.000109689
ENSRNOG00000010170.5	Tubb4b	3:2441449-2442664	1215	2.37126e-07	-18.8389	0.000110245
ENSRNOG00000006116.3	Hk2	4:113559395-113565611	2998	2.44713e-07	48.2161	0.000112875
ENSRNOG00000006331.4	Elovl5	8:85284374-85287952	2612	2.4498e-07	10.9383	0.000112875
ENSRNOG00000014311.5	Slc7a8	15:33369210-33372031	2353	2.47356e-07	13.2312	0.000113461
ENSRNOG00000015408.5	Vil1	9:81711630-81717621	1324	2.51909e-07	13.0877	0.000115036
ENSRNOG00000059500.1	Cdkn1c	1:216661062-216663771	1935	2.63829e-07	-2.68453	0.000119947
ENSRNOG00000050786.2	AC103024.2	10:34316836-34317161	325	2.9318e-07	-17.9415	0.000132703
ENSRNOG00000058882.1	Emd	X:156452816-156456035	1477	3.15515e-07	5.15676	0.00014095
ENSRNOG00000006604.3	Thy1	8:48382109-48387271	1675	3.20404e-07	3.78762	0.000142514
ENSRNOG00000005413.5	Creb3l1	3:80892432-80901803	1859	3.42859e-07	15.3646	0.000149249
ENSRNOG00000016873.6	Msrb2	17:86066829-86078704	301	3.37304e-07	-31.0198	0.000149249
ENSRNOG00000017977.4	Smpd1	1:170383598-170387527	2395	3.41357e-07	-23.6025	0.000149249
ENSRNOG00000042825.2	Cd300le	10:103581122-103590698	1083	3.39277e-07	43.4153	0.000149249
ENSRNOG00000018403.7	Atg4b	9:100900698-100920301	3054	3.55829e-07	25.4333	0.000152336
ENSRNOG00000053577.1	Gramd1b	8:44324065-44328062	3997	4.32927e-07	19.1373	0.000182315
ENSRNOG00000001820.7	Med21	4:180961141-180968150	821	4.42842e-07	-7.15879	0.000184966
ENSRNOG00000016552.6	Hmgcs1	2:52427470-52445187	3483	4.45743e-07	-8.38652	0.000185422
ENSRNOG00000057194.1	Tars2	2:197860946-197861573	627	4.62292e-07	-7.41561	0.000190906
ENSRNOG00000016936.5	Nadk	5:173013611-173015505	1894	4.67924e-07	19.3281	0.000192313
ENSRNOG00000018279.7	Sfxn1	17:11045760-11048576	2105	5.53731e-07	29.0953	0.000221381
ENSRNOG00000014322.7	Kazn	5:160673009-160675590	2581	5.63099e-07	42.8172	0.000224253
ENSRNOG00000008749.7	Col5a1	3:6570885-6581348	2940	5.88574e-07	4.3643	0.000233493
ENSRNOG00000017801.7	Atf4	7:121480396-121482780	1735	5.95358e-07	7.02424	0.000235276
ENSRNOG00000008283.7	B4galt5	3:164050350-164096090	598	6.00089e-07	-8.37875	0.000235336
ENSRNOG00000021117.7	Rps6ka4	1:222087325-222098320	3140	6.20781e-07	-9.5653	0.000242525
ENSRNOG00000003084.5	Parp1	13:98881441-98889740	1709	6.55861e-07	50.03	0.000255259
ENSRNOG00000017843.6	Polr3k	3:177374636-177379008	1140	6.62067e-07	-2.98043	0.000256702
ENSRNOG00000013493.6	Psma4	8:59532388-59540166	1438	6.71995e-07	7.88776	0.000259572
ENSRNOG00000006976.5	Med6	6:105302546-105313048	1002	7.3758e-07	42.9885	0.000283839
ENSRNOG00000001820.7	Med21	4:180961141-180968155	826	7.64853e-07	37.788	0.000292145
ENSRNOG00000036852.3	Pcbp2	7:144092662-144102133	2162	8.12696e-07	6.49952	0.00030927
ENSRNOG00000039528.3	Fam32a	16:19304519-19308896	2059	8.3209e-07	-2.25138	0.000314322
ENSRNOG00000015911.7	Lrp5	1:218837922-218864158	2194	8.424e-07	-3.68033	0.000317051
ENSRNOG00000010434.4	Dync1li1	8:122772718-122778013	1839	9.1899e-07	21.0971	0.000344615
ENSRNOG00000005576.5	Rpia	4:98568027-98593679	1827	9.76884e-07	-53.3974	0.00036122
ENSRNOG00000018137.4	Tubgcp2	1:212332764-212338887	3344	9.9597e-07	27.3436	0.000365478
ENSRNOG00000020298.6	Bag3	1:199959828-199965191	1795	9.93583e-07	15.6379	0.000365478
ENSRNOG00000009845.3	Acadm	2:260124329-260127616	1152	1.06843e-06	10.0918	0.000389288
ENSRNOG00000020086.6	Aar2	3:152635208-152649626	2820	1.11897e-06	43.2222	0.000403411
ENSRNOG00000049497.2	Eif6	3:151356866-151363238	1348	1.11563e-06	-3.68146	0.000403411
ENSRNOG00000003689.6	Nono	X:71325148-71342229	2356	1.12878e-06	38.5159	0.000405524
ENSRNOG00000007823.5	Hoxb6	10:84147835-84149602	677	1.14278e-06	2.78126	0.00040695
ENSRNOG00000012956.6	Tgm2	3:154597161-154600931	2007	1.14463e-06	39.4655	0.00040695
ENSRNOG00000018730.7	Nectin2	1:80631172-80650320	2300	1.1582e-06	34.4935	0.000410354
ENSRNOG00000013009.2	Ldha	1:102904659-102909815	1502	1.16273e-06	-8.16454	0.000410545
ENSRNOG00000003977.5	Dusp1	10:16970577-16973424	2250	1.174e-06	5.61484	0.000413103
ENSRNOG00000009244.7	Abhd4	15:32899873-32910329	5760	1.28528e-06	16.115	0.000448169
ENSRNOG00000019456.6	Kars	19:44212155-44231204	2239	1.28674e-06	-6.85003	0.000448169
ENSRNOG00000014079.7	Stat1	9:54287540-54328360	4487	1.30938e-06	-6.20318	0.000451232
ENSRNOG00000019811.5	LOC100362432	16:8349644-8350675	1031	1.34277e-06	-9.39185	0.000456857
ENSRNOG00000060307.1	Ten1	10:105073089-105095094	861	1.34281e-06	24.7012	0.000456857
ENSRNOG00000002461.7	Nid1	17:90576260-90630887	6476	1.52411e-06	30.7015	0.000511763
ENSRNOG00000000989.8	Bud31	12:11232962-11239666	925	1.57257e-06	-7.3528	0.000525895
ENSRNOG00000013461.7	Ralbp1	9:113594469-113598551	1007	1.57644e-06	-40.782	0.000525895
ENSRNOG00000011718.6	C1rl	4:157122051-157123679	1165	1.59452e-06	20.6618	0.000529317
ENSRNOG00000050006.1	Agtr2	X:119389546-119393909	3039	1.597e-06	3.2004	0.000529317
ENSRNOG00000001719.6	Psmd2	11:83934086-83944776	2959	1.65083e-06	-11.9758	0.000545401
ENSRNOG00000043451.4	Spp1	14:6673678-6674718	1040	1.70865e-06	67.3216	0.000559111
ENSRNOG00000008706.6	Tbx3	12:42479516-42493376	4855	1.72885e-06	13.953	0.000563925
ENSRNOG00000017466.6	Kif5b	17:54206965-54219258	3817	1.74606e-06	11.865	0.000567735
ENSRNOG00000011414.5	Psmc3	3:79879621-79882324	890	1.75308e-06	21.2459	0.00056822
ENSRNOG00000046057.2	Pnmt	10:86340027-86344445	3754	1.87381e-06	3.88848	0.000601656
ENSRNOG00000042884.4	Hsd3b3	2:200713244-200757361	648	2.03171e-06	2.7934	0.000648306
ENSRNOG00000012880.7	Tti1	3:154463096-154506909	1516	2.23799e-06	19.38	0.000704152
ENSRNOG00000036852.3	Pcbp2	7:144092662-144102026	2055	2.2414e-06	-91.5488	0.000704152
ENSRNOG00000014183.5	Gnaq	1:233561450-233627676	5847	2.32364e-06	7.12289	0.000723484
ENSRNOG00000025940.3	Mettl9	1:190964700-191009934	1645	2.45086e-06	29.6979	0.000758495
ENSRNOG00000019620.7	Pmf1	2:187751775-187771896	1173	2.46285e-06	-36.2518	0.000759918
ENSRNOG00000054344.1	Ier2	19:25774142-25775659	1517	2.69926e-06	2.56975	0.000830371
ENSRNOG00000020763.8	Snrnp70	1:101371724-101374296	2572	2.74637e-06	-2.27953	0.000840773
ENSRNOG00000000665.7	Pitpnb	12:51313630-51341729	355	2.76064e-06	-3.95982	0.000841692
ENSRNOG00000000428.6	Cyp21a1	20:4486218-4489347	2096	2.78717e-06	-2.50355	0.000844767
ENSRNOG00000025806.4	Prr3	20:3307214-3309785	318	2.78062e-06	-34.9016	0.000844767
ENSRNOG00000000521.4	Cdkn1a	20:6351457-6358864	1933	2.82873e-06	4.8044	0.000854842
ENSRNOG00000013408.5	Npas2	9:46078257-46082065	1978	2.84866e-06	35.6681	0.000858341
ENSRNOG00000008706.6	Tbx3	12:42479517-42493269	4747	2.9187e-06	-3.97493	0.000871568
ENSRNOG00000010029.6	Ubald2	10:105392750-105397702	1652	2.91084e-06	17.389	0.000871568
ENSRNOG00000037352.3	RGD1562747	8:69484173-69489243	3174	2.9318e-06	10.5128	0.000871568
ENSRNOG00000031167.4	AABR07054319.1	3:147611936-147615859	3923	2.97687e-06	12.2909	0.000876412
ENSRNOG00000028155.6	Dnaaf2	6:91480789-91490366	3650	2.99142e-06	7.97123	0.00087818
ENSRNOG00000000411.6	Nus1	20:33556948-33584012	3749	3.06011e-06	-7.47314	0.000890708
ENSRNOG00000057078.1	Ddit4	20:29509277-29511393	1742	3.05907e-06	11.1936	0.000890708
ENSRNOG00000012880.7	Tti1	3:154463101-154506909	1511	3.08805e-06	-14.7387	0.000896303
ENSRNOG00000007114.6	Psma6	6:76187996-76205614	1234	3.19236e-06	-2.14238	0.000918791
ENSRNOG00000031092.6	Rock1	18:1273389-1277960	2178	3.37504e-06	6.47216	0.000965957
ENSRNOG00000016961.4	Rps27	2:189572290-189573386	648	3.53362e-06	-7.7994	0.00100574
ENSRNOG00000017871.7	Sidt2	8:50230338-50241408	3991	3.63287e-06	-5.69198	0.00102573
ENSRNOG00000014454.5	Ap1m1	16:19288285-19303944	2120	3.66378e-06	-3.69164	0.00103136
ENSRNOG00000017447.5	Eif2s2	3:150406348-150412261	492	3.82391e-06	-6.66311	0.00107057
ENSRNOG00000009263.8	Ifi27	6:127327603-127334432	3006	3.98774e-06	-134.282	0.00111039
ENSRNOG00000058386.1	Golt1b	4:176606648-176619728	2898	3.97881e-06	9.30295	0.00111039
ENSRNOG00000020345.6	Slc25a42	16:20962154-20985231	2883	4.03109e-06	-6.8447	0.00111942
ENSRNOG00000030712.6	RT1-A2	20:5375101-5377561	1384	4.08266e-06	-8.94453	0.00113069
ENSRNOG00000002452.6	Txndc11	10:4578433-4635953	3108	4.15398e-06	-34.8023	0.00114735
ENSRNOG00000002394.6	Tpr	13:67664613-67672827	1185	4.17228e-06	20.6616	0.00114931
ENSRNOG00000017084.3	Hsd11b2	19:37476047-37481331	1903	4.21701e-06	-5.40111	0.00115853
ENSRNOG00000026504.5	Fam114a1	14:44941680-44943286	1606	4.26847e-06	34.2011	0.00116643
ENSRNOG00000007607.4	Nr4a1	7:142912205-142921650	4820	4.33764e-06	5.69726	0.00118218
ENSRNOG00000020678.5	Ifi35	10:89358347-89366755	1228	4.37536e-06	45.1209	0.00118782
ENSRNOG00000056038.1	Ehbp1l1	1:221061874-221066382	823	4.39985e-06	9.18576	0.00118967
ENSRNOG00000003220.7	H3f3b	13:99089140-99092077	2937	4.75567e-06	2.44382	0.00126918
ENSRNOG00000047179.3	Aplp2	8:32297874-32301475	2311	4.793e-06	15.7778	0.00127583
ENSRNOG00000014090.3	Retsat	4:100465169-100474331	2253	4.91405e-06	-14.7905	0.00130131
ENSRNOG00000017829.5	Ssu72	5:173149615-173154575	4960	5.03342e-06	7.55158	0.00132609
ENSRNOG00000002956.7	Stim2	14:59197945-59207465	2516	5.1748e-06	20.1552	0.00135985
ENSRNOG00000018109.4	Clic4	5:153565420-153625870	4479	5.30473e-06	2.83965	0.0013869
ENSRNOG00000020869.6	mrpl9	2:195684209-195691581	4072	5.35612e-06	9.79332	0.00139678
ENSRNOG00000003977.5	Dusp1	10:16970577-16973424	2363	5.46138e-06	4.4324	0.00141347
ENSRNOG00000008672.7	Chmp5	5:57267232-57284461	1412	5.4556e-06	-3.41367	0.00141347
ENSRNOG00000012124.7	Trappc13	2:34223351-34234015	1005	5.67176e-06	42.5616	0.00145691
ENSRNOG00000011705.7	Stmn2	2:95424247-95472115	2066	5.72338e-06	7.27343	0.0014665
ENSRNOG00000030213.6	Vps13c	8:73830216-73845074	2661	5.76203e-06	16.7315	0.00147273
ENSRNOG00000013255.6	Dnajc8	5:150725653-150743732	1414	5.88089e-06	-4.56771	0.00149567
ENSRNOG00000019868.7	Psma5	2:211050333-211073714	1035	6.04446e-06	-3.67262	0.00153347
ENSRNOG00000020452.7	Nsmce4a	1:201096032-201101117	639	6.1388e-06	-10.5825	0.00155357
ENSRNOG00000038218.3	Ndufc1	2:140458589-140464890	3042	6.21182e-06	6.24413	0.00156819
ENSRNOG00000004726.7	Mapkapk2	13:47784952-47831110	2734	6.33556e-06	7.00541	0.00158772
ENSRNOG00000031135.6	Smarcc2	7:2875605-2904676	4001	6.35321e-06	33.2595	0.00158827
ENSRNOG00000001114.5	Wipi2	12:13966917-13973854	3620	6.42345e-06	18.3934	0.00159562
ENSRNOG00000020340.7	Brd8	18:27398687-27422885	3434	6.41951e-06	-3.95346	0.00159562
ENSRNOG00000043451.4	Spp1	14:6673558-6676373	1419	6.54729e-06	80.7854	0.00161712
ENSRNOG00000010813.6	Tspan14	16:17591718-17596912	1821	6.57775e-06	16.8273	0.00162074
ENSRNOG00000012550.6	Uqcrh	5:134919031-134927441	765	6.71995e-06	-2.13016	0.00164788
ENSRNOG00000018164.6	Spcs2	1:164839322-164849774	251	6.70859e-06	-33.0467	0.00164788
ENSRNOG00000015753.6	Epn1	1:72294151-72297186	1167	6.76537e-06	57.1782	0.00165507
ENSRNOG00000017227.7	Ppme1	1:165335144-165340269	1379	7.37608e-06	10.6342	0.00180018
ENSRNOG00000031135.6	Smarcc2	7:2884285-2904676	3016	7.45126e-06	8.65469	0.00181422
ENSRNOG00000019584.6	Dlk1	6:133581239-133583921	1088	7.53677e-06	3.52521	0.0018307
ENSRNOG00000013443.8	Tm9sf3	1:260464937-260472448	4585	7.96625e-06	46.3255	0.0019214
ENSRNOG00000007650.5	Cd63	7:3331977-3335589	1680	8.13108e-06	-2.6628	0.00195199
ENSRNOG00000049560.2	Glul	13:71331025-71340229	2511	8.29832e-06	-4.9275	0.0019875
ENSRNOG00000019666.7	Ubxn1	1:225067980-225072012	1160	8.38971e-06	108.1	0.00200471
ENSRNOG00000000247.6	Mfsd11	10:105809774-105816008	2189	8.84595e-06	21.0066	0.00209425
ENSRNOG00000005195.6	Cst3	3:143219665-143223623	813	8.80917e-06	3.93393	0.00209425
ENSRNOG00000009997.5	Erap1	2:1410915-1415237	283	8.84462e-06	-12.3555	0.00209425
ENSRNOG00000036814.4	Atp6v0a1	10:88948347-88967748	1977	9.08745e-06	22.4445	0.00214155
ENSRNOG00000004466.4	Fam210b	3:170354048-170364448	3620	9.11485e-06	-2.58867	0.00214249
ENSRNOG00000043328.3	Chmp2a	1:65540198-65543707	1908	9.13314e-06	28.9531	0.00214249
ENSRNOG00000005413.5	Creb3l1	3:80892432-80894724	2128	9.22454e-06	7.85677	0.002159
ENSRNOG00000019253.8	Bcar1	19:43932211-43934784	1346	9.33995e-06	15.6219	0.00217545
ENSRNOG00000028323.6	Dhrsx	12:18516863-18521892	1772	9.47057e-06	16.3102	0.00219657
ENSRNOG00000018184.8	Tpm1	8:72814739-72836352	1857	1.00843e-05	-11.1079	0.0023284
ENSRNOG00000000869.7	Arhgef6	X:159722041-159724244	2203	1.02799e-05	-5.67633	0.00235797
ENSRNOG00000013408.5	Npas2	9:46048014-46082065	2863	1.02461e-05	13.9326	0.00235797
ENSRNOG00000016885.6	Klf6	17:67895916-67899162	3246	1.0292e-05	21.5936	0.00235797
ENSRNOG00000005388.6	Rassf3	7:63513826-63518935	2875	1.04016e-05	23.3177	0.00236973
ENSRNOG00000021269.5	Chgb	3:125428259-125441993	2932	1.03941e-05	6.6656	0.00236973
ENSRNOG00000020417.5	Gsk3a	1:82097391-82098521	1130	1.0645e-05	17.8713	0.00240914
ENSRNOG00000007160.7	Kat14	3:138504213-138509507	920	1.06938e-05	-29.7944	0.00241487
ENSRNOG00000006641.8	Dbh	3:5719047-5721243	1540	1.15086e-05	22.336	0.00257623
ENSRNOG00000049683.2	Sh3gl1	9:11031773-11054672	2196	1.14712e-05	-14.0023	0.00257623
ENSRNOG00000025806.4	Prr3	20:3307203-3309785	329	1.20718e-05	10.2533	0.00267623
ENSRNOG00000060448.1	Hand2	16:36373326-36374608	1282	1.20856e-05	5.31855	0.00267623
ENSRNOG00000005346.7	Tmem128	14:77270792-77279831	1111	1.23932e-05	4.52776	0.00273258
ENSRNOG00000003086.7	Cenpv	10:48846104-48847414	1310	1.24456e-05	-2.99092	0.00273825
ENSRNOG00000012404.6	Thrsp	1:162381191-162385869	1587	1.25118e-05	-8.43251	0.00274694
ENSRNOG00000013836.8	Arhgap17	1:193239035-193246781	1455	1.31293e-05	14.6373	0.00285807
ENSRNOG00000014322.7	Kazn	5:160673009-160691394	3234	1.33251e-05	18.0605	0.00289456
ENSRNOG00000020029.5	Mcrip2	10:15229544-15235848	6093	1.36329e-05	-5.52623	0.00294896
ENSRNOG00000010234.7	Nsmaf	5:19499420-19511519	1061	1.37033e-05	12.2126	0.00295795
ENSRNOG00000004517.8	Igf1	7:28412166-28417731	531	1.38028e-05	-12.6792	0.00297318
ENSRNOG00000011891.6	Atp6v1b2	16:22337366-22350235	503	1.39406e-05	-13.023	0.00299659
ENSRNOG00000031171.5	Wdr46	20:5447859-5453041	1582	1.43301e-05	16.6397	0.00306749
ENSRNOG00000015869.5	Pccb	8:109368053-109371819	1553	1.46834e-05	19.5587	0.00312359
ENSRNOG00000021475.6	Ldah	6:33418594-33459939	21218	1.5153e-05	17.4899	0.00321681
ENSRNOG00000021380.5	Fads6	10:103827362-103847387	7229	1.52095e-05	18.7884	0.00322216
ENSRNOG00000015380.6	Jup	10:88279631-88284054	2018	1.53684e-05	12.8933	0.00323563
ENSRNOG00000005371.8	Klhl29	6:29178126-29181185	1445	1.55847e-05	9.70651	0.0032613
ENSRNOG00000033262.3	Reep6	7:12240054-12241710	1656	1.58257e-05	10.5083	0.00329829
ENSRNOG00000005513.7	Srsf5	6:104611017-104615304	2295	1.59866e-05	-7.89306	0.00332508
ENSRNOG00000051706.1	Tep1	15:27751179-27754253	771	1.62197e-05	12.782	0.00335996
ENSRNOG00000004474.5	Klhdc2	6:91610587-91611159	572	1.63193e-05	-6.04055	0.00336027
ENSRNOG00000009439.6	Eef1a1	8:85839787-85842187	2219	1.63077e-05	3.50012	0.00336027
ENSRNOG00000018945.4	Nutf2	19:37830862-37852310	2102	1.62545e-05	8.25161	0.00336027
ENSRNOG00000052880.1	Prph	7:140742399-140746195	1772	1.64916e-05	6.20347	0.00338895
ENSRNOG00000006615.6	Mtap	5:107712563-107758697	4774	1.67505e-05	-22.7465	0.00342398
ENSRNOG00000018123.5	Ccny	17:62328746-62358646	4678	1.6762e-05	34.8818	0.00342398
ENSRNOG00000014997.4	Igf2r	1:48254619-48264479	3138	1.72584e-05	-18.7099	0.00351817
ENSRNOG00000046667.2	Fosb	1:80214483-80217062	2579	1.72916e-05	19.7807	0.00351817
ENSRNOG00000001223.5	Pttg1ip	20:11746228-11763670	2419	1.74258e-05	6.05617	0.00353846
ENSRNOG00000011352.2	Furin	1:142185040-142189584	3176	1.75837e-05	11.5676	0.0035635
ENSRNOG00000008103.7	Mdh1	14:106377999-106393701	2286	1.78425e-05	5.44564	0.00360883
ENSRNOG00000018126.7	Abca1	5:69857418-69863209	4061	1.80963e-05	8.8858	0.00365296
ENSRNOG00000006305.5	Slc38a2	7:138088642-138091745	3103	1.83212e-05	9.78313	0.00366988
ENSRNOG00000013954.5	Alpl	5:156086485-156087665	1180	1.8387e-05	52.1553	0.00366988
ENSRNOG00000047628.2	Khsrp	9:10020066-10023671	2980	1.83944e-05	20.5968	0.00366988
ENSRNOG00000054157.1	Nadk2	2:58495885-58504935	2499	1.83263e-05	10.7733	0.00366988
ENSRNOG00000011414.5	Psmc3	3:79876937-79882329	1636	1.88336e-05	-8.75087	0.00373575
ENSRNOG00000003890.7	Nap1l1	7:54213262-54238196	4354	1.89258e-05	4.39566	0.0037468
ENSRNOG00000022392.3	Hspb8	12:45912588-45920014	1092	1.90843e-05	10.4641	0.00377092
ENSRNOG00000025209.6	Plxnd1	4:147854214-147858539	1868	1.9268e-05	7.45483	0.00379989
ENSRNOG00000008830.7	Nfe2l1	10:84682447-84690709	7574	1.94762e-05	39.1423	0.00382628
ENSRNOG00000001709.7	Ap2m1	11:84041027-84043524	1420	1.973e-05	8.00311	0.00386874
ENSRNOG00000001211.4	Gatd3a	20:11244139-11245375	618	2.01635e-05	-9.37458	0.00394098
ENSRNOG00000014205.2	Klf2	16:19222420-19225122	1807	2.01751e-05	2.55223	0.00394098
ENSRNOG00000000902.7	Hsph1	12:6322203-6335463	3090	2.05427e-05	10.2099	0.00399758
ENSRNOG00000021181.5	Sf3b4	2:198316806-198317593	787	2.07148e-05	-5.41518	0.00401635
ENSRNOG00000023095.5	Npepps	10:85140362-85148355	1726	2.09834e-05	12.4141	0.00406027
ENSRNOG00000001072.5	Cers4	12:4436326-4474300	6729	2.12816e-05	9.65742	0.00410252
ENSRNOG00000018788.6	Btbd2	7:11942158-11943800	1539	2.16094e-05	29.9182	0.00415791
ENSRNOG00000010873.7	Pithd1	5:154329290-154333104	2950	2.18999e-05	6.02726	0.00420522
ENSRNOG00000015095.7	Spryd7	15:41870761-41890795	1451	2.19372e-05	35.8516	0.00420522
ENSRNOG00000000557.5	Ppa1	20:31298268-31310681	2632	2.22936e-05	4.39452	0.00425008
ENSRNOG00000030124.5	Ptpn11	12:40949265-40956004	3768	2.22952e-05	-4.21132	0.00425008
ENSRNOG00000057710.1	Ccnd2	4:159670364-159675767	5403	2.227e-05	12.0032	0.00425008
ENSRNOG00000019036.6	Ldhd	19:43833750-43841801	6061	2.27887e-05	3.6387	0.00432009
ENSRNOG00000046741.3	Itsn2	6:30129212-30135617	3583	2.35925e-05	12.6744	0.00445603
ENSRNOG00000006615.6	Mtap	5:107712563-107758711	4788	2.41901e-05	12.7344	0.00455216
ENSRNOG00000001136.6	Pebp1	12:45026885-45032553	2504	2.43239e-05	4.03123	0.00456898
ENSRNOG00000003526.8	Sytl4	X:104763895-104771009	4264	2.47138e-05	-7.19768	0.00463375
ENSRNOG00000009225.7	Copz2	10:84719601-84731882	804	2.50926e-05	6.59158	0.00468646
ENSRNOG00000018358.4	Nt5dc2	16:7220433-7221477	539	2.52892e-05	-31.4047	0.00469877
ENSRNOG00000020938.7	Ppp1r15a	1:101511891-101515022	1239	2.59204e-05	7.43825	0.00480735
ENSRNOG00000003714.6	Clk4	10:36716427-36734126	4380	2.61127e-05	-4.82467	0.00483429
ENSRNOG00000018774.5	LOC100911847	18:56042440-56047389	3148	2.67574e-05	-3.89712	0.00493887
ENSRNOG00000009094.4	Nudt4	7:36643816-36660340	3224	2.71597e-05	4.83406	0.00498952
ENSRNOG00000010633.3	Acsl1	16:48937179-48939297	2118	2.72049e-05	12.5057	0.00498952
ENSRNOG00000006816.7	Ubr5	7:76787562-76802161	3308	2.73463e-05	11.9785	0.00499961
ENSRNOG00000013794.4	Rbp1	8:106449220-106470845	799	2.76382e-05	4.83234	0.00502703
ENSRNOG00000019105.7	Dpp8	8:70514419-70576180	13955	2.76431e-05	12.3209	0.00502703
ENSRNOG00000007611.5	Hoxb7	10:84137696-84138642	946	2.78523e-05	-7.50982	0.00504379
ENSRNOG00000051952.1	Tes	4:44352687-44360413	2082	2.78825e-05	15.1316	0.00504379
ENSRNOG00000014621.7	Rab8a	16:19355038-19376908	1884	2.79601e-05	-6.53628	0.00504894
ENSRNOG00000014414.6	Qrfpr	2:122888422-122949780	6896	2.87147e-05	-4.44711	0.0051761
ENSRNOG00000005406.7	Clint1	10:31003052-31007820	2340	2.97718e-05	6.40861	0.00535726
ENSRNOG00000003975.6	Pfn1	10:57272998-57278346	4827	3.00165e-05	-4.8209	0.00539185
ENSRNOG00000059459.1	AABR07047256.1	5:25339433-25340989	240	3.05203e-05	7.00607	0.00547277
ENSRNOG00000046493.1	Pnpo	10:84875207-84876130	806	3.07577e-05	3.86177	0.00550574
ENSRNOG00000018319.7	Pisd	14:83345709-83347855	1638	3.09432e-05	13.6527	0.00552931
ENSRNOG00000028642.7	#N/A	1:73731238-73733802	377	3.09982e-05	-4.02595	0.00552952
ENSRNOG00000002373.8	Akap1	10:76151017-76184115	3805	3.11993e-05	-6.91802	0.00555574
ENSRNOG00000001813.8	Dnm1l	11:88830967-88880211	2491	3.14233e-05	-16.1602	0.0055667
ENSRNOG00000003127.4	Spryd4	7:2621960-2623809	1506	3.32504e-05	-5.29589	0.00586005
ENSRNOG00000006766.6	Laptm4b	7:72958211-72968809	1970	3.33925e-05	14.9996	0.00586981
ENSRNOG00000050585.2	Pgam1	1:261158149-261166018	2063	3.34912e-05	4.04697	0.00587227
ENSRNOG00000009845.3	Acadm	2:260124157-260137181	1552	3.38161e-05	13.8196	0.00590908
ENSRNOG00000020660.7	Cfl1	1:220872697-220876192	2513	3.40793e-05	7.74765	0.00594495
ENSRNOG00000009028.6	Rnf126	7:12825460-12828334	1305	3.61503e-05	14.0391	0.00628489
ENSRNOG00000009552.6	Serinc3	3:160017190-160026666	3010	3.63327e-05	13.1562	0.00630594
ENSRNOG00000017852.8	Nars1	18:59986342-59995767	2118	3.69278e-05	11.2789	0.00638764
ENSRNOG00000007921.8	Hnrnpm	7:18516249-18522377	2075	3.713e-05	-6.42162	0.00641182
ENSRNOG00000002828.7	Tob1	10:81911713-81915938	2332	3.74333e-05	28.1502	0.00644254
ENSRNOG00000020881.7	Frmd8	1:221213210-221215574	1820	3.78281e-05	10.0466	0.00649959
ENSRNOG00000020298.6	Bag3	1:199940784-199965191	6369	3.78945e-05	9.05669	0.00650014
ENSRNOG00000016180.5	Pdp1	5:25577592-25584335	2572	3.81396e-05	-6.63396	0.00653128
ENSRNOG00000008106.4	Shmt2	7:70824597-70829815	2183	3.91587e-05	26.6694	0.00666139
ENSRNOG00000051682.1	Zcchc9	2:20909728-20919809	1624	3.91107e-05	46.303	0.00666139
ENSRNOG00000059500.1	Cdkn1c	1:216661062-216663726	1887	3.92894e-05	-2.49853	0.00667257
ENSRNOG00000000571.6	Psap	20:29831282-29849726	889	3.95196e-05	-9.3673	0.00670059
ENSRNOG00000049683.2	Sh3gl1	9:11031773-11055285	2068	4.00005e-05	-5.35664	0.00675982
ENSRNOG00000016047.7	Macf1	5:141039447-141061009	3092	4.07533e-05	-5.95778	0.00686446
ENSRNOG00000060154.1	Ddx23	7:140325430-140330183	1735	4.09927e-05	12.846	0.00689348
ENSRNOG00000056382.1	Snora9	14:86800350-86803425	818	4.10816e-05	-26.2054	0.00689715
ENSRNOG00000007434.8	Ube2j1	5:48285660-48292911	2982	4.12151e-05	33.8683	0.00690827
ENSRNOG00000016219.6	Vnn1	1:22614657-22622862	2323	4.13235e-05	11.0973	0.00691515
ENSRNOG00000016137.6	Rad23b	5:72103598-72142727	3891	4.19366e-05	-5.76778	0.00700038
ENSRNOG00000009205.6	Lmo4	2:250235258-250235817	559	4.22089e-05	-4.05399	0.00702898
ENSRNOG00000023509.6	Irs2	16:83842991-83848658	5667	4.24455e-05	8.42721	0.00704732
ENSRNOG00000047339.3	Pja1	X:69213643-69218598	2168	4.24562e-05	-10.2338	0.00704732
ENSRNOG00000007801.7	R3hdm2	7:70790768-70805739	2942	4.29674e-05	7.28902	0.0071092
ENSRNOG00000022500.4	Rwdd4	16:47874615-47874944	329	4.29037e-05	-26.1674	0.0071092
ENSRNOG00000006086.7	Lynx1	7:115982583-115988090	4291	4.41919e-05	5.16118	0.00725638
ENSRNOG00000020086.6	Aar2	3:152626783-152649611	3622	4.40525e-05	-5.2045	0.00725638
ENSRNOG00000042821.3	Cd59	3:94018530-94030481	3282	4.41581e-05	28.4903	0.00725638
ENSRNOG00000059720.1	Syp	X:15694698-15707436	2270	4.40247e-05	5.40541	0.00725638
ENSRNOG00000018367.6	Taldo1	1:214375277-214385891	1480	4.44285e-05	5.87151	0.00727088
ENSRNOG00000018791.6	Dnlz	3:3792885-3798736	4742	4.44399e-05	16.8095	0.00727088
ENSRNOG00000030019.4	Atp1a1	2:204003550-204032641	5597	4.47579e-05	-3.33441	0.00729966
ENSRNOG00000015018.7	Pdia3	3:113376905-113400707	3120	4.54418e-05	32.8941	0.00739945
ENSRNOG00000007387.7	Per1	10:55692752-55698076	3814	4.59808e-05	20.8397	0.00746591
ENSRNOG00000020361.7	Ip6k2	8:117589226-117599843	3568	4.59952e-05	40.5878	0.00746591
ENSRNOG00000020546.5	Lipe	1:82247909-82265516	4582	4.69401e-05	-4.28591	0.00759528
ENSRNOG00000004544.7	Ube2e3	3:65815040-65872225	2563	4.73873e-05	6.23783	0.0076549
ENSRNOG00000021168.7	Anp32e	2:198044560-198057009	2960	4.7694e-05	10.5858	0.00768098
ENSRNOG00000006751.5	Psmd6	15:12407494-12416153	1438	4.8442e-05	15.9603	0.00777706
ENSRNOG00000004628.7	Dazap2	7:142237317-142245550	4760	4.864e-05	2.93122	0.00779667
ENSRNOG00000057194.1	Tars2	2:197861114-197870908	1530	4.92686e-05	10.4809	0.00788513
ENSRNOG00000019688.8	Diaph1	18:30972205-30974998	2793	4.9959e-05	20.5677	0.00797753
ENSRNOG00000019772.5	Dnpep	9:82510012-82513808	1272	5.00012e-05	-3.84225	0.00797753
ENSRNOG00000053207.1	AABR07026125.1	16:64982381-64984767	2386	5.08488e-05	4.21057	0.00810018
ENSRNOG00000060179.1	Gpc3	X:139579264-139737203	1781	5.12251e-05	8.47252	0.0081349
ENSRNOG00000014338.6	Slc25a25	3:11442342-11476225	3349	5.14293e-05	2.75331	0.00815471
ENSRNOG00000009878.7	Crtapl1	8:122382516-122406363	743	5.16329e-05	58.511	0.00816181
ENSRNOG00000012582.5	Eif4ebp1	16:68954529-68968416	1344	5.15536e-05	-13.2844	0.00816181
ENSRNOG00000007023.6	Galm	6:2858484-2860851	1514	5.20175e-05	13.9975	0.00819738
ENSRNOG00000010882.4	Sptlc1	17:11885227-11895566	2189	5.21306e-05	23.9637	0.00820262
ENSRNOG00000007029.3	Dnaja1	5:57029342-57043002	13564	5.25279e-05	3.70682	0.0082399
ENSRNOG00000007047.7	Eps8	4:171474994-171477177	2183	5.24514e-05	13.4358	0.0082399
ENSRNOG00000051499.1	Tcf3	7:12157920-12168455	2173	5.36981e-05	12.0025	0.00841063
ENSRNOG00000004362.7	Rps6ka5	6:124557643-124567529	4045	5.41011e-05	28.2813	0.00844799
ENSRNOG00000030111.4	Cyp11b3	7:116254193-116255227	664	5.45324e-05	-14.9902	0.00848954
ENSRNOG00000027888.6	Cmss1	11:45304067-45330494	983	5.70837e-05	-5.36441	0.00884652
ENSRNOG00000004517.8	Igf1	7:28412166-28417731	345	5.7495e-05	-6.40824	0.00889261
ENSRNOG00000055319.1	Mrfap1	14:78974142-78975215	1073	5.75543e-05	6.83227	0.00889261
ENSRNOG00000012873.8	Gfm1	2:164607041-164646510	2349	5.79551e-05	16.3418	0.00893799
ENSRNOG00000020657.7	Shc1	2:188745424-188751545	999	5.80219e-05	-11.7812	0.00893799
ENSRNOG00000007682.8	Gria3	X:127814971-127829753	7445	5.81657e-05	-7.3338	0.00894672
ENSRNOG00000006302.4	Gclc	8:85089479-85097616	2646	5.88261e-05	13.8273	0.00903477
ENSRNOG00000016219.6	Vnn1	1:22614611-22619788	1818	5.92847e-05	12.0645	0.00909161
ENSRNOG00000028733.6	Prkar1b	12:17679824-17713567	1791	5.97012e-05	9.22679	0.00914184
ENSRNOG00000001890.7	Txnrd2	11:86667993-86675606	1482	6.04273e-05	3.04811	0.00923926
ENSRNOG00000020417.5	Gsk3a	1:82097493-82098519	1026	6.08675e-05	-14.2346	0.00929274
ENSRNOG00000004751.4	Jkamp	6:94842838-94850315	1596	6.26068e-05	11.7191	0.00951587
ENSRNOG00000019883.7	Pak4	1:85200682-85201722	1040	6.25377e-05	19.6011	0.00951587
ENSRNOG00000001769.7	Tnk2	11:71348716-71360655	2933	6.31531e-05	28.5198	0.00958472
ENSRNOG00000014463.5	Uri1	1:94346513-94404362	3387	6.40228e-05	-11.4267	0.00968808
ENSRNOG00000004538.5	Brd1	7:129676118-129703739	2964	6.45806e-05	-11.2907	0.00975813
ENSRNOG00000020652.4	Tgfb1	1:82489102-82497275	688	6.49573e-05	13.6812	0.00979187
ENSRNOG00000021316.4	Tmem98	10:68183411-68184289	878	6.49945e-05	18.4147	0.00979187
ENSRNOG00000008064.7	Naga	7:123562823-123568663	1630	6.60446e-05	40.0241	0.00989206
ENSRNOG00000017405.7	Raly	3:150322748-150323343	595	6.59054e-05	-7.72411	0.00989206
ENSRNOG00000019584.6	Dlk1	6:133581239-133583921	1160	6.60359e-05	3.05175	0.00989206
ENSRNOG00000023577.7	Gigyf2	9:94548530-94550806	2276	6.71872e-05	28.1623	0.0100194
ENSRNOG00000007743.7	Mgst1	4:172119304-172135503	1872	6.7506e-05	3.50478	0.0100523
ENSRNOG00000046207.1	Cbx4	10:108189821-108196022	2573	6.77215e-05	11.3092	0.0100698
ENSRNOG00000018046.6	Lgals8	17:66487456-66493969	1943	6.84916e-05	15.876	0.0101621
ENSRNOG00000017990.7	Ubap2l	2:189377380-189400328	893	6.99128e-05	-38.6765	0.0103358
ENSRNOG00000010196.5	Glb1	8:122479225-122511939	1837	7.03718e-05	8.3496	0.0103738
ENSRNOG00000014128.5	Ecsit	8:23085605-23087133	665	7.14936e-05	35.2766	0.010509
ENSRNOG00000020474.6	Pin1	8:21669122-21672923	512	7.24228e-05	-5.11334	0.0106001
ENSRNOG00000029028.5	Mknk2	7:11916002-11919342	2728	7.36099e-05	9.035	0.0107433
ENSRNOG00000003239.6	Cant1	10:107432498-107445580	2693	7.37341e-05	-8.71541	0.0107461
ENSRNOG00000019245.7	Sgf29	1:198098334-198100494	751	7.39439e-05	-5.55375	0.0107615
ENSRNOG00000019629.7	Lamp1	16:81689005-81697593	2439	7.4679e-05	8.95195	0.0108377
ENSRNOG00000015822.5	Klf13	1:124767603-124773053	5450	7.50792e-05	11.3804	0.0108651
ENSRNOG00000005513.7	Srsf5	6:104614669-104615304	524	7.55965e-05	9.83013	0.0109246
ENSRNOG00000059618.1	Scarf1	10:63662985-63668288	1319	7.58565e-05	28.6747	0.0109468
ENSRNOG00000018838.7	Paox	1:212598321-212604242	1398	7.69962e-05	31.2542	0.0110824
ENSRNOG00000019987.3	Scand1	3:152381553-152382379	826	7.70122e-05	2.38349	0.0110824
ENSRNOG00000000428.6	Cyp21a1	20:4486218-4489281	2027	7.81455e-05	16.6038	0.0111829
ENSRNOG00000021131.6	Mindy1	2:196457104-196462649	1171	7.81321e-05	-4.43798	0.0111829
ENSRNOG00000016346.8	Prkcd	16:6655039-6663941	1944	7.85894e-05	8.82455	0.0112307
ENSRNOG00000037909.2	Ppm1f	11:88336738-88343707	568	7.89504e-05	-5.22115	0.0112667
ENSRNOG00000005323.8_4	#N/A	6:99152227-99153537	1310	7.95307e-05	12.5993	0.0113193
ENSRNOG00000003954.8	Il2rg	X:71165365-71169048	1608	8.02232e-05	-23.5275	0.011373
ENSRNOG00000005291.6	Slc38a1	7:137970554-138021343	7143	8.0249e-05	-16.6303	0.011373
ENSRNOG00000009910.6	Swap70	1:174862677-174924155	3973	8.00554e-05	-5.57741	0.011373
ENSRNOG00000004686.6	Spop	10:83231219-83231615	396	8.08866e-05	-4.62646	0.0114318
ENSRNOG00000012106.4	Dnaja4	8:59291240-59295639	4299	8.1186e-05	3.08971	0.0114584
ENSRNOG00000015999.6	Cirbp	7:12400334-12405061	2436	8.14242e-05	-2.89197	0.0114762
ENSRNOG00000043167.3	Itga9	8:127511920-127576715	4681	8.182e-05	7.14631	0.0115162
ENSRNOG00000007319.7	Trib3	3:147813461-147814853	1392	8.36554e-05	7.90385	0.0117424
ENSRNOG00000005600.7	Nr4a2	3:43111239-43114725	2178	8.39341e-05	11.7255	0.0117613
ENSRNOG00000013179.5	Tinagl1	5:148382463-148385014	1411	8.4375e-05	12.8235	0.0117613
ENSRNOG00000003338.6	Pmp22	10:49541050-49568584	1815	8.46027e-05	3.48187	0.0117629
ENSRNOG00000004327.8	Ddc	14:91905918-91989332	5133	8.5539e-05	5.39207	0.0118609
ENSRNOG00000015237.7	Gle1	3:8498110-8507219	969	8.66835e-05	-26.2939	0.0119873
ENSRNOG00000010609.8	Abcf2	4:7133581-7135773	1159	8.7217e-05	20.2209	0.0120448
ENSRNOG00000028323.6	Dhrsx	12:18516869-18521892	1721	8.8157e-05	9.76408	0.0121583
ENSRNOG00000025053.5	Lrp1	7:70846273-70854207	3413	8.84327e-05	7.97979	0.01218
ENSRNOG00000003714.6	Clk4	10:36720631-36734126	2512	8.85548e-05	5.24012	0.0121805
ENSRNOG00000002721.7	Ndufb4	11:65960082-65966899	502	8.99644e-05	-6.10636	0.0123578
ENSRNOG00000015869.5	Pccb	8:109368093-109419139	2871	9.00846e-05	-3.78165	0.0123578
ENSRNOG00000019834.6	Hsp90ab1	9:17817703-17823243	2930	9.05968e-05	3.00295	0.0124115
ENSRNOG00000033496.5	Igdcc4	8:70592007-70627884	7008	9.27145e-05	-6.77102	0.012651
ENSRNOG00000004554.6	Dcn	7:38745007-38782323	1833	9.33245e-05	2.56254	0.0127174
ENSRNOG00000012601.7	Leprotl1	16:61758905-61771584	2619	9.34604e-05	-8.22274	0.012719
ENSRNOG00000031420.2	Hyal2	8:116325183-116328979	1983	9.36519e-05	-22.8942	0.0127282
ENSRNOG00000001249.8	Col6a1	20:12674728-12676370	1471	9.38546e-05	4.84852	0.0127358
ENSRNOG00000003821.6	Rptor	10:109056836-109059336	2500	9.39557e-05	12.5275	0.0127358
ENSRNOG00000033433.4	Csrnp1	8:128659867-128672355	2971	9.4251e-05	26.2391	0.012759
ENSRNOG00000026605.5	Ifi27l2b	6:127336233-127337861	592	9.46499e-05	4.49885	0.0127962
ENSRNOG00000046502.1	Lonp1	9:10428752-10441557	4089	9.7511e-05	-3.76949	0.0131656
ENSRNOG00000003524.4	Lrrc59	10:82352338-82367047	2853	9.78795e-05	-4.39955	0.0131981
ENSRNOG00000016269.7	Rpl7l1	9:16512722-16515097	301	9.8734e-05	14.5811	0.0132958
ENSRNOG00000014857.6	RGD1560065	2:251818910-251824784	1330	9.9186e-05	-21.5229	0.0133392
ENSRNOG00000002911.5	Alb	14:19176273-19183355	1158	9.96072e-05	-11.6587	0.0133784
ENSRNOG00000018704.5	Nolc1	1:265833144-265839820	3289	0.000100221	23.5923	0.0134432
ENSRNOG00000029682.5	Clic1	20:5042925-5049166	696	0.000102382	15.0812	0.0137151
ENSRNOG00000004060.7	Calm1	6:124221470-124227770	3887	0.000103116	-7.57266	0.0137955
ENSRNOG00000014322.7	Kazn	5:160673020-160691394	3223	0.000103927	-12.162	0.0138701
ENSRNOG00000014414.6	Qrfpr	2:122888422-122949780	9126	0.000103962	-4.37037	0.0138701
ENSRNOG00000061056.1	AABR07042514.3	X:158581630-158582269	639	0.000104078	2.63452	0.0138701
ENSRNOG00000020179.7	Nt5c2	1:266673949-266732029	526	0.000105435	-11.302	0.0140145
ENSRNOG00000016873.6	Msrb2	17:86145897-86148137	979	0.000106784	12.5861	0.0141755
ENSRNOG00000006751.5	Psmd6	15:12407508-12416152	1423	0.000107626	-4.12243	0.0142689
ENSRNOG00000024372.5	Cwf19l2	6:18970558-19031189	2622	0.000109378	-10.1355	0.0144486
ENSRNOG00000055579.1	Tmbim6	7:141067332-141070270	1699	0.000109404	24.8353	0.0144486
ENSRNOG00000057464.1	Fmr1	X:154684831-154686047	1216	0.000109269	-27.3024	0.0144486
ENSRNOG00000002255.8	Fam162a	11:67618509-67645311	1411	0.000111408	2.75914	0.0146756
ENSRNOG00000046484.1	Ccdc160	X:140169583-140177248	1647	0.000111781	-2.53151	0.014687
ENSRNOG00000053269.1	Tmem106c	7:139449749-139450596	761	0.0001136	7.5795	0.014907
ENSRNOG00000018358.4	Nt5dc2	16:7220433-7221714	696	0.000114131	3.57353	0.0149576
ENSRNOG00000047339.3	Pja1	X:69213626-69218598	2725	0.000115127	9.34534	0.0150689
ENSRNOG00000015434.7	Midn	7:12414302-12424529	3805	0.000117834	2.71167	0.0154036
ENSRNOG00000026124.5	Id3	5:154489507-154491177	1555	0.000118467	3.59642	0.0154667
ENSRNOG00000030291.4	AC095947.1	10:70100660-70101169	509	0.000118698	-2.07245	0.0154771
ENSRNOG00000001456.5	Nup153	17:18406766-18412276	3177	0.000119848	27.0258	0.0156073
ENSRNOG00000015450.5	Ppp1r16a	7:117733949-117757249	2680	0.000120381	-5.85086	0.0156569
ENSRNOG00000001269.6	Ppp1cc	12:39864297-39882064	2607	0.000121005	-2.92295	0.0157083
ENSRNOG00000029784.4	Pak1	1:162874997-162883355	1716	0.000121083	10.5162	0.0157083
ENSRNOG00000020289.6	Akt1s1	1:100850012-100851960	1124	0.000121363	7.49696	0.0157248
ENSRNOG00000036678.4	Aspscr1	10:109884188-109889395	510	0.000122657	7.95654	0.0158725
ENSRNOG00000058561.1	Srrm2	10:13148251-13162956	9203	0.000122888	-2.20686	0.0158823
ENSRNOG00000031420.2	Hyal2	8:116328084-116328979	895	0.000124199	34.5259	0.0159914
ENSRNOG00000046000.2	Clasrp	1:80492404-80499040	1497	0.000124394	14.7691	0.0159966
ENSRNOG00000010966.6	Itgb1	19:61709691-61725790	2811	0.000124853	31.2182	0.0159981
ENSRNOG00000047781.2	Slc25a23	9:9999088-10003977	1859	0.000124662	8.97097	0.0159981
ENSRNOG00000043102.3	Bahcc1	10:109479676-109482318	2642	0.000126635	25.1412	0.0161433
ENSRNOG00000001171.6	Coq5	12:47078529-47079632	1024	0.000127192	27.9878	0.0161603
ENSRNOG00000019422.4	Egr1	18:27658653-27661335	2682	0.000127025	7.41103	0.0161603
ENSRNOG00000025296.5	Lrrc8a	3:8827356-8830481	3125	0.00012724	11.2668	0.0161603
ENSRNOG00000030247.5	Eif4ebp3	18:29463660-29492718	4638	0.000127456	-14.4566	0.0161677
ENSRNOG00000010993.5	Dpm1	3:164983462-164986203	310	0.000128361	-24.7255	0.0162424
ENSRNOG00000061499.1	Kmt2d	7:140488866-140516882	7629	0.000129339	26.4162	0.016346
ENSRNOG00000019465.5	Gnai3	2:210934399-210934813	414	0.000129562	-15.1687	0.0163541
ENSRNOG00000010331.5	Ctsb	15:46316735-46337671	2006	0.000131149	4.47639	0.0165139
ENSRNOG00000013236.6	Samd8	15:2685433-2730845	5574	0.000131443	-5.19699	0.016527
ENSRNOG00000061379.1	C7	2:54707618-54734388	2954	0.000131576	6.0075	0.016527
ENSRNOG00000010389.6	Ndrg2	15:28305812-28307251	1113	0.000134209	21.4519	0.0167962
ENSRNOG00000038184.4	Camk2n2	11:83975366-83977488	1341	0.000134489	6.02177	0.0168108
ENSRNOG00000014508.7	Mgll	4:120671406-120753205	679	0.00013511	-3.33336	0.0168679
ENSRNOG00000047287.2	Nucks1	13:48679672-48679965	293	0.000136315	-9.71854	0.0169565
ENSRNOG00000016311.7	Slc6a2	19:15391564-15396651	3912	0.000136871	7.24873	0.0170051
ENSRNOG00000011667.6	Fastk	4:7262135-7264638	1512	0.000138534	5.65464	0.0171909
ENSRNOG00000004284.4	Btg1	7:37811605-37815088	2687	0.000139097	4.95775	0.01724
ENSRNOG00000002514.7	Ccdc93	13:37429855-37474011	6752	0.000140795	22.2898	0.0174084
ENSRNOG00000023733.5	RGD1560821	X:77885559-77886170	503	0.000141593	-2.1958	0.0174441
ENSRNOG00000049771.1	Gstt1	20:13799056-13816578	1045	0.000142011	-3.87459	0.0174747
ENSRNOG00000018452.8	Unc13a	16:20056764-20062549	840	0.000142755	-15.5678	0.0175452
ENSRNOG00000010023.6	Slc33a1	2:154520086-154523794	2563	0.000143883	-18.0964	0.0176481
ENSRNOG00000033426.4	Cdc37	8:22156404-22173834	6158	0.000144337	-5.93047	0.0176762
ENSRNOG00000011668.6	Nfil3	17:12264073-12277152	13079	0.000147491	5.72406	0.0179809
ENSRNOG00000056870.1	Gdi1	X:156400619-156407816	3893	0.000147702	-2.27969	0.0179809
ENSRNOG00000025806.4	Prr3	20:3307207-3309775	278	0.000148273	-25.1744	0.0179867
ENSRNOG00000001030.8	Tsc22d1	15:58656492-58658467	1975	0.000148677	5.86638	0.0180145
ENSRNOG00000013090.7	Gadd45g	17:13391120-13393243	1538	0.000150503	5.14358	0.0182142
ENSRNOG00000025991.4	Pex1	4:27659380-27665976	1749	0.000151015	8.46984	0.0182547
ENSRNOG00000007104.7	Itpr1	4:140580250-140580757	507	0.000152201	8.94695	0.0183047
ENSRNOG00000015029.6	Dbt	2:219590568-219592652	2084	0.000152492	7.68104	0.0183047
ENSRNOG00000017777.3	Ahcy	3:150587784-150603129	2149	0.000152457	-2.4501	0.0183047
ENSRNOG00000000701.5	Iscu	12:48620332-48627392	2140	0.000153517	15.3381	0.0184056
ENSRNOG00000010189.8	Rps24	16:759688-762090	212	0.000154913	-4.42005	0.0185193
ENSRNOG00000053468.1	Tuba1b	7:140614740-140616199	1294	0.000155131	3.67356	0.0185193
ENSRNOG00000004544.7	Ube2e3	3:65816502-65872225	2205	0.000155569	-9.18016	0.0185434
ENSRNOG00000013954.5	Alpl	5:156086495-156141583	2483	0.000155999	-24.9185	0.0185731
ENSRNOG00000016398.6	Clstn1	5:166586087-166601863	3701	0.000156346	16.1413	0.0185928
ENSRNOG00000003809.7	Sat1	X:43626479-43629778	1496	0.000157157	3.25446	0.0186678
ENSRNOG00000004813.5	Rtcb	7:23913565-23917830	504	0.000158405	-2.72635	0.0187726
ENSRNOG00000000062.5	Pcgf3	14:2244151-2248492	4341	0.000161105	19.5055	0.0190486
ENSRNOG00000058470.1	Col12a1	8:87040795-87043225	2430	0.000161648	6.30648	0.0190908
ENSRNOG00000018796.5	Herpud1	19:11046548-11057347	2295	0.000161966	-4.1342	0.0191064
ENSRNOG00000022218.6	Ifi44	2:256897764-256915569	1818	0.000163979	14.3891	0.0193217
ENSRNOG00000012046.4	Prmt5	15:33156457-33159295	1205	0.000166338	8.92569	0.0195324
ENSRNOG00000030644.4	Mt-nd1	MT:4846-14414	254	0.000166239	-3.39719	0.0195324
ENSRNOG00000019639.6	Pgpep1	16:20521939-20531396	1689	0.000167744	-5.63396	0.0196526
ENSRNOG00000027503.5	Rps25	8:48727137-48729580	625	0.000168919	2.04545	0.0197677
ENSRNOG00000009565.4	Pdk4	4:30544836-30548955	2557	0.000171025	27.8337	0.0199461
ENSRNOG00000012682.6	Nr5a1	3:22993987-23021559	20427	0.000172709	-11.4348	0.020105
ENSRNOG00000020480.5	Fads1	1:226243508-226250215	5487	0.000174865	-8.72096	0.0203247
ENSRNOG00000001351.6	Trafd1	12:40695507-40714173	8828	0.000176817	-5.10563	0.0205283
ENSRNOG00000052113.1	Ppp1r9b	10:82806063-82816740	2737	0.000178263	-5.29326	0.0206496
ENSRNOG00000030644.4	Mt-nd1	MT:2936-15249	369	0.000178793	-3.70115	0.0206876
ENSRNOG00000008689.8	Cbx1	10:84671634-84677112	1635	0.000179328	6.78706	0.0207262
ENSRNOG00000030680.4	Ddx5	10:94979710-94988016	3691	0.000179627	6.75527	0.0207374
ENSRNOG00000010658.6	LOC103691744	2:264266852-264277344	1034	0.000181336	10.2289	0.0209112
ENSRNOG00000015461.7	Serpine2	9:85560851-85626155	2124	0.000182234	33.8916	0.0209209
ENSRNOG00000049911.3	LOC102556347	11:33846235-33865935	666	0.000182016	201.429	0.0209209
ENSRNOG00000013265.6	Tgfbr2	8:124308232-124313331	5099	0.000182547	7.29331	0.0209334
ENSRNOG00000019290.6	Pskh1	19:37873504-37885281	332	0.000183464	-24.2884	0.0209917
ENSRNOG00000013813.6	Ubtd1	1:261229221-261280543	1986	0.000184013	-8.92408	0.0210311
ENSRNOG00000011861.6	Aadat	16:32831574-32853899	1538	0.000188371	19.9239	0.0214338
ENSRNOG00000013136.6	Oxsr1	8:127920338-128009983	4567	0.000190032	9.43843	0.0215931
ENSRNOG00000011815.8	Sgk1	1:24185434-24188139	1644	0.000190473	20.1987	0.0216013
ENSRNOG00000018683.5	Dock1	1:207366902-207414852	2713	0.000190812	10.3794	0.0216159
ENSRNOG00000011956.5	Aktip	19:17290140-17301642	3333	0.000192426	-4.7423	0.0217747
ENSRNOG00000011603.7	Cab39l	15:39794632-39849054	2793	0.000194014	26.1084	0.0219302
ENSRNOG00000048848.2	Ccdc9	1:78212563-78226375	5611	0.000197864	-3.52998	0.0223163
ENSRNOG00000004245.7	Mgst3	13:85604581-85622355	328	0.000199463	82.4605	0.022472
ENSRNOG00000007687.5	Sema7a	8:62744687-62746532	1845	0.000201518	9.70792	0.0226538
ENSRNOG00000007992.6	Srsf10	5:154204804-154216944	1416	0.000202369	5.88081	0.0227246
ENSRNOG00000010989.8	Ipo5	15:106289595-106293397	1918	0.000203253	6.3543	0.0227741
ENSRNOG00000052219.1	Gm2a	10:40438307-40450945	2107	0.00020503	2.83864	0.0229481
ENSRNOG00000005397.5	Maea	14:82664222-82669168	1632	0.000208018	17.2827	0.0232278
ENSRNOG00000017956.4	Golga7	16:73574798-73579468	1586	0.000213191	27.1946	0.0237066
ENSRNOG00000060879.1	LOC100910996	7:25737940-25743538	1058	0.000213033	4.55532	0.0237066
ENSRNOG00000005191.7	Trim44	3:92183555-92242621	1693	0.000214216	20.8231	0.0237949
ENSRNOG00000003228.5	Mid1ip1	X:13114568-13116776	1928	0.000214805	-2.69313	0.0238221
ENSRNOG00000006037.8	Snap25	3:129753677-129767336	234	0.000214925	6.62225	0.0238221
ENSRNOG00000055962.1	Bgn	X:157319036-157321963	1784	0.000217698	6.97837	0.0241035
ENSRNOG00000001396.7	Mospd3	12:22164923-22169257	1581	0.000218282	-2.64586	0.0241422
ENSRNOG00000009950.6	Msantd2	8:39984632-39994276	4240	0.000219029	-4.1505	0.0241987
ENSRNOG00000011421.7	Smap2	5:139885318-139931393	2873	0.000219779	-4.66187	0.0242554
ENSRNOG00000012247.6	Rab7a	4:119910423-119916858	1867	0.000222082	10.131	0.0244571
ENSRNOG00000007213.5	Yars1	5:147375249-147403585	2547	0.000228463	-4.62829	0.0251061
ENSRNOG00000020289.6	Akt1s1	1:100845302-100851960	1841	0.000232029	-9.76703	0.0253893
ENSRNOG00000000397.6	Ccar1	20:32374488-32383870	1460	0.000232383	-4.22944	0.0254009
ENSRNOG00000020385.3	Fads3	1:226091618-226114572	7943	0.000234815	-7.51346	0.0256122
ENSRNOG00000003897.6	Col1a1	10:82758556-82762796	2663	0.000236799	9.95757	0.0257739
ENSRNOG00000021732.5	Hsf1	7:117564633-117578084	5151	0.000236657	8.26469	0.0257739
ENSRNOG00000008543.5	Pdlim2	15:51843563-51847440	930	0.000237604	2.92809	0.0258342
ENSRNOG00000010379.7	Celf1	3:79838313-79844549	707	0.000238536	13.2461	0.0259082
ENSRNOG00000008892.6	Parp2	15:27742305-27749655	1637	0.000239199	7.39221	0.0259527
ENSRNOG00000023816.5	Aph1a	2:198006289-198010611	2850	0.000241351	-17.7168	0.026131
ENSRNOG00000013288.7	Xpo7	15:52356628-52359548	2920	0.000243844	11.7894	0.0263454
ENSRNOG00000013090.7	Gadd45g	17:13391120-13393240	1914	0.000253891	4.69484	0.027259
ENSRNOG00000045785.2	LOC100359687	8:56499829-56502086	295	0.000253669	15.7445	0.027259
ENSRNOG00000016815.5	Tmem135	1:152886493-152888997	2504	0.000255967	7.66749	0.0274531
ENSRNOG00000008180.5	Lyn	5:16640642-16642776	2134	0.000257128	10.7423	0.0275489
ENSRNOG00000009592.6	Cyb5r3	7:124035200-124041630	257	0.00025988	-24.3971	0.0277733
ENSRNOG00000011052.6	Gars	4:85235121-85276086	2460	0.000260033	-4.79376	0.0277733
ENSRNOG00000042421.1	RGD1559909	5:142840875-142845428	4082	0.000261894	20.1237	0.0278851
ENSRNOG00000014475.4	Slc31a1	5:78222465-78251557	3653	0.000262634	2.70344	0.0279349
ENSRNOG00000000529.5	Pim1	20:8164942-8170035	2143	0.000263831	-2.85804	0.0280042
ENSRNOG00000025484.3	Tmem177	13:35929818-35933271	1473	0.000265374	-5.99595	0.0281105
ENSRNOG00000031135.6	Smarcc2	7:2880254-2904453	3467	0.000265498	-3.93172	0.0281105
ENSRNOG00000020851.6	Aplp1	1:88897522-88908826	2379	0.000266786	4.61404	0.0282014
ENSRNOG00000003901.6	Cfap36	14:113618654-113644870	1836	0.000269921	2.60628	0.0285034
ENSRNOG00000011648.3	Aqp1	4:85561665-85563684	2019	0.0002715	8.05369	0.0286407
ENSRNOG00000004628.7	Dazap2	7:142237317-142245550	6400	0.00027395	-4.50334	0.02884
ENSRNOG00000007584.4	Ehd4	3:111877699-111941935	3675	0.000275104	-3.55226	0.028929
ENSRNOG00000055579.1	Tmbim6	7:141053841-141070551	2694	0.000275359	18.0599	0.028929
ENSRNOG00000018945.4	Nutf2	19:37830800-37852189	2043	0.000276295	-3.15644	0.0289977
ENSRNOG00000008487.7	Amotl2	8:111216408-111226226	3466	0.000277705	6.86844	0.0290934
ENSRNOG00000012911.5	Erlin1	1:263810438-263814717	2369	0.000277773	9.72605	0.0290934
ENSRNOG00000029415.4	RGD1565784	10:14543186-14545000	1735	0.000281321	-6.36625	0.0293751
ENSRNOG00000019996.5	Slc16a1	2:207126310-207130498	4188	0.000282761	4.05489	0.0294956
ENSRNOG00000002215.7	Mylk	11:69013058-69015190	2132	0.000283921	27.5802	0.0295267
ENSRNOG00000013451.8	Drosha	2:62978327-63000307	1910	0.000285256	10.4052	0.0296355
ENSRNOG00000007570.4	Dera	4:171825208-171826414	981	0.000285944	16.4898	0.0296769
ENSRNOG00000025602.4	Cdk4	7:70348850-70352680	2186	0.000286557	2.41353	0.0296942
ENSRNOG00000057966.1	Smim31	16:26483462-26519454	953	0.000293368	-5.0214	0.0303554
ENSRNOG00000015618.3	Wnt5a	16:4485692-4490272	4580	0.000295607	24.6172	0.0305489
ENSRNOG00000018246.6	Tdp2	17:42229641-42241101	4340	0.00029828	-4.80648	0.0307091
ENSRNOG00000055984.1	Adrm1	3:175548080-175552942	1615	0.000300485	-8.0629	0.0309052
ENSRNOG00000020956.5	Bcat2	1:101570179-101572098	834	0.00030116	13.4028	0.0309436
ENSRNOG00000031420.2	Hyal2	8:116324039-116329070	1990	0.000303282	5.58309	0.0311305
ENSRNOG00000004538.5	Brd1	7:129676118-129723772	4530	0.000307463	-5.1303	0.0314654
ENSRNOG00000031135.6	Smarcc2	7:2898461-2904453	2037	0.000308728	-32.7552	0.0315634
ENSRNOG00000012956.6	Tgm2	3:154597164-154627342	3594	0.000310855	-18.0244	0.0317492
ENSRNOG00000001052.7	Slc25a30	15:57811293-57821419	5221	0.000311585	-6.12432	0.0317615
ENSRNOG00000016610.7	Arhgap1	3:80575270-80581320	6050	0.000311594	17.9704	0.0317615
ENSRNOG00000019147.7	Stom	3:14514818-14516813	1995	0.000315207	13.4766	0.0320346
ENSRNOG00000005397.5	Maea	14:82664222-82697674	2177	0.000316705	4.09874	0.0320672
ENSRNOG00000018964.2	Gss	3:151076252-151092189	1618	0.000316778	11.0834	0.0320672
ENSRNOG00000047023.2	Aldh1l1	4:123542949-123550987	850	0.000316199	-9.34	0.0320672
ENSRNOG00000017631.4	Cyp20a1	9:67148832-67179699	1628	0.000318688	22.3658	0.0322288
ENSRNOG00000010695.4	Pdgfc	2:180123231-180128285	1926	0.000322511	7.18008	0.0325514
ENSRNOG00000017595.7	Rsu1	17:80388365-80389243	809	0.000327356	2.55729	0.0329311
ENSRNOG00000028946.4	Cdc42ep4	10:102244679-102247454	2775	0.000328684	10.2361	0.0330124
ENSRNOG00000031743.5	Gbp2	2:248289075-248293863	1195	0.000334936	33.6285	0.0335556
ENSRNOG00000020667.7	Shisa5	8:117793203-117795983	1603	0.000336282	-2.50762	0.0336112
ENSRNOG00000004414.5	F11r	13:89826059-89853654	6779	0.000337303	-7.47116	0.0336387
ENSRNOG00000020871.7	Ltbp4	1:84118045-84123123	1544	0.000338484	8.6522	0.0337001
ENSRNOG00000003086.7	Cenpv	10:48846501-48861504	6236	0.000340833	-4.38781	0.0339012
ENSRNOG00000057464.1	Fmr1	X:154684831-154686088	1257	0.000341672	9.53399	0.0339517
ENSRNOG00000001989.6	Alcam	11:50969629-50986917	3102	0.000342764	4.58132	0.0340273
ENSRNOG00000060448.1	Hand2	16:36371240-36373317	681	0.000343752	3.2592	0.0340925
ENSRNOG00000019012.7	D2hgdh	9:100956476-100971466	1650	0.000345307	-21.1626	0.0342137
ENSRNOG00000016733.4	Rab13	2:189584229-189586360	872	0.000349999	-3.54293	0.0345786
ENSRNOG00000001007.7	Baiap2l1	12:12302361-12321172	1726	0.00035097	7.6136	0.0346029
ENSRNOG00000004908.5	Smc6	6:36984546-36995916	2327	0.000351255	23.7367	0.0346029
ENSRNOG00000048277.2	AABR07035787.1	12:22468777-22471092	1379	0.000352728	-25.3868	0.0347147
ENSRNOG00000009605.8	Tfe3	X:15574578-15576515	1937	0.000356201	6.78587	0.0349098
ENSRNOG00000009625.6	Dpysl2	15:43475639-43478411	2772	0.00035675	13.2985	0.0349098
ENSRNOG00000018279.7	Sfxn1	17:11045760-11082134	3089	0.000355746	-3.83979	0.0349098
ENSRNOG00000048277.2	AABR07035787.1	12:22468777-22471092	1236	0.0003563	-22.5121	0.0349098
ENSRNOG00000059715.1	Cc2d2a	14:71895127-71924526	2449	0.000356429	27.9617	0.0349098
ENSRNOG00000050552.2	AABR07053516.1	3:112333981-112358530	565	0.000357569	-34.2347	0.0349234
ENSRNOG00000005330.7	Crebbp	10:11715357-11721039	5682	0.000361251	9.84225	0.0352496
ENSRNOG00000034234.3	Mt-co1	MT:6560-8414	426	0.000362799	-3.57468	0.035367
ENSRNOG00000019556.7	Cd9	4:157977095-158010202	1323	0.0003638	29.0376	0.035431
ENSRNOG00000047023.2	Aldh1l1	4:123534125-123542106	578	0.00036569	-21.2292	0.0355814
ENSRNOG00000015417.7	Kansl3	9:42899430-42924023	3280	0.000367116	-9.72748	0.0356864
ENSRNOG00000020016.3	Lamtor1	1:166991398-166995211	322	0.00036926	-7.22476	0.0358269
ENSRNOG00000060262.1	Prps1	X:111817730-111820331	1293	0.000370792	24.6512	0.0359417
ENSRNOG00000006197.7	Calu	4:56638111-56653119	3005	0.00037191	11.5362	0.0359483
ENSRNOG00000007518.7	Nckap1	3:67760913-67774429	905	0.000371806	-4.00003	0.0359483
ENSRNOG00000056325.1	Mocs2	2:46980975-46983833	398	0.00037403	-6.44617	0.0361192
ENSRNOG00000014525.5	Hspd1	9:61680340-61683967	1674	0.000374932	4.08036	0.0361723
ENSRNOG00000013236.6	Samd8	15:2685433-2701562	4942	0.000376279	10.2479	0.0362342
ENSRNOG00000011028.8	AABR07054096.1	3:140408313-140421621	524	0.000381018	6.42366	0.036622
ENSRNOG00000043077.3	Zfpm1	19:55145690-55151147	3097	0.000381442	16.6451	0.0366284
ENSRNOG00000009957.7	Slc25a13	4:31608266-31757031	1630	0.000385623	-7.15364	0.0369953
ENSRNOG00000011661.5	Hnrnph2	X:105417643-105423531	2346	0.000388132	5.13496	0.0371666
ENSRNOG00000016271.5	Itm2b	15:55251983-55277766	4530	0.000388699	7.71257	0.0371862
ENSRNOG00000003679.6	Med13	10:73698699-73705560	4449	0.000394372	9.13506	0.0376239
ENSRNOG00000057194.1	Tars2	2:197875654-197878496	771	0.000395824	-9.54247	0.0377274
ENSRNOG00000015434.7	Midn	7:12414302-12424529	3808	0.00039643	2.29134	0.0377366
ENSRNOG00000016087.5	Hars2	18:29629183-29638744	3420	0.000396655	11.6963	0.0377366
ENSRNOG00000007971.6	Wbp2	10:104629551-104632466	1609	0.000398363	10.9106	0.037864
ENSRNOG00000000988.4	Xab2	12:2158388-2158725	254	0.000399964	-13.3463	0.0379811
ENSRNOG00000021174.7	Macrod1	1:222438053-222451486	662	0.000402134	20.3068	0.038116
ENSRNOG00000026490.6	Dnm3	13:79922554-79936582	1376	0.000403225	7.38532	0.0381287
ENSRNOG00000013484.5	Gsta1	9:27435815-27438441	946	0.000404087	5.0461	0.038161
ENSRNOG00000000481.8	Cuta	20:5531943-5533586	1081	0.000405412	13.3095	0.0382509
ENSRNOG00000019883.7	Pak4	1:85195635-85201757	2477	0.000407032	9.81625	0.0383686
ENSRNOG00000028155.6	Dnaaf2	6:91480789-91483201	2412	0.000412133	31.5486	0.0387782
ENSRNOG00000032042.4	RGD1560108	1:222671534-222679273	6591	0.000412558	5.67741	0.0387827
ENSRNOG00000012181.3	Lpl	16:22537055-22546595	2855	0.000416806	7.89503	0.0391462
ENSRNOG00000008048.8	Plscr1	8:99713582-99725217	1200	0.000417493	3.03069	0.039175
ENSRNOG00000017635.7	Inpp5a	1:211908203-211921308	2134	0.000418114	25.9389	0.0391975
ENSRNOG00000016791.8	Chka	1:219113742-219126222	1824	0.000423054	3.02607	0.0395523
ENSRNOG00000016050.7	Fgfr1	16:71264111-71269876	3091	0.000424343	29.3386	0.0396367
ENSRNOG00000012782.7	Cemip2	1:239436476-239474931	4340	0.00042558	-4.69906	0.0397162
ENSRNOG00000008167.5	Abhd6	15:18664394-18695242	456	0.000426888	-8.47971	0.0398021
ENSRNOG00000001344.7	Aldh2	12:40492318-40498905	1211	0.000429662	33.6832	0.0399796
ENSRNOG00000008459.4	Anapc13	8:111107348-111115774	625	0.000429959	-8.3626	0.0399796
ENSRNOG00000005279.4	Ndufaf7	6:1534585-1539777	801	0.000436123	-13.961	0.0404065
ENSRNOG00000018783.6	Bcas2	2:205662587-205670521	1106	0.000436994	6.82727	0.0404507
ENSRNOG00000009875.2	Akr1b7	4:61850216-61862464	5098	0.000438125	-2.46843	0.0405189
ENSRNOG00000013408.5	Npas2	9:45977862-46082065	4645	0.00044596	7.32001	0.0411324
ENSRNOG00000016220.7	Rpl12	3:12009460-12010018	464	0.000446642	3.13761	0.0411583
ENSRNOG00000030273.5	Zfp563	7:15412289-15414382	2093	0.000448693	14.2408	0.0412733
ENSRNOG00000012081.6	Txn1	5:75049593-75056771	350	0.000454455	8.47354	0.0417286
ENSRNOG00000059715.1	Cc2d2a	14:71895127-71913642	1494	0.000454262	25.6594	0.0417286
ENSRNOG00000014448.8	Arntl	1:178039039-178107231	591	0.000457916	7.06866	0.0419866
ENSRNOG00000055962.1	Bgn	X:157319036-157331217	2448	0.000458491	3.56218	0.0419866
ENSRNOG00000018487.3	Slc3a2	1:224906553-224911834	1514	0.000462375	5.07439	0.0421172
ENSRNOG00000027938.5	Jcad	17:55667647-55671617	3970	0.000460489	5.41376	0.0421172
ENSRNOG00000029095.4	Trabd	7:130066811-130069192	1861	0.000462225	19.1362	0.0421172
ENSRNOG00000001269.6	Ppp1cc	12:39864294-39865549	373	0.000463515	-12.37	0.0421836
ENSRNOG00000006770.7	Brd4	7:14222098-14230356	4589	0.000466661	11.3152	0.0423636
ENSRNOG00000006816.7	Ubr5	7:76787562-76814700	5455	0.00046673	3.88025	0.0423636
ENSRNOG00000046128.1	Gpr108	9:9704307-9708739	555	0.000468641	-6.0474	0.0424621
ENSRNOG00000000869.7	Arhgef6	X:159722030-159724244	2214	0.000470124	5.23659	0.0425589
ENSRNOG00000011295.7	Anapc2	3:2490334-2502249	3127	0.000471329	4.61617	0.0426303
ENSRNOG00000015676.7	Brd9	1:31939530-31963647	1850	0.000471846	7.64024	0.0426396
ENSRNOG00000016936.5	Nadk	5:172986080-172999795	709	0.000472597	-17.3411	0.0426699
ENSRNOG00000049110.2	Dpm2	3:11587588-11590534	867	0.000478424	2.57358	0.0431202
ENSRNOG00000023593.7	Upf2	17:76260635-76287216	1594	0.000479144	-4.7403	0.0431473
ENSRNOG00000058456.1	AABR07051177.1	3:3116-10164	1839	0.000482672	14.2819	0.0434269
ENSRNOG00000042825.2	Cd300le	10:103581133-103590698	1072	0.000491406	-7.12054	0.044174
ENSRNOG00000018653.5	Pfdn1	18:29265188-29290482	347	0.000493481	-11.3145	0.0442831
ENSRNOG00000016193.4	RGD1562114	7:12396432-12400584	2986	0.0004951	-13.0328	0.0443896
ENSRNOG00000005392.3	Ngfr	10:83389827-83408066	3278	0.000504038	13.8295	0.0451516
ENSRNOG00000000552.7	Col13a1	20:31456508-31487632	1450	0.0005059	-19.6154	0.0451749
ENSRNOG00000001870.6	Lztr1	11:87394126-87397498	1381	0.000506225	9.81034	0.0451749
ENSRNOG00000002262.3	Enoph1	14:11171896-11198348	2306	0.000506497	11.0781	0.0451749
ENSRNOG00000008816.4	Gpnmb	4:78710194-78715703	1166	0.000506455	27.8879	0.0451749
ENSRNOG00000008456.6	Thoc5	14:85160675-85171972	1266	0.000509428	7.4667	0.045397
ENSRNOG00000042592.2	Rgs10	1:199782025-199823430	937	0.000517385	2.58017	0.0460262
ENSRNOG00000005600.7	Nr4a2	3:43111239-43114725	2057	0.00051797	7.9235	0.0460384
ENSRNOG00000051952.1	Tes	4:44320340-44323014	2674	0.000522548	9.76999	0.0464051
ENSRNOG00000055756.1	Bcap31	X:157095908-157104844	628	0.000527517	-4.6011	0.046685
ENSRNOG00000008151.5	Plscr4	8:99916133-99918836	2064	0.000530384	13.8451	0.0468983
ENSRNOG00000016849.6	Ppp2r5d	9:16606937-16609689	1208	0.000533527	23.8363	0.0470952
ENSRNOG00000002199.6	Tmem165	14:34503034-34528288	1900	0.000535001	-7.99358	0.0471848
ENSRNOG00000008015.5	Fos	6:109300432-109303845	2540	0.000542318	7.64026	0.0477073
ENSRNOG00000009882.7	Ppp3ca	2:242183761-242186865	2942	0.000543356	4.32158	0.0477577
ENSRNOG00000015249.5	Taf8	9:15513028-15517054	401	0.000545157	-9.60357	0.047875
ENSRNOG00000053201.1	Gpcpd1	3:125168813-125190996	3085	0.00054575	-3.82192	0.0478861
ENSRNOG00000003897.6	Col1a1	10:82745801-82762796	5831	0.000546641	4.35839	0.0478996
ENSRNOG00000029178.6	Abcc5	11:84486001-84490786	2916	0.000546835	6.37118	0.0478996
ENSRNOG00000007920.7	Ssbp3	5:126511286-126515474	684	0.000547392	-8.98889	0.0479075
ENSRNOG00000019453.7	Rps5	1:65660408-65664927	986	0.000548514	3.71788	0.0479648
ENSRNOG00000006961.7	Snrpb	3:122696866-122703779	1026	0.000553376	-5.24335	0.0481849
ENSRNOG00000014092.7	Paip2b	4:115481052-115516298	6911	0.000554039	-15.1037	0.0482019
ENSRNOG00000053534.1	Snora78	10:14087342-14088014	437	0.000558911	-2.96779	0.0485025
ENSRNOG00000016891.7	Uimc1	17:10065883-10090296	749	0.00056392	-2.6148	0.0488547
ENSRNOG00000015274.7	Ddx20	2:208144136-208145705	1569	0.000567498	20.9804	0.0491232
ENSRNOG00000015134.5	Map3k12	7:144101736-144105820	3007	0.00056892	2.75209	0.0492048
ENSRNOG00000001469.8	Eln	12:24978383-25022101	3921	0.000572968	5.76939	0.0494717
ENSRNOG00000010602.6	Birc2	8:6012386-6036661	5458	0.000574501	5.96145	0.0495624
ENSRNOG00000010873.7	Pithd1	5:154322441-154333217	2489	0.000575512	7.19479	0.049608
ENSRNOG00000007921.8	Hnrnpm	7:18540283-18555087	1193	0.000578074	-5.20764	0.0496622
ENSRNOG00000013911.6	Nagk	4:115475667-115481410	1235	0.000577928	4.83617	0.0496622
ENSRNOG00000018778.7	Cadm1	8:52127631-52191640	3771	0.000577503	3.57593	0.0496622
ENSRNOG00000011573.6	Csad	7:143781515-143784346	1482	0.000579638	6.70301	0.0497134
ENSRNOG00000023896.4	Dusp6	7:41476371-41479392	2014	0.000579314	8.44777	0.0497134

## Sheet: CT vs. H60
The novel differentially expressed transcripts (P < 0.001, FDR < 0.05 and |FC| > 2) length associated with annotated genes identified in adrenal glands in CT vs. H60.
Gene ID	Gene name	Position	Transcript length (bp*)	P-value	FC	FDR
ENSRNOG00000003809.7	Sat1	X:43626479-43629778	1177	7.92676e-115	828.208	8.19334e-110
ENSRNOG00000046889.3	Dbi	13:36147608-36156076	624	5.27301e-50	21.0727	1.09007e-45
ENSRNOG00000050519.2	Rhoa	8:117114992-117118670	3461	1.51977e-31	17.4509	8.2678e-28
ENSRNOG00000022619.6	Fth1	1:226030347-226033228	1420	3.98116e-31	17.9901	1.95955e-27
ENSRNOG00000005513.7	Srsf5	6:104610978-104615304	2330	2.58943e-30	-272.251	1.07061e-26
ENSRNOG00000031216.3	AABR07055776.1	7:9974046-9978638	4386	1.13661e-29	9.14884	4.19583e-26
ENSRNOG00000008822.5	Fkbp1a	3:147042793-147043174	308	3.65117e-27	-156.355	1.14362e-23
ENSRNOG00000005964.5	Nr4a3	5:63793016-63822951	4006	9.34529e-27	7.00448	2.61069e-23
ENSRNOG00000012106.4	Dnaja4	8:59287765-59296219	4090	1.29657e-26	17.9215	3.52677e-23
ENSRNOG00000005963.7	Rab2a	5:21632631-21698227	3623	2.01642e-26	42.9259	5.34063e-23
ENSRNOG00000009884.6	Lgals1	7:120152756-120156294	937	3.26262e-26	-6.37493	8.02937e-23
ENSRNOG00000005698.2	Ndufa5	4:51586857-51598771	6842	8.29858e-26	24.7109	1.99481e-22
ENSRNOG00000000428.6	Cyp21a1	20:4486218-4489286	2032	3.00225e-25	268.252	6.89603e-22
ENSRNOG00000037673.3	AABR07071891.1	1:84573474-84575986	337	2.29458e-24	-38.3305	5.04626e-21
ENSRNOG00000023546.5	Hspb1	12:23839305-23841347	1270	3.20163e-24	12.933	6.89438e-21
ENSRNOG00000007766.6	Pqbp1	X:15449162-15453130	1010	3.55527e-24	149.146	7.49965e-21
ENSRNOG00000003743.7	Dars	13:45078703-45081563	2860	1.47437e-23	2.84504	2.93068e-20
ENSRNOG00000019453.7	Rps5	1:65660466-65664799	800	1.54122e-23	14.3547	3.00575e-20
ENSRNOG00000003687.6	Rgs2	13:60845355-60849094	1820	6.85433e-23	12.2134	1.31201e-19
ENSRNOG00000009439.6	Eef1a1	8:85839787-85842187	2219	1.47595e-21	5.77836	2.50097e-18
ENSRNOG00000013011.7	Dnajb4	2:257394641-257406569	2928	1.71191e-21	7.61083	2.85399e-18
ENSRNOG00000015277.7	Serf2	3:113415735-113417505	606	3.95164e-21	4.50446	6.38209e-18
ENSRNOG00000001189.6	Sik1	20:10668410-10680374	5075	9.34139e-21	13.3266	1.46296e-17
ENSRNOG00000021475.6	Ldah	6:33407234-33440821	2101	9.72052e-21	58.4864	1.49962e-17
ENSRNOG00000052275.1	H2az2	14:86694847-86706648	305	2.49495e-20	-31.0958	3.63219e-17
ENSRNOG00000042884.4	Hsd3b3	2:200713453-200757361	262	5.86618e-20	-13.6895	8.42147e-17
ENSRNOG00000004284.4	Btg1	7:37813567-37815564	1997	9.34479e-20	58.387	1.23834e-16
ENSRNOG00000010389.6	Ndrg2	15:28305812-28307093	1086	1.11774e-19	-183.049	1.4586e-16
ENSRNOG00000057823.1	Ubc	12:36638376-36642734	2625	1.1449e-19	7.82247	1.46099e-16
ENSRNOG00000017418.5	Rps3	1:164440066-164441198	203	3.01198e-19	-6.90395	3.66267e-16
ENSRNOG00000004284.4	Btg1	7:37811605-37815088	2687	3.05136e-19	10.1783	3.66741e-16
ENSRNOG00000016269.7	Rpl7l1	9:16513000-16517196	2258	1.66133e-18	-159.522	1.908e-15
ENSRNOG00000006331.4	Elovl5	8:85284374-85287952	2612	4.11263e-18	36.9154	4.57091e-15
ENSRNOG00000011039.7	Gch1	15:23933266-23969035	2824	6.93097e-18	8.87142	7.54111e-15
ENSRNOG00000037352.3	RGD1562747	8:69484173-69489016	2252	7.31988e-18	10.5008	7.8813e-15
ENSRNOG00000019584.6	Dlk1	6:133576324-133578665	641	7.4632e-18	3.52489	7.95277e-15
ENSRNOG00000051563.1	Giot1	7:13112465-13113715	1250	8.74669e-18	8.43819	9.22535e-15
ENSRNOG00000053362.1	Gabarapl1	4:163293612-163303167	2106	9.08756e-18	2.62453	9.48806e-15
ENSRNOG00000002828.7	Tob1	10:81911713-81915728	2122	1.35598e-17	4.44437	1.40158e-14
ENSRNOG00000001148.6	Rplp0	12:46790733-46794521	1862	1.51886e-17	11.678	1.55439e-14
ENSRNOG00000059459.1	AABR07047256.1	5:25339433-25340989	240	1.9181e-17	12.9686	1.90635e-14
ENSRNOG00000028155.6	Dnaaf2	6:91480789-91490366	3650	7.72167e-17	29.8839	7.25577e-14
ENSRNOG00000042271.3	Ubb	10:48881048-48881881	833	1.79417e-16	4.7272	1.61262e-13
ENSRNOG00000003049.7	Hsd17b10	X:21696709-21699245	997	2.25304e-16	23.8332	1.99043e-13
ENSRNOG00000004726.7	Mapkapk2	13:47784952-47831110	2734	2.56011e-16	13.6694	2.24255e-13
ENSRNOG00000050578.2	Rheb	4:6825871-6873513	2764	2.8407e-16	9.52542	2.46742e-13
ENSRNOG00000019834.6	Hsp90ab1	9:17817703-17823243	2505	3.27087e-16	3.61042	2.7712e-13
ENSRNOG00000012106.4	Dnaja4	8:59287765-59296219	3180	3.53155e-16	11.9849	2.96774e-13
ENSRNOG00000015408.5	Vil1	9:81711630-81717621	1324	3.90128e-16	14.6876	3.252e-13
ENSRNOG00000006283.3	LOC100359922	8:6749743-6750456	713	5.21984e-16	2.07332	4.28205e-13
ENSRNOG00000020298.6	Bag3	1:199940977-199965191	2608	7.13435e-16	9.96931	5.67252e-13
ENSRNOG00000003150.7	Mpc2	13:83697295-83700691	720	7.88847e-16	-147.578	6.22424e-13
ENSRNOG00000005513.7	Srsf5	6:104610981-104615303	2068	1.22644e-15	132.601	9.60366e-13
ENSRNOG00000004814.6	Elob	10:13162616-13166238	695	1.29537e-15	-24.3005	1.00672e-12
ENSRNOG00000001820.7	Med21	4:180961141-180968150	821	1.36535e-15	-22.3626	1.05319e-12
ENSRNOG00000026605.5	Ifi27l2b	6:127336304-127337861	521	1.39059e-15	-247.311	1.06471e-12
ENSRNOG00000014204.7	Pacsin3	3:80072424-80081129	1890	1.42162e-15	-6.35887	1.08046e-12
ENSRNOG00000019996.5	Slc16a1	2:207126310-207130498	4188	1.46942e-15	11.2399	1.10061e-12
ENSRNOG00000032917.3	Zfand2a	12:17252085-17263506	3230	1.80465e-15	23.0746	1.34197e-12
ENSRNOG00000046484.1	Ccdc160	X:140169583-140177248	1647	2.16007e-15	-5.59326	1.57233e-12
ENSRNOG00000020644.4	Nsg2	10:15867876-15928215	2320	2.35284e-15	8.95791	1.70068e-12
ENSRNOG00000032917.3	Zfand2a	12:17252085-17263506	3230	4.55416e-15	21.226	3.26897e-12
ENSRNOG00000021027.6	Dbp	1:101687609-101692845	4031	5.33357e-15	-14.7394	3.77598e-12
ENSRNOG00000057823.1	Ubc	12:36638432-36640452	2020	6.85009e-15	16.5226	4.81664e-12
ENSRNOG00000007392.3	Atp6v1f	4:56744512-56747656	691	7.66508e-15	-8.79831	5.35328e-12
ENSRNOG00000017801.7	Atf4	7:121480396-121482780	1735	1.08666e-14	9.83981	7.38948e-12
ENSRNOG00000004466.4	Fam210b	3:170354048-170364448	3620	1.66638e-14	-4.04841	1.10412e-11
ENSRNOG00000003359.7	Ogt	X:71573205-71585908	3307	1.70061e-14	-20.2692	1.11962e-11
ENSRNOG00000015320.7	Atp5mc2	7:144263869-144269490	944	2.87097e-14	5.15196	1.8547e-11
ENSRNOG00000057823.1	Ubc	12:36638210-36642734	2791	3.49635e-14	78.7953	2.23082e-11
ENSRNOG00000025587.4	Plagl1	1:7254557-7259419	4862	3.53147e-14	10.2384	2.23941e-11
ENSRNOG00000017829.5	Ssu72	5:173149882-173182721	4121	4.71216e-14	24.9337	2.9519e-11
ENSRNOG00000005413.5	Creb3l1	3:80892432-80894724	2128	5.11135e-14	12.2593	3.18268e-11
ENSRNOG00000017418.5	Rps3	1:164435870-164436966	334	6.87749e-14	-6.13195	4.23141e-11
ENSRNOG00000050044.2	Ptp4a2	5:148050708-148061388	2579	1.01184e-13	2.48971	6.15219e-11
ENSRNOG00000012106.4	Dnaja4	8:59278899-59289987	2144	1.44328e-13	21.6874	8.57364e-11
ENSRNOG00000007793.6	Pnrc1	5:48501387-48505412	2598	1.63469e-13	4.91203	9.65521e-11
ENSRNOG00000018281.6	Uqcrfs1	17:35677933-35682259	1135	1.8251e-13	3.47752	1.0539e-10
ENSRNOG00000008706.6	Tbx3	12:42479516-42493371	4850	1.88583e-13	21.806	1.08292e-10
ENSRNOG00000011661.5	Hnrnph2	X:105417628-105423531	2361	1.92069e-13	9.93687	1.09082e-10
ENSRNOG00000007671.4	Smu1	5:57042609-57056711	1507	2.20508e-13	-21.4807	1.23202e-10
ENSRNOG00000002461.7	Nid1	17:90576269-90631054	6634	3.79799e-13	80.3981	2.08815e-10
ENSRNOG00000002178.5	Mrps18c	14:10442146-10446922	350	4.28035e-13	-30.2173	2.3409e-10
ENSRNOG00000009845.3	Acadm	2:260124157-260137181	1552	5.01788e-13	19.577	2.70137e-10
ENSRNOG00000001293.6	Get4	12:17469111-17486588	2522	5.6972e-13	87.3457	3.03546e-10
ENSRNOG00000012106.4	Dnaja4	8:59278899-59289987	1234	6.45464e-13	14.1966	3.40393e-10
ENSRNOG00000012247.6	Rab7a	4:119910423-119959243	2199	7.20641e-13	-2.44479	3.762e-10
ENSRNOG00000028323.6	Dhrsx	12:18516869-18521892	1721	7.63901e-13	6.66326	3.92832e-10
ENSRNOG00000009094.4	Nudt4	7:36643816-36660340	3224	9.20827e-13	6.07964	4.68864e-10
ENSRNOG00000051563.1	Giot1	7:13092572-13108490	15918	1.10277e-12	13.7926	5.56026e-10
ENSRNOG00000010873.7	Pithd1	5:154322441-154333217	1802	1.13927e-12	7.62908	5.7164e-10
ENSRNOG00000007111.7	Nrdc	5:128692650-128695076	1645	1.55764e-12	-13.5085	7.7405e-10
ENSRNOG00000008465.6	Tmem176b	4:78450247-78458269	1643	1.63438e-12	-2.86587	8.08299e-10
ENSRNOG00000058484.1	Anp32a	AABR07024206.1:5607-8624	424	2.67517e-12	-5.77524	1.28611e-09
ENSRNOG00000019868.7	Psma5	2:211050333-211073714	1035	2.82827e-12	-6.85272	1.34718e-09
ENSRNOG00000019189.7	Acat2	1:47984459-47985888	1429	2.8782e-12	16.8523	1.36468e-09
ENSRNOG00000021269.5	Chgb	3:125428259-125441732	2671	3.02507e-12	4.67737	1.42776e-09
ENSRNOG00000051563.1	Giot1	7:13092572-13111070	16156	3.25114e-12	9.23461	1.51384e-09
ENSRNOG00000057823.1	Ubc	12:36638432-36642734	2565	3.63256e-12	9.50528	1.68373e-09
ENSRNOG00000046667.2	Fosb	1:80214467-80221947	3864	3.8907e-12	33.4763	1.78735e-09
ENSRNOG00000007573.4	Hoxb9	10:84115130-84125591	10461	5.3186e-12	3.45587	2.40064e-09
ENSRNOG00000015496.6	Tpm4	16:19384587-19399903	2169	6.91343e-12	2.7979	3.08014e-09
ENSRNOG00000045649.2	Arrdc3	2:8732913-8745884	4549	8.47496e-12	8.24878	3.72765e-09
ENSRNOG00000019189.7	Acat2	1:47974571-47984231	9660	1.04346e-11	19.4602	4.57014e-09
ENSRNOG00000014743.5	Hagh	10:14215560-14230838	1770	1.16325e-11	17.2164	5.03082e-09
ENSRNOG00000008338.7	Bsdc1	5:147661587-147689759	2710	1.43693e-11	-69.6155	6.16288e-09
ENSRNOG00000016957.5	Igfbp2	9:80117590-80144814	1743	1.55318e-11	-2.64682	6.57957e-09
ENSRNOG00000019091.7	Wtap	1:47958482-47967631	1563	2.41881e-11	-25.0463	1.02047e-08
ENSRNOG00000021475.6	Ldah	6:33488592-33491877	3285	2.72503e-11	13.3145	1.14499e-08
ENSRNOG00000053577.1	Gramd1b	8:44324065-44328062	3997	2.7996e-11	12.2022	1.17156e-08
ENSRNOG00000000902.7	Hsph1	12:6322203-6335463	3090	2.98672e-11	21.9772	1.23982e-08
ENSRNOG00000000661.5	Hps4	12:50312332-50315856	892	5.06434e-11	12.364	2.0528e-08
ENSRNOG00000058646.1	Zfp36l1	6:103307779-103313518	5739	5.49391e-11	2.99093	2.21575e-08
ENSRNOG00000056637.1	Abhd16a	20:5093395-5094935	783	7.40125e-11	-6.74436	2.89779e-08
ENSRNOG00000043114.1	Tomm7	4:7835905-7842834	464	7.58657e-11	-4.03707	2.95914e-08
ENSRNOG00000011668.6	Nfil3	17:12261585-12277472	15887	7.68354e-11	27.5964	2.97451e-08
ENSRNOG00000015999.6	Cirbp	7:12400334-12405061	2436	8.6266e-11	-8.67944	3.30249e-08
ENSRNOG00000021732.5	Hsf1	7:117564633-117578084	5151	1.02951e-10	15.909	3.89792e-08
ENSRNOG00000000275.8	Fam13c	20:19359891-19399671	2341	1.23072e-10	23.727	4.62585e-08
ENSRNOG00000046667.2	Fosb	1:80214483-80217062	2579	1.26675e-10	37.4156	4.74404e-08
ENSRNOG00000005513.7	Srsf5	6:104611017-104615304	2298	1.27741e-10	-2.93476	4.75043e-08
ENSRNOG00000003476.7	Slc6a4	10:63153180-63186517	3259	1.70591e-10	5.5667	6.1653e-08
ENSRNOG00000030644.4	Mt-nd1	MT:2936-15249	369	1.95109e-10	-6.01255	6.95414e-08
ENSRNOG00000014806.7	Pnkd	9:81566023-81568532	674	2.13224e-10	-9.78563	7.55522e-08
ENSRNOG00000016733.4	Rab13	2:189584274-189586364	831	2.24888e-10	-10.235	7.93349e-08
ENSRNOG00000058412.1	Morf4l1	8:97490400-97494975	228	2.4873e-10	-4.02227	8.65639e-08
ENSRNOG00000004827.7	Papola	6:129627824-129662091	4153	3.08099e-10	10.2233	1.06704e-07
ENSRNOG00000017843.6	Polr3k	3:177374636-177379008	1140	3.08666e-10	-3.52489	1.06704e-07
ENSRNOG00000057078.1	Ddit4	20:29509277-29511439	2038	3.15566e-10	12.6718	1.08726e-07
ENSRNOG00000009567.8	Mrpl10	10:84976365-84984796	1713	3.21624e-10	-2.73656	1.10445e-07
ENSRNOG00000002093.4	Tgfbr3	14:3658653-3682553	3513	3.38244e-10	8.15719	1.15386e-07
ENSRNOG00000014900.8	Crem	17:57074507-57088306	440	3.42446e-10	6.03327	1.16435e-07
ENSRNOG00000055408.1	Gcat	7:120260139-120265504	3247	3.43852e-10	-3.37404	1.1653e-07
ENSRNOG00000030449.5	Gsta4	8:85497554-85518889	899	4.12601e-10	-30.7123	1.37573e-07
ENSRNOG00000046883.2	Mydgf	9:10885383-10892744	1014	4.25551e-10	-16.4568	1.41435e-07
ENSRNOG00000053070.1	AABR07053749.2	3:124004418-124005426	1008	4.28882e-10	15.6431	1.42085e-07
ENSRNOG00000019506.7	Dnajb2	9:82436455-82445376	3675	4.54135e-10	-17.7196	1.49018e-07
ENSRNOG00000023520.5	Cs	7:2768575-2780379	2801	4.67196e-10	-112.962	1.52337e-07
ENSRNOG00000007349.7	Ascc2	14:84873455-84882911	369	5.1193e-10	-60.1812	1.66398e-07
ENSRNOG00000050792.2	Tnfaip6	3:37545170-37564730	1466	5.63393e-10	6.66521	1.82552e-07
ENSRNOG00000027405.6	Ccp110	1:188442114-188444995	2881	5.93632e-10	64.9622	1.91749e-07
ENSRNOG00000013479.7	Stard7	3:119711834-119727347	2583	6.8048e-10	-17.6553	2.17088e-07
ENSRNOG00000020660.7	Cfl1	1:220869739-220873337	1534	9.2062e-10	-55.1308	2.89234e-07
ENSRNOG00000005600.7	Nr4a2	3:43111239-43119550	3766	9.38942e-10	11.3586	2.94097e-07
ENSRNOG00000002255.8	Fam162a	11:67618483-67645311	1437	1.02294e-09	20.2542	3.1752e-07
ENSRNOG00000058601.1	AABR07036542.1	12:47841717-47848813	1685	1.06611e-09	14.6795	3.2993e-07
ENSRNOG00000013751.6	Plpbp	16:69163576-69176055	2066	1.12082e-09	-15.9372	3.43774e-07
ENSRNOG00000005371.8	Klhl29	6:29178354-29181305	1057	1.14253e-09	11.3286	3.49396e-07
ENSRNOG00000017829.5	Ssu72	5:173149307-173182855	4830	1.14874e-09	12.7821	3.50258e-07
ENSRNOG00000003228.5	Mid1ip1	X:13114568-13116775	1927	1.17971e-09	-4.36943	3.56675e-07
ENSRNOG00000019136.6	Scamp2	8:62341588-62368214	2354	1.18014e-09	-14.0859	3.56675e-07
ENSRNOG00000015095.7	Spryd7	15:41870761-41890795	1451	1.19768e-09	59.3543	3.60922e-07
ENSRNOG00000003687.6	Rgs2	13:60845355-60849094	2064	1.22198e-09	14.5956	3.67173e-07
ENSRNOG00000049876.1	Prkar1a	10:97951583-97959221	2873	1.29439e-09	-37.2829	3.87802e-07
ENSRNOG00000007091.8	Ly6e	7:116356168-116359944	1345	1.40463e-09	11.2934	4.16624e-07
ENSRNOG00000011238.6	Tiparp	2:157335486-157342979	2461	1.53101e-09	7.22991	4.49572e-07
ENSRNOG00000016930.5	Ube2s	1:72580076-72584484	1295	1.71399e-09	2.34201	5.00461e-07
ENSRNOG00000006751.5	Psmd6	15:12407508-12416152	1423	1.85681e-09	-3.45764	5.39116e-07
ENSRNOG00000033169.5	Cpeb4	10:15984518-16047248	7594	1.87964e-09	2.79223	5.44217e-07
ENSRNOG00000020410.5	Th	1:216073025-216076643	1191	1.95259e-09	-29.1695	5.60626e-07
ENSRNOG00000019422.4	Egr1	18:27657550-27658125	575	1.97994e-09	22.3762	5.66904e-07
ENSRNOG00000009358.6	Osgin2	5:29662297-29682070	3569	2.11205e-09	10.832	5.98103e-07
ENSRNOG00000050786.2	AC103024.2	10:34316836-34317161	325	2.23491e-09	-52.7181	6.31167e-07
ENSRNOG00000009358.6	Osgin2	5:29662297-29682070	6534	2.28476e-09	7.10743	6.43486e-07
ENSRNOG00000032917.3	Zfand2a	12:17254532-17263479	2891	2.33682e-09	45.2185	6.55157e-07
ENSRNOG00000033169.5	Cpeb4	10:15984518-16002630	8982	2.33887e-09	5.14346	6.55157e-07
ENSRNOG00000030091.6	Dusp14	10:71363687-71382078	1359	2.45282e-09	17.8102	6.8522e-07
ENSRNOG00000050794.1	Pdlim4	10:39390495-39405360	1310	2.64809e-09	-7.81011	7.37774e-07
ENSRNOG00000058039.1	Acta2	1:252537487-252550419	1546	2.67375e-09	6.81449	7.42923e-07
ENSRNOG00000008140.6	Rpl15	15:8188419-8189814	1154	2.73813e-09	4.01688	7.58769e-07
ENSRNOG00000002461.7	Nid1	17:90552888-90578738	12096	2.81663e-09	5.69162	7.74297e-07
ENSRNOG00000011238.6	Tiparp	2:157316265-157342979	3864	2.86586e-09	9.16297	7.85741e-07
ENSRNOG00000017194.5	Prdx1	5:135545318-135552015	478	2.90752e-09	39.3661	7.95053e-07
ENSRNOG00000015866.5	Hint2	5:59149566-59152710	1475	2.91842e-09	-13.1325	7.95928e-07
ENSRNOG00000030111.4	Cyp11b3	7:116226546-116250056	898	3.62377e-09	22.8311	9.70371e-07
ENSRNOG00000034234.3	Mt-co1	MT:6560-8414	426	3.60986e-09	-5.87669	9.70371e-07
ENSRNOG00000055257.1	Selenof	2:250600822-250634232	1850	3.70516e-09	4.55911	9.89603e-07
ENSRNOG00000018326.5	Pgls	16:20024553-20025930	537	3.9426e-09	-11.9981	1.04761e-06
ENSRNOG00000014846.6	Anp32a	8:67295823-67298310	550	3.97436e-09	26.7997	1.05334e-06
ENSRNOG00000031766.3	Mt-cyb	MT:6885-14363	217	4.47621e-09	-3.38527	1.18029e-06
ENSRNOG00000017657.5	Phf23	10:56605053-56609236	1774	4.61923e-09	-28.5029	1.20875e-06
ENSRNOG00000005371.8	Klhl29	6:29178354-29181290	1322	4.87455e-09	51.883	1.27145e-06
ENSRNOG00000018848.7	Eif1b	8:129157959-129160757	1065	4.88341e-09	4.10098	1.27145e-06
ENSRNOG00000019466.7	Agpat2	3:4043645-4056563	3111	5.22255e-09	-3.22068	1.35633e-06
ENSRNOG00000013136.6	Oxsr1	8:127920348-128010018	4592	5.56725e-09	-51.1228	1.43503e-06
ENSRNOG00000005482.5	Sap30bp	10:104482971-104510460	636	5.63263e-09	-11.8368	1.44468e-06
ENSRNOG00000004019.3	Phlda1	7:54246985-54250098	3113	6.13004e-09	6.95874	1.56836e-06
ENSRNOG00000000111.5	Coprs	16:80826657-80832023	807	6.31129e-09	-21.1854	1.60983e-06
ENSRNOG00000060728.1	Tuba1a	7:140638393-140641241	963	6.4839e-09	22.2135	1.64667e-06
ENSRNOG00000015999.6	Cirbp	7:12400334-12405061	2235	7.47266e-09	-13.2396	1.87931e-06
ENSRNOG00000002050.4	Igfbp7	14:33063467-33070193	614	7.55535e-09	-3.36712	1.89549e-06
ENSRNOG00000001851.7	Far2	4:182528966-182565436	3779	9.25354e-09	4.35529	2.29922e-06
ENSRNOG00000020298.6	Bag3	1:199939955-199965458	3897	9.32276e-09	22.9861	2.31086e-06
ENSRNOG00000058386.1	Golt1b	4:176606640-176619710	2888	9.91004e-09	-10.8216	2.45055e-06
ENSRNOG00000050343.3	Jmy	2:23036593-23056610	2953	1.03429e-08	7.64192	2.53936e-06
ENSRNOG00000012106.4	Dnaja4	8:59291240-59295639	4299	1.10808e-08	17.9987	2.69586e-06
ENSRNOG00000019666.7	Ubxn1	1:225067947-225071946	1127	1.11216e-08	4.60046	2.69851e-06
ENSRNOG00000012786.7	Pgrmc1	X:123205205-123214767	3391	1.15033e-08	2.26344	2.78457e-06
ENSRNOG00000051498.1	Prpf6	3:177158115-177163397	1079	1.16904e-08	-20.6794	2.82326e-06
ENSRNOG00000036852.3	Pcbp2	7:144092662-144102260	2289	1.19461e-08	2.95766	2.8716e-06
ENSRNOG00000006756.8	Maged1	X:63803169-63810010	3206	1.22406e-08	4.54862	2.93557e-06
ENSRNOG00000019666.7	Ubxn1	1:225067976-225071945	1097	1.22997e-08	-59.6105	2.9429e-06
ENSRNOG00000011771.3	Ptp4a1	9:37230858-37231664	806	1.27729e-08	19.2529	3.04907e-06
ENSRNOG00000050998.3	AABR07044397.1	20:4638126-4638832	706	1.29139e-08	10.801	3.07561e-06
ENSRNOG00000021168.7	Anp32e	2:198044667-198057005	2849	1.31842e-08	18.9224	3.1256e-06
ENSRNOG00000002746.7	Fstl1	11:65781196-65782655	916	1.37342e-08	19.7008	3.24852e-06
ENSRNOG00000018109.4	Clic4	5:153565420-153625870	4479	1.61379e-08	4.3168	3.7739e-06
ENSRNOG00000001820.7	Med21	4:180961141-180968155	826	1.63172e-08	41.75	3.79864e-06
ENSRNOG00000032917.3	Zfand2a	12:17254532-17263479	3059	1.63809e-08	28.0716	3.8049e-06
ENSRNOG00000045637.1	Rnf14	18:31443436-31448480	374	1.6489e-08	-46.0389	3.82141e-06
ENSRNOG00000010706.4	Ccdc117	14:85761949-85772947	3831	1.68541e-08	4.35971	3.8807e-06
ENSRNOG00000036687.3	Alyref	10:109774229-109774748	519	1.766e-08	26.0288	4.05643e-06
ENSRNOG00000022681.5	RGD1561113	3:11408081-11410910	696	1.81565e-08	2.25831	4.15201e-06
ENSRNOG00000015018.7	Pdia3	3:113376905-113400707	3120	1.864e-08	40.6306	4.25317e-06
ENSRNOG00000042884.4	Hsd3b3	2:200713244-200757361	648	1.89011e-08	3.01205	4.30324e-06
ENSRNOG00000013370.4	Gfer	10:14059342-14061014	913	1.96489e-08	-4.26986	4.45387e-06
ENSRNOG00000005513.7	Srsf5	6:104610981-104615304	2331	1.98953e-08	-46.2921	4.49985e-06
ENSRNOG00000007091.8	Ly6e	7:116356135-116359944	1375	2.02889e-08	8.93742	4.56889e-06
ENSRNOG00000049876.1	Prkar1a	10:97940801-97959221	3647	2.08749e-08	3.06534	4.68046e-06
ENSRNOG00000004791.5	Arf6	6:91696579-91699874	3295	2.11838e-08	8.54099	4.72921e-06
ENSRNOG00000029178.6	Abcc5	11:84466322-84490806	6215	2.34215e-08	3.50262	5.18397e-06
ENSRNOG00000009625.6	Dpysl2	15:43475638-43543092	4570	2.416e-08	3.17406	5.33448e-06
ENSRNOG00000010240.6	Tent5a	8:92935490-92942125	5365	2.42047e-08	6.4377	5.33448e-06
ENSRNOG00000006604.3	Thy1	8:48382109-48387271	1675	2.48882e-08	2.83032	5.47345e-06
ENSRNOG00000011668.6	Nfil3	17:12264073-12277152	13079	2.55089e-08	12.8467	5.59804e-06
ENSRNOG00000049758.2	Tbc1d16	10:108255949-108263481	4228	2.61658e-08	29.8616	5.72172e-06
ENSRNOG00000012404.6	Thrsp	1:162381191-162385869	1587	2.81729e-08	-14.6388	6.10489e-06
ENSRNOG00000009766.7	Gpr180	15:103344898-103369639	5415	2.8269e-08	19.1273	6.1129e-06
ENSRNOG00000052357.1	Fosl2	6:25594245-25598977	4732	3.01613e-08	2.3241	6.48142e-06
ENSRNOG00000000428.6	Cyp21a1	20:4486218-4489347	2096	3.032e-08	-2.41826	6.48853e-06
ENSRNOG00000018091.6	Gdi2	17:70325600-70325988	388	3.28707e-08	-43.9214	6.94809e-06
ENSRNOG00000009360.6	Sh3bp1	7:120125082-120136190	2342	3.30033e-08	31.9358	6.95355e-06
ENSRNOG00000021085.8	Sf1	1:221743651-221746017	977	3.30311e-08	-5.95054	6.95355e-06
ENSRNOG00000019915.5	Xrcc1	1:81426109-81441679	2127	3.64597e-08	-14.3891	7.6442e-06
ENSRNOG00000025484.3	Tmem177	13:35929818-35933271	1473	3.73891e-08	-50.7068	7.82318e-06
ENSRNOG00000014208.5	Dctn3	5:58100463-58106753	481	3.79569e-08	-5.82734	7.92593e-06
ENSRNOG00000001052.7	Slc25a30	15:57810285-57821366	4441	4.03059e-08	3.96743	8.39948e-06
ENSRNOG00000007029.3	Dnaja1	5:57029351-57043002	13555	4.11695e-08	9.16049	8.51081e-06
ENSRNOG00000019996.5	Slc16a1	2:207118207-207130498	5427	4.10683e-08	6.22446	8.51081e-06
ENSRNOG00000056427.1	AABR07007717.1	2:25564849-25569501	2211	4.1157e-08	3.20395	8.51081e-06
ENSRNOG00000021719.7	Slfn5	10:70302596-70312096	5753	4.2406e-08	-2.55707	8.73149e-06
ENSRNOG00000002735.6	Dhx9	13:70885466-70890460	2075	4.38213e-08	-59.1173	9.00497e-06
ENSRNOG00000005191.7	Trim44	3:92183555-92242621	1693	4.81665e-08	34.8029	9.85868e-06
ENSRNOG00000018184.8	Tpm1	8:72814736-72841550	1784	4.93381e-08	11.1684	1.00783e-05
ENSRNOG00000020678.5	Ifi35	10:89358347-89366773	1246	4.94347e-08	76.6609	1.00783e-05
ENSRNOG00000048848.2	Ccdc9	1:78212563-78226375	5611	4.97445e-08	-7.44655	1.01016e-05
ENSRNOG00000015434.7	Midn	7:12414302-12424502	3907	5.12247e-08	2.74394	1.03615e-05
ENSRNOG00000018255.6	Clptm1	1:80558030-80580693	626	5.19393e-08	-11.4219	1.04856e-05
ENSRNOG00000004740.7	Mmadhc	3:35783314-35801614	1711	5.23646e-08	-46.2902	1.05508e-05
ENSRNOG00000020385.3	Fads3	1:226091618-226114572	7943	5.2676e-08	-36.4952	1.05929e-05
ENSRNOG00000046667.2	Fosb	1:80214467-80221947	4004	5.3747e-08	29.7661	1.07873e-05
ENSRNOG00000000796.8	Ranbp2	20:28050478-28068211	6579	5.4889e-08	5.97112	1.09739e-05
ENSRNOG00000015840.7	Hsd17b4	18:44875316-44897680	870	5.61631e-08	-74.9049	1.12069e-05
ENSRNOG00000009175.5	Jagn1	4:145399903-145404617	1187	6.64332e-08	-50.4187	1.31547e-05
ENSRNOG00000019900.6	Slc35b2	9:17822935-17826092	2048	6.63647e-08	3.02294	1.31547e-05
ENSRNOG00000008487.7	Amotl2	8:111210690-111226226	4275	6.99667e-08	7.14486	1.37752e-05
ENSRNOG00000021264.6	Pcna	3:124880463-124884704	1528	7.13357e-08	3.40561	1.39914e-05
ENSRNOG00000042592.2	Rgs10	1:199782025-199823430	937	7.50396e-08	3.39547	1.46346e-05
ENSRNOG00000020298.6	Bag3	1:199959828-199965191	1795	8.26524e-08	31.5842	1.59985e-05
ENSRNOG00000003147.8	Sqstm1	10:35709890-35716353	4162	8.58573e-08	4.51769	1.64953e-05
ENSRNOG00000016532.6	Ino80c	18:15994997-16009718	2598	8.61128e-08	18.4608	1.65137e-05
ENSRNOG00000000557.5	Ppa1	20:31298268-31310681	2632	8.78291e-08	5.8012	1.68116e-05
ENSRNOG00000003127.4	Spryd4	7:2621960-2623809	1506	8.94925e-08	-9.91495	1.70984e-05
ENSRNOG00000009205.6	Lmo4	2:250235249-250235949	700	9.618e-08	19.3291	1.81413e-05
ENSRNOG00000052142.1	Ahsa2	14:108263487-108273151	5676	9.58319e-08	14.238	1.81413e-05
ENSRNOG00000050006.1	Agtr2	X:119389546-119393909	3039	9.8242e-08	2.51933	1.84629e-05
ENSRNOG00000015461.7	Serpine2	9:85560851-85626121	2090	1.11543e-07	44.449	2.08488e-05
ENSRNOG00000015052.4	Star	16:71033858-71040862	3514	1.17584e-07	3.22692	2.18202e-05
ENSRNOG00000010170.5	Tubb4b	3:2441732-2444365	1731	1.18855e-07	2.7756	2.20165e-05
ENSRNOG00000017466.6	Kif5b	17:54198607-54219432	4768	1.21177e-07	5.23877	2.22869e-05
ENSRNOG00000025053.5	Lrp1	7:70846273-70854207	3413	1.20841e-07	12.532	2.22869e-05
ENSRNOG00000021264.6	Pcna	3:124880463-124884703	1527	1.31721e-07	3.25637	2.4077e-05
ENSRNOG00000061056.1	AABR07042514.3	X:158581630-158582269	639	1.31842e-07	3.19756	2.4077e-05
ENSRNOG00000049560.2	Glul	13:71331025-71340229	2511	1.32348e-07	-9.28985	2.41268e-05
ENSRNOG00000058882.1	Emd	X:156452805-156456035	1488	1.34798e-07	12.8788	2.45302e-05
ENSRNOG00000019915.5	Xrcc1	1:81413247-81441679	2184	1.37124e-07	4.94797	2.49095e-05
ENSRNOG00000055277.1	LOC100362333	5:78383788-78384103	221	1.42127e-07	-6.90358	2.57279e-05
ENSRNOG00000009754.6	Nampt	6:52121765-52158460	4869	1.45523e-07	3.3232	2.62966e-05
ENSRNOG00000027151.5	Lrrc58	11:65747035-65760167	1963	1.55467e-07	53.65	2.78986e-05
ENSRNOG00000011310.8	Pde10a	1:52355919-52397690	6765	1.60652e-07	6.02717	2.87791e-05
ENSRNOG00000004091.6	Cwc25	10:85684230-85709606	6078	1.62906e-07	8.92981	2.91322e-05
ENSRNOG00000015421.6	Slc27a3	2:189760733-189764921	1884	1.67381e-07	-13.6426	2.98809e-05
ENSRNOG00000007114.6	Psma6	6:76187996-76205614	1234	1.69531e-07	-2.11314	3.02124e-05
ENSRNOG00000020288.4	Slc25a20	8:117455225-117476773	1847	1.75122e-07	42.2309	3.10482e-05
ENSRNOG00000020340.7	Brd8	18:27423608-27424989	959	1.76601e-07	18.7138	3.12034e-05
ENSRNOG00000007235.5	Atp5mc1	10:83895847-83896997	568	1.8034e-07	44.2913	3.18096e-05
ENSRNOG00000014079.7	Stat1	9:54287540-54328360	4487	1.83775e-07	-6.8475	3.23604e-05
ENSRNOG00000003220.7	H3f3b	13:99089140-99092077	2937	1.99354e-07	2.06627	3.47485e-05
ENSRNOG00000012929.6	Wsb1	10:66586904-66603270	2564	2.00548e-07	9.40351	3.48977e-05
ENSRNOG00000000521.4	Cdkn1a	20:6351457-6358864	1933	2.04788e-07	5.22387	3.54564e-05
ENSRNOG00000011421.7	Smap2	5:139885318-139931393	2873	2.0733e-07	-14.4946	3.57768e-05
ENSRNOG00000028323.6	Dhrsx	12:18516869-18521892	3246	2.09124e-07	-5.85619	3.60261e-05
ENSRNOG00000016873.6	Msrb2	17:86066829-86078704	301	2.15283e-07	-36.9815	3.70254e-05
ENSRNOG00000017447.5	Eif2s2	3:150406348-150412261	492	2.36036e-07	-4.21151	4.046e-05
ENSRNOG00000014448.8	Arntl	1:178039046-178107231	584	2.38085e-07	10.7689	4.07437e-05
ENSRNOG00000012872.7	Carnmt1	1:234674936-234705787	5110	2.43336e-07	7.56904	4.15242e-05
ENSRNOG00000031085.5	Ergic3	3:151553847-151563364	1263	2.43449e-07	-33.8719	4.15242e-05
ENSRNOG00000060262.1	Prps1	X:111798206-111820269	2010	2.51382e-07	-3.58651	4.28066e-05
ENSRNOG00000001198.4	Fam222a	12:47741676-47794918	33592	2.62368e-07	13.6053	4.44577e-05
ENSRNOG00000007356.4	Chmp3	4:99474540-99496159	2354	2.6556e-07	-70.1663	4.48514e-05
ENSRNOG00000013000.7	Ldhb	4:176701979-176717705	1211	2.85442e-07	-10.7241	4.79742e-05
ENSRNOG00000028155.6	Dnaaf2	6:91482302-91490184	5034	2.85152e-07	17.2742	4.79742e-05
ENSRNOG00000020688.6	Ccdc51	8:117820505-117830868	1563	2.90308e-07	-7.76156	4.86339e-05
ENSRNOG00000014338.6	Slc25a25	3:11442342-11476225	3349	2.94023e-07	3.57529	4.91766e-05
ENSRNOG00000052564.1	Gpx3	10:40247333-40255700	1851	3.085e-07	10.122	5.13487e-05
ENSRNOG00000009358.6	Osgin2	5:29662297-29671261	2998	3.13663e-07	5.54429	5.19569e-05
ENSRNOG00000014205.2	Klf2	16:19222420-19225122	1807	3.20439e-07	2.5854	5.29945e-05
ENSRNOG00000011066.8	Marchf6	2:84562096-84574131	985	3.2122e-07	-10.3129	5.30387e-05
ENSRNOG00000003975.6	Pfn1	10:57272995-57278346	3463	3.21894e-07	6.55565	5.30654e-05
ENSRNOG00000014743.5	Hagh	10:14215560-14230505	5623	3.365e-07	7.72436	5.51214e-05
ENSRNOG00000047768.2	Lamb2	8:117279752-117280517	593	3.36257e-07	-86.5237	5.51214e-05
ENSRNOG00000018044.6	Phyh	17:77286607-77294025	3324	3.39618e-07	-3.80164	5.5529e-05
ENSRNOG00000020361.7	Ip6k2	8:117574054-117599843	3710	3.42563e-07	-3.92612	5.58491e-05
ENSRNOG00000016220.7	Rpl12	3:12009460-12010018	464	3.46845e-07	4.42916	5.64582e-05
ENSRNOG00000021318.6	Epas1	6:10305998-10387268	5271	3.51714e-07	3.72789	5.71607e-05
ENSRNOG00000001049.7	Tpt1	15:57890044-57895290	3239	3.55848e-07	3.25343	5.77418e-05
ENSRNOG00000016638.5	Gnb1	5:172913906-172956283	338	3.87849e-07	46.8915	6.24443e-05
ENSRNOG00000013741.7	Ube2d3	2:240626337-240627732	479	4.04198e-07	2.50477	6.48744e-05
ENSRNOG00000000397.6	Ccar1	20:32374488-32383870	1460	4.07066e-07	-11.6059	6.52335e-05
ENSRNOG00000020636.7	Spint2	1:87199276-87222064	1507	4.09689e-07	2.10919	6.55521e-05
ENSRNOG00000000275.8	Fam13c	20:19359891-19383591	1594	4.10844e-07	3.91404	6.56353e-05
ENSRNOG00000017876.6	Dnajc21	2:60419362-60446687	2214	4.32482e-07	3.31514	6.89856e-05
ENSRNOG00000049497.2	Eif6	3:151356866-151363238	1348	4.35273e-07	-2.546	6.93238e-05
ENSRNOG00000001001.6	Retn	12:2201890-2204252	1223	4.39838e-07	-26.9462	6.9943e-05
ENSRNOG00000021085.8	Sf1	1:221735264-221750792	4673	4.49489e-07	7.89531	7.11494e-05
ENSRNOG00000007849.6	Zmat5	14:84938057-84960020	300	4.51658e-07	-3.79587	7.13833e-05
ENSRNOG00000005576.5	Rpia	4:98568027-98593679	1827	4.62078e-07	-50.9212	7.29187e-05
ENSRNOG00000050087.2	Mphosph6	19:50357107-50367267	1372	4.70607e-07	-3.96153	7.41514e-05
ENSRNOG00000013179.5	Tinagl1	5:148390871-148392736	484	4.71652e-07	3.80708	7.4203e-05
ENSRNOG00000008709.6	Arhgap32	8:33377764-33392309	8766	4.80424e-07	20.5431	7.54682e-05
ENSRNOG00000000796.8	Ranbp2	20:28050478-28077352	8427	4.84606e-07	9.42127	7.60097e-05
ENSRNOG00000050044.2	Ptp4a2	5:148058947-148061388	1553	4.97313e-07	-16.4194	7.77667e-05
ENSRNOG00000008015.5	Fos	6:109300432-109303845	2135	5.04739e-07	15.4509	7.85712e-05
ENSRNOG00000020029.5	Mcrip2	10:15229544-15235848	6093	5.07568e-07	-9.06494	7.88928e-05
ENSRNOG00000016087.5	Hars2	18:29629183-29638744	3420	5.14063e-07	19.0019	7.95983e-05
ENSRNOG00000058393.1	Taf15	10:70720165-70721894	485	5.22412e-07	-3.18319	8.04741e-05
ENSRNOG00000049771.1	Gstt1	20:13799056-13816578	1045	5.28676e-07	-3.5588	8.13178e-05
ENSRNOG00000017635.7	Inpp5a	1:211920565-211923969	1929	5.36622e-07	12.9569	8.24173e-05
ENSRNOG00000025235.6	Tmem130	12:11814067-11840100	2761	5.83743e-07	6.69782	8.91247e-05
ENSRNOG00000027405.6	Ccp110	1:188415075-188444995	7790	5.9127e-07	40.9777	9.0008e-05
ENSRNOG00000016936.5	Nadk	5:172986080-172999795	709	6.06923e-07	-11.1597	9.18686e-05
ENSRNOG00000029394.5	Dusp8	1:215028393-215033606	4141	6.06739e-07	3.85844	9.18686e-05
ENSRNOG00000019536.5	Smim3	18:55744576-55773282	3798	6.34727e-07	9.67756	9.49454e-05
ENSRNOG00000021031.7	Grn	10:90376932-90383212	2342	6.4493e-07	3.45804	9.63323e-05
ENSRNOG00000050169.1	Pet100	12:2170595-2173251	1231	6.91925e-07	-6.96123	0.000102758
ENSRNOG00000027405.6	Ccp110	1:188440530-188444995	1951	7.09433e-07	7.45043	0.000104906
ENSRNOG00000010737.7	Mbnl2	15:105743544-105798152	3889	7.18236e-07	2.9045	0.000105985
ENSRNOG00000030954.5	Fat1	16:50372127-50390952	4752	7.18785e-07	3.60319	0.000105985
ENSRNOG00000009513.3	Akr1b1	4:61706862-61721201	1584	7.21394e-07	-36.6527	0.000106219
ENSRNOG00000016299.3	Klf4	5:72287588-72288084	496	7.26732e-07	7.5824	0.000106852
ENSRNOG00000021202.8	Rtn3	1:222677364-222734241	2796	7.93749e-07	4.32962	0.000116046
ENSRNOG00000032463.4	Rap1a	2:208206100-208215187	407	8.10948e-07	-4.87827	0.000118393
ENSRNOG00000020851.6	Aplp1	1:88897522-88908826	2379	8.17342e-07	5.62143	0.000119158
ENSRNOG00000050183.4	RT1-CE1	20:4939614-4940254	252	8.24014e-07	42.3939	0.000119961
ENSRNOG00000038184.4	Camk2n2	11:83975366-83977488	1341	8.40218e-07	7.12767	0.000121977
ENSRNOG00000018796.5	Herpud1	19:11046548-11057347	2295	8.66253e-07	-4.15447	0.000125229
ENSRNOG00000010816.2	Kcnk15	3:160237653-160301878	5269	8.7391e-07	4.06429	0.000126159
ENSRNOG00000020325.6	Calhm2	1:266908368-266914311	2049	8.85625e-07	7.80684	0.000127494
ENSRNOG00000010389.6	Ndrg2	15:28310521-28313862	442	8.91741e-07	-43.9214	0.000128196
ENSRNOG00000016390.5	Eef1e1	17:26784942-26787794	482	1.00713e-06	-6.70586	0.000143354
ENSRNOG00000025385.3	Coa4	1:165549306-165552572	1400	1.00827e-06	-3.65444	0.000143354
ENSRNOG00000045561.1	Uqcc3	1:225076300-225077193	804	1.0078e-06	-10.1332	0.000143354
ENSRNOG00000012106.4	Dnaja4	8:59277692-59296219	9483	1.01272e-06	17.2124	0.000143788
ENSRNOG00000059110.1	AABR07068341.1	9:99557492-99566110	461	1.02714e-06	-7.9137	0.000145635
ENSRNOG00000047118.2	LOC683897	20:48276096-48294975	1131	1.02944e-06	-3.07718	0.000145762
ENSRNOG00000039528.3	Fam32a	16:19304519-19308896	2059	1.06026e-06	-2.11044	0.00014992
ENSRNOG00000021027.6	Dbp	1:101687609-101692845	3189	1.10529e-06	-37.5387	0.000156069
ENSRNOG00000045765.1	MGC94207	7:117786206-117788611	1803	1.10677e-06	-4.2831	0.000156069
ENSRNOG00000032669.5	Serpina1	6:127629186-127631686	1562	1.11404e-06	6.41794	0.000156881
ENSRNOG00000016269.7	Rpl7l1	9:16512722-16515097	301	1.16064e-06	17.2342	0.000163221
ENSRNOG00000001189.6	Sik1	20:10670522-10670943	290	1.16671e-06	7.57514	0.000163852
ENSRNOG00000004544.7	Ube2e3	3:65815040-65872225	2563	1.18935e-06	8.03815	0.000166578
ENSRNOG00000028323.6	Dhrsx	12:18516869-18521892	2326	1.19491e-06	-45.5777	0.000167131
ENSRNOG00000026884.6	Snx17	6:26541137-26543424	1197	1.22189e-06	-45.9603	0.000170443
ENSRNOG00000003689.6	Nono	X:71325148-71342271	2398	1.22367e-06	37.2502	0.000170461
ENSRNOG00000021524.4	Mrap	11:30903396-30917388	4330	1.25181e-06	3.66145	0.000173214
ENSRNOG00000024809.6	Ntmt1	3:9642999-9659630	1298	1.25057e-06	-15.7265	0.000173214
ENSRNOG00000007029.3	Dnaja1	5:57028466-57043002	5234	1.27458e-06	4.88591	0.000176129
ENSRNOG00000001465.7	Ids	8:69447360-69453546	3087	1.28851e-06	3.02992	0.000177578
ENSRNOG00000057710.1	Ccnd2	4:159670364-159692799	5610	1.29139e-06	-5.88201	0.000177739
ENSRNOG00000014480.7	Sys1	3:160911925-160913629	1704	1.36189e-06	-11.467	0.000186449
ENSRNOG00000000306.5	Smpd2	20:46211891-46215419	1965	1.38511e-06	18.627	0.000189127
ENSRNOG00000015231.6	Mrpl44	9:85542701-85549045	2443	1.47732e-06	-8.69696	0.000200132
ENSRNOG00000056297.1	Fmnl3	7:140982572-140984099	556	1.50885e-06	-37.0551	0.000203947
ENSRNOG00000013484.5	Gsta1	9:27435815-27436856	1041	1.55983e-06	-5.53583	0.000209661
ENSRNOG00000013061.6	Tusc3	16:56350346-56396502	804	1.56628e-06	-35.0991	0.000210254
ENSRNOG00000007213.5	Yars1	5:147375249-147403585	2547	1.61634e-06	-4.58757	0.000216131
ENSRNOG00000024186.4	Eef1b2	9:69955316-69956174	398	1.64682e-06	94.0557	0.000219769
ENSRNOG00000030273.5	Zfp563	7:15412216-15414458	2242	1.64779e-06	23.4207	0.000219769
ENSRNOG00000023509.6	Irs2	16:83842991-83848658	5667	1.69956e-06	7.80285	0.000226089
ENSRNOG00000015160.5	Gem	5:25346819-25353669	4742	1.72141e-06	16.1862	0.000228409
ENSRNOG00000018487.3	Slc3a2	1:224906500-224912718	2002	1.73942e-06	2.27099	0.000230207
ENSRNOG00000023733.5	RGD1560821	X:77885559-77886170	503	1.76024e-06	-2.49522	0.00023148
ENSRNOG00000032917.3	Zfand2a	12:17259365-17263479	2804	1.76833e-06	25.0856	0.000232248
ENSRNOG00000049661.2	Inafm1	1:78210249-78213329	2612	1.82292e-06	-2.85024	0.000238812
ENSRNOG00000003524.4	Lrrc59	10:82352338-82367047	2853	1.91819e-06	-3.31983	0.00025034
ENSRNOG00000003289.8	Lap3	14:70102807-70121891	2286	1.93882e-06	6.59105	0.000252714
ENSRNOG00000049939.2	AABR07066677.1	9:12343791-12347009	1220	1.96595e-06	-6.5627	0.000255928
ENSRNOG00000001068.7	Rac1	12:13090051-13112231	2751	2.02637e-06	2.77014	0.000263461
ENSRNOG00000013562.5	Ndfip1	18:31574497-31605918	750	2.03554e-06	5.62589	0.000264246
ENSRNOG00000059445.1	Aifm2	20:31347241-31353691	1671	2.03752e-06	-41.2009	0.000264246
ENSRNOG00000006789.6	Ddit3	7:70580197-70585223	1064	2.06192e-06	-12.68	0.000266407
ENSRNOG00000051706.1	Tep1	15:27751179-27752274	675	2.07564e-06	-11.04	0.000267512
ENSRNOG00000008672.7	Chmp5	5:57267232-57284461	1412	2.0837e-06	-2.32803	0.000267882
ENSRNOG00000020763.8	Snrnp70	1:101367292-101374296	3662	2.08263e-06	-4.47284	0.000267882
ENSRNOG00000002480.7	Gpr137b	17:90670231-90712175	15323	2.11141e-06	11.5909	0.000270772
ENSRNOG00000019749.7	Ube2j2	5:173380645-173387104	1073	2.1113e-06	-64.757	0.000270772
ENSRNOG00000020345.6	Slc25a42	16:20962154-20985231	2883	2.17487e-06	-6.78883	0.000278219
ENSRNOG00000045918.3	Jarid2	17:20184197-20278318	3906	2.19459e-06	8.51285	0.000280395
ENSRNOG00000011511.7	Stk24	15:106624363-106629348	4985	2.21449e-06	2.22172	0.000282588
ENSRNOG00000060054.1	Doc2b	10:63920770-63928200	7430	2.21759e-06	-33.6459	0.000282635
ENSRNOG00000011718.6	C1rl	4:157122422-157123443	558	2.26267e-06	-4.96963	0.000287884
ENSRNOG00000012036.7	Pcsk5	1:236031500-236313864	5734	2.26435e-06	4.68782	0.000287884
ENSRNOG00000013707.7	Spata13	15:41051673-41059194	1448	2.27934e-06	73.6784	0.000289434
ENSRNOG00000019422.4	Egr1	18:27658653-27661335	2682	2.36577e-06	17.424	0.000299673
ENSRNOG00000026880.6	Usp38	19:30693488-30699926	2769	2.47329e-06	4.05217	0.000312908
ENSRNOG00000003901.6	Cfap36	14:113618654-113644870	1836	2.53077e-06	2.85227	0.000319399
ENSRNOG00000014846.6	Anp32a	8:67295823-67298306	677	2.67003e-06	21.5723	0.000335423
ENSRNOG00000021732.5	Hsf1	7:117564633-117571060	3612	2.67072e-06	17.3277	0.000335423
ENSRNOG00000021984.6	Rgs7	13:93094387-93095986	588	2.71146e-06	12.5272	0.000339303
ENSRNOG00000027089.6	Ell2	2:2514471-2528050	5079	2.77042e-06	5.92492	0.000345427
ENSRNOG00000027151.5	Lrrc58	11:65746566-65762376	13047	2.80451e-06	8.66046	0.000348485
ENSRNOG00000052802.1	Aldoa	1:198228227-198230030	1113	2.80156e-06	-4.37722	0.000348485
ENSRNOG00000055023.1	AABR07006258.2	1:226258408-226259428	255	2.8919e-06	-3.44701	0.000358412
ENSRNOG00000000392.6	Supv3l1	20:32079982-32080197	215	2.91003e-06	33.9021	0.000360227
ENSRNOG00000009263.8	Ifi27	6:127327603-127334432	3006	2.93195e-06	-124.743	0.000361616
ENSRNOG00000012091.5	Ppa2	2:238544678-238606905	957	2.93525e-06	-11.1242	0.000361616
ENSRNOG00000001050.8	Eif2ak1	12:12748784-12782175	2466	2.94861e-06	-40.8416	0.00036283
ENSRNOG00000013090.7	Gadd45g	17:13391120-13393240	1914	3.06189e-06	5.70791	0.000374983
ENSRNOG00000047874.2	Nelfcd	3:172510799-172516361	500	3.06578e-06	-2.83599	0.000375016
ENSRNOG00000019466.7	Agpat2	3:4043645-4049336	2609	3.15538e-06	-6.31703	0.00038552
ENSRNOG00000017895.7	Eno1	5:167298898-167299615	717	3.34167e-06	-4.46854	0.000406837
ENSRNOG00000009766.7	Gpr180	15:103344257-103358192	6852	3.46556e-06	13.523	0.000420435
ENSRNOG00000003723.5	Wdr26	13:99493116-99533998	6395	3.54158e-06	4.38509	0.000429154
ENSRNOG00000002232.6	Aff1	14:7222877-7326763	9079	3.63994e-06	6.14167	0.0004397
ENSRNOG00000023708.6	Tmem176a	4:78457855-78464116	3542	3.67252e-06	17.9715	0.000442944
ENSRNOG00000060235.1	AABR07044837.2	20:23085933-23090043	4110	3.70414e-06	18.3029	0.000446236
ENSRNOG00000014621.7	Rab8a	16:19355038-19376908	1884	3.76173e-06	-9.1728	0.000452364
ENSRNOG00000026605.5	Ifi27l2b	6:127336300-127337287	563	3.76375e-06	-6.26519	0.000452364
ENSRNOG00000021031.7	Grn	10:90376932-90383217	2347	3.81472e-06	4.82268	0.000457426
ENSRNOG00000014656.4	Cox8b	1:213648786-213650330	402	3.86557e-06	-6.96053	0.000461382
ENSRNOG00000057464.1	Fmr1	X:154684831-154686047	1216	3.87241e-06	-33.7799	0.000461665
ENSRNOG00000046112.2	Dedd2	1:82072543-82089804	3124	3.89173e-06	8.61776	0.000463434
ENSRNOG00000010189.8	Rps24	16:759688-762090	212	4.01043e-06	-6.64089	0.000475378
ENSRNOG00000046357.2	Adh5	2:243732351-243740899	1271	4.06056e-06	-43.6355	0.00048077
ENSRNOG00000016957.5	Igfbp2	9:80117594-80144814	1013	4.0772e-06	-2.71741	0.000482187
ENSRNOG00000018818.6	Txnl1	18:59056453-59086327	4274	4.11038e-06	25.9087	0.000484445
ENSRNOG00000010524.6	Cryab	8:55178288-55182546	1249	4.20243e-06	3.43684	0.000492395
ENSRNOG00000047931.2	Tmsb4x	X:28593303-28595402	702	4.20915e-06	-4.2601	0.000492395
ENSRNOG00000021168.7	Anp32e	2:198040498-198057003	3210	4.22313e-06	-3.73516	0.000493238
ENSRNOG00000032398.4	RGD1562136	9:111335095-111347430	2593	4.23882e-06	-7.4099	0.000494511
ENSRNOG00000005413.5	Creb3l1	3:80892432-80933335	2858	4.32831e-06	5.43383	0.000503815
ENSRNOG00000009811.6	Cnih1	15:23567531-23581132	3153	4.33467e-06	4.38816	0.000503987
ENSRNOG00000009225.7	Copz2	10:106021731-106023850	320	4.34469e-06	-4.74109	0.000504585
ENSRNOG00000059381.1	Mrps6	11:32210798-32240345	11742	4.3942e-06	4.22817	0.000509762
ENSRNOG00000019282.7	Ubqln1	17:6839142-6878854	4897	4.40623e-06	2.95529	0.000510584
ENSRNOG00000018533.5	Iffo1	4:157659130-157676340	3133	4.45613e-06	-10.9086	0.000515789
ENSRNOG00000020474.6	Pin1	8:21669122-21672923	512	4.53953e-06	-7.75922	0.000524853
ENSRNOG00000031135.6	Smarcc2	7:2896671-2904687	2179	4.60316e-06	11.9488	0.00052984
ENSRNOG00000059463.1	Slc39a1	2:189609775-189615463	2532	4.62305e-06	-4.75143	0.000531538
ENSRNOG00000042592.2	Rgs10	1:199782025-199795907	1984	4.65704e-06	6.75078	0.00053485
ENSRNOG00000049629.2	Reep2	18:27639806-27641593	1482	4.72958e-06	-63.7125	0.000541978
ENSRNOG00000000701.5	Iscu	12:48620332-48627392	2140	4.84315e-06	22.4453	0.000553763
ENSRNOG00000004554.6	Dcn	7:38774341-38782323	986	4.98939e-06	-73.9457	0.000568598
ENSRNOG00000021524.4	Mrap	11:30903396-30917388	4387	5.22023e-06	2.93407	0.000593596
ENSRNOG00000005248.6	Slc1a4	14:104581186-104593134	3056	5.37246e-06	7.01212	0.000608229
ENSRNOG00000025940.3	Mettl9	1:190964700-191009934	1648	5.4725e-06	27.0547	0.000618201
ENSRNOG00000016460.7	Clu	15:42660079-42665867	1187	5.52919e-06	-48.0418	0.000623274
ENSRNOG00000022218.6	Ifi44	2:256897764-256915569	1818	5.55656e-06	10.7466	0.000625125
ENSRNOG00000005292.7	Trip11	6:125774938-125776819	589	5.58356e-06	6.85143	0.000627319
ENSRNOG00000002947.8	Dpt	13:83101738-83102405	667	5.7548e-06	-30.3084	0.000644456
ENSRNOG00000005695.5	Mgp	4:170856678-170860225	748	5.7524e-06	14.5909	0.000644456
ENSRNOG00000031391.4	Ceacam16	1:80773267-80780350	1651	5.78797e-06	4.7754	0.000647398
ENSRNOG00000003177.7	Mat2b	10:25832071-25845747	1928	5.94708e-06	-5.60192	0.000663115
ENSRNOG00000019456.6	Kars	19:44212155-44231204	2239	6.00084e-06	-4.92146	0.000668389
ENSRNOG00000061989.1	Nkrf	X:123498989-123502096	3107	6.02884e-06	4.26034	0.000670064
ENSRNOG00000002232.6	Aff1	14:7222877-7244035	6932	6.05973e-06	8.39045	0.000672773
ENSRNOG00000015222.5	Tent5c	2:202794275-202799987	5712	6.14832e-06	4.0339	0.000681876
ENSRNOG00000060235.1	AABR07044837.2	20:23078515-23090043	5450	6.19687e-06	30.2458	0.000686524
ENSRNOG00000003883.4	#N/A	20:7331316-7397588	3677	6.24426e-06	7.54919	0.000689625
ENSRNOG00000043451.4	Spp1	14:6673678-6676373	1299	6.25154e-06	64.4479	0.000689625
ENSRNOG00000020703.7	Sipa1l3	1:87260831-87293024	3292	6.53214e-06	5.59003	0.000719043
ENSRNOG00000007607.4	Nr4a1	7:142912171-142920676	3088	6.59312e-06	5.55844	0.000724034
ENSRNOG00000008048.8	Plscr1	8:99713582-99725217	1200	6.5935e-06	3.10377	0.000724034
ENSRNOG00000008533.4	Ago2	7:114328521-114377276	12915	6.73995e-06	19.7617	0.000737018
ENSRNOG00000054557.1	Lsm14b	3:175408408-175419400	2753	6.74535e-06	-3.48944	0.000737018
ENSRNOG00000060235.1	AABR07044837.2	20:23078515-23090043	5569	6.91335e-06	31.6707	0.000751403
ENSRNOG00000012084.5	Xpnpep1	1:273708189-273712652	689	7.18183e-06	-50.9574	0.000779764
ENSRNOG00000052113.1	Ppp1r9b	10:82806063-82816740	2737	7.27428e-06	-5.62163	0.000787946
ENSRNOG00000001239.6	Ddt	20:13824501-13832045	5682	7.29595e-06	-2.43931	0.00078884
ENSRNOG00000021120.5	Prune1	2:196456128-196462649	1374	7.36726e-06	-4.1385	0.000794059
ENSRNOG00000046112.2	Dedd2	1:82072543-82089804	3754	7.39573e-06	6.63825	0.000796297
ENSRNOG00000005413.5	Creb3l1	3:80892432-80901803	1859	7.45376e-06	11.7004	0.000800044
ENSRNOG00000003714.6	Clk4	10:36716427-36734126	4380	7.7494e-06	-4.83602	0.000825774
ENSRNOG00000011039.7	Gch1	15:23937798-23969035	714	7.88412e-06	66.2833	0.000838401
ENSRNOG00000002186.4	Nudt9	14:7036808-7043047	703	7.96003e-06	-15.3009	0.000844736
ENSRNOG00000053210.1	Zc3h11a	13:50231022-50238130	4263	8.28621e-06	5.82765	0.00087665
ENSRNOG00000017506.7	Cltb	17:10536748-10555966	2586	8.59919e-06	25.9474	0.000904209
ENSRNOG00000002232.6	Aff1	14:7222870-7260616	11159	8.63855e-06	10.7786	0.000907425
ENSRNOG00000030111.4	Cyp11b3	7:116254193-116255228	665	8.77297e-06	-6.12608	0.000920609
ENSRNOG00000014204.7	Pacsin3	3:80080081-80081064	691	8.84925e-06	-15.7496	0.000927673
ENSRNOG00000061989.1	Nkrf	X:123504231-123516273	848	9.26334e-06	6.80256	0.000965209
ENSRNOG00000028733.6	Prkar1b	12:17679824-17713567	1791	9.3197e-06	9.40339	0.000970102
ENSRNOG00000048193.2	Hnrnph3	20:27167955-27212772	1612	9.50796e-06	-6.02868	0.000988704
ENSRNOG00000056870.1	Gdi1	X:156400619-156407816	3893	9.57378e-06	-2.38358	0.000994547
ENSRNOG00000057823.1	Ubc	12:36640930-36643754	2824	9.84804e-06	3.16915	0.00101792
ENSRNOG00000037909.2	Ppm1f	11:88336738-88343707	568	9.90375e-06	-10.4425	0.00102164
ENSRNOG00000007611.5	Hoxb7	10:84137696-84138642	946	9.96024e-06	-8.79616	0.00102644
ENSRNOG00000002262.3	Enoph1	14:11171897-11198348	2305	1.03053e-05	5.70725	0.00105778
ENSRNOG00000056457.1	Gpd1	7:141369472-141378955	4068	1.04376e-05	-8.47468	0.0010703
ENSRNOG00000005331.4	Vapb	3:171864514-171874639	6607	1.05485e-05	-31.3447	0.0010806
ENSRNOG00000005195.6	Cst3	3:143219665-143223623	813	1.05769e-05	2.91076	0.00108243
ENSRNOG00000016596.3	Hspa4	10:38601622-38644081	12939	1.06432e-05	30.8464	0.00108814
ENSRNOG00000013794.4	Rbp1	8:106449220-106470845	799	1.09506e-05	3.79329	0.00111847
ENSRNOG00000019450.5	Etf1	18:27696484-27701850	3352	1.10917e-05	2.09181	0.00113176
ENSRNOG00000017340.5	Wdr12	9:66874967-66878210	370	1.12501e-05	-29.5751	0.00114679
ENSRNOG00000046057.2	Pnmt	10:86340027-86344445	3754	1.1317e-05	3.5775	0.00115248
ENSRNOG00000050343.3	Jmy	2:23057250-23058116	866	1.13324e-05	17.1417	0.0011529
ENSRNOG00000047706.3	LOC103690108	20:3791839-3793896	920	1.16757e-05	27.0881	0.00118317
ENSRNOG00000056889.1	Vps33a	12:38459805-38461963	322	1.22253e-05	-5.63913	0.00123523
ENSRNOG00000002461.7	Nid1	17:90545818-90560951	12121	1.23228e-05	5.91757	0.00124387
ENSRNOG00000018233.6	Gas6	16:81231296-81244024	731	1.23763e-05	6.06905	0.00124805
ENSRNOG00000019466.7	Agpat2	3:4043645-4056563	3016	1.24216e-05	-3.74823	0.00125021
ENSRNOG00000004992.7	Rab1a	14:104497805-104501268	3302	1.245e-05	3.76322	0.00125182
ENSRNOG00000027888.6	Cmss1	11:45304067-45330494	983	1.26631e-05	-5.63397	0.00126954
ENSRNOG00000000909.8	Uspl1	12:6930015-6956984	3494	1.28412e-05	3.34889	0.0012849
ENSRNOG00000048088.2	Mest	4:58052626-58064963	3240	1.29063e-05	3.17513	0.00129017
ENSRNOG00000007895.5	Pdhb	15:18540912-18547058	1990	1.2928e-05	32.3613	0.00129109
ENSRNOG00000005924.6	Dstn	3:138050314-138051605	1291	1.29723e-05	-3.40208	0.00129426
ENSRNOG00000010038.6	Psmc5	10:94445835-94449892	320	1.32888e-05	-59.6631	0.00132329
ENSRNOG00000004196.7	LOC108352650	6:91455326-91456890	505	1.35145e-05	2.66346	0.00134188
ENSRNOG00000000988.4	Xab2	12:2158388-2158725	254	1.35643e-05	-38.9031	0.00134553
ENSRNOG00000011979.6	Mrps24	14:85947762-85951936	833	1.36058e-05	-2.74428	0.00134836
ENSRNOG00000000661.5	Hps4	12:50295102-50315820	1280	1.37501e-05	5.03872	0.00136005
ENSRNOG00000058470.1	Col12a1	8:87040778-87069132	3553	1.37894e-05	3.61645	0.00136264
ENSRNOG00000004821.6	Sntb1	7:95395406-95439671	3477	1.45415e-05	11.6904	0.00143035
ENSRNOG00000051170.2	Ddx17	7:120759577-120780641	5567	1.45068e-05	3.6213	0.00143035
ENSRNOG00000005183.6	Rtf1	3:111478342-111524018	1308	1.47519e-05	-12.4984	0.00144806
ENSRNOG00000014448.8	Arntl	1:178109131-178137465	2242	1.4741e-05	12.8716	0.00144806
ENSRNOG00000040287.4	Cyp1b1	6:2294161-2316295	19104	1.4858e-05	4.80679	0.00145433
ENSRNOG00000027145.6	Rora	8:75601993-75616477	9970	1.49897e-05	30.3173	0.00146444
ENSRNOG00000028155.6	Dnaaf2	6:91480789-91490366	6498	1.52304e-05	17.2631	0.00148515
ENSRNOG00000003399.8	Hnrnph1	10:35870969-35880334	2890	1.53877e-05	2.85699	0.00149485
ENSRNOG00000027906.7	Ankrd11	19:55703823-55737503	8826	1.56032e-05	2.81143	0.00151294
ENSRNOG00000019381.9	Eri3	5:136510529-136533235	489	1.57339e-05	14.9493	0.00152419
ENSRNOG00000015591.5	Cndp2	18:81521965-81522642	677	1.5794e-05	-30.5231	0.00152857
ENSRNOG00000016298.7	Lysmd3	2:9526113-9535367	4263	1.59867e-05	2.66527	0.00154578
ENSRNOG00000055246.1	Ncor1	10:48690155-48710906	940	1.63492e-05	-40.267	0.00157787
ENSRNOG00000012123.3	Fdx1	8:56372876-56393670	6336	1.64456e-05	2.8043	0.00158422
ENSRNOG00000046662.2	Ints6l	X:158881425-158887057	3027	1.69358e-05	-6.34956	0.0016284
ENSRNOG00000018091.6	Gdi2	17:70313141-70325988	960	1.70636e-05	2.73929	0.00163415
ENSRNOG00000057710.1	Ccnd2	4:159670360-159697546	6277	1.72018e-05	3.26314	0.00164328
ENSRNOG00000014846.6	Anp32a	8:67295557-67298310	816	1.72623e-05	-13.1497	0.00164602
ENSRNOG00000010381.7	Mknk1	5:134708474-134730896	2863	1.73302e-05	-5.6242	0.00165097
ENSRNOG00000031216.3	AABR07055776.1	7:9975583-9976294	294	1.7439e-05	10.9066	0.00165828
ENSRNOG00000053468.1	Tuba1b	7:140614740-140616199	1294	1.74906e-05	3.93266	0.00166166
ENSRNOG00000010819.6	Hspa4l	2:127626930-127683559	9832	1.76352e-05	5.13136	0.00167078
ENSRNOG00000002946.3	Socs3	10:106973872-106977009	2576	1.76913e-05	5.44192	0.00167457
ENSRNOG00000018403.7	Atg4b	9:100900698-100920301	3054	1.78518e-05	18.9919	0.00168821
ENSRNOG00000038218.3	Ndufc1	2:140458589-140464890	3042	1.78798e-05	5.30401	0.00168932
ENSRNOG00000018164.6	Spcs2	1:164839322-164849774	251	1.79183e-05	-17.7025	0.00169004
ENSRNOG00000042421.1	RGD1559909	5:142840815-142845494	4208	1.89196e-05	15.1326	0.00176657
ENSRNOG00000016180.5	Pdp1	5:25577592-25584335	2572	1.97658e-05	-7.24806	0.00183563
ENSRNOG00000000506.7	Tead3	20:7905829-7909511	3387	2.00029e-05	4.27146	0.00185598
ENSRNOG00000011814.7	Cbx3	4:81243489-81245729	1101	2.04855e-05	3.2867	0.00189735
ENSRNOG00000005964.5	Nr4a3	5:63781100-63822951	6408	2.11309e-05	3.41127	0.00195363
ENSRNOG00000052111.1	Sugp1	16:21100835-21103460	954	2.17198e-05	-14.7538	0.00200448
ENSRNOG00000018281.6	Uqcrfs1	17:35681286-35683345	2059	2.19486e-05	-2.3364	0.00202187
ENSRNOG00000022392.3	Hspb8	12:45916857-45920906	4049	2.19384e-05	6.89228	0.00202187
ENSRNOG00000003927.7	Cd55	13:47126727-47127913	1186	2.22271e-05	10.019	0.00204389
ENSRNOG00000016478.7	Eif5a	10:56527791-56531487	592	2.28076e-05	24.3827	0.00209181
ENSRNOG00000008487.7	Amotl2	8:111216408-111226226	3466	2.28859e-05	4.95814	0.00209713
ENSRNOG00000033169.5	Cpeb4	10:15984314-16048305	19863	2.3162e-05	7.41781	0.00211867
ENSRNOG00000029415.4	RGD1565784	10:14543186-14545000	1735	2.3382e-05	-8.53333	0.00213502
ENSRNOG00000007327.5	Pars2	5:126254126-126258280	2216	2.34262e-05	-3.93249	0.00213612
ENSRNOG00000014997.4	Igf2r	1:48262747-48264482	1735	2.34354e-05	10.2161	0.00213612
ENSRNOG00000004723.5	Fcf1	6:108796415-108797736	1321	2.36568e-05	-14.013	0.0021525
ENSRNOG00000046207.1	Cbx4	10:108189285-108196389	3329	2.37172e-05	2.85932	0.0021561
ENSRNOG00000043451.4	Spp1	14:6673678-6680034	1607	2.41253e-05	4.96905	0.00218934
ENSRNOG00000012012.5	Pinx1	15:47211568-47270330	1331	2.44372e-05	-5.108	0.0022157
ENSRNOG00000020452.7	Nsmce4a	1:201096032-201101117	639	2.45519e-05	-11.7375	0.00222415
ENSRNOG00000005963.7	Rab2a	5:21670739-21697784	2826	2.46298e-05	-3.83554	0.0022273
ENSRNOG00000017116.7	Zfp532	18:61364909-61368423	2558	2.49754e-05	4.65341	0.00225264
ENSRNOG00000012404.6	Thrsp	1:162381246-162385579	901	2.5118e-05	-10.0031	0.00225763
ENSRNOG00000008074.6	Cyp11a1	8:62795785-62811028	5491	2.53902e-05	18.8384	0.00227813
ENSRNOG00000018610.6	Pde6d	9:93562094-93607111	1169	2.54208e-05	-10.6828	0.0022789
ENSRNOG00000006086.7	Lynx1	7:115982763-115988090	4288	2.55074e-05	-20.7912	0.00228468
ENSRNOG00000016896.8	Rpl3	7:121297354-121301993	1297	2.57416e-05	36.7793	0.00230246
ENSRNOG00000018691.7	Aurkaip1	5:173257469-173268273	6363	2.57504e-05	-6.85937	0.00230246
ENSRNOG00000024336.5	Senp6	8:87485316-87540470	3009	2.63762e-05	8.44648	0.00235028
ENSRNOG00000013305.8	Atp2c1	8:113995212-114013516	815	2.65141e-05	4.01007	0.0023585
ENSRNOG00000042482.1	Tatdn2	4:145653295-145669343	3181	2.67895e-05	24.8159	0.00238095
ENSRNOG00000043388.3	Irf3	1:100992229-100998133	3370	2.81097e-05	-3.39158	0.00248546
ENSRNOG00000021984.6	Rgs7	13:93094488-93095878	379	2.88978e-05	5.46575	0.0025486
ENSRNOG00000013622.5	AABR07032821.1	18:84443530-84444218	688	2.89976e-05	-8.24693	0.00255304
ENSRNOG00000048719.2	Dtnbp1	17:20090138-20099885	341	2.89825e-05	-24.7058	0.00255304
ENSRNOG00000030019.4	Atp1a1	2:204003737-204004222	485	2.90601e-05	-14.672	0.00255638
ENSRNOG00000005825.8	Lyz2	7:60335966-60337647	944	2.9384e-05	-10.5746	0.00258267
ENSRNOG00000056728.1	G6pd	X:156288205-156294085	3744	2.95362e-05	-4.81164	0.00259384
ENSRNOG00000047014.3	Homer1	2:22908791-22976735	14165	2.964e-05	9.30902	0.00260074
ENSRNOG00000020271.5	Tial1	1:199844154-199851578	2216	2.97576e-05	-5.66168	0.00260718
ENSRNOG00000050585.2	Pgam1	1:261158149-261166018	2063	2.97638e-05	3.19085	0.00260718
ENSRNOG00000020246.7	Myl9	3:152863308-152863969	661	2.97905e-05	-42.7726	0.00260731
ENSRNOG00000062108.1	Tomm5	5:60655708-60658569	661	2.99479e-05	-2.6625	0.00261445
ENSRNOG00000026497.4	Pigc	13:79886831-79889304	1558	3.04074e-05	-5.23933	0.00265008
ENSRNOG00000019831.5	Samd4b	1:85323955-85360456	2896	3.05356e-05	16.7088	0.00265678
ENSRNOG00000000481.8	Cuta	20:5531943-5533586	1081	3.08799e-05	13.9869	0.00267547
ENSRNOG00000003229.8	Tspan7	X:13261482-13275445	1451	3.083e-05	-48.15	0.00267547
ENSRNOG00000010989.8	Ipo5	15:106291386-106293397	1553	3.18843e-05	-47.3499	0.00275097
ENSRNOG00000050523.2	AABR07049579.2	5:129370823-129457861	471	3.21574e-05	-18.8271	0.0027699
ENSRNOG00000008103.7	Mdh1	14:106378028-106388590	2131	3.21952e-05	-14.0496	0.00277085
ENSRNOG00000000164.4	Lamp2	X:124728566-124766087	5281	3.33098e-05	2.25088	0.00285925
ENSRNOG00000004538.5	Brd1	7:129676118-129703739	2964	3.33666e-05	-17.7539	0.00285976
ENSRNOG00000011260.7	Cmbl	2:84644967-84666835	1247	3.36454e-05	2.2815	0.0028743
ENSRNOG00000019584.6	Dlk1	6:133581239-133583924	1091	3.36474e-05	2.42808	0.0028743
ENSRNOG00000028266.4	Lrrc55	3:72593569-72594339	770	3.36169e-05	-27.9955	0.0028743
ENSRNOG00000039902.4	Lbh	6:24159844-24181866	845	3.37714e-05	11.785	0.00288045
ENSRNOG00000052025.1	Tle5	7:11013671-11014328	537	3.37752e-05	-5.16788	0.00288045
ENSRNOG00000054344.1	Ier2	19:25774142-25775659	1517	3.43683e-05	2.36023	0.0029238
ENSRNOG00000059461.1	B4galt1	5:57120025-57139404	3479	3.49497e-05	-3.61287	0.00296837
ENSRNOG00000021380.5	Fads6	10:103827362-103848266	7502	3.54942e-05	2.18268	0.00300721
ENSRNOG00000033433.4	Csrnp1	8:128659883-128672355	2955	3.61722e-05	3.1987	0.00306213
ENSRNOG00000015300.7	Spsb3	10:14248076-14253839	2130	3.76364e-05	27.0454	0.00317827
ENSRNOG00000030639.5	Usp13	2:119193207-119198169	4962	3.81556e-05	21.4583	0.00321163
ENSRNOG00000007766.6	Pqbp1	X:15451843-15453130	842	3.86794e-05	-43.366	0.00325042
ENSRNOG00000042825.2	Cd300le	10:103581122-103590698	1083	3.89353e-05	30.9812	0.00326927
ENSRNOG00000025371.5	Spry1	2:124400688-124405330	2191	3.90312e-05	8.31069	0.00327466
ENSRNOG00000015079.7	Ddost	5:156672042-156677535	2908	3.92933e-05	-5.23619	0.00329398
ENSRNOG00000012886.4	Maff	7:120580616-120595691	5663	3.95421e-05	7.06189	0.00331215
ENSRNOG00000019730.7	Inppl1	1:166898917-166902098	1344	3.97951e-05	3.40926	0.00332795
ENSRNOG00000016398.6	Clstn1	5:166586087-166601686	3524	4.00826e-05	3.20399	0.00334657
ENSRNOG00000000841.7	Ddx39b	20:4822839-4824995	341	4.01199e-05	-28.1227	0.00334699
ENSRNOG00000004284.4	Btg1	7:37812320-37816539	4219	4.03105e-05	5.64631	0.00336017
ENSRNOG00000009205.6	Lmo4	2:250235258-250235817	559	4.04175e-05	-3.34611	0.00336638
ENSRNOG00000008830.7	Nfe2l1	10:84683433-84699369	7976	4.11225e-05	-2.17762	0.00342234
ENSRNOG00000015055.6	Scg2	9:85237459-85243001	2527	4.1424e-05	6.33454	0.00343636
ENSRNOG00000001136.6	Pebp1	12:45026885-45032553	2504	4.17533e-05	3.16967	0.00345536
ENSRNOG00000059653.1	Rpp25l	5:58096212-58097582	765	4.17084e-05	-43.4196	0.00345536
ENSRNOG00000001083.7	Kdelr2	12:13192450-13210812	1847	4.18555e-05	2.45799	0.00346105
ENSRNOG00000002911.5	Alb	14:19176273-19183355	1158	4.20422e-05	-19.4896	0.00347371
ENSRNOG00000018778.7	Cadm1	8:52127631-52191640	3771	4.22782e-05	2.70629	0.00348763
ENSRNOG00000012873.8	Gfm1	2:164644694-164646510	729	4.35525e-05	-13.7293	0.00358989
ENSRNOG00000005346.7	Tmem128	14:77270770-77279831	1133	4.40935e-05	43.2975	0.00363158
ENSRNOG00000018153.6	Rbm5	8:116502723-116509267	1855	4.43187e-05	-9.51603	0.00364722
ENSRNOG00000015079.7	Ddost	5:156673930-156677535	2551	4.45121e-05	-11.0282	0.00365731
ENSRNOG00000021748.7	Las1l	X:65081590-65081965	375	4.57088e-05	-21.8316	0.00374373
ENSRNOG00000001198.4	Fam222a	12:47741676-47794178	8939	4.5933e-05	2.71651	0.00375912
ENSRNOG00000015055.6	Scg2	9:85237457-85243001	2529	4.63306e-05	4.5742	0.00378567
ENSRNOG00000020410.5	Th	1:216073010-216080418	3229	4.63805e-05	2.97408	0.00378675
ENSRNOG00000021637.6	Ddx46	17:9471317-9484457	7276	4.64713e-05	3.87	0.00379117
ENSRNOG00000020480.5	Fads1	1:226243508-226250215	5487	4.65287e-05	-23.553	0.00379286
ENSRNOG00000053577.1	Gramd1b	8:44162345-44176819	8965	4.7034e-05	2.0586	0.003825
ENSRNOG00000016585.7	Bmi1	17:85367288-85370281	2683	4.74198e-05	-9.55361	0.00385031
ENSRNOG00000006700.7	Wdyhv1	7:97957002-97977180	1473	4.95098e-05	4.39836	0.00400429
ENSRNOG00000003977.5	Dusp1	10:16970577-16973424	2250	4.96115e-05	7.18468	0.00400938
ENSRNOG00000019041.6	Psme1	15:34257166-34258950	823	4.96757e-05	-24.6309	0.00401143
ENSRNOG00000058096.1	AABR07021704.1	13:86632441-86671515	2264	5.00702e-05	6.95032	0.00403697
ENSRNOG00000008758.5	Tspan18	3:82200154-82236685	480	5.01565e-05	4.70905	0.00403987
ENSRNOG00000014525.5	Hspd1	9:61687895-61691060	1413	5.01842e-05	4.84886	0.00403987
ENSRNOG00000059579.1	Gpt2	19:22619105-22632086	618	5.07987e-05	-25.0226	0.00408616
ENSRNOG00000001517.6	Pdk1	3:58545524-58561661	4346	5.09208e-05	-5.20556	0.00409279
ENSRNOG00000009281.7	Commd1	14:107728611-107754735	7629	5.11437e-05	2.7417	0.00410432
ENSRNOG00000000123.6	Rnf19b	5:147246029-147269593	2394	5.14821e-05	6.568	0.00412507
ENSRNOG00000011668.6	Nfil3	17:12264073-12277152	4779	5.15607e-05	8.66192	0.00412817
ENSRNOG00000025443.4	Map1lc3a	3:150801186-150802941	1077	5.2035e-05	3.77337	0.00416292
ENSRNOG00000014525.5	Hspd1	9:61680340-61683967	1674	5.28098e-05	3.02705	0.00421187
ENSRNOG00000003975.6	Pfn1	10:57272998-57278346	4827	5.29066e-05	-5.32476	0.00421634
ENSRNOG00000002254.6	Tmem33	14:42535701-42559432	5212	5.31565e-05	2.66257	0.00422972
ENSRNOG00000005353.6	Rybp	4:132689361-132741594	4559	5.368e-05	7.56639	0.00425853
ENSRNOG00000009263.8	Ifi27	6:127331882-127334432	2145	5.38101e-05	-6.1337	0.00426531
ENSRNOG00000005392.3	Ngfr	10:83389827-83408066	3278	5.48116e-05	17.9272	0.00433473
ENSRNOG00000020194.7	Hes6	9:98549526-98551452	1532	5.60877e-05	-4.75246	0.00443225
ENSRNOG00000036894.4	Cisd3	10:85628478-85631657	610	5.63394e-05	27.6979	0.00444874
ENSRNOG00000007237.7	Id2	6:44359426-44361999	1474	5.69122e-05	-2.22751	0.00449055
ENSRNOG00000043225.3	Zfp771	1:198690316-198700969	1055	5.87439e-05	4.90486	0.00463154
ENSRNOG00000000657.7	Nek7	13:55485521-55561753	3999	6.04943e-05	-30.0021	0.00476228
ENSRNOG00000004730.7	Meis2	3:107760620-107771168	7797	6.16688e-05	26.0465	0.00483633
ENSRNOG00000019791.7	Sipa1l2	19:58235972-58268525	3113	6.16688e-05	14.2153	0.00483633
ENSRNOG00000002373.8	Akap1	10:76151017-76184115	3805	6.17392e-05	-4.42973	0.00483817
ENSRNOG00000008167.5	Abhd6	15:18664394-18695242	456	6.18881e-05	-11.7677	0.00483884
ENSRNOG00000002452.6	Txndc11	10:4578433-4635953	3108	6.24981e-05	-23.5638	0.00485349
ENSRNOG00000007434.8	Ube2j1	5:48281173-48292699	3105	6.24708e-05	3.44352	0.00485349
ENSRNOG00000011523.8	Macroh2a1	17:9282655-9344714	3718	6.24981e-05	24.8173	0.00485349
ENSRNOG00000012166.7	Adal	3:113104613-113120141	12853	6.23687e-05	-6.13868	0.00485349
ENSRNOG00000012852.8	Bin1	18:25163554-25222138	7775	6.24981e-05	-24.4278	0.00485349
ENSRNOG00000015133.6	Kmt2a	8:49110378-49185879	16402	6.23578e-05	5.19754	0.00485349
ENSRNOG00000016342.4	Atg10	2:20018379-20022837	4458	6.24981e-05	21.4851	0.00485349
ENSRNOG00000018358.4	Nt5dc2	16:7220433-7221477	539	6.23796e-05	-27.1472	0.00485349
ENSRNOG00000022500.4	Rwdd4	16:47874615-47874944	329	6.24981e-05	-24.2191	0.00485349
ENSRNOG00000053234.1	Cnot3	1:64130907-64141052	2392	6.26524e-05	-3.94505	0.00486182
ENSRNOG00000020289.6	Akt1s1	1:100845302-100851960	1841	6.27686e-05	-25.0846	0.00486718
ENSRNOG00000006180.7	Pum2	6:33786089-33865925	6509	6.30027e-05	4.17718	0.00487919
ENSRNOG00000047339.3	Pja1	X:69213643-69218598	2708	6.33252e-05	2.21684	0.00489932
ENSRNOG00000059268.2	Ppp1r10	20:3329513-3344167	4411	6.38025e-05	14.8929	0.00492886
ENSRNOG00000017354.6	Zyx	4:71740331-71749575	3080	6.39955e-05	4.24121	0.00494008
ENSRNOG00000054557.1	Lsm14b	3:175408388-175418569	2059	6.45672e-05	5.80004	0.0049805
ENSRNOG00000021808.4	Tecr	19:24705477-24732024	1755	6.47814e-05	-3.6686	0.00499329
ENSRNOG00000017751.8	Arl6ip1	1:187770154-187779716	2162	6.49716e-05	-2.28249	0.00500422
ENSRNOG00000000909.8	Uspl1	12:6930015-6957005	3684	6.64179e-05	7.16346	0.00510041
ENSRNOG00000023257.5	Adamts9	4:124660254-124686040	2924	6.81037e-05	5.75068	0.00521824
ENSRNOG00000018761.6	Eif3c	1:197963731-197982651	3761	6.83435e-05	4.97213	0.00523273
ENSRNOG00000051682.1	Zcchc9	2:20909728-20919820	1635	6.87159e-05	39.4898	0.00525346
ENSRNOG00000006787.6	Dhcr24	5:126164582-126191821	4571	6.94872e-05	26.009	0.00530458
ENSRNOG00000016885.6	Klf6	17:67895922-67904929	4217	7.10205e-05	2.55879	0.00540567
ENSRNOG00000007998.5	Ssb	3:56092454-56098290	702	7.11093e-05	-34.9876	0.00540844
ENSRNOG00000049629.2	Reep2	18:27639806-27641593	1613	7.13488e-05	-40.2612	0.00541868
ENSRNOG00000005600.7	Nr4a2	3:43111239-43128554	3351	7.15892e-05	5.24471	0.00542896
ENSRNOG00000045740.2	Tmx3	18:87610080-87613825	3745	7.15834e-05	-4.63521	0.00542896
ENSRNOG00000006037.8	Snap25	3:129753677-129767336	234	7.2669e-05	7.68184	0.00550681
ENSRNOG00000003689.6	Nono	X:71335179-71342225	1989	7.33408e-05	-28.1162	0.00554552
ENSRNOG00000053468.1	Tuba1b	7:140614621-140638742	1379	7.41571e-05	4.46307	0.00560315
ENSRNOG00000059579.1	Gpt2	19:22598109-22632079	4878	7.42547e-05	7.11522	0.00560642
ENSRNOG00000020996.8	Vps51	1:221430647-221434342	2106	7.52464e-05	7.95649	0.00567301
ENSRNOG00000013408.5	Npas2	9:46041618-46081883	3840	7.5499e-05	8.66956	0.0056879
ENSRNOG00000049517.1	Tnfaip3	1:14401102-14412807	4255	7.57929e-05	6.26143	0.00570173
ENSRNOG00000001730.6	Acap2	11:73175561-73194215	5099	7.67628e-05	-5.29757	0.0057705
ENSRNOG00000027513.6	Rtel1	3:176850731-176856531	2370	7.7663e-05	-21.477	0.00582546
ENSRNOG00000003515.6	Ephx1	13:99271365-99273884	701	7.79414e-05	-28.4511	0.00583364
ENSRNOG00000011653.6	Washc2c	4:148195261-148197365	602	7.789e-05	-11.2245	0.00583364
ENSRNOG00000020487.6	Coa3	10:89198748-89199751	738	7.78948e-05	-10.6168	0.00583364
ENSRNOG00000016800.7	Ss18	18:6020115-6030098	2409	7.86137e-05	8.16017	0.00587545
ENSRNOG00000025764.5	AC128848.1	19:11302371-11303183	350	7.8715e-05	-2.39666	0.00587877
ENSRNOG00000004327.8	Ddc	14:91905918-91989332	5133	7.95502e-05	4.16874	0.00593257
ENSRNOG00000011414.5	Psmc3	3:79876937-79882329	1636	8.01605e-05	-5.75823	0.00596948
ENSRNOG00000021181.5	Sf3b4	2:198316806-198317593	787	8.03526e-05	-3.99613	0.00597947
ENSRNOG00000027145.6	Rora	8:75576082-75616478	10840	8.14189e-05	4.11736	0.00604576
ENSRNOG00000060448.1	Hand2	16:36373342-36374446	1104	8.2165e-05	3.49684	0.00608804
ENSRNOG00000013516.6	Sf3b1	9:61593390-61608446	4399	8.25141e-05	-19.0279	0.00610953
ENSRNOG00000012343.5	Pdp2	19:597166-601554	2461	8.26993e-05	3.62611	0.00611886
ENSRNOG00000029028.5	Mknk2	7:11908060-11919342	3878	8.40143e-05	7.01857	0.00620727
ENSRNOG00000013165.4	Bet1l	1:213602849-213605667	1404	8.44858e-05	-3.9058	0.00622875
ENSRNOG00000018683.5	Dock1	1:207366902-207414852	2713	8.43808e-05	12.627	0.00622875
ENSRNOG00000007478.4	Cry2	3:81314148-81344134	3994	8.48147e-05	-4.58153	0.00624854
ENSRNOG00000003977.5	Dusp1	10:16970577-16973424	2363	8.81868e-05	5.93245	0.00648311
ENSRNOG00000014648.6	Efnb2	16:86630335-86675291	5214	8.9601e-05	4.68104	0.00657305
ENSRNOG00000036852.3	Pcbp2	7:144092662-144102026	2055	8.95581e-05	-47.2218	0.00657305
ENSRNOG00000023816.5	Aph1a	2:198006133-198009404	1466	9.07979e-05	10.4368	0.006642
ENSRNOG00000011611.8	Mapk1ip1l	15:24090255-24103350	3917	9.11374e-05	2.78675	0.00666212
ENSRNOG00000008709.6	Arhgap32	8:33377764-33392309	8769	9.18004e-05	11.4672	0.0067011
ENSRNOG00000018279.7	Sfxn1	17:11045760-11048576	2105	9.19636e-05	17.6984	0.00670828
ENSRNOG00000009734.4	Akr1b8	4:61771969-61785993	2708	9.24237e-05	2.60039	0.00673708
ENSRNOG00000013747.6	Sh3bp2	14:81435439-81437924	1326	9.24968e-05	-5.53101	0.00673766
ENSRNOG00000017866.5	Sirt5	17:23999047-24013881	1223	9.57656e-05	-19.0106	0.00695616
ENSRNOG00000053534.1	Snora78	10:14087342-14088014	437	9.71236e-05	-3.1001	0.00703996
ENSRNOG00000052968.1	Hnrnpa3	3:62483767-62484203	436	9.75437e-05	8.74271	0.00706051
ENSRNOG00000009997.5	Erap1	2:1410915-1415237	283	9.96106e-05	-10.5588	0.00720003
ENSRNOG00000026605.5	Ifi27l2b	6:127336300-127337825	598	0.000100002	-2.50193	0.00722325
ENSRNOG00000021729.6	Iqub	4:51579263-51583350	4087	0.000101188	21.9201	0.00729874
ENSRNOG00000048848.2	Ccdc9	1:78212601-78226365	3968	0.000102207	6.36364	0.00736198
ENSRNOG00000001773.7	Senp2	11:82627972-82632586	2643	0.00010306	2.25082	0.0073976
ENSRNOG00000045791.2	Eif4a3	10:108415200-108418738	576	0.000102952	-39.5407	0.0073976
ENSRNOG00000050343.3	Jmy	2:23068949-23097703	1581	0.000102954	9.19345	0.0073976
ENSRNOG00000005195.6	Cst3	3:143219665-143223626	816	0.000103214	5.94223	0.00740358
ENSRNOG00000013816.5	Cmas	4:177007429-177012448	1028	0.000103581	-9.01016	0.00742472
ENSRNOG00000005292.7	Trip11	6:125740987-125751025	6824	0.000104794	4.98384	0.00750123
ENSRNOG00000014454.5	Ap1m1	16:19288285-19303944	2120	0.000104984	-2.58694	0.00750969
ENSRNOG00000057078.1	Ddit4	20:29509282-29511392	1736	0.000107439	3.44904	0.00766408
ENSRNOG00000046623.2	AABR07068455.1	9:105943446-105944204	758	0.000108025	-8.35198	0.00769526
ENSRNOG00000028323.6	Dhrsx	12:18516778-18521892	1857	0.000108695	26.5341	0.00773229
ENSRNOG00000007433.8	Cyb561	10:94136990-94143476	2666	0.000109927	5.31482	0.00781455
ENSRNOG00000006500.6	Snf8	10:83856650-83868632	835	0.000110185	5.46545	0.00782755
ENSRNOG00000007134.6	Strap	4:171740066-171745738	1750	0.000110676	-3.41248	0.00785163
ENSRNOG00000007407.6	Ndufa12	7:35125307-35163188	764	0.000111962	4.38166	0.00791566
ENSRNOG00000020261.6	Fam53c	18:27558712-27572630	4128	0.000112228	2.26024	0.00792904
ENSRNOG00000043328.3	Chmp2a	1:65541083-65543798	1114	0.000112963	3.9905	0.00797082
ENSRNOG00000005513.7	Srsf5	6:104611020-104615303	2154	0.000113466	37.4925	0.00800013
ENSRNOG00000008224.6	Jdp2	6:109465823-109505594	1826	0.000113949	4.31144	0.0080287
ENSRNOG00000049430.2	Mpv17	6:26587126-26587512	386	0.000114295	-17.9838	0.00804759
ENSRNOG00000006004.6	Phc2	5:146907113-146931773	3196	0.000114806	8.56296	0.00807258
ENSRNOG00000000490.7	Rps10	20:7215773-7220427	590	0.000116094	3.62279	0.00814102
ENSRNOG00000018529.7	Csnk1g2	7:11944946-11963499	2487	0.000118696	30.5907	0.00830613
ENSRNOG00000016356.7	Got1	1:263245203-263254741	3765	0.000118954	4.0296	0.00831333
ENSRNOG00000004693.8	Pbx1	13:86386170-86424627	5988	0.000119812	-6.09775	0.00835838
ENSRNOG00000008289.7	Slc25a3	7:31816029-31824152	2227	0.000120001	9.63359	0.00835838
ENSRNOG00000020298.6	Bag3	1:199958068-199965191	2063	0.000120003	5.01403	0.00835838
ENSRNOG00000011154.6	Adgrf5	9:20091118-20095461	4343	0.000120304	-5.22572	0.00837371
ENSRNOG00000006787.6	Dhcr24	5:126164584-126164948	364	0.000120725	-4.967	0.00839737
ENSRNOG00000009766.7	Gpr180	15:103344285-103369639	3627	0.000122404	4.66744	0.00849701
ENSRNOG00000055579.1	Tmbim6	7:141061845-141070586	2659	0.000122733	4.66187	0.00850842
ENSRNOG00000001440.4	Mdh2	12:23941077-23942635	929	0.000123168	23.9556	0.00851004
ENSRNOG00000004424.6	RGD1563962	13:51317432-51331705	3004	0.000123168	-22.9967	0.00851004
ENSRNOG00000017340.5	Wdr12	9:66862882-66878210	572	0.000123168	23.0048	0.00851004
ENSRNOG00000025716.4	Lsm10	5:144106853-144108696	858	0.000123168	-22.3029	0.00851004
ENSRNOG00000031993.5	Prim1	7:2435504-2451593	2073	0.000123168	24.0213	0.00851004
ENSRNOG00000010735.6	Nfyc	5:139687438-139720205	5490	0.000124603	-20.7193	0.00859766
ENSRNOG00000010150.7	Strbp	3:21827169-21876223	1688	0.000125123	3.70316	0.00862779
ENSRNOG00000030644.4	Mt-nd1	MT:2848-14375	389	0.000126602	-3.14632	0.00871236
ENSRNOG00000038951.2	Cox17	11:64962661-64968469	458	0.000127605	-2.95908	0.00876385
ENSRNOG00000010389.6	Ndrg2	15:28305538-28313862	2269	0.00012792	7.4113	0.00877481
ENSRNOG00000007600.6	Igsf1	X:136802985-136807944	1813	0.000128335	7.37612	0.00879645
ENSRNOG00000009568.6	Hdac1	5:147736687-147743768	225	0.000128564	-4.6393	0.00880053
ENSRNOG00000016374.8	Fgfr2	1:200590866-200609251	2648	0.000128884	2.4769	0.00880495
ENSRNOG00000054172.1	Ctnnb1	8:129623112-129628572	2064	0.000129359	2.41079	0.00883153
ENSRNOG00000020379.7	Cog8	19:39246624-39252757	1561	0.000130693	-9.04033	0.00891082
ENSRNOG00000020340.7	Brd8	18:27397783-27409782	6709	0.000132219	3.00206	0.00900185
ENSRNOG00000010161.8	Myo10	2:78043531-78078321	9877	0.000135852	2.60033	0.00920187
ENSRNOG00000014117.7	Hmox1	19:14508504-14515459	2719	0.000136623	25.7141	0.00923594
ENSRNOG00000020179.7	Nt5c2	1:266667614-266732038	774	0.000136575	-22.4123	0.00923594
ENSRNOG00000003261.7	Usp9x	X:10526026-10545012	3348	0.000138998	2.58336	0.00937201
ENSRNOG00000024114.6	Zdbf2	9:70059682-70090847	11910	0.000139197	4.29698	0.00937929
ENSRNOG00000011891.6	Atp6v1b2	16:22337366-22350235	503	0.000140474	-8.09427	0.00945722
ENSRNOG00000022500.4	Rwdd4	16:47861245-47874944	828	0.000140537	23.7501	0.00945722
ENSRNOG00000010023.6	Slc33a1	2:154520090-154542974	2471	0.000141931	6.36873	0.00954483
ENSRNOG00000047768.2	Lamb2	8:117275198-117280517	3837	0.000142283	-7.29077	0.00956226
ENSRNOG00000004362.7	Rps6ka5	6:124557643-124567529	4045	0.000143929	23.4107	0.0096541
ENSRNOG00000047218.2	Clic5	9:19121670-19123284	1614	0.000144407	6.33525	0.00967985
ENSRNOG00000015514.7	Bcat1	4:179259304-179306215	2729	0.000145653	5.17996	0.00974079
ENSRNOG00000021062.5	Fxyd5	1:89464851-89467534	394	0.000146883	-59.8083	0.00979498
ENSRNOG00000025701.5	Nifk	13:34267452-34283678	7890	0.000147427	12.9725	0.00982496
ENSRNOG00000000665.7	Pitpnb	12:51313630-51341729	355	0.000147645	-2.15364	0.0098268
ENSRNOG00000002232.6	Aff1	14:7222877-7234722	5432	0.00014938	3.75814	0.00991035
ENSRNOG00000022218.6	Ifi44	2:256897764-256915569	1748	0.000155097	9.63021	0.0102502
ENSRNOG00000027151.5	Lrrc58	11:65747073-65760167	4688	0.000155357	9.13123	0.0102608
ENSRNOG00000019873.6	Eml3	1:225129036-225130304	436	0.000156913	11.0328	0.0103569
ENSRNOG00000000466.4	Hsd17b8	20:3817187-3819252	1210	0.000157414	2.38371	0.0103834
ENSRNOG00000053210.1	Zc3h11a	13:50234165-50238103	3616	0.000159615	-2.87423	0.0105152
ENSRNOG00000022392.3	Hspb8	12:45912588-45920014	1092	0.000160065	7.32438	0.0105381
ENSRNOG00000017481.6	Sucla2	15:55474867-55516954	1833	0.00016057	-12.3318	0.0105646
ENSRNOG00000002642.7	Ptges3	7:2479107-2490596	780	0.000161009	3.79297	0.0105867
ENSRNOG00000001189.6	Sik1	20:10664100-10670987	6756	0.000162973	8.80017	0.0107023
ENSRNOG00000055257.1	Selenof	2:250609119-250634099	1366	0.000163781	-2.2885	0.0107485
ENSRNOG00000017829.5	Ssu72	5:173149307-173155969	6662	0.000165089	6.19003	0.0108275
ENSRNOG00000046345.2	Rpn1	4:119997206-120018728	2327	0.000165631	2.71613	0.0108562
ENSRNOG00000005464.5	Lgalsl	14:105047910-105055524	3618	0.000166455	11.0034	0.0109032
ENSRNOG00000003049.7	Hsd17b10	X:21696749-21699243	955	0.000166669	-10.919	0.0109103
ENSRNOG00000042195.3	Pabpn1	15:33552716-33560249	5435	0.000167463	-3.45282	0.0109484
ENSRNOG00000029028.5	Mknk2	7:11908040-11919342	3671	0.000168186	-19.8358	0.0109888
ENSRNOG00000043388.3	Irf3	1:100992229-100998133	3267	0.000169909	-2.19991	0.0110663
ENSRNOG00000056297.1	Fmnl3	7:140982355-140984099	773	0.000174586	11.4812	0.0113424
ENSRNOG00000013503.5	Cdh24	15:33277846-33287567	3944	0.000176913	-11.695	0.0114863
ENSRNOG00000007801.7	R3hdm2	7:70677250-70805221	4001	0.000177443	2.66213	0.0115129
ENSRNOG00000056487.1	Oxr1	7:80713010-80745256	2241	0.000177545	3.5399	0.0115129
ENSRNOG00000007743.7	Mgst1	4:172119304-172135503	1872	0.000178842	2.8005	0.0115752
ENSRNOG00000001061.6	Rilpl2	12:37544879-37559980	4854	0.000180036	4.27564	0.0116379
ENSRNOG00000005275.6	Shmt1	10:47030818-47052353	2023	0.000181608	-2.3723	0.0117322
ENSRNOG00000052421.1	AABR07012475.2	2:196588419-196593744	4677	0.000182193	-7.5473	0.0117627
ENSRNOG00000002582.5	Hand1	10:43250041-43251047	1006	0.000182458	5.8797	0.0117724
ENSRNOG00000015434.7	Midn	7:12414254-12424245	5014	0.000185606	6.45427	0.0119606
ENSRNOG00000030790.5	Ctnnd1	3:72001889-72014569	3191	0.000185732	-2.11695	0.0119612
ENSRNOG00000016961.4	Rps27	2:189571825-189573288	700	0.000186098	3.16446	0.0119773
ENSRNOG00000012966.7	Acadl	9:73853758-73872570	1349	0.000186981	2.57414	0.0120177
ENSRNOG00000049994.3	Ifi44l	2:256948736-256979712	2284	0.000187073	6.17694	0.0120177
ENSRNOG00000002911.5	Alb	14:19176273-19191863	2072	0.000189452	-9.14857	0.0121604
ENSRNOG00000025481.4	Dctn2	7:70564696-70572358	2797	0.000189647	-16.3775	0.0121604
ENSRNOG00000051170.2	Ddx17	7:120759577-120780641	5561	0.000189596	3.6995	0.0121604
ENSRNOG00000005183.6	Rtf1	3:111478342-111523009	1055	0.000190491	-4.21279	0.0122069
ENSRNOG00000019574.6	Cuedc2	1:266078107-266086476	1103	0.000191025	-10.2812	0.0122335
ENSRNOG00000000417.7	Numa1	1:167090065-167090448	383	0.000193899	-3.12329	0.0123869
ENSRNOG00000020705.5	Rnls	1:252097950-252099778	803	0.000195361	-3.41228	0.0124726
ENSRNOG00000001469.8	Eln	12:24978441-25022101	3863	0.000196962	6.11075	0.0125671
ENSRNOG00000016751.5	Slc25a28	1:263419716-263424060	3244	0.00019753	-2.53998	0.0125877
ENSRNOG00000018107.5	Zfand5	1:238841835-238857211	10362	0.000198716	2.90549	0.0126477
ENSRNOG00000023455.5	Pomgnt1	5:135007310-135017242	2768	0.000199615	-3.59142	0.0126893
ENSRNOG00000020546.5	Lipe	1:82247909-82253645	2244	0.000201215	-2.792	0.0127831
ENSRNOG00000014066.6	Jade1	2:128462713-128514305	5829	0.00020148	12.1798	0.0127921
ENSRNOG00000001269.6	Ppp1cc	12:39864297-39882064	2607	0.000203042	-2.64754	0.0128563
ENSRNOG00000004159.5	Flii	10:46954398-46967421	4998	0.000203848	5.74124	0.0128949
ENSRNOG00000023972.6	Col4a2	16:83386387-83407181	4036	0.000208791	2.34322	0.0131673
ENSRNOG00000000411.6	Nus1	20:33556948-33584012	3749	0.000209449	-2.3399	0.0132008
ENSRNOG00000000073.6	Tmed5	14:2613078-2624785	2069	0.000209623	2.40644	0.0132037
ENSRNOG00000019622.3	Ackr3	9:97355920-97367455	2098	0.000211081	8.33379	0.0132875
ENSRNOG00000007600.6	Igsf1	X:136792634-136798311	2522	0.000211717	8.49901	0.0133031
ENSRNOG00000013712.7	Tex261	4:115445580-115453910	4445	0.000213931	20.9814	0.0134051
ENSRNOG00000022980.5	Sdhd	8:55028107-55037689	1322	0.000214118	-2.03683	0.0134051
ENSRNOG00000032660.7	Adgrl2	2:258792724-258805621	2695	0.000213779	2.49049	0.0134051
ENSRNOG00000006655.7	Plrg1	2:182040317-182056736	1845	0.000215114	8.84179	0.0134594
ENSRNOG00000055314.1	Msrb1	10:14105740-14110515	436	0.000217389	-2.23592	0.0135606
ENSRNOG00000014475.4	Slc31a1	5:78222462-78251557	3656	0.000217547	2.62285	0.0135623
ENSRNOG00000040287.4	Cyp1b1	6:2303610-2321702	15087	0.000219295	2.62604	0.0136548
ENSRNOG00000004132.7	Lasp1	10:85744273-85785235	3895	0.000220609	21.6412	0.0137284
ENSRNOG00000010816.2	Kcnk15	3:160237653-160301878	5272	0.000221851	2.4713	0.013789
ENSRNOG00000005292.7	Trip11	6:125741292-125768937	8326	0.000222052	6.48754	0.0137933
ENSRNOG00000019620.7	Pmf1	2:187751775-187771896	1173	0.000223774	-7.69975	0.0138919
ENSRNOG00000049758.2	Tbc1d16	10:108255949-108263495	3184	0.000224192	14.0212	0.0139094
ENSRNOG00000014350.4	Ccn1	2:251529091-251532372	2647	0.000225763	13.7963	0.0139818
ENSRNOG00000024186.4	Eef1b2	9:69953125-69956174	1345	0.000228854	3.5582	0.0141421
ENSRNOG00000031135.6	Smarcc2	7:2898461-2904453	2037	0.0002289	-29.5793	0.0141421
ENSRNOG00000005587.4	Suclg1	4:101202024-101210746	1310	0.000229347	-8.34827	0.0141613
ENSRNOG00000030111.4	Cyp11b3	7:116254193-116255227	664	0.000229925	-10.1073	0.0141885
ENSRNOG00000002232.6	Aff1	14:7222877-7236741	5752	0.000235238	4.08781	0.0145077
ENSRNOG00000033101.5	Myo18a	10:64996681-65007825	1830	0.000238714	-9.69507	0.0147133
ENSRNOG00000005301.6	Eif2b4	6:26546572-26552865	2362	0.000239367	-2.46079	0.0147447
ENSRNOG00000052421.1	AABR07012475.2	2:196588319-196593744	5425	0.000240166	-7.58894	0.0147852
ENSRNOG00000007475.6	Gpihbp1	7:116632489-116634301	844	0.000240912	-6.07439	0.0148223
ENSRNOG00000015911.7	Lrp5	1:218837922-218864158	2194	0.0002429	-20.6068	0.0149357
ENSRNOG00000019036.6	Ldhd	19:43833754-43841823	6079	0.000243081	3.85084	0.0149379
ENSRNOG00000053828.1	Ppp1r12c	1:72925175-72926109	765	0.000243297	-5.93805	0.0149423
ENSRNOG00000016273.5	Fam136a	4:118160104-118166124	1711	0.000243596	-5.15646	0.0149518
ENSRNOG00000001198.4	Fam222a	12:47748828-47794918	24487	0.000246021	13.6173	0.0150649
ENSRNOG00000011718.6	C1rl	4:157122126-157123679	1090	0.000246021	22.3347	0.0150649
ENSRNOG00000016357.8	Casc4	3:113818511-113887495	3952	0.000246021	12.6819	0.0150649
ENSRNOG00000009625.6	Dpysl2	15:43475573-43501577	3680	0.000246415	2.9254	0.0150789
ENSRNOG00000009360.6	Sh3bp1	7:120136098-120140473	351	0.000247263	8.00003	0.0151051
ENSRNOG00000003707.8	Zmym3	X:71298740-71307187	3091	0.000248476	-16.8045	0.0151345
ENSRNOG00000025936.5	Rpl6	12:40877171-40879259	2088	0.000248455	-2.82401	0.0151345
ENSRNOG00000057194.1	Tars2	2:197861070-197878496	2754	0.000248305	-3.38375	0.0151345
ENSRNOG00000027938.5	Jcad	17:55667647-55677980	6600	0.000249568	3.47013	0.0151921
ENSRNOG00000024578.7	Ttyh2	10:103216163-103248952	2600	0.000253481	-5.56911	0.0154121
ENSRNOG00000010673.7	Eral1	10:65272848-65291110	2099	0.000257152	11.9737	0.0156169
ENSRNOG00000047848.2	Cbr1	11:33813049-33813857	808	0.000259918	5.27544	0.015762
ENSRNOG00000008543.5	Pdlim2	15:51843563-51847440	930	0.0002611	2.37637	0.0158195
ENSRNOG00000048164.2	Acad8	8:28018131-28044962	2650	0.000263396	-4.43216	0.0159493
ENSRNOG00000005513.7	Srsf5	6:104611017-104615304	2295	0.000264444	-3.20215	0.015994
ENSRNOG00000061544.1	Spock2	20:29668774-29680071	3173	0.000264371	3.18678	0.015994
ENSRNOG00000051624.1	Hspe1	9:61690927-61694246	3319	0.000268043	2.34512	0.0161832
ENSRNOG00000017871.7	Sidt2	8:50230338-50239813	3289	0.000269222	-4.46058	0.016226
ENSRNOG00000005470.2	Atxn3	6:125817362-125853332	5327	0.000272273	4.03754	0.0163622
ENSRNOG00000018991.6	Gsn	3:14483923-14508922	2462	0.000274387	-6.41221	0.01647
ENSRNOG00000004585.7	Tmtc2	7:47585543-47588589	3046	0.000276239	12.0374	0.0165716
ENSRNOG00000000981.8	Scarb1	12:36697320-36762110	56858	0.000276488	3.30253	0.0165769
ENSRNOG00000001223.5	Pttg1ip	20:11746207-11763697	2467	0.000277453	5.20939	0.0166155
ENSRNOG00000021317.5	Cct2	7:60109909-60122805	2056	0.000277633	30.113	0.0166166
ENSRNOG00000000938.7	Ran	12:31319360-31323899	2689	0.000278659	3.49786	0.0166684
ENSRNOG00000025587.4	Plagl1	1:7219512-7252698	759	0.000281288	8.85391	0.0167868
ENSRNOG00000051671.1	Herc1	8:72158013-72198358	5540	0.000281288	7.54689	0.0167868
ENSRNOG00000028211.5	Akap17a	12:18528461-18531497	818	0.000284659	7.7423	0.0169586
ENSRNOG00000061639.2	AABR07044404.1	20:4774349-4792450	537	0.000285805	2.76906	0.0170171
ENSRNOG00000020354.2	Mrpl23	1:215701424-215709322	668	0.000286796	3.92504	0.0170565
ENSRNOG00000000529.5	Pim1	20:8164942-8170035	2143	0.000287693	-2.88154	0.0170999
ENSRNOG00000050453.2	AABR07002848.1	1:86872971-86887216	577	0.000293193	5.83119	0.0173869
ENSRNOG00000004217.6	Stk10	10:17510918-17521933	3049	0.000294303	2.81936	0.0174427
ENSRNOG00000014117.7	Hmox1	19:14508504-14515458	3188	0.000294869	14.7156	0.0174662
ENSRNOG00000022392.3	Hspb8	12:45905213-45920014	1931	0.00029616	3.26922	0.0175226
ENSRNOG00000020644.4	Nsg2	10:15867876-15869756	1880	0.000302163	-11.5263	0.0178039
ENSRNOG00000016891.7	Uimc1	17:10065883-10090296	749	0.000304719	-2.5395	0.0179366
ENSRNOG00000047656.2	Gaa	10:108411106-108413059	1102	0.00030573	-11.3761	0.0179859
ENSRNOG00000003924.6	Pi4k2b	14:60566469-60594903	3271	0.000308587	2.44775	0.0181231
ENSRNOG00000034198.4	Tceal9	X:106791333-106795052	1453	0.000308763	2.30594	0.0181231
ENSRNOG00000004544.7	Ube2e3	3:65816502-65872225	2205	0.000313818	-18.5271	0.018378
ENSRNOG00000005359.7	Csrnp3	3:52116229-52129263	10752	0.000313708	5.59662	0.018378
ENSRNOG00000020527.5	Drap1	1:220803795-220806040	1265	0.000314521	-5.94841	0.0184087
ENSRNOG00000061129.1	Psmd14	3:47639248-47673338	982	0.00031546	-7.78761	0.0184533
ENSRNOG00000008487.7	Amotl2	8:111210677-111226226	4288	0.000316296	7.65748	0.0184917
ENSRNOG00000006859.6	Insig1	4:344441-350804	2303	0.00031723	5.29792	0.0185227
ENSRNOG00000010170.5	Tubb4b	3:2441432-2442657	1225	0.000317364	-5.93912	0.0185227
ENSRNOG00000001072.5	Cers4	12:4436330-4474300	6725	0.000318219	6.80952	0.0185621
ENSRNOG00000003328.4	Cdip1	10:10988133-11035489	3700	0.000318678	-12.5466	0.0185784
ENSRNOG00000001030.8	Tsc22d1	15:58656492-58658467	1975	0.000321433	4.28741	0.0187179
ENSRNOG00000011222.5	Dynll1	12:47074212-47078182	2415	0.000323987	6.79739	0.018856
ENSRNOG00000019587.6	Ptprn	9:82446310-82461903	4036	0.00032418	6.95971	0.0188566
ENSRNOG00000001251.6	Grifin	12:16170457-16172182	612	0.000325223	-6.33088	0.018896
ENSRNOG00000007947.7	Fam13a	4:89183176-89281325	4380	0.000325473	-4.36939	0.0188999
ENSRNOG00000013090.7	Gadd45g	17:13391120-13393243	1538	0.000326215	3.85514	0.0189324
ENSRNOG00000024533.3	Eogt	4:129477731-129486709	3599	0.000328331	-6.73751	0.0190338
ENSRNOG00000008487.7	Amotl2	8:111223236-111226226	2340	0.000329927	5.61254	0.0191049
ENSRNOG00000004255.4	Usf1	13:89797723-89805558	1758	0.000330364	-2.05556	0.0191195
ENSRNOG00000017197.7	Pdgfb	7:121214616-121233753	3208	0.00033112	5.36052	0.0191311
ENSRNOG00000020361.7	Ip6k2	8:117589226-117599843	3568	0.000331032	23.5789	0.0191311
ENSRNOG00000002607.6	Sox9	10:101288477-101294029	4081	0.000335275	22.3213	0.0193388
ENSRNOG00000005600.7	Nr4a2	3:43111239-43114725	2057	0.000336022	3.96431	0.019371
ENSRNOG00000021732.5	Hsf1	7:117564633-117571060	3695	0.00033975	8.18162	0.0195641
ENSRNOG00000061474.1	Ctdp1	18:76960637-76970393	1817	0.000339638	-20.9337	0.0195641
ENSRNOG00000000503.7	Ppard	20:7818230-7846578	6152	0.000343706	8.81135	0.0197699
ENSRNOG00000004414.5	F11r	13:89826059-89853654	6779	0.000348958	-9.43697	0.0200496
ENSRNOG00000021106.7	Gramd1a	1:89563776-89585666	4185	0.000349712	-3.27097	0.0200818
ENSRNOG00000028266.4	Lrrc55	3:72593569-72604586	6163	0.000349921	2.53138	0.0200826
ENSRNOG00000027151.5	Lrrc58	11:65746566-65762376	15810	0.000351515	4.38161	0.0201518
ENSRNOG00000001719.6	Psmd2	11:83934086-83944776	2959	0.00035587	-5.83957	0.0203344
ENSRNOG00000016403.4	Olah	17:78903311-78903928	617	0.000357888	-28.8268	0.0204265
ENSRNOG00000047853.2	Ss18l2	8:130350492-130353140	618	0.000363077	-6.68756	0.0207112
ENSRNOG00000016989.3	Dolk	3:8849725-8870315	3074	0.000363864	-3.05374	0.0207447
ENSRNOG00000009950.6	Msantd2	8:39984632-39994276	4240	0.000366908	-3.88031	0.0208951
ENSRNOG00000060544.1	Kdm5b	13:51440767-51444064	708	0.000368601	-4.24242	0.02098
ENSRNOG00000023257.5	Adamts9	4:124785802-124858280	3394	0.000369726	7.63181	0.0210209
ENSRNOG00000004549.7	Dhx40	10:74080602-74082074	1472	0.000374354	-11.1619	0.0212723
ENSRNOG00000060544.1	Kdm5b	13:51445074-51456276	4238	0.000375855	-6.24223	0.0213459
ENSRNOG00000015514.7	Bcat1	4:179259307-179307129	2494	0.000376507	3.63678	0.0213712
ENSRNOG00000032042.4	RGD1560108	1:222671534-222679273	6591	0.000380286	6.34469	0.0215738
ENSRNOG00000014155.7	Spart	2:144522071-144549047	4123	0.000381581	-5.33604	0.0216354
ENSRNOG00000002934.7	Atp1b1	13:82737065-82743606	2039	0.000382823	-3.2226	0.0216939
ENSRNOG00000010331.5	Ctsb	15:46316737-46337697	2030	0.000383417	3.63614	0.0217157
ENSRNOG00000004923.6	Map4k5	6:92136240-92146328	1948	0.000386674	-8.66232	0.0218523
ENSRNOG00000046829.2	Kdr	14:34757756-34787183	3197	0.000388651	2.22862	0.0219418
ENSRNOG00000018246.6	Tdp2	17:42229641-42241101	4340	0.000391467	-5.64077	0.0220748
ENSRNOG00000013178.7	Cmip	19:49996685-50002898	2792	0.000392504	2.61456	0.0221213
ENSRNOG00000029399.4	Bcam	1:80674443-80682184	1592	0.000394398	-8.88668	0.0222159
ENSRNOG00000061379.1	C7	2:54707618-54734388	2954	0.000399955	4.83138	0.0224901
ENSRNOG00000019706.6	Phox2a	1:166898480-166899520	931	0.000409498	-2.07347	0.0229415
ENSRNOG00000021269.5	Chgb	3:125428259-125441604	7975	0.000410386	4.81935	0.0229787
ENSRNOG00000002254.6	Tmem33	14:42535701-42560174	5797	0.000410712	3.05363	0.0229845
ENSRNOG00000012873.8	Gfm1	2:164601573-164646510	2643	0.000411411	3.48455	0.0229958
ENSRNOG00000033496.5	Igdcc4	8:70623884-70627884	3557	0.000411762	-10.275	0.0229958
ENSRNOG00000047905.2	Dus1l	12:13210570-13212272	659	0.000412026	-5.74963	0.0229958
ENSRNOG00000024578.7	Ttyh2	10:103240376-103248952	1260	0.000417228	-4.51467	0.0232485
ENSRNOG00000038868.3	Iqcb1	11:66823982-66875253	2127	0.000417676	-21.1136	0.0232609
ENSRNOG00000019772.5	Dnpep	9:82510012-82513808	1272	0.000418771	-2.71146	0.0233094
ENSRNOG00000047768.2	Lamb2	8:117280034-117292068	5695	0.00042021	-6.7292	0.0233768
ENSRNOG00000012186.4	Golph3	2:62360577-62389207	3116	0.000427856	2.04424	0.0237766
ENSRNOG00000029441.5	Klhl2	16:26832640-26852308	2412	0.000431327	-9.71084	0.023928
ENSRNOG00000058601.1	AABR07036542.1	12:47841717-47848813	6780	0.000431507	5.5747	0.023928
ENSRNOG00000048682.2	Zwint	20:17075597-17091766	2284	0.000432129	2.29631	0.0239497
ENSRNOG00000014117.7	Hmox1	19:14508504-14515458	2505	0.000435332	10.5668	0.0240884
ENSRNOG00000049771.1	Gstt1	20:13813578-13816578	906	0.000435286	-9.19658	0.0240884
ENSRNOG00000005360.8	Dhrs7b	10:47065775-47111283	1501	0.000437423	-4.43543	0.0241912
ENSRNOG00000003239.6	Cant1	10:107432495-107445580	2696	0.000438372	-10.4259	0.0242282
ENSRNOG00000009946.7	Ldlr	8:22763776-22776924	5607	0.000439041	3.1973	0.0242418
ENSRNOG00000048961.1	Bhlhe41	4:180230743-180232591	1848	0.00043981	-3.75011	0.0242583
ENSRNOG00000000787.7	AABR07044364.1	20:3248147-3249189	736	0.000446707	-4.5759	0.0246256
ENSRNOG00000022686.6	Zdhhc2	16:54932287-55002544	3725	0.000449539	4.33626	0.0247473
ENSRNOG00000010549.4	Tspo	7:124468311-124470623	830	0.000450271	5.26792	0.0247692
ENSRNOG00000047250.2	Gmfb	15:23597474-23611592	5143	0.000452006	2.21333	0.0248515
ENSRNOG00000011573.6	Csad	7:143781513-143793870	2376	0.000457284	3.03387	0.0251008
ENSRNOG00000001524.7	Hat1	3:58066897-58070068	494	0.000459444	-26.4115	0.0251623
ENSRNOG00000018775.7	Cystm1	18:29171048-29234771	2197	0.000459607	3.92077	0.0251623
ENSRNOG00000015415.6	Rhoq	6:10532568-10534204	1089	0.000462312	9.31404	0.0252836
ENSRNOG00000017065.7	Arhgap28	9:116055576-116118654	5095	0.000467668	2.59747	0.0255422
ENSRNOG00000028155.6	Dnaaf2	6:91480789-91483201	2412	0.000467782	19.7755	0.0255422
ENSRNOG00000022686.6	Zdhhc2	16:54932545-54939271	2117	0.000475394	-4.26202	0.0259304
ENSRNOG00000053881.1	Baz2a	7:2547883-2548415	409	0.000477331	-7.16728	0.0260211
ENSRNOG00000019381.9	Eri3	4:77280731-77352075	16897	0.000479634	4.79613	0.0261203
ENSRNOG00000010945.6	Ywhab	3:160397271-160399940	2184	0.000479888	-4.51397	0.0261204
ENSRNOG00000054557.1	Lsm14b	3:175408388-175418569	1864	0.000483299	6.63585	0.026237
ENSRNOG00000049402.2	Nbl1	5:157524512-157535816	1947	0.000484527	2.37402	0.0262819
ENSRNOG00000057464.1	Fmr1	X:154684937-154722368	4270	0.000487711	3.49576	0.0264349
ENSRNOG00000001312.8	Pdgfa	12:17738062-17756197	1796	0.000491463	10.5031	0.0264578
ENSRNOG00000004084.7	Lratd1	6:39357528-39362324	4796	0.000491463	12.5269	0.0264578
ENSRNOG00000006329.5	Peli1	14:106007923-106053484	642	0.000491463	20.2103	0.0264578
ENSRNOG00000010100.6	Tyw5	9:64095678-64096145	467	0.000491463	-19.1612	0.0264578
ENSRNOG00000015231.6	Mrpl44	9:85542571-85548933	2461	0.000491463	19.9238	0.0264578
ENSRNOG00000021524.4	Mrap	11:30903396-30917388	4335	0.000491463	15.4967	0.0264578
ENSRNOG00000046472.2	Arfgap3	7:124149663-124162800	1787	0.000491463	-19.0841	0.0264578
ENSRNOG00000060262.1	Prps1	X:111798206-111820377	2118	0.000491463	13.112	0.0264578
ENSRNOG00000015160.5	Gem	5:25346801-25353669	6110	0.00049561	12.2358	0.0266534
ENSRNOG00000024964.7	Nufip2	10:65167954-65200604	11264	0.000497506	2.74222	0.0267275
ENSRNOG00000016105.4	Xrcc5	9:79733476-79748078	655	0.000498624	-12.4619	0.0267736
ENSRNOG00000016311.7	Slc6a2	19:15391569-15431978	5794	0.000502274	7.79684	0.0269556
ENSRNOG00000014362.6	Nudt14	6:137738123-137745145	849	0.000508572	-6.96572	0.0272512
ENSRNOG00000001114.5	Wipi2	12:13966917-13970044	3127	0.000509917	-19.7413	0.0272869
ENSRNOG00000003147.8	Sqstm1	10:35704082-35709340	5056	0.000510558	2.17491	0.0272869
ENSRNOG00000008688.7	Usp45	5:35916021-35917649	1628	0.000510379	6.53041	0.0272869
ENSRNOG00000008924.7	Arhgef12	8:47255461-47259667	4206	0.000509879	-2.7391	0.0272869
ENSRNOG00000004131.6	Pkn1	19:24803480-24831517	3147	0.000511282	22.5776	0.0272973
ENSRNOG00000014173.7	Smc3	1:274321185-274352858	3944	0.00051448	-3.4255	0.0274256
ENSRNOG00000030729.5	C4b	20:4302722-4304341	1069	0.000513967	2.3058	0.0274256
ENSRNOG00000006698.6	Rab33a	X:135359364-135360212	848	0.000517484	-4.88969	0.0275431
ENSRNOG00000019584.6	Dlk1	6:133581239-133583924	1163	0.00051792	2.07642	0.0275521
ENSRNOG00000014805.6	Wrap73	5:171455508-171455857	349	0.000519413	-3.49347	0.0275748
ENSRNOG00000009977.6	Thrap3	5:144178243-144188280	2475	0.000522979	-2.7025	0.0277214
ENSRNOG00000060568.1	Ptpn21	6:122655707-122663508	3686	0.000522824	-5.66277	0.0277214
ENSRNOG00000005413.5	Creb3l1	3:80892432-80933335	2694	0.00052491	17.2987	0.0277618
ENSRNOG00000013135.7	Ptpn12	4:10693048-10702390	1070	0.000525084	-12.6357	0.0277618
ENSRNOG00000051238.1	Mphosph8	15:36934306-36946708	1255	0.000525055	27.8338	0.0277618
ENSRNOG00000016281.5	Col4a1	16:83628894-83632153	1681	0.00052963	-27.5762	0.0279316
ENSRNOG00000051507.1	Azin2	5:147119849-147148566	2286	0.000529648	7.71259	0.0279316
ENSRNOG00000009700.5	Dync1i1	4:30807518-30892056	945	0.000534893	2.58686	0.0281652
ENSRNOG00000014192.6	Naa30	15:26049111-26052916	3805	0.00053711	-12.3098	0.0282675
ENSRNOG00000021729.6	Iqub	4:51480770-51496077	11428	0.000539481	20.2796	0.0283637
ENSRNOG00000031138.3	Irgm	10:34213889-34221954	2110	0.000539487	-10.6625	0.0283637
ENSRNOG00000017960.6	Deaf1	1:214283780-214310419	1232	0.000539936	-7.56353	0.0283728
ENSRNOG00000019834.6	Hsp90ab1	9:17817703-17823243	2718	0.000540577	4.07043	0.0283739
ENSRNOG00000025889.5	Gnas	3:172412339-172430957	14812	0.000540469	2.49668	0.0283739
ENSRNOG00000049985.2	Gprasp1	X:106308793-106313916	4854	0.00054078	2.25028	0.0283739
ENSRNOG00000011931.7	Smarca2	1:244754218-244783736	1875	0.000544766	-2.79097	0.0285686
ENSRNOG00000047853.2	Ss18l2	8:130350532-130356698	4303	0.000548519	3.19824	0.0287508
ENSRNOG00000013707.7	Spata13	15:41062511-41068350	5839	0.0005506	6.68748	0.0288306
ENSRNOG00000026643.5	Chordc1	8:17421236-17449096	9654	0.000556103	4.80662	0.0290452
ENSRNOG00000048088.2	Mest	4:58059011-58064963	2391	0.000559161	-13.0122	0.0291902
ENSRNOG00000001064.7	Sbno1	12:37622958-37637793	1443	0.000562135	-26.0351	0.0292863
ENSRNOG00000025338.7	Msi2	10:75673563-75742554	6115	0.000561906	2.7643	0.0292863
ENSRNOG00000008377.7	Wdtc1	5:151487573-151492833	2637	0.000563974	-15.5807	0.0293525
ENSRNOG00000012106.4	Dnaja4	8:59287765-59296219	3079	0.000566407	22.2501	0.0294643
ENSRNOG00000047247.3	Ptprs	9:10625877-10646836	5201	0.000568892	3.54357	0.0295787
ENSRNOG00000010775.7	Arrdc4	1:129766093-129780356	4218	0.000569986	4.54495	0.0296206
ENSRNOG00000020410.5	Th	1:216073025-216080362	1846	0.000573052	4.89467	0.029765
ENSRNOG00000004693.8	Pbx1	13:86386170-86451053	6824	0.0005752	2.03159	0.0298316
ENSRNOG00000007650.5	Cd63	7:3332168-3335589	1580	0.000574883	-5.12103	0.0298316
ENSRNOG00000008744.6	Cops2	3:118119941-118137125	1118	0.000575124	5.22208	0.0298316
ENSRNOG00000007271.5	Map3k9	6:105453172-105463809	8314	0.000584437	-9.61869	0.0302803
ENSRNOG00000010872.5	Ckb	6:136142947-136145861	1461	0.000588585	-2.18396	0.0304799
ENSRNOG00000019381.9	Eri3	5:136534846-136541825	1127	0.00059044	-8.0284	0.0305607
ENSRNOG00000038436.4	RGD1307100	2:123762002-123766829	1284	0.000592422	-17.8917	0.0306479
ENSRNOG00000023278.7	Sec61a2	17:76379938-76387004	2816	0.000595311	-18.9201	0.030774
ENSRNOG00000030124.5	Ptpn11	12:40942228-40956004	3923	0.000595456	4.01463	0.030774
ENSRNOG00000003228.5	Mid1ip1	X:13114257-13116261	2004	0.000607025	-4.11113	0.0312937
ENSRNOG00000001049.7	Tpt1	15:57890044-57895290	3807	0.000610096	3.28313	0.0314364
ENSRNOG00000018456.7	LOC100911664	17:42257018-42269279	5840	0.000611894	2.0652	0.0314976
ENSRNOG00000018225.7	Tp53inp2	3:150910833-150918743	4158	0.000613562	3.2612	0.0315677
ENSRNOG00000017352.4	Ctdnep1	10:56591027-56594656	826	0.00061522	2.2386	0.0316216
ENSRNOG00000039297.4	Mrpl52	15:33069617-33071478	1785	0.000614951	-3.58701	0.0316216
ENSRNOG00000008390.7	Dcun1d5	8:5437033-5437459	426	0.000616093	9.65135	0.0316507
ENSRNOG00000008106.4	Shmt2	7:70824605-70829815	2175	0.000620056	13.5048	0.0318385
ENSRNOG00000005371.8	Klhl29	6:29178354-29181290	1179	0.00062793	40.3349	0.0322108
ENSRNOG00000013035.5	Rab33b	2:140549520-140552280	2760	0.000631327	-15.3194	0.0323529
ENSRNOG00000015329.6	Kpna2	10:95210245-95212111	208	0.000637067	-2.69695	0.0325858
ENSRNOG00000018730.7	Nectin2	1:80631326-80632641	1315	0.000641087	24.647	0.0327719
ENSRNOG00000042903.1	Cox7a2l2	8:87212431-87214162	725	0.000646294	-7.75848	0.0330054
ENSRNOG00000013383.7	Tmub1	4:7257696-7260317	1338	0.000651514	-22.9115	0.0332227
ENSRNOG00000052357.1	Fosl2	6:25599012-25617913	1855	0.000657767	2.70191	0.0335092
ENSRNOG00000016779.7	Fam120a	17:16128970-16174327	1444	0.000658705	-3.74379	0.0335398
ENSRNOG00000052880.1	Prph	7:140742399-140746195	1772	0.0006591	4.71961	0.0335434
ENSRNOG00000011603.7	Cab39l	15:39838815-39849054	2105	0.000664694	-24.0498	0.0337781
ENSRNOG00000015437.7	Tmem14c	17:21576722-21577803	504	0.000665763	2.59147	0.0338159
ENSRNOG00000015294.7	Paxx	3:2678955-2679403	374	0.000669367	-22.1819	0.0339655
ENSRNOG00000003902.3	Fabp6	10:29191620-29196563	498	0.000674833	6.88612	0.0342093
ENSRNOG00000030019.4	Atp1a1	2:204003550-204032641	5597	0.000682097	-2.69566	0.0345423
ENSRNOG00000050445.2	Gde1	1:188394703-188407391	1754	0.000682404	5.50651	0.0345423
ENSRNOG00000001114.5	Wipi2	12:13966917-13973854	3620	0.000687831	6.51236	0.0347659
ENSRNOG00000003476.7	Slc6a4	10:63153176-63186557	3303	0.000697828	8.87459	0.035216
ENSRNOG00000015576.5	Hsdl1	19:52209385-52211566	2181	0.000699705	-15.4513	0.0352798
ENSRNOG00000010633.3	Acsl1	16:48966193-49004034	800	0.00070028	-2.62888	0.0352916
ENSRNOG00000031081.4	Stat2	7:2691307-2707767	4111	0.000706206	-4.20268	0.0355383
ENSRNOG00000045860.2	U2af1	20:10396620-10407561	958	0.000709025	2.18772	0.0356628
ENSRNOG00000030680.4	Ddx5	10:94979710-94986615	4688	0.000709752	-10.8496	0.035682
ENSRNOG00000050510.2	Rab1b	1:220480833-220491485	1863	0.000715191	-2.67758	0.0359379
ENSRNOG00000021317.5	Cct2	7:60109909-60113401	702	0.000717183	-10.9008	0.036003
ENSRNOG00000014187.6	Igf1r	1:129181219-129213817	8627	0.00071757	5.16818	0.036005
ENSRNOG00000005987.5	Suox	7:3098227-3102142	2209	0.000723158	-2.05267	0.0362677
ENSRNOG00000016016.7	Zmat2	18:29641071-29645140	2236	0.000727517	-19.2555	0.036451
ENSRNOG00000003809.7	Sat1	X:43626477-43629803	2635	0.000730483	3.9457	0.0365641
ENSRNOG00000003563.6	Blmh	10:63239642-63240447	504	0.00073145	-6.51646	0.0365948
ENSRNOG00000005149.6	Sacm1l	8:132643056-132663729	2944	0.000735752	4.40602	0.0367744
ENSRNOG00000003065.5	Glyr1	10:10725776-10746366	856	0.000736204	-4.76788	0.0367793
ENSRNOG00000001662.7	Dyrk1a	11:34879057-34959410	5661	0.000745807	12.1302	0.0371754
ENSRNOG00000029549.4	Eci3	17:30621047-30639081	1113	0.000745931	-4.21821	0.0371754
ENSRNOG00000045649.2	Arrdc3	2:8732913-8745884	4781	0.000747594	3.54795	0.0372403
ENSRNOG00000051592.1	AABR07044925.1	20:26830648-26846651	4870	0.000753791	5.671	0.0375128
ENSRNOG00000015380.6	Jup	10:88295873-88307467	415	0.00075542	-7.22699	0.0375758
ENSRNOG00000019804.5	B3gat3	1:225120061-225127226	2220	0.000757899	-8.17541	0.0376447
ENSRNOG00000046623.2	AABR07068455.1	9:105945578-105966530	1536	0.000757651	-2.40083	0.0376447
ENSRNOG00000025608.4	Lrat	2:181904563-181905475	912	0.000764681	3.64921	0.0379269
ENSRNOG00000020871.7	Ltbp4	1:84118045-84146036	5007	0.000765575	3.48436	0.037953
ENSRNOG00000001645.6	Filip1l	11:45056250-45079070	3801	0.000766764	2.76618	0.0379756
ENSRNOG00000004461.7	NEWGENE_6497122	10:13114643-13115373	730	0.000767256	2.03869	0.0379818
ENSRNOG00000002480.7	Gpr137b	17:90670231-90712175	15559	0.000772881	3.49065	0.0382236
ENSRNOG00000010083.5	Prpsap1	10:105430517-105452228	3108	0.000773929	-2.86069	0.0382571
ENSRNOG00000049203.3	Pex5	4:157007756-157009048	429	0.000777301	5.29516	0.0384054
ENSRNOG00000008709.6	Arhgap32	8:33296458-33392310	9294	0.000783292	6.0294	0.038646
ENSRNOG00000010524.6	Cryab	8:55178288-55182572	1275	0.000784544	3.52399	0.0386524
ENSRNOG00000014936.3	Ifitm2	1:213751094-213752401	1307	0.000784371	-6.19319	0.0386524
ENSRNOG00000019574.6	Cuedc2	1:266078106-266086440	1068	0.000787585	4.21828	0.0387838
ENSRNOG00000013484.5	Gsta1	9:27435815-27438441	946	0.00079443	3.15552	0.0391022
ENSRNOG00000014090.3	Retsat	4:100465169-100474331	2253	0.000796196	-8.47363	0.0391705
ENSRNOG00000019491.6	Stard10	1:166432870-166458418	2203	0.000797224	25.3214	0.0391917
ENSRNOG00000046000.2	Clasrp	1:80492404-80495282	846	0.000797385	-4.18344	0.0391917
ENSRNOG00000013469.7	Txndc5	17:26925796-26955291	5982	0.000801115	2.82492	0.0393501
ENSRNOG00000051952.1	Tes	4:44321715-44360415	2875	0.000801369	2.62119	0.0393501
ENSRNOG00000020813.6	Ltbp3	1:221106177-221116096	2848	0.000807532	2.98291	0.0396339
ENSRNOG00000018282.6	Gda	1:238978484-238982804	4320	0.000810181	-2.29825	0.039745
ENSRNOG00000004301.6	Dcaf13	7:78005192-78040230	1553	0.00081942	-7.01293	0.0401601
ENSRNOG00000000466.4	Hsd17b8	20:3817187-3819252	1300	0.000821624	2.14042	0.04023
ENSRNOG00000000571.6	Psap	20:29831282-29849726	889	0.000824354	-4.75625	0.0403064
ENSRNOG00000004973.7	Ppp2r5c	6:134844618-134884080	415	0.000824926	11.1127	0.0403153
ENSRNOG00000015696.6	Cdk5rap1	3:149835952-149870426	1967	0.000832834	-2.58434	0.0406633
ENSRNOG00000020869.6	mrpl9	2:195684209-195691581	4072	0.000833465	18.9687	0.0406749
ENSRNOG00000031216.3	AABR07055776.1	7:9968854-9978538	9684	0.000838652	2.44445	0.0408701
ENSRNOG00000020372.6	Hdac4	9:99057088-99178445	3695	0.000840892	6.50963	0.04096
ENSRNOG00000001214.5	Pfkl	20:11393841-11415219	2348	0.000847499	-19.7216	0.041243
ENSRNOG00000027030.1	Adm	1:175445087-175447260	1388	0.0008507	4.03077	0.0413793
ENSRNOG00000011705.7	Stmn2	2:95424247-95472115	2066	0.000852232	5.20635	0.0414225
ENSRNOG00000022218.6	Ifi44	2:256897764-256915569	1617	0.000852391	8.06622	0.0414225
ENSRNOG00000019684.5	Antkmt	10:15159802-15161938	1223	0.000853029	-5.30161	0.041434
ENSRNOG00000012207.8	Dst	9:37910961-37958064	5120	0.000856569	2.34411	0.0415864
ENSRNOG00000008471.7	Kif21b	13:53003569-53026750	6640	0.00086317	-4.44994	0.0418087
ENSRNOG00000009992.6	Rabggtb	2:260114389-260115647	313	0.000862927	-5.1691	0.0418087
ENSRNOG00000025806.4	Prr3	20:3307214-3309785	318	0.000864628	-22.0083	0.0418597
ENSRNOG00000018642.7	Leng8	1:73731237-73733858	434	0.000871329	-3.70152	0.042125
ENSRNOG00000003723.5	Wdr26	13:99493116-99526429	5975	0.000873378	3.66213	0.0422043
ENSRNOG00000018860.7	Mtg1	1:212606756-212620113	1985	0.000879965	-20.7695	0.0424829
ENSRNOG00000008459.4	Anapc13	8:111107348-111115774	625	0.000881057	-5.33083	0.0424959
ENSRNOG00000038960.1	RGD1309362	18:55498268-55506166	321	0.000884545	-20.5481	0.0426045
ENSRNOG00000032908.5	Acaa1a	8:128035735-128038352	2299	0.000888694	-2.20867	0.0427645
ENSRNOG00000011039.7	Gch1	15:23933271-23969035	2819	0.00089173	-3.06019	0.0428906
ENSRNOG00000003076.7	Rbms2	7:2548150-2571455	7375	0.000897045	-6.46095	0.0431261
ENSRNOG00000054724.1	Pycr3	7:116949874-116955171	1494	0.000900371	-21.6291	0.043266
ENSRNOG00000001843.5	Bcl6	11:80249118-80279088	19843	0.000903224	7.14314	0.0433829
ENSRNOG00000013747.6	Sh3bp2	14:81438215-81448265	1626	0.000903654	-9.47073	0.0433833
ENSRNOG00000051952.1	Tes	4:44320598-44322970	2063	0.000905642	3.24453	0.0434586
ENSRNOG00000017911.8	Tcaf1	4:72119339-72137052	5161	0.000916349	-2.91699	0.0438503
ENSRNOG00000030625.6	Tf	8:111694294-111701181	922	0.000915574	-7.20588	0.0438503
ENSRNOG00000016343.7	Dkk3	1:176940424-176983046	5272	0.000918474	5.35906	0.0439113
ENSRNOG00000037352.3	RGD1562747	8:69483264-69489891	3593	0.000924594	9.72338	0.044163
ENSRNOG00000013408.5	Npas2	9:46078265-46081883	1788	0.000925252	11.2034	0.0441699
ENSRNOG00000020225.5	Dlgap4	3:152810480-152847424	3794	0.000925592	2.59385	0.0441699
ENSRNOG00000011929.6	Abcd3	2:225335689-225360919	2970	0.000926721	-2.36213	0.0442034
ENSRNOG00000002319.9	Tsn	13:34238044-34251703	3778	0.000928462	-3.11728	0.0442455
ENSRNOG00000046005.1	Scd2	1:264059290-264072443	5139	0.000933837	-2.00702	0.0444607
ENSRNOG00000049575.2	Atn1	9:20263963-20270928	797	0.00094527	-8.9362	0.0449223
ENSRNOG00000022597.6	Cenpj	15:36745934-36750509	693	0.000949052	-6.90072	0.0450606
ENSRNOG00000020173.7	Tie1	5:137294543-137296240	647	0.000952154	-7.87285	0.0451664
ENSRNOG00000011747.5	Tmem205	8:22932175-22932948	773	0.000953104	-6.12007	0.0451792
ENSRNOG00000013741.7	Ube2d3	2:240626330-240627732	1402	0.0009533	2.86744	0.0451792
ENSRNOG00000018279.7	Sfxn1	17:11045760-11082134	3089	0.000955109	-3.3496	0.0452443
ENSRNOG00000011667.6	Fastk	4:7260540-7264590	2628	0.000962533	-3.16097	0.0455333
ENSRNOG00000000989.8	Bud31	12:11232867-11240631	1140	0.000966103	2.14774	0.0456604
ENSRNOG00000018358.4	Nt5dc2	16:7219587-7220619	734	0.000968277	-23.4931	0.0457213
ENSRNOG00000055236.1	Gemin4	10:64368808-64375893	3464	0.000967938	-6.60026	0.0457213
ENSRNOG00000014846.6	Anp32a	8:67295557-67298306	943	0.000970754	-7.8951	0.0458174
ENSRNOG00000000480.7	Phf1	20:5526970-5531942	2524	0.000981862	-12.1158	0.045905
ENSRNOG00000005346.7	Tmem128	14:77270770-77279831	2351	0.000981862	19.2071	0.045905
ENSRNOG00000005371.8	Klhl29	6:29178325-29181031	786	0.000981862	19.3707	0.045905
ENSRNOG00000006967.7	Xiap	X:128417169-128457195	6492	0.000984157	7.77998	0.045905
ENSRNOG00000008837.6	Ass1	3:10327228-10375826	1839	0.000981862	12.1061	0.045905
ENSRNOG00000009566.8	Phf12	10:64815464-64834944	3717	0.000981862	-14.6467	0.045905
ENSRNOG00000012012.5	Pinx1	15:47211568-47270343	1344	0.000981862	20.1545	0.045905
ENSRNOG00000013717.7	Bmp6	17:27112177-27113634	1457	0.000981862	18.9216	0.045905
ENSRNOG00000014453.6	Anxa5	2:123162409-123163797	721	0.000976253	-11.0815	0.045905
ENSRNOG00000016269.7	Rpl7l1	9:16512916-16517196	4280	0.000981862	16.8025	0.045905
ENSRNOG00000019634.9	Eif4e2	9:94310428-94325452	1640	0.000984157	10.4896	0.045905
ENSRNOG00000020113.6	Cnnm2	1:266667614-266732029	765	0.000981862	9.58467	0.045905
ENSRNOG00000020179.7	Nt5c2	1:266667614-266732038	833	0.000981862	-18.4978	0.045905
ENSRNOG00000028652.4	Map10	19:58500536-58511473	10937	0.000981862	15.8834	0.045905
ENSRNOG00000030232.4	Hacd3	8:70513042-70514269	1227	0.000984157	8.93576	0.045905
ENSRNOG00000030247.5	Eif4ebp3	18:29474380-29492718	3254	0.000984157	6.90201	0.045905
ENSRNOG00000032669.5	Serpina1	6:127628328-127632132	3804	0.000981862	10.8476	0.045905
ENSRNOG00000056041.1	AABR07062570.1	4:183266762-183294192	359	0.000981862	-17.872	0.045905
ENSRNOG00000021637.6	Ddx46	17:9471114-9484541	8399	0.000990625	3.58471	0.0460819
ENSRNOG00000055525.1	Kmt2b	1:89022888-89024200	1021	0.000994066	-9.05661	0.0462212
ENSRNOG00000050578.2	Rheb	4:6862484-6873499	789	0.000998122	-18.2857	0.046368

## Sheet: CT vs. H120
The novel differentially expressed transcripts (P < 0.001, FDR < 0.05 and |FC| > 2) length associated with annotated genes identified in adrenal glands in CT vs. H120.
Gene ID	Gene name	Position	Transcript length (bp*)	P-value	FC	FDR
ENSRNOG00000000036.6	Klhdc8a	13:49073916-49082729	3926	1.32116e-09	-4.10412	3.40812e-07
ENSRNOG00000000036.6	Klhdc8a	13:49076941-49082729	3867	5.1353e-19	-5.02594	5.02135e-16
ENSRNOG00000000161.7	Chm	X:84665548-84667728	2180	8.70545e-05	-6.97274	0.00634793
ENSRNOG00000000275.8	Fam13c	20:19359984-19400033	2607	4.21682e-06	7.78255	0.000463816
ENSRNOG00000000428.6	Cyp21a1	20:4486218-4489328	2071	4.94888e-26	4.16198	9.77118e-23
ENSRNOG00000000428.6	Cyp21a1	20:4485916-4486635	408	0.000762824	2.34456	0.0378719
ENSRNOG00000000428.6	Cyp21a1	20:4486218-4489286	2032	3.82315e-08	47.8729	7.17592e-06
ENSRNOG00000000477.5	Daxx	20:5480102-5485861	2464	0.000439332	-16.8335	0.0244081
ENSRNOG00000000481.8	Cuta	20:5531939-5533438	937	0.000245421	11.657	0.0150973
ENSRNOG00000000506.7	Tead3	20:7905829-7909511	3387	1.08763e-14	9.19566	5.84643e-12
ENSRNOG00000000511.8	Srpk1	20:5829417-5837217	5080	7.24012e-05	5.24449	0.005414
ENSRNOG00000000517.5	Kctd20	20:6219542-6222804	3262	0.000548728	2.11397	0.0289953
ENSRNOG00000000521.4	Cdkn1a	20:6351457-6358864	1933	6.90142e-10	6.12818	1.85976e-07
ENSRNOG00000000633.6	Rhobtb1	20:20712776-20730654	958	0.000553411	-4.21536	0.0291854
ENSRNOG00000000648.6	Jmjd1c	20:22751742-22793155	7691	0.00023661	2.75257	0.0147051
ENSRNOG00000000648.6	Jmjd1c	20:22751742-22771138	2626	1.22207e-07	2.98066	1.99793e-05
ENSRNOG00000000661.5	Hps4	12:50295102-50315820	1280	7.00742e-08	6.29191	1.22356e-05
ENSRNOG00000000661.5	Hps4	12:50285238-50294686	2469	3.97453e-10	8.98657	1.13038e-07
ENSRNOG00000000661.5	Hps4	12:50285238-50297502	1809	3.22696e-12	9.39851	1.2792e-09
ENSRNOG00000000661.5	Hps4	12:50312332-50315846	882	1.11679e-08	11.9557	2.34002e-06
ENSRNOG00000000664.4	Tpst2	12:50343075-50383542	1800	3.34533e-06	-3.08728	0.000378797
ENSRNOG00000000700.4	Tmem119	12:48597444-48609302	11858	0.000456766	7.05503	0.0251859
ENSRNOG00000000700.4	Tmem119	12:48598380-48605704	2433	1.14142e-07	3.33593	1.87804e-05
ENSRNOG00000000796.8	Ranbp2	20:28055939-28077352	8264	6.62065e-05	2.71834	0.00502768
ENSRNOG00000000796.8	Ranbp2	20:28064287-28077352	3349	2.45381e-05	3.57894	0.0021681
ENSRNOG00000000796.8	Ranbp2	20:28069763-28077352	2844	0.00018886	-14.5378	0.0121113
ENSRNOG00000000796.8	Ranbp2	20:28050478-28077352	8427	0.000346435	6.61233	0.0200725
ENSRNOG00000000827.6	Ier3	20:3438794-3440010	1216	1.79596e-05	3.58457	0.00163758
ENSRNOG00000000902.7	Hsph1	12:6322203-6335463	3090	2.55716e-15	14.0599	1.51759e-12
ENSRNOG00000000906.7	Medag	12:6711099-6730197	2219	0.000519781	-16.2566	0.0278121
ENSRNOG00000000909.8	Uspl1	12:6929843-6941198	2148	0.000201886	3.24151	0.0128265
ENSRNOG00000000909.8	Uspl1	12:6930015-6956984	3494	1.98766e-06	3.27729	0.000239804
ENSRNOG00000000918.7	Zbed5	12:30311940-30313256	1316	1.07256e-06	2.18859	0.000140101
ENSRNOG00000000926.7	Mrps17	12:30570566-30573660	850	0.000175784	-2.12087	0.0114111
ENSRNOG00000000931.8	Sfswap	12:30740514-30757127	1366	0.000124519	8.76092	0.00850587
ENSRNOG00000000938.7	Ran	12:31319462-31323827	2515	1.79424e-10	5.42948	5.41807e-08
ENSRNOG00000000967.5	Aacs	12:36512385-36555740	3244	0.000129081	-6.0115	0.00878249
ENSRNOG00000000981.8	Scarb1	12:36694650-36740869	1919	0.000146281	3.57074	0.00980329
ENSRNOG00000000981.8	Scarb1	12:36741876-36762040	15540	2.57568e-09	5.96634	6.20764e-07
ENSRNOG00000000988.4	Xab2	12:2158388-2158725	254	0.000112247	-26.5338	0.00788268
ENSRNOG00000000989.8	Bud31	12:11232898-11240603	1240	1.34128e-07	3.52755	2.16222e-05
ENSRNOG00000001052.7	Slc25a30	15:57811293-57820816	5118	0.000265924	3.29967	0.0161301
ENSRNOG00000001053.5	Tmed2	12:37471254-37474987	1581	7.76267e-05	-12.3959	0.00573789
ENSRNOG00000001114.5	Wipi2	12:13966917-13970044	3127	4.42357e-05	-7.2217	0.00355652
ENSRNOG00000001189.6	Sik1	20:10667161-10670961	3669	4.23299e-07	5.24341	6.16719e-05
ENSRNOG00000001189.6	Sik1	20:10670724-10680350	3766	1.04473e-06	27.5567	0.00013734
ENSRNOG00000001198.4	Fam222a	12:47741676-47794752	33426	9.21679e-12	21.9082	3.42858e-09
ENSRNOG00000001198.4	Fam222a	12:47741676-47794178	8939	1.21606e-11	3.6953	4.35026e-09
ENSRNOG00000001222.7	Ube2g2	20:11700084-11721838	1922	3.40789e-05	3.42427	0.0028609
ENSRNOG00000001239.6	Ddt	20:13824501-13832045	5682	6.05414e-05	-3.57172	0.00468762
ENSRNOG00000001242.6	Gstt3	20:13816589-13823854	5593	1.25445e-05	-3.47181	0.00119365
ENSRNOG00000001249.8	Col6a1	20:12672066-12676370	2068	0.000350666	2.43979	0.0202833
ENSRNOG00000001277.4	Mafk	12:16923981-16934883	2830	0.000155772	3.28061	0.0103315
ENSRNOG00000001344.7	Aldh2	12:40497049-40498813	530	0.000729545	76.6828	0.0365021
ENSRNOG00000001465.7	Ids	8:69447360-69453546	3087	0.000472306	2.37861	0.025877
ENSRNOG00000001478.7	Gtf2ird1	12:25369566-25370948	1382	3.58719e-06	3.18086	0.00040295
ENSRNOG00000001516.7	Rapgef4	3:58802585-58925173	3732	0.000495182	2.04659	0.0267581
ENSRNOG00000001602.8	Ltn1	11:27022413-27041197	3370	0.000501942	-17.1976	0.0270303
ENSRNOG00000001719.6	Psmd2	11:83934086-83944237	2827	0.000174429	10.02	0.011342
ENSRNOG00000001729.5	Xxylt1	11:73328477-73330891	2414	1.649e-05	2.20771	0.00152525
ENSRNOG00000001729.5	Xxylt1	11:73219108-73270632	410	2.74555e-05	6.10153	0.00238886
ENSRNOG00000001762.3	Pcyt1a	11:71551177-71556128	1946	5.8997e-09	24.9171	1.29428e-06
ENSRNOG00000001773.7	Senp2	11:82627972-82632586	2643	3.38468e-06	2.47924	0.000382294
ENSRNOG00000001773.7	Senp2	11:82658439-82664683	510	0.00056937	3.12136	0.0298099
ENSRNOG00000001806.7	Fetub	11:81648845-81657439	1435	0.000168628	7.89114	0.0110204
ENSRNOG00000001843.5	Bcl6	11:80255789-80279082	3396	6.22789e-05	6.64119	0.00478606
ENSRNOG00000001843.5	Bcl6	11:80255945-80279082	13010	3.85056e-07	25.18	5.67199e-05
ENSRNOG00000001843.5	Bcl6	11:80264971-80279081	3983	1.20688e-08	26.9621	2.51338e-06
ENSRNOG00000001851.7	Far2	4:182528966-182565436	3779	4.8438e-06	3.4929	0.000524039
ENSRNOG00000001877.6	Med15	11:87553849-87628636	3750	0.000989186	3.09713	0.0458218
ENSRNOG00000001930.7	Ccdc50	11:76741721-76748199	6478	0.00035313	-7.20345	0.0204029
ENSRNOG00000001964.7	Cd47	11:53511488-53563700	5013	3.2252e-05	-4.17831	0.00273889
ENSRNOG00000020179.7	Nt5c2	1:266667614-266732038	833	0.000245421	-21.0612	0.0150973
ENSRNOG00000002040.8	Bmp2k	14:14125845-14159551	6026	1.00526e-05	4.8758	0.000984824
ENSRNOG00000002050.4	Igfbp7	14:33063467-33070193	614	9.42618e-08	-3.15208	1.59175e-05
ENSRNOG00000002050.4	Igfbp7	14:33010136-33010790	654	0.000148718	2.37619	0.00992774
ENSRNOG00000002093.4	Tgfbr3	14:3633651-3682549	5253	9.52054e-05	-3.68365	0.00685946
ENSRNOG00000002178.5	Mrps18c	14:10442148-10446941	367	1.4616e-08	-10.502	2.97154e-06
ENSRNOG00000002232.6	Aff1	14:7222876-7236741	5753	0.000395078	5.35846	0.0223732
ENSRNOG00000002232.6	Aff1	14:7222876-7234722	5433	4.00757e-07	5.75106	5.88638e-05
ENSRNOG00000002232.6	Aff1	14:7222876-7260616	11153	4.69544e-06	23.8695	0.000510679
ENSRNOG00000002232.6	Aff1	14:7222877-7244035	6932	7.91814e-08	10.8624	1.35933e-05
ENSRNOG00000002232.6	Aff1	14:7222877-7326763	9079	3.45954e-06	7.44256	0.000389892
ENSRNOG00000002232.6	Aff1	14:7222877-7234722	5432	0.000138133	3.96491	0.00929969
ENSRNOG00000002254.6	Tmem33	14:42535700-42559439	5220	3.90652e-08	4.68916	7.31902e-06
ENSRNOG00000002254.6	Tmem33	14:42541883-42560174	1412	5.63836e-08	22.7182	1.01382e-05
ENSRNOG00000002353.8	Rab3gap2	13:103207984-103228434	2134	0.000161892	3.48192	0.0106207
ENSRNOG00000002373.8	Akap1	10:76151017-76184115	3805	0.000127701	-3.78018	0.00870014
ENSRNOG00000002387.5	Tceal1	X:107370344-107372338	1259	0.000247089	-21.0015	0.0151908
ENSRNOG00000002393.7	Eprs	13:103354681-103371715	1497	2.52454e-08	4.31666	4.94647e-06
ENSRNOG00000002408.6	Rbm47	14:43756720-43843285	12293	0.000712476	15.1419	0.0358257
ENSRNOG00000002408.6	Rbm47	14:43760889-43839850	4689	6.11925e-10	3.58418	1.67537e-07
ENSRNOG00000002413.6	Gpc4	X:139464158-139465022	864	5.47186e-05	2.50715	0.00428852
ENSRNOG00000002452.6	Txndc11	10:4578433-4635953	3108	0.000964067	-6.71928	0.0453209
ENSRNOG00000002461.7	Nid1	17:90552888-90560963	5063	1.29365e-13	7.44972	6.26505e-11
ENSRNOG00000002461.7	Nid1	17:90552888-90578738	12096	1.85507e-05	5.44504	0.00168698
ENSRNOG00000002480.7	Gpr137b	17:90695642-90712175	10266	6.27731e-05	-5.80813	0.00480964
ENSRNOG00000002480.7	Gpr137b	17:90670144-90712179	13741	5.70795e-11	27.5004	1.87232e-08
ENSRNOG00000002480.7	Gpr137b	17:90670144-90712179	12398	1.00091e-07	8.93833	1.67914e-05
ENSRNOG00000002480.7	Gpr137b	17:90670144-90712179	15650	0.000105898	4.69822	0.00749312
ENSRNOG00000002618.7	Ivns1abp	13:68721153-68722538	1385	0.000391623	-9.0557	0.0221898
ENSRNOG00000002642.7	Ptges3	7:2479107-2490596	780	3.48728e-12	6.03038	1.36137e-09
ENSRNOG00000002721.7	Ndufb4	11:65960082-65966899	502	0.00032569	-4.65805	0.0189992
ENSRNOG00000002746.7	Fstl1	11:65781228-65782742	971	1.7251e-06	17.0073	0.000212499
ENSRNOG00000002749.7	Spag9	10:81736164-81799596	2398	0.000892044	7.73069	0.0427174
ENSRNOG00000002749.7	Spag9	10:81798814-81828136	7561	2.34745e-05	3.41208	0.00208138
ENSRNOG00000002755.6	Pafah1b1	10:61455741-61468153	5025	0.000134447	-6.58571	0.00909332
ENSRNOG00000002841.7	Cdc42bpa	13:98431024-98447762	1428	0.000876521	4.61477	0.0422275
ENSRNOG00000002898.7	Nme7	13:82673914-82738576	1855	0.000279575	-5.98919	0.0167958
ENSRNOG00000002911.5	Alb	14:19176271-19191863	2074	1.28535e-08	8.41513	2.64994e-06
ENSRNOG00000002911.5	Alb	14:19176273-19191863	2072	3.81017e-05	3.99583	0.00313203
ENSRNOG00000002934.7	Atp1b1	13:82737065-82743606	2039	8.04079e-07	-4.20298	0.000109199
ENSRNOG00000003076.7	Rbms2	7:2550691-2554969	738	0.000936492	17.3825	0.0443699
ENSRNOG00000003127.4	Spryd4	7:2621960-2623809	1506	1.94698e-06	-6.50994	0.000236005
ENSRNOG00000003147.8	Sqstm1	10:35704082-35709340	5056	2.98182e-12	5.67084	1.19122e-09
ENSRNOG00000003147.8	Sqstm1	10:35704082-35709340	3512	1.19807e-07	2.9622	1.9681e-05
ENSRNOG00000003147.8	Sqstm1	10:35712638-35716309	1370	1.68713e-08	4.6359	3.39658e-06
ENSRNOG00000003177.7	Mat2b	10:25832071-25838290	1534	1.69444e-05	-42.7908	0.00155746
ENSRNOG00000003228.5	Mid1ip1	X:13114257-13116261	2004	4.74368e-05	-4.83165	0.00376961
ENSRNOG00000003228.5	Mid1ip1	X:13114568-13116777	1929	3.89962e-09	-5.3331	8.97699e-07
ENSRNOG00000003229.8	Tspan7	X:13261482-13275445	1451	0.000136992	-26.0625	0.00924719
ENSRNOG00000003239.6	Cant1	10:107432498-107445654	2809	0.000605288	-4.62851	0.0312915
ENSRNOG00000003328.4	Cdip1	10:10988133-11035492	3703	2.98946e-06	-30.8986	0.000346811
ENSRNOG00000003334.5	Klhl21	5:169184712-169190074	2934	0.000929887	3.35879	0.0440977
ENSRNOG00000003338.6	Pmp22	10:49567281-49568584	1303	0.000989451	-11.4785	0.0458218
ENSRNOG00000003359.7	Ogt	X:71573205-71585908	3307	3.16778e-06	-6.12345	0.000362178
ENSRNOG00000003399.8	Hnrnph1	10:35870231-35880396	4139	6.23816e-10	12.393	1.70338e-07
ENSRNOG00000003464.6	Hid1	10:103899118-103900379	1261	0.000105347	5.736	0.00745932
ENSRNOG00000003515.6	Ephx1	13:99271365-99273884	701	0.000610841	-9.41666	0.0315468
ENSRNOG00000003526.8	Sytl4	X:104763895-104771009	4264	3.48649e-05	-3.42964	0.00291497
ENSRNOG00000003551.5	B4galt3	13:89643864-89649906	2026	4.36064e-08	6.04212	8.08135e-06
ENSRNOG00000003661.6	Jpt1	10:104057696-104075951	1558	0.000245421	-20.9641	0.0150973
ENSRNOG00000003686.7	Tbl1x	X:44971870-44988551	4665	5.14613e-05	-5.9461	0.00406113
ENSRNOG00000003687.6	Rgs2	13:60845355-60849094	1820	8.18365e-19	8.10692	7.85248e-16
ENSRNOG00000003687.6	Rgs2	13:60845355-60849094	2064	1.17579e-11	12.2292	4.24205e-09
ENSRNOG00000003691.5	Tmed7	18:40577299-40584248	4969	4.64371e-06	-26.3413	0.000506125
ENSRNOG00000003723.5	Wdr26	13:99493116-99533998	6395	8.26986e-06	4.00592	0.000835386
ENSRNOG00000003743.7	Dars	13:45078703-45081563	2860	2.14703e-21	2.49554	2.62423e-18
ENSRNOG00000003759.6	Galc	6:122176480-122183800	2738	9.9125e-06	-5.07481	0.000974722
ENSRNOG00000003809.7	Sat1	X:43626479-43629778	2608	1.00186e-06	2.15345	0.000133067
ENSRNOG00000003897.6	Col1a1	10:82745799-82762789	5826	0.000161885	3.08504	0.0106207
ENSRNOG00000003927.7	Cd55	13:47126715-47154292	4291	0.000132735	11.2008	0.00899533
ENSRNOG00000003927.7	Cd55	13:47126727-47127913	1186	2.94725e-05	9.45396	0.00254281
ENSRNOG00000003975.6	Pfn1	10:57272998-57278346	3460	0.00042313	2.49093	0.0236305
ENSRNOG00000003977.5	Dusp1	10:16970106-16973425	3059	3.69705e-07	7.59818	5.4694e-05
ENSRNOG00000003977.5	Dusp1	10:16970577-16973424	2250	3.21808e-09	6.84215	7.56066e-07
ENSRNOG00000003977.5	Dusp1	10:16970577-16973424	2363	6.58798e-05	4.24331	0.00501028
ENSRNOG00000004019.3	Phlda1	7:54246985-54250098	3113	3.897e-16	10.2058	2.5245e-13
ENSRNOG00000004049.7	Baiap2	10:109178171-109187463	884	2.30455e-07	4.12344	3.54735e-05
ENSRNOG00000004091.6	Cwc25	10:85684230-85709607	6079	4.55287e-08	15.3003	8.37712e-06
ENSRNOG00000004091.6	Cwc25	10:85686575-85709607	10971	2.07319e-07	19.2734	3.22996e-05
ENSRNOG00000004091.6	Cwc25	10:85684230-85709606	6078	1.37646e-05	9.73631	0.0013025
ENSRNOG00000004132.7	Lasp1	10:85779843-85785133	2843	1.08971e-08	4.77889	2.29733e-06
ENSRNOG00000004172.6	Pdk2	10:82838265-82840718	1363	5.35031e-06	-2.84135	0.000571609
ENSRNOG00000004172.6	Pdk2	10:82841486-82852800	843	0.000919816	-2.37214	0.0437819
ENSRNOG00000004217.6	Stk10	10:17510918-17521933	3049	3.47435e-10	4.83564	9.99191e-08
ENSRNOG00000004255.4	Usf1	13:89797723-89805558	1758	0.000169499	-2.5234	0.0110632
ENSRNOG00000004255.4	Usf1	13:89797723-89805558	1727	6.26795e-05	-3.44285	0.00480631
ENSRNOG00000004284.4	Btg1	7:37811605-37815088	2687	1.57081e-14	4.95351	8.22831e-12
ENSRNOG00000004328.8	Deptor	7:94895696-95000751	6248	6.91249e-05	-2.4995	0.00521842
ENSRNOG00000004364.4	Babam2	6:26011651-26051993	1056	6.32905e-06	7.70627	0.000656368
ENSRNOG00000004424.6	RGD1563962	13:51317432-51331705	3004	0.000122818	-22.2633	0.0084233
ENSRNOG00000004466.4	Fam210b	3:170354782-170364575	3630	0.000298939	-2.45059	0.0177411
ENSRNOG00000004466.4	Fam210b	3:170354048-170364448	3620	1.72616e-06	-2.41143	0.000212499
ENSRNOG00000004500.5	Myc	7:102586312-102591229	3330	2.50568e-07	5.65595	3.82824e-05
ENSRNOG00000004510.4	Slc35b1	10:83201288-83208614	1539	0.000390728	4.342	0.0221636
ENSRNOG00000004517.8	Igf1	7:28412166-28417731	531	6.19377e-06	-10.7427	0.000646255
ENSRNOG00000004517.8	Igf1	7:28468615-28491828	6629	2.32125e-05	-4.01153	0.00206519
ENSRNOG00000004535.6	Kcng3	6:6780294-6846576	19884	0.000637632	4.23737	0.0326024
ENSRNOG00000004681.5	Eny2	7:83347989-83358430	5005	0.00065934	6.97846	0.0334955
ENSRNOG00000004726.7	Mapkapk2	13:47830921-47831118	197	4.16068e-05	3.92496	0.00337423
ENSRNOG00000004737.7	Cd48	13:90116762-90140372	1503	2.69864e-06	-2.05013	0.000315928
ENSRNOG00000004791.5	Arf6	6:91696274-91699874	3600	6.76337e-08	9.05236	1.18547e-05
ENSRNOG00000004793.6	Ncln	7:11084357-11091692	2861	7.57609e-05	2.40518	0.00562427
ENSRNOG00000004814.6	Elob	10:13162951-13166238	360	0.000980172	19.9385	0.045526
ENSRNOG00000004814.6	Elob	10:13162965-13166238	346	9.98708e-06	-4.67377	0.000979344
ENSRNOG00000004908.5	Smc6	6:36968149-36995916	3423	0.000319444	-4.44597	0.0187093
ENSRNOG00000005116.5	LOC108353446	3:148283208-148284141	933	9.68599e-23	3.89239	1.44125e-19
ENSRNOG00000005144.5	Tmem18	6:49529676-49536674	2950	0.000127187	-11.5659	0.00867083
ENSRNOG00000005183.6	Rtf1	3:111478342-111523009	1055	3.83834e-05	-4.96217	0.00315014
ENSRNOG00000005248.6	Slc1a4	14:104581186-104593134	3056	3.28722e-06	7.94829	0.000373753
ENSRNOG00000005257.7	Prkaca	19:25102687-25118869	2133	0.000299853	-10.2744	0.017785
ENSRNOG00000005292.7	Trip11	6:125741163-125751025	6648	7.31013e-08	13.5874	1.26565e-05
ENSRNOG00000005292.7	Trip11	6:125741163-125748483	4722	5.72437e-07	3.70357	8.06202e-05
ENSRNOG00000005292.7	Trip11	6:125741292-125768937	8326	1.2406e-05	8.81281	0.00118156
ENSRNOG00000005292.7	Trip11	6:125774938-125776819	589	6.01651e-08	12.0893	1.06944e-05
ENSRNOG00000005323.8	AABR07064873.1	6:99137776-99146550	1047	3.59208e-05	6.81376	0.0029814
ENSRNOG00000005331.4	Vapb	3:171864514-171874639	6607	1.11539e-06	-35.524	0.000145326
ENSRNOG00000005333.6	Azin1	7:77345645-77358170	3667	0.000773149	-16.18	0.038292
ENSRNOG00000005346.7	Tmem128	14:77270792-77279831	1111	4.5633e-05	-25.5411	0.0036517
ENSRNOG00000005371.8	Klhl29	6:29178307-29181185	1264	3.39328e-12	24.4621	1.32973e-09
ENSRNOG00000005371.8	Klhl29	6:29178325-29181031	758	2.41973e-07	6.48639	3.70342e-05
ENSRNOG00000005406.7	Clint1	10:30953455-30983612	332	0.000272495	-21.1525	0.0164592
ENSRNOG00000005413.5	Creb3l1	3:80892432-80933335	2858	1.50466e-16	9.34415	1.05091e-13
ENSRNOG00000005413.5	Creb3l1	3:80892432-80933335	2694	6.47798e-08	9.7045	1.14277e-05
ENSRNOG00000005413.5	Creb3l1	3:80892432-80905646	2046	9.4379e-12	14.7561	3.49816e-09
ENSRNOG00000005413.5	Creb3l1	3:80892432-80901803	1859	3.34634e-06	7.68894	0.000378797
ENSRNOG00000005413.5	Creb3l1	3:80892432-80894724	2128	3.05454e-19	22.0728	3.07461e-16
ENSRNOG00000005470.2	Atxn3	6:125844898-125853329	323	0.000708218	8.77229	0.0356785
ENSRNOG00000005478.5	Fkbp9	4:87222887-87234208	1916	0.000346678	-4.95975	0.0200753
ENSRNOG00000005482.5	Sap30bp	10:104482971-104510460	636	1.14874e-11	-71.04	4.18232e-09
ENSRNOG00000005513.7	Srsf5	6:104610961-104615319	2362	5.33606e-10	-4.505	1.4847e-07
ENSRNOG00000005513.7	Srsf5	6:104611017-104615304	2298	9.46089e-06	-2.05575	0.000939874
ENSRNOG00000005538.7	Psmd11	10:67811227-67857562	3074	5.6688e-10	3.0609	1.56878e-07
ENSRNOG00000056098.1	Tfpt	1:64172152-64175101	874	9.577e-08	2.01871	1.60928e-05
ENSRNOG00000056098.1	Tfpt	1:64172401-64173177	459	7.75513e-09	-8.41747	1.67979e-06
ENSRNOG00000005615.6	Gadd45a	4:97782510-97784845	1245	1.01129e-12	41.2713	4.34434e-10
ENSRNOG00000005689.6	Yeats4	7:60287378-60294888	1554	0.000122818	-22.1341	0.0084233
ENSRNOG00000005698.2	Ndufa5	4:51586857-51598771	6842	3.72139e-22	25.0618	4.8984e-19
ENSRNOG00000005698.2	Ndufa5	4:51586857-51598771	4101	4.71329e-12	11.5467	1.81241e-09
ENSRNOG00000005796.7	Ctnna1	18:27957958-28055969	3449	3.20617e-05	-6.5872	0.00272498
ENSRNOG00000005802.7	Usp24	5:126005450-126030413	3875	1.87919e-13	13.9698	8.85031e-11
ENSRNOG00000005804.6	Eif3d	7:119185628-119200623	4450	0.000490447	9.5914	0.0265862
ENSRNOG00000005811.2	LOC688655	6:34553366-34555306	1940	2.50479e-08	6.68985	4.91715e-06
ENSRNOG00000005964.5	Nr4a3	5:63781100-63822951	6408	0.000632194	2.76443	0.0323727
ENSRNOG00000006004.6	Phc2	5:146907185-146931782	3133	0.000153214	7.62252	0.0101947
ENSRNOG00000006048.6	Ezh2	4:77345629-77353792	8163	0.000119454	23.9113	0.0082867
ENSRNOG00000006086.7	Lynx1	7:115985227-115988091	1648	3.69379e-05	4.28897	0.00305347
ENSRNOG00000006086.7	Lynx1	7:115982763-115988153	5099	1.07054e-06	3.46286	0.000140015
ENSRNOG00000006086.7	Lynx1	7:115982763-115988092	4402	1.21408e-09	4.76626	3.15568e-07
ENSRNOG00000006206.7	Tmem106b	4:39519450-39539483	6750	2.15729e-06	-23.9216	0.000258748
ENSRNOG00000006217.6	Wiz	7:14374272-14385375	4126	3.07641e-05	20.2723	0.00263432
ENSRNOG00000006305.5	Slc38a2	7:138088648-138094622	3618	0.000102413	2.84038	0.00728168
ENSRNOG00000006327.6	Rcc2	5:159234215-159236314	2099	8.58705e-08	-52.7209	1.45724e-05
ENSRNOG00000006331.4	Elovl5	8:85220871-85287952	3307	3.03513e-07	2.19416	4.56916e-05
ENSRNOG00000006331.4	Elovl5	8:85284374-85287952	2612	1.4392e-21	43.2621	1.82423e-18
ENSRNOG00000006338.7	Lrp6	4:168193910-168200569	2528	0.000275169	2.38962	0.0165991
ENSRNOG00000006420.6	Rbm38	3:171037877-171050498	1791	0.000104203	3.69357	0.00739359
ENSRNOG00000006462.7	Ero1a	15:19617750-19626747	3507	0.000549842	-6.66795	0.0290392
ENSRNOG00000006756.8	Maged1	X:63803187-63810023	3201	9.98676e-07	6.35199	0.000132816
ENSRNOG00000006756.8	Maged1	X:63803188-63806073	1085	0.000610359	2.84009	0.0315378
ENSRNOG00000006763.6	Rbm18	3:15444042-15464068	2659	0.000148018	12.2024	0.00990035
ENSRNOG00000006770.7	Brd4	7:14222098-14225664	3218	0.000788783	-6.94702	0.0387856
ENSRNOG00000006789.6	Ddit3	7:70580197-70585223	1064	5.82177e-07	-45.8075	8.16254e-05
ENSRNOG00000006931.5	Eepd1	8:26711561-26758331	1225	1.14145e-22	-10.3819	1.65061e-19
ENSRNOG00000006931.5	Eepd1	8:26651180-26653048	1445	3.03565e-15	-9.07277	1.78097e-12
ENSRNOG00000006961.7	Snrpb	3:122693490-122703780	3758	0.000110606	-10.9886	0.00779404
ENSRNOG00000006975.6	Wasl	4:51677721-51690347	3651	9.09964e-06	-30.437	0.000908813
ENSRNOG00000007029.3	Dnaja1	5:57028466-57043002	5234	9.58253e-13	4.58908	4.13377e-10
ENSRNOG00000007134.6	Strap	4:171741041-171745738	3008	1.93395e-05	3.78629	0.00175405
ENSRNOG00000007134.6	Strap	4:171740066-171745738	1750	7.00474e-05	-2.88052	0.00527398
ENSRNOG00000007174.5	Utp11	5:142665875-142681275	1833	0.000752611	-5.97043	0.0374836
ENSRNOG00000007175.7	Mier1	5:122670953-122693732	4081	0.000570401	-5.06829	0.0298183
ENSRNOG00000007237.7	Id2	6:44359426-44361999	1474	3.02326e-12	-4.074	1.20309e-09
ENSRNOG00000007349.7	Ascc2	14:84873475-84883024	462	0.000293525	-14.0609	0.0174804
ENSRNOG00000007404.8	Svbp	5:138245578-138251353	721	0.000234499	-6.65641	0.0145915
ENSRNOG00000007478.4	Cry2	3:81314148-81344134	3994	1.58047e-05	-4.26819	0.00146981
ENSRNOG00000007504.7	Actr10	6:93385369-93412625	2553	0.000177422	3.84083	0.0115072
ENSRNOG00000007504.7	Actr10	6:93385403-93400465	704	3.7982e-08	-5.19131	7.15493e-06
ENSRNOG00000007573.4	Hoxb9	10:84115130-84125591	10461	2.05217e-09	2.86482	5.04059e-07
ENSRNOG00000007587.6	Tcp11l2	7:24859043-24893918	2343	0.000560038	-4.08165	0.0294666
ENSRNOG00000007607.4	Nr4a1	7:142912212-142922043	7488	1.69052e-08	5.44431	3.39658e-06
ENSRNOG00000007607.4	Nr4a1	7:142912233-142922043	5185	1.99302e-08	6.06758	3.97327e-06
ENSRNOG00000007607.4	Nr4a1	7:142912279-142920676	2980	9.13511e-07	-37.034	0.000122923
ENSRNOG00000007611.5	Hoxb7	10:84137696-84138642	946	4.99995e-06	-8.12399	0.000538662
ENSRNOG00000007671.4	Smu1	5:57042609-57056711	1507	7.37031e-09	-6.84847	1.6032e-06
ENSRNOG00000007730.3	Vom2r53	7:13152548-13192912	38046	1.08692e-05	29.1709	0.00105677
ENSRNOG00000007730.3	Vom2r53	7:13152548-13192912	40364	0.000980172	18.824	0.045526
ENSRNOG00000007730.3	Vom2r53	7:13151591-13192912	23341	6.54143e-05	27.5619	0.00498169
ENSRNOG00000007765.5	Frzb	3:67635600-67659379	1883	2.59751e-06	-2.47301	0.000306184
ENSRNOG00000007766.6	Pqbp1	X:15449162-15453130	1010	9.7769e-15	90.2611	5.31108e-12
ENSRNOG00000007793.6	Pnrc1	5:48501387-48505412	2598	1.79628e-09	3.21123	4.50914e-07
ENSRNOG00000007849.6	Zmat5	14:84938057-84960020	300	0.000463289	-2.4263	0.0254499
ENSRNOG00000007895.5	Pdhb	15:18543970-18547058	1174	8.01792e-05	-36.0526	0.00590531
ENSRNOG00000007901.6	Tmed10	6:109167536-109171921	3762	0.000459201	-2.03262	0.0253066
ENSRNOG00000007947.7	Fam13a	4:89183176-89281325	4380	0.000138223	-5.46976	0.00929969
ENSRNOG00000007992.6	Srsf10	5:154204804-154217061	1533	7.81104e-06	17.9647	0.000794019
ENSRNOG00000007998.5	Ssb	3:56092454-56098290	702	6.15359e-06	-43.0766	0.000642715
ENSRNOG00000008010.5	Hoxb5	10:84152599-84155012	2413	0.000547541	-16.5642	0.0289624
ENSRNOG00000008048.8	Plscr1	8:99713582-99725217	1200	1.45232e-06	3.32305	0.000183043
ENSRNOG00000008074.6	Cyp11a1	8:62798387-62799864	372	1.67006e-09	-8.85692	4.21289e-07
ENSRNOG00000008101.6	Tmem251	6:126622620-126623895	886	0.000270191	2.89131	0.0163468
ENSRNOG00000008140.6	Rpl15	15:8188419-8189814	1154	0.000337405	2.73606	0.0196046
ENSRNOG00000008163.6	Atp6v1g1	5:79367643-79377073	4323	0.000198141	-8.18613	0.0126355
ENSRNOG00000008167.5	Abhd6	15:18664394-18695242	456	0.000196203	-7.00027	0.0125196
ENSRNOG00000008271.7	Fam91a1	7:98319018-98342378	4675	0.000232533	8.9329	0.0144956
ENSRNOG00000008289.7	Slc25a3	7:31816393-31824034	1745	3.64516e-06	8.41843	0.000407678
ENSRNOG00000008338.7	Bsdc1	5:147661587-147689759	2710	3.25637e-05	-5.23056	0.00276078
ENSRNOG00000008487.7	Amotl2	8:111210584-111226220	9286	0.000806108	4.18814	0.0393923
ENSRNOG00000008487.7	Amotl2	8:111210690-111226226	4275	2.74647e-07	3.8849	4.15287e-05
ENSRNOG00000008487.7	Amotl2	8:111210690-111226226	4633	0.00056404	4.15298	0.0296471
ENSRNOG00000008487.7	Amotl2	8:111216408-111226226	3466	5.98065e-06	3.5194	0.000628488
ENSRNOG00000008564.5	Tmem222	5:151461958-151473824	1503	0.000858255	-5.36862	0.041545
ENSRNOG00000008578.8	Cdk16	X:1707284-1718367	3386	2.624e-05	3.24939	0.00229869
ENSRNOG00000008584.7	Rnaseh1	6:47916182-47925582	1390	0.000521959	-21.9504	0.0278586
ENSRNOG00000008688.7	Usp45	5:35916021-35917649	1628	0.000828304	5.47338	0.0402852
ENSRNOG00000008709.6	Arhgap32	8:33277812-33392310	9471	1.3123e-08	11.3382	2.70009e-06
ENSRNOG00000008709.6	Arhgap32	8:33277812-33392310	9474	1.20336e-07	8.24387	1.97362e-05
ENSRNOG00000008709.6	Arhgap32	8:33296458-33392310	9294	5.41975e-32	29.2726	1.91878e-28
ENSRNOG00000008709.6	Arhgap32	8:33296458-33392310	9297	2.12428e-26	17.9262	4.45101e-23
ENSRNOG00000008822.5	Fkbp1a	3:147042793-147043174	308	8.56266e-15	-123.784	4.7265e-12
ENSRNOG00000008931.6	Slc25a21	6:77622213-77625366	3153	6.54553e-05	-11.1867	0.00498169
ENSRNOG00000009029.7	Nptn	8:63443316-63445908	1336	2.76881e-06	-11.3381	0.000322671
ENSRNOG00000009088.7	Txnrd1	7:26946113-26955875	2007	1.033e-09	2.78012	2.72643e-07
ENSRNOG00000009094.4	Nudt4	7:36643816-36660340	3224	1.78948e-08	4.20539	3.5814e-06
ENSRNOG00000009152.7	Caprin1	3:93699738-93710314	4874	0.000124144	-2.13782	0.00849724
ENSRNOG00000009205.6	Lmo4	2:250218145-250232298	6410	0.000130678	4.9927	0.00888526
ENSRNOG00000009233.4	Ankrd49	8:13299551-13304250	2153	0.000957038	-3.09369	0.0450937
ENSRNOG00000009236.6	Necap1	4:155709612-155724802	2519	0.000108477	-2.87353	0.00765977
ENSRNOG00000009245.7	Exosc2	3:10151280-10161989	1905	0.000329353	-4.09092	0.0191693
ENSRNOG00000009255.5	Timm29	8:22626302-22628872	2570	9.20782e-08	-42.6487	1.55744e-05
ENSRNOG00000009271.6	Smarca4	8:22691350-22739777	3677	1.0217e-05	5.80125	0.0009979
ENSRNOG00000009282.7	Nub1	4:6964886-6981369	859	8.73474e-06	-3.31145	0.000880075
ENSRNOG00000009358.6	Osgin2	5:29662297-29671261	2998	8.40214e-09	5.88022	1.80848e-06
ENSRNOG00000009358.6	Osgin2	5:29662297-29666884	4587	0.000270874	6.55662	0.0163785
ENSRNOG00000009358.6	Osgin2	5:29662297-29682070	6534	5.26132e-06	6.14032	0.000563274
ENSRNOG00000009358.6	Osgin2	5:29662297-29682070	3569	5.07204e-09	11.153	1.13452e-06
ENSRNOG00000009360.6	Sh3bp1	7:120125078-120136190	4429	2.86828e-05	3.34391	0.00248722
ENSRNOG00000009439.6	Eef1a1	8:85839787-85842187	2219	7.68056e-05	2.13085	0.00568949
ENSRNOG00000009570.7	Pdxp	7:120139889-120146553	6664	6.53093e-06	19.4528	0.000675257
ENSRNOG00000009570.7	Pdxp	7:120136098-120140485	363	1.03181e-10	18.3206	3.23964e-08
ENSRNOG00000009570.7	Pdxp	7:120140790-120145113	4323	0.000119914	5.30311	0.0083074
ENSRNOG00000009734.4	Akr1b8	4:61771969-61786457	2907	1.00823e-06	110.797	0.000133395
ENSRNOG00000009734.4	Akr1b8	4:61771969-61786457	4635	2.16003e-08	31.4395	4.27304e-06
ENSRNOG00000009756.8	Pacsin2	7:124255880-124286576	426	0.000723992	-6.89421	0.0363305
ENSRNOG00000009766.7	Gpr180	15:103351629-103369745	12261	8.03545e-07	14.3955	0.000109199
ENSRNOG00000009766.7	Gpr180	15:103344285-103369639	3627	2.71946e-12	8.21619	1.10358e-09
ENSRNOG00000009766.7	Gpr180	15:103344898-103369639	5415	1.11114e-08	21.5278	2.33295e-06
ENSRNOG00000009781.8	Dync1i2	3:57817694-57868944	2604	0.000189272	5.12019	0.0121302
ENSRNOG00000009781.8	Dync1i2	3:57817698-57868943	2599	0.000218167	-3.59997	0.0137201
ENSRNOG00000009795.8	Nfib	5:100650478-100688178	1405	2.0863e-05	-2.903	0.00187566
ENSRNOG00000009795.8	Nfib	5:100433066-100439813	6747	0.000244691	-2.50569	0.0150973
ENSRNOG00000009811.6	Cnih1	15:23567531-23581132	3153	1.48285e-09	6.83389	3.78718e-07
ENSRNOG00000009819.7	Vezf1	10:75371709-75382009	3744	5.5208e-06	-29.083	0.000587988
ENSRNOG00000009823.6	Naa38	10:55997769-55998702	774	0.000831253	4.3214	0.0403712
ENSRNOG00000009848.6	Il18	8:54996194-55021878	16014	0.000298529	2.63103	0.017727
ENSRNOG00000009848.6	Il18	8:55015879-55020002	1121	3.67238e-05	3.67551	0.00304312
ENSRNOG00000009910.6	Swap70	1:174908327-174924155	3127	3.72457e-07	4.151	5.50219e-05
ENSRNOG00000009935.5	Xpo1	14:108007219-108030644	1718	7.11271e-05	-8.88764	0.00534598
ENSRNOG00000009935.5	Xpo1	14:108007353-108028033	1200	1.70029e-05	7.72867	0.00156144
ENSRNOG00000010023.6	Slc33a1	2:154520086-154542974	3163	3.48611e-07	24.2275	5.17972e-05
ENSRNOG00000010116.6	Leo1	8:82394733-82406031	1610	0.000786193	-19.5471	0.0386957
ENSRNOG00000010121.5	Lef1	2:236307869-236345099	2014	3.50244e-05	-6.14868	0.00292354
ENSRNOG00000010156.6	Snapc5	8:69127697-69132702	2368	0.000239057	-2.25005	0.0148212
ENSRNOG00000010161.8	Myo10	2:78043531-78078317	9873	4.03025e-07	2.78048	5.91123e-05
ENSRNOG00000010170.5	Tubb4b	3:2441552-2442531	979	1.34953e-06	3.07806	0.000172763
ENSRNOG00000010170.5	Tubb4b	3:2441732-2444365	1731	2.03349e-25	4.63129	3.79598e-22
ENSRNOG00000010205.4	Mturn	4:84854354-84875683	5535	4.59725e-05	-2.56972	0.00367601
ENSRNOG00000010381.7	Mknk1	5:134691845-134700493	323	0.000630837	-3.92914	0.0323194
ENSRNOG00000010389.6	Ndrg2	15:28305812-28307093	1086	1.38652e-16	-40.8911	9.81749e-14
ENSRNOG00000010389.6	Ndrg2	15:28305812-28309372	1553	0.00041965	3.50877	0.0234834
ENSRNOG00000010389.6	Ndrg2	15:28310521-28313862	442	0.000137286	-30.3718	0.00926095
ENSRNOG00000010524.6	Cryab	8:55178288-55182546	1249	0.000727668	2.44436	0.036444
ENSRNOG00000010574.4	Ptpn1	3:164665367-164713415	4492	0.000183171	3.6253	0.0117907
ENSRNOG00000010584.7	Tmem123	8:5976236-5997387	20951	0.000286339	3.9093	0.0171419
ENSRNOG00000010643.7	Kank2	8:22791913-22795784	2760	1.16437e-06	-3.91409	0.000151132
ENSRNOG00000010716.3	Atoh8	4:100067271-100068492	1221	5.81633e-05	7.04201	0.00453426
ENSRNOG00000010716.3	Atoh8	4:100067271-100091367	4674	9.9565e-11	10.0339	3.13569e-08
ENSRNOG00000010838.5	Araf	X:1378779-1389213	3851	5.92329e-05	-10.3679	0.00460018
ENSRNOG00000010873.7	Pithd1	5:154322441-154333217	1802	8.41638e-13	4.3475	3.64603e-10
ENSRNOG00000010984.6	Anxa11	16:3866045-3884010	6853	3.22136e-06	12.7942	0.000367325
ENSRNOG00000010984.6	Anxa11	16:3866045-3884010	6620	8.18602e-05	9.51863	0.00600757
ENSRNOG00000011154.6	Adgrf5	9:20091118-20095461	4343	3.02061e-05	-7.43143	0.00259086
ENSRNOG00000011162.5	Smco4	8:14051676-14079978	874	0.0001509	2.26943	0.0100604
ENSRNOG00000011175.8	Hnrnpa2b1	4:81232566-81237557	4340	1.5599e-06	2.05109	0.000194836
ENSRNOG00000011203.6	Farp1	15:106617259-106625837	2419	9.90425e-05	-24.8673	0.0070726
ENSRNOG00000011222.5	Dynll1	12:47074169-47076572	682	3.56972e-08	2.14591	6.76206e-06
ENSRNOG00000011238.6	Tiparp	2:157335486-157342979	2461	7.65035e-05	3.35175	0.0056753
ENSRNOG00000011254.7	Fam76a	5:151087954-151104439	2409	0.000423264	-2.97574	0.0236305
ENSRNOG00000011294.7	Usp33	2:257590469-257602862	5232	0.000688677	5.72504	0.0348136
ENSRNOG00000011310.8	Pde10a	1:52544134-52544601	467	0.000317896	9.51622	0.0186399
ENSRNOG00000011310.8	Pde10a	1:52355919-52397690	6765	1.33869e-24	10.2946	2.36972e-21
ENSRNOG00000011341.7	Rictor	2:56101519-56105811	4292	6.67303e-05	-4.42079	0.00506371
ENSRNOG00000011414.5	Psmc3	3:79876899-79882420	2470	7.45804e-07	4.22681	0.000102232
ENSRNOG00000011414.5	Psmc3	3:79876937-79882329	1856	0.000837993	3.50057	0.0406793
ENSRNOG00000011511.7	Stk24	15:106624363-106629348	4985	2.66632e-09	2.3981	6.39606e-07
ENSRNOG00000011521.8	Filip1	8:87419141-87423626	4485	8.26929e-05	16.5787	0.00606002
ENSRNOG00000011668.6	Nfil3	17:12261599-12278074	16475	4.66154e-12	21.3236	1.79925e-09
ENSRNOG00000011668.6	Nfil3	17:12264073-12277152	13079	2.82869e-13	24.4998	1.29334e-10
ENSRNOG00000011718.6	C1rl	4:157122069-157123679	1147	1.54573e-06	37.1564	0.000193537
ENSRNOG00000011718.6	C1rl	4:157122422-157123443	558	3.04781e-07	-6.1021	4.58154e-05
ENSRNOG00000011745.4	Psma1	1:183742397-183744657	413	4.53079e-12	4.1574	1.75538e-09
ENSRNOG00000011747.5	Tmem205	8:22932174-22937805	727	0.000624116	2.01539	0.032023
ENSRNOG00000011771.3	Ptp4a1	9:37223376-37224945	1569	1.66174e-09	2.56224	4.20223e-07
ENSRNOG00000011771.3	Ptp4a1	9:37230858-37231664	806	9.49988e-08	10.5408	1.59972e-05
ENSRNOG00000011778.6	Blvra	3:119573003-119577806	3085	0.000122818	11.2167	0.0084233
ENSRNOG00000011853.7	Mbd2	18:65813804-65874914	1172	3.18061e-06	6.67168	0.00036324
ENSRNOG00000011891.6	Atp6v1b2	16:22337366-22350235	503	0.000130947	-10.7753	0.00889765
ENSRNOG00000011931.7	Smarca2	1:244754204-244783737	1877	0.00079368	-3.18781	0.0389704
ENSRNOG00000011936.7	Abhd14a	8:115141538-115149589	1463	9.00057e-05	-5.49159	0.00650308
ENSRNOG00000011977.6	Sema5a	2:85799383-85809765	7905	0.000980172	-12.6801	0.045526
ENSRNOG00000011987.3	Cd2ap	9:20845782-20861941	4136	6.59556e-05	-3.35176	0.00501234
ENSRNOG00000012084.5	Xpnpep1	1:273708189-273712652	689	5.21142e-06	-43.4783	0.00055879
ENSRNOG00000012091.5	Ppa2	2:238544678-238606905	957	0.000494175	-3.99911	0.0267318
ENSRNOG00000012099.6	Tent2	2:22746289-22798567	3456	0.000570356	-11.0548	0.0298183
ENSRNOG00000012106.4	Dnaja4	8:59291240-59295639	4299	2.60136e-23	16.8427	4.17315e-20
ENSRNOG00000012106.4	Dnaja4	8:59278899-59289987	2144	5.44633e-08	25.0048	9.84463e-06
ENSRNOG00000012106.4	Dnaja4	8:59278899-59289987	1234	5.27152e-36	14.5681	2.46012e-32
ENSRNOG00000012123.3	Fdx1	8:56372876-56393670	6336	1.05562e-06	2.35392	0.000138417
ENSRNOG00000012166.7	Adal	3:113093608-113119748	12890	0.00043958	-6.68985	0.0244087
ENSRNOG00000012314.4	Slirp	6:111476767-111483580	747	8.56617e-07	-4.85317	0.00011557
ENSRNOG00000012329.6	Saraf	16:61735180-61740990	1505	9.72977e-06	-42.7715	0.000960534
ENSRNOG00000012386.6	Zbtb38	8:104585706-104622034	8009	3.61503e-06	2.60334	0.000405191
ENSRNOG00000012559.6	Man1b1	3:2560496-2569049	3595	1.41868e-07	9.52141	2.27587e-05
ENSRNOG00000012561.8	Arhgef10	16:79725633-79765289	3552	8.85429e-06	3.31449	0.000890372
ENSRNOG00000012682.6	Nr5a1	3:22993987-23021559	22084	1.05777e-07	3.88008	1.763e-05
ENSRNOG00000012701.6	Map7	1:15748741-15760499	4456	1.83739e-14	49.7875	9.52751e-12
ENSRNOG00000012804.5	C1qc	5:155254918-155258559	1343	0.000980172	9.83579	0.045526
ENSRNOG00000012860.6	Tmem184c	19:34041210-34057162	1932	1.79948e-05	-9.19339	0.00163933
ENSRNOG00000012872.7	Carnmt1	1:234675117-234705192	4334	3.13031e-07	3.82395	4.69181e-05
ENSRNOG00000012942.6	Satb1	9:2202389-2210996	3455	0.000304078	4.64633	0.0179936
ENSRNOG00000012942.6	Satb1	9:2238833-2278178	5124	6.96262e-06	2.59562	0.000716781
ENSRNOG00000013009.2	Ldha	1:102904659-102909815	1502	0.00010076	-3.8963	0.00717409
ENSRNOG00000013061.6	Tusc3	16:56350346-56396502	804	0.000200221	-7.937	0.0127602
ENSRNOG00000013090.7	Gadd45g	17:13390531-13394181	3650	1.79301e-16	28.144	1.21913e-13
ENSRNOG00000013090.7	Gadd45g	17:13391120-13393240	1914	1.93711e-12	9.61954	8.01949e-10
ENSRNOG00000013090.7	Gadd45g	17:13391120-13393243	1538	8.51875e-11	7.55889	2.72467e-08
ENSRNOG00000013135.7	Ptpn12	4:10693048-10702389	1069	0.000490447	-20.1099	0.0265862
ENSRNOG00000013179.5	Tinagl1	5:148390871-148392736	484	5.82755e-07	2.81331	8.16254e-05
ENSRNOG00000013279.7	LOC681458	1:263997346-264004092	2899	1.7671e-05	3.3985	0.00161556
ENSRNOG00000013328.8	Rbpms	16:62023410-62060486	4064	1.30578e-06	11.6708	0.000168
ENSRNOG00000013370.4	Gfer	10:14059342-14061014	913	0.000923478	-2.03494	0.0439155
ENSRNOG00000013391.8	Sorbs2	16:49625530-49653539	3441	0.000435089	-4.29204	0.0241855
ENSRNOG00000013408.5	Npas2	9:46041618-46045812	1382	0.000490447	12.0976	0.0265862
ENSRNOG00000013408.5	Npas2	9:46075185-46081880	2838	0.000146137	12.6139	0.00980006
ENSRNOG00000013443.8	Tm9sf3	1:260464937-260507978	5885	0.000313406	-2.00332	0.0184292
ENSRNOG00000013469.7	Txndc5	17:26950172-26951744	457	0.000981733	9.24983	0.045526
ENSRNOG00000013469.7	Txndc5	17:26925796-26955291	5982	6.9295e-13	7.24442	3.01462e-10
ENSRNOG00000013479.7	Stard7	3:119711885-119727347	2532	0.000160309	-2.28781	0.0105371
ENSRNOG00000013493.6	Psma4	8:59532388-59539909	1865	6.72261e-08	4.45885	1.18187e-05
ENSRNOG00000013622.5	AABR07032821.1	18:84443530-84444218	688	0.000272861	-8.17556	0.0164695
ENSRNOG00000013654.4	Cbln2	18:83776363-83784046	3585	3.33241e-06	8.36335	0.000378054
ENSRNOG00000013707.7	Spata13	15:41050763-41059194	2358	2.00485e-05	47.1777	0.00181036
ENSRNOG00000013707.7	Spata13	15:41062763-41068350	5587	1.61684e-08	9.03546	3.27419e-06
ENSRNOG00000013712.7	Tex261	4:115445580-115453772	4283	1.43041e-05	2.70395	0.00134982
ENSRNOG00000013712.7	Tex261	4:115445580-115453772	4307	0.000389709	3.34799	0.0221302
ENSRNOG00000013712.7	Tex261	4:115445310-115454164	4576	0.000604514	4.73045	0.0312672
ENSRNOG00000013712.7	Tex261	4:115445310-115453571	4903	6.20292e-05	13.0796	0.0047776
ENSRNOG00000013719.5	Dph5	2:218834471-218866761	1392	0.000297595	-3.00841	0.017692
ENSRNOG00000013751.6	Plpbp	16:69163576-69176055	2066	0.000520497	-3.00071	0.0278185
ENSRNOG00000013756.6	Snrnp48	17:27243778-27253391	1748	9.58907e-07	15.4196	0.000128191
ENSRNOG00000013790.5	Mfsd1	2:164758961-164768581	2413	8.62278e-05	11.7174	0.00629212
ENSRNOG00000013802.8	Slc25a36	8:104962568-104966488	3920	3.95129e-05	-3.48885	0.00322993
ENSRNOG00000013805.6	Tnip2	14:81487620-81490382	2762	0.000981733	9.08554	0.045526
ENSRNOG00000013911.6	Nagk	4:115470549-115481417	7771	1.44296e-05	5.74449	0.00135667
ENSRNOG00000013911.6	Nagk	4:115473810-115487479	8104	9.80039e-09	5.02129	2.08029e-06
ENSRNOG00000013934.6	Dennd2b	1:174137119-174234026	4577	0.000200753	-3.7326	0.0127783
ENSRNOG00000013949.7	Idh2	1:141875540-141893718	1172	0.000540896	-7.8699	0.0286848
ENSRNOG00000014021.6	Matn4	3:160838631-160841123	2414	0.00017849	5.60269	0.0115498
ENSRNOG00000014051.4	Pgrmc2	2:127984742-128002212	3400	0.000706622	-2.3992	0.0356395
ENSRNOG00000014079.7	Stat1	9:54287540-54328112	4174	0.000324035	-2.67747	0.0189316
ENSRNOG00000014117.7	Hmox1	19:14514590-14515459	869	5.97019e-06	5.44476	0.000628032
ENSRNOG00000014155.7	Spart	2:144522071-144549047	4123	0.000327196	-3.78461	0.0190654
ENSRNOG00000014155.7	Spart	2:144534509-144549047	2774	1.06059e-07	-7.60663	1.76484e-05
ENSRNOG00000014192.6	Naa30	15:26049111-26052916	3805	0.000490447	-17.7743	0.0265862
ENSRNOG00000014204.7	Pacsin3	3:80072424-80081129	1890	1.0401e-14	-6.46494	5.62038e-12
ENSRNOG00000014208.5	Dctn3	5:58100463-58106753	481	0.000530487	-2.4468	0.0282349
ENSRNOG00000014287.6	Stk11	7:12441520-12456902	1935	0.000122818	11.6106	0.0084233
ENSRNOG00000014291.7	Elp3	15:48942863-49005060	2769	7.95474e-06	-15.4411	0.000807029
ENSRNOG00000014310.7	Tmtc4	15:109337081-109340953	2945	3.55839e-09	-2.49835	8.28436e-07
ENSRNOG00000014319.7	Smchd1	9:119675755-119685245	1534	0.000490088	-5.35862	0.0265862
ENSRNOG00000014338.6	Slc25a25	3:11442388-11476196	3359	0.000419715	5.25652	0.0234834
ENSRNOG00000014338.6	Slc25a25	3:11442388-11476196	3361	5.07128e-05	7.40303	0.00401428
ENSRNOG00000014338.6	Slc25a25	3:11442342-11452717	3377	0.000782348	4.6586	0.0385914
ENSRNOG00000014366.3	Shc3	17:13770959-13798546	8509	9.86862e-06	4.31952	0.000971439
ENSRNOG00000014426.7	Lox	18:47500311-47513433	4906	5.77503e-10	3.24206	1.5896e-07
ENSRNOG00000014429.5	Arfgap2	3:80081556-80094092	4329	8.98852e-06	3.53879	0.000900343
ENSRNOG00000014448.8	Arntl	1:178038994-178137465	2878	6.98721e-19	20.0791	6.7677e-16
ENSRNOG00000014448.8	Arntl	1:178112691-178137587	2128	2.48573e-16	13.5883	1.65721e-13
ENSRNOG00000014456.6	Coq10b	9:61654503-61678676	5883	0.000387608	2.56506	0.0220823
ENSRNOG00000014525.5	Hspd1	9:61684511-61685204	491	0.000148871	8.86024	0.00993152
ENSRNOG00000014525.5	Hspd1	9:61687895-61690900	1253	6.99303e-06	2.70847	0.000718693
ENSRNOG00000014625.4	Atp5f1d	7:12424263-12430305	3754	0.000154875	9.71549	0.0102852
ENSRNOG00000014648.6	Efnb2	16:86630335-86675291	5214	9.56879e-06	3.88676	0.000949206
ENSRNOG00000014743.5	Hagh	10:14215559-14233638	11216	0.000124407	7.41397	0.00850392
ENSRNOG00000014743.5	Hagh	10:14215797-14230838	1533	1.9222e-16	25.5399	1.29837e-13
ENSRNOG00000014743.5	Hagh	10:14216151-14230838	1901	0.000391413	4.75963	0.0221898
ENSRNOG00000014766.5	Galt	5:58144690-58147959	1351	1.30214e-06	-2.59082	0.000167742
ENSRNOG00000014900.8	Crem	17:57074507-57088306	440	9.02449e-16	5.80203	5.61542e-13
ENSRNOG00000014999.7	Tnpo1	2:29056218-29069827	6198	6.40253e-05	-9.03314	0.00489827
ENSRNOG00000015021.7	Naxd	16:83325238-83342712	2310	0.000114052	-23.8421	0.00798754
ENSRNOG00000015021.7	Naxd	16:83325238-83342667	3290	0.000584989	2.85077	0.0304414
ENSRNOG00000015021.7	Naxd	16:83332608-83342712	500	1.54427e-06	-34.9671	0.000193537
ENSRNOG00000015133.6	Kmt2a	8:49110397-49122202	5738	2.57488e-05	3.20654	0.00226145
ENSRNOG00000015160.5	Gem	5:25346801-25353673	6114	0.000980172	17.4507	0.045526
ENSRNOG00000015160.5	Gem	5:25346806-25353673	6867	5.60526e-06	13.0516	0.000595131
ENSRNOG00000015160.5	Gem	5:25346806-25353673	4759	3.14244e-05	19.497	0.00268414
ENSRNOG00000015160.5	Gem	5:25346801-25353657	6098	0.000461692	6.03786	0.0254029
ENSRNOG00000015160.5	Gem	5:25346801-25353661	4752	0.000324276	7.17821	0.0189316
ENSRNOG00000015233.7	Etfa	8:60028716-60086429	1447	1.70288e-05	-2.51612	0.0015616
ENSRNOG00000015408.5	Vil1	9:81711613-81717293	5680	7.03434e-08	38.9828	1.22617e-05
ENSRNOG00000015408.5	Vil1	9:81715845-81717149	1304	7.46245e-05	13.4675	0.00555195
ENSRNOG00000015408.5	Vil1	9:81711630-81717621	1324	1.49425e-22	94.5888	2.13076e-19
ENSRNOG00000015415.6	Rhoq	6:10532360-10563221	30861	9.20746e-07	13.3186	0.000123411
ENSRNOG00000015415.6	Rhoq	6:10563499-10565834	2335	0.000193351	7.75779	0.0123684
ENSRNOG00000015415.6	Rhoq	6:10550694-10563220	12526	0.000598565	15.8515	0.0310064
ENSRNOG00000015421.6	Slc27a3	2:189760747-189764922	1887	2.64569e-05	-4.04178	0.00231571
ENSRNOG00000015421.6	Slc27a3	2:189760747-189764922	1985	0.000235066	-3.74149	0.0146179
ENSRNOG00000015421.6	Slc27a3	2:189760747-189764922	1871	4.78628e-05	-6.49964	0.00380052
ENSRNOG00000015434.7	Midn	7:12414099-12424418	3897	0.000225551	2.0489	0.0141289
ENSRNOG00000015434.7	Midn	7:12414254-12424245	5014	8.24948e-06	8.6823	0.000834458
ENSRNOG00000015496.6	Tpm4	16:19384587-19393214	1972	0.000969434	-8.65149	0.045526
ENSRNOG00000015496.6	Tpm4	16:19384587-19399903	2169	9.15828e-07	2.37457	0.000123073
ENSRNOG00000015514.7	Bcat1	4:179259307-179327531	2521	1.68079e-05	12.5967	0.00154908
ENSRNOG00000015676.7	Brd9	1:31939584-31954941	1321	0.000493267	13.898	0.0267108
ENSRNOG00000015696.6	Cdk5rap1	3:149835952-149870426	1967	0.000568769	-2.74102	0.0298044
ENSRNOG00000015713.5	Parva	1:177405057-177408269	3212	4.45456e-05	-26.146	0.00357584
ENSRNOG00000015753.6	Epn1	1:72294151-72311956	3153	0.000318756	3.16485	0.0186796
ENSRNOG00000015796.7	Msh2	6:11215962-11274998	2945	5.214e-06	-3.34303	0.00055879
ENSRNOG00000015911.7	Lrp5	1:218837922-218864158	2194	1.28243e-06	-17.9364	0.000165619
ENSRNOG00000015999.6	Cirbp	7:12400334-12405061	2235	6.57971e-11	-77.849	2.13104e-08
ENSRNOG00000015999.6	Cirbp	7:12400334-12405061	2436	4.95881e-07	-3.90052	7.06132e-05
ENSRNOG00000016032.6	Cnnm3	9:43093132-43108486	4112	0.000293269	-7.23685	0.0174753
ENSRNOG00000016064.6	Tkt	16:6610265-6635927	3434	0.000858819	-2.10151	0.0415527
ENSRNOG00000016137.6	Rad23b	5:72130025-72142727	3006	1.79021e-07	-31.3336	2.81061e-05
ENSRNOG00000016145.6	Strn4	1:78755105-78765785	4128	5.05523e-06	4.01099	0.000544047
ENSRNOG00000016156.6	Nptxr	7:121011679-121015329	3650	0.000906504	3.33169	0.0432877
ENSRNOG00000016180.5	Pdp1	5:25577592-25584335	2572	0.000496385	-4.04352	0.0267949
ENSRNOG00000016189.8	Frmd5	3:113478374-113492951	7737	0.000264342	2.19117	0.0160782
ENSRNOG00000016189.8	Frmd5	3:113503504-113525864	5579	1.41523e-10	3.24402	4.36341e-08
ENSRNOG00000016220.7	Rpl12	3:12009460-12010018	464	0.000117231	3.34063	0.00817274
ENSRNOG00000016269.7	Rpl7l1	10:16206872-16213318	6074	2.71328e-05	13.9408	0.00236479
ENSRNOG00000016273.5	Fam136a	4:118160104-118166124	1711	0.000111515	-5.93527	0.00784241
ENSRNOG00000016281.5	Col4a1	16:83603709-83632153	4657	0.000324347	2.67641	0.0189316
ENSRNOG00000016342.4	Atg10	2:20019212-20022852	3640	3.39163e-05	22.5927	0.00285191
ENSRNOG00000016374.8	Fgfr2	1:200590866-200609251	2648	1.14263e-08	3.18715	2.38929e-06
ENSRNOG00000016403.4	Olah	17:78903311-78903928	617	0.000157251	-29.2393	0.0103972
ENSRNOG00000016460.7	Clu	15:42659343-42665867	1368	7.71171e-16	7.80175	4.85743e-13
ENSRNOG00000016478.7	Eif5a	10:56527379-56531651	1168	2.31383e-13	44.0195	1.07009e-10
ENSRNOG00000016483.6	Myo16	16:84574870-84656949	3714	5.58237e-08	21.0012	1.00551e-05
ENSRNOG00000016483.6	Myo16	16:84575149-84649135	3294	2.23052e-05	6.47762	0.00199832
ENSRNOG00000016552.6	Hmgcs1	2:52427469-52445187	3425	0.000117801	-3.31449	0.00819978
ENSRNOG00000016573.6	Dgat2	1:164113384-164143876	2426	9.52958e-05	-2.95156	0.00686116
ENSRNOG00000016596.3	Hspa4	10:38601622-38615143	7908	0.000227779	3.94679	0.0142424
ENSRNOG00000016596.3	Hspa4	10:38632915-38643738	1816	0.000181692	4.71104	0.0117249
ENSRNOG00000016681.5	Mc2r	18:64163044-64178681	5299	0.000233548	-4.03472	0.01455
ENSRNOG00000016779.7	Fam120a	17:16128970-16174327	1444	0.000118943	-4.24158	0.00826804
ENSRNOG00000016791.8	Chka	1:219121831-219126220	2556	0.000309228	4.53724	0.0182567
ENSRNOG00000016930.5	Ube2s	1:72580076-72584484	1295	1.64297e-26	3.22054	3.58902e-23
ENSRNOG00000016936.5	Nadk	5:172986080-172999795	709	1.86195e-11	-74.7033	6.52447e-09
ENSRNOG00000016957.5	Igfbp2	9:80117594-80144814	1013	3.62262e-06	-2.453	0.000405599
ENSRNOG00000017023.8	Tcf25	19:56194122-56213606	2238	0.000172939	11.9437	0.0112663
ENSRNOG00000017037.7	Otud3	5:157354554-157368576	729	0.000891965	21.5424	0.0427174
ENSRNOG00000017116.7	Zfp532	18:61364916-61368447	2575	0.000602412	3.7231	0.0311742
ENSRNOG00000017120.6	Abhd2	1:141024395-141092220	6719	7.06621e-06	-2.70872	0.000724763
ENSRNOG00000017250.4	Gmpr	17:19543320-19581195	1756	9.06889e-05	4.19327	0.00654784
ENSRNOG00000017250.4	Gmpr	17:19537977-19548689	7867	2.35751e-09	15.1501	5.73567e-07
ENSRNOG00000017309.7	Rsrp1	5:153260929-153267405	6249	0.000177919	3.20102	0.0115249
ENSRNOG00000017354.6	Zyx	4:71740331-71749575	3080	1.13291e-06	5.20371	0.000147422
ENSRNOG00000017396.6	Marchf5	1:255848370-255865432	3849	0.000353519	-16.2799	0.0204138
ENSRNOG00000017418.5	Rps3	1:164440066-164441198	203	3.50039e-05	22.9325	0.00292354
ENSRNOG00000017418.5	Rps3	1:164439759-164441172	272	9.5594e-12	-2.25726	3.51779e-09
ENSRNOG00000017418.5	Rps3	1:164440065-164441198	204	7.04012e-06	-6.08691	0.000722809
ENSRNOG00000017420.7	Nudt6	2:124134285-124149661	1109	1.13459e-05	-10.617	0.0010967
ENSRNOG00000017466.6	Kif5b	17:54181418-54219432	6297	0.00014828	-5.81997	0.00991143
ENSRNOG00000017473.6	Ttc25	10:88468635-88488309	1316	0.000889598	-3.84451	0.0426401
ENSRNOG00000017481.6	Sucla2	15:55474867-55516954	1833	2.142e-05	-16.4432	0.00192405
ENSRNOG00000017495.6	Klhdc3	9:16618979-16620772	340	1.28734e-06	-12.1116	0.000166045
ENSRNOG00000017523.5	H6pd	5:166994613-167010348	14712	0.000847285	5.28755	0.0410527
ENSRNOG00000017635.7	Inpp5a	1:211920559-211923969	1935	9.59756e-06	17.1219	0.00095066
ENSRNOG00000017657.5	Phf23	10:56605053-56609236	1774	5.31867e-06	-6.8352	0.00056882
ENSRNOG00000017829.5	Ssu72	5:173149308-173183476	5450	4.03672e-05	6.07687	0.00328668
ENSRNOG00000017829.5	Ssu72	5:173149882-173182721	4121	3.42473e-23	14.346	5.32754e-20
ENSRNOG00000017854.5	Ucp2	1:165506247-165517492	7739	0.000304245	3.20563	0.0179936
ENSRNOG00000017911.8	Tcaf1	4:72119295-72171730	5332	1.64557e-09	-4.4211	4.17162e-07
ENSRNOG00000017911.8	Tcaf1	4:72119295-72126679	3155	0.000461686	-22.7477	0.0254029
ENSRNOG00000017960.6	Deaf1	1:214316449-214317519	1070	0.000980172	18.6569	0.045526
ENSRNOG00000017990.7	Ubap2l	2:189377380-189400328	893	2.99742e-06	-4.63567	0.000347343
ENSRNOG00000018003.6	F2rl1	2:25222327-25235298	2998	6.22167e-07	15.3431	8.66728e-05
ENSRNOG00000018091.6	Gdi2	17:70325600-70325988	388	3.15866e-08	-28.9504	6.09586e-06
ENSRNOG00000018107.5	Zfand5	1:238841835-238857211	10362	1.46515e-05	3.54176	0.00137376
ENSRNOG00000018109.4	Clic4	5:153565420-153625870	4479	9.58956e-14	4.36639	4.71081e-11
ENSRNOG00000018153.6	Rbm5	8:116502892-116512957	3285	0.000497409	3.78665	0.0268361
ENSRNOG00000018164.6	Spcs2	1:164839322-164849774	251	1.64726e-05	-23.2882	0.00152501
ENSRNOG00000018183.7	Ubr4	5:157937935-157943792	1452	7.90609e-08	24.3584	1.35933e-05
ENSRNOG00000018183.7	Ubr4	5:157930495-157957050	4438	0.000159989	2.78495	0.0105228
ENSRNOG00000018183.7	Ubr4	5:157921276-157957050	6513	4.46325e-06	2.555	0.000488531
ENSRNOG00000018186.5	Lamtor5	2:210034094-210039484	912	0.000217314	-2.8459	0.0136974
ENSRNOG00000018225.7	Tp53inp2	3:150910817-150918522	3953	6.77221e-05	2.7351	0.00512005
ENSRNOG00000018233.6	Gas6	16:81243548-81244024	476	0.000980172	-17.479	0.045526
ENSRNOG00000018246.6	Tdp2	17:42229641-42241101	4151	0.000924699	-6.43979	0.0439532
ENSRNOG00000018281.6	Uqcrfs1	17:35677933-35682259	1135	0.000735837	2.00683	0.0367811
ENSRNOG00000018317.6	Aak1	4:118773296-118807825	8184	1.55335e-06	2.94741	0.000194254
ENSRNOG00000018317.6	Aak1	4:118773296-118807823	8182	5.77961e-07	2.95181	8.11755e-05
ENSRNOG00000018477.6	Otud4	19:31895749-31918543	6077	5.08462e-05	2.75594	0.00401877
ENSRNOG00000018487.3	Slc3a2	1:224906500-224912718	2002	6.74538e-43	3.41422	4.94677e-39
ENSRNOG00000018529.7	Csnk1g2	7:11944951-11947367	1425	6.15785e-05	2.89643	0.00475358
ENSRNOG00000018567.7	Slc20a1	3:121732827-121739173	3302	7.18282e-05	3.51096	0.00538685
ENSRNOG00000018569.7	Ahcyl1	2:210438804-210474445	3963	3.55848e-07	-50.7738	5.27199e-05
ENSRNOG00000018683.5	Dock1	1:207366902-207414852	2713	0.000307647	10.9477	0.0181739
ENSRNOG00000018689.6	RGD1305464	8:61913448-61923156	4391	1.25958e-05	3.74925	0.00119742
ENSRNOG00000018691.7	Aurkaip1	5:173256233-173268406	3138	6.26976e-06	3.61917	0.000651535
ENSRNOG00000018691.7	Aurkaip1	5:173256233-173268406	3141	0.000258176	3.07624	0.015778
ENSRNOG00000018708.6	Ppp1ca	1:219439906-219444187	2055	6.49755e-06	-5.17936	0.000672483
ENSRNOG00000018729.5	Rad9a	1:219443987-219452080	2912	0.000490447	-19.4728	0.0265862
ENSRNOG00000018745.6	Sgsm3	7:122203486-122234723	4613	0.00056023	-8.83933	0.0294666
ENSRNOG00000018761.6	Eif3c	1:197963731-197982651	3761	9.84626e-06	5.32599	0.000970169
ENSRNOG00000018795.6	Rpl18a	16:20294952-20295361	317	2.8715e-11	-104.899	9.69791e-09
ENSRNOG00000018795.6	Rpl18a	16:20293132-20295446	910	1.80177e-11	20.4405	6.33521e-09
ENSRNOG00000018796.5	Herpud1	19:11046789-11050947	1608	0.000256992	-3.51224	0.015715
ENSRNOG00000018804.6	Ripor2	17:42325028-42325330	302	0.000980172	8.7634	0.045526
ENSRNOG00000018818.6	Txnl1	18:59056462-59086509	12640	9.75811e-05	4.68926	0.00700605
ENSRNOG00000018823.7	Nisch	16:7273094-7290720	936	0.000953677	-6.22715	0.045018
ENSRNOG00000018847.5	Stx5	1:224946461-224955657	2320	0.000362349	4.57237	0.0208417
ENSRNOG00000018860.7	Mtg1	1:212606756-212620113	1985	0.0008283	-22.2618	0.0402852
ENSRNOG00000018994.5	Psmc4	1:84977123-84986668	2813	5.87055e-05	3.73295	0.00457029
ENSRNOG00000019028.6	Znrf1	19:43821769-43834394	643	9.08612e-06	4.16827	0.000908346
ENSRNOG00000019036.6	Ldhd	19:43834045-43841801	5766	0.000275863	-3.54012	0.0166312
ENSRNOG00000019069.4	Nxf1	1:224956376-224970727	5153	1.74561e-12	2.60398	7.25596e-10
ENSRNOG00000019070.4	St13	7:122584370-122605541	2208	7.8649e-12	4.61199	2.94704e-09
ENSRNOG00000019070.4	St13	7:122584370-122603168	2159	6.05218e-11	-69.2384	1.97263e-08
ENSRNOG00000019090.6	Cct3	2:187680994-187693546	2187	8.71251e-05	3.46668	0.00634857
ENSRNOG00000019091.7	Wtap	1:47958482-47967631	1563	0.000452451	-4.49766	0.0250017
ENSRNOG00000019113.7	Hnrnpk	17:6674355-6676884	1813	8.90218e-05	-14.9744	0.00645015
ENSRNOG00000019180.6	Acsl4	X:113595430-113605381	3979	0.000582831	-9.21915	0.0303576
ENSRNOG00000019189.7	Acat2	1:47985602-47987619	2017	3.7916e-05	2.96599	0.00312176
ENSRNOG00000019189.7	Acat2	1:47966412-47984226	13203	5.66704e-08	10.7141	1.01719e-05
ENSRNOG00000019189.7	Acat2	1:47984467-47985876	1409	8.87806e-11	13.2464	2.81331e-08
ENSRNOG00000019240.7	Ampd2	2:210861624-210874452	4088	8.1425e-05	3.14308	0.00598428
ENSRNOG00000019253.8	Bcar1	19:43932533-43967449	3199	1.34813e-19	3.54537	1.41237e-16
ENSRNOG00000019282.7	Ubqln1	17:6839142-6878854	4897	3.23429e-10	3.84413	9.38036e-08
ENSRNOG00000019390.5	Klhl40	8:130416270-130422280	2839	0.000116517	-8.16986	0.00813241
ENSRNOG00000019450.5	Etf1	18:27697031-27700360	3329	0.0008435	3.45409	0.0409273
ENSRNOG00000019459.5	Oaz1	7:11752119-11754723	1192	6.89671e-10	2.29917	1.85976e-07
ENSRNOG00000019466.7	Agpat2	3:4043645-4056563	3016	3.72765e-06	-3.59378	0.000414646
ENSRNOG00000019466.7	Agpat2	3:4043645-4056563	3111	4.49014e-09	-3.25166	1.02218e-06
ENSRNOG00000019506.7	Dnajb2	9:82436455-82445376	3675	0.000214511	-3.46654	0.0135365
ENSRNOG00000019506.7	Dnajb2	9:82436634-82445376	3758	5.77749e-06	2.67273	0.000610262
ENSRNOG00000019529.5	Btbd1	1:143609675-143620802	2175	1.7697e-05	-6.10521	0.00161651
ENSRNOG00000019536.5	Smim3	18:55744475-55773409	4026	2.30102e-06	9.06288	0.000275024
ENSRNOG00000019556.7	Cd9	4:157977095-158010194	1315	0.000322565	-3.30589	0.0188705
ENSRNOG00000019559.5	Eaf1	16:7595408-7602966	3675	1.27851e-05	2.53327	0.00121429
ENSRNOG00000019584.6	Dlk1	6:133576345-133578665	620	0.000465358	2.33324	0.0255499
ENSRNOG00000019587.6	Ptprn	9:82446310-82461903	4036	9.89825e-24	45.5371	1.6131e-20
ENSRNOG00000019587.6	Ptprn	9:82446310-82448489	1481	4.84767e-07	4.1001	6.93189e-05
ENSRNOG00000019598.8	Vegfa	9:17339360-17355682	7014	0.000315955	2.32869	0.0185472
ENSRNOG00000019622.3	Ackr3	9:97355876-97367445	1983	4.7404e-10	6.66307	1.32977e-07
ENSRNOG00000019639.6	Pgpep1	16:20521939-20531396	1689	0.000442425	-3.94888	0.0245093
ENSRNOG00000019661.3	Gdf15	16:20555107-20557978	1199	1.33373e-05	5.87134	0.0012644
ENSRNOG00000019661.3	Gdf15	16:20556882-20559743	2861	0.000514454	4.51006	0.0275673
ENSRNOG00000019682.3	Timm13	7:11674834-11678442	3020	0.000276613	8.70718	0.0166568
ENSRNOG00000019684.5	Antkmt	10:15159802-15161938	1223	0.000569735	-5.22325	0.0298138
ENSRNOG00000019741.5	Isyna1	16:20589480-20592449	2086	1.65705e-07	2.13306	2.62141e-05
ENSRNOG00000019742.5	Stat3	10:88790208-88802051	3312	8.23143e-06	2.94174	0.000833453
ENSRNOG00000019834.6	Hsp90ab1	9:17817638-17823289	2616	2.72085e-41	5.06484	1.86233e-37
ENSRNOG00000019834.6	Hsp90ab1	9:17817703-17823243	2505	2.60114e-11	3.25036	8.84302e-09
ENSRNOG00000019949.4	Mrps12	1:86920285-86924055	1814	8.27416e-08	44.3855	1.41349e-05
ENSRNOG00000019949.4	Mrps12	1:86920285-86924055	3770	6.76617e-08	11.4403	1.18547e-05
ENSRNOG00000019949.4	Mrps12	1:86920677-86923534	901	9.54286e-32	19.6933	3.26588e-28
ENSRNOG00000019949.4	Mrps12	1:86920677-86924055	1206	0.000148701	2.57546	0.00992774
ENSRNOG00000019949.4	Mrps12	1:86920677-86921492	815	5.1529e-06	3.53721	0.000553398
ENSRNOG00000019978.4	Parg	16:8408771-8458097	2273	4.78733e-09	4.84516	1.07788e-06
ENSRNOG00000019978.4	Parg	16:8409201-8458097	2006	2.71111e-09	4.36452	6.48833e-07
ENSRNOG00000019996.5	Slc16a1	2:207118207-207130498	5427	1.96058e-07	5.60289	3.06382e-05
ENSRNOG00000019996.5	Slc16a1	2:207126310-207130498	4188	6.26828e-05	4.18753	0.00480631
ENSRNOG00000020060.4	Atf5	1:100808240-100811948	1346	2.1478e-05	2.28692	0.00192757
ENSRNOG00000020167.5	Reep5	18:27128376-27160949	4243	0.000926807	5.25538	0.0440126
ENSRNOG00000020194.7	Hes6	9:98549526-98551452	1532	2.7419e-06	-2.69734	0.000320263
ENSRNOG00000020204.7	Srp19	18:27114659-27119074	360	0.000262698	-2.5271	0.0160066
ENSRNOG00000020225.5	Dlgap4	3:152810370-152847424	3416	3.11314e-06	3.62108	0.000357524
ENSRNOG00000020225.5	Dlgap4	3:152810480-152847424	3794	5.59989e-09	4.46939	1.24177e-06
ENSRNOG00000020298.6	Bag3	1:199940977-199965191	2608	4.73306e-08	4.29811	8.66208e-06
ENSRNOG00000020298.6	Bag3	1:199958068-199965191	2063	6.6084e-09	10.0317	1.44052e-06
ENSRNOG00000020298.6	Bag3	1:199959828-199965191	1795	0.000568231	7.22294	0.0298024
ENSRNOG00000020304.5	Pdcd11	1:266866923-266908042	6795	0.000594668	-8.91945	0.0308356
ENSRNOG00000020325.6	Calhm2	1:266908360-266914211	1957	0.000204501	5.03131	0.0129766
ENSRNOG00000020336.6	Ezh1	10:89104019-89139939	4294	0.00011501	-9.87282	0.00804367
ENSRNOG00000020340.7	Brd8	18:27423306-27426664	1351	6.26383e-06	15.3033	0.000651535
ENSRNOG00000020340.7	Brd8	18:27397783-27409782	6709	2.66329e-12	5.92806	1.08508e-09
ENSRNOG00000020347.7	Nup98	1:167213738-167276578	5352	7.99439e-05	3.19821	0.0058922
ENSRNOG00000020433.7	Actn4	1:87078019-87147373	8069	0.000387206	3.53612	0.0220735
ENSRNOG00000020474.6	Pin1	8:21669122-21672923	512	0.000490239	-4.53388	0.0265862
ENSRNOG00000020480.5	Fads1	1:226233934-226238493	1007	0.000475282	-4.00405	0.0260113
ENSRNOG00000020480.5	Fads1	1:226243508-226250215	5487	0.000322338	-8.37388	0.018868
ENSRNOG00000020667.7	Shisa5	8:117793203-117795983	1603	6.19593e-05	-2.38024	0.0047758
ENSRNOG00000020673.4	Pbxip1	2:188763912-188777608	4226	0.000958159	-2.4116	0.0451258
ENSRNOG00000020674.6	Rpl27	10:89352788-89356553	3132	0.000363519	2.51986	0.0208856
ENSRNOG00000020688.6	Ccdc51	8:117820505-117830868	1563	0.000578228	-3.11657	0.0301507
ENSRNOG00000020703.7	Sipa1l3	1:87260738-87298645	3765	8.96253e-06	3.90885	0.000898616
ENSRNOG00000020705.5	Rnls	1:252097950-252101164	1496	0.000316542	4.55695	0.018571
ENSRNOG00000020715.7	Ddb1	1:226680547-226683357	1291	0.000883613	-3.23309	0.0424126
ENSRNOG00000020717.4	Bod1	10:16253708-16266096	1320	0.000625642	2.82676	0.0320693
ENSRNOG00000020726.6	Sipa1	1:221006303-221018358	4123	0.000522061	2.84023	0.0278586
ENSRNOG00000020763.8	Snrnp70	1:101367292-101368460	1090	0.000158418	-4.01587	0.0104462
ENSRNOG00000020853.7	Scap	8:118570502-118628746	4321	1.6942e-05	-11.7537	0.00155746
ENSRNOG00000020922.6	Hspb6	1:89006985-89008578	1593	2.35294e-06	23.2522	0.000280251
ENSRNOG00000020929.5	Lin37	1:89010116-89014487	1644	1.1934e-05	5.09063	0.00114618
ENSRNOG00000021027.6	Dbp	1:101687609-101692845	4031	2.03916e-10	-7.44204	6.06842e-08
ENSRNOG00000021042.6	Psmd4	2:196197360-196208420	3124	8.27493e-06	2.13041	0.000835386
ENSRNOG00000021062.5	Fxyd5	1:89464851-89473675	897	4.56598e-09	3.31388	1.03485e-06
ENSRNOG00000021068.6	Pip5k1a	2:196227648-196241747	2821	2.62631e-06	3.58039	0.000308482
ENSRNOG00000021085.8	Sf1	1:221743651-221750668	4204	0.000382532	3.6736	0.0218314
ENSRNOG00000021117.7	Rps6ka4	1:222087325-222098320	3140	9.55723e-05	-4.56836	0.00687143
ENSRNOG00000021118.5	Nomo1	1:102052604-102069170	2497	2.80869e-09	6.87076	6.67519e-07
ENSRNOG00000021131.6	Mindy1	2:196457492-196462663	1082	3.35859e-08	-5.6555	6.42134e-06
ENSRNOG00000021155.6	Ctsk	2:196652062-196660177	4154	3.00271e-06	-3.49692	0.000347563
ENSRNOG00000021168.7	Anp32e	2:198040498-198057003	3210	0.000390446	-19.8511	0.0221598
ENSRNOG00000021203.8	Atl3	1:222786524-222792339	5815	5.15685e-05	-7.18326	0.00406647
ENSRNOG00000021203.8	Atl3	1:222746424-222792339	7310	0.000955028	-2.96797	0.0450534
ENSRNOG00000021262.5	Slc23a2	3:124632118-124651340	8627	7.36521e-06	4.01703	0.000753173
ENSRNOG00000021262.5	Slc23a2	3:124632265-124640838	7092	0.000361519	3.8056	0.0208056
ENSRNOG00000021264.6	Pcna	3:124880463-124884703	1527	6.67381e-07	2.42717	9.22208e-05
ENSRNOG00000021380.5	Fads6	10:103827362-103848266	7502	7.87821e-07	2.34251	0.000107275
ENSRNOG00000021380.5	Fads6	10:103827362-103847387	7229	0.000925872	5.37298	0.0439885
ENSRNOG00000021392.5	Noc2l	5:173669553-173672668	1044	0.000617719	-4.0732	0.031806
ENSRNOG00000021441.7	Reln	4:9664095-9774259	22544	4.36127e-05	4.831	0.00350918
ENSRNOG00000021441.7	Reln	4:9757629-9774332	1896	8.7838e-06	2.27514	0.00088415
ENSRNOG00000021475.6	Ldah	6:33407234-33459374	20654	4.46004e-17	43.2294	3.44295e-14
ENSRNOG00000021475.6	Ldah	6:33488592-33492280	3688	2.09206e-11	13.5207	7.25648e-09
ENSRNOG00000021475.6	Ldah	6:33418587-33428594	388	1.8226e-17	22.5585	1.48513e-14
ENSRNOG00000021475.6	Ldah	6:33407234-33440821	2101	2.65793e-10	40.888	7.86425e-08
ENSRNOG00000021475.6	Ldah	6:33489136-33491877	2741	1.82152e-10	25.3228	5.48433e-08
ENSRNOG00000021475.6	Ldah	6:33467166-33491877	2339	0.000901453	7.5298	0.0431077
ENSRNOG00000021524.4	Mrap	11:30903396-30917388	4387	2.89868e-05	2.20836	0.00250934
ENSRNOG00000021524.4	Mrap	11:30903396-30917388	4335	0.000122818	19.9999	0.0084233
ENSRNOG00000021524.4	Mrap	11:30903396-30917388	4330	4.33426e-06	2.87056	0.000475934
ENSRNOG00000021525.6	Nbeal1	9:67106278-67118347	8358	6.14664e-05	-23.3969	0.0047485
ENSRNOG00000021637.6	Ddx46	17:9471317-9484457	7276	2.42759e-06	3.8578	0.000288249
ENSRNOG00000021719.7	Slfn5	10:70298486-70303039	566	8.9097e-06	-7.28234	0.000895067
ENSRNOG00000021719.7	Slfn5	10:70302596-70312096	5753	2.05479e-19	-6.58787	2.08876e-16
ENSRNOG00000021729.6	Iqub	4:51480145-51496098	8762	5.69139e-06	28.6643	0.000601786
ENSRNOG00000021729.6	Iqub	4:51480145-51492491	11648	0.000188345	24.0754	0.0120859
ENSRNOG00000021729.6	Iqub	4:51526730-51529261	2531	1.53667e-06	37.6901	0.000192872
ENSRNOG00000021729.6	Iqub	4:51574979-51579025	3303	1.15579e-05	28.3923	0.00111318
ENSRNOG00000021729.6	Iqub	4:51579240-51583350	4110	3.18925e-07	34.4006	4.76623e-05
ENSRNOG00000021732.5	Hsf1	7:117538522-117565478	4054	2.34266e-15	14.6208	1.39838e-12
ENSRNOG00000021732.5	Hsf1	7:117538522-117565478	3650	0.000513684	3.38808	0.0275548
ENSRNOG00000021732.5	Hsf1	7:117538522-117561406	1443	1.98338e-13	100.428	9.29835e-11
ENSRNOG00000021732.5	Hsf1	7:117564633-117578084	5151	1.19087e-20	19.1583	1.3894e-17
ENSRNOG00000021808.4	Tecr	19:24705927-24732050	1492	0.000980172	19.4142	0.045526
ENSRNOG00000021916.5	Slc16a12	1:252976014-253000769	3980	1.57766e-06	-3.24382	0.000196814
ENSRNOG00000021984.6	Rgs7	13:93094394-93096032	627	3.14021e-08	6.63465	6.07167e-06
ENSRNOG00000021984.6	Rgs7	13:93094488-93095878	379	5.77757e-07	9.15642	8.11755e-05
ENSRNOG00000022189.6	Htatip2	1:105094408-105109701	1913	1.60743e-06	5.19975	0.000200042
ENSRNOG00000022392.3	Hspb8	12:45905213-45920014	1931	6.2591e-20	9.45309	6.98502e-17
ENSRNOG00000022392.3	Hspb8	12:45912588-45920014	1092	1.97277e-06	5.35138	0.000238568
ENSRNOG00000022500.4	Rwdd4	16:47856520-47858673	2153	1.5996e-05	-5.31543	0.00148357
ENSRNOG00000022586.4	Cdk9	3:11742265-11746533	1699	0.000771836	6.1669	0.0382454
ENSRNOG00000022619.6	Fth1	1:226030284-226033230	1485	2.61076e-44	5.5199	2.68047e-40
ENSRNOG00000022681.5	RGD1561113	3:11408079-11410952	740	0.000883187	2.81669	0.042412
ENSRNOG00000022922.6	Slc25a12	3:57881519-57883619	2100	3.23904e-05	-2.42069	0.00274837
ENSRNOG00000022938.6	Ap4e1	3:119552564-119567328	579	2.25402e-05	2.12598	0.00201144
ENSRNOG00000023226.4	S100a10	2:193892461-193901239	703	6.81623e-10	2.10985	1.8465e-07
ENSRNOG00000023257.5	Adamts9	4:124660253-124710579	3336	2.84334e-08	7.49289	5.51844e-06
ENSRNOG00000023257.5	Adamts9	4:124767347-124783029	1192	0.000747754	5.62165	0.0373223
ENSRNOG00000023257.5	Adamts9	4:124660254-124686040	2924	2.13562e-06	7.00849	0.00025645
ENSRNOG00000023258.6	Nfkb1	2:240773455-240795014	2549	0.000296336	2.58856	0.0176274
ENSRNOG00000023278.7	Sec61a2	17:76379938-76387004	2816	0.000980172	-17.7066	0.045526
ENSRNOG00000023465.4	Depp1	4:148782410-148785343	2117	2.3689e-05	3.11206	0.00209668
ENSRNOG00000023509.6	Irs2	16:83842991-83848658	5667	6.26043e-07	8.43438	8.70946e-05
ENSRNOG00000023520.5	Cs	7:2768575-2780379	3450	0.000404934	3.17851	0.0228306
ENSRNOG00000023546.5	Hspb1	12:23839815-23840779	302	0.000245421	12.3201	0.0150973
ENSRNOG00000023546.5	Hspb1	12:23839305-23841347	1270	1.39656e-10	5.52681	4.31882e-08
ENSRNOG00000023639.5	Rpusd1	10:15099008-15103035	1919	0.000971732	-4.57988	0.045526
ENSRNOG00000024336.5	Senp6	8:87485316-87540470	3009	8.9771e-05	6.28281	0.00649827
ENSRNOG00000024349.6	Cbarp	7:12432845-12434308	1463	0.000301841	4.82861	0.017872
ENSRNOG00000024428.4	Kif20a	18:27428190-27432814	2278	1.75759e-05	17.9472	0.0016083
ENSRNOG00000024578.7	Ttyh2	10:103237148-103249051	1775	5.92915e-05	-7.29577	0.00460125
ENSRNOG00000024757.6	AABR07069219.1	8:12897737-12928017	5189	7.56966e-05	-2.08136	0.00562357
ENSRNOG00000024808.5	Stk39	3:54359448-54566332	2902	0.000181827	-2.42165	0.0117262
ENSRNOG00000025338.7	Msi2	10:75673563-75742554	6115	5.78734e-06	3.33592	0.000610674
ENSRNOG00000025372.5	Glce	8:67006587-67040010	4730	7.23854e-05	-6.29316	0.005414
ENSRNOG00000025484.3	Tmem177	13:35929818-35933271	1473	6.5694e-06	-12.1003	0.000678551
ENSRNOG00000025509.7	Apbb2	14:43510622-43527758	6516	8.15019e-05	4.21744	0.00598555
ENSRNOG00000025608.4	Lrat	2:181904563-181905475	912	0.000269685	3.04922	0.0163258
ENSRNOG00000025701.5	Nifk	13:34267259-34283680	8085	1.56892e-05	12.5341	0.00146172
ENSRNOG00000025725.7	Ly6k	7:116065145-116072822	7204	0.000444088	2.35677	0.0245778
ENSRNOG00000025764.5	AC128848.1	19:11302371-11303183	350	3.24819e-06	-2.75296	0.000369724
ENSRNOG00000025823.4	Rbm46	2:181830537-181874227	3582	0.00098154	-4.04343	0.045526
ENSRNOG00000025892.6	Set	3:8635502-8636965	697	5.37214e-07	-5.07391	7.58676e-05
ENSRNOG00000025936.5	Rpl6	12:40881132-40882005	873	0.000822183	2.42398	0.0400824
ENSRNOG00000026048.6	Gbf1	1:266014160-266033156	4525	0.000120128	2.4096	0.00831661
ENSRNOG00000026120.7	Fam8a1	17:18413092-18420254	3077	3.2687e-05	-4.03145	0.00276895
ENSRNOG00000026124.5	Id3	5:154489497-154491177	1565	0.000211273	28.2252	0.0133732
ENSRNOG00000026793.5	Nt5dc3	7:27360829-27367398	4505	0.000751288	3.23277	0.0374605
ENSRNOG00000026880.6	Usp38	19:30693488-30699926	2769	0.000191896	2.65792	0.012283
ENSRNOG00000027089.6	Ell2	2:2514471-2528050	5079	9.42176e-16	6.39978	5.8273e-13
ENSRNOG00000027145.6	Rora	8:75576082-75616478	10840	0.000864813	3.7409	0.041764
ENSRNOG00000027151.5	Lrrc58	11:65746882-65762331	7043	1.82899e-13	7.96896	8.69362e-11
ENSRNOG00000027151.5	Lrrc58	11:65746882-65762331	12686	2.52161e-06	5.66025	0.000298265
ENSRNOG00000027151.5	Lrrc58	11:65746882-65762331	11611	4.83599e-06	6.28751	0.000523746
ENSRNOG00000027151.5	Lrrc58	11:65747035-65760167	9294	0.000293253	7.01836	0.0174753
ENSRNOG00000027151.5	Lrrc58	11:65747035-65760167	1963	3.19535e-23	25.3551	5.04717e-20
ENSRNOG00000027193.4	AABR07051376.1	3:7038309-7040613	2304	0.000928527	-2.168	0.0440739
ENSRNOG00000027300.6	Ttc7b	6:124316443-124389420	1849	0.000151657	9.9673	0.0101042
ENSRNOG00000027357.4	Sox17	5:14893125-14895907	2345	0.000545629	3.52753	0.0288761
ENSRNOG00000027405.6	Ccp110	1:188414193-188414838	645	2.27977e-36	239.765	1.11459e-32
ENSRNOG00000027405.6	Ccp110	1:188415075-188437895	5534	2.11733e-21	131.254	2.61911e-18
ENSRNOG00000027405.6	Ccp110	1:188415075-188420653	3740	9.16958e-14	108.237	4.54802e-11
ENSRNOG00000027405.6	Ccp110	1:188442121-188444995	2874	1.64988e-12	46.8506	6.8859e-10
ENSRNOG00000027405.6	Ccp110	1:188416986-188437895	3623	4.65218e-05	16.4039	0.00371223
ENSRNOG00000027405.6	Ccp110	1:188440530-188444995	1951	5.36717e-35	31.7224	2.20419e-31
ENSRNOG00000027514.6	Ube2m	1:65540198-65543707	2040	8.20136e-05	13.8652	0.00601453
ENSRNOG00000027654.4	Appbp2	10:72503352-72527427	5740	2.54856e-06	-33.727	0.00030076
ENSRNOG00000027888.6	Cmss1	11:45304067-45330494	983	6.43716e-05	-4.63495	0.00491743
ENSRNOG00000027906.7	Ankrd11	19:55717557-55737503	2532	0.00088792	2.61128	0.0425795
ENSRNOG00000027938.5	Jcad	17:55667647-55677980	6600	0.000873237	2.64073	0.0421114
ENSRNOG00000028103.5	Psmd3	10:86598979-86611188	2677	4.80274e-06	4.77744	0.000520694
ENSRNOG00000028155.6	Dnaaf2	6:91480789-91490366	3650	2.50504e-34	26.8645	9.89202e-31
ENSRNOG00000028155.6	Dnaaf2	6:91482372-91490184	4964	7.75643e-08	19.5325	1.33841e-05
ENSRNOG00000028155.6	Dnaaf2	6:91480789-91490366	6498	1.43175e-08	20.6274	2.91779e-06
ENSRNOG00000028198.5	Sh2b3	12:40262175-40266889	4371	6.4143e-05	-26.3916	0.00490362
ENSRNOG00000028266.4	Lrrc55	3:72593569-72594339	770	0.000697674	-10.1082	0.0352338
ENSRNOG00000028323.6	Dhrsx	12:18516869-18521892	1721	3.39862e-17	127.605	2.66363e-14
ENSRNOG00000028652.4	Map10	19:58500610-58514937	14188	8.3524e-08	20.3191	1.42449e-05
ENSRNOG00000028652.4	Map10	19:58500610-58514937	14327	2.19927e-06	32.1125	0.000263169
ENSRNOG00000028711.3	Dgat1	7:117564633-117571060	3798	9.51914e-12	48.5016	3.51558e-09
ENSRNOG00000028711.3	Dgat1	7:117564633-117571060	3881	1.13547e-05	14.0192	0.0010967
ENSRNOG00000028711.3	Dgat1	7:117564633-117571060	3369	2.42037e-07	27.5399	3.70342e-05
ENSRNOG00000028733.6	Prkar1b	12:17679824-17713567	1791	1.44143e-06	12.7547	0.00018248
ENSRNOG00000028822.4	Bex3	X:106823555-106825068	1027	3.14216e-05	2.81413	0.00268414
ENSRNOG00000028822.4	Bex3	X:106823559-106825022	1023	0.000135159	2.22615	0.00913239
ENSRNOG00000028834.5	Polr2a	10:56339276-56342855	2584	0.000183516	2.95391	0.0118055
ENSRNOG00000028895.4	Rtp4	11:80638944-80644086	1896	1.53335e-05	-4.87154	0.00143118
ENSRNOG00000028930.6	Dab2	2:55716873-55769962	4661	0.000472323	-2.24676	0.025877
ENSRNOG00000029028.5	Mknk2	7:11908057-11919342	3881	0.000263942	6.28133	0.0160634
ENSRNOG00000029178.6	Abcc5	11:84395950-84399543	354	0.000869221	-2.18588	0.0419572
ENSRNOG00000029394.5	Dusp8	1:215028393-215033606	4141	0.000688575	3.23742	0.0348136
ENSRNOG00000029614.5	Robo1	11:10080050-10141977	2342	5.14587e-08	3.78369	9.38413e-06
ENSRNOG00000030091.6	Dusp14	10:71363687-71382100	1381	1.95437e-09	21.9171	4.84674e-07
ENSRNOG00000030091.6	Dusp14	10:71363687-71382078	1359	1.28317e-08	22.0809	2.64994e-06
ENSRNOG00000030111.4	Cyp11b3	7:116249390-116255228	2604	3.86885e-10	3.02883	1.10337e-07
ENSRNOG00000030111.4	Cyp11b3	7:116254193-116255227	664	2.02454e-10	-3.34487	6.04244e-08
ENSRNOG00000030273.5	Zfp563	7:15412381-15414365	1984	0.000245421	14.9938	0.0150973
ENSRNOG00000030447.5	AC105662.1	5:173148952-173153557	799	0.000311157	10.6969	0.0183356
ENSRNOG00000030625.6	Tf	8:111694277-111721303	2612	2.22351e-07	9.32889	3.43807e-05
ENSRNOG00000030625.6	Tf	8:111694294-111701181	922	5.96802e-08	4.24891	1.06378e-05
ENSRNOG00000030625.6	Tf	8:111694294-111721303	2595	1.15508e-16	40.7777	8.29316e-14
ENSRNOG00000030644.4	Mt-nd1	MT:2848-14375	389	7.98424e-08	-4.97283	1.36624e-05
ENSRNOG00000030667.6	Ppm1b	6:8220193-8280127	20639	0.000224496	3.93363	0.0140714
ENSRNOG00000030712.6	RT1-A2	20:5375101-5377561	1384	0.000214015	-5.1193	0.0135135
ENSRNOG00000030729.5	C4b	20:4303285-4304332	858	8.43916e-08	3.67912	1.4369e-05
ENSRNOG00000030729.5	C4b	20:4303079-4304416	499	4.08538e-09	3.52947	9.36262e-07
ENSRNOG00000030790.5	Ctnnd1	3:72015292-72053049	2154	9.54524e-05	-12.5888	0.00686762
ENSRNOG00000030790.5	Ctnnd1	3:72001889-72014569	3191	2.6015e-06	-2.78243	0.000306303
ENSRNOG00000030862.5	Atp6v1h	5:14350835-14356761	886	3.7996e-05	5.50772	0.00312584
ENSRNOG00000031081.4	Stat2	7:2691307-2707768	4112	0.000553406	-5.38527	0.0291854
ENSRNOG00000031081.4	Stat2	7:2691307-2707767	4111	1.66406e-05	-9.02487	0.00153762
ENSRNOG00000031167.4	AABR07054319.1	3:147608855-147615859	4321	2.97482e-05	2.14423	0.00256444
ENSRNOG00000031216.3	AABR07055776.1	7:9968854-9978721	9867	0.000535347	2.55118	0.0284493
ENSRNOG00000031216.3	AABR07055776.1	7:9974046-9976965	2919	3.63095e-08	3.77972	6.86537e-06
ENSRNOG00000031216.3	AABR07055776.1	7:9974046-9978638	4386	1.12708e-09	12.6351	2.95951e-07
ENSRNOG00000031391.4	Ceacam16	1:80773818-80776171	750	0.000128814	2.73534	0.00877012
ENSRNOG00000031662.4	Slc6a5	1:105270430-105336371	34362	0.00075997	2.54863	0.0377509
ENSRNOG00000031662.4	Slc6a5	1:105319796-105336372	5072	2.83433e-13	2.5443	1.29334e-10
ENSRNOG00000031766.3	Mt-cyb	MT:6885-14363	217	1.53563e-10	-3.78677	4.70637e-08
ENSRNOG00000031766.3	Mt-cyb	MT:8316-13825	179	3.04251e-09	-8.13003	7.16454e-07
ENSRNOG00000031778.3	Mef2d	2:187524370-187568249	10138	0.000862006	6.17305	0.0416873
ENSRNOG00000032258.4	Swt1	13:68728138-68761146	2156	0.000929454	4.95887	0.0440975
ENSRNOG00000032327.4	Pdia5	11:68547243-68579135	6586	0.000144608	3.4203	0.00971024
ENSRNOG00000032327.4	Pdia5	11:68547243-68579135	6605	8.72824e-09	7.1487	1.87083e-06
ENSRNOG00000032398.4	RGD1562136	9:111335095-111347430	2593	6.19155e-08	-7.69142	1.09412e-05
ENSRNOG00000032639.4	Foxo6	5:139207205-139227294	2824	0.000881197	-3.75903	0.0423759
ENSRNOG00000032669.5	Serpina1	6:127628149-127633777	5628	9.83641e-07	23.2726	0.000130986
ENSRNOG00000032669.5	Serpina1	6:127610240-127627591	1544	0.000564238	3.37007	0.0296471
ENSRNOG00000032669.5	Serpina1	6:127629186-127631686	1562	2.35554e-13	25.0834	1.0845e-10
ENSRNOG00000032677.3	Tssc4	1:216252879-216256610	3731	0.000482236	2.31203	0.0263357
ENSRNOG00000032917.3	Zfand2a	12:17259365-17263479	2804	1.94488e-08	13.7872	3.88484e-06
ENSRNOG00000032917.3	Zfand2a	12:17254532-17263479	2891	3.53277e-38	49.5453	2.13358e-34
ENSRNOG00000032917.3	Zfand2a	12:17254532-17263479	3059	1.99088e-09	22.8578	4.92539e-07
ENSRNOG00000033169.5	Cpeb4	10:15984341-16048091	19622	4.12482e-05	7.21178	0.00335044
ENSRNOG00000033169.5	Cpeb4	10:15984518-16047248	7645	1.87033e-06	3.12565	0.00022806
ENSRNOG00000033169.5	Cpeb4	10:15984518-16002630	8982	1.8859e-09	9.04971	4.69965e-07
ENSRNOG00000033169.5	Cpeb4	10:15984518-16047248	8741	0.000514352	2.55951	0.0275673
ENSRNOG00000033215.6	RT1-Db1	20:4087605-4097190	1287	0.000340196	2.79698	0.0197333
ENSRNOG00000033433.4	Csrnp1	8:128659883-128672355	2955	0.000169342	2.73601	0.01106
ENSRNOG00000033776.3	LOC100359668	6:76652047-76653058	1011	7.42402e-06	3.66993	0.000757678
ENSRNOG00000033835.6	Dnm1	3:11338406-11344799	1467	0.000802444	6.81683	0.0392567
ENSRNOG00000033835.6	Dnm1	3:11338406-11344799	1470	0.000880595	4.4396	0.0423759
ENSRNOG00000034066.5	Hspa8	8:44992742-44993207	465	0.00029063	3.57561	0.0173786
ENSRNOG00000034198.4	Tceal9	X:106791365-106794841	1164	7.47052e-12	-90.7334	2.80952e-09
ENSRNOG00000036689.2	P4hb	10:109736457-109744115	1944	0.000120293	-7.9908	0.00831682
ENSRNOG00000036696.4	Hgs	10:109640343-109657461	2842	2.2702e-07	2.92911	3.49973e-05
ENSRNOG00000036696.4	Hgs	10:109644471-109657463	7490	7.33006e-05	5.22983	0.00546752
ENSRNOG00000036697.3	Mafg	10:109802626-109811369	5177	2.05054e-06	3.37879	0.00024681
ENSRNOG00000036697.3	Mafg	10:109802626-109811369	5177	1.94348e-06	3.38442	0.000236005
ENSRNOG00000036698.4	Nploc4	10:109597248-109610240	2884	0.000780528	5.97375	0.0385273
ENSRNOG00000036700.2	Fscn2	10:109521673-109534479	12806	1.42223e-08	13.6608	2.90878e-06
ENSRNOG00000037352.3	RGD1562747	8:69481743-69489891	5114	1.00742e-06	14.0711	0.000133395
ENSRNOG00000037352.3	RGD1562747	8:69487367-69489016	1649	2.29382e-14	13.6321	1.17753e-11
ENSRNOG00000037352.3	RGD1562747	8:69484173-69489016	2252	3.573e-24	10.0147	6.06902e-21
ENSRNOG00000037352.3	RGD1562747	8:69484173-69486938	869	0.000981733	6.77159	0.045526
ENSRNOG00000037658.3	Gprasp2	X:106359925-106363460	3266	2.30488e-06	3.06627	0.000275165
ENSRNOG00000037911.2	LOC680227	X:74324203-74330435	1129	3.78829e-07	2.93154	5.58827e-05
ENSRNOG00000038025.2	Rpp38	17:78918155-78922012	3857	0.00054046	-9.5054	0.0286765
ENSRNOG00000038184.4	Camk2n2	11:83975366-83977488	1341	8.93298e-07	7.56421	0.000120361
ENSRNOG00000038202.3	Calml4	8:67753278-67765365	903	8.7651e-05	-42.996	0.00637332
ENSRNOG00000038218.3	Ndufc1	2:140458589-140464890	3042	2.34468e-05	3.95862	0.00208138
ENSRNOG00000038370.4	AABR07034632.1	11:81711267-81712574	751	6.7006e-05	4.49723	0.00507713
ENSRNOG00000038999.4	RT1-A1	20:5417511-5418604	1093	2.63211e-08	12.5792	5.14739e-06
ENSRNOG00000039017.5	Naa50	11:61515123-61531161	767	4.22138e-05	5.24339	0.00341516
ENSRNOG00000039017.5	Naa50	11:61530053-61530862	809	1.5862e-05	8.82782	0.0014738
ENSRNOG00000039297.4	Mrpl52	15:33069381-33071507	694	1.93286e-10	-7.65815	5.78562e-08
ENSRNOG00000039744.5	RT1-CE4	20:4955017-4956963	1946	4.26459e-29	82.392	1.21624e-25
ENSRNOG00000039744.5	RT1-CE4	20:4916962-4940204	1796	8.08141e-11	2.42544	2.59287e-08
ENSRNOG00000040108.6	RGD1565355	4:14143468-14159738	571	0.000453485	-3.45245	0.0250453
ENSRNOG00000040287.4	Cyp1b1	6:2303724-2321704	17980	1.09685e-07	3.54378	1.81343e-05
ENSRNOG00000040287.4	Cyp1b1	6:2294161-2316295	19104	3.49866e-10	5.23814	1.00337e-07
ENSRNOG00000042411.3	Rps6ka1	5:152098787-152102107	3320	0.000187201	7.41155	0.01202
ENSRNOG00000042421.1	RGD1559909	5:142840773-142845626	4382	1.18625e-06	29.4301	0.000153778
ENSRNOG00000042421.1	RGD1559909	5:142840875-142845377	4031	0.000122818	-18.0994	0.0084233
ENSRNOG00000042592.2	Rgs10	1:199782025-199795907	1984	1.70669e-07	7.88056	2.69579e-05
ENSRNOG00000042592.2	Rgs10	1:199782025-199782610	585	0.000623689	3.69704	0.0320171
ENSRNOG00000042825.2	Cd300le	10:103581123-103590698	1082	0.000334271	27.9171	0.0194335
ENSRNOG00000042879.3	Cep192	18:63561068-63568112	2811	1.46473e-05	-16.0651	0.00137376
ENSRNOG00000043098.1	Mt2A	19:11307956-11308957	609	0.0001588	-2.53428	0.0104619
ENSRNOG00000045637.1	Rnf14	18:31443436-31448480	374	3.95686e-08	-43.1756	7.39983e-06
ENSRNOG00000045765.1	MGC94207	7:117786206-117788611	1803	0.000553462	-2.11419	0.0291854
ENSRNOG00000045791.2	Eif4a3	10:108415200-108418738	576	0.000485134	-20.0978	0.0264659
ENSRNOG00000045821.2	Slc41a3	4:123467546-123481498	2783	0.000230794	2.91191	0.0144046
ENSRNOG00000045918.3	Jarid2	17:20184244-20190577	1148	0.000567777	3.80972	0.0298024
ENSRNOG00000046000.2	Clasrp	1:80491519-80499040	1937	0.000468933	4.71869	0.0257187
ENSRNOG00000046005.1	Scd2	1:264059290-264072443	5139	4.07709e-07	-2.28966	5.97139e-05
ENSRNOG00000046171.3	AABR07035839.1	12:24587995-24595507	5100	1.90474e-05	3.78805	0.00172908
ENSRNOG00000046171.3	AABR07035839.1	12:24585854-24601483	9063	1.29012e-07	13.8433	2.09584e-05
ENSRNOG00000046171.3	AABR07035839.1	12:24587995-24595507	5305	0.000295703	4.01652	0.0175999
ENSRNOG00000046171.3	AABR07035839.1	12:24587995-24595507	5058	8.50942e-14	10.3957	4.26177e-11
ENSRNOG00000046171.3	AABR07035839.1	12:24605869-24619712	1491	7.98734e-10	10.0863	2.13557e-07
ENSRNOG00000046171.3	AABR07035839.1	12:24605869-24619712	1113	6.41664e-10	4.18967	1.74747e-07
ENSRNOG00000046207.1	Cbx4	10:108190233-108196405	2397	1.17491e-11	2.37857	4.24205e-09
ENSRNOG00000046207.1	Cbx4	10:108190233-108195484	3147	0.000815159	3.13219	0.0397777
ENSRNOG00000046484.1	Ccdc160	X:140169583-140177248	1647	6.39611e-20	-8.08509	7.06116e-17
ENSRNOG00000046502.1	Lonp1	9:10428683-10441230	3521	5.70517e-08	3.02321	1.02047e-05
ENSRNOG00000046502.1	Lonp1	9:10428683-10441230	3902	5.32021e-05	2.37949	0.00418295
ENSRNOG00000046560.1	AC109096.1	1:220836091-220836504	413	2.08452e-05	-2.73433	0.00187566
ENSRNOG00000046912.2	Nr1d2	15:8752677-8757311	3412	8.74872e-05	-6.33755	0.00636592
ENSRNOG00000047014.3	Homer1	2:22908310-22970262	8173	0.000526174	10.073	0.0280344
ENSRNOG00000047023.2	Aldh1l1	4:123534125-123542106	578	0.00040994	-13.8376	0.0230875
ENSRNOG00000047072.2	LOC100910656	7:116282763-116284626	456	2.63837e-16	10.1727	1.74762e-13
ENSRNOG00000047072.2	LOC100910656	7:116283663-116284643	207	5.37428e-09	13.5277	1.19952e-06
ENSRNOG00000047072.2	LOC100910656	7:116283878-116284783	905	4.06415e-12	23.9609	1.58056e-09
ENSRNOG00000047072.2	LOC100910656	7:116283663-116284625	189	3.21865e-10	6.80008	9.38036e-08
ENSRNOG00000047072.2	LOC100910656	7:116276646-116284617	181	0.000864496	18.2417	0.041764
ENSRNOG00000047118.2	LOC683897	20:48276096-48294975	1131	1.346e-06	-3.12241	0.000172716
ENSRNOG00000047185.2	Eif3i	5:147796342-147798257	1700	0.000953679	2.47044	0.045018
ENSRNOG00000047250.2	Gmfb	15:23597474-23611592	5143	5.71073e-09	2.63172	1.25551e-06
ENSRNOG00000047581.3	AABR07066700.1	9:12586068-12587258	486	0.000312097	-5.43611	0.0183627
ENSRNOG00000047581.3	AABR07066700.1	9:12586068-12587258	522	0.000120283	-8.59078	0.00831682
ENSRNOG00000047656.2	Gaa	10:108406871-108413001	1787	3.6759e-05	4.71088	0.00304358
ENSRNOG00000047656.2	Gaa	10:108406871-108413059	1898	0.000795495	4.95799	0.0390408
ENSRNOG00000047656.2	Gaa	10:108406871-108413059	3025	0.000125431	4.87879	0.00856251
ENSRNOG00000047706.3	LOC103690108	20:3791524-3791816	292	8.11528e-07	18.3244	0.000110066
ENSRNOG00000047706.3	LOC103690108	20:3791549-3791755	206	1.05486e-06	38.4087	0.000138417
ENSRNOG00000047768.2	Lamb2	8:117280034-117292068	5695	0.000931814	-6.64868	0.0441687
ENSRNOG00000047848.2	Cbr1	11:33813001-33813967	966	0.000211874	6.37551	0.013403
ENSRNOG00000047924.1	Zbtb7c	18:72305408-72307742	2334	0.000980172	10.9481	0.045526
ENSRNOG00000047931.2	Tmsb4x	X:28593281-28595402	724	4.75821e-06	-8.18546	0.000516412
ENSRNOG00000048174.2	Uqcrq	10:38779131-38782499	1486	3.85717e-07	2.41026	5.67357e-05
ENSRNOG00000048277.2	AABR07035787.1	12:22468777-22471092	1358	0.000378011	2.74797	0.0215853
ENSRNOG00000048682.2	Zwint	20:17075092-17091814	3032	1.23736e-05	4.35806	0.00118066
ENSRNOG00000048682.2	Zwint	20:17075597-17091766	2123	3.64869e-11	3.62238	1.21627e-08
ENSRNOG00000048682.2	Zwint	20:17075597-17091766	2284	2.02502e-26	12.2605	4.33144e-23
ENSRNOG00000048723.1	Pros1	7:1281821-1288142	1590	0.000522808	-18.7776	0.027884
ENSRNOG00000048848.2	Ccdc9	1:78212594-78226375	3985	0.000498253	6.30369	0.0268544
ENSRNOG00000048848.2	Ccdc9	1:78219277-78221840	745	1.44212e-05	-5.70578	0.00135667
ENSRNOG00000048848.2	Ccdc9	1:78212563-78226375	5611	8.81284e-05	-2.97817	0.00639445
ENSRNOG00000048961.1	Bhlhe41	4:180230743-180232591	1848	0.000787973	-6.16771	0.0387644
ENSRNOG00000049110.2	Dpm2	3:11587549-11590538	910	0.000786201	-4.88251	0.0386957
ENSRNOG00000049203.3	Pex5	4:157007756-157009061	442	4.00659e-05	11.3471	0.00326733
ENSRNOG00000049270.1	Ppp2r3b	14:1475304-1476355	686	1.17754e-11	14.2932	4.24205e-09
ENSRNOG00000049270.1	Ppp2r3b	14:1469747-1476355	3589	7.27843e-10	8.24524	1.95622e-07
ENSRNOG00000049629.2	Reep2	18:27639806-27641593	1613	0.000417738	2.09189	0.0234367
ENSRNOG00000049661.2	Inafm1	1:78210256-78213329	2605	7.72719e-08	-2.971	1.33561e-05
ENSRNOG00000049683.2	Sh3gl1	9:11031773-11055285	2068	1.49658e-06	-42.9295	0.000188071
ENSRNOG00000049758.2	Tbc1d16	10:108252732-108263543	7507	6.0206e-08	24.7411	1.06944e-05
ENSRNOG00000049758.2	Tbc1d16	10:108252732-108263487	6393	3.80432e-09	15.4989	8.7773e-07
ENSRNOG00000049784.2	Tsnax	19:57771335-57785571	2472	2.74571e-07	-11.4549	4.15287e-05
ENSRNOG00000049876.1	Prkar1a	10:97939753-97941559	1087	0.000245421	22.2126	0.0150973
ENSRNOG00000049876.1	Prkar1a	10:97940591-97959221	3432	2.69621e-05	-2.69016	0.00235191
ENSRNOG00000049900.1	Irf2bp2	19:59497018-59504590	7002	0.000760019	-5.29525	0.0377509
ENSRNOG00000049939.2	AABR07066677.1	9:12346860-12352068	1059	0.000217461	-2.6881	0.0136974
ENSRNOG00000050044.2	Ptp4a2	5:148044045-148061463	9317	0.000132291	6.31298	0.00897706
ENSRNOG00000050044.2	Ptp4a2	5:148050708-148061388	2579	2.08351e-12	2.06477	8.59093e-10
ENSRNOG00000050210.2	RT1-CE10	20:154946-155614	574	0.000261523	11.5931	0.0159445
ENSRNOG00000050343.3	Jmy	2:23068949-23097708	1586	0.000217448	33.7727	0.0136974
ENSRNOG00000050343.3	Jmy	2:23036593-23056610	2953	8.87797e-05	7.5679	0.00643715
ENSRNOG00000050445.2	Gde1	1:188394702-188407365	5082	7.82481e-07	3.8198	0.00010669
ENSRNOG00000050445.2	Gde1	1:188394703-188407407	5127	8.52146e-05	8.22741	0.00622703
ENSRNOG00000050453.2	AABR07002848.1	1:86872972-86887216	576	0.000411112	6.25804	0.0231282
ENSRNOG00000050519.2	Rhoa	8:117114992-117118529	3320	5.76254e-08	2.54038	1.02894e-05
ENSRNOG00000050523.2	AABR07049579.2	5:129370823-129457861	471	4.67889e-05	-11.6188	0.00372695
ENSRNOG00000050578.2	Rheb	4:6826435-6873515	2202	2.52836e-07	4.34595	3.84274e-05
ENSRNOG00000050630.3	#N/A	5:159089066-159095611	1713	0.000165848	8.52709	0.0108456
ENSRNOG00000050636.3	Arhgef10l	5:159093100-159096123	3023	3.52022e-09	15.7684	8.21411e-07
ENSRNOG00000050636.3	Arhgef10l	5:159095241-159095951	710	6.78226e-07	7.55818	9.35934e-05
ENSRNOG00000050786.2	AC103024.2	10:34316836-34317161	325	0.000103532	-5.35236	0.00735108
ENSRNOG00000050998.3	AABR07044397.1	20:4638126-4638832	706	7.75442e-10	11.3227	2.07871e-07
ENSRNOG00000051190.2	AABR07015507.1	14:60059968-60069898	369	3.04343e-06	-2.80298	0.000351088
ENSRNOG00000051196.2	AABR07018038.1	15:36865541-36911165	2005	0.000121041	5.98678	0.00835732
ENSRNOG00000051232.2	Gbe1	11:7422271-7485895	1458	9.69775e-05	-3.55138	0.00696759
ENSRNOG00000051253.1	LOC102553828	1:133713280-133717580	4300	0.000311278	8.15766	0.0183356
ENSRNOG00000051480.1	Fxr1	2:120534771-120538937	4166	0.000678904	4.887	0.0343873
ENSRNOG00000051490.1	Plcg1	3:156727641-156760438	7162	8.7314e-05	-24.2484	0.00635782
ENSRNOG00000051563.1	Giot1	7:13104480-13113677	2691	5.85122e-21	8.55274	6.90512e-18
ENSRNOG00000051563.1	Giot1	7:13112439-13113677	1238	1.63125e-16	10.0669	1.11653e-13
ENSRNOG00000051563.1	Giot1	7:13092572-13108490	15918	1.09958e-16	14.0275	7.95028e-14
ENSRNOG00000051563.1	Giot1	7:13092572-13111070	16156	1.04306e-27	16.7271	2.54979e-24
ENSRNOG00000051952.1	Tes	4:44320234-44323151	2917	1.59508e-09	32.5352	4.05365e-07
ENSRNOG00000051952.1	Tes	4:44320598-44321703	1105	6.9257e-05	3.82386	0.00522456
ENSRNOG00000051952.1	Tes	4:44320234-44323151	2694	0.00091197	3.79853	0.0434689
ENSRNOG00000052025.1	Tle5	7:11013671-11019594	2025	7.11285e-08	3.54051	1.23776e-05
ENSRNOG00000052142.1	Ahsa2	14:108272674-108274151	548	0.000702615	4.72282	0.0354658
ENSRNOG00000052142.1	Ahsa2	14:108272674-108274151	543	0.000433381	6.23074	0.0241166
ENSRNOG00000052142.1	Ahsa2	14:108263487-108273938	3684	6.67031e-12	5.27877	2.53645e-09
ENSRNOG00000052275.1	H2az2	14:86694847-86706648	305	2.63972e-17	-14.0743	2.10093e-14
ENSRNOG00000052357.1	Fosl2	6:25599012-25617913	1855	0.000357784	2.30622	0.0206138
ENSRNOG00000052421.1	AABR07012475.2	2:196588319-196593744	5425	0.000122175	-11.6082	0.00841863
ENSRNOG00000052498.1	Grb14	3:50937400-50939152	534	9.34913e-10	-4.18249	2.4803e-07
ENSRNOG00000052730.1	Psmb3	10:85646484-85654001	3419	1.56872e-12	9.27122	6.60082e-10
ENSRNOG00000052730.1	Psmb3	10:85646484-85654001	2547	1.96419e-06	4.73691	0.00023781
ENSRNOG00000052894.1	Epg5	18:74299930-74399099	25976	3.92075e-05	3.99865	0.00321007
ENSRNOG00000052894.1	Epg5	18:74394164-74396324	2160	3.35118e-12	4.53216	1.31826e-09
ENSRNOG00000052968.1	Hnrnpa3	3:62483767-62484203	436	1.60527e-12	16.3011	6.72706e-10
ENSRNOG00000053070.1	AABR07053749.2	3:124004418-124005426	1008	1.29307e-07	11.6399	2.0973e-05
ENSRNOG00000053210.1	Zc3h11a	13:50228596-50238105	4864	2.07127e-07	3.71397	3.22996e-05
ENSRNOG00000053306.1	Washc1	9:113933994-113936876	2013	7.73829e-06	5.68278	0.000788967
ENSRNOG00000053306.1	Washc1	9:113933994-113936876	1870	0.0002131	2.78466	0.0134723
ENSRNOG00000053577.1	Gramd1b	8:44324065-44338388	14323	6.70599e-10	5.07687	1.82144e-07
ENSRNOG00000053577.1	Gramd1b	8:44324065-44330498	3945	4.56533e-09	2.73344	1.03485e-06
ENSRNOG00000053577.1	Gramd1b	8:44324065-44328062	3997	6.05995e-05	3.21313	0.00468858
ENSRNOG00000053577.1	Gramd1b	8:44162345-44176819	8965	7.7841e-17	3.878	5.79126e-14
ENSRNOG00000053615.1	Mrpl50	5:64784169-64789325	1797	2.23555e-05	-3.85176	0.00200108
ENSRNOG00000054140.1	Myl6	7:2904274-2909478	3127	2.28573e-24	4.72615	3.97756e-21
ENSRNOG00000054140.1	Myl6	7:2904274-2909108	2993	0.000202392	-2.18081	0.0128507
ENSRNOG00000054140.1	Myl6	7:2904275-2909478	3126	2.55294e-26	4.96056	5.2422e-23
ENSRNOG00000054157.1	Nadk2	2:58489119-58505027	2769	2.15667e-08	-17.4224	4.27304e-06
ENSRNOG00000054352.1	Atp6ap1	X:156407945-156415145	2407	0.00080938	2.79328	0.0395145
ENSRNOG00000054446.1	Sltm	8:76977521-77022847	4667	0.000712536	3.82416	0.0358257
ENSRNOG00000054557.1	Lsm14b	3:175408366-175418507	2019	8.1117e-06	17.7923	0.00082214
ENSRNOG00000054557.1	Lsm14b	3:175408408-175419400	2753	5.3922e-10	-7.44299	1.49626e-07
ENSRNOG00000054775.1	Fkbp11	7:140417309-140438786	813	0.000261009	26.3442	0.0159226
ENSRNOG00000054775.1	Fkbp11	7:140417309-140438778	805	5.98082e-07	-3.331	8.36581e-05
ENSRNOG00000054896.1	Pex13	14:108394300-108395095	795	0.000169889	-2.92929	0.0110816
ENSRNOG00000055257.1	Selenof	2:250600657-250634107	1890	1.20739e-09	4.82678	3.14625e-07
ENSRNOG00000055277.1	LOC100362333	5:78383788-78384103	221	0.000223783	-2.93518	0.0140353
ENSRNOG00000055319.1	Mrfap1	14:78974142-78975172	1030	5.04151e-07	-12.2618	7.14934e-05
ENSRNOG00000055365.1	Edem1	4:140913538-140918718	4147	5.87144e-05	-8.50367	0.00457029
ENSRNOG00000055408.1	Gcat	7:120263053-120269451	1571	5.41452e-05	2.09676	0.00425007
ENSRNOG00000055567.1	Fmnl2	3:38650821-38677645	3852	1.6393e-10	6.29667	4.99428e-08
ENSRNOG00000055853.1	Gorasp2	3:56994503-56995379	876	0.000108132	-8.38228	0.0076407
ENSRNOG00000055984.1	Adrm1	3:175548122-175552942	1678	1.64608e-06	3.21502	0.00020411
ENSRNOG00000056297.1	Fmnl3	7:140982420-140984099	708	8.3754e-05	6.90107	0.0061334
ENSRNOG00000056297.1	Fmnl3	7:140982572-140984099	556	4.90251e-06	-31.6789	0.000529276
ENSRNOG00000056427.1	AABR07007717.1	2:25564849-25569501	2211	5.36402e-13	3.67783	2.36362e-10
ENSRNOG00000056457.1	Gpd1	7:141369472-141378955	4068	0.000156322	-5.56684	0.0103479
ENSRNOG00000056596.1	Alas1	8:114927570-114943535	7532	1.79501e-07	33.9336	2.81365e-05
ENSRNOG00000056596.1	Alas1	8:114927620-114941085	5032	4.22531e-10	2.82743	1.19508e-07
ENSRNOG00000056637.1	Abhd16a	20:5093395-5094935	783	3.92707e-06	-3.46252	0.000435412
ENSRNOG00000056853.1	Psma7	3:175418071-175426811	4497	0.0008311	3.29565	0.0403712
ENSRNOG00000056870.1	Gdi1	X:156400619-156407816	3086	3.46152e-08	3.238	6.58137e-06
ENSRNOG00000056889.1	Vps33a	12:38459805-38461963	322	2.57859e-05	-4.82493	0.00226277
ENSRNOG00000056946.1	Scaf1	1:100997733-101004569	4631	3.97898e-05	3.42987	0.00324998
ENSRNOG00000057078.1	Ddit4	20:29509147-29511436	2165	1.12092e-12	16.7919	4.79522e-10
ENSRNOG00000057078.1	Ddit4	20:29509147-29511399	2002	1.38424e-11	29.1603	4.91764e-09
ENSRNOG00000057194.1	Tars2	2:197860946-197870683	1809	3.51166e-05	2.86494	0.00292886
ENSRNOG00000057194.1	Tars2	2:197860946-197861573	627	1.453e-06	-7.18483	0.000183043
ENSRNOG00000057823.1	Ubc	12:36638259-36642734	2742	3.17688e-05	21.5952	0.0027068
ENSRNOG00000057823.1	Ubc	12:36638432-36640452	2020	5.64072e-09	6.08434	1.24813e-06
ENSRNOG00000057823.1	Ubc	12:36638432-36642734	2565	0.000387791	4.71533	0.0220823
ENSRNOG00000058039.1	Acta2	1:252537487-252550419	1546	0.000708757	2.39	0.0356881
ENSRNOG00000058484.1	Anp32a	AABR07024206.1:5607-8624	424	1.21283e-05	-2.32038	0.00116375
ENSRNOG00000058497.1	Fdxr	10:103817703-103832076	8152	6.03243e-06	2.28975	0.000633282
ENSRNOG00000058497.1	Fdxr	10:103817703-103826489	2510	1.66537e-05	2.0098	0.00153762
ENSRNOG00000058561.1	Srrm2	10:13152738-13162955	10007	8.14263e-05	3.26107	0.00598428
ENSRNOG00000058561.1	Srrm2	10:13152738-13162955	9296	2.28501e-05	4.48206	0.00203648
ENSRNOG00000058601.1	AABR07036542.1	12:47841660-47854469	7398	9.78889e-18	23.2147	8.30599e-15
ENSRNOG00000058601.1	AABR07036542.1	12:47841660-47854469	7533	5.25689e-18	22.0864	4.6528e-15
ENSRNOG00000058601.1	AABR07036542.1	12:47841660-47854469	12493	8.9119e-12	16.6387	3.32722e-09
ENSRNOG00000058601.1	AABR07036542.1	12:47841660-47854469	12000	3.04281e-05	5.53308	0.00260773
ENSRNOG00000058601.1	AABR07036542.1	12:47841717-47848813	6780	6.69511e-05	9.92856	0.00507671
ENSRNOG00000058601.1	AABR07036542.1	12:47841717-47848813	1685	8.83365e-22	29.2618	1.13369e-18
ENSRNOG00000058882.1	Emd	X:156452816-156456035	1477	2.94485e-10	3.65391	8.6385e-08
ENSRNOG00000059015.1	Triobp	7:120260139-120265504	3247	1.68996e-08	-3.15753	3.39658e-06
ENSRNOG00000059016.1	Tspan12	4:48852821-48908644	2095	0.000710503	-3.62722	0.0357585
ENSRNOG00000059268.2	Ppp1r10	20:3329676-3335450	3279	1.92447e-09	5.49026	4.78416e-07
ENSRNOG00000059330.1	AABR07004549.1	1:147423002-147427693	632	8.98125e-05	5.38817	0.00649827
ENSRNOG00000059381.1	Mrps6	11:32210825-32240110	29285	0.000117374	8.5897	0.00817556
ENSRNOG00000059459.1	AABR07047256.1	5:25339433-25340989	240	1.01311e-16	12.0917	7.37704e-14
ENSRNOG00000059461.1	B4galt1	5:57120025-57139404	3479	1.02301e-05	-3.22441	0.0009979
ENSRNOG00000060069.1	AABR07059891.1	4:40418731-40420751	1308	0.000430244	-2.39584	0.0239551
ENSRNOG00000060235.1	AABR07044837.2	20:23077569-23084139	3286	0.000490447	19.151	0.0265862
ENSRNOG00000060235.1	AABR07044837.2	20:23077569-23089106	5459	6.10227e-09	46.2587	1.33586e-06
ENSRNOG00000060235.1	AABR07044837.2	20:23077569-23089106	5578	9.9496e-09	39.6846	2.10624e-06
ENSRNOG00000060235.1	AABR07044837.2	20:23085944-23089106	3162	1.0996e-18	60.7874	1.03574e-15
ENSRNOG00000060728.1	Tuba1a	7:140638907-140641131	470	1.09799e-06	3.19154	0.000143241
ENSRNOG00000061040.1	Herc4	20:26816453-26825193	6960	0.000280398	3.22126	0.0168255
ENSRNOG00000061040.1	Herc4	20:26825350-26830943	4226	9.50454e-08	4.67732	1.59972e-05
ENSRNOG00000061080.2	Kmt2c	4:6290417-6294413	2139	0.000207121	-4.01149	0.0131347
ENSRNOG00000061499.1	Kmt2d	7:140489245-140516827	7310	1.97099e-05	2.17368	0.00178292
ENSRNOG00000061607.1	Lmbr1l	7:140585710-140601067	2237	0.000490447	-19.1496	0.0265862
ENSRNOG00000061639.2	AABR07044404.1	20:4774349-4792450	537	6.68445e-08	3.20261	1.17717e-05
ENSRNOG00000062155.1	AC134224.2	1:221151826-221153278	1452	1.52176e-05	2.64647	0.00142424
