# Supplementary material for: Identification of Novel Mrna Isoforms Associated with Acute Heat Stress Response Using RNA-Sequencing Data in The Sprague-Dawley Rats
Source: Preprints.org preprint supplement (doi:10.20944/preprints202211.0380.v1), 2022-11-21
Supplement: Supplementary file 7 [file Table S7 GO analysis of all genes annotated by known transcripts and novel transcripts.xlsx]

## Sheet: Sheet1
Table S7. Significantly enriched biological processes (BPs) terms from differentially expressed transcript corresponding known genes identified in blood, liver and adrenal glands.
Summary of gene set analysis
Tissue (Criteria)	Comparisons	Total genes
Blood (P < 0.05, |FC|>2)	CT vs. H120	185
Liver (P < 0.01, FDR < 0.05, |FC|>2)	CT vs. H30	178
	CT vs. H60	1672
	CT vs. H120	1339
Adrenal glands (P < 0.01, FDR < 0.05, |FC|>2)	CT vs. H30	1234
	CT vs. H60	1416
	CT vs. H120	1226

## Sheet: blood
The significantly (FDR < 0.05) enriched biological process (BP) terms for known genes identified in blood (CT vs. H120).
GO ID	Description	out (167)	All (17705)	Genes	FDR
GO:0002504	antigen processing and presentation of peptide or polysaccharide antigen via MHC class II	8	21	ENSRNOG00000000451;ENSRNOG00000019675;ENSRNOG00000032708;ENSRNOG00000032844;ENSRNOG00000033215;ENSRNOG00000047854;ENSRNOG00000049491;ENSRNOG00000051002	1.53959e-08
GO:0019882	antigen processing and presentation	12	79	ENSRNOG00000000451;ENSRNOG00000000723;ENSRNOG00000019675;ENSRNOG00000032596;ENSRNOG00000032708;ENSRNOG00000032844;ENSRNOG00000033215;ENSRNOG00000039744;ENSRNOG00000047854;ENSRNOG00000049491;ENSRNOG00000050210;ENSRNOG00000051002	1.53959e-08
GO:0048002	antigen processing and presentation of peptide antigen	8	48	ENSRNOG00000000451;ENSRNOG00000000723;ENSRNOG00000019675;ENSRNOG00000032596;ENSRNOG00000032708;ENSRNOG00000032844;ENSRNOG00000039744;ENSRNOG00000050210	1.26941e-05
GO:0002376	immune system process	46	2070	ENSRNOG00000000451;ENSRNOG00000000529;ENSRNOG00000000562;ENSRNOG00000000655;ENSRNOG00000000723;ENSRNOG00000000851;ENSRNOG00000000853;ENSRNOG00000002568;ENSRNOG00000004737;ENSRNOG00000005872;ENSRNOG00000007539;ENSRNOG00000008015;ENSRNOG00000008288;ENSRNOG00000008941;ENSRNOG00000009342;ENSRNOG00000010319;ENSRNOG00000010645;ENSRNOG00000011140;ENSRNOG00000011557;ENSRNOG00000013683;ENSRNOG00000014205;…	1.26941e-05
GO:0006955	immune response	32	1317	ENSRNOG00000000451;ENSRNOG00000000562;ENSRNOG00000000655;ENSRNOG00000000723;ENSRNOG00000000851;ENSRNOG00000000853;ENSRNOG00000002568;ENSRNOG00000004737;ENSRNOG00000007539;ENSRNOG00000008288;ENSRNOG00000009342;ENSRNOG00000010319;ENSRNOG00000010645;ENSRNOG00000011557;ENSRNOG00000017354;ENSRNOG00000017645;ENSRNOG00000018087;ENSRNOG00000019374;ENSRNOG00000019675;ENSRNOG00000020849;ENSRNOG00000032596;…	0.000380175
GO:0010035	response to inorganic substance	18	544	ENSRNOG00000000571;ENSRNOG00000001420;ENSRNOG00000002572;ENSRNOG00000007249;ENSRNOG00000008015;ENSRNOG00000008941;ENSRNOG00000011557;ENSRNOG00000012183;ENSRNOG00000013009;ENSRNOG00000014205;ENSRNOG00000017786;ENSRNOG00000019568;ENSRNOG00000021201;ENSRNOG00000027990;ENSRNOG00000036701;ENSRNOG00000038047;ENSRNOG00000042838;ENSRNOG00000056728	0.00207685
GO:0002495	antigen processing and presentation of peptide antigen via MHC class II	4	14	ENSRNOG00000000451;ENSRNOG00000019675;ENSRNOG00000032708;ENSRNOG00000032844	0.00285819
GO:0097237	cellular response to toxic substance	11	223	ENSRNOG00000000571;ENSRNOG00000001420;ENSRNOG00000008941;ENSRNOG00000011140;ENSRNOG00000011557;ENSRNOG00000012183;ENSRNOG00000014205;ENSRNOG00000029886;ENSRNOG00000034254;ENSRNOG00000047098;ENSRNOG00000047321	0.00285819
GO:0048518	positive regulation of biological process	75	5149	ENSRNOG00000000451;ENSRNOG00000000529;ENSRNOG00000000562;ENSRNOG00000000571;ENSRNOG00000000655;ENSRNOG00000000723;ENSRNOG00000000851;ENSRNOG00000000853;ENSRNOG00000000917;ENSRNOG00000001172;ENSRNOG00000001420;ENSRNOG00000002001;ENSRNOG00000002188;ENSRNOG00000002568;ENSRNOG00000002572;ENSRNOG00000002946;ENSRNOG00000007249;ENSRNOG00000007539;ENSRNOG00000007971;ENSRNOG00000008015;ENSRNOG00000008288;…	0.00285819
GO:0009636	response to toxic substance	17	523	ENSRNOG00000000571;ENSRNOG00000001420;ENSRNOG00000008015;ENSRNOG00000008941;ENSRNOG00000011140;ENSRNOG00000011557;ENSRNOG00000012183;ENSRNOG00000013009;ENSRNOG00000014205;ENSRNOG00000021201;ENSRNOG00000029886;ENSRNOG00000034254;ENSRNOG00000038047;ENSRNOG00000047098;ENSRNOG00000047321;ENSRNOG00000052802;ENSRNOG00000056728	0.00285819
GO:0030036	actin cytoskeleton organization	18	582	ENSRNOG00000000853;ENSRNOG00000005809;ENSRNOG00000006911;ENSRNOG00000009683;ENSRNOG00000010037;ENSRNOG00000010319;ENSRNOG00000013668;ENSRNOG00000013683;ENSRNOG00000014289;ENSRNOG00000015496;ENSRNOG00000017354;ENSRNOG00000017786;ENSRNOG00000019675;ENSRNOG00000019838;ENSRNOG00000025980;ENSRNOG00000034254;ENSRNOG00000036701;ENSRNOG00000047931	0.00285819
GO:0015671	oxygen transport	4	16	ENSRNOG00000029886;ENSRNOG00000047098;ENSRNOG00000047321;ENSRNOG00000060629	0.00330631
GO:0051234	establishment of localization	63	4119	ENSRNOG00000000562;ENSRNOG00000000571;ENSRNOG00000000655;ENSRNOG00000000851;ENSRNOG00000000853;ENSRNOG00000001420;ENSRNOG00000002001;ENSRNOG00000002568;ENSRNOG00000004526;ENSRNOG00000004662;ENSRNOG00000007249;ENSRNOG00000007539;ENSRNOG00000007784;ENSRNOG00000007971;ENSRNOG00000009342;ENSRNOG00000009642;ENSRNOG00000009683;ENSRNOG00000009888;ENSRNOG00000010037;ENSRNOG00000010319;ENSRNOG00000010420;…	0.00430093
GO:0006810	transport	61	4005	ENSRNOG00000000562;ENSRNOG00000000571;ENSRNOG00000000655;ENSRNOG00000000853;ENSRNOG00000001420;ENSRNOG00000002001;ENSRNOG00000002568;ENSRNOG00000004526;ENSRNOG00000004662;ENSRNOG00000007249;ENSRNOG00000007539;ENSRNOG00000007784;ENSRNOG00000009342;ENSRNOG00000009642;ENSRNOG00000009683;ENSRNOG00000009888;ENSRNOG00000010037;ENSRNOG00000010319;ENSRNOG00000010420;ENSRNOG00000010645;ENSRNOG00000010807;…	0.00679474
GO:0007015	actin filament organization	13	361	ENSRNOG00000000853;ENSRNOG00000006911;ENSRNOG00000010319;ENSRNOG00000013668;ENSRNOG00000013683;ENSRNOG00000014289;ENSRNOG00000015496;ENSRNOG00000017354;ENSRNOG00000017786;ENSRNOG00000019675;ENSRNOG00000019838;ENSRNOG00000025980;ENSRNOG00000047931	0.00739728
GO:0097435	supramolecular fiber organization	17	585	ENSRNOG00000000853;ENSRNOG00000006911;ENSRNOG00000007249;ENSRNOG00000010319;ENSRNOG00000013668;ENSRNOG00000013683;ENSRNOG00000014289;ENSRNOG00000015496;ENSRNOG00000017354;ENSRNOG00000017786;ENSRNOG00000018087;ENSRNOG00000019675;ENSRNOG00000019838;ENSRNOG00000025980;ENSRNOG00000036701;ENSRNOG00000047931;ENSRNOG00000050655	0.00739728
GO:0015669	gas transport	4	21	ENSRNOG00000029886;ENSRNOG00000047098;ENSRNOG00000047321;ENSRNOG00000060629	0.00739728
GO:0030029	actin filament-based process	18	650	ENSRNOG00000000853;ENSRNOG00000005809;ENSRNOG00000006911;ENSRNOG00000009683;ENSRNOG00000010037;ENSRNOG00000010319;ENSRNOG00000013668;ENSRNOG00000013683;ENSRNOG00000014289;ENSRNOG00000015496;ENSRNOG00000017354;ENSRNOG00000017786;ENSRNOG00000019675;ENSRNOG00000019838;ENSRNOG00000025980;ENSRNOG00000034254;ENSRNOG00000036701;ENSRNOG00000047931	0.00755333
GO:0065003	protein-containing complex assembly	30	1495	ENSRNOG00000000562;ENSRNOG00000000853;ENSRNOG00000001420;ENSRNOG00000004526;ENSRNOG00000006911;ENSRNOG00000007249;ENSRNOG00000008533;ENSRNOG00000010037;ENSRNOG00000010319;ENSRNOG00000010420;ENSRNOG00000013668;ENSRNOG00000014288;ENSRNOG00000014289;ENSRNOG00000015945;ENSRNOG00000016930;ENSRNOG00000019090;ENSRNOG00000019675;ENSRNOG00000019838;ENSRNOG00000020363;ENSRNOG00000025980;ENSRNOG00000026260;…	0.00976679
GO:0002819	regulation of adaptive immune response	8	143	ENSRNOG00000000655;ENSRNOG00000000723;ENSRNOG00000004737;ENSRNOG00000007539;ENSRNOG00000019675;ENSRNOG00000032596;ENSRNOG00000032708;ENSRNOG00000050210	0.00976679
GO:0070887	cellular response to chemical stimulus	43	2532	ENSRNOG00000000529;ENSRNOG00000000571;ENSRNOG00000000655;ENSRNOG00000000851;ENSRNOG00000000853;ENSRNOG00000001420;ENSRNOG00000002568;ENSRNOG00000002572;ENSRNOG00000002946;ENSRNOG00000005872;ENSRNOG00000007249;ENSRNOG00000007971;ENSRNOG00000008015;ENSRNOG00000008941;ENSRNOG00000009683;ENSRNOG00000010645;ENSRNOG00000011054;ENSRNOG00000011140;ENSRNOG00000011557;ENSRNOG00000012183;ENSRNOG00000012957;…	0.00976679
GO:0002682	regulation of immune system process	25	1146	ENSRNOG00000000451;ENSRNOG00000000529;ENSRNOG00000000655;ENSRNOG00000000723;ENSRNOG00000000851;ENSRNOG00000000853;ENSRNOG00000002568;ENSRNOG00000004737;ENSRNOG00000007539;ENSRNOG00000008015;ENSRNOG00000008941;ENSRNOG00000009342;ENSRNOG00000010645;ENSRNOG00000011140;ENSRNOG00000019374;ENSRNOG00000019675;ENSRNOG00000020845;ENSRNOG00000020849;ENSRNOG00000022071;ENSRNOG00000026653;ENSRNOG00000032596;…	0.0104161
GO:0001913	T cell mediated cytotoxicity	5	47	ENSRNOG00000000562;ENSRNOG00000000655;ENSRNOG00000000723;ENSRNOG00000032596;ENSRNOG00000050210	0.0106183
GO:0051258	protein polymerization	10	242	ENSRNOG00000000853;ENSRNOG00000006911;ENSRNOG00000007249;ENSRNOG00000013668;ENSRNOG00000014289;ENSRNOG00000016930;ENSRNOG00000019675;ENSRNOG00000019838;ENSRNOG00000025980;ENSRNOG00000047931	0.013323
GO:0022607	cellular component assembly	41	2422	ENSRNOG00000000562;ENSRNOG00000000571;ENSRNOG00000000851;ENSRNOG00000000853;ENSRNOG00000001420;ENSRNOG00000004526;ENSRNOG00000006911;ENSRNOG00000007249;ENSRNOG00000008533;ENSRNOG00000009683;ENSRNOG00000010037;ENSRNOG00000010319;ENSRNOG00000010420;ENSRNOG00000012957;ENSRNOG00000013668;ENSRNOG00000013683;ENSRNOG00000014288;ENSRNOG00000014289;ENSRNOG00000015945;ENSRNOG00000016930;ENSRNOG00000017354;…	0.013775
GO:0034341	response to interferon-gamma	7	116	ENSRNOG00000000451;ENSRNOG00000000853;ENSRNOG00000002568;ENSRNOG00000017354;ENSRNOG00000018087;ENSRNOG00000032708;ENSRNOG00000036701	0.0138345
GO:0048522	positive regulation of cellular process	65	4560	ENSRNOG00000000451;ENSRNOG00000000529;ENSRNOG00000000571;ENSRNOG00000000655;ENSRNOG00000000851;ENSRNOG00000000853;ENSRNOG00000000917;ENSRNOG00000001172;ENSRNOG00000001420;ENSRNOG00000002001;ENSRNOG00000002188;ENSRNOG00000002568;ENSRNOG00000002572;ENSRNOG00000002946;ENSRNOG00000007249;ENSRNOG00000007539;ENSRNOG00000007971;ENSRNOG00000008015;ENSRNOG00000008288;ENSRNOG00000008533;ENSRNOG00000008941;…	0.0139423
GO:0042493	response to drug	23	1048	ENSRNOG00000000571;ENSRNOG00000000853;ENSRNOG00000007249;ENSRNOG00000007971;ENSRNOG00000008015;ENSRNOG00000008941;ENSRNOG00000011557;ENSRNOG00000012183;ENSRNOG00000013009;ENSRNOG00000014205;ENSRNOG00000017751;ENSRNOG00000018087;ENSRNOG00000019568;ENSRNOG00000021201;ENSRNOG00000027767;ENSRNOG00000029886;ENSRNOG00000034254;ENSRNOG00000039980;ENSRNOG00000047098;ENSRNOG00000047321;ENSRNOG00000052802;…	0.0146192
GO:0065008	regulation of biological quality	51	3308	ENSRNOG00000000529;ENSRNOG00000000655;ENSRNOG00000000851;ENSRNOG00000000853;ENSRNOG00000001420;ENSRNOG00000002001;ENSRNOG00000002188;ENSRNOG00000004662;ENSRNOG00000006911;ENSRNOG00000008941;ENSRNOG00000009642;ENSRNOG00000010037;ENSRNOG00000011352;ENSRNOG00000012183;ENSRNOG00000012957;ENSRNOG00000013668;ENSRNOG00000013683;ENSRNOG00000014205;ENSRNOG00000014288;ENSRNOG00000014289;ENSRNOG00000014405;…	0.0146192
GO:0030041	actin filament polymerization	8	161	ENSRNOG00000000853;ENSRNOG00000006911;ENSRNOG00000013668;ENSRNOG00000014289;ENSRNOG00000019675;ENSRNOG00000019838;ENSRNOG00000025980;ENSRNOG00000047931	0.0146192
GO:0002250	adaptive immune response	12	357	ENSRNOG00000000562;ENSRNOG00000000655;ENSRNOG00000000723;ENSRNOG00000004737;ENSRNOG00000007539;ENSRNOG00000019374;ENSRNOG00000019675;ENSRNOG00000032596;ENSRNOG00000032708;ENSRNOG00000036674;ENSRNOG00000050000;ENSRNOG00000050210	0.0146192
GO:0010038	response to metalion	12	357	ENSRNOG00000002572;ENSRNOG00000007249;ENSRNOG00000008015;ENSRNOG00000011557;ENSRNOG00000017786;ENSRNOG00000019568;ENSRNOG00000021201;ENSRNOG00000027990;ENSRNOG00000036701;ENSRNOG00000038047;ENSRNOG00000042838;ENSRNOG00000056728	0.0146192
GO:0006950	response to stress	48	3090	ENSRNOG00000000451;ENSRNOG00000000562;ENSRNOG00000000571;ENSRNOG00000000655;ENSRNOG00000000851;ENSRNOG00000000853;ENSRNOG00000000917;ENSRNOG00000001420;ENSRNOG00000002188;ENSRNOG00000002568;ENSRNOG00000002946;ENSRNOG00000005825;ENSRNOG00000007249;ENSRNOG00000007539;ENSRNOG00000007763;ENSRNOG00000008015;ENSRNOG00000008061;ENSRNOG00000008288;ENSRNOG00000008941;ENSRNOG00000009342;ENSRNOG00000010420;…	0.019052
GO:0045184	establishment of protein localization	29	1526	ENSRNOG00000000851;ENSRNOG00000000853;ENSRNOG00000001420;ENSRNOG00000002001;ENSRNOG00000002568;ENSRNOG00000007539;ENSRNOG00000007971;ENSRNOG00000009342;ENSRNOG00000009642;ENSRNOG00000009888;ENSRNOG00000010319;ENSRNOG00000010420;ENSRNOG00000012183;ENSRNOG00000012957;ENSRNOG00000014288;ENSRNOG00000015945;ENSRNOG00000017074;ENSRNOG00000017751;ENSRNOG00000017941;ENSRNOG00000019090;ENSRNOG00000019374;…	0.0191737
GO:0006879	cellular iron ion homeostasis	5	58	ENSRNOG00000004662;ENSRNOG00000017235;ENSRNOG00000019768;ENSRNOG00000031540;ENSRNOG00000034150	0.0191737
GO:0043933	protein-containing complex subunit organization	31	1692	ENSRNOG00000000562;ENSRNOG00000000853;ENSRNOG00000001420;ENSRNOG00000004526;ENSRNOG00000006911;ENSRNOG00000007249;ENSRNOG00000008533;ENSRNOG00000010037;ENSRNOG00000010319;ENSRNOG00000010420;ENSRNOG00000013668;ENSRNOG00000014288;ENSRNOG00000014289;ENSRNOG00000015945;ENSRNOG00000016930;ENSRNOG00000019090;ENSRNOG00000019675;ENSRNOG00000019838;ENSRNOG00000020363;ENSRNOG00000025980;ENSRNOG00000026260;…	0.0201849
GO:0002456	T cell mediated immunity	6	93	ENSRNOG00000000562;ENSRNOG00000000655;ENSRNOG00000000723;ENSRNOG00000007539;ENSRNOG00000032596;ENSRNOG00000050210	0.0201849
GO:0046916	cellular transition metal ion homeostasis	6	93	ENSRNOG00000004662;ENSRNOG00000017235;ENSRNOG00000019768;ENSRNOG00000031540;ENSRNOG00000034150;ENSRNOG00000038047	0.0201849
GO:0002474	antigen processing and presentation of peptide antigen via MHC class I	4	33	ENSRNOG00000000723;ENSRNOG00000032596;ENSRNOG00000039744;ENSRNOG00000050210	0.0201849
GO:0031647	regulation of protein stability	9	224	ENSRNOG00000000529;ENSRNOG00000000851;ENSRNOG00000009642;ENSRNOG00000015703;ENSRNOG00000015857;ENSRNOG00000019090;ENSRNOG00000019675;ENSRNOG00000020845;ENSRNOG00000026260	0.0214793
GO:0034097	response to cytokine	18	756	ENSRNOG00000000451;ENSRNOG00000000655;ENSRNOG00000000853;ENSRNOG00000002568;ENSRNOG00000002572;ENSRNOG00000002946;ENSRNOG00000005872;ENSRNOG00000008015;ENSRNOG00000008941;ENSRNOG00000011054;ENSRNOG00000014205;ENSRNOG00000017354;ENSRNOG00000018087;ENSRNOG00000019568;ENSRNOG00000019675;ENSRNOG00000032708;ENSRNOG00000036701;ENSRNOG00000039980	0.0214793
GO:0050821	protein stabilization	7	135	ENSRNOG00000000529;ENSRNOG00000000851;ENSRNOG00000009642;ENSRNOG00000015703;ENSRNOG00000019090;ENSRNOG00000020845;ENSRNOG00000026260	0.0214793
GO:0071346	cellular response to interferon-gamma	6	96	ENSRNOG00000000853;ENSRNOG00000002568;ENSRNOG00000017354;ENSRNOG00000018087;ENSRNOG00000032708;ENSRNOG00000036701	0.0214793
GO:0001914	regulation of T cell mediated cytotoxicity	4	35	ENSRNOG00000000655;ENSRNOG00000000723;ENSRNOG00000032596;ENSRNOG00000050210	0.0224481
GO:0032880	regulation of protein localization	19	832	ENSRNOG00000000853;ENSRNOG00000001420;ENSRNOG00000002568;ENSRNOG00000007539;ENSRNOG00000009342;ENSRNOG00000009642;ENSRNOG00000010037;ENSRNOG00000010319;ENSRNOG00000010645;ENSRNOG00000012183;ENSRNOG00000012957;ENSRNOG00000014288;ENSRNOG00000019090;ENSRNOG00000019374;ENSRNOG00000019675;ENSRNOG00000020845;ENSRNOG00000026653;ENSRNOG00000034254;ENSRNOG00000049560	0.0224481
GO:0002821	positive regulation of adaptive immune response	6	98	ENSRNOG00000000723;ENSRNOG00000007539;ENSRNOG00000019675;ENSRNOG00000032596;ENSRNOG00000032708;ENSRNOG00000050210	0.0224481
GO:0002709	regulation of T cell mediated immunity	5	67	ENSRNOG00000000655;ENSRNOG00000000723;ENSRNOG00000007539;ENSRNOG00000032596;ENSRNOG00000050210	0.0281105
GO:0032271	regulation of protein polymerization	8	189	ENSRNOG00000006911;ENSRNOG00000007249;ENSRNOG00000013668;ENSRNOG00000014289;ENSRNOG00000019675;ENSRNOG00000019838;ENSRNOG00000025980;ENSRNOG00000047931	0.0282197
GO:0051179	localization	71	5340	ENSRNOG00000000562;ENSRNOG00000000571;ENSRNOG00000000655;ENSRNOG00000000851;ENSRNOG00000000853;ENSRNOG00000001420;ENSRNOG00000002001;ENSRNOG00000002568;ENSRNOG00000004526;ENSRNOG00000004662;ENSRNOG00000005809;ENSRNOG00000007249;ENSRNOG00000007539;ENSRNOG00000007784;ENSRNOG00000007971;ENSRNOG00000008533;ENSRNOG00000008941;ENSRNOG00000009342;ENSRNOG00000009642;ENSRNOG00000009683;ENSRNOG00000009888;…	0.0282777
GO:0002684	positive regulation of immune system process	19	854	ENSRNOG00000000451;ENSRNOG00000000655;ENSRNOG00000000723;ENSRNOG00000000851;ENSRNOG00000000853;ENSRNOG00000002568;ENSRNOG00000007539;ENSRNOG00000008015;ENSRNOG00000008941;ENSRNOG00000009342;ENSRNOG00000010645;ENSRNOG00000019374;ENSRNOG00000019675;ENSRNOG00000022071;ENSRNOG00000026653;ENSRNOG00000032596;ENSRNOG00000032708;ENSRNOG00000050000;ENSRNOG00000050210	0.0282777
GO:0030833	regulation of actin filament polymerization	7	146	ENSRNOG00000006911;ENSRNOG00000013668;ENSRNOG00000014289;ENSRNOG00000019675;ENSRNOG00000019838;ENSRNOG00000025980;ENSRNOG00000047931	0.0283755
GO:0098754	detoxification	6	105	ENSRNOG00000011140;ENSRNOG00000011557;ENSRNOG00000029886;ENSRNOG00000038047;ENSRNOG00000047098;ENSRNOG00000047321	0.0283755
GO:0008154	actin polymerization or depolymerization	8	192	ENSRNOG00000000853;ENSRNOG00000006911;ENSRNOG00000013668;ENSRNOG00000014289;ENSRNOG00000019675;ENSRNOG00000019838;ENSRNOG00000025980;ENSRNOG00000047931	0.0283755
GO:0009605	response to external stimulus	35	2097	ENSRNOG00000000529;ENSRNOG00000000562;ENSRNOG00000000655;ENSRNOG00000000853;ENSRNOG00000000917;ENSRNOG00000001420;ENSRNOG00000002188;ENSRNOG00000002946;ENSRNOG00000003895;ENSRNOG00000005825;ENSRNOG00000007249;ENSRNOG00000007539;ENSRNOG00000008015;ENSRNOG00000008288;ENSRNOG00000008941;ENSRNOG00000010645;ENSRNOG00000011557;ENSRNOG00000013009;ENSRNOG00000013683;ENSRNOG00000017354;ENSRNOG00000017786;…	0.0299936
GO:0070201	regulation of establishment of protein localization	15	597	ENSRNOG00000000853;ENSRNOG00000001420;ENSRNOG00000002568;ENSRNOG00000007539;ENSRNOG00000009342;ENSRNOG00000009642;ENSRNOG00000010319;ENSRNOG00000012183;ENSRNOG00000012957;ENSRNOG00000014288;ENSRNOG00000019090;ENSRNOG00000019374;ENSRNOG00000019675;ENSRNOG00000026653;ENSRNOG00000049560	0.0307443
GO:0010033	response to organic substance	43	2793	ENSRNOG00000000451;ENSRNOG00000000529;ENSRNOG00000000571;ENSRNOG00000000655;ENSRNOG00000000851;ENSRNOG00000000853;ENSRNOG00000001420;ENSRNOG00000002568;ENSRNOG00000002572;ENSRNOG00000002946;ENSRNOG00000005872;ENSRNOG00000007249;ENSRNOG00000007971;ENSRNOG00000008015;ENSRNOG00000008288;ENSRNOG00000008941;ENSRNOG00000009683;ENSRNOG00000011054;ENSRNOG00000011557;ENSRNOG00000012183;ENSRNOG00000012957;…	0.0329226
GO:0006457	protein folding	7	152	ENSRNOG00000009642;ENSRNOG00000012957;ENSRNOG00000018653;ENSRNOG00000019090;ENSRNOG00000019506;ENSRNOG00000026643;ENSRNOG00000051624	0.0329815
GO:1901700	response to oxygen-containing compound	28	1557	ENSRNOG00000000529;ENSRNOG00000000571;ENSRNOG00000000853;ENSRNOG00000001420;ENSRNOG00000002568;ENSRNOG00000002572;ENSRNOG00000002946;ENSRNOG00000007249;ENSRNOG00000007971;ENSRNOG00000008015;ENSRNOG00000008288;ENSRNOG00000008941;ENSRNOG00000011557;ENSRNOG00000012183;ENSRNOG00000013009;ENSRNOG00000014205;ENSRNOG00000014405;ENSRNOG00000018087;ENSRNOG00000019374;ENSRNOG00000019568;ENSRNOG00000019675;…	0.0348303
GO:1903039	positive regulation of leukocyte cell-cell adhesion	7	155	ENSRNOG00000000451;ENSRNOG00000000655;ENSRNOG00000000853;ENSRNOG00000002568;ENSRNOG00000008941;ENSRNOG00000019675;ENSRNOG00000032708	0.0348303
GO:0051248	negative regulation of protein metabolic process	20	955	ENSRNOG00000000655;ENSRNOG00000000851;ENSRNOG00000002568;ENSRNOG00000002946;ENSRNOG00000007249;ENSRNOG00000008533;ENSRNOG00000009683;ENSRNOG00000011352;ENSRNOG00000013862;ENSRNOG00000015857;ENSRNOG00000017359;ENSRNOG00000017751;ENSRNOG00000019374;ENSRNOG00000019675;ENSRNOG00000026260;ENSRNOG00000026643;ENSRNOG00000046699;ENSRNOG00000049497;ENSRNOG00000050108;ENSRNOG00000056728	0.0348303
GO:0044085	cellular component biogenesis	41	2642	ENSRNOG00000000562;ENSRNOG00000000571;ENSRNOG00000000851;ENSRNOG00000000853;ENSRNOG00000001420;ENSRNOG00000004526;ENSRNOG00000006911;ENSRNOG00000007249;ENSRNOG00000008533;ENSRNOG00000009683;ENSRNOG00000010037;ENSRNOG00000010319;ENSRNOG00000010420;ENSRNOG00000012957;ENSRNOG00000013668;ENSRNOG00000013683;ENSRNOG00000014288;ENSRNOG00000014289;ENSRNOG00000015945;ENSRNOG00000016930;ENSRNOG00000017354;…	0.0348303
GO:0002476	antigen processing and presentation of endogenous peptide antigen via MHC class Ib	3	19	ENSRNOG00000000723;ENSRNOG00000032596;ENSRNOG00000050210	0.0348303
GO:0002484	antigen processing and presentation of endogenous peptide antigen via MHC class I via ER pathway	3	19	ENSRNOG00000000723;ENSRNOG00000032596;ENSRNOG00000050210	0.0348303
GO:0002486	antigen processing and presentation of endogenous peptide antigen via MHC class I via ER pathway, TAP-independent	3	19	ENSRNOG00000000723;ENSRNOG00000032596;ENSRNOG00000050210	0.0348303
GO:0055076	transition metal ion homeostasis	6	114	ENSRNOG00000004662;ENSRNOG00000017235;ENSRNOG00000019768;ENSRNOG00000031540;ENSRNOG00000034150;ENSRNOG00000038047	0.035569
GO:0055072	iron ion homeostasis	5	76	ENSRNOG00000004662;ENSRNOG00000017235;ENSRNOG00000019768;ENSRNOG00000031540;ENSRNOG00000034150	0.0357743
GO:0002428	antigen processing and presentation of peptide antigen via MHC class Ib	3	20	ENSRNOG00000000723;ENSRNOG00000032596;ENSRNOG00000050210	0.038872
GO:0010941	regulation of cell death	25	1353	ENSRNOG00000000529;ENSRNOG00000000571;ENSRNOG00000000851;ENSRNOG00000000853;ENSRNOG00000001420;ENSRNOG00000002001;ENSRNOG00000002572;ENSRNOG00000002946;ENSRNOG00000007249;ENSRNOG00000008015;ENSRNOG00000010645;ENSRNOG00000011557;ENSRNOG00000012183;ENSRNOG00000012957;ENSRNOG00000013009;ENSRNOG00000015703;ENSRNOG00000015945;ENSRNOG00000017359;ENSRNOG00000017751;ENSRNOG00000019675;ENSRNOG00000021201;…	0.0416124
GO:0008064	regulation of actin polymerization or depolymerization	7	164	ENSRNOG00000006911;ENSRNOG00000013668;ENSRNOG00000014289;ENSRNOG00000019675;ENSRNOG00000019838;ENSRNOG00000025980;ENSRNOG00000047931	0.0420489
GO:0030832	regulation of actin filament length	7	164	ENSRNOG00000006911;ENSRNOG00000013668;ENSRNOG00000014289;ENSRNOG00000019675;ENSRNOG00000019838;ENSRNOG00000025980;ENSRNOG00000047931	0.0420489
GO:0030097	hemopoiesis	15	636	ENSRNOG00000000451;ENSRNOG00000000529;ENSRNOG00000000655;ENSRNOG00000002568;ENSRNOG00000005872;ENSRNOG00000007539;ENSRNOG00000008015;ENSRNOG00000008941;ENSRNOG00000011140;ENSRNOG00000014205;ENSRNOG00000020845;ENSRNOG00000032708;ENSRNOG00000042838;ENSRNOG00000049497;ENSRNOG00000056728	0.0453079
GO:0051128	regulation of cellular component organization	34	2098	ENSRNOG00000000655;ENSRNOG00000001420;ENSRNOG00000002001;ENSRNOG00000005809;ENSRNOG00000006911;ENSRNOG00000007249;ENSRNOG00000007971;ENSRNOG00000008941;ENSRNOG00000009642;ENSRNOG00000009683;ENSRNOG00000010037;ENSRNOG00000010319;ENSRNOG00000010645;ENSRNOG00000012957;ENSRNOG00000013668;ENSRNOG00000013683;ENSRNOG00000014288;ENSRNOG00000014289;ENSRNOG00000017359;ENSRNOG00000017941;ENSRNOG00000018087;…	0.0462163
GO:0045087	innate immune response	14	576	ENSRNOG00000000451;ENSRNOG00000000853;ENSRNOG00000002568;ENSRNOG00000007539;ENSRNOG00000008288;ENSRNOG00000009342;ENSRNOG00000010645;ENSRNOG00000011557;ENSRNOG00000017354;ENSRNOG00000018087;ENSRNOG00000019675;ENSRNOG00000032708;ENSRNOG00000036701;ENSRNOG00000050000	0.0478665
GO:0001906	cell killing	6	124	ENSRNOG00000000562;ENSRNOG00000000655;ENSRNOG00000000723;ENSRNOG00000005825;ENSRNOG00000032596;ENSRNOG00000050210	0.0478665
GO:0051187	cofactor catabolic process	4	49	ENSRNOG00000010580;ENSRNOG00000029886;ENSRNOG00000047098;ENSRNOG00000047321	0.0478665
GO:0009894	regulation of catabolic process	16	712	ENSRNOG00000000851;ENSRNOG00000007249;ENSRNOG00000008533;ENSRNOG00000009683;ENSRNOG00000011352;ENSRNOG00000012957;ENSRNOG00000015857;ENSRNOG00000017941;ENSRNOG00000018087;ENSRNOG00000019506;ENSRNOG00000019675;ENSRNOG00000026260;ENSRNOG00000026653;ENSRNOG00000049497;ENSRNOG00000050108;ENSRNOG00000050585	0.0478665
GO:0007010	cytoskeleton organization	22	1148	ENSRNOG00000000853;ENSRNOG00000005809;ENSRNOG00000006911;ENSRNOG00000007249;ENSRNOG00000009683;ENSRNOG00000010037;ENSRNOG00000010319;ENSRNOG00000013668;ENSRNOG00000013683;ENSRNOG00000014289;ENSRNOG00000015496;ENSRNOG00000017354;ENSRNOG00000017786;ENSRNOG00000018087;ENSRNOG00000019675;ENSRNOG00000019838;ENSRNOG00000025980;ENSRNOG00000026643;ENSRNOG00000034254;ENSRNOG00000036701;ENSRNOG00000047931;…	0.0480036

## Sheet: liver
Significantly (FDR < 0.05) enriched biological process (BP) terms for known genes identified in liver under various heat stress conditions. Green-colored cells represent the GO terms common to all the three organs (consensus heat-stress response [HSR]); grey-colored cells contain terms common to two comparisons (common HSR); and the remaining cells are color-coded by comparisons (red = CT vs. H30…
GO ID	Description	CT vs. H30				CT vs. H60				CT vs. H120
		Out (323)	All (17705)	Genes ID	FDR	Out (492)	All (17705)	Genes ID	FDR	Out (271)	All (17705)	Genes ID	FDR
GO:0001889	liver development	7	153	ENSRNOG00000003253;ENSRNOG00000003515;ENSRNOG00000013304;ENSRNOG00000015335;ENSRNOG00000021027;ENSRNOG00000021097;ENSRNOG00000050761	0.0132527	34	153	ENSRNOG00000000185;ENSRNOG00000000314;ENSRNOG00000000841;ENSRNOG00000000847;ENSRNOG00000000967;ENSRNOG00000001926;ENSRNOG00000003253;ENSRNOG00000003515;ENSRNOG00000004332;ENSRNOG00000005276;ENSRNOG00000005513;ENSRNOG00000007390;ENSRNOG00000007395;ENSRNOG00000009845;ENSRNOG00000010189;ENSRNOG00000010746;ENSRNOG00000012473;ENSRNOG00000013360;ENSRNOG00000014117;ENSRNOG00000016552;ENSRNOG00000016967;…	3.82694e-06	29	153	ENSRNOG00000000967;ENSRNOG00000001926;ENSRNOG00000002292;ENSRNOG00000004281;ENSRNOG00000004741;ENSRNOG00000005276;ENSRNOG00000005513;ENSRNOG00000007395;ENSRNOG00000008095;ENSRNOG00000008837;ENSRNOG00000009845;ENSRNOG00000010746;ENSRNOG00000013704;ENSRNOG00000014117;ENSRNOG00000015439;ENSRNOG00000016552;ENSRNOG00000016967;ENSRNOG00000017976;ENSRNOG00000018740;ENSRNOG00000019113;ENSRNOG00000020578;…	8.05496e-06
GO:0006066	alcohol metabolic process	12	245	ENSRNOG00000002342;ENSRNOG00000003253;ENSRNOG00000003515;ENSRNOG00000005542;ENSRNOG00000006787;ENSRNOG00000009550;ENSRNOG00000012436;ENSRNOG00000015455;ENSRNOG00000015736;ENSRNOG00000016791;ENSRNOG00000020989;ENSRNOG00000050445	0.000352972	48	245	ENSRNOG00000000411;ENSRNOG00000002115;ENSRNOG00000002342;ENSRNOG00000002478;ENSRNOG00000003253;ENSRNOG00000003500;ENSRNOG00000003515;ENSRNOG00000004649;ENSRNOG00000005542;ENSRNOG00000006859;ENSRNOG00000006997;ENSRNOG00000008364;ENSRNOG00000009094;ENSRNOG00000009488;ENSRNOG00000009550;ENSRNOG00000010034;ENSRNOG00000010482;ENSRNOG00000012436;ENSRNOG00000012911;ENSRNOG00000013004;ENSRNOG00000013376;…	7.63055e-07	48	245	ENSRNOG00000001967;ENSRNOG00000002342;ENSRNOG00000002478;ENSRNOG00000002826;ENSRNOG00000004601;ENSRNOG00000005542;ENSRNOG00000006787;ENSRNOG00000006859;ENSRNOG00000008074;ENSRNOG00000008364;ENSRNOG00000009094;ENSRNOG00000009488;ENSRNOG00000009550;ENSRNOG00000009734;ENSRNOG00000009799;ENSRNOG00000009946;ENSRNOG00000011039;ENSRNOG00000011613;ENSRNOG00000012123;ENSRNOG00000012436;ENSRNOG00000012911;…	4.93998e-10
GO:0006081	cellular aldehyde metabolic process	7	63	ENSRNOG00000002342;ENSRNOG00000005861;ENSRNOG00000012436;ENSRNOG00000012794;ENSRNOG00000023150;ENSRNOG00000023856;ENSRNOG00000050585	0.000272813	17	63	ENSRNOG00000002342;ENSRNOG00000012436;ENSRNOG00000014806;ENSRNOG00000014907;ENSRNOG00000015290;ENSRNOG00000016064;ENSRNOG00000016727;ENSRNOG00000017821;ENSRNOG00000018289;ENSRNOG00000019458;ENSRNOG00000023150;ENSRNOG00000046493;ENSRNOG00000050585;ENSRNOG00000052802;ENSRNOG00000054770;ENSRNOG00000056728;ENSRNOG00000057626	0.00029363	19	63	ENSRNOG00000002342;ENSRNOG00000005861;ENSRNOG00000009734;ENSRNOG00000012436;ENSRNOG00000012794;ENSRNOG00000013949;ENSRNOG00000014806;ENSRNOG00000014907;ENSRNOG00000016064;ENSRNOG00000016727;ENSRNOG00000017523;ENSRNOG00000017821;ENSRNOG00000019458;ENSRNOG00000023150;ENSRNOG00000046493;ENSRNOG00000050585;ENSRNOG00000052802;ENSRNOG00000056728;ENSRNOG00000057626	6.55844e-07
GO:0006082	organic acid metabolic process	28	851	ENSRNOG00000001517;ENSRNOG00000003253;ENSRNOG00000003763;ENSRNOG00000006807;ENSRNOG00000007069;ENSRNOG00000010539;ENSRNOG00000011351;ENSRNOG00000011573;ENSRNOG00000012436;ENSRNOG00000012794;ENSRNOG00000013304;ENSRNOG00000013409;ENSRNOG00000015072;ENSRNOG00000018404;ENSRNOG00000018522;ENSRNOG00000018755;ENSRNOG00000019626;ENSRNOG00000020081;ENSRNOG00000020202;ENSRNOG00000023150;ENSRNOG00000023856;…	1.21778e-06	181	851	ENSRNOG00000000185;ENSRNOG00000000658;ENSRNOG00000000867;ENSRNOG00000000967;ENSRNOG00000001142;ENSRNOG00000001177;ENSRNOG00000001391;ENSRNOG00000001889;ENSRNOG00000002358;ENSRNOG00000002393;ENSRNOG00000002478;ENSRNOG00000002609;ENSRNOG00000002636;ENSRNOG00000002642;ENSRNOG00000002643;ENSRNOG00000002991;ENSRNOG00000003163;ENSRNOG00000003223;ENSRNOG00000003228;ENSRNOG00000003253;ENSRNOG00000003709;…	4.6987e-31	167	851	ENSRNOG00000000158;ENSRNOG00000000582;ENSRNOG00000000658;ENSRNOG00000000903;ENSRNOG00000000967;ENSRNOG00000001142;ENSRNOG00000001391;ENSRNOG00000001823;ENSRNOG00000001967;ENSRNOG00000001973;ENSRNOG00000002358;ENSRNOG00000002393;ENSRNOG00000002478;ENSRNOG00000002636;ENSRNOG00000002642;ENSRNOG00000002701;ENSRNOG00000003228;ENSRNOG00000003728;ENSRNOG00000004377;ENSRNOG00000004601;ENSRNOG00000005266;…	8.49845e-37
GO:0006091	generation of precursor metabolites and energy	14	400	ENSRNOG00000002218;ENSRNOG00000005668;ENSRNOG00000006807;ENSRNOG00000012436;ENSRNOG00000012550;ENSRNOG00000019626;ENSRNOG00000023150;ENSRNOG00000023387;ENSRNOG00000029971;ENSRNOG00000031033;ENSRNOG00000031053;ENSRNOG00000036692;ENSRNOG00000049394;ENSRNOG00000050585	0.00100862	90	400	ENSRNOG00000001269;ENSRNOG00000002642;ENSRNOG00000003163;ENSRNOG00000004206;ENSRNOG00000004553;ENSRNOG00000005418;ENSRNOG00000005668;ENSRNOG00000005686;ENSRNOG00000005698;ENSRNOG00000006388;ENSRNOG00000006589;ENSRNOG00000006779;ENSRNOG00000006807;ENSRNOG00000006939;ENSRNOG00000007407;ENSRNOG00000007784;ENSRNOG00000007895;ENSRNOG00000008047;ENSRNOG00000008364;ENSRNOG00000008755;ENSRNOG00000009063;…	1.75354e-16	60	400	ENSRNOG00000000610;ENSRNOG00000001269;ENSRNOG00000001890;ENSRNOG00000002642;ENSRNOG00000003302;ENSRNOG00000004553;ENSRNOG00000005668;ENSRNOG00000006388;ENSRNOG00000006589;ENSRNOG00000006779;ENSRNOG00000007081;ENSRNOG00000007784;ENSRNOG00000007895;ENSRNOG00000008047;ENSRNOG00000008079;ENSRNOG00000008103;ENSRNOG00000008364;ENSRNOG00000008755;ENSRNOG00000009088;ENSRNOG00000009615;ENSRNOG00000009845;…	7.36277e-08
GO:0006163	purine nucleotide metabolic process	15	440	ENSRNOG00000001517;ENSRNOG00000005668;ENSRNOG00000006807;ENSRNOG00000007946;ENSRNOG00000012550;ENSRNOG00000015320;ENSRNOG00000018755;ENSRNOG00000023150;ENSRNOG00000023387;ENSRNOG00000029971;ENSRNOG00000031033;ENSRNOG00000031053;ENSRNOG00000046889;ENSRNOG00000049394;ENSRNOG00000050585	0.000744426	94	440	ENSRNOG00000000064;ENSRNOG00000000658;ENSRNOG00000002186;ENSRNOG00000002671;ENSRNOG00000002693;ENSRNOG00000002928;ENSRNOG00000003163;ENSRNOG00000003626;ENSRNOG00000004172;ENSRNOG00000005668;ENSRNOG00000005686;ENSRNOG00000006331;ENSRNOG00000006589;ENSRNOG00000006779;ENSRNOG00000006807;ENSRNOG00000006939;ENSRNOG00000006947;ENSRNOG00000007235;ENSRNOG00000007395;ENSRNOG00000007407;ENSRNOG00000007895;…	9.79244e-16	68	440	ENSRNOG00000000064;ENSRNOG00000000658;ENSRNOG00000001314;ENSRNOG00000001967;ENSRNOG00000002186;ENSRNOG00000003302;ENSRNOG00000005668;ENSRNOG00000006589;ENSRNOG00000006779;ENSRNOG00000006947;ENSRNOG00000007235;ENSRNOG00000007395;ENSRNOG00000007895;ENSRNOG00000008572;ENSRNOG00000008798;ENSRNOG00000009094;ENSRNOG00000009565;ENSRNOG00000009994;ENSRNOG00000010558;ENSRNOG00000010580;ENSRNOG00000010633;…	1.70924e-09
GO:0006520	cellular amino acid metabolic process	11	251	ENSRNOG00000003253;ENSRNOG00000003763;ENSRNOG00000007069;ENSRNOG00000011351;ENSRNOG00000011573;ENSRNOG00000013304;ENSRNOG00000013409;ENSRNOG00000018404;ENSRNOG00000020202;ENSRNOG00000023856;ENSRNOG00000061876	0.0010824	52	251	ENSRNOG00000000185;ENSRNOG00000000867;ENSRNOG00000001391;ENSRNOG00000001889;ENSRNOG00000002393;ENSRNOG00000002609;ENSRNOG00000002636;ENSRNOG00000002991;ENSRNOG00000003253;ENSRNOG00000003709;ENSRNOG00000003763;ENSRNOG00000005795;ENSRNOG00000006302;ENSRNOG00000006508;ENSRNOG00000007069;ENSRNOG00000007213;ENSRNOG00000007395;ENSRNOG00000008553;ENSRNOG00000008643;ENSRNOG00000008798;ENSRNOG00000011052;…	3.48509e-08	48	251	ENSRNOG00000000158;ENSRNOG00000000582;ENSRNOG00000000903;ENSRNOG00000001391;ENSRNOG00000002393;ENSRNOG00000002636;ENSRNOG00000002701;ENSRNOG00000005266;ENSRNOG00000005275;ENSRNOG00000006302;ENSRNOG00000007395;ENSRNOG00000007763;ENSRNOG00000008643;ENSRNOG00000008798;ENSRNOG00000008837;ENSRNOG00000009878;ENSRNOG00000010262;ENSRNOG00000011052;ENSRNOG00000011189;ENSRNOG00000011200;ENSRNOG00000011599;…	1.04653e-09
GO:0006629	lipid metabolic process	25	1070	ENSRNOG00000001517;ENSRNOG00000002342;ENSRNOG00000002896;ENSRNOG00000005542;ENSRNOG00000005861;ENSRNOG00000006787;ENSRNOG00000009550;ENSRNOG00000010539;ENSRNOG00000011330;ENSRNOG00000011523;ENSRNOG00000012436;ENSRNOG00000015072;ENSRNOG00000015736;ENSRNOG00000016791;ENSRNOG00000018522;ENSRNOG00000018755;ENSRNOG00000019626;ENSRNOG00000020989;ENSRNOG00000025602;ENSRNOG00000028368;ENSRNOG00000031312;…	0.000744426	168	1070	ENSRNOG00000000068;ENSRNOG00000000177;ENSRNOG00000000411;ENSRNOG00000000571;ENSRNOG00000000658;ENSRNOG00000000815;ENSRNOG00000000967;ENSRNOG00000001142;ENSRNOG00000001177;ENSRNOG00000001189;ENSRNOG00000001385;ENSRNOG00000001889;ENSRNOG00000002115;ENSRNOG00000002212;ENSRNOG00000002342;ENSRNOG00000002358;ENSRNOG00000002478;ENSRNOG00000002642;ENSRNOG00000002755;ENSRNOG00000003223;ENSRNOG00000003228;…	1.64899e-14	153	1070	ENSRNOG00000000068;ENSRNOG00000000658;ENSRNOG00000000967;ENSRNOG00000001142;ENSRNOG00000001967;ENSRNOG00000002050;ENSRNOG00000002342;ENSRNOG00000002358;ENSRNOG00000002478;ENSRNOG00000002642;ENSRNOG00000002826;ENSRNOG00000003228;ENSRNOG00000004089;ENSRNOG00000004377;ENSRNOG00000004464;ENSRNOG00000004601;ENSRNOG00000005360;ENSRNOG00000005542;ENSRNOG00000005861;ENSRNOG00000006779;ENSRNOG00000006787;…	9.42651e-19
GO:0006631	fatty acid metabolic process	10	292	ENSRNOG00000001517;ENSRNOG00000010539;ENSRNOG00000015072;ENSRNOG00000018522;ENSRNOG00000018755;ENSRNOG00000019626;ENSRNOG00000031312;ENSRNOG00000046889;ENSRNOG00000047565;ENSRNOG00000061499	0.00974792	79	292	ENSRNOG00000000658;ENSRNOG00000000967;ENSRNOG00000001142;ENSRNOG00000001177;ENSRNOG00000002478;ENSRNOG00000002642;ENSRNOG00000003223;ENSRNOG00000003228;ENSRNOG00000004172;ENSRNOG00000004377;ENSRNOG00000004649;ENSRNOG00000006331;ENSRNOG00000006508;ENSRNOG00000006675;ENSRNOG00000006779;ENSRNOG00000007395;ENSRNOG00000008245;ENSRNOG00000008320;ENSRNOG00000008377;ENSRNOG00000008474;ENSRNOG00000008755;…	2.4457e-19	70	292	ENSRNOG00000000658;ENSRNOG00000000967;ENSRNOG00000001142;ENSRNOG00000002478;ENSRNOG00000002642;ENSRNOG00000003228;ENSRNOG00000004377;ENSRNOG00000004601;ENSRNOG00000006779;ENSRNOG00000007395;ENSRNOG00000008245;ENSRNOG00000008320;ENSRNOG00000008377;ENSRNOG00000008474;ENSRNOG00000008755;ENSRNOG00000008988;ENSRNOG00000009488;ENSRNOG00000009565;ENSRNOG00000009615;ENSRNOG00000009630;ENSRNOG00000009845;…	1.46169e-19
GO:0006694	steroid biosynthetic process	7	116	ENSRNOG00000005542;ENSRNOG00000005861;ENSRNOG00000006787;ENSRNOG00000009550;ENSRNOG00000019626;ENSRNOG00000020989;ENSRNOG00000046889	0.00351239	23	116	ENSRNOG00000002115;ENSRNOG00000002478;ENSRNOG00000004649;ENSRNOG00000005542;ENSRNOG00000007395;ENSRNOG00000009488;ENSRNOG00000009550;ENSRNOG00000010034;ENSRNOG00000010128;ENSRNOG00000012911;ENSRNOG00000013004;ENSRNOG00000013376;ENSRNOG00000016552;ENSRNOG00000017188;ENSRNOG00000020035;ENSRNOG00000020696;ENSRNOG00000020776;ENSRNOG00000020853;ENSRNOG00000021808;ENSRNOG00000030019;ENSRNOG00000046889;…	0.00155137	30	116	ENSRNOG00000002050;ENSRNOG00000002478;ENSRNOG00000002826;ENSRNOG00000005542;ENSRNOG00000005861;ENSRNOG00000006787;ENSRNOG00000007395;ENSRNOG00000008074;ENSRNOG00000009488;ENSRNOG00000009550;ENSRNOG00000009630;ENSRNOG00000010128;ENSRNOG00000012911;ENSRNOG00000013004;ENSRNOG00000013376;ENSRNOG00000013763;ENSRNOG00000016122;ENSRNOG00000016552;ENSRNOG00000017188;ENSRNOG00000019422;ENSRNOG00000019626;…	3.77116e-09
GO:0006721	terpenoid metabolic process	4	56	ENSRNOG00000002342;ENSRNOG00000011330;ENSRNOG00000012436;ENSRNOG00000015736	0.0347056	14	56	ENSRNOG00000002342;ENSRNOG00000002358;ENSRNOG00000004332;ENSRNOG00000012436;ENSRNOG00000012458;ENSRNOG00000013794;ENSRNOG00000014907;ENSRNOG00000015736;ENSRNOG00000016275;ENSRNOG00000016552;ENSRNOG00000024705;ENSRNOG00000031004;ENSRNOG00000054770;ENSRNOG00000055295	0.00297516	10	56	ENSRNOG00000002342;ENSRNOG00000002358;ENSRNOG00000009734;ENSRNOG00000012436;ENSRNOG00000012458;ENSRNOG00000013794;ENSRNOG00000014907;ENSRNOG00000015518;ENSRNOG00000016122;ENSRNOG00000016552	0.0365247
GO:0006732	coenzyme metabolic process	12	312	ENSRNOG00000001517;ENSRNOG00000003253;ENSRNOG00000005861;ENSRNOG00000006807;ENSRNOG00000011351;ENSRNOG00000015455;ENSRNOG00000018755;ENSRNOG00000023150;ENSRNOG00000046889;ENSRNOG00000047023;ENSRNOG00000050315;ENSRNOG00000050585	0.00140425	71	312	ENSRNOG00000000658;ENSRNOG00000001889;ENSRNOG00000003253;ENSRNOG00000003709;ENSRNOG00000004172;ENSRNOG00000004740;ENSRNOG00000005686;ENSRNOG00000006302;ENSRNOG00000006331;ENSRNOG00000006589;ENSRNOG00000006779;ENSRNOG00000006807;ENSRNOG00000006947;ENSRNOG00000007395;ENSRNOG00000007895;ENSRNOG00000008553;ENSRNOG00000008572;ENSRNOG00000008798;ENSRNOG00000009565;ENSRNOG00000009715;ENSRNOG00000009982;…	3.53797e-13	63	312	ENSRNOG00000000658;ENSRNOG00000003177;ENSRNOG00000005275;ENSRNOG00000005861;ENSRNOG00000006302;ENSRNOG00000006589;ENSRNOG00000006779;ENSRNOG00000006947;ENSRNOG00000007395;ENSRNOG00000007895;ENSRNOG00000008103;ENSRNOG00000008572;ENSRNOG00000008798;ENSRNOG00000009565;ENSRNOG00000009715;ENSRNOG00000009994;ENSRNOG00000010580;ENSRNOG00000010633;ENSRNOG00000011039;ENSRNOG00000011612;ENSRNOG00000013376;…	8.2907e-14
GO:0006739	NADP metabolic process	3	26	ENSRNOG00000005861;ENSRNOG00000050315;ENSRNOG00000050585	0.0347056	8	26	ENSRNOG00000009715;ENSRNOG00000019458;ENSRNOG00000034191;ENSRNOG00000050315;ENSRNOG00000050585;ENSRNOG00000056728;ENSRNOG00000057626;ENSRNOG00000061527	0.0132174	9	26	ENSRNOG00000005861;ENSRNOG00000009715;ENSRNOG00000013949;ENSRNOG00000017523;ENSRNOG00000019458;ENSRNOG00000022576;ENSRNOG00000050585;ENSRNOG00000056728;ENSRNOG00000057626	0.000697853
GO:0006753	nucleoside phosphate metabolic process	17	552	ENSRNOG00000001517;ENSRNOG00000005668;ENSRNOG00000005861;ENSRNOG00000006807;ENSRNOG00000007946;ENSRNOG00000012550;ENSRNOG00000015320;ENSRNOG00000018755;ENSRNOG00000023150;ENSRNOG00000023387;ENSRNOG00000029971;ENSRNOG00000031033;ENSRNOG00000031053;ENSRNOG00000046889;ENSRNOG00000049394;ENSRNOG00000050315;ENSRNOG00000050585	0.000744426	114	552	ENSRNOG00000000064;ENSRNOG00000000658;ENSRNOG00000000815;ENSRNOG00000001797;ENSRNOG00000002186;ENSRNOG00000002671;ENSRNOG00000002693;ENSRNOG00000002928;ENSRNOG00000003163;ENSRNOG00000003626;ENSRNOG00000003709;ENSRNOG00000004172;ENSRNOG00000004883;ENSRNOG00000005668;ENSRNOG00000005686;ENSRNOG00000006331;ENSRNOG00000006589;ENSRNOG00000006779;ENSRNOG00000006807;ENSRNOG00000006939;ENSRNOG00000006947;…	5.34719e-18	87	552	ENSRNOG00000000064;ENSRNOG00000000658;ENSRNOG00000001314;ENSRNOG00000001797;ENSRNOG00000001967;ENSRNOG00000002186;ENSRNOG00000003302;ENSRNOG00000005668;ENSRNOG00000005861;ENSRNOG00000006589;ENSRNOG00000006779;ENSRNOG00000006947;ENSRNOG00000007235;ENSRNOG00000007395;ENSRNOG00000007570;ENSRNOG00000007895;ENSRNOG00000008103;ENSRNOG00000008572;ENSRNOG00000008798;ENSRNOG00000009094;ENSRNOG00000009565;…	1.23987e-12
GO:0008152	metabolic process	123	10478	ENSRNOG00000000184;ENSRNOG00000000443;ENSRNOG00000000527;ENSRNOG00000000557;ENSRNOG00000000799;ENSRNOG00000001517;ENSRNOG00000002218;ENSRNOG00000002342;ENSRNOG00000002520;ENSRNOG00000002896;ENSRNOG00000003253;ENSRNOG00000003515;ENSRNOG00000003763;ENSRNOG00000003809;ENSRNOG00000003975;ENSRNOG00000004196;ENSRNOG00000004813;ENSRNOG00000005256;ENSRNOG00000005542;ENSRNOG00000005668;ENSRNOG00000005763;…	0.000199829	1109	10478	ENSRNOG00000000053;ENSRNOG00000000064;ENSRNOG00000000068;ENSRNOG00000000150;ENSRNOG00000000164;ENSRNOG00000000165;ENSRNOG00000000172;ENSRNOG00000000177;ENSRNOG00000000185;ENSRNOG00000000186;ENSRNOG00000000314;ENSRNOG00000000322;ENSRNOG00000000397;ENSRNOG00000000411;ENSRNOG00000000461;ENSRNOG00000000467;ENSRNOG00000000488;ENSRNOG00000000520;ENSRNOG00000000521;ENSRNOG00000000527;ENSRNOG00000000557;…	8.64112e-42	864	10478	ENSRNOG00000000048;ENSRNOG00000000053;ENSRNOG00000000064;ENSRNOG00000000068;ENSRNOG00000000150;ENSRNOG00000000158;ENSRNOG00000000164;ENSRNOG00000000165;ENSRNOG00000000186;ENSRNOG00000000397;ENSRNOG00000000422;ENSRNOG00000000438;ENSRNOG00000000461;ENSRNOG00000000520;ENSRNOG00000000521;ENSRNOG00000000527;ENSRNOG00000000582;ENSRNOG00000000604;ENSRNOG00000000610;ENSRNOG00000000658;ENSRNOG00000000796;…	2.79089e-30
GO:0008610	lipid biosynthetic process	13	458	ENSRNOG00000005542;ENSRNOG00000005861;ENSRNOG00000006787;ENSRNOG00000009550;ENSRNOG00000010539;ENSRNOG00000016791;ENSRNOG00000018755;ENSRNOG00000019626;ENSRNOG00000020989;ENSRNOG00000025602;ENSRNOG00000028368;ENSRNOG00000046889;ENSRNOG00000061499	0.00845832	83	458	ENSRNOG00000000411;ENSRNOG00000000658;ENSRNOG00000001142;ENSRNOG00000001189;ENSRNOG00000002115;ENSRNOG00000002212;ENSRNOG00000002478;ENSRNOG00000002642;ENSRNOG00000003223;ENSRNOG00000003228;ENSRNOG00000003500;ENSRNOG00000004377;ENSRNOG00000004649;ENSRNOG00000005360;ENSRNOG00000005542;ENSRNOG00000006331;ENSRNOG00000006508;ENSRNOG00000007395;ENSRNOG00000008167;ENSRNOG00000008245;ENSRNOG00000008377;…	6.06145e-10	82	458	ENSRNOG00000000658;ENSRNOG00000001142;ENSRNOG00000002050;ENSRNOG00000002478;ENSRNOG00000002642;ENSRNOG00000002826;ENSRNOG00000003228;ENSRNOG00000004377;ENSRNOG00000005360;ENSRNOG00000005542;ENSRNOG00000005861;ENSRNOG00000006787;ENSRNOG00000007395;ENSRNOG00000008074;ENSRNOG00000008167;ENSRNOG00000008245;ENSRNOG00000008377;ENSRNOG00000009488;ENSRNOG00000009550;ENSRNOG00000009565;ENSRNOG00000009615;…	6.47751e-15
GO:0009058	biosynthetic process	67	5265	ENSRNOG00000000184;ENSRNOG00000000799;ENSRNOG00000001517;ENSRNOG00000002520;ENSRNOG00000003253;ENSRNOG00000003515;ENSRNOG00000003975;ENSRNOG00000004196;ENSRNOG00000005256;ENSRNOG00000005542;ENSRNOG00000005861;ENSRNOG00000006756;ENSRNOG00000006787;ENSRNOG00000006807;ENSRNOG00000007336;ENSRNOG00000007946;ENSRNOG00000009297;ENSRNOG00000009550;ENSRNOG00000010390;ENSRNOG00000010539;ENSRNOG00000011351;…	0.0148344	540	5265	ENSRNOG00000000053;ENSRNOG00000000064;ENSRNOG00000000150;ENSRNOG00000000185;ENSRNOG00000000322;ENSRNOG00000000397;ENSRNOG00000000411;ENSRNOG00000000461;ENSRNOG00000000467;ENSRNOG00000000488;ENSRNOG00000000521;ENSRNOG00000000604;ENSRNOG00000000658;ENSRNOG00000000796;ENSRNOG00000000799;ENSRNOG00000000808;ENSRNOG00000000815;ENSRNOG00000000841;ENSRNOG00000000853;ENSRNOG00000000867;ENSRNOG00000000909;…	2.20292e-08	410	5265	ENSRNOG00000000053;ENSRNOG00000000064;ENSRNOG00000000150;ENSRNOG00000000158;ENSRNOG00000000397;ENSRNOG00000000461;ENSRNOG00000000521;ENSRNOG00000000604;ENSRNOG00000000658;ENSRNOG00000000796;ENSRNOG00000000799;ENSRNOG00000000903;ENSRNOG00000001030;ENSRNOG00000001050;ENSRNOG00000001106;ENSRNOG00000001142;ENSRNOG00000001239;ENSRNOG00000001647;ENSRNOG00000001653;ENSRNOG00000001738;ENSRNOG00000001797;…	9.74985e-05
GO:0009063	cellular amino acid catabolic process	8	88	ENSRNOG00000003253;ENSRNOG00000007069;ENSRNOG00000011351;ENSRNOG00000011573;ENSRNOG00000013304;ENSRNOG00000020202;ENSRNOG00000023856;ENSRNOG00000061876	0.000242072	18	88	ENSRNOG00000001391;ENSRNOG00000002636;ENSRNOG00000003253;ENSRNOG00000003709;ENSRNOG00000006508;ENSRNOG00000007069;ENSRNOG00000008798;ENSRNOG00000011599;ENSRNOG00000011684;ENSRNOG00000011861;ENSRNOG00000013223;ENSRNOG00000016348;ENSRNOG00000017821;ENSRNOG00000019485;ENSRNOG00000029993;ENSRNOG00000031263;ENSRNOG00000057578;ENSRNOG00000061876	0.00504256	21	88	ENSRNOG00000000158;ENSRNOG00000000582;ENSRNOG00000001391;ENSRNOG00000002636;ENSRNOG00000002701;ENSRNOG00000005266;ENSRNOG00000005275;ENSRNOG00000008798;ENSRNOG00000010262;ENSRNOG00000011599;ENSRNOG00000011612;ENSRNOG00000013223;ENSRNOG00000017752;ENSRNOG00000017777;ENSRNOG00000017821;ENSRNOG00000019485;ENSRNOG00000029993;ENSRNOG00000039494;ENSRNOG00000050214;ENSRNOG00000057578;ENSRNOG00000061876	7.70164e-06
GO:0009108	coenzyme biosynthetic process	8	201	ENSRNOG00000001517;ENSRNOG00000003253;ENSRNOG00000006807;ENSRNOG00000011351;ENSRNOG00000015455;ENSRNOG00000018755;ENSRNOG00000023150;ENSRNOG00000050585	0.0132527	43	201	ENSRNOG00000000658;ENSRNOG00000003253;ENSRNOG00000003709;ENSRNOG00000004172;ENSRNOG00000004740;ENSRNOG00000006331;ENSRNOG00000006589;ENSRNOG00000006807;ENSRNOG00000006947;ENSRNOG00000007895;ENSRNOG00000008572;ENSRNOG00000009565;ENSRNOG00000009982;ENSRNOG00000010580;ENSRNOG00000013520;ENSRNOG00000014522;ENSRNOG00000015290;ENSRNOG00000015455;ENSRNOG00000016190;ENSRNOG00000016727;ENSRNOG00000016924;…	3.26814e-07	33	201	ENSRNOG00000000658;ENSRNOG00000003177;ENSRNOG00000006589;ENSRNOG00000006947;ENSRNOG00000007895;ENSRNOG00000008572;ENSRNOG00000009565;ENSRNOG00000009994;ENSRNOG00000010580;ENSRNOG00000010633;ENSRNOG00000011039;ENSRNOG00000013949;ENSRNOG00000014522;ENSRNOG00000016190;ENSRNOG00000016727;ENSRNOG00000016924;ENSRNOG00000018755;ENSRNOG00000019180;ENSRNOG00000019742;ENSRNOG00000019918;ENSRNOG00000020420;…	3.18615e-05
GO:0009117	nucleotide metabolic process	17	545	ENSRNOG00000001517;ENSRNOG00000005668;ENSRNOG00000005861;ENSRNOG00000006807;ENSRNOG00000007946;ENSRNOG00000012550;ENSRNOG00000015320;ENSRNOG00000018755;ENSRNOG00000023150;ENSRNOG00000023387;ENSRNOG00000029971;ENSRNOG00000031033;ENSRNOG00000031053;ENSRNOG00000046889;ENSRNOG00000049394;ENSRNOG00000050315;ENSRNOG00000050585	0.000691104	113	545	ENSRNOG00000000064;ENSRNOG00000000658;ENSRNOG00000001797;ENSRNOG00000002186;ENSRNOG00000002671;ENSRNOG00000002693;ENSRNOG00000002928;ENSRNOG00000003163;ENSRNOG00000003626;ENSRNOG00000003709;ENSRNOG00000004172;ENSRNOG00000004883;ENSRNOG00000005668;ENSRNOG00000005686;ENSRNOG00000006331;ENSRNOG00000006589;ENSRNOG00000006779;ENSRNOG00000006807;ENSRNOG00000006939;ENSRNOG00000006947;ENSRNOG00000007235;…	5.48462e-18	87	545	ENSRNOG00000000064;ENSRNOG00000000658;ENSRNOG00000001314;ENSRNOG00000001797;ENSRNOG00000001967;ENSRNOG00000002186;ENSRNOG00000003302;ENSRNOG00000005668;ENSRNOG00000005861;ENSRNOG00000006589;ENSRNOG00000006779;ENSRNOG00000006947;ENSRNOG00000007235;ENSRNOG00000007395;ENSRNOG00000007570;ENSRNOG00000007895;ENSRNOG00000008103;ENSRNOG00000008572;ENSRNOG00000008798;ENSRNOG00000009094;ENSRNOG00000009565;…	6.10448e-13
GO:0009123	nucleoside monophosphate metabolic process	12	311	ENSRNOG00000005668;ENSRNOG00000006807;ENSRNOG00000007946;ENSRNOG00000012550;ENSRNOG00000015320;ENSRNOG00000023150;ENSRNOG00000023387;ENSRNOG00000029971;ENSRNOG00000031033;ENSRNOG00000031053;ENSRNOG00000049394;ENSRNOG00000050585	0.00138844	66	311	ENSRNOG00000000064;ENSRNOG00000001797;ENSRNOG00000002186;ENSRNOG00000002928;ENSRNOG00000003163;ENSRNOG00000003626;ENSRNOG00000005668;ENSRNOG00000006589;ENSRNOG00000006807;ENSRNOG00000006939;ENSRNOG00000007235;ENSRNOG00000007407;ENSRNOG00000009063;ENSRNOG00000009094;ENSRNOG00000009364;ENSRNOG00000010452;ENSRNOG00000010558;ENSRNOG00000012325;ENSRNOG00000012550;ENSRNOG00000013331;ENSRNOG00000013791;…	7.88731e-11	37	311	ENSRNOG00000000064;ENSRNOG00000001314;ENSRNOG00000001797;ENSRNOG00000002186;ENSRNOG00000003302;ENSRNOG00000005668;ENSRNOG00000006589;ENSRNOG00000007235;ENSRNOG00000009094;ENSRNOG00000010558;ENSRNOG00000011849;ENSRNOG00000012325;ENSRNOG00000013791;ENSRNOG00000014625;ENSRNOG00000015320;ENSRNOG00000016190;ENSRNOG00000016470;ENSRNOG00000018397;ENSRNOG00000019742;ENSRNOG00000020420;ENSRNOG00000023150;…	0.00536816
GO:0009126	purine nucleoside monophosphate metabolic process	12	279	ENSRNOG00000005668;ENSRNOG00000006807;ENSRNOG00000007946;ENSRNOG00000012550;ENSRNOG00000015320;ENSRNOG00000023150;ENSRNOG00000023387;ENSRNOG00000029971;ENSRNOG00000031033;ENSRNOG00000031053;ENSRNOG00000049394;ENSRNOG00000050585	0.000691104	63	279	ENSRNOG00000000064;ENSRNOG00000002186;ENSRNOG00000002928;ENSRNOG00000003163;ENSRNOG00000003626;ENSRNOG00000005668;ENSRNOG00000006589;ENSRNOG00000006807;ENSRNOG00000006939;ENSRNOG00000007235;ENSRNOG00000007407;ENSRNOG00000009063;ENSRNOG00000009094;ENSRNOG00000009364;ENSRNOG00000010452;ENSRNOG00000010558;ENSRNOG00000012325;ENSRNOG00000012550;ENSRNOG00000013331;ENSRNOG00000013791;ENSRNOG00000014078;…	1.62926e-11	35	279	ENSRNOG00000000064;ENSRNOG00000001314;ENSRNOG00000002186;ENSRNOG00000003302;ENSRNOG00000005668;ENSRNOG00000006589;ENSRNOG00000007235;ENSRNOG00000009094;ENSRNOG00000010558;ENSRNOG00000011849;ENSRNOG00000012325;ENSRNOG00000013791;ENSRNOG00000014625;ENSRNOG00000015320;ENSRNOG00000016190;ENSRNOG00000016470;ENSRNOG00000019742;ENSRNOG00000020420;ENSRNOG00000023150;ENSRNOG00000023587;ENSRNOG00000030237;…	0.00300217
GO:0009141	nucleoside triphosphate metabolic process	12	295	ENSRNOG00000005668;ENSRNOG00000006807;ENSRNOG00000007946;ENSRNOG00000012550;ENSRNOG00000015320;ENSRNOG00000023150;ENSRNOG00000023387;ENSRNOG00000029971;ENSRNOG00000031033;ENSRNOG00000031053;ENSRNOG00000049394;ENSRNOG00000050585	0.000984038	65	295	ENSRNOG00000000064;ENSRNOG00000000815;ENSRNOG00000002671;ENSRNOG00000002693;ENSRNOG00000002928;ENSRNOG00000003163;ENSRNOG00000003626;ENSRNOG00000005668;ENSRNOG00000006589;ENSRNOG00000006807;ENSRNOG00000006939;ENSRNOG00000007235;ENSRNOG00000007407;ENSRNOG00000009063;ENSRNOG00000009364;ENSRNOG00000010452;ENSRNOG00000010558;ENSRNOG00000012325;ENSRNOG00000012550;ENSRNOG00000013331;ENSRNOG00000013791;…	2.05405e-11	32	295	ENSRNOG00000000064;ENSRNOG00000001314;ENSRNOG00000003302;ENSRNOG00000005668;ENSRNOG00000006589;ENSRNOG00000007235;ENSRNOG00000010558;ENSRNOG00000011849;ENSRNOG00000012325;ENSRNOG00000013791;ENSRNOG00000014625;ENSRNOG00000015320;ENSRNOG00000016190;ENSRNOG00000016470;ENSRNOG00000019742;ENSRNOG00000020420;ENSRNOG00000021233;ENSRNOG00000023150;ENSRNOG00000023587;ENSRNOG00000030237;ENSRNOG00000032134;…	0.0362269
GO:0009144	purine nucleoside triphosphate metabolic process	12	275	ENSRNOG00000005668;ENSRNOG00000006807;ENSRNOG00000007946;ENSRNOG00000012550;ENSRNOG00000015320;ENSRNOG00000023150;ENSRNOG00000023387;ENSRNOG00000029971;ENSRNOG00000031033;ENSRNOG00000031053;ENSRNOG00000049394;ENSRNOG00000050585	0.000687234	63	275	ENSRNOG00000000064;ENSRNOG00000002671;ENSRNOG00000002693;ENSRNOG00000002928;ENSRNOG00000003163;ENSRNOG00000003626;ENSRNOG00000005668;ENSRNOG00000006589;ENSRNOG00000006807;ENSRNOG00000006939;ENSRNOG00000007235;ENSRNOG00000007407;ENSRNOG00000009063;ENSRNOG00000009364;ENSRNOG00000010452;ENSRNOG00000010558;ENSRNOG00000012325;ENSRNOG00000012550;ENSRNOG00000013331;ENSRNOG00000013791;ENSRNOG00000014078;…	9.18307e-12	32	275	ENSRNOG00000000064;ENSRNOG00000001314;ENSRNOG00000003302;ENSRNOG00000005668;ENSRNOG00000006589;ENSRNOG00000007235;ENSRNOG00000010558;ENSRNOG00000011849;ENSRNOG00000012325;ENSRNOG00000013791;ENSRNOG00000014625;ENSRNOG00000015320;ENSRNOG00000016190;ENSRNOG00000016470;ENSRNOG00000019742;ENSRNOG00000020420;ENSRNOG00000021233;ENSRNOG00000023150;ENSRNOG00000023587;ENSRNOG00000030237;ENSRNOG00000032134;…	0.0151098
GO:0009150	purine ribonucleotide metabolic process	15	419	ENSRNOG00000001517;ENSRNOG00000005668;ENSRNOG00000006807;ENSRNOG00000007946;ENSRNOG00000012550;ENSRNOG00000015320;ENSRNOG00000018755;ENSRNOG00000023150;ENSRNOG00000023387;ENSRNOG00000029971;ENSRNOG00000031033;ENSRNOG00000031053;ENSRNOG00000046889;ENSRNOG00000049394;ENSRNOG00000050585	0.000587268	94	419	ENSRNOG00000000064;ENSRNOG00000000658;ENSRNOG00000002186;ENSRNOG00000002671;ENSRNOG00000002693;ENSRNOG00000002928;ENSRNOG00000003163;ENSRNOG00000003626;ENSRNOG00000004172;ENSRNOG00000005668;ENSRNOG00000005686;ENSRNOG00000006331;ENSRNOG00000006589;ENSRNOG00000006779;ENSRNOG00000006807;ENSRNOG00000006939;ENSRNOG00000006947;ENSRNOG00000007235;ENSRNOG00000007395;ENSRNOG00000007407;ENSRNOG00000007895;…	3.76475e-17	68	419	ENSRNOG00000000064;ENSRNOG00000000658;ENSRNOG00000001314;ENSRNOG00000001967;ENSRNOG00000002186;ENSRNOG00000003302;ENSRNOG00000005668;ENSRNOG00000006589;ENSRNOG00000006779;ENSRNOG00000006947;ENSRNOG00000007235;ENSRNOG00000007395;ENSRNOG00000007895;ENSRNOG00000008572;ENSRNOG00000008798;ENSRNOG00000009094;ENSRNOG00000009565;ENSRNOG00000009994;ENSRNOG00000010558;ENSRNOG00000010580;ENSRNOG00000010633;…	2.26627e-10
GO:0009161	ribonucleoside monophosphate metabolic process	12	290	ENSRNOG00000005668;ENSRNOG00000006807;ENSRNOG00000007946;ENSRNOG00000012550;ENSRNOG00000015320;ENSRNOG00000023150;ENSRNOG00000023387;ENSRNOG00000029971;ENSRNOG00000031033;ENSRNOG00000031053;ENSRNOG00000049394;ENSRNOG00000050585	0.000850425	64	290	ENSRNOG00000000064;ENSRNOG00000001797;ENSRNOG00000002186;ENSRNOG00000002928;ENSRNOG00000003163;ENSRNOG00000003626;ENSRNOG00000005668;ENSRNOG00000006589;ENSRNOG00000006807;ENSRNOG00000006939;ENSRNOG00000007235;ENSRNOG00000007407;ENSRNOG00000009063;ENSRNOG00000009094;ENSRNOG00000009364;ENSRNOG00000010452;ENSRNOG00000010558;ENSRNOG00000012325;ENSRNOG00000012550;ENSRNOG00000013331;ENSRNOG00000013791;…	2.8301e-11	36	290	ENSRNOG00000000064;ENSRNOG00000001314;ENSRNOG00000001797;ENSRNOG00000002186;ENSRNOG00000003302;ENSRNOG00000005668;ENSRNOG00000006589;ENSRNOG00000007235;ENSRNOG00000009094;ENSRNOG00000010558;ENSRNOG00000011849;ENSRNOG00000012325;ENSRNOG00000013791;ENSRNOG00000014625;ENSRNOG00000015320;ENSRNOG00000016190;ENSRNOG00000016470;ENSRNOG00000019742;ENSRNOG00000020420;ENSRNOG00000023150;ENSRNOG00000023587;…	0.00300217
GO:0009167	purine ribonucleoside monophosphate metabolic process	12	278	ENSRNOG00000005668;ENSRNOG00000006807;ENSRNOG00000007946;ENSRNOG00000012550;ENSRNOG00000015320;ENSRNOG00000023150;ENSRNOG00000023387;ENSRNOG00000029971;ENSRNOG00000031033;ENSRNOG00000031053;ENSRNOG00000049394;ENSRNOG00000050585	0.000691104	63	278	ENSRNOG00000000064;ENSRNOG00000002186;ENSRNOG00000002928;ENSRNOG00000003163;ENSRNOG00000003626;ENSRNOG00000005668;ENSRNOG00000006589;ENSRNOG00000006807;ENSRNOG00000006939;ENSRNOG00000007235;ENSRNOG00000007407;ENSRNOG00000009063;ENSRNOG00000009094;ENSRNOG00000009364;ENSRNOG00000010452;ENSRNOG00000010558;ENSRNOG00000012325;ENSRNOG00000012550;ENSRNOG00000013331;ENSRNOG00000013791;ENSRNOG00000014078;…	1.52402e-11	35	278	ENSRNOG00000000064;ENSRNOG00000001314;ENSRNOG00000002186;ENSRNOG00000003302;ENSRNOG00000005668;ENSRNOG00000006589;ENSRNOG00000007235;ENSRNOG00000009094;ENSRNOG00000010558;ENSRNOG00000011849;ENSRNOG00000012325;ENSRNOG00000013791;ENSRNOG00000014625;ENSRNOG00000015320;ENSRNOG00000016190;ENSRNOG00000016470;ENSRNOG00000019742;ENSRNOG00000020420;ENSRNOG00000023150;ENSRNOG00000023587;ENSRNOG00000030237;…	0.00282209
GO:0009199	ribonucleoside triphosphate metabolic process	12	274	ENSRNOG00000005668;ENSRNOG00000006807;ENSRNOG00000007946;ENSRNOG00000012550;ENSRNOG00000015320;ENSRNOG00000023150;ENSRNOG00000023387;ENSRNOG00000029971;ENSRNOG00000031033;ENSRNOG00000031053;ENSRNOG00000049394;ENSRNOG00000050585	0.000685978	62	274	ENSRNOG00000000064;ENSRNOG00000002671;ENSRNOG00000002693;ENSRNOG00000002928;ENSRNOG00000003163;ENSRNOG00000003626;ENSRNOG00000005668;ENSRNOG00000006589;ENSRNOG00000006807;ENSRNOG00000006939;ENSRNOG00000007235;ENSRNOG00000007407;ENSRNOG00000009063;ENSRNOG00000009364;ENSRNOG00000010452;ENSRNOG00000010558;ENSRNOG00000012550;ENSRNOG00000013331;ENSRNOG00000013791;ENSRNOG00000014078;ENSRNOG00000014338;…	2.10549e-11	31	274	ENSRNOG00000000064;ENSRNOG00000001314;ENSRNOG00000003302;ENSRNOG00000005668;ENSRNOG00000006589;ENSRNOG00000007235;ENSRNOG00000010558;ENSRNOG00000011849;ENSRNOG00000013791;ENSRNOG00000014625;ENSRNOG00000015320;ENSRNOG00000016190;ENSRNOG00000016470;ENSRNOG00000019742;ENSRNOG00000020420;ENSRNOG00000021233;ENSRNOG00000023150;ENSRNOG00000023587;ENSRNOG00000030237;ENSRNOG00000032134;ENSRNOG00000034242;…	0.0243242
GO:0009205	purine ribonucleoside triphosphate metabolic process	12	268	ENSRNOG00000005668;ENSRNOG00000006807;ENSRNOG00000007946;ENSRNOG00000012550;ENSRNOG00000015320;ENSRNOG00000023150;ENSRNOG00000023387;ENSRNOG00000029971;ENSRNOG00000031033;ENSRNOG00000031053;ENSRNOG00000049394;ENSRNOG00000050585	0.000587268	62	268	ENSRNOG00000000064;ENSRNOG00000002671;ENSRNOG00000002693;ENSRNOG00000002928;ENSRNOG00000003163;ENSRNOG00000003626;ENSRNOG00000005668;ENSRNOG00000006589;ENSRNOG00000006807;ENSRNOG00000006939;ENSRNOG00000007235;ENSRNOG00000007407;ENSRNOG00000009063;ENSRNOG00000009364;ENSRNOG00000010452;ENSRNOG00000010558;ENSRNOG00000012550;ENSRNOG00000013331;ENSRNOG00000013791;ENSRNOG00000014078;ENSRNOG00000014338;…	9.18307e-12	31	268	ENSRNOG00000000064;ENSRNOG00000001314;ENSRNOG00000003302;ENSRNOG00000005668;ENSRNOG00000006589;ENSRNOG00000007235;ENSRNOG00000010558;ENSRNOG00000011849;ENSRNOG00000013791;ENSRNOG00000014625;ENSRNOG00000015320;ENSRNOG00000016190;ENSRNOG00000016470;ENSRNOG00000019742;ENSRNOG00000020420;ENSRNOG00000021233;ENSRNOG00000023150;ENSRNOG00000023587;ENSRNOG00000030237;ENSRNOG00000032134;ENSRNOG00000034242;…	0.018339
GO:0009259	ribonucleotide metabolic process	15	433	ENSRNOG00000001517;ENSRNOG00000005668;ENSRNOG00000006807;ENSRNOG00000007946;ENSRNOG00000012550;ENSRNOG00000015320;ENSRNOG00000018755;ENSRNOG00000023150;ENSRNOG00000023387;ENSRNOG00000029971;ENSRNOG00000031033;ENSRNOG00000031053;ENSRNOG00000046889;ENSRNOG00000049394;ENSRNOG00000050585	0.000691104	95	433	ENSRNOG00000000064;ENSRNOG00000000658;ENSRNOG00000001797;ENSRNOG00000002186;ENSRNOG00000002671;ENSRNOG00000002693;ENSRNOG00000002928;ENSRNOG00000003163;ENSRNOG00000003626;ENSRNOG00000004172;ENSRNOG00000005668;ENSRNOG00000005686;ENSRNOG00000006331;ENSRNOG00000006589;ENSRNOG00000006779;ENSRNOG00000006807;ENSRNOG00000006939;ENSRNOG00000006947;ENSRNOG00000007235;ENSRNOG00000007395;ENSRNOG00000007407;…	1.15582e-16	70	433	ENSRNOG00000000064;ENSRNOG00000000658;ENSRNOG00000001314;ENSRNOG00000001797;ENSRNOG00000001967;ENSRNOG00000002186;ENSRNOG00000003302;ENSRNOG00000005668;ENSRNOG00000006589;ENSRNOG00000006779;ENSRNOG00000006947;ENSRNOG00000007235;ENSRNOG00000007395;ENSRNOG00000007895;ENSRNOG00000008572;ENSRNOG00000008798;ENSRNOG00000009094;ENSRNOG00000009565;ENSRNOG00000009994;ENSRNOG00000010558;ENSRNOG00000010580;…	1.32922e-10
GO:0009725	response to hormone	20	939	ENSRNOG00000003253;ENSRNOG00000003515;ENSRNOG00000005542;ENSRNOG00000005861;ENSRNOG00000006787;ENSRNOG00000007946;ENSRNOG00000008414;ENSRNOG00000012436;ENSRNOG00000013304;ENSRNOG00000013409;ENSRNOG00000013439;ENSRNOG00000015320;ENSRNOG00000015654;ENSRNOG00000023150;ENSRNOG00000023856;ENSRNOG00000025602;ENSRNOG00000030625;ENSRNOG00000036692;ENSRNOG00000059947;ENSRNOG00000061499	0.00925896	140	939	ENSRNOG00000000053;ENSRNOG00000000165;ENSRNOG00000000521;ENSRNOG00000000847;ENSRNOG00000000853;ENSRNOG00000000967;ENSRNOG00000000989;ENSRNOG00000001007;ENSRNOG00000001436;ENSRNOG00000001585;ENSRNOG00000001926;ENSRNOG00000002393;ENSRNOG00000002478;ENSRNOG00000002572;ENSRNOG00000002642;ENSRNOG00000002671;ENSRNOG00000002693;ENSRNOG00000003253;ENSRNOG00000003500;ENSRNOG00000003515;ENSRNOG00000003977;…	2.56969e-10	110	939	ENSRNOG00000000053;ENSRNOG00000000158;ENSRNOG00000000165;ENSRNOG00000000521;ENSRNOG00000000967;ENSRNOG00000001007;ENSRNOG00000001436;ENSRNOG00000001926;ENSRNOG00000002050;ENSRNOG00000002292;ENSRNOG00000002393;ENSRNOG00000002478;ENSRNOG00000002572;ENSRNOG00000002642;ENSRNOG00000002946;ENSRNOG00000003977;ENSRNOG00000004060;ENSRNOG00000004072;ENSRNOG00000004284;ENSRNOG00000004377;ENSRNOG00000004466;…	5.66175e-08
GO:0010038	response to metal ion	10	357	ENSRNOG00000003253;ENSRNOG00000007946;ENSRNOG00000008414;ENSRNOG00000012053;ENSRNOG00000013304;ENSRNOG00000016133;ENSRNOG00000023150;ENSRNOG00000025602;ENSRNOG00000030625;ENSRNOG00000059947	0.0331793	56	357	ENSRNOG00000000053;ENSRNOG00000001926;ENSRNOG00000002115;ENSRNOG00000002251;ENSRNOG00000002572;ENSRNOG00000002636;ENSRNOG00000003253;ENSRNOG00000003977;ENSRNOG00000004332;ENSRNOG00000006302;ENSRNOG00000006997;ENSRNOG00000007041;ENSRNOG00000008012;ENSRNOG00000008015;ENSRNOG00000008047;ENSRNOG00000008364;ENSRNOG00000008414;ENSRNOG00000010452;ENSRNOG00000010558;ENSRNOG00000010984;ENSRNOG00000012053;…	8.14039e-05	49	357	ENSRNOG00000000053;ENSRNOG00000001926;ENSRNOG00000002251;ENSRNOG00000002292;ENSRNOG00000002572;ENSRNOG00000002636;ENSRNOG00000003977;ENSRNOG00000004294;ENSRNOG00000005849;ENSRNOG00000006302;ENSRNOG00000007089;ENSRNOG00000008012;ENSRNOG00000008047;ENSRNOG00000008364;ENSRNOG00000008837;ENSRNOG00000009882;ENSRNOG00000010558;ENSRNOG00000010984;ENSRNOG00000012772;ENSRNOG00000013704;ENSRNOG00000014117;…	2.30431e-05
GO:0010288	response to lead ion	4	31	ENSRNOG00000003253;ENSRNOG00000007946;ENSRNOG00000025602;ENSRNOG00000030625	0.00602442	9	31	ENSRNOG00000000053;ENSRNOG00000001926;ENSRNOG00000003253;ENSRNOG00000006997;ENSRNOG00000008364;ENSRNOG00000012840;ENSRNOG00000015206;ENSRNOG00000025443;ENSRNOG00000025602	0.0107567	7	31	ENSRNOG00000000053;ENSRNOG00000001926;ENSRNOG00000008364;ENSRNOG00000015206;ENSRNOG00000016907;ENSRNOG00000025443;ENSRNOG00000025602	0.0392162
GO:0014070	response to organic cyclic compound	18	953	ENSRNOG00000003515;ENSRNOG00000005542;ENSRNOG00000005861;ENSRNOG00000007946;ENSRNOG00000008414;ENSRNOG00000012436;ENSRNOG00000013304;ENSRNOG00000013409;ENSRNOG00000013439;ENSRNOG00000015320;ENSRNOG00000015654;ENSRNOG00000016791;ENSRNOG00000023150;ENSRNOG00000023856;ENSRNOG00000025602;ENSRNOG00000030625;ENSRNOG00000059947;ENSRNOG00000061499	0.046122	139	953	ENSRNOG00000000053;ENSRNOG00000000165;ENSRNOG00000000521;ENSRNOG00000000604;ENSRNOG00000000658;ENSRNOG00000000847;ENSRNOG00000000853;ENSRNOG00000000967;ENSRNOG00000000989;ENSRNOG00000001148;ENSRNOG00000001420;ENSRNOG00000001585;ENSRNOG00000001889;ENSRNOG00000001926;ENSRNOG00000002115;ENSRNOG00000002636;ENSRNOG00000002642;ENSRNOG00000002693;ENSRNOG00000002735;ENSRNOG00000002818;ENSRNOG00000002991;…	1.36462e-09	112	953	ENSRNOG00000000053;ENSRNOG00000000158;ENSRNOG00000000165;ENSRNOG00000000521;ENSRNOG00000000604;ENSRNOG00000000658;ENSRNOG00000000967;ENSRNOG00000001926;ENSRNOG00000002050;ENSRNOG00000002292;ENSRNOG00000002341;ENSRNOG00000002636;ENSRNOG00000002642;ENSRNOG00000002735;ENSRNOG00000002818;ENSRNOG00000003977;ENSRNOG00000004060;ENSRNOG00000004294;ENSRNOG00000004466;ENSRNOG00000004537;ENSRNOG00000005275;…	3.34919e-08
GO:0015980	energy derivation by oxidation of organic compounds	9	221	ENSRNOG00000002218;ENSRNOG00000005668;ENSRNOG00000012550;ENSRNOG00000023387;ENSRNOG00000029971;ENSRNOG00000031033;ENSRNOG00000031053;ENSRNOG00000036692;ENSRNOG00000049394	0.00642124	58	221	ENSRNOG00000001269;ENSRNOG00000002642;ENSRNOG00000003163;ENSRNOG00000004553;ENSRNOG00000005418;ENSRNOG00000005668;ENSRNOG00000005686;ENSRNOG00000005698;ENSRNOG00000006388;ENSRNOG00000006939;ENSRNOG00000007407;ENSRNOG00000007784;ENSRNOG00000007895;ENSRNOG00000008047;ENSRNOG00000008364;ENSRNOG00000009063;ENSRNOG00000009364;ENSRNOG00000009615;ENSRNOG00000009845;ENSRNOG00000010452;ENSRNOG00000011474;…	1.85495e-13	39	221	ENSRNOG00000000610;ENSRNOG00000001269;ENSRNOG00000002642;ENSRNOG00000003302;ENSRNOG00000004553;ENSRNOG00000005668;ENSRNOG00000006388;ENSRNOG00000007784;ENSRNOG00000007895;ENSRNOG00000008047;ENSRNOG00000008079;ENSRNOG00000008103;ENSRNOG00000008364;ENSRNOG00000009615;ENSRNOG00000009845;ENSRNOG00000009994;ENSRNOG00000011849;ENSRNOG00000013949;ENSRNOG00000013963;ENSRNOG00000014625;ENSRNOG00000016190;…	6.54173e-07
GO:0016054	organic acid catabolic process	12	191	ENSRNOG00000003253;ENSRNOG00000007069;ENSRNOG00000011351;ENSRNOG00000011573;ENSRNOG00000013304;ENSRNOG00000018522;ENSRNOG00000020202;ENSRNOG00000023856;ENSRNOG00000046889;ENSRNOG00000047023;ENSRNOG00000047565;ENSRNOG00000061876	5.37303e-05	50	191	ENSRNOG00000000658;ENSRNOG00000001177;ENSRNOG00000001391;ENSRNOG00000002636;ENSRNOG00000003253;ENSRNOG00000003709;ENSRNOG00000004377;ENSRNOG00000006460;ENSRNOG00000006508;ENSRNOG00000006675;ENSRNOG00000006779;ENSRNOG00000007069;ENSRNOG00000008474;ENSRNOG00000008755;ENSRNOG00000008798;ENSRNOG00000009615;ENSRNOG00000009845;ENSRNOG00000010128;ENSRNOG00000011599;ENSRNOG00000011622;ENSRNOG00000011684;…	1.55522e-11	49	191	ENSRNOG00000000158;ENSRNOG00000000582;ENSRNOG00000000658;ENSRNOG00000001391;ENSRNOG00000002636;ENSRNOG00000002701;ENSRNOG00000004377;ENSRNOG00000004601;ENSRNOG00000005266;ENSRNOG00000005275;ENSRNOG00000006779;ENSRNOG00000008474;ENSRNOG00000008755;ENSRNOG00000008798;ENSRNOG00000009615;ENSRNOG00000009845;ENSRNOG00000010128;ENSRNOG00000010262;ENSRNOG00000011599;ENSRNOG00000011612;ENSRNOG00000011622;…	8.98316e-15
GO:0016126	sterol biosynthetic process	4	41	ENSRNOG00000005542;ENSRNOG00000006787;ENSRNOG00000009550;ENSRNOG00000020989	0.013517	13	41	ENSRNOG00000002115;ENSRNOG00000002478;ENSRNOG00000005542;ENSRNOG00000009488;ENSRNOG00000009550;ENSRNOG00000012911;ENSRNOG00000013376;ENSRNOG00000016552;ENSRNOG00000020696;ENSRNOG00000020776;ENSRNOG00000020853;ENSRNOG00000054549;ENSRNOG00000056728	0.000447347	19	41	ENSRNOG00000002478;ENSRNOG00000002826;ENSRNOG00000005542;ENSRNOG00000006787;ENSRNOG00000009488;ENSRNOG00000009550;ENSRNOG00000012911;ENSRNOG00000013376;ENSRNOG00000013763;ENSRNOG00000016122;ENSRNOG00000016552;ENSRNOG00000020696;ENSRNOG00000020853;ENSRNOG00000020989;ENSRNOG00000032297;ENSRNOG00000049604;ENSRNOG00000054549;ENSRNOG00000056728;ENSRNOG00000057814	2.13731e-10
GO:0017144	drug metabolic process	24	649	ENSRNOG00000002342;ENSRNOG00000002896;ENSRNOG00000003253;ENSRNOG00000003763;ENSRNOG00000003809;ENSRNOG00000005668;ENSRNOG00000006807;ENSRNOG00000007946;ENSRNOG00000011351;ENSRNOG00000012436;ENSRNOG00000012550;ENSRNOG00000013439;ENSRNOG00000015320;ENSRNOG00000015455;ENSRNOG00000018755;ENSRNOG00000019626;ENSRNOG00000023150;ENSRNOG00000023387;ENSRNOG00000023856;ENSRNOG00000029971;ENSRNOG00000031033;…	1.74534e-06	138	649	ENSRNOG00000000053;ENSRNOG00000000064;ENSRNOG00000000185;ENSRNOG00000000853;ENSRNOG00000001889;ENSRNOG00000001964;ENSRNOG00000002115;ENSRNOG00000002342;ENSRNOG00000002636;ENSRNOG00000002928;ENSRNOG00000002991;ENSRNOG00000003163;ENSRNOG00000003253;ENSRNOG00000003626;ENSRNOG00000003709;ENSRNOG00000003763;ENSRNOG00000003809;ENSRNOG00000004332;ENSRNOG00000004649;ENSRNOG00000004740;ENSRNOG00000005668;…	3.38277e-23	95	649	ENSRNOG00000000053;ENSRNOG00000000064;ENSRNOG00000001314;ENSRNOG00000001823;ENSRNOG00000001967;ENSRNOG00000002342;ENSRNOG00000002636;ENSRNOG00000002701;ENSRNOG00000003177;ENSRNOG00000003302;ENSRNOG00000003809;ENSRNOG00000004601;ENSRNOG00000005275;ENSRNOG00000005668;ENSRNOG00000005849;ENSRNOG00000006589;ENSRNOG00000007235;ENSRNOG00000007395;ENSRNOG00000007895;ENSRNOG00000008103;ENSRNOG00000008364;…	6.51722e-12
GO:0019637	organophosphate metabolic process	21	907	ENSRNOG00000001517;ENSRNOG00000002896;ENSRNOG00000005668;ENSRNOG00000005861;ENSRNOG00000006807;ENSRNOG00000007946;ENSRNOG00000012550;ENSRNOG00000015320;ENSRNOG00000016791;ENSRNOG00000018755;ENSRNOG00000023150;ENSRNOG00000023387;ENSRNOG00000028368;ENSRNOG00000029971;ENSRNOG00000031033;ENSRNOG00000031053;ENSRNOG00000046889;ENSRNOG00000049394;ENSRNOG00000050315;ENSRNOG00000050445;ENSRNOG00000050585	0.0028935	146	907	ENSRNOG00000000064;ENSRNOG00000000165;ENSRNOG00000000177;ENSRNOG00000000411;ENSRNOG00000000658;ENSRNOG00000000815;ENSRNOG00000001797;ENSRNOG00000002186;ENSRNOG00000002671;ENSRNOG00000002693;ENSRNOG00000002928;ENSRNOG00000003163;ENSRNOG00000003500;ENSRNOG00000003626;ENSRNOG00000003709;ENSRNOG00000004172;ENSRNOG00000004883;ENSRNOG00000005668;ENSRNOG00000005686;ENSRNOG00000006331;ENSRNOG00000006388;…	2.42799e-13	119	907	ENSRNOG00000000064;ENSRNOG00000000165;ENSRNOG00000000658;ENSRNOG00000001314;ENSRNOG00000001797;ENSRNOG00000001967;ENSRNOG00000002186;ENSRNOG00000003302;ENSRNOG00000004089;ENSRNOG00000005668;ENSRNOG00000005861;ENSRNOG00000006388;ENSRNOG00000006589;ENSRNOG00000006779;ENSRNOG00000006947;ENSRNOG00000007235;ENSRNOG00000007395;ENSRNOG00000007422;ENSRNOG00000007496;ENSRNOG00000007570;ENSRNOG00000007895;…	9.82385e-12
GO:0019693	ribose phosphate metabolic process	16	448	ENSRNOG00000001517;ENSRNOG00000005668;ENSRNOG00000005861;ENSRNOG00000006807;ENSRNOG00000007946;ENSRNOG00000012550;ENSRNOG00000015320;ENSRNOG00000018755;ENSRNOG00000023150;ENSRNOG00000023387;ENSRNOG00000029971;ENSRNOG00000031033;ENSRNOG00000031053;ENSRNOG00000046889;ENSRNOG00000049394;ENSRNOG00000050585	0.000384794	99	448	ENSRNOG00000000064;ENSRNOG00000000658;ENSRNOG00000001797;ENSRNOG00000002186;ENSRNOG00000002671;ENSRNOG00000002693;ENSRNOG00000002928;ENSRNOG00000003163;ENSRNOG00000003626;ENSRNOG00000004172;ENSRNOG00000005668;ENSRNOG00000005686;ENSRNOG00000006331;ENSRNOG00000006388;ENSRNOG00000006589;ENSRNOG00000006779;ENSRNOG00000006807;ENSRNOG00000006939;ENSRNOG00000006947;ENSRNOG00000007235;ENSRNOG00000007395;…	1.2609e-17	76	448	ENSRNOG00000000064;ENSRNOG00000000658;ENSRNOG00000001314;ENSRNOG00000001797;ENSRNOG00000001967;ENSRNOG00000002186;ENSRNOG00000003302;ENSRNOG00000005668;ENSRNOG00000005861;ENSRNOG00000006388;ENSRNOG00000006589;ENSRNOG00000006779;ENSRNOG00000006947;ENSRNOG00000007235;ENSRNOG00000007395;ENSRNOG00000007895;ENSRNOG00000008572;ENSRNOG00000008798;ENSRNOG00000009094;ENSRNOG00000009565;ENSRNOG00000009994;…	1.29958e-12
GO:0019752	carboxylic acid metabolic process	28	799	ENSRNOG00000001517;ENSRNOG00000003253;ENSRNOG00000003763;ENSRNOG00000006807;ENSRNOG00000007069;ENSRNOG00000010539;ENSRNOG00000011351;ENSRNOG00000011573;ENSRNOG00000012436;ENSRNOG00000012794;ENSRNOG00000013304;ENSRNOG00000013409;ENSRNOG00000015072;ENSRNOG00000018404;ENSRNOG00000018522;ENSRNOG00000018755;ENSRNOG00000019626;ENSRNOG00000020081;ENSRNOG00000020202;ENSRNOG00000023150;ENSRNOG00000023856;…	4.96469e-07	174	799	ENSRNOG00000000185;ENSRNOG00000000658;ENSRNOG00000000867;ENSRNOG00000000967;ENSRNOG00000001142;ENSRNOG00000001177;ENSRNOG00000001391;ENSRNOG00000001889;ENSRNOG00000002358;ENSRNOG00000002393;ENSRNOG00000002478;ENSRNOG00000002609;ENSRNOG00000002636;ENSRNOG00000002642;ENSRNOG00000002643;ENSRNOG00000002991;ENSRNOG00000003163;ENSRNOG00000003223;ENSRNOG00000003228;ENSRNOG00000003253;ENSRNOG00000003709;…	4.6987e-31	159	799	ENSRNOG00000000158;ENSRNOG00000000582;ENSRNOG00000000658;ENSRNOG00000000903;ENSRNOG00000000967;ENSRNOG00000001142;ENSRNOG00000001391;ENSRNOG00000001823;ENSRNOG00000001973;ENSRNOG00000002358;ENSRNOG00000002393;ENSRNOG00000002478;ENSRNOG00000002636;ENSRNOG00000002642;ENSRNOG00000002701;ENSRNOG00000003228;ENSRNOG00000004377;ENSRNOG00000004601;ENSRNOG00000005266;ENSRNOG00000005275;ENSRNOG00000005849;…	6.72724e-36
GO:0031960	response to corticosteroid	7	192	ENSRNOG00000003515;ENSRNOG00000007946;ENSRNOG00000013304;ENSRNOG00000013439;ENSRNOG00000015654;ENSRNOG00000023856;ENSRNOG00000059947	0.037594	33	192	ENSRNOG00000000165;ENSRNOG00000000521;ENSRNOG00000000853;ENSRNOG00000001926;ENSRNOG00000003500;ENSRNOG00000003515;ENSRNOG00000003977;ENSRNOG00000004060;ENSRNOG00000004332;ENSRNOG00000006589;ENSRNOG00000007041;ENSRNOG00000008012;ENSRNOG00000008015;ENSRNOG00000010196;ENSRNOG00000010746;ENSRNOG00000012473;ENSRNOG00000012582;ENSRNOG00000012840;ENSRNOG00000013954;ENSRNOG00000014525;ENSRNOG00000015206;…	0.00108359	29	192	ENSRNOG00000000158;ENSRNOG00000000165;ENSRNOG00000000521;ENSRNOG00000001926;ENSRNOG00000002050;ENSRNOG00000003977;ENSRNOG00000004060;ENSRNOG00000006067;ENSRNOG00000006589;ENSRNOG00000008012;ENSRNOG00000008837;ENSRNOG00000010746;ENSRNOG00000013704;ENSRNOG00000013954;ENSRNOG00000014525;ENSRNOG00000015206;ENSRNOG00000015654;ENSRNOG00000016770;ENSRNOG00000016957;ENSRNOG00000018237;ENSRNOG00000018566;…	0.000548551
GO:0032787	monocarboxylic acid metabolic process	18	478	ENSRNOG00000001517;ENSRNOG00000006807;ENSRNOG00000010539;ENSRNOG00000012436;ENSRNOG00000012794;ENSRNOG00000015072;ENSRNOG00000018522;ENSRNOG00000018755;ENSRNOG00000019626;ENSRNOG00000020081;ENSRNOG00000020202;ENSRNOG00000023150;ENSRNOG00000023856;ENSRNOG00000031312;ENSRNOG00000046889;ENSRNOG00000047565;ENSRNOG00000050585;ENSRNOG00000061499	9.31445e-05	116	478	ENSRNOG00000000658;ENSRNOG00000000967;ENSRNOG00000001142;ENSRNOG00000001177;ENSRNOG00000002358;ENSRNOG00000002478;ENSRNOG00000002636;ENSRNOG00000002642;ENSRNOG00000002991;ENSRNOG00000003223;ENSRNOG00000003228;ENSRNOG00000003709;ENSRNOG00000004172;ENSRNOG00000004377;ENSRNOG00000004649;ENSRNOG00000006331;ENSRNOG00000006508;ENSRNOG00000006589;ENSRNOG00000006675;ENSRNOG00000006779;ENSRNOG00000006807;…	2.98381e-24	103	478	ENSRNOG00000000658;ENSRNOG00000000967;ENSRNOG00000001142;ENSRNOG00000001973;ENSRNOG00000002358;ENSRNOG00000002478;ENSRNOG00000002636;ENSRNOG00000002642;ENSRNOG00000003228;ENSRNOG00000004377;ENSRNOG00000004601;ENSRNOG00000006589;ENSRNOG00000006779;ENSRNOG00000006947;ENSRNOG00000007395;ENSRNOG00000007895;ENSRNOG00000008245;ENSRNOG00000008320;ENSRNOG00000008377;ENSRNOG00000008474;ENSRNOG00000008755;…	3.17989e-25
GO:0033762	response to glucagon	3	21	ENSRNOG00000003253;ENSRNOG00000013304;ENSRNOG00000036692	0.0206655	8	21	ENSRNOG00000000165;ENSRNOG00000003253;ENSRNOG00000006622;ENSRNOG00000008012;ENSRNOG00000020990;ENSRNOG00000028616;ENSRNOG00000036692;ENSRNOG00000046727	0.00345117	8	21	ENSRNOG00000000158;ENSRNOG00000000165;ENSRNOG00000006622;ENSRNOG00000008012;ENSRNOG00000008837;ENSRNOG00000013704;ENSRNOG00000028616;ENSRNOG00000046727	0.000867884
GO:0034308	primary alcohol metabolic process	5	52	ENSRNOG00000002342;ENSRNOG00000012436;ENSRNOG00000015736;ENSRNOG00000016791;ENSRNOG00000050445	0.00407511	12	52	ENSRNOG00000002342;ENSRNOG00000012436;ENSRNOG00000013794;ENSRNOG00000015736;ENSRNOG00000016275;ENSRNOG00000016727;ENSRNOG00000016791;ENSRNOG00000017672;ENSRNOG00000018289;ENSRNOG00000054770;ENSRNOG00000055295;ENSRNOG00000056457	0.0134842	11	52	ENSRNOG00000001967;ENSRNOG00000002342;ENSRNOG00000004601;ENSRNOG00000009734;ENSRNOG00000012436;ENSRNOG00000013794;ENSRNOG00000015518;ENSRNOG00000016727;ENSRNOG00000016791;ENSRNOG00000017672;ENSRNOG00000056457	0.0079373
GO:0034641	cellular nitrogen compound metabolic process	73	5727	ENSRNOG00000000184;ENSRNOG00000000799;ENSRNOG00000001517;ENSRNOG00000002520;ENSRNOG00000002896;ENSRNOG00000003253;ENSRNOG00000003809;ENSRNOG00000003975;ENSRNOG00000004196;ENSRNOG00000004813;ENSRNOG00000005256;ENSRNOG00000005668;ENSRNOG00000005861;ENSRNOG00000006756;ENSRNOG00000006807;ENSRNOG00000007336;ENSRNOG00000007946;ENSRNOG00000009297;ENSRNOG00000010390;ENSRNOG00000011523;ENSRNOG00000011817;…	0.00796634	623	5727	ENSRNOG00000000053;ENSRNOG00000000064;ENSRNOG00000000150;ENSRNOG00000000164;ENSRNOG00000000397;ENSRNOG00000000461;ENSRNOG00000000467;ENSRNOG00000000488;ENSRNOG00000000520;ENSRNOG00000000521;ENSRNOG00000000571;ENSRNOG00000000604;ENSRNOG00000000658;ENSRNOG00000000799;ENSRNOG00000000808;ENSRNOG00000000815;ENSRNOG00000000841;ENSRNOG00000000853;ENSRNOG00000000867;ENSRNOG00000000909;ENSRNOG00000000923;…	7.79877e-16	434	5727	ENSRNOG00000000053;ENSRNOG00000000064;ENSRNOG00000000150;ENSRNOG00000000164;ENSRNOG00000000397;ENSRNOG00000000422;ENSRNOG00000000461;ENSRNOG00000000520;ENSRNOG00000000521;ENSRNOG00000000604;ENSRNOG00000000658;ENSRNOG00000000799;ENSRNOG00000001030;ENSRNOG00000001050;ENSRNOG00000001106;ENSRNOG00000001203;ENSRNOG00000001314;ENSRNOG00000001647;ENSRNOG00000001738;ENSRNOG00000001797;ENSRNOG00000001967;…	0.000626129
GO:0043436	oxoacid metabolic process	28	833	ENSRNOG00000001517;ENSRNOG00000003253;ENSRNOG00000003763;ENSRNOG00000006807;ENSRNOG00000007069;ENSRNOG00000010539;ENSRNOG00000011351;ENSRNOG00000011573;ENSRNOG00000012436;ENSRNOG00000012794;ENSRNOG00000013304;ENSRNOG00000013409;ENSRNOG00000015072;ENSRNOG00000018404;ENSRNOG00000018522;ENSRNOG00000018755;ENSRNOG00000019626;ENSRNOG00000020081;ENSRNOG00000020202;ENSRNOG00000023150;ENSRNOG00000023856;…	9.47235e-07	176	833	ENSRNOG00000000185;ENSRNOG00000000658;ENSRNOG00000000867;ENSRNOG00000000967;ENSRNOG00000001142;ENSRNOG00000001177;ENSRNOG00000001391;ENSRNOG00000001889;ENSRNOG00000002358;ENSRNOG00000002393;ENSRNOG00000002478;ENSRNOG00000002609;ENSRNOG00000002636;ENSRNOG00000002642;ENSRNOG00000002643;ENSRNOG00000002991;ENSRNOG00000003163;ENSRNOG00000003223;ENSRNOG00000003228;ENSRNOG00000003253;ENSRNOG00000003709;…	8.78027e-30	163	833	ENSRNOG00000000158;ENSRNOG00000000582;ENSRNOG00000000658;ENSRNOG00000000903;ENSRNOG00000000967;ENSRNOG00000001142;ENSRNOG00000001391;ENSRNOG00000001823;ENSRNOG00000001967;ENSRNOG00000001973;ENSRNOG00000002358;ENSRNOG00000002393;ENSRNOG00000002478;ENSRNOG00000002636;ENSRNOG00000002642;ENSRNOG00000002701;ENSRNOG00000003228;ENSRNOG00000003728;ENSRNOG00000004377;ENSRNOG00000004601;ENSRNOG00000005266;…	6.72724e-36
GO:0043603	cellular amide metabolic process	29	1204	ENSRNOG00000000799;ENSRNOG00000001517;ENSRNOG00000004196;ENSRNOG00000005256;ENSRNOG00000005861;ENSRNOG00000009297;ENSRNOG00000011817;ENSRNOG00000013304;ENSRNOG00000013409;ENSRNOG00000013439;ENSRNOG00000015335;ENSRNOG00000016220;ENSRNOG00000016459;ENSRNOG00000016896;ENSRNOG00000018320;ENSRNOG00000018404;ENSRNOG00000018755;ENSRNOG00000019453;ENSRNOG00000020202;ENSRNOG00000025602;ENSRNOG00000028505;…	0.000199829	189	1204	ENSRNOG00000000150;ENSRNOG00000000164;ENSRNOG00000000571;ENSRNOG00000000658;ENSRNOG00000000799;ENSRNOG00000000815;ENSRNOG00000000841;ENSRNOG00000000867;ENSRNOG00000001148;ENSRNOG00000001598;ENSRNOG00000001602;ENSRNOG00000001842;ENSRNOG00000002115;ENSRNOG00000002393;ENSRNOG00000002569;ENSRNOG00000002609;ENSRNOG00000002735;ENSRNOG00000002828;ENSRNOG00000003223;ENSRNOG00000004107;ENSRNOG00000004172;…	1.81559e-16	119	1204	ENSRNOG00000000150;ENSRNOG00000000164;ENSRNOG00000000658;ENSRNOG00000000799;ENSRNOG00000001050;ENSRNOG00000001106;ENSRNOG00000001738;ENSRNOG00000002292;ENSRNOG00000002393;ENSRNOG00000002735;ENSRNOG00000004161;ENSRNOG00000004741;ENSRNOG00000005266;ENSRNOG00000005275;ENSRNOG00000005849;ENSRNOG00000005861;ENSRNOG00000006302;ENSRNOG00000006947;ENSRNOG00000007395;ENSRNOG00000007895;ENSRNOG00000008551;…	7.00551e-05
GO:0043648	dicarboxylic acid metabolic process	5	85	ENSRNOG00000007069;ENSRNOG00000012794;ENSRNOG00000013409;ENSRNOG00000047023;ENSRNOG00000061876	0.0241925	18	85	ENSRNOG00000003709;ENSRNOG00000005686;ENSRNOG00000006302;ENSRNOG00000007069;ENSRNOG00000009715;ENSRNOG00000011861;ENSRNOG00000013331;ENSRNOG00000015077;ENSRNOG00000016348;ENSRNOG00000016349;ENSRNOG00000016924;ENSRNOG00000018044;ENSRNOG00000028616;ENSRNOG00000029993;ENSRNOG00000031263;ENSRNOG00000046763;ENSRNOG00000047023;ENSRNOG00000061876	0.00345117	24	85	ENSRNOG00000000582;ENSRNOG00000000903;ENSRNOG00000005266;ENSRNOG00000005275;ENSRNOG00000006302;ENSRNOG00000008103;ENSRNOG00000008837;ENSRNOG00000009715;ENSRNOG00000012794;ENSRNOG00000013409;ENSRNOG00000013949;ENSRNOG00000015077;ENSRNOG00000016349;ENSRNOG00000016924;ENSRNOG00000017481;ENSRNOG00000018044;ENSRNOG00000019372;ENSRNOG00000020879;ENSRNOG00000028616;ENSRNOG00000029993;ENSRNOG00000046763;…	4.43828e-08
GO:0044237	cellular metabolic process	113	9460	ENSRNOG00000000184;ENSRNOG00000000443;ENSRNOG00000000527;ENSRNOG00000000557;ENSRNOG00000000799;ENSRNOG00000001517;ENSRNOG00000002218;ENSRNOG00000002342;ENSRNOG00000002520;ENSRNOG00000002896;ENSRNOG00000003253;ENSRNOG00000003515;ENSRNOG00000003763;ENSRNOG00000003809;ENSRNOG00000003975;ENSRNOG00000004196;ENSRNOG00000004813;ENSRNOG00000005256;ENSRNOG00000005542;ENSRNOG00000005668;ENSRNOG00000005763;…	0.000446732	1012	9460	ENSRNOG00000000053;ENSRNOG00000000064;ENSRNOG00000000068;ENSRNOG00000000150;ENSRNOG00000000164;ENSRNOG00000000165;ENSRNOG00000000172;ENSRNOG00000000177;ENSRNOG00000000185;ENSRNOG00000000186;ENSRNOG00000000322;ENSRNOG00000000397;ENSRNOG00000000411;ENSRNOG00000000461;ENSRNOG00000000467;ENSRNOG00000000488;ENSRNOG00000000520;ENSRNOG00000000521;ENSRNOG00000000527;ENSRNOG00000000557;ENSRNOG00000000571;…	3.81678e-35	775	9460	ENSRNOG00000000048;ENSRNOG00000000053;ENSRNOG00000000064;ENSRNOG00000000068;ENSRNOG00000000150;ENSRNOG00000000158;ENSRNOG00000000164;ENSRNOG00000000165;ENSRNOG00000000186;ENSRNOG00000000397;ENSRNOG00000000422;ENSRNOG00000000438;ENSRNOG00000000461;ENSRNOG00000000520;ENSRNOG00000000521;ENSRNOG00000000527;ENSRNOG00000000582;ENSRNOG00000000604;ENSRNOG00000000610;ENSRNOG00000000658;ENSRNOG00000000796;…	1.22454e-21
GO:0044238	primary metabolic process	105	9545	ENSRNOG00000000184;ENSRNOG00000000443;ENSRNOG00000000527;ENSRNOG00000000799;ENSRNOG00000001517;ENSRNOG00000002218;ENSRNOG00000002342;ENSRNOG00000002520;ENSRNOG00000002896;ENSRNOG00000003253;ENSRNOG00000003763;ENSRNOG00000003975;ENSRNOG00000004196;ENSRNOG00000004813;ENSRNOG00000005256;ENSRNOG00000005542;ENSRNOG00000005668;ENSRNOG00000005861;ENSRNOG00000006756;ENSRNOG00000006787;ENSRNOG00000006807;…	0.0277238	979	9545	ENSRNOG00000000053;ENSRNOG00000000064;ENSRNOG00000000068;ENSRNOG00000000150;ENSRNOG00000000164;ENSRNOG00000000165;ENSRNOG00000000177;ENSRNOG00000000185;ENSRNOG00000000322;ENSRNOG00000000397;ENSRNOG00000000411;ENSRNOG00000000461;ENSRNOG00000000467;ENSRNOG00000000488;ENSRNOG00000000520;ENSRNOG00000000521;ENSRNOG00000000527;ENSRNOG00000000571;ENSRNOG00000000604;ENSRNOG00000000658;ENSRNOG00000000796;…	4.87478e-24	757	9545	ENSRNOG00000000048;ENSRNOG00000000053;ENSRNOG00000000064;ENSRNOG00000000068;ENSRNOG00000000150;ENSRNOG00000000158;ENSRNOG00000000164;ENSRNOG00000000165;ENSRNOG00000000397;ENSRNOG00000000422;ENSRNOG00000000438;ENSRNOG00000000461;ENSRNOG00000000520;ENSRNOG00000000521;ENSRNOG00000000527;ENSRNOG00000000582;ENSRNOG00000000604;ENSRNOG00000000658;ENSRNOG00000000796;ENSRNOG00000000799;ENSRNOG00000000800;…	7.56509e-16
GO:0044255	cellular lipid metabolic process	19	827	ENSRNOG00000001517;ENSRNOG00000002342;ENSRNOG00000002896;ENSRNOG00000005542;ENSRNOG00000010539;ENSRNOG00000011330;ENSRNOG00000012436;ENSRNOG00000015072;ENSRNOG00000015736;ENSRNOG00000016791;ENSRNOG00000018522;ENSRNOG00000018755;ENSRNOG00000019626;ENSRNOG00000028368;ENSRNOG00000031312;ENSRNOG00000046889;ENSRNOG00000047565;ENSRNOG00000050445;ENSRNOG00000061499	0.0060217	135	827	ENSRNOG00000000177;ENSRNOG00000000411;ENSRNOG00000000571;ENSRNOG00000000658;ENSRNOG00000000815;ENSRNOG00000000967;ENSRNOG00000001142;ENSRNOG00000001177;ENSRNOG00000001189;ENSRNOG00000002342;ENSRNOG00000002358;ENSRNOG00000002478;ENSRNOG00000002642;ENSRNOG00000003223;ENSRNOG00000003228;ENSRNOG00000003500;ENSRNOG00000004172;ENSRNOG00000004332;ENSRNOG00000004377;ENSRNOG00000004464;ENSRNOG00000004649;…	9.64253e-13	121	827	ENSRNOG00000000658;ENSRNOG00000000967;ENSRNOG00000001142;ENSRNOG00000002342;ENSRNOG00000002358;ENSRNOG00000002478;ENSRNOG00000002642;ENSRNOG00000003228;ENSRNOG00000004089;ENSRNOG00000004377;ENSRNOG00000004464;ENSRNOG00000004601;ENSRNOG00000005360;ENSRNOG00000005542;ENSRNOG00000006779;ENSRNOG00000007395;ENSRNOG00000007422;ENSRNOG00000007496;ENSRNOG00000008167;ENSRNOG00000008245;ENSRNOG00000008320;…	2.89927e-15
GO:0044272	sulfur compound biosynthetic process	5	78	ENSRNOG00000001517;ENSRNOG00000011351;ENSRNOG00000011573;ENSRNOG00000013409;ENSRNOG00000018755	0.0176086	20	78	ENSRNOG00000000185;ENSRNOG00000000658;ENSRNOG00000002643;ENSRNOG00000004172;ENSRNOG00000006302;ENSRNOG00000006331;ENSRNOG00000006947;ENSRNOG00000007895;ENSRNOG00000008553;ENSRNOG00000009565;ENSRNOG00000013520;ENSRNOG00000014522;ENSRNOG00000016924;ENSRNOG00000018755;ENSRNOG00000018964;ENSRNOG00000019014;ENSRNOG00000019180;ENSRNOG00000026211;ENSRNOG00000048949;ENSRNOG00000061857	0.000129677	19	78	ENSRNOG00000000158;ENSRNOG00000000658;ENSRNOG00000003177;ENSRNOG00000003728;ENSRNOG00000006302;ENSRNOG00000006947;ENSRNOG00000007895;ENSRNOG00000009565;ENSRNOG00000009994;ENSRNOG00000010633;ENSRNOG00000011200;ENSRNOG00000013409;ENSRNOG00000014522;ENSRNOG00000016924;ENSRNOG00000018755;ENSRNOG00000018964;ENSRNOG00000019180;ENSRNOG00000040120;ENSRNOG00000048949	1.92005e-05
GO:0044281	small molecule metabolic process	51	1563	ENSRNOG00000001517;ENSRNOG00000002342;ENSRNOG00000003253;ENSRNOG00000003515;ENSRNOG00000003763;ENSRNOG00000005542;ENSRNOG00000005668;ENSRNOG00000005861;ENSRNOG00000006787;ENSRNOG00000006807;ENSRNOG00000007069;ENSRNOG00000007946;ENSRNOG00000009550;ENSRNOG00000010539;ENSRNOG00000010635;ENSRNOG00000011351;ENSRNOG00000011573;ENSRNOG00000012436;ENSRNOG00000012550;ENSRNOG00000012794;ENSRNOG00000013304;…	2.43392e-13	306	1563	ENSRNOG00000000064;ENSRNOG00000000165;ENSRNOG00000000185;ENSRNOG00000000411;ENSRNOG00000000658;ENSRNOG00000000796;ENSRNOG00000000815;ENSRNOG00000000867;ENSRNOG00000000967;ENSRNOG00000001142;ENSRNOG00000001177;ENSRNOG00000001189;ENSRNOG00000001391;ENSRNOG00000001797;ENSRNOG00000001889;ENSRNOG00000002115;ENSRNOG00000002185;ENSRNOG00000002186;ENSRNOG00000002342;ENSRNOG00000002358;ENSRNOG00000002393;…	4.22165e-47	260	1563	ENSRNOG00000000064;ENSRNOG00000000158;ENSRNOG00000000165;ENSRNOG00000000582;ENSRNOG00000000658;ENSRNOG00000000796;ENSRNOG00000000903;ENSRNOG00000000967;ENSRNOG00000001142;ENSRNOG00000001314;ENSRNOG00000001391;ENSRNOG00000001797;ENSRNOG00000001823;ENSRNOG00000001967;ENSRNOG00000001973;ENSRNOG00000002186;ENSRNOG00000002342;ENSRNOG00000002358;ENSRNOG00000002393;ENSRNOG00000002478;ENSRNOG00000002615;…	7.77787e-46
GO:0044282	small molecule catabolic process	12	279	ENSRNOG00000003253;ENSRNOG00000007069;ENSRNOG00000011351;ENSRNOG00000011573;ENSRNOG00000013304;ENSRNOG00000018522;ENSRNOG00000020202;ENSRNOG00000023856;ENSRNOG00000046889;ENSRNOG00000047023;ENSRNOG00000047565;ENSRNOG00000061876	0.000691104	63	279	ENSRNOG00000000658;ENSRNOG00000001177;ENSRNOG00000001391;ENSRNOG00000002636;ENSRNOG00000003253;ENSRNOG00000003709;ENSRNOG00000004377;ENSRNOG00000006460;ENSRNOG00000006508;ENSRNOG00000006675;ENSRNOG00000006779;ENSRNOG00000007069;ENSRNOG00000008474;ENSRNOG00000008755;ENSRNOG00000008798;ENSRNOG00000009488;ENSRNOG00000009615;ENSRNOG00000009845;ENSRNOG00000009982;ENSRNOG00000010128;ENSRNOG00000010196;…	1.62926e-11	60	279	ENSRNOG00000000158;ENSRNOG00000000582;ENSRNOG00000000658;ENSRNOG00000001391;ENSRNOG00000001967;ENSRNOG00000002636;ENSRNOG00000002701;ENSRNOG00000004377;ENSRNOG00000004601;ENSRNOG00000005266;ENSRNOG00000005275;ENSRNOG00000006779;ENSRNOG00000007570;ENSRNOG00000008474;ENSRNOG00000008755;ENSRNOG00000008798;ENSRNOG00000009488;ENSRNOG00000009615;ENSRNOG00000009845;ENSRNOG00000010128;ENSRNOG00000010262;…	2.19319e-14
GO:0044283	small molecule biosynthetic process	15	573	ENSRNOG00000003253;ENSRNOG00000003515;ENSRNOG00000005542;ENSRNOG00000006787;ENSRNOG00000006807;ENSRNOG00000010539;ENSRNOG00000011573;ENSRNOG00000015455;ENSRNOG00000018755;ENSRNOG00000019626;ENSRNOG00000020989;ENSRNOG00000023150;ENSRNOG00000023856;ENSRNOG00000050585;ENSRNOG00000061499	0.00726327	121	573	ENSRNOG00000000411;ENSRNOG00000000658;ENSRNOG00000000796;ENSRNOG00000000815;ENSRNOG00000001142;ENSRNOG00000001189;ENSRNOG00000001797;ENSRNOG00000002115;ENSRNOG00000002186;ENSRNOG00000002478;ENSRNOG00000002636;ENSRNOG00000002642;ENSRNOG00000002643;ENSRNOG00000002671;ENSRNOG00000002693;ENSRNOG00000002928;ENSRNOG00000002991;ENSRNOG00000003223;ENSRNOG00000003228;ENSRNOG00000003253;ENSRNOG00000003515;…	5.56776e-20	102	573	ENSRNOG00000000158;ENSRNOG00000000658;ENSRNOG00000000796;ENSRNOG00000000903;ENSRNOG00000001142;ENSRNOG00000001797;ENSRNOG00000002186;ENSRNOG00000002478;ENSRNOG00000002636;ENSRNOG00000002642;ENSRNOG00000002826;ENSRNOG00000003228;ENSRNOG00000005275;ENSRNOG00000005542;ENSRNOG00000006589;ENSRNOG00000006622;ENSRNOG00000006787;ENSRNOG00000007395;ENSRNOG00000007570;ENSRNOG00000007763;ENSRNOG00000008245;…	1.3081e-18
GO:0045333	cellular respiration	7	151	ENSRNOG00000005668;ENSRNOG00000012550;ENSRNOG00000023387;ENSRNOG00000029971;ENSRNOG00000031033;ENSRNOG00000031053;ENSRNOG00000049394	0.0124291	41	151	ENSRNOG00000003163;ENSRNOG00000004553;ENSRNOG00000005418;ENSRNOG00000005668;ENSRNOG00000005686;ENSRNOG00000005698;ENSRNOG00000006939;ENSRNOG00000007407;ENSRNOG00000007784;ENSRNOG00000007895;ENSRNOG00000008364;ENSRNOG00000009063;ENSRNOG00000009364;ENSRNOG00000010452;ENSRNOG00000012550;ENSRNOG00000013271;ENSRNOG00000013331;ENSRNOG00000014078;ENSRNOG00000014338;ENSRNOG00000014625;ENSRNOG00000015385;…	5.29324e-10	24	151	ENSRNOG00000000610;ENSRNOG00000003302;ENSRNOG00000004553;ENSRNOG00000005668;ENSRNOG00000007784;ENSRNOG00000007895;ENSRNOG00000008103;ENSRNOG00000008364;ENSRNOG00000009994;ENSRNOG00000011849;ENSRNOG00000013949;ENSRNOG00000014625;ENSRNOG00000016190;ENSRNOG00000016470;ENSRNOG00000017481;ENSRNOG00000023587;ENSRNOG00000030237;ENSRNOG00000032134;ENSRNOG00000034242;ENSRNOG00000038372;ENSRNOG00000047781;…	0.00107879
GO:0046034	ATP metabolic process	12	246	ENSRNOG00000005668;ENSRNOG00000006807;ENSRNOG00000007946;ENSRNOG00000012550;ENSRNOG00000015320;ENSRNOG00000023150;ENSRNOG00000023387;ENSRNOG00000029971;ENSRNOG00000031033;ENSRNOG00000031053;ENSRNOG00000049394;ENSRNOG00000050585	0.000352972	58	246	ENSRNOG00000000064;ENSRNOG00000002928;ENSRNOG00000003163;ENSRNOG00000003626;ENSRNOG00000005668;ENSRNOG00000006589;ENSRNOG00000006807;ENSRNOG00000006939;ENSRNOG00000007235;ENSRNOG00000007407;ENSRNOG00000009063;ENSRNOG00000009364;ENSRNOG00000010452;ENSRNOG00000010558;ENSRNOG00000012550;ENSRNOG00000013331;ENSRNOG00000013791;ENSRNOG00000014078;ENSRNOG00000014338;ENSRNOG00000014625;ENSRNOG00000015290;…	2.05405e-11	29	246	ENSRNOG00000000064;ENSRNOG00000001314;ENSRNOG00000003302;ENSRNOG00000005668;ENSRNOG00000006589;ENSRNOG00000007235;ENSRNOG00000010558;ENSRNOG00000011849;ENSRNOG00000013791;ENSRNOG00000014625;ENSRNOG00000015320;ENSRNOG00000016190;ENSRNOG00000016470;ENSRNOG00000019742;ENSRNOG00000020420;ENSRNOG00000023150;ENSRNOG00000023587;ENSRNOG00000030237;ENSRNOG00000032134;ENSRNOG00000034242;ENSRNOG00000038372;…	0.0190605
GO:0046165	alcohol biosynthetic process	6	113	ENSRNOG00000003253;ENSRNOG00000003515;ENSRNOG00000005542;ENSRNOG00000006787;ENSRNOG00000015455;ENSRNOG00000020989	0.0145068	23	113	ENSRNOG00000000411;ENSRNOG00000002115;ENSRNOG00000002478;ENSRNOG00000003253;ENSRNOG00000003515;ENSRNOG00000004649;ENSRNOG00000005542;ENSRNOG00000009488;ENSRNOG00000010034;ENSRNOG00000010482;ENSRNOG00000012911;ENSRNOG00000013376;ENSRNOG00000015455;ENSRNOG00000016552;ENSRNOG00000017188;ENSRNOG00000018289;ENSRNOG00000020696;ENSRNOG00000020776;ENSRNOG00000020853;ENSRNOG00000028616;ENSRNOG00000047796;…	0.00108628	22	113	ENSRNOG00000002478;ENSRNOG00000002826;ENSRNOG00000005542;ENSRNOG00000006787;ENSRNOG00000009488;ENSRNOG00000011039;ENSRNOG00000011613;ENSRNOG00000012911;ENSRNOG00000013376;ENSRNOG00000013763;ENSRNOG00000016122;ENSRNOG00000016552;ENSRNOG00000017188;ENSRNOG00000020696;ENSRNOG00000020853;ENSRNOG00000020989;ENSRNOG00000028616;ENSRNOG00000047796;ENSRNOG00000049604;ENSRNOG00000054549;ENSRNOG00000056728;…	0.000115135
GO:0046395	carboxylic acid catabolic process	12	191	ENSRNOG00000003253;ENSRNOG00000007069;ENSRNOG00000011351;ENSRNOG00000011573;ENSRNOG00000013304;ENSRNOG00000018522;ENSRNOG00000020202;ENSRNOG00000023856;ENSRNOG00000046889;ENSRNOG00000047023;ENSRNOG00000047565;ENSRNOG00000061876	5.37303e-05	50	191	ENSRNOG00000000658;ENSRNOG00000001177;ENSRNOG00000001391;ENSRNOG00000002636;ENSRNOG00000003253;ENSRNOG00000003709;ENSRNOG00000004377;ENSRNOG00000006460;ENSRNOG00000006508;ENSRNOG00000006675;ENSRNOG00000006779;ENSRNOG00000007069;ENSRNOG00000008474;ENSRNOG00000008755;ENSRNOG00000008798;ENSRNOG00000009615;ENSRNOG00000009845;ENSRNOG00000010128;ENSRNOG00000011599;ENSRNOG00000011622;ENSRNOG00000011684;…	1.55522e-11	49	191	ENSRNOG00000000158;ENSRNOG00000000582;ENSRNOG00000000658;ENSRNOG00000001391;ENSRNOG00000002636;ENSRNOG00000002701;ENSRNOG00000004377;ENSRNOG00000004601;ENSRNOG00000005266;ENSRNOG00000005275;ENSRNOG00000006779;ENSRNOG00000008474;ENSRNOG00000008755;ENSRNOG00000008798;ENSRNOG00000009615;ENSRNOG00000009845;ENSRNOG00000010128;ENSRNOG00000010262;ENSRNOG00000011599;ENSRNOG00000011612;ENSRNOG00000011622;…	8.98316e-15
GO:0048545	response to steroid hormone	10	382	ENSRNOG00000003515;ENSRNOG00000007946;ENSRNOG00000012436;ENSRNOG00000013304;ENSRNOG00000013439;ENSRNOG00000015654;ENSRNOG00000023150;ENSRNOG00000023856;ENSRNOG00000059947;ENSRNOG00000061499	0.0478275	57	382	ENSRNOG00000000165;ENSRNOG00000000521;ENSRNOG00000000853;ENSRNOG00000000989;ENSRNOG00000001926;ENSRNOG00000002642;ENSRNOG00000003500;ENSRNOG00000003515;ENSRNOG00000003977;ENSRNOG00000004060;ENSRNOG00000004332;ENSRNOG00000004537;ENSRNOG00000006589;ENSRNOG00000006622;ENSRNOG00000007029;ENSRNOG00000007041;ENSRNOG00000007229;ENSRNOG00000007607;ENSRNOG00000008012;ENSRNOG00000008015;ENSRNOG00000010196;…	0.000273867	47	382	ENSRNOG00000000158;ENSRNOG00000000165;ENSRNOG00000000521;ENSRNOG00000001926;ENSRNOG00000002050;ENSRNOG00000002642;ENSRNOG00000003977;ENSRNOG00000004060;ENSRNOG00000004537;ENSRNOG00000006067;ENSRNOG00000006589;ENSRNOG00000006622;ENSRNOG00000007029;ENSRNOG00000007229;ENSRNOG00000008012;ENSRNOG00000008837;ENSRNOG00000009446;ENSRNOG00000010643;ENSRNOG00000010746;ENSRNOG00000012087;ENSRNOG00000012436;…	0.000537468
GO:0051156	glucose 6-phosphate metabolic process	3	16	ENSRNOG00000005861;ENSRNOG00000023150;ENSRNOG00000050585	0.0107333	7	16	ENSRNOG00000019458;ENSRNOG00000023150;ENSRNOG00000050585;ENSRNOG00000051171;ENSRNOG00000056728;ENSRNOG00000057626;ENSRNOG00000061527	0.00327435	8	16	ENSRNOG00000005861;ENSRNOG00000017523;ENSRNOG00000019458;ENSRNOG00000023150;ENSRNOG00000050585;ENSRNOG00000051171;ENSRNOG00000056728;ENSRNOG00000057626	0.000101039
GO:0051186	cofactor metabolic process	17	456	ENSRNOG00000001517;ENSRNOG00000002896;ENSRNOG00000003253;ENSRNOG00000003763;ENSRNOG00000005861;ENSRNOG00000006807;ENSRNOG00000007069;ENSRNOG00000011351;ENSRNOG00000013409;ENSRNOG00000015455;ENSRNOG00000018755;ENSRNOG00000023150;ENSRNOG00000046889;ENSRNOG00000047023;ENSRNOG00000050315;ENSRNOG00000050585;ENSRNOG00000056596	0.000190681	101	456	ENSRNOG00000000186;ENSRNOG00000000658;ENSRNOG00000001889;ENSRNOG00000002115;ENSRNOG00000003253;ENSRNOG00000003709;ENSRNOG00000003763;ENSRNOG00000003773;ENSRNOG00000004172;ENSRNOG00000004332;ENSRNOG00000004740;ENSRNOG00000005686;ENSRNOG00000006302;ENSRNOG00000006331;ENSRNOG00000006589;ENSRNOG00000006779;ENSRNOG00000006807;ENSRNOG00000006947;ENSRNOG00000007069;ENSRNOG00000007395;ENSRNOG00000007743;…	4.97855e-18	82	456	ENSRNOG00000000186;ENSRNOG00000000658;ENSRNOG00000001050;ENSRNOG00000003177;ENSRNOG00000005275;ENSRNOG00000005861;ENSRNOG00000006302;ENSRNOG00000006589;ENSRNOG00000006779;ENSRNOG00000006947;ENSRNOG00000007395;ENSRNOG00000007895;ENSRNOG00000008103;ENSRNOG00000008364;ENSRNOG00000008572;ENSRNOG00000008798;ENSRNOG00000009565;ENSRNOG00000009715;ENSRNOG00000009994;ENSRNOG00000010580;ENSRNOG00000010633;…	5.19036e-15
GO:0051188	cofactor biosynthetic process	10	246	ENSRNOG00000001517;ENSRNOG00000003253;ENSRNOG00000006807;ENSRNOG00000011351;ENSRNOG00000013409;ENSRNOG00000015455;ENSRNOG00000018755;ENSRNOG00000023150;ENSRNOG00000050585;ENSRNOG00000056596	0.00342252	51	246	ENSRNOG00000000658;ENSRNOG00000002115;ENSRNOG00000003253;ENSRNOG00000003709;ENSRNOG00000004172;ENSRNOG00000004740;ENSRNOG00000006302;ENSRNOG00000006331;ENSRNOG00000006589;ENSRNOG00000006807;ENSRNOG00000006947;ENSRNOG00000007895;ENSRNOG00000008572;ENSRNOG00000009565;ENSRNOG00000009982;ENSRNOG00000010452;ENSRNOG00000010580;ENSRNOG00000013271;ENSRNOG00000013520;ENSRNOG00000014522;ENSRNOG00000015206;…	4.69914e-08	38	246	ENSRNOG00000000658;ENSRNOG00000003177;ENSRNOG00000006302;ENSRNOG00000006589;ENSRNOG00000006947;ENSRNOG00000007895;ENSRNOG00000008572;ENSRNOG00000009565;ENSRNOG00000009994;ENSRNOG00000010580;ENSRNOG00000010633;ENSRNOG00000011039;ENSRNOG00000013409;ENSRNOG00000013949;ENSRNOG00000014522;ENSRNOG00000015206;ENSRNOG00000016190;ENSRNOG00000016727;ENSRNOG00000016924;ENSRNOG00000018755;ENSRNOG00000018964;…	2.37725e-05
GO:0051384	response to glucocorticoid	7	176	ENSRNOG00000003515;ENSRNOG00000007946;ENSRNOG00000013304;ENSRNOG00000013439;ENSRNOG00000015654;ENSRNOG00000023856;ENSRNOG00000059947	0.0249883	33	176	ENSRNOG00000000165;ENSRNOG00000000521;ENSRNOG00000000853;ENSRNOG00000001926;ENSRNOG00000003500;ENSRNOG00000003515;ENSRNOG00000003977;ENSRNOG00000004060;ENSRNOG00000004332;ENSRNOG00000006589;ENSRNOG00000007041;ENSRNOG00000008012;ENSRNOG00000008015;ENSRNOG00000010196;ENSRNOG00000010746;ENSRNOG00000012473;ENSRNOG00000012582;ENSRNOG00000012840;ENSRNOG00000013954;ENSRNOG00000014525;ENSRNOG00000015206;…	0.000220261	28	176	ENSRNOG00000000158;ENSRNOG00000000165;ENSRNOG00000000521;ENSRNOG00000001926;ENSRNOG00000002050;ENSRNOG00000003977;ENSRNOG00000004060;ENSRNOG00000006589;ENSRNOG00000008012;ENSRNOG00000008837;ENSRNOG00000010746;ENSRNOG00000013704;ENSRNOG00000013954;ENSRNOG00000014525;ENSRNOG00000015206;ENSRNOG00000015654;ENSRNOG00000016770;ENSRNOG00000016957;ENSRNOG00000018237;ENSRNOG00000018566;ENSRNOG00000018740;…	0.000304093
GO:0055086	nucleobase-containing small molecule metabolic process	17	615	ENSRNOG00000001517;ENSRNOG00000005668;ENSRNOG00000005861;ENSRNOG00000006807;ENSRNOG00000007946;ENSRNOG00000012550;ENSRNOG00000015320;ENSRNOG00000018755;ENSRNOG00000023150;ENSRNOG00000023387;ENSRNOG00000029971;ENSRNOG00000031033;ENSRNOG00000031053;ENSRNOG00000046889;ENSRNOG00000049394;ENSRNOG00000050315;ENSRNOG00000050585	0.00189024	128	615	ENSRNOG00000000064;ENSRNOG00000000658;ENSRNOG00000000815;ENSRNOG00000001797;ENSRNOG00000001889;ENSRNOG00000002186;ENSRNOG00000002643;ENSRNOG00000002671;ENSRNOG00000002693;ENSRNOG00000002928;ENSRNOG00000003163;ENSRNOG00000003626;ENSRNOG00000003709;ENSRNOG00000004172;ENSRNOG00000004883;ENSRNOG00000005668;ENSRNOG00000005686;ENSRNOG00000006331;ENSRNOG00000006589;ENSRNOG00000006779;ENSRNOG00000006807;…	1.4311e-20	100	615	ENSRNOG00000000064;ENSRNOG00000000658;ENSRNOG00000001314;ENSRNOG00000001797;ENSRNOG00000001967;ENSRNOG00000002186;ENSRNOG00000002615;ENSRNOG00000003302;ENSRNOG00000005275;ENSRNOG00000005358;ENSRNOG00000005668;ENSRNOG00000005861;ENSRNOG00000006589;ENSRNOG00000006779;ENSRNOG00000006947;ENSRNOG00000007081;ENSRNOG00000007235;ENSRNOG00000007395;ENSRNOG00000007570;ENSRNOG00000007895;ENSRNOG00000008079;…	2.18517e-15
GO:0055114	oxidation-reduction process	32	995	ENSRNOG00000002218;ENSRNOG00000002342;ENSRNOG00000002896;ENSRNOG00000003253;ENSRNOG00000003763;ENSRNOG00000005668;ENSRNOG00000005861;ENSRNOG00000006787;ENSRNOG00000006807;ENSRNOG00000007069;ENSRNOG00000009550;ENSRNOG00000009875;ENSRNOG00000012436;ENSRNOG00000012550;ENSRNOG00000012794;ENSRNOG00000015072;ENSRNOG00000015455;ENSRNOG00000015736;ENSRNOG00000018522;ENSRNOG00000020775;ENSRNOG00000020989;…	3.14196e-07	203	995	ENSRNOG00000000172;ENSRNOG00000000658;ENSRNOG00000001177;ENSRNOG00000001182;ENSRNOG00000001269;ENSRNOG00000001736;ENSRNOG00000002115;ENSRNOG00000002212;ENSRNOG00000002342;ENSRNOG00000002609;ENSRNOG00000002642;ENSRNOG00000002643;ENSRNOG00000002721;ENSRNOG00000003049;ENSRNOG00000003163;ENSRNOG00000003223;ENSRNOG00000003253;ENSRNOG00000003500;ENSRNOG00000003620;ENSRNOG00000003649;ENSRNOG00000003709;…	2.21714e-32	157	995	ENSRNOG00000000158;ENSRNOG00000000582;ENSRNOG00000000610;ENSRNOG00000000658;ENSRNOG00000001269;ENSRNOG00000001344;ENSRNOG00000001890;ENSRNOG00000002342;ENSRNOG00000002642;ENSRNOG00000002701;ENSRNOG00000002826;ENSRNOG00000003302;ENSRNOG00000003620;ENSRNOG00000004391;ENSRNOG00000004553;ENSRNOG00000004601;ENSRNOG00000005360;ENSRNOG00000005602;ENSRNOG00000005668;ENSRNOG00000005861;ENSRNOG00000005987;…	1.38342e-23
GO:0061008	hepaticobiliary system development	7	156	ENSRNOG00000003253;ENSRNOG00000003515;ENSRNOG00000013304;ENSRNOG00000015335;ENSRNOG00000021027;ENSRNOG00000021097;ENSRNOG00000050761	0.0140738	34	156	ENSRNOG00000000185;ENSRNOG00000000314;ENSRNOG00000000841;ENSRNOG00000000847;ENSRNOG00000000967;ENSRNOG00000001926;ENSRNOG00000003253;ENSRNOG00000003515;ENSRNOG00000004332;ENSRNOG00000005276;ENSRNOG00000005513;ENSRNOG00000007390;ENSRNOG00000007395;ENSRNOG00000009845;ENSRNOG00000010189;ENSRNOG00000010746;ENSRNOG00000012473;ENSRNOG00000013360;ENSRNOG00000014117;ENSRNOG00000016552;ENSRNOG00000016967;…	5.91782e-06	29	156	ENSRNOG00000000967;ENSRNOG00000001926;ENSRNOG00000002292;ENSRNOG00000004281;ENSRNOG00000004741;ENSRNOG00000005276;ENSRNOG00000005513;ENSRNOG00000007395;ENSRNOG00000008095;ENSRNOG00000008837;ENSRNOG00000009845;ENSRNOG00000010746;ENSRNOG00000013704;ENSRNOG00000014117;ENSRNOG00000015439;ENSRNOG00000016552;ENSRNOG00000016967;ENSRNOG00000017976;ENSRNOG00000018740;ENSRNOG00000019113;ENSRNOG00000020578;…	1.19635e-05
GO:0065002	intracellular protein transmembrane transport	4	59	ENSRNOG00000006539;ENSRNOG00000007892;ENSRNOG00000009057;ENSRNOG00000013498	0.0405125	15	59	ENSRNOG00000000314;ENSRNOG00000006539;ENSRNOG00000007040;ENSRNOG00000009057;ENSRNOG00000009063;ENSRNOG00000013498;ENSRNOG00000014525;ENSRNOG00000018556;ENSRNOG00000019682;ENSRNOG00000019811;ENSRNOG00000025156;ENSRNOG00000037638;ENSRNOG00000043114;ENSRNOG00000045555;ENSRNOG00000049819	0.00155423	10	59	ENSRNOG00000006345;ENSRNOG00000006539;ENSRNOG00000007040;ENSRNOG00000007892;ENSRNOG00000008222;ENSRNOG00000009057;ENSRNOG00000013743;ENSRNOG00000014525;ENSRNOG00000018677;ENSRNOG00000025156	0.0483133
GO:0071704	organic substance metabolic process	114	9900	ENSRNOG00000000184;ENSRNOG00000000443;ENSRNOG00000000527;ENSRNOG00000000799;ENSRNOG00000001517;ENSRNOG00000002218;ENSRNOG00000002342;ENSRNOG00000002520;ENSRNOG00000002896;ENSRNOG00000003253;ENSRNOG00000003515;ENSRNOG00000003763;ENSRNOG00000003809;ENSRNOG00000003975;ENSRNOG00000004196;ENSRNOG00000004813;ENSRNOG00000005256;ENSRNOG00000005542;ENSRNOG00000005668;ENSRNOG00000005861;ENSRNOG00000006756;…	0.00146128	1026	9900	ENSRNOG00000000053;ENSRNOG00000000064;ENSRNOG00000000068;ENSRNOG00000000150;ENSRNOG00000000164;ENSRNOG00000000165;ENSRNOG00000000177;ENSRNOG00000000185;ENSRNOG00000000322;ENSRNOG00000000397;ENSRNOG00000000411;ENSRNOG00000000461;ENSRNOG00000000467;ENSRNOG00000000488;ENSRNOG00000000520;ENSRNOG00000000521;ENSRNOG00000000527;ENSRNOG00000000571;ENSRNOG00000000604;ENSRNOG00000000658;ENSRNOG00000000796;…	2.37893e-29	797	9900	ENSRNOG00000000048;ENSRNOG00000000053;ENSRNOG00000000064;ENSRNOG00000000068;ENSRNOG00000000150;ENSRNOG00000000158;ENSRNOG00000000164;ENSRNOG00000000165;ENSRNOG00000000397;ENSRNOG00000000422;ENSRNOG00000000438;ENSRNOG00000000461;ENSRNOG00000000520;ENSRNOG00000000521;ENSRNOG00000000527;ENSRNOG00000000582;ENSRNOG00000000604;ENSRNOG00000000658;ENSRNOG00000000796;ENSRNOG00000000799;ENSRNOG00000000800;…	2.32973e-20
GO:0072329	monocarboxylic acid catabolic process	5	94	ENSRNOG00000018522;ENSRNOG00000020202;ENSRNOG00000023856;ENSRNOG00000046889;ENSRNOG00000047565	0.0347056	32	94	ENSRNOG00000000658;ENSRNOG00000001177;ENSRNOG00000002636;ENSRNOG00000004377;ENSRNOG00000006675;ENSRNOG00000006779;ENSRNOG00000008474;ENSRNOG00000008755;ENSRNOG00000009615;ENSRNOG00000009845;ENSRNOG00000010128;ENSRNOG00000011622;ENSRNOG00000011684;ENSRNOG00000012879;ENSRNOG00000013223;ENSRNOG00000014254;ENSRNOG00000014522;ENSRNOG00000014597;ENSRNOG00000015519;ENSRNOG00000016727;ENSRNOG00000017821;…	1.68351e-10	28	94	ENSRNOG00000000658;ENSRNOG00000002636;ENSRNOG00000004377;ENSRNOG00000004601;ENSRNOG00000006779;ENSRNOG00000008474;ENSRNOG00000008755;ENSRNOG00000009615;ENSRNOG00000009845;ENSRNOG00000010128;ENSRNOG00000011622;ENSRNOG00000013223;ENSRNOG00000014522;ENSRNOG00000015519;ENSRNOG00000016727;ENSRNOG00000017821;ENSRNOG00000018044;ENSRNOG00000018114;ENSRNOG00000018677;ENSRNOG00000018920;ENSRNOG00000019630;…	5.08584e-10
GO:0072330	monocarboxylic acid biosynthetic process	8	240	ENSRNOG00000006807;ENSRNOG00000010539;ENSRNOG00000018755;ENSRNOG00000019626;ENSRNOG00000023150;ENSRNOG00000023856;ENSRNOG00000050585;ENSRNOG00000061499	0.0333075	64	240	ENSRNOG00000000658;ENSRNOG00000001142;ENSRNOG00000002478;ENSRNOG00000002636;ENSRNOG00000002642;ENSRNOG00000002991;ENSRNOG00000003223;ENSRNOG00000003228;ENSRNOG00000003709;ENSRNOG00000004649;ENSRNOG00000006331;ENSRNOG00000006508;ENSRNOG00000006589;ENSRNOG00000006807;ENSRNOG00000007395;ENSRNOG00000008245;ENSRNOG00000008377;ENSRNOG00000009488;ENSRNOG00000009565;ENSRNOG00000010128;ENSRNOG00000010580;…	2.86421e-15	48	240	ENSRNOG00000000658;ENSRNOG00000001142;ENSRNOG00000002478;ENSRNOG00000002636;ENSRNOG00000002642;ENSRNOG00000003228;ENSRNOG00000006589;ENSRNOG00000007395;ENSRNOG00000008245;ENSRNOG00000008377;ENSRNOG00000009488;ENSRNOG00000009565;ENSRNOG00000009630;ENSRNOG00000010128;ENSRNOG00000010580;ENSRNOG00000012911;ENSRNOG00000013004;ENSRNOG00000013552;ENSRNOG00000013763;ENSRNOG00000013794;ENSRNOG00000014522;…	2.3571e-10
GO:0072521	purine-containing compound metabolic process	15	477	ENSRNOG00000001517;ENSRNOG00000005668;ENSRNOG00000006807;ENSRNOG00000007946;ENSRNOG00000012550;ENSRNOG00000015320;ENSRNOG00000018755;ENSRNOG00000023150;ENSRNOG00000023387;ENSRNOG00000029971;ENSRNOG00000031033;ENSRNOG00000031053;ENSRNOG00000046889;ENSRNOG00000049394;ENSRNOG00000050585	0.00142566	107	477	ENSRNOG00000000064;ENSRNOG00000000658;ENSRNOG00000001889;ENSRNOG00000002186;ENSRNOG00000002671;ENSRNOG00000002693;ENSRNOG00000002928;ENSRNOG00000003163;ENSRNOG00000003626;ENSRNOG00000004172;ENSRNOG00000005668;ENSRNOG00000005686;ENSRNOG00000006331;ENSRNOG00000006589;ENSRNOG00000006779;ENSRNOG00000006807;ENSRNOG00000006939;ENSRNOG00000006947;ENSRNOG00000007235;ENSRNOG00000007395;ENSRNOG00000007407;…	1.32007e-19	77	477	ENSRNOG00000000064;ENSRNOG00000000658;ENSRNOG00000001314;ENSRNOG00000001967;ENSRNOG00000002186;ENSRNOG00000003302;ENSRNOG00000005275;ENSRNOG00000005302;ENSRNOG00000005668;ENSRNOG00000006589;ENSRNOG00000006779;ENSRNOG00000006947;ENSRNOG00000007081;ENSRNOG00000007235;ENSRNOG00000007395;ENSRNOG00000007895;ENSRNOG00000008572;ENSRNOG00000008798;ENSRNOG00000009094;ENSRNOG00000009565;ENSRNOG00000009994;…	1.14216e-11
GO:1901564	organonitrogen compound metabolic process	80	6283	ENSRNOG00000000184;ENSRNOG00000000443;ENSRNOG00000000527;ENSRNOG00000000799;ENSRNOG00000001517;ENSRNOG00000003253;ENSRNOG00000003763;ENSRNOG00000003809;ENSRNOG00000004196;ENSRNOG00000005256;ENSRNOG00000005542;ENSRNOG00000005668;ENSRNOG00000005861;ENSRNOG00000006756;ENSRNOG00000006787;ENSRNOG00000006807;ENSRNOG00000007069;ENSRNOG00000007946;ENSRNOG00000009297;ENSRNOG00000010390;ENSRNOG00000010635;…	0.00351046	696	6283	ENSRNOG00000000053;ENSRNOG00000000064;ENSRNOG00000000068;ENSRNOG00000000150;ENSRNOG00000000164;ENSRNOG00000000185;ENSRNOG00000000322;ENSRNOG00000000411;ENSRNOG00000000467;ENSRNOG00000000521;ENSRNOG00000000527;ENSRNOG00000000571;ENSRNOG00000000604;ENSRNOG00000000658;ENSRNOG00000000796;ENSRNOG00000000799;ENSRNOG00000000800;ENSRNOG00000000815;ENSRNOG00000000841;ENSRNOG00000000847;ENSRNOG00000000853;…	4.81913e-21	542	6283	ENSRNOG00000000048;ENSRNOG00000000053;ENSRNOG00000000064;ENSRNOG00000000068;ENSRNOG00000000150;ENSRNOG00000000158;ENSRNOG00000000164;ENSRNOG00000000438;ENSRNOG00000000521;ENSRNOG00000000527;ENSRNOG00000000582;ENSRNOG00000000604;ENSRNOG00000000658;ENSRNOG00000000796;ENSRNOG00000000799;ENSRNOG00000000800;ENSRNOG00000000903;ENSRNOG00000001050;ENSRNOG00000001106;ENSRNOG00000001135;ENSRNOG00000001142;…	2.89927e-15
GO:1901566	organonitrogen compound biosynthetic process	36	1795	ENSRNOG00000000799;ENSRNOG00000001517;ENSRNOG00000003253;ENSRNOG00000004196;ENSRNOG00000005256;ENSRNOG00000005542;ENSRNOG00000006807;ENSRNOG00000007946;ENSRNOG00000009297;ENSRNOG00000010390;ENSRNOG00000011573;ENSRNOG00000011817;ENSRNOG00000013304;ENSRNOG00000013409;ENSRNOG00000015320;ENSRNOG00000015335;ENSRNOG00000015455;ENSRNOG00000016220;ENSRNOG00000016459;ENSRNOG00000016791;ENSRNOG00000016896;…	0.000384794	235	1795	ENSRNOG00000000064;ENSRNOG00000000150;ENSRNOG00000000322;ENSRNOG00000000411;ENSRNOG00000000658;ENSRNOG00000000799;ENSRNOG00000000841;ENSRNOG00000000867;ENSRNOG00000001148;ENSRNOG00000001598;ENSRNOG00000001602;ENSRNOG00000001797;ENSRNOG00000001842;ENSRNOG00000002393;ENSRNOG00000002536;ENSRNOG00000002569;ENSRNOG00000002636;ENSRNOG00000002643;ENSRNOG00000002671;ENSRNOG00000002693;ENSRNOG00000002735;…	1.55522e-11	154	1795	ENSRNOG00000000064;ENSRNOG00000000150;ENSRNOG00000000158;ENSRNOG00000000658;ENSRNOG00000000799;ENSRNOG00000000903;ENSRNOG00000001050;ENSRNOG00000001106;ENSRNOG00000001653;ENSRNOG00000001738;ENSRNOG00000001797;ENSRNOG00000001823;ENSRNOG00000002292;ENSRNOG00000002393;ENSRNOG00000002615;ENSRNOG00000002636;ENSRNOG00000002735;ENSRNOG00000002989;ENSRNOG00000003302;ENSRNOG00000003728;ENSRNOG00000004161;…	0.00289855
GO:1901576	organic substance biosynthetic process	66	5180	ENSRNOG00000000184;ENSRNOG00000000799;ENSRNOG00000001517;ENSRNOG00000002520;ENSRNOG00000003253;ENSRNOG00000003515;ENSRNOG00000003975;ENSRNOG00000004196;ENSRNOG00000005256;ENSRNOG00000005542;ENSRNOG00000005861;ENSRNOG00000006756;ENSRNOG00000006787;ENSRNOG00000006807;ENSRNOG00000007336;ENSRNOG00000007946;ENSRNOG00000009297;ENSRNOG00000009550;ENSRNOG00000010390;ENSRNOG00000010539;ENSRNOG00000011351;…	0.016152	524	5180	ENSRNOG00000000064;ENSRNOG00000000150;ENSRNOG00000000322;ENSRNOG00000000397;ENSRNOG00000000411;ENSRNOG00000000461;ENSRNOG00000000467;ENSRNOG00000000488;ENSRNOG00000000521;ENSRNOG00000000604;ENSRNOG00000000658;ENSRNOG00000000796;ENSRNOG00000000799;ENSRNOG00000000808;ENSRNOG00000000815;ENSRNOG00000000841;ENSRNOG00000000867;ENSRNOG00000000909;ENSRNOG00000000923;ENSRNOG00000000989;ENSRNOG00000001030;…	3.47351e-07	402	5180	ENSRNOG00000000064;ENSRNOG00000000150;ENSRNOG00000000158;ENSRNOG00000000397;ENSRNOG00000000461;ENSRNOG00000000521;ENSRNOG00000000604;ENSRNOG00000000658;ENSRNOG00000000796;ENSRNOG00000000799;ENSRNOG00000000903;ENSRNOG00000001030;ENSRNOG00000001050;ENSRNOG00000001106;ENSRNOG00000001142;ENSRNOG00000001239;ENSRNOG00000001647;ENSRNOG00000001653;ENSRNOG00000001738;ENSRNOG00000001797;ENSRNOG00000001823;…	0.000181099
GO:1901605	alpha-amino acid metabolic process	10	180	ENSRNOG00000003253;ENSRNOG00000003763;ENSRNOG00000007069;ENSRNOG00000011351;ENSRNOG00000011573;ENSRNOG00000013304;ENSRNOG00000013409;ENSRNOG00000020202;ENSRNOG00000023856;ENSRNOG00000061876	0.000579832	34	180	ENSRNOG00000000185;ENSRNOG00000001391;ENSRNOG00000001889;ENSRNOG00000002609;ENSRNOG00000002991;ENSRNOG00000003253;ENSRNOG00000003709;ENSRNOG00000003763;ENSRNOG00000005795;ENSRNOG00000006302;ENSRNOG00000006508;ENSRNOG00000007069;ENSRNOG00000007395;ENSRNOG00000008553;ENSRNOG00000008798;ENSRNOG00000011599;ENSRNOG00000011684;ENSRNOG00000011861;ENSRNOG00000013223;ENSRNOG00000016097;ENSRNOG00000016348;…	0.00014092	37	180	ENSRNOG00000000158;ENSRNOG00000000582;ENSRNOG00000000903;ENSRNOG00000001391;ENSRNOG00000002701;ENSRNOG00000005266;ENSRNOG00000005275;ENSRNOG00000006302;ENSRNOG00000007395;ENSRNOG00000007763;ENSRNOG00000008798;ENSRNOG00000008837;ENSRNOG00000009878;ENSRNOG00000010262;ENSRNOG00000011200;ENSRNOG00000011599;ENSRNOG00000011612;ENSRNOG00000013223;ENSRNOG00000013409;ENSRNOG00000013704;ENSRNOG00000016097;…	2.70697e-08
GO:1901606	alpha-amino acid catabolic process	8	78	ENSRNOG00000003253;ENSRNOG00000007069;ENSRNOG00000011351;ENSRNOG00000011573;ENSRNOG00000013304;ENSRNOG00000020202;ENSRNOG00000023856;ENSRNOG00000061876	0.000133365	16	78	ENSRNOG00000001391;ENSRNOG00000003253;ENSRNOG00000003709;ENSRNOG00000006508;ENSRNOG00000007069;ENSRNOG00000008798;ENSRNOG00000011599;ENSRNOG00000011684;ENSRNOG00000011861;ENSRNOG00000013223;ENSRNOG00000016348;ENSRNOG00000017821;ENSRNOG00000029993;ENSRNOG00000031263;ENSRNOG00000057578;ENSRNOG00000061876	0.00926277	19	78	ENSRNOG00000000158;ENSRNOG00000000582;ENSRNOG00000001391;ENSRNOG00000002701;ENSRNOG00000005266;ENSRNOG00000005275;ENSRNOG00000008798;ENSRNOG00000010262;ENSRNOG00000011599;ENSRNOG00000011612;ENSRNOG00000013223;ENSRNOG00000017752;ENSRNOG00000017777;ENSRNOG00000017821;ENSRNOG00000029993;ENSRNOG00000039494;ENSRNOG00000050214;ENSRNOG00000057578;ENSRNOG00000061876	1.92005e-05
GO:1901615	organic hydroxy compound metabolic process	13	378	ENSRNOG00000002342;ENSRNOG00000003253;ENSRNOG00000003515;ENSRNOG00000005542;ENSRNOG00000006787;ENSRNOG00000009550;ENSRNOG00000012436;ENSRNOG00000015455;ENSRNOG00000015736;ENSRNOG00000016791;ENSRNOG00000019626;ENSRNOG00000020989;ENSRNOG00000050445	0.00187812	60	378	ENSRNOG00000000411;ENSRNOG00000001239;ENSRNOG00000001889;ENSRNOG00000002115;ENSRNOG00000002342;ENSRNOG00000002478;ENSRNOG00000002636;ENSRNOG00000003253;ENSRNOG00000003500;ENSRNOG00000003515;ENSRNOG00000004649;ENSRNOG00000005542;ENSRNOG00000006859;ENSRNOG00000006997;ENSRNOG00000007139;ENSRNOG00000007395;ENSRNOG00000008364;ENSRNOG00000009094;ENSRNOG00000009488;ENSRNOG00000009550;ENSRNOG00000010034;…	2.58231e-05	60	378	ENSRNOG00000001239;ENSRNOG00000001967;ENSRNOG00000002342;ENSRNOG00000002478;ENSRNOG00000002636;ENSRNOG00000002826;ENSRNOG00000004601;ENSRNOG00000005542;ENSRNOG00000006787;ENSRNOG00000006859;ENSRNOG00000007139;ENSRNOG00000007395;ENSRNOG00000008074;ENSRNOG00000008364;ENSRNOG00000009094;ENSRNOG00000009488;ENSRNOG00000009550;ENSRNOG00000009734;ENSRNOG00000009799;ENSRNOG00000009946;ENSRNOG00000010128;…	8.70345e-09
GO:1901617	organic hydroxy compound biosynthetic process	8	181	ENSRNOG00000003253;ENSRNOG00000003515;ENSRNOG00000005542;ENSRNOG00000006787;ENSRNOG00000009550;ENSRNOG00000015455;ENSRNOG00000019626;ENSRNOG00000020989	0.00796634	30	181	ENSRNOG00000000411;ENSRNOG00000001239;ENSRNOG00000002115;ENSRNOG00000002478;ENSRNOG00000003253;ENSRNOG00000003515;ENSRNOG00000004649;ENSRNOG00000005542;ENSRNOG00000007395;ENSRNOG00000009488;ENSRNOG00000009550;ENSRNOG00000010034;ENSRNOG00000010128;ENSRNOG00000010482;ENSRNOG00000012911;ENSRNOG00000013004;ENSRNOG00000013376;ENSRNOG00000015455;ENSRNOG00000016552;ENSRNOG00000017188;ENSRNOG00000018289;…	0.00369537	31	181	ENSRNOG00000001239;ENSRNOG00000002478;ENSRNOG00000002826;ENSRNOG00000005542;ENSRNOG00000006787;ENSRNOG00000007395;ENSRNOG00000009488;ENSRNOG00000009550;ENSRNOG00000010128;ENSRNOG00000011039;ENSRNOG00000011613;ENSRNOG00000012911;ENSRNOG00000013004;ENSRNOG00000013376;ENSRNOG00000013763;ENSRNOG00000016122;ENSRNOG00000016552;ENSRNOG00000017188;ENSRNOG00000019626;ENSRNOG00000020254;ENSRNOG00000020696;…	2.76063e-05
GO:0001913	T cell mediated cytotoxicity	4	47	ENSRNOG00000030712;ENSRNOG00000038999;ENSRNOG00000042905;ENSRNOG00000050210	0.0205504	10	47	ENSRNOG00000000723;ENSRNOG00000009020;ENSRNOG00000017123;ENSRNOG00000018730;ENSRNOG00000020578;ENSRNOG00000029386;ENSRNOG00000042905;ENSRNOG00000045924;ENSRNOG00000050210;ENSRNOG00000050647	0.0498874
GO:0001914	regulation of T cell mediated cytotoxicity	4	35	ENSRNOG00000030712;ENSRNOG00000038999;ENSRNOG00000042905;ENSRNOG00000050210	0.00858848	9	35	ENSRNOG00000000723;ENSRNOG00000017123;ENSRNOG00000018730;ENSRNOG00000020578;ENSRNOG00000029386;ENSRNOG00000042905;ENSRNOG00000045924;ENSRNOG00000050210;ENSRNOG00000050647	0.024259
GO:0001916	positive regulation of T cell mediated cytotoxicity	4	29	ENSRNOG00000030712;ENSRNOG00000038999;ENSRNOG00000042905;ENSRNOG00000050210	0.0049456	8	29	ENSRNOG00000000723;ENSRNOG00000017123;ENSRNOG00000018730;ENSRNOG00000029386;ENSRNOG00000042905;ENSRNOG00000045924;ENSRNOG00000050210;ENSRNOG00000050647	0.0262173
GO:0002474	antigen processing and presentation of peptide antigen via MHC class I	5	33	ENSRNOG00000029500;ENSRNOG00000030712;ENSRNOG00000038999;ENSRNOG00000042905;ENSRNOG00000050210	0.000744426	11	33	ENSRNOG00000000723;ENSRNOG00000016967;ENSRNOG00000017123;ENSRNOG00000027552;ENSRNOG00000029386;ENSRNOG00000029500;ENSRNOG00000039744;ENSRNOG00000042905;ENSRNOG00000045924;ENSRNOG00000050183;ENSRNOG00000050210	0.00108172
GO:0002475	antigen processing and presentation via MHC class Ib	4	23	ENSRNOG00000030712;ENSRNOG00000038999;ENSRNOG00000042905;ENSRNOG00000050210	0.00224875	7	23	ENSRNOG00000000723;ENSRNOG00000017123;ENSRNOG00000018977;ENSRNOG00000029386;ENSRNOG00000042905;ENSRNOG00000045924;ENSRNOG00000050210	0.0268851
GO:0002483	antigen processing and presentation of endogenous peptide antigen	5	26	ENSRNOG00000029500;ENSRNOG00000030712;ENSRNOG00000038999;ENSRNOG00000042905;ENSRNOG00000050210	0.000384794	8	26	ENSRNOG00000000723;ENSRNOG00000016967;ENSRNOG00000017123;ENSRNOG00000029386;ENSRNOG00000029500;ENSRNOG00000042905;ENSRNOG00000045924;ENSRNOG00000050210	0.0132174
GO:0006119	oxidative phosphorylation	7	92	ENSRNOG00000005668;ENSRNOG00000012550;ENSRNOG00000023387;ENSRNOG00000029971;ENSRNOG00000031033;ENSRNOG00000031053;ENSRNOG00000049394	0.00118469	29	92	ENSRNOG00000003163;ENSRNOG00000005668;ENSRNOG00000006939;ENSRNOG00000007407;ENSRNOG00000009063;ENSRNOG00000009364;ENSRNOG00000010452;ENSRNOG00000010558;ENSRNOG00000012550;ENSRNOG00000013331;ENSRNOG00000014078;ENSRNOG00000015385;ENSRNOG00000016190;ENSRNOG00000016660;ENSRNOG00000017446;ENSRNOG00000018281;ENSRNOG00000018289;ENSRNOG00000018816;ENSRNOG00000023387;ENSRNOG00000024967;ENSRNOG00000029971;…	1.10157e-08
GO:0006120	mitochondrial electron transport, NADH to ubiquinone	4	22	ENSRNOG00000005668;ENSRNOG00000023387;ENSRNOG00000031033;ENSRNOG00000049394	0.00190296	13	22	ENSRNOG00000005668;ENSRNOG00000006939;ENSRNOG00000009063;ENSRNOG00000009364;ENSRNOG00000014078;ENSRNOG00000015385;ENSRNOG00000016190;ENSRNOG00000017446;ENSRNOG00000018289;ENSRNOG00000023387;ENSRNOG00000031033;ENSRNOG00000042503;ENSRNOG00000049394	1.36629e-07
GO:0006412	translation	19	875	ENSRNOG00000000799;ENSRNOG00000004196;ENSRNOG00000005256;ENSRNOG00000009297;ENSRNOG00000011817;ENSRNOG00000015335;ENSRNOG00000016220;ENSRNOG00000016459;ENSRNOG00000016896;ENSRNOG00000018320;ENSRNOG00000018404;ENSRNOG00000019453;ENSRNOG00000025602;ENSRNOG00000028505;ENSRNOG00000028690;ENSRNOG00000033024;ENSRNOG00000033803;ENSRNOG00000033916;ENSRNOG00000037673	0.0100453	124	875	ENSRNOG00000000150;ENSRNOG00000000799;ENSRNOG00000000841;ENSRNOG00000000867;ENSRNOG00000001148;ENSRNOG00000001598;ENSRNOG00000001602;ENSRNOG00000001842;ENSRNOG00000002393;ENSRNOG00000002569;ENSRNOG00000002735;ENSRNOG00000002828;ENSRNOG00000004107;ENSRNOG00000004196;ENSRNOG00000004332;ENSRNOG00000005418;ENSRNOG00000006467;ENSRNOG00000006898;ENSRNOG00000006990;ENSRNOG00000006997;ENSRNOG00000007213;…	8.23286e-08
GO:0006518	peptide metabolic process	21	1009	ENSRNOG00000000799;ENSRNOG00000004196;ENSRNOG00000005256;ENSRNOG00000009297;ENSRNOG00000011817;ENSRNOG00000013409;ENSRNOG00000013439;ENSRNOG00000015335;ENSRNOG00000016220;ENSRNOG00000016459;ENSRNOG00000016896;ENSRNOG00000018320;ENSRNOG00000018404;ENSRNOG00000019453;ENSRNOG00000025602;ENSRNOG00000028505;ENSRNOG00000028690;ENSRNOG00000033024;ENSRNOG00000033803;ENSRNOG00000033916;ENSRNOG00000037673	0.00893903	153	1009	ENSRNOG00000000150;ENSRNOG00000000164;ENSRNOG00000000799;ENSRNOG00000000841;ENSRNOG00000000867;ENSRNOG00000001148;ENSRNOG00000001598;ENSRNOG00000001602;ENSRNOG00000001842;ENSRNOG00000002115;ENSRNOG00000002393;ENSRNOG00000002569;ENSRNOG00000002609;ENSRNOG00000002735;ENSRNOG00000002828;ENSRNOG00000004107;ENSRNOG00000004196;ENSRNOG00000004332;ENSRNOG00000005418;ENSRNOG00000006302;ENSRNOG00000006467;…	7.91465e-12
GO:0016101	diterpenoid metabolic process	4	49	ENSRNOG00000002342;ENSRNOG00000011330;ENSRNOG00000012436;ENSRNOG00000015736	0.0234352	12	49	ENSRNOG00000002342;ENSRNOG00000002358;ENSRNOG00000004332;ENSRNOG00000012436;ENSRNOG00000013794;ENSRNOG00000014907;ENSRNOG00000015736;ENSRNOG00000016275;ENSRNOG00000024705;ENSRNOG00000031004;ENSRNOG00000054770;ENSRNOG00000055295	0.0086663
GO:0019882	antigen processing and presentation	5	79	ENSRNOG00000029500;ENSRNOG00000030712;ENSRNOG00000038999;ENSRNOG00000042905;ENSRNOG00000050210	0.0183256	18	79	ENSRNOG00000000322;ENSRNOG00000000723;ENSRNOG00000006130;ENSRNOG00000016967;ENSRNOG00000017123;ENSRNOG00000018176;ENSRNOG00000018977;ENSRNOG00000027552;ENSRNOG00000029386;ENSRNOG00000029500;ENSRNOG00000033215;ENSRNOG00000039744;ENSRNOG00000042905;ENSRNOG00000045924;ENSRNOG00000047088;ENSRNOG00000050183;ENSRNOG00000050210;ENSRNOG00000053306	0.00146948
GO:0019883	antigen processing and presentation of endogenous antigen	5	28	ENSRNOG00000029500;ENSRNOG00000030712;ENSRNOG00000038999;ENSRNOG00000042905;ENSRNOG00000050210	0.000519413	9	28	ENSRNOG00000000322;ENSRNOG00000000723;ENSRNOG00000016967;ENSRNOG00000017123;ENSRNOG00000029386;ENSRNOG00000029500;ENSRNOG00000042905;ENSRNOG00000045924;ENSRNOG00000050210	0.00549152
GO:0019885	antigen processing and presentation of endogenous peptide antigen via MHC class I	5	26	ENSRNOG00000029500;ENSRNOG00000030712;ENSRNOG00000038999;ENSRNOG00000042905;ENSRNOG00000050210	0.000384794	8	26	ENSRNOG00000000723;ENSRNOG00000016967;ENSRNOG00000017123;ENSRNOG00000029386;ENSRNOG00000029500;ENSRNOG00000042905;ENSRNOG00000045924;ENSRNOG00000050210	0.0132174
GO:0022900	electron transport chain	7	151	ENSRNOG00000005668;ENSRNOG00000012550;ENSRNOG00000023387;ENSRNOG00000029971;ENSRNOG00000031033;ENSRNOG00000031053;ENSRNOG00000049394	0.0124291	43	151	ENSRNOG00000003163;ENSRNOG00000004206;ENSRNOG00000005668;ENSRNOG00000005698;ENSRNOG00000006939;ENSRNOG00000007407;ENSRNOG00000009063;ENSRNOG00000009364;ENSRNOG00000010452;ENSRNOG00000010807;ENSRNOG00000011142;ENSRNOG00000012550;ENSRNOG00000012772;ENSRNOG00000013331;ENSRNOG00000014078;ENSRNOG00000015354;ENSRNOG00000015385;ENSRNOG00000015967;ENSRNOG00000016190;ENSRNOG00000016234;ENSRNOG00000016660;…	3.08472e-11
GO:0022904	respiratory electron transport chain	7	83	ENSRNOG00000005668;ENSRNOG00000012550;ENSRNOG00000023387;ENSRNOG00000029971;ENSRNOG00000031033;ENSRNOG00000031053;ENSRNOG00000049394	0.000744426	29	83	ENSRNOG00000003163;ENSRNOG00000005668;ENSRNOG00000005698;ENSRNOG00000006939;ENSRNOG00000007407;ENSRNOG00000009063;ENSRNOG00000009364;ENSRNOG00000010452;ENSRNOG00000012550;ENSRNOG00000013331;ENSRNOG00000014078;ENSRNOG00000015385;ENSRNOG00000016190;ENSRNOG00000016660;ENSRNOG00000017446;ENSRNOG00000018281;ENSRNOG00000018289;ENSRNOG00000018816;ENSRNOG00000023387;ENSRNOG00000024967;ENSRNOG00000029971;…	7.99214e-10
GO:0032781	positive regulation of ATPase activity	4	47	ENSRNOG00000006807;ENSRNOG00000008921;ENSRNOG00000016251;ENSRNOG00000019506	0.0205504	11	47	ENSRNOG00000002735;ENSRNOG00000006807;ENSRNOG00000007029;ENSRNOG00000007649;ENSRNOG00000008921;ENSRNOG00000009063;ENSRNOG00000013011;ENSRNOG00000018176;ENSRNOG00000021824;ENSRNOG00000049819;ENSRNOG00000052142	0.0186051
GO:0042773	ATP synthesis coupled electron transport	7	65	ENSRNOG00000005668;ENSRNOG00000012550;ENSRNOG00000023387;ENSRNOG00000029971;ENSRNOG00000031033;ENSRNOG00000031053;ENSRNOG00000049394	0.000317032	26	65	ENSRNOG00000003163;ENSRNOG00000005668;ENSRNOG00000006939;ENSRNOG00000007407;ENSRNOG00000009063;ENSRNOG00000009364;ENSRNOG00000010452;ENSRNOG00000012550;ENSRNOG00000013331;ENSRNOG00000014078;ENSRNOG00000015385;ENSRNOG00000016190;ENSRNOG00000016660;ENSRNOG00000017446;ENSRNOG00000018281;ENSRNOG00000018289;ENSRNOG00000018816;ENSRNOG00000023387;ENSRNOG00000024967;ENSRNOG00000029971;ENSRNOG00000030237;…	2.8302e-10
GO:0042775	mitochondrial ATP synthesis coupled electron transport	5	60	ENSRNOG00000005668;ENSRNOG00000012550;ENSRNOG00000023387;ENSRNOG00000031033;ENSRNOG00000049394	0.00713848	24	60	ENSRNOG00000003163;ENSRNOG00000005668;ENSRNOG00000006939;ENSRNOG00000007407;ENSRNOG00000009063;ENSRNOG00000009364;ENSRNOG00000010452;ENSRNOG00000012550;ENSRNOG00000013331;ENSRNOG00000014078;ENSRNOG00000015385;ENSRNOG00000016190;ENSRNOG00000016660;ENSRNOG00000017446;ENSRNOG00000018281;ENSRNOG00000018289;ENSRNOG00000018816;ENSRNOG00000023387;ENSRNOG00000024967;ENSRNOG00000030237;ENSRNOG00000031033;…	1.66903e-09
GO:0043043	peptide biosynthetic process	20	887	ENSRNOG00000000799;ENSRNOG00000004196;ENSRNOG00000005256;ENSRNOG00000009297;ENSRNOG00000011817;ENSRNOG00000013409;ENSRNOG00000015335;ENSRNOG00000016220;ENSRNOG00000016459;ENSRNOG00000016896;ENSRNOG00000018320;ENSRNOG00000018404;ENSRNOG00000019453;ENSRNOG00000025602;ENSRNOG00000028505;ENSRNOG00000028690;ENSRNOG00000033024;ENSRNOG00000033803;ENSRNOG00000033916;ENSRNOG00000037673	0.00537082	127	887	ENSRNOG00000000150;ENSRNOG00000000799;ENSRNOG00000000841;ENSRNOG00000000867;ENSRNOG00000001148;ENSRNOG00000001598;ENSRNOG00000001602;ENSRNOG00000001842;ENSRNOG00000002393;ENSRNOG00000002569;ENSRNOG00000002735;ENSRNOG00000002828;ENSRNOG00000004107;ENSRNOG00000004196;ENSRNOG00000004332;ENSRNOG00000005418;ENSRNOG00000006302;ENSRNOG00000006467;ENSRNOG00000006898;ENSRNOG00000006990;ENSRNOG00000006997;…	2.99308e-08
GO:0043604	amide biosynthetic process	23	982	ENSRNOG00000000799;ENSRNOG00000001517;ENSRNOG00000004196;ENSRNOG00000005256;ENSRNOG00000009297;ENSRNOG00000011817;ENSRNOG00000013304;ENSRNOG00000013409;ENSRNOG00000015335;ENSRNOG00000016220;ENSRNOG00000016459;ENSRNOG00000016896;ENSRNOG00000018320;ENSRNOG00000018404;ENSRNOG00000018755;ENSRNOG00000019453;ENSRNOG00000025602;ENSRNOG00000028505;ENSRNOG00000028690;ENSRNOG00000033024;ENSRNOG00000033803;…	0.00130625	142	982	ENSRNOG00000000150;ENSRNOG00000000658;ENSRNOG00000000799;ENSRNOG00000000841;ENSRNOG00000000867;ENSRNOG00000001148;ENSRNOG00000001598;ENSRNOG00000001602;ENSRNOG00000001842;ENSRNOG00000002393;ENSRNOG00000002569;ENSRNOG00000002735;ENSRNOG00000002828;ENSRNOG00000003223;ENSRNOG00000004107;ENSRNOG00000004172;ENSRNOG00000004196;ENSRNOG00000004332;ENSRNOG00000005418;ENSRNOG00000006302;ENSRNOG00000006331;…	1.50249e-09
GO:0044275	cellular carbohydrate catabolic process	3	27	ENSRNOG00000002218;ENSRNOG00000005861;ENSRNOG00000050585	0.037594	9	27	ENSRNOG00000002225;ENSRNOG00000006388;ENSRNOG00000011474;ENSRNOG00000015290;ENSRNOG00000016214;ENSRNOG00000020704;ENSRNOG00000047656;ENSRNOG00000050585;ENSRNOG00000051171	0.00420345
GO:0048002	antigen processing and presentation of peptide antigen	5	48	ENSRNOG00000029500;ENSRNOG00000030712;ENSRNOG00000038999;ENSRNOG00000042905;ENSRNOG00000050210	0.00308068	11	48	ENSRNOG00000000723;ENSRNOG00000016967;ENSRNOG00000017123;ENSRNOG00000027552;ENSRNOG00000029386;ENSRNOG00000029500;ENSRNOG00000039744;ENSRNOG00000042905;ENSRNOG00000045924;ENSRNOG00000050183;ENSRNOG00000050210	0.0219188
GO:0000096	sulfur amino acid metabolic process	4	32	ENSRNOG00000011351;ENSRNOG00000011573;ENSRNOG00000013409;ENSRNOG00000023856	0.00665723					7	32	ENSRNOG00000000158;ENSRNOG00000006302;ENSRNOG00000011200;ENSRNOG00000013409;ENSRNOG00000013704;ENSRNOG00000017777;ENSRNOG00000040120	0.045039
GO:0006536	glutamate metabolic process	3	29	ENSRNOG00000007069;ENSRNOG00000013409;ENSRNOG00000061876	0.0442909					7	29	ENSRNOG00000000903;ENSRNOG00000005266;ENSRNOG00000006302;ENSRNOG00000013409;ENSRNOG00000020879;ENSRNOG00000049560;ENSRNOG00000061876	0.0284637
GO:0006642	triglyceride mobilization	2	2	ENSRNOG00000005542;ENSRNOG00000019626	0.00342252					2	2	ENSRNOG00000005542;ENSRNOG00000019626	0.0480549
GO:0009064	glutamine family amino acid metabolic process	5	67	ENSRNOG00000007069;ENSRNOG00000013304;ENSRNOG00000013409;ENSRNOG00000020202;ENSRNOG00000061876	0.0100453					13	67	ENSRNOG00000000903;ENSRNOG00000005266;ENSRNOG00000006302;ENSRNOG00000008837;ENSRNOG00000013223;ENSRNOG00000013409;ENSRNOG00000013704;ENSRNOG00000020879;ENSRNOG00000046763;ENSRNOG00000049560;ENSRNOG00000051151;ENSRNOG00000057578;ENSRNOG00000061876	0.00643223
GO:0019748	secondary metabolic process	4	48	ENSRNOG00000005763;ENSRNOG00000005861;ENSRNOG00000020081;ENSRNOG00000050585	0.0218657					9	48	ENSRNOG00000001239;ENSRNOG00000005861;ENSRNOG00000016727;ENSRNOG00000017672;ENSRNOG00000019982;ENSRNOG00000020817;ENSRNOG00000046727;ENSRNOG00000050585;ENSRNOG00000056847	0.0406967
GO:0043456	regulation of pentose-phosphate shunt	2	2	ENSRNOG00000005861;ENSRNOG00000050585	0.00342252					2	2	ENSRNOG00000005861;ENSRNOG00000050585	0.0480549
GO:0070670	response to interleukin-4	4	30	ENSRNOG00000013304;ENSRNOG00000016896;ENSRNOG00000025602;ENSRNOG00000053468	0.00550711					8	30	ENSRNOG00000011668;ENSRNOG00000015206;ENSRNOG00000019458;ENSRNOG00000019834;ENSRNOG00000023334;ENSRNOG00000025602;ENSRNOG00000045636;ENSRNOG00000053468	0.00916915
GO:0071353	cellular response to interleukin-4	4	27	ENSRNOG00000013304;ENSRNOG00000016896;ENSRNOG00000025602;ENSRNOG00000053468	0.00381644					8	27	ENSRNOG00000011668;ENSRNOG00000015206;ENSRNOG00000019458;ENSRNOG00000019834;ENSRNOG00000023334;ENSRNOG00000025602;ENSRNOG00000045636;ENSRNOG00000053468	0.00492251
GO:1902031	regulation of NADP metabolic process	2	4	ENSRNOG00000005861;ENSRNOG00000050585	0.0132527					3	4	ENSRNOG00000005861;ENSRNOG00000009715;ENSRNOG00000050585	0.016269
GO:0000302	response to reactive oxygen species					38	208	ENSRNOG00000000053;ENSRNOG00000000571;ENSRNOG00000000604;ENSRNOG00000001783;ENSRNOG00000002115;ENSRNOG00000003977;ENSRNOG00000004172;ENSRNOG00000004332;ENSRNOG00000005195;ENSRNOG00000005418;ENSRNOG00000006589;ENSRNOG00000006675;ENSRNOG00000007649;ENSRNOG00000008015;ENSRNOG00000008364;ENSRNOG00000010558;ENSRNOG00000012081;ENSRNOG00000012458;ENSRNOG00000012473;ENSRNOG00000012772;ENSRNOG00000014117;…	9.61215e-05	29	208	ENSRNOG00000000053;ENSRNOG00000000604;ENSRNOG00000002292;ENSRNOG00000003977;ENSRNOG00000006067;ENSRNOG00000006589;ENSRNOG00000008364;ENSRNOG00000010558;ENSRNOG00000011039;ENSRNOG00000012458;ENSRNOG00000012772;ENSRNOG00000014117;ENSRNOG00000014525;ENSRNOG00000014604;ENSRNOG00000016885;ENSRNOG00000016907;ENSRNOG00000017765;ENSRNOG00000018184;ENSRNOG00000018237;ENSRNOG00000019587;ENSRNOG00000022485;…	0.00195372
GO:0000375	RNA splicing, via transesterification reactions					45	236	ENSRNOG00000000520;ENSRNOG00000000841;ENSRNOG00000000989;ENSRNOG00000001783;ENSRNOG00000002735;ENSRNOG00000002818;ENSRNOG00000002871;ENSRNOG00000004287;ENSRNOG00000005513;ENSRNOG00000006655;ENSRNOG00000007134;ENSRNOG00000007532;ENSRNOG00000007629;ENSRNOG00000007671;ENSRNOG00000007766;ENSRNOG00000007921;ENSRNOG00000008912;ENSRNOG00000009639;ENSRNOG00000009977;ENSRNOG00000010379;ENSRNOG00000010737;…	4.32225e-06	29	236	ENSRNOG00000000520;ENSRNOG00000002735;ENSRNOG00000002818;ENSRNOG00000002871;ENSRNOG00000004287;ENSRNOG00000005513;ENSRNOG00000006380;ENSRNOG00000006655;ENSRNOG00000009639;ENSRNOG00000011932;ENSRNOG00000013328;ENSRNOG00000013516;ENSRNOG00000014762;ENSRNOG00000015914;ENSRNOG00000015999;ENSRNOG00000016016;ENSRNOG00000019113;ENSRNOG00000020235;ENSRNOG00000020412;ENSRNOG00000020763;ENSRNOG00000024170;…	0.0114545
GO:0000377	RNA splicing, via transesterification reactions with bulged adenosine as nucleophile					45	236	ENSRNOG00000000520;ENSRNOG00000000841;ENSRNOG00000000989;ENSRNOG00000001783;ENSRNOG00000002735;ENSRNOG00000002818;ENSRNOG00000002871;ENSRNOG00000004287;ENSRNOG00000005513;ENSRNOG00000006655;ENSRNOG00000007134;ENSRNOG00000007532;ENSRNOG00000007629;ENSRNOG00000007671;ENSRNOG00000007766;ENSRNOG00000007921;ENSRNOG00000008912;ENSRNOG00000009639;ENSRNOG00000009977;ENSRNOG00000010379;ENSRNOG00000010737;…	4.32225e-06	29	236	ENSRNOG00000000520;ENSRNOG00000002735;ENSRNOG00000002818;ENSRNOG00000002871;ENSRNOG00000004287;ENSRNOG00000005513;ENSRNOG00000006380;ENSRNOG00000006655;ENSRNOG00000009639;ENSRNOG00000011932;ENSRNOG00000013328;ENSRNOG00000013516;ENSRNOG00000014762;ENSRNOG00000015914;ENSRNOG00000015999;ENSRNOG00000016016;ENSRNOG00000019113;ENSRNOG00000020235;ENSRNOG00000020412;ENSRNOG00000020763;ENSRNOG00000024170;…	0.0114545
GO:0000398	mRNA splicing, via spliceosome					45	236	ENSRNOG00000000520;ENSRNOG00000000841;ENSRNOG00000000989;ENSRNOG00000001783;ENSRNOG00000002735;ENSRNOG00000002818;ENSRNOG00000002871;ENSRNOG00000004287;ENSRNOG00000005513;ENSRNOG00000006655;ENSRNOG00000007134;ENSRNOG00000007532;ENSRNOG00000007629;ENSRNOG00000007671;ENSRNOG00000007766;ENSRNOG00000007921;ENSRNOG00000008912;ENSRNOG00000009639;ENSRNOG00000009977;ENSRNOG00000010379;ENSRNOG00000010737;…	4.32225e-06	29	236	ENSRNOG00000000520;ENSRNOG00000002735;ENSRNOG00000002818;ENSRNOG00000002871;ENSRNOG00000004287;ENSRNOG00000005513;ENSRNOG00000006380;ENSRNOG00000006655;ENSRNOG00000009639;ENSRNOG00000011932;ENSRNOG00000013328;ENSRNOG00000013516;ENSRNOG00000014762;ENSRNOG00000015914;ENSRNOG00000015999;ENSRNOG00000016016;ENSRNOG00000019113;ENSRNOG00000020235;ENSRNOG00000020412;ENSRNOG00000020763;ENSRNOG00000024170;…	0.0114545
GO:0001101	response to acid chemical					50	347	ENSRNOG00000000604;ENSRNOG00000000967;ENSRNOG00000001420;ENSRNOG00000001926;ENSRNOG00000002478;ENSRNOG00000002671;ENSRNOG00000002693;ENSRNOG00000003977;ENSRNOG00000004332;ENSRNOG00000004537;ENSRNOG00000005542;ENSRNOG00000006302;ENSRNOG00000006859;ENSRNOG00000007041;ENSRNOG00000007235;ENSRNOG00000008012;ENSRNOG00000008364;ENSRNOG00000008553;ENSRNOG00000009565;ENSRNOG00000009615;ENSRNOG00000010989;…	0.00173876	50	347	ENSRNOG00000000158;ENSRNOG00000000604;ENSRNOG00000000967;ENSRNOG00000001229;ENSRNOG00000001926;ENSRNOG00000002050;ENSRNOG00000002292;ENSRNOG00000002478;ENSRNOG00000003977;ENSRNOG00000004294;ENSRNOG00000004537;ENSRNOG00000005275;ENSRNOG00000005542;ENSRNOG00000006067;ENSRNOG00000006302;ENSRNOG00000006859;ENSRNOG00000007235;ENSRNOG00000008012;ENSRNOG00000008364;ENSRNOG00000008837;ENSRNOG00000009446;…	4.92608e-06
GO:0001666	response to hypoxia					44	301	ENSRNOG00000000053;ENSRNOG00000001420;ENSRNOG00000001582;ENSRNOG00000002636;ENSRNOG00000005195;ENSRNOG00000005614;ENSRNOG00000006589;ENSRNOG00000006675;ENSRNOG00000008012;ENSRNOG00000008364;ENSRNOG00000008553;ENSRNOG00000009615;ENSRNOG00000010944;ENSRNOG00000012473;ENSRNOG00000012582;ENSRNOG00000012999;ENSRNOG00000013271;ENSRNOG00000013766;ENSRNOG00000014117;ENSRNOG00000014525;ENSRNOG00000015206;…	0.00302645	38	301	ENSRNOG00000000053;ENSRNOG00000002636;ENSRNOG00000006589;ENSRNOG00000007545;ENSRNOG00000007763;ENSRNOG00000008012;ENSRNOG00000008364;ENSRNOG00000009615;ENSRNOG00000010944;ENSRNOG00000012999;ENSRNOG00000013180;ENSRNOG00000013766;ENSRNOG00000014117;ENSRNOG00000014525;ENSRNOG00000015206;ENSRNOG00000016166;ENSRNOG00000017777;ENSRNOG00000019282;ENSRNOG00000019422;ENSRNOG00000019428;ENSRNOG00000019522;…	0.0015965
GO:0001676	long-chain fatty acid metabolic process					15	66	ENSRNOG00000008988;ENSRNOG00000010128;ENSRNOG00000010580;ENSRNOG00000012458;ENSRNOG00000014254;ENSRNOG00000014508;ENSRNOG00000019180;ENSRNOG00000020480;ENSRNOG00000021924;ENSRNOG00000022268;ENSRNOG00000028891;ENSRNOG00000031004;ENSRNOG00000033164;ENSRNOG00000048297;ENSRNOG00000048949	0.00488959	15	66	ENSRNOG00000008988;ENSRNOG00000010128;ENSRNOG00000010580;ENSRNOG00000010633;ENSRNOG00000012458;ENSRNOG00000018237;ENSRNOG00000019180;ENSRNOG00000019626;ENSRNOG00000020480;ENSRNOG00000020817;ENSRNOG00000021924;ENSRNOG00000022268;ENSRNOG00000028891;ENSRNOG00000033164;ENSRNOG00000048949	0.000526237
GO:0001678	cellular glucose homeostasis					21	137	ENSRNOG00000000967;ENSRNOG00000001420;ENSRNOG00000002671;ENSRNOG00000002693;ENSRNOG00000005257;ENSRNOG00000006302;ENSRNOG00000009488;ENSRNOG00000009884;ENSRNOG00000014256;ENSRNOG00000016723;ENSRNOG00000017808;ENSRNOG00000018903;ENSRNOG00000019113;ENSRNOG00000019302;ENSRNOG00000019587;ENSRNOG00000019752;ENSRNOG00000020990;ENSRNOG00000025053;ENSRNOG00000028616;ENSRNOG00000055079;ENSRNOG00000061527	0.0483613	18	137	ENSRNOG00000000967;ENSRNOG00000005257;ENSRNOG00000006302;ENSRNOG00000008578;ENSRNOG00000009488;ENSRNOG00000009882;ENSRNOG00000013409;ENSRNOG00000013507;ENSRNOG00000016122;ENSRNOG00000018233;ENSRNOG00000019113;ENSRNOG00000019587;ENSRNOG00000020679;ENSRNOG00000025053;ENSRNOG00000028616;ENSRNOG00000047287;ENSRNOG00000048874;ENSRNOG00000055079	0.0398406
GO:0002237	response to molecule of bacterial origin					42	330	ENSRNOG00000000604;ENSRNOG00000001285;ENSRNOG00000001889;ENSRNOG00000001926;ENSRNOG00000002520;ENSRNOG00000002991;ENSRNOG00000003709;ENSRNOG00000004649;ENSRNOG00000004726;ENSRNOG00000005542;ENSRNOG00000006589;ENSRNOG00000007041;ENSRNOG00000007743;ENSRNOG00000008012;ENSRNOG00000008015;ENSRNOG00000008672;ENSRNOG00000009568;ENSRNOG00000012840;ENSRNOG00000013954;ENSRNOG00000014525;ENSRNOG00000014779;…	0.0396748	39	330	ENSRNOG00000000604;ENSRNOG00000001285;ENSRNOG00000001926;ENSRNOG00000002520;ENSRNOG00000004100;ENSRNOG00000004726;ENSRNOG00000005542;ENSRNOG00000006589;ENSRNOG00000008012;ENSRNOG00000008672;ENSRNOG00000008837;ENSRNOG00000009568;ENSRNOG00000010799;ENSRNOG00000011039;ENSRNOG00000013704;ENSRNOG00000013954;ENSRNOG00000014525;ENSRNOG00000014532;ENSRNOG00000015206;ENSRNOG00000017195;ENSRNOG00000017869;…	0.00437398
GO:0002526	acute inflammatory response					20	103	ENSRNOG00000000053;ENSRNOG00000002783;ENSRNOG00000003500;ENSRNOG00000004649;ENSRNOG00000006589;ENSRNOG00000007457;ENSRNOG00000008193;ENSRNOG00000015139;ENSRNOG00000016967;ENSRNOG00000018289;ENSRNOG00000018740;ENSRNOG00000019113;ENSRNOG00000019742;ENSRNOG00000030387;ENSRNOG00000030715;ENSRNOG00000042821;ENSRNOG00000046449;ENSRNOG00000046799;ENSRNOG00000050305;ENSRNOG00000056076	0.00492348	18	103	ENSRNOG00000000053;ENSRNOG00000001050;ENSRNOG00000002783;ENSRNOG00000006589;ENSRNOG00000007457;ENSRNOG00000008837;ENSRNOG00000014532;ENSRNOG00000015139;ENSRNOG00000016967;ENSRNOG00000017381;ENSRNOG00000018740;ENSRNOG00000019113;ENSRNOG00000019742;ENSRNOG00000020679;ENSRNOG00000030715;ENSRNOG00000042821;ENSRNOG00000046834;ENSRNOG00000056076	0.00245017
GO:0002931	response to ischemia					12	51	ENSRNOG00000003147;ENSRNOG00000010452;ENSRNOG00000010558;ENSRNOG00000010944;ENSRNOG00000012582;ENSRNOG00000014522;ENSRNOG00000014525;ENSRNOG00000015385;ENSRNOG00000020254;ENSRNOG00000033498;ENSRNOG00000049132;ENSRNOG00000050647	0.0116762	10	51	ENSRNOG00000003147;ENSRNOG00000006067;ENSRNOG00000010558;ENSRNOG00000010944;ENSRNOG00000014522;ENSRNOG00000014525;ENSRNOG00000019422;ENSRNOG00000020254;ENSRNOG00000033498;ENSRNOG00000049132	0.0203596
GO:0005975	carbohydrate metabolic process					81	507	ENSRNOG00000000165;ENSRNOG00000000658;ENSRNOG00000000796;ENSRNOG00000000913;ENSRNOG00000001189;ENSRNOG00000001269;ENSRNOG00000002185;ENSRNOG00000002225;ENSRNOG00000002642;ENSRNOG00000003712;ENSRNOG00000003745;ENSRNOG00000004172;ENSRNOG00000006302;ENSRNOG00000006388;ENSRNOG00000006460;ENSRNOG00000006589;ENSRNOG00000006622;ENSRNOG00000006807;ENSRNOG00000007041;ENSRNOG00000007895;ENSRNOG00000008047;…	3.28116e-07	70	507	ENSRNOG00000000165;ENSRNOG00000000658;ENSRNOG00000000796;ENSRNOG00000001269;ENSRNOG00000001973;ENSRNOG00000002615;ENSRNOG00000002642;ENSRNOG00000005358;ENSRNOG00000005861;ENSRNOG00000006302;ENSRNOG00000006388;ENSRNOG00000006589;ENSRNOG00000006622;ENSRNOG00000007570;ENSRNOG00000007895;ENSRNOG00000008047;ENSRNOG00000008079;ENSRNOG00000008095;ENSRNOG00000008103;ENSRNOG00000008377;ENSRNOG00000008648;…	1.08274e-07
GO:0005976	polysaccharide metabolic process					18	92	ENSRNOG00000001269;ENSRNOG00000002642;ENSRNOG00000006388;ENSRNOG00000008047;ENSRNOG00000009615;ENSRNOG00000009845;ENSRNOG00000011474;ENSRNOG00000013963;ENSRNOG00000014597;ENSRNOG00000016214;ENSRNOG00000018494;ENSRNOG00000019014;ENSRNOG00000020254;ENSRNOG00000036692;ENSRNOG00000047656;ENSRNOG00000051171;ENSRNOG00000059753;ENSRNOG00000061527	0.00811439	16	92	ENSRNOG00000001269;ENSRNOG00000002642;ENSRNOG00000006388;ENSRNOG00000008047;ENSRNOG00000008079;ENSRNOG00000009615;ENSRNOG00000009845;ENSRNOG00000013963;ENSRNOG00000018494;ENSRNOG00000018677;ENSRNOG00000020254;ENSRNOG00000024886;ENSRNOG00000028629;ENSRNOG00000047656;ENSRNOG00000051171;ENSRNOG00000059753	0.0054615
GO:0005977	glycogen metabolic process					17	62	ENSRNOG00000001269;ENSRNOG00000002642;ENSRNOG00000006388;ENSRNOG00000008047;ENSRNOG00000009615;ENSRNOG00000009845;ENSRNOG00000011474;ENSRNOG00000013963;ENSRNOG00000014597;ENSRNOG00000016214;ENSRNOG00000018494;ENSRNOG00000020254;ENSRNOG00000036692;ENSRNOG00000047656;ENSRNOG00000051171;ENSRNOG00000059753;ENSRNOG00000061527	0.000238984	15	62	ENSRNOG00000001269;ENSRNOG00000002642;ENSRNOG00000006388;ENSRNOG00000008047;ENSRNOG00000008079;ENSRNOG00000009615;ENSRNOG00000009845;ENSRNOG00000013963;ENSRNOG00000018494;ENSRNOG00000018677;ENSRNOG00000020254;ENSRNOG00000028629;ENSRNOG00000047656;ENSRNOG00000051171;ENSRNOG00000059753	0.000252775
GO:0005978	glycogen biosynthetic process					10	38	ENSRNOG00000002642;ENSRNOG00000009615;ENSRNOG00000009845;ENSRNOG00000011474;ENSRNOG00000014597;ENSRNOG00000016214;ENSRNOG00000018494;ENSRNOG00000020254;ENSRNOG00000059753;ENSRNOG00000061527	0.0123895	8	38	ENSRNOG00000002642;ENSRNOG00000009615;ENSRNOG00000009845;ENSRNOG00000018494;ENSRNOG00000018677;ENSRNOG00000020254;ENSRNOG00000028629;ENSRNOG00000059753	0.0341298
GO:0005996	monosaccharide metabolic process					49	214	ENSRNOG00000000165;ENSRNOG00000000658;ENSRNOG00000000796;ENSRNOG00000001189;ENSRNOG00000002185;ENSRNOG00000003712;ENSRNOG00000003745;ENSRNOG00000004172;ENSRNOG00000006302;ENSRNOG00000006622;ENSRNOG00000006807;ENSRNOG00000007895;ENSRNOG00000008047;ENSRNOG00000008377;ENSRNOG00000009565;ENSRNOG00000009615;ENSRNOG00000009845;ENSRNOG00000009889;ENSRNOG00000010196;ENSRNOG00000011474;ENSRNOG00000014168;…	3.29617e-09	40	214	ENSRNOG00000000165;ENSRNOG00000000658;ENSRNOG00000000796;ENSRNOG00000001973;ENSRNOG00000002615;ENSRNOG00000005358;ENSRNOG00000006302;ENSRNOG00000006622;ENSRNOG00000007895;ENSRNOG00000008047;ENSRNOG00000008095;ENSRNOG00000008377;ENSRNOG00000009565;ENSRNOG00000009615;ENSRNOG00000009845;ENSRNOG00000009889;ENSRNOG00000009994;ENSRNOG00000014168;ENSRNOG00000014522;ENSRNOG00000014565;ENSRNOG00000015439;…	8.94637e-08
GO:0006006	glucose metabolic process					40	167	ENSRNOG00000000165;ENSRNOG00000000658;ENSRNOG00000000796;ENSRNOG00000001189;ENSRNOG00000002185;ENSRNOG00000003712;ENSRNOG00000003745;ENSRNOG00000004172;ENSRNOG00000006622;ENSRNOG00000007895;ENSRNOG00000008047;ENSRNOG00000008377;ENSRNOG00000009565;ENSRNOG00000009615;ENSRNOG00000009845;ENSRNOG00000009889;ENSRNOG00000011474;ENSRNOG00000014254;ENSRNOG00000014522;ENSRNOG00000014565;ENSRNOG00000014597;…	4.13084e-08	30	167	ENSRNOG00000000165;ENSRNOG00000000658;ENSRNOG00000000796;ENSRNOG00000006622;ENSRNOG00000007895;ENSRNOG00000008047;ENSRNOG00000008095;ENSRNOG00000008377;ENSRNOG00000009565;ENSRNOG00000009615;ENSRNOG00000009845;ENSRNOG00000009889;ENSRNOG00000009994;ENSRNOG00000014522;ENSRNOG00000014565;ENSRNOG00000015518;ENSRNOG00000016349;ENSRNOG00000017523;ENSRNOG00000018677;ENSRNOG00000019372;ENSRNOG00000020254;…	1.53648e-05
GO:0006073	cellular glucan metabolic process					17	62	ENSRNOG00000001269;ENSRNOG00000002642;ENSRNOG00000006388;ENSRNOG00000008047;ENSRNOG00000009615;ENSRNOG00000009845;ENSRNOG00000011474;ENSRNOG00000013963;ENSRNOG00000014597;ENSRNOG00000016214;ENSRNOG00000018494;ENSRNOG00000020254;ENSRNOG00000036692;ENSRNOG00000047656;ENSRNOG00000051171;ENSRNOG00000059753;ENSRNOG00000061527	0.000238984	15	62	ENSRNOG00000001269;ENSRNOG00000002642;ENSRNOG00000006388;ENSRNOG00000008047;ENSRNOG00000008079;ENSRNOG00000009615;ENSRNOG00000009845;ENSRNOG00000013963;ENSRNOG00000018494;ENSRNOG00000018677;ENSRNOG00000020254;ENSRNOG00000028629;ENSRNOG00000047656;ENSRNOG00000051171;ENSRNOG00000059753	0.000252775
GO:0006084	acetyl-CoA metabolic process					16	29	ENSRNOG00000000658;ENSRNOG00000004172;ENSRNOG00000006947;ENSRNOG00000007895;ENSRNOG00000008798;ENSRNOG00000009565;ENSRNOG00000011861;ENSRNOG00000013376;ENSRNOG00000014522;ENSRNOG00000016552;ENSRNOG00000016924;ENSRNOG00000018755;ENSRNOG00000020696;ENSRNOG00000029993;ENSRNOG00000034013;ENSRNOG00000045636	9.4552e-09	17	29	ENSRNOG00000000658;ENSRNOG00000006947;ENSRNOG00000007895;ENSRNOG00000008798;ENSRNOG00000009565;ENSRNOG00000009994;ENSRNOG00000011612;ENSRNOG00000013376;ENSRNOG00000014522;ENSRNOG00000016552;ENSRNOG00000016924;ENSRNOG00000018755;ENSRNOG00000020696;ENSRNOG00000029993;ENSRNOG00000034013;ENSRNOG00000045636;ENSRNOG00000049604	2.29078e-11
GO:0006085	acetyl-CoA biosynthetic process					7	17	ENSRNOG00000004172;ENSRNOG00000006947;ENSRNOG00000007895;ENSRNOG00000009565;ENSRNOG00000014522;ENSRNOG00000016924;ENSRNOG00000018755	0.00474382	7	17	ENSRNOG00000006947;ENSRNOG00000007895;ENSRNOG00000009565;ENSRNOG00000009994;ENSRNOG00000014522;ENSRNOG00000016924;ENSRNOG00000018755	0.00142839
GO:0006094	gluconeogenesis					19	62	ENSRNOG00000000796;ENSRNOG00000001189;ENSRNOG00000003712;ENSRNOG00000003745;ENSRNOG00000004172;ENSRNOG00000006622;ENSRNOG00000009845;ENSRNOG00000015290;ENSRNOG00000016348;ENSRNOG00000016349;ENSRNOG00000017801;ENSRNOG00000020254;ENSRNOG00000023150;ENSRNOG00000028616;ENSRNOG00000051171;ENSRNOG00000051592;ENSRNOG00000056457;ENSRNOG00000058249;ENSRNOG00000061527	1.4001e-05	12	62	ENSRNOG00000000796;ENSRNOG00000006622;ENSRNOG00000009845;ENSRNOG00000015518;ENSRNOG00000016349;ENSRNOG00000019372;ENSRNOG00000020254;ENSRNOG00000023150;ENSRNOG00000028616;ENSRNOG00000051171;ENSRNOG00000056457;ENSRNOG00000058249	0.0098613
GO:0006101	citrate metabolic process					8	31	ENSRNOG00000003163;ENSRNOG00000005686;ENSRNOG00000007895;ENSRNOG00000013271;ENSRNOG00000013331;ENSRNOG00000016924;ENSRNOG00000023587;ENSRNOG00000055572	0.037667	8	31	ENSRNOG00000005849;ENSRNOG00000007895;ENSRNOG00000008103;ENSRNOG00000009994;ENSRNOG00000013949;ENSRNOG00000016924;ENSRNOG00000017481;ENSRNOG00000023587	0.0110401
GO:0006109	regulation of carbohydrate metabolic process					26	137	ENSRNOG00000000165;ENSRNOG00000000658;ENSRNOG00000000796;ENSRNOG00000001189;ENSRNOG00000002225;ENSRNOG00000003712;ENSRNOG00000004172;ENSRNOG00000006589;ENSRNOG00000006622;ENSRNOG00000008047;ENSRNOG00000009565;ENSRNOG00000009615;ENSRNOG00000009845;ENSRNOG00000011474;ENSRNOG00000014522;ENSRNOG00000014565;ENSRNOG00000014597;ENSRNOG00000016349;ENSRNOG00000019742;ENSRNOG00000036692;ENSRNOG00000049497;…	0.00121263	20	137	ENSRNOG00000000165;ENSRNOG00000000658;ENSRNOG00000000796;ENSRNOG00000005861;ENSRNOG00000006589;ENSRNOG00000006622;ENSRNOG00000008047;ENSRNOG00000009565;ENSRNOG00000009615;ENSRNOG00000009845;ENSRNOG00000014522;ENSRNOG00000014565;ENSRNOG00000016349;ENSRNOG00000018677;ENSRNOG00000019742;ENSRNOG00000028629;ENSRNOG00000048874;ENSRNOG00000050585;ENSRNOG00000056076;ENSRNOG00000056457	0.00954309
GO:0006112	energy reserve metabolic process					17	68	ENSRNOG00000001269;ENSRNOG00000002642;ENSRNOG00000006388;ENSRNOG00000008047;ENSRNOG00000009615;ENSRNOG00000009845;ENSRNOG00000011474;ENSRNOG00000013963;ENSRNOG00000014597;ENSRNOG00000016214;ENSRNOG00000018494;ENSRNOG00000020254;ENSRNOG00000036692;ENSRNOG00000047656;ENSRNOG00000051171;ENSRNOG00000059753;ENSRNOG00000061527	0.00074486	15	68	ENSRNOG00000001269;ENSRNOG00000002642;ENSRNOG00000006388;ENSRNOG00000008047;ENSRNOG00000008079;ENSRNOG00000009615;ENSRNOG00000009845;ENSRNOG00000013963;ENSRNOG00000018494;ENSRNOG00000018677;ENSRNOG00000020254;ENSRNOG00000028629;ENSRNOG00000047656;ENSRNOG00000051171;ENSRNOG00000059753	0.000716923
GO:0006139	nucleobase-containing compound metabolic process					479	4747	ENSRNOG00000000064;ENSRNOG00000000397;ENSRNOG00000000461;ENSRNOG00000000467;ENSRNOG00000000488;ENSRNOG00000000520;ENSRNOG00000000521;ENSRNOG00000000604;ENSRNOG00000000658;ENSRNOG00000000808;ENSRNOG00000000815;ENSRNOG00000000841;ENSRNOG00000000867;ENSRNOG00000000909;ENSRNOG00000000923;ENSRNOG00000000989;ENSRNOG00000001030;ENSRNOG00000001139;ENSRNOG00000001172;ENSRNOG00000001189;ENSRNOG00000001524;…	3.04859e-06	354	4747	ENSRNOG00000000064;ENSRNOG00000000397;ENSRNOG00000000422;ENSRNOG00000000461;ENSRNOG00000000520;ENSRNOG00000000521;ENSRNOG00000000604;ENSRNOG00000000658;ENSRNOG00000001030;ENSRNOG00000001203;ENSRNOG00000001314;ENSRNOG00000001647;ENSRNOG00000001797;ENSRNOG00000001967;ENSRNOG00000002186;ENSRNOG00000002292;ENSRNOG00000002341;ENSRNOG00000002389;ENSRNOG00000002393;ENSRNOG00000002408;ENSRNOG00000002456;…	0.0118762
GO:0006140	regulation of nucleotide metabolic process					16	84	ENSRNOG00000004172;ENSRNOG00000006589;ENSRNOG00000009063;ENSRNOG00000009565;ENSRNOG00000009715;ENSRNOG00000010558;ENSRNOG00000015385;ENSRNOG00000018289;ENSRNOG00000019742;ENSRNOG00000042903;ENSRNOG00000049497;ENSRNOG00000050585;ENSRNOG00000056076;ENSRNOG00000056457;ENSRNOG00000058249;ENSRNOG00000061527	0.0185509	13	84	ENSRNOG00000003302;ENSRNOG00000005861;ENSRNOG00000006589;ENSRNOG00000009565;ENSRNOG00000009715;ENSRNOG00000010558;ENSRNOG00000019742;ENSRNOG00000034242;ENSRNOG00000047781;ENSRNOG00000050585;ENSRNOG00000056076;ENSRNOG00000056457;ENSRNOG00000058249	0.0355569
GO:0006164	purine nucleotide biosynthetic process					47	254	ENSRNOG00000000064;ENSRNOG00000000658;ENSRNOG00000002671;ENSRNOG00000002693;ENSRNOG00000002928;ENSRNOG00000003626;ENSRNOG00000004172;ENSRNOG00000006331;ENSRNOG00000006589;ENSRNOG00000006807;ENSRNOG00000006947;ENSRNOG00000007235;ENSRNOG00000007895;ENSRNOG00000008572;ENSRNOG00000009565;ENSRNOG00000010580;ENSRNOG00000012325;ENSRNOG00000014522;ENSRNOG00000014625;ENSRNOG00000014684;ENSRNOG00000015290;…	5.63775e-06	35	254	ENSRNOG00000000064;ENSRNOG00000000658;ENSRNOG00000003302;ENSRNOG00000006589;ENSRNOG00000006947;ENSRNOG00000007235;ENSRNOG00000007895;ENSRNOG00000008572;ENSRNOG00000009565;ENSRNOG00000009994;ENSRNOG00000010580;ENSRNOG00000010633;ENSRNOG00000012325;ENSRNOG00000014522;ENSRNOG00000014625;ENSRNOG00000015320;ENSRNOG00000016924;ENSRNOG00000018755;ENSRNOG00000019180;ENSRNOG00000019742;ENSRNOG00000019918;…	0.00059514
GO:0006396	RNA processing					108	746	ENSRNOG00000000520;ENSRNOG00000000841;ENSRNOG00000000989;ENSRNOG00000001783;ENSRNOG00000002580;ENSRNOG00000002618;ENSRNOG00000002735;ENSRNOG00000002818;ENSRNOG00000002871;ENSRNOG00000003049;ENSRNOG00000003497;ENSRNOG00000003689;ENSRNOG00000003714;ENSRNOG00000004247;ENSRNOG00000004287;ENSRNOG00000004301;ENSRNOG00000004332;ENSRNOG00000004515;ENSRNOG00000004827;ENSRNOG00000005184;ENSRNOG00000005257;…	2.92866e-07	80	746	ENSRNOG00000000520;ENSRNOG00000001203;ENSRNOG00000002618;ENSRNOG00000002695;ENSRNOG00000002735;ENSRNOG00000002818;ENSRNOG00000002871;ENSRNOG00000003392;ENSRNOG00000004287;ENSRNOG00000004301;ENSRNOG00000004515;ENSRNOG00000004813;ENSRNOG00000005257;ENSRNOG00000005513;ENSRNOG00000006355;ENSRNOG00000006380;ENSRNOG00000006420;ENSRNOG00000006652;ENSRNOG00000006655;ENSRNOG00000007838;ENSRNOG00000008551;…	0.000192275
GO:0006397	mRNA processing					70	369	ENSRNOG00000000520;ENSRNOG00000000841;ENSRNOG00000000989;ENSRNOG00000001783;ENSRNOG00000002735;ENSRNOG00000002818;ENSRNOG00000002871;ENSRNOG00000003497;ENSRNOG00000003689;ENSRNOG00000004287;ENSRNOG00000004827;ENSRNOG00000005257;ENSRNOG00000005513;ENSRNOG00000006652;ENSRNOG00000006655;ENSRNOG00000006997;ENSRNOG00000007134;ENSRNOG00000007315;ENSRNOG00000007532;ENSRNOG00000007629;ENSRNOG00000007671;…	2.93612e-09	45	369	ENSRNOG00000000520;ENSRNOG00000002735;ENSRNOG00000002818;ENSRNOG00000002871;ENSRNOG00000004287;ENSRNOG00000005257;ENSRNOG00000005513;ENSRNOG00000006355;ENSRNOG00000006380;ENSRNOG00000006420;ENSRNOG00000006652;ENSRNOG00000006655;ENSRNOG00000008639;ENSRNOG00000009639;ENSRNOG00000009960;ENSRNOG00000010799;ENSRNOG00000011932;ENSRNOG00000012928;ENSRNOG00000013328;ENSRNOG00000013516;ENSRNOG00000014762;…	0.000893733
GO:0006417	regulation of translation					38	260	ENSRNOG00000000150;ENSRNOG00000000799;ENSRNOG00000000841;ENSRNOG00000001598;ENSRNOG00000001602;ENSRNOG00000002393;ENSRNOG00000002735;ENSRNOG00000002828;ENSRNOG00000005418;ENSRNOG00000006990;ENSRNOG00000006997;ENSRNOG00000009152;ENSRNOG00000009615;ENSRNOG00000010218;ENSRNOG00000010352;ENSRNOG00000011910;ENSRNOG00000012582;ENSRNOG00000012954;ENSRNOG00000013271;ENSRNOG00000015385;ENSRNOG00000016478;…	0.0069877	31	260	ENSRNOG00000000150;ENSRNOG00000000799;ENSRNOG00000001050;ENSRNOG00000001738;ENSRNOG00000002292;ENSRNOG00000002393;ENSRNOG00000002735;ENSRNOG00000005275;ENSRNOG00000005849;ENSRNOG00000009152;ENSRNOG00000009446;ENSRNOG00000009615;ENSRNOG00000010218;ENSRNOG00000011728;ENSRNOG00000011910;ENSRNOG00000012954;ENSRNOG00000015999;ENSRNOG00000016580;ENSRNOG00000017418;ENSRNOG00000019027;ENSRNOG00000019634;…	0.0123487
GO:0006457	protein folding					40	152	ENSRNOG00000000150;ENSRNOG00000000473;ENSRNOG00000000796;ENSRNOG00000000902;ENSRNOG00000000923;ENSRNOG00000002609;ENSRNOG00000002642;ENSRNOG00000003763;ENSRNOG00000003983;ENSRNOG00000005418;ENSRNOG00000007029;ENSRNOG00000009920;ENSRNOG00000009934;ENSRNOG00000010352;ENSRNOG00000010558;ENSRNOG00000012106;ENSRNOG00000012357;ENSRNOG00000012366;ENSRNOG00000012985;ENSRNOG00000013011;ENSRNOG00000014525;…	2.37338e-09	27	152	ENSRNOG00000000150;ENSRNOG00000000796;ENSRNOG00000000902;ENSRNOG00000002642;ENSRNOG00000007029;ENSRNOG00000009934;ENSRNOG00000010558;ENSRNOG00000012106;ENSRNOG00000012366;ENSRNOG00000014525;ENSRNOG00000014762;ENSRNOG00000014901;ENSRNOG00000016460;ENSRNOG00000017781;ENSRNOG00000019090;ENSRNOG00000019506;ENSRNOG00000019834;ENSRNOG00000019891;ENSRNOG00000021317;ENSRNOG00000021824;ENSRNOG00000023546;…	6.30555e-05
GO:0006458	'de novo' protein folding					10	32	ENSRNOG00000000902;ENSRNOG00000009920;ENSRNOG00000013011;ENSRNOG00000014525;ENSRNOG00000014901;ENSRNOG00000017781;ENSRNOG00000021317;ENSRNOG00000021824;ENSRNOG00000050647;ENSRNOG00000060107	0.00357823	7	32	ENSRNOG00000000902;ENSRNOG00000014525;ENSRNOG00000014901;ENSRNOG00000017781;ENSRNOG00000021317;ENSRNOG00000021824;ENSRNOG00000034093	0.045039
GO:0006508	proteolysis					180	1603	ENSRNOG00000000527;ENSRNOG00000000604;ENSRNOG00000000909;ENSRNOG00000001420;ENSRNOG00000001598;ENSRNOG00000001602;ENSRNOG00000001607;ENSRNOG00000001719;ENSRNOG00000001806;ENSRNOG00000001829;ENSRNOG00000002358;ENSRNOG00000002609;ENSRNOG00000002783;ENSRNOG00000003289;ENSRNOG00000003430;ENSRNOG00000003563;ENSRNOG00000004006;ENSRNOG00000004107;ENSRNOG00000004130;ENSRNOG00000004464;ENSRNOG00000004637;…	0.000241686	149	1603	ENSRNOG00000000438;ENSRNOG00000000527;ENSRNOG00000000604;ENSRNOG00000001293;ENSRNOG00000002341;ENSRNOG00000002358;ENSRNOG00000002783;ENSRNOG00000003261;ENSRNOG00000003289;ENSRNOG00000003430;ENSRNOG00000003563;ENSRNOG00000004100;ENSRNOG00000004464;ENSRNOG00000004725;ENSRNOG00000005257;ENSRNOG00000005276;ENSRNOG00000005310;ENSRNOG00000005577;ENSRNOG00000006067;ENSRNOG00000006302;ENSRNOG00000006345;…	0.000106591
GO:0006517	protein deglycosylation					6	13	ENSRNOG00000006143;ENSRNOG00000018289;ENSRNOG00000019299;ENSRNOG00000023910;ENSRNOG00000028358;ENSRNOG00000061779	0.00611428	5	13	ENSRNOG00000015439;ENSRNOG00000019299;ENSRNOG00000023910;ENSRNOG00000055365;ENSRNOG00000061779	0.0151937
GO:0006575	cellular modified amino acid metabolic process					30	143	ENSRNOG00000001889;ENSRNOG00000002115;ENSRNOG00000002609;ENSRNOG00000003763;ENSRNOG00000006302;ENSRNOG00000006779;ENSRNOG00000007743;ENSRNOG00000008553;ENSRNOG00000008798;ENSRNOG00000009845;ENSRNOG00000011781;ENSRNOG00000014254;ENSRNOG00000014387;ENSRNOG00000016097;ENSRNOG00000016275;ENSRNOG00000016349;ENSRNOG00000018289;ENSRNOG00000018964;ENSRNOG00000019982;ENSRNOG00000020947;ENSRNOG00000026211;…	6.11073e-05	27	143	ENSRNOG00000001967;ENSRNOG00000005275;ENSRNOG00000006302;ENSRNOG00000006779;ENSRNOG00000007763;ENSRNOG00000008798;ENSRNOG00000008837;ENSRNOG00000009845;ENSRNOG00000009878;ENSRNOG00000011039;ENSRNOG00000011200;ENSRNOG00000011781;ENSRNOG00000013409;ENSRNOG00000014915;ENSRNOG00000016097;ENSRNOG00000016349;ENSRNOG00000017777;ENSRNOG00000018237;ENSRNOG00000018964;ENSRNOG00000019982;ENSRNOG00000020947;…	2.07805e-05
GO:0006605	protein targeting					38	220	ENSRNOG00000000164;ENSRNOG00000000314;ENSRNOG00000001420;ENSRNOG00000001436;ENSRNOG00000002225;ENSRNOG00000003747;ENSRNOG00000004637;ENSRNOG00000005203;ENSRNOG00000006399;ENSRNOG00000006539;ENSRNOG00000007040;ENSRNOG00000009057;ENSRNOG00000009063;ENSRNOG00000009920;ENSRNOG00000011952;ENSRNOG00000012001;ENSRNOG00000013498;ENSRNOG00000014525;ENSRNOG00000015385;ENSRNOG00000016596;ENSRNOG00000018164;…	0.000318533	27	220	ENSRNOG00000000096;ENSRNOG00000000164;ENSRNOG00000001436;ENSRNOG00000002615;ENSRNOG00000003747;ENSRNOG00000004072;ENSRNOG00000005358;ENSRNOG00000006345;ENSRNOG00000006539;ENSRNOG00000007040;ENSRNOG00000007892;ENSRNOG00000008222;ENSRNOG00000009057;ENSRNOG00000012693;ENSRNOG00000013743;ENSRNOG00000014525;ENSRNOG00000018677;ENSRNOG00000019891;ENSRNOG00000020298;ENSRNOG00000025156;ENSRNOG00000029049;…	0.0160537
GO:0006606	protein import into nucleus					20	128	ENSRNOG00000000521;ENSRNOG00000000796;ENSRNOG00000001173;ENSRNOG00000004700;ENSRNOG00000006913;ENSRNOG00000007665;ENSRNOG00000010235;ENSRNOG00000010989;ENSRNOG00000012999;ENSRNOG00000014448;ENSRNOG00000018903;ENSRNOG00000019407;ENSRNOG00000019618;ENSRNOG00000019638;ENSRNOG00000019742;ENSRNOG00000020298;ENSRNOG00000020660;ENSRNOG00000021201;ENSRNOG00000038881;ENSRNOG00000054890	0.0481085	17	128	ENSRNOG00000000521;ENSRNOG00000000796;ENSRNOG00000001173;ENSRNOG00000004700;ENSRNOG00000007665;ENSRNOG00000009882;ENSRNOG00000010235;ENSRNOG00000012999;ENSRNOG00000014448;ENSRNOG00000015380;ENSRNOG00000019618;ENSRNOG00000019638;ENSRNOG00000019742;ENSRNOG00000020298;ENSRNOG00000028629;ENSRNOG00000031420;ENSRNOG00000048874	0.0439073
GO:0006633	fatty acid biosynthetic process					38	106	ENSRNOG00000000658;ENSRNOG00000001142;ENSRNOG00000002478;ENSRNOG00000002642;ENSRNOG00000003223;ENSRNOG00000003228;ENSRNOG00000004649;ENSRNOG00000006331;ENSRNOG00000006508;ENSRNOG00000008245;ENSRNOG00000008377;ENSRNOG00000009488;ENSRNOG00000009565;ENSRNOG00000010580;ENSRNOG00000012911;ENSRNOG00000013552;ENSRNOG00000014508;ENSRNOG00000014522;ENSRNOG00000014702;ENSRNOG00000015077;ENSRNOG00000018114;…	2.92195e-13	29	106	ENSRNOG00000000658;ENSRNOG00000001142;ENSRNOG00000002478;ENSRNOG00000002642;ENSRNOG00000003228;ENSRNOG00000008245;ENSRNOG00000008377;ENSRNOG00000009488;ENSRNOG00000009565;ENSRNOG00000009630;ENSRNOG00000010580;ENSRNOG00000012911;ENSRNOG00000013552;ENSRNOG00000013763;ENSRNOG00000014522;ENSRNOG00000015077;ENSRNOG00000018114;ENSRNOG00000018755;ENSRNOG00000020385;ENSRNOG00000020480;ENSRNOG00000020578;…	1.8408e-09
GO:0006635	fatty acid beta-oxidation					23	61	ENSRNOG00000000658;ENSRNOG00000001177;ENSRNOG00000006675;ENSRNOG00000006779;ENSRNOG00000008474;ENSRNOG00000008755;ENSRNOG00000009615;ENSRNOG00000009845;ENSRNOG00000010128;ENSRNOG00000011622;ENSRNOG00000011684;ENSRNOG00000012879;ENSRNOG00000014254;ENSRNOG00000014522;ENSRNOG00000014597;ENSRNOG00000017851;ENSRNOG00000018114;ENSRNOG00000018920;ENSRNOG00000020308;ENSRNOG00000024629;ENSRNOG00000029333;…	1.55951e-08	18	61	ENSRNOG00000000658;ENSRNOG00000006779;ENSRNOG00000008474;ENSRNOG00000008755;ENSRNOG00000009615;ENSRNOG00000009845;ENSRNOG00000010128;ENSRNOG00000011622;ENSRNOG00000014522;ENSRNOG00000018114;ENSRNOG00000018677;ENSRNOG00000018920;ENSRNOG00000020308;ENSRNOG00000024629;ENSRNOG00000028629;ENSRNOG00000029333;ENSRNOG00000029549;ENSRNOG00000046889	2.22405e-06
GO:0006637	acyl-CoA metabolic process					24	73	ENSRNOG00000000658;ENSRNOG00000004172;ENSRNOG00000005686;ENSRNOG00000006331;ENSRNOG00000006947;ENSRNOG00000007395;ENSRNOG00000007895;ENSRNOG00000008798;ENSRNOG00000009565;ENSRNOG00000010580;ENSRNOG00000011861;ENSRNOG00000013376;ENSRNOG00000014522;ENSRNOG00000016552;ENSRNOG00000016924;ENSRNOG00000018755;ENSRNOG00000019180;ENSRNOG00000020696;ENSRNOG00000029993;ENSRNOG00000031211;ENSRNOG00000034013;…	1.32145e-07	25	73	ENSRNOG00000000658;ENSRNOG00000006947;ENSRNOG00000007395;ENSRNOG00000007895;ENSRNOG00000008798;ENSRNOG00000009565;ENSRNOG00000009994;ENSRNOG00000010580;ENSRNOG00000010633;ENSRNOG00000011612;ENSRNOG00000013376;ENSRNOG00000014522;ENSRNOG00000016552;ENSRNOG00000016924;ENSRNOG00000017481;ENSRNOG00000018755;ENSRNOG00000019180;ENSRNOG00000020696;ENSRNOG00000029993;ENSRNOG00000031211;ENSRNOG00000034013;…	2.3571e-10
GO:0006638	neutral lipid metabolic process					25	97	ENSRNOG00000001189;ENSRNOG00000002478;ENSRNOG00000003500;ENSRNOG00000004377;ENSRNOG00000004464;ENSRNOG00000005542;ENSRNOG00000008167;ENSRNOG00000008364;ENSRNOG00000012404;ENSRNOG00000012458;ENSRNOG00000013552;ENSRNOG00000014254;ENSRNOG00000014508;ENSRNOG00000015124;ENSRNOG00000015519;ENSRNOG00000018402;ENSRNOG00000019180;ENSRNOG00000020990;ENSRNOG00000022268;ENSRNOG00000022296;ENSRNOG00000028616;…	8.98908e-06	22	97	ENSRNOG00000002478;ENSRNOG00000004377;ENSRNOG00000004464;ENSRNOG00000005542;ENSRNOG00000008167;ENSRNOG00000008364;ENSRNOG00000009946;ENSRNOG00000010633;ENSRNOG00000012404;ENSRNOG00000012458;ENSRNOG00000013552;ENSRNOG00000013704;ENSRNOG00000015124;ENSRNOG00000015519;ENSRNOG00000019180;ENSRNOG00000019626;ENSRNOG00000022268;ENSRNOG00000027434;ENSRNOG00000028616;ENSRNOG00000046834;ENSRNOG00000047503;…	1.00689e-05
GO:0006639	acylglycerol metabolic process					25	95	ENSRNOG00000001189;ENSRNOG00000002478;ENSRNOG00000003500;ENSRNOG00000004377;ENSRNOG00000004464;ENSRNOG00000005542;ENSRNOG00000008167;ENSRNOG00000008364;ENSRNOG00000012404;ENSRNOG00000012458;ENSRNOG00000013552;ENSRNOG00000014254;ENSRNOG00000014508;ENSRNOG00000015124;ENSRNOG00000015519;ENSRNOG00000018402;ENSRNOG00000019180;ENSRNOG00000020990;ENSRNOG00000022268;ENSRNOG00000022296;ENSRNOG00000028616;…	6.15268e-06	22	95	ENSRNOG00000002478;ENSRNOG00000004377;ENSRNOG00000004464;ENSRNOG00000005542;ENSRNOG00000008167;ENSRNOG00000008364;ENSRNOG00000009946;ENSRNOG00000010633;ENSRNOG00000012404;ENSRNOG00000012458;ENSRNOG00000013552;ENSRNOG00000013704;ENSRNOG00000015124;ENSRNOG00000015519;ENSRNOG00000019180;ENSRNOG00000019626;ENSRNOG00000022268;ENSRNOG00000027434;ENSRNOG00000028616;ENSRNOG00000046834;ENSRNOG00000047503;…	7.06868e-06
GO:0006641	triglyceride metabolic process					22	77	ENSRNOG00000001189;ENSRNOG00000002478;ENSRNOG00000004377;ENSRNOG00000004464;ENSRNOG00000005542;ENSRNOG00000008364;ENSRNOG00000012404;ENSRNOG00000012458;ENSRNOG00000013552;ENSRNOG00000014254;ENSRNOG00000014508;ENSRNOG00000015124;ENSRNOG00000018402;ENSRNOG00000019180;ENSRNOG00000020990;ENSRNOG00000022268;ENSRNOG00000022296;ENSRNOG00000028616;ENSRNOG00000047503;ENSRNOG00000048812;ENSRNOG00000051171;…	7.07429e-06	20	77	ENSRNOG00000002478;ENSRNOG00000004377;ENSRNOG00000004464;ENSRNOG00000005542;ENSRNOG00000008364;ENSRNOG00000009946;ENSRNOG00000010633;ENSRNOG00000012404;ENSRNOG00000012458;ENSRNOG00000013552;ENSRNOG00000013704;ENSRNOG00000015124;ENSRNOG00000019180;ENSRNOG00000019626;ENSRNOG00000022268;ENSRNOG00000027434;ENSRNOG00000028616;ENSRNOG00000046834;ENSRNOG00000047503;ENSRNOG00000051171	3.91466e-06
GO:0006690	icosanoid metabolic process					16	79	ENSRNOG00000002642;ENSRNOG00000004245;ENSRNOG00000004649;ENSRNOG00000008245;ENSRNOG00000008755;ENSRNOG00000008988;ENSRNOG00000012458;ENSRNOG00000014508;ENSRNOG00000017672;ENSRNOG00000020480;ENSRNOG00000021924;ENSRNOG00000028891;ENSRNOG00000031004;ENSRNOG00000033164;ENSRNOG00000043233;ENSRNOG00000061857	0.0102771	13	79	ENSRNOG00000002642;ENSRNOG00000008245;ENSRNOG00000008755;ENSRNOG00000008988;ENSRNOG00000012458;ENSRNOG00000015072;ENSRNOG00000017672;ENSRNOG00000020480;ENSRNOG00000020817;ENSRNOG00000021924;ENSRNOG00000028891;ENSRNOG00000031312;ENSRNOG00000033164	0.0228461
GO:0006695	cholesterol biosynthetic process					12	34	ENSRNOG00000002115;ENSRNOG00000002478;ENSRNOG00000005542;ENSRNOG00000009488;ENSRNOG00000012911;ENSRNOG00000013376;ENSRNOG00000016552;ENSRNOG00000020696;ENSRNOG00000020776;ENSRNOG00000020853;ENSRNOG00000054549;ENSRNOG00000056728	0.000304438	17	34	ENSRNOG00000002478;ENSRNOG00000002826;ENSRNOG00000005542;ENSRNOG00000006787;ENSRNOG00000009488;ENSRNOG00000012911;ENSRNOG00000013376;ENSRNOG00000013763;ENSRNOG00000016122;ENSRNOG00000016552;ENSRNOG00000020696;ENSRNOG00000020853;ENSRNOG00000020989;ENSRNOG00000049604;ENSRNOG00000054549;ENSRNOG00000056728;ENSRNOG00000057814	5.77323e-10
GO:0006720	isoprenoid metabolic process					18	80	ENSRNOG00000000411;ENSRNOG00000002342;ENSRNOG00000002358;ENSRNOG00000004332;ENSRNOG00000012436;ENSRNOG00000012458;ENSRNOG00000013376;ENSRNOG00000013794;ENSRNOG00000014907;ENSRNOG00000015736;ENSRNOG00000016275;ENSRNOG00000016552;ENSRNOG00000018044;ENSRNOG00000020696;ENSRNOG00000024705;ENSRNOG00000031004;ENSRNOG00000054770;ENSRNOG00000055295	0.00170426	16	80	ENSRNOG00000002342;ENSRNOG00000002358;ENSRNOG00000009734;ENSRNOG00000009799;ENSRNOG00000012436;ENSRNOG00000012458;ENSRNOG00000013376;ENSRNOG00000013794;ENSRNOG00000014907;ENSRNOG00000015518;ENSRNOG00000016122;ENSRNOG00000016552;ENSRNOG00000016690;ENSRNOG00000018044;ENSRNOG00000020696;ENSRNOG00000049604	0.00126404
GO:0006725	cellular aromatic compound metabolic process					507	4910	ENSRNOG00000000064;ENSRNOG00000000397;ENSRNOG00000000461;ENSRNOG00000000467;ENSRNOG00000000488;ENSRNOG00000000520;ENSRNOG00000000521;ENSRNOG00000000604;ENSRNOG00000000658;ENSRNOG00000000808;ENSRNOG00000000815;ENSRNOG00000000841;ENSRNOG00000000867;ENSRNOG00000000909;ENSRNOG00000000923;ENSRNOG00000000989;ENSRNOG00000001030;ENSRNOG00000001139;ENSRNOG00000001172;ENSRNOG00000001189;ENSRNOG00000001239;…	4.02777e-08	377	4910	ENSRNOG00000000064;ENSRNOG00000000397;ENSRNOG00000000422;ENSRNOG00000000461;ENSRNOG00000000520;ENSRNOG00000000521;ENSRNOG00000000604;ENSRNOG00000000658;ENSRNOG00000001030;ENSRNOG00000001050;ENSRNOG00000001203;ENSRNOG00000001239;ENSRNOG00000001314;ENSRNOG00000001647;ENSRNOG00000001797;ENSRNOG00000001967;ENSRNOG00000002186;ENSRNOG00000002292;ENSRNOG00000002341;ENSRNOG00000002389;ENSRNOG00000002393;…	0.000934344
GO:0006733	oxidoreduction coenzyme metabolic process					29	163	ENSRNOG00000003709;ENSRNOG00000006589;ENSRNOG00000006807;ENSRNOG00000009715;ENSRNOG00000009982;ENSRNOG00000015290;ENSRNOG00000016190;ENSRNOG00000017895;ENSRNOG00000019201;ENSRNOG00000019458;ENSRNOG00000019742;ENSRNOG00000020420;ENSRNOG00000023150;ENSRNOG00000023587;ENSRNOG00000029993;ENSRNOG00000031263;ENSRNOG00000034191;ENSRNOG00000043201;ENSRNOG00000049497;ENSRNOG00000050315;ENSRNOG00000050585;…	0.00152566	23	163	ENSRNOG00000005861;ENSRNOG00000006589;ENSRNOG00000008103;ENSRNOG00000009715;ENSRNOG00000013949;ENSRNOG00000016122;ENSRNOG00000016190;ENSRNOG00000017523;ENSRNOG00000019458;ENSRNOG00000019742;ENSRNOG00000020420;ENSRNOG00000022576;ENSRNOG00000023150;ENSRNOG00000023587;ENSRNOG00000029993;ENSRNOG00000034242;ENSRNOG00000050585;ENSRNOG00000052802;ENSRNOG00000056076;ENSRNOG00000056457;ENSRNOG00000056728;…	0.00676564
GO:0006749	glutathione metabolic process					13	44	ENSRNOG00000002115;ENSRNOG00000006302;ENSRNOG00000007743;ENSRNOG00000011781;ENSRNOG00000014387;ENSRNOG00000018289;ENSRNOG00000018964;ENSRNOG00000019982;ENSRNOG00000048812;ENSRNOG00000049771;ENSRNOG00000052360;ENSRNOG00000056728;ENSRNOG00000061857	0.000961353	9	44	ENSRNOG00000006302;ENSRNOG00000011781;ENSRNOG00000013409;ENSRNOG00000014915;ENSRNOG00000018237;ENSRNOG00000018964;ENSRNOG00000019982;ENSRNOG00000052360;ENSRNOG00000056728	0.0247663
GO:0006790	sulfur compound metabolic process					54	232	ENSRNOG00000000172;ENSRNOG00000000185;ENSRNOG00000000186;ENSRNOG00000000658;ENSRNOG00000000900;ENSRNOG00000001889;ENSRNOG00000002115;ENSRNOG00000002643;ENSRNOG00000004172;ENSRNOG00000005686;ENSRNOG00000006302;ENSRNOG00000006331;ENSRNOG00000006947;ENSRNOG00000007395;ENSRNOG00000007743;ENSRNOG00000007895;ENSRNOG00000008553;ENSRNOG00000008798;ENSRNOG00000009565;ENSRNOG00000010580;ENSRNOG00000011781;…	2.14886e-10	49	232	ENSRNOG00000000158;ENSRNOG00000000186;ENSRNOG00000000658;ENSRNOG00000001967;ENSRNOG00000003177;ENSRNOG00000003728;ENSRNOG00000006302;ENSRNOG00000006947;ENSRNOG00000007395;ENSRNOG00000007895;ENSRNOG00000008798;ENSRNOG00000009565;ENSRNOG00000009994;ENSRNOG00000010580;ENSRNOG00000010633;ENSRNOG00000011200;ENSRNOG00000011612;ENSRNOG00000011781;ENSRNOG00000013376;ENSRNOG00000013409;ENSRNOG00000013704;…	1.91453e-11
GO:0006793	phosphorus metabolic process					310	2819	ENSRNOG00000000064;ENSRNOG00000000068;ENSRNOG00000000165;ENSRNOG00000000177;ENSRNOG00000000411;ENSRNOG00000000521;ENSRNOG00000000557;ENSRNOG00000000571;ENSRNOG00000000604;ENSRNOG00000000658;ENSRNOG00000000796;ENSRNOG00000000815;ENSRNOG00000000847;ENSRNOG00000000853;ENSRNOG00000001142;ENSRNOG00000001189;ENSRNOG00000001269;ENSRNOG00000001797;ENSRNOG00000001979;ENSRNOG00000002115;ENSRNOG00000002125;…	7.23994e-07	268	2819	ENSRNOG00000000048;ENSRNOG00000000064;ENSRNOG00000000068;ENSRNOG00000000165;ENSRNOG00000000521;ENSRNOG00000000604;ENSRNOG00000000658;ENSRNOG00000000796;ENSRNOG00000001050;ENSRNOG00000001142;ENSRNOG00000001269;ENSRNOG00000001314;ENSRNOG00000001345;ENSRNOG00000001706;ENSRNOG00000001738;ENSRNOG00000001797;ENSRNOG00000001967;ENSRNOG00000001979;ENSRNOG00000002125;ENSRNOG00000002186;ENSRNOG00000002278;…	6.65946e-10
GO:0006796	phosphate-containing compound metabolic process					307	2799	ENSRNOG00000000064;ENSRNOG00000000068;ENSRNOG00000000165;ENSRNOG00000000177;ENSRNOG00000000411;ENSRNOG00000000521;ENSRNOG00000000557;ENSRNOG00000000571;ENSRNOG00000000604;ENSRNOG00000000658;ENSRNOG00000000796;ENSRNOG00000000815;ENSRNOG00000000847;ENSRNOG00000000853;ENSRNOG00000001142;ENSRNOG00000001189;ENSRNOG00000001269;ENSRNOG00000001797;ENSRNOG00000001979;ENSRNOG00000002115;ENSRNOG00000002125;…	1.07311e-06	267	2799	ENSRNOG00000000048;ENSRNOG00000000064;ENSRNOG00000000068;ENSRNOG00000000165;ENSRNOG00000000521;ENSRNOG00000000604;ENSRNOG00000000658;ENSRNOG00000000796;ENSRNOG00000001050;ENSRNOG00000001142;ENSRNOG00000001269;ENSRNOG00000001314;ENSRNOG00000001345;ENSRNOG00000001706;ENSRNOG00000001738;ENSRNOG00000001797;ENSRNOG00000001967;ENSRNOG00000001979;ENSRNOG00000002125;ENSRNOG00000002186;ENSRNOG00000002278;…	5.26122e-10
GO:0006807	nitrogen compound metabolic process					908	9077	ENSRNOG00000000053;ENSRNOG00000000064;ENSRNOG00000000068;ENSRNOG00000000150;ENSRNOG00000000164;ENSRNOG00000000185;ENSRNOG00000000314;ENSRNOG00000000322;ENSRNOG00000000397;ENSRNOG00000000411;ENSRNOG00000000461;ENSRNOG00000000467;ENSRNOG00000000488;ENSRNOG00000000520;ENSRNOG00000000521;ENSRNOG00000000527;ENSRNOG00000000571;ENSRNOG00000000604;ENSRNOG00000000658;ENSRNOG00000000796;ENSRNOG00000000799;…	1.97592e-16	688	9077	ENSRNOG00000000048;ENSRNOG00000000053;ENSRNOG00000000064;ENSRNOG00000000068;ENSRNOG00000000150;ENSRNOG00000000158;ENSRNOG00000000164;ENSRNOG00000000397;ENSRNOG00000000422;ENSRNOG00000000438;ENSRNOG00000000461;ENSRNOG00000000520;ENSRNOG00000000521;ENSRNOG00000000527;ENSRNOG00000000582;ENSRNOG00000000604;ENSRNOG00000000658;ENSRNOG00000000796;ENSRNOG00000000799;ENSRNOG00000000800;ENSRNOG00000000903;…	2.47594e-08
GO:0006810	transport					385	4005	ENSRNOG00000000053;ENSRNOG00000000064;ENSRNOG00000000150;ENSRNOG00000000164;ENSRNOG00000000186;ENSRNOG00000000219;ENSRNOG00000000314;ENSRNOG00000000322;ENSRNOG00000000411;ENSRNOG00000000520;ENSRNOG00000000521;ENSRNOG00000000557;ENSRNOG00000000571;ENSRNOG00000000796;ENSRNOG00000000841;ENSRNOG00000000853;ENSRNOG00000000967;ENSRNOG00000001083;ENSRNOG00000001148;ENSRNOG00000001173;ENSRNOG00000001189;…	0.00438968	320	4005	ENSRNOG00000000048;ENSRNOG00000000053;ENSRNOG00000000064;ENSRNOG00000000096;ENSRNOG00000000150;ENSRNOG00000000158;ENSRNOG00000000164;ENSRNOG00000000186;ENSRNOG00000000470;ENSRNOG00000000512;ENSRNOG00000000520;ENSRNOG00000000521;ENSRNOG00000000588;ENSRNOG00000000665;ENSRNOG00000000796;ENSRNOG00000000967;ENSRNOG00000001050;ENSRNOG00000001052;ENSRNOG00000001083;ENSRNOG00000001173;ENSRNOG00000001258;…	0.000251797
GO:0006869	lipid transport					41	295	ENSRNOG00000000411;ENSRNOG00000000571;ENSRNOG00000002225;ENSRNOG00000002393;ENSRNOG00000003472;ENSRNOG00000003500;ENSRNOG00000004040;ENSRNOG00000004649;ENSRNOG00000005542;ENSRNOG00000006338;ENSRNOG00000006622;ENSRNOG00000006675;ENSRNOG00000006779;ENSRNOG00000007139;ENSRNOG00000008012;ENSRNOG00000010128;ENSRNOG00000010362;ENSRNOG00000010895;ENSRNOG00000012879;ENSRNOG00000016360;ENSRNOG00000018402;…	0.0107972	39	295	ENSRNOG00000000096;ENSRNOG00000000665;ENSRNOG00000001782;ENSRNOG00000002393;ENSRNOG00000005542;ENSRNOG00000005794;ENSRNOG00000006622;ENSRNOG00000006779;ENSRNOG00000007060;ENSRNOG00000007139;ENSRNOG00000008012;ENSRNOG00000009005;ENSRNOG00000009946;ENSRNOG00000010128;ENSRNOG00000010633;ENSRNOG00000010895;ENSRNOG00000014532;ENSRNOG00000014604;ENSRNOG00000015518;ENSRNOG00000017976;ENSRNOG00000018677;…	0.000547545
GO:0006886	intracellular protein transport					114	799	ENSRNOG00000000164;ENSRNOG00000000314;ENSRNOG00000000520;ENSRNOG00000000521;ENSRNOG00000000557;ENSRNOG00000000796;ENSRNOG00000000841;ENSRNOG00000001173;ENSRNOG00000001415;ENSRNOG00000001420;ENSRNOG00000001436;ENSRNOG00000001709;ENSRNOG00000002039;ENSRNOG00000002225;ENSRNOG00000002251;ENSRNOG00000002301;ENSRNOG00000003497;ENSRNOG00000003747;ENSRNOG00000004291;ENSRNOG00000004464;ENSRNOG00000004563;…	2.51238e-07	92	799	ENSRNOG00000000096;ENSRNOG00000000164;ENSRNOG00000000520;ENSRNOG00000000521;ENSRNOG00000000796;ENSRNOG00000001173;ENSRNOG00000001258;ENSRNOG00000001415;ENSRNOG00000001436;ENSRNOG00000002039;ENSRNOG00000002251;ENSRNOG00000002615;ENSRNOG00000003747;ENSRNOG00000004072;ENSRNOG00000004464;ENSRNOG00000004657;ENSRNOG00000004700;ENSRNOG00000005229;ENSRNOG00000005257;ENSRNOG00000005358;ENSRNOG00000006130;…	2.57485e-06
GO:0006888	ER to Golgi vesicle-mediated transport					20	105	ENSRNOG00000001083;ENSRNOG00000002251;ENSRNOG00000002301;ENSRNOG00000004563;ENSRNOG00000005229;ENSRNOG00000005331;ENSRNOG00000008411;ENSRNOG00000010224;ENSRNOG00000010474;ENSRNOG00000010944;ENSRNOG00000011008;ENSRNOG00000012826;ENSRNOG00000014429;ENSRNOG00000014485;ENSRNOG00000014872;ENSRNOG00000019122;ENSRNOG00000020178;ENSRNOG00000037627;ENSRNOG00000050510;ENSRNOG00000057623	0.0061532	22	105	ENSRNOG00000001083;ENSRNOG00000002251;ENSRNOG00000004657;ENSRNOG00000005229;ENSRNOG00000005331;ENSRNOG00000005766;ENSRNOG00000006139;ENSRNOG00000008411;ENSRNOG00000010224;ENSRNOG00000010474;ENSRNOG00000010628;ENSRNOG00000010944;ENSRNOG00000012826;ENSRNOG00000014429;ENSRNOG00000014872;ENSRNOG00000019122;ENSRNOG00000022482;ENSRNOG00000024470;ENSRNOG00000034242;ENSRNOG00000037627;ENSRNOG00000057623;…	3.55966e-05
GO:0006900	vesicle budding from membrane					14	44	ENSRNOG00000002251;ENSRNOG00000004563;ENSRNOG00000005229;ENSRNOG00000005331;ENSRNOG00000007649;ENSRNOG00000008411;ENSRNOG00000010362;ENSRNOG00000014429;ENSRNOG00000014485;ENSRNOG00000014872;ENSRNOG00000017506;ENSRNOG00000018322;ENSRNOG00000018977;ENSRNOG00000019122	0.000235477	11	44	ENSRNOG00000002251;ENSRNOG00000004657;ENSRNOG00000005229;ENSRNOG00000005331;ENSRNOG00000005766;ENSRNOG00000008411;ENSRNOG00000010628;ENSRNOG00000014429;ENSRNOG00000014872;ENSRNOG00000018322;ENSRNOG00000019122	0.00216109
GO:0006913	nucleocytoplasmic transport					39	260	ENSRNOG00000000520;ENSRNOG00000000521;ENSRNOG00000000796;ENSRNOG00000000841;ENSRNOG00000001173;ENSRNOG00000001269;ENSRNOG00000002735;ENSRNOG00000003497;ENSRNOG00000004700;ENSRNOG00000005257;ENSRNOG00000006913;ENSRNOG00000007088;ENSRNOG00000007315;ENSRNOG00000007665;ENSRNOG00000010235;ENSRNOG00000010420;ENSRNOG00000010989;ENSRNOG00000012081;ENSRNOG00000012999;ENSRNOG00000014448;ENSRNOG00000016722;…	0.00391548	32	260	ENSRNOG00000000520;ENSRNOG00000000521;ENSRNOG00000000796;ENSRNOG00000001173;ENSRNOG00000001269;ENSRNOG00000002292;ENSRNOG00000002735;ENSRNOG00000004700;ENSRNOG00000005257;ENSRNOG00000006355;ENSRNOG00000007088;ENSRNOG00000007665;ENSRNOG00000009882;ENSRNOG00000010235;ENSRNOG00000012999;ENSRNOG00000014448;ENSRNOG00000015380;ENSRNOG00000018233;ENSRNOG00000019069;ENSRNOG00000019618;ENSRNOG00000019638;…	0.00689246
GO:0006914	autophagy					49	344	ENSRNOG00000000164;ENSRNOG00000000322;ENSRNOG00000001420;ENSRNOG00000003147;ENSRNOG00000003649;ENSRNOG00000004637;ENSRNOG00000005528;ENSRNOG00000006375;ENSRNOG00000007916;ENSRNOG00000007964;ENSRNOG00000008604;ENSRNOG00000009252;ENSRNOG00000009615;ENSRNOG00000009920;ENSRNOG00000011951;ENSRNOG00000012247;ENSRNOG00000012748;ENSRNOG00000014117;ENSRNOG00000015385;ENSRNOG00000015857;ENSRNOG00000016509;…	0.00257801	37	344	ENSRNOG00000000164;ENSRNOG00000000438;ENSRNOG00000001738;ENSRNOG00000003147;ENSRNOG00000003302;ENSRNOG00000006375;ENSRNOG00000007529;ENSRNOG00000008891;ENSRNOG00000009252;ENSRNOG00000009615;ENSRNOG00000012247;ENSRNOG00000013387;ENSRNOG00000014117;ENSRNOG00000016509;ENSRNOG00000016984;ENSRNOG00000017941;ENSRNOG00000018698;ENSRNOG00000019282;ENSRNOG00000019710;ENSRNOG00000019742;ENSRNOG00000019834;…	0.0234573
GO:0006915	apoptotic process					174	1485	ENSRNOG00000000322;ENSRNOG00000000521;ENSRNOG00000000527;ENSRNOG00000000827;ENSRNOG00000000853;ENSRNOG00000001139;ENSRNOG00000001189;ENSRNOG00000001271;ENSRNOG00000001420;ENSRNOG00000001829;ENSRNOG00000002115;ENSRNOG00000002618;ENSRNOG00000002671;ENSRNOG00000002911;ENSRNOG00000003147;ENSRNOG00000003223;ENSRNOG00000003232;ENSRNOG00000003256;ENSRNOG00000003497;ENSRNOG00000003689;ENSRNOG00000003745;…	3.10881e-05	125	1485	ENSRNOG00000000521;ENSRNOG00000000527;ENSRNOG00000000827;ENSRNOG00000002618;ENSRNOG00000002946;ENSRNOG00000003147;ENSRNOG00000003232;ENSRNOG00000003256;ENSRNOG00000003302;ENSRNOG00000003977;ENSRNOG00000004284;ENSRNOG00000004294;ENSRNOG00000004964;ENSRNOG00000005276;ENSRNOG00000005310;ENSRNOG00000005615;ENSRNOG00000005796;ENSRNOG00000005882;ENSRNOG00000006067;ENSRNOG00000006302;ENSRNOG00000006375;…	0.0178314
GO:0006950	response to stress					339	3090	ENSRNOG00000000053;ENSRNOG00000000164;ENSRNOG00000000165;ENSRNOG00000000322;ENSRNOG00000000488;ENSRNOG00000000521;ENSRNOG00000000571;ENSRNOG00000000604;ENSRNOG00000000798;ENSRNOG00000000808;ENSRNOG00000000827;ENSRNOG00000000841;ENSRNOG00000000853;ENSRNOG00000000967;ENSRNOG00000001189;ENSRNOG00000001239;ENSRNOG00000001285;ENSRNOG00000001420;ENSRNOG00000001582;ENSRNOG00000001598;ENSRNOG00000001710;…	1.73243e-07	279	3090	ENSRNOG00000000053;ENSRNOG00000000164;ENSRNOG00000000165;ENSRNOG00000000438;ENSRNOG00000000521;ENSRNOG00000000604;ENSRNOG00000000798;ENSRNOG00000000827;ENSRNOG00000000967;ENSRNOG00000001050;ENSRNOG00000001229;ENSRNOG00000001239;ENSRNOG00000001285;ENSRNOG00000001293;ENSRNOG00000001710;ENSRNOG00000001738;ENSRNOG00000001926;ENSRNOG00000001963;ENSRNOG00000002050;ENSRNOG00000002278;ENSRNOG00000002292;…	4.99295e-08
GO:0006979	response to oxidative stress					69	397	ENSRNOG00000000053;ENSRNOG00000000571;ENSRNOG00000000604;ENSRNOG00000000853;ENSRNOG00000001285;ENSRNOG00000001783;ENSRNOG00000002115;ENSRNOG00000002671;ENSRNOG00000003689;ENSRNOG00000003763;ENSRNOG00000003773;ENSRNOG00000003977;ENSRNOG00000004172;ENSRNOG00000004284;ENSRNOG00000004332;ENSRNOG00000004637;ENSRNOG00000005195;ENSRNOG00000005418;ENSRNOG00000005614;ENSRNOG00000006302;ENSRNOG00000006589;…	1.47413e-07	51	397	ENSRNOG00000000053;ENSRNOG00000000604;ENSRNOG00000001285;ENSRNOG00000002292;ENSRNOG00000003977;ENSRNOG00000004284;ENSRNOG00000004601;ENSRNOG00000006067;ENSRNOG00000006302;ENSRNOG00000006589;ENSRNOG00000006787;ENSRNOG00000007781;ENSRNOG00000008364;ENSRNOG00000009568;ENSRNOG00000010558;ENSRNOG00000011039;ENSRNOG00000012458;ENSRNOG00000012772;ENSRNOG00000013180;ENSRNOG00000013328;ENSRNOG00000013409;…	8.57958e-05
GO:0007005	mitochondrion organization					73	390	ENSRNOG00000000322;ENSRNOG00000001420;ENSRNOG00000003049;ENSRNOG00000003147;ENSRNOG00000004060;ENSRNOG00000004553;ENSRNOG00000004637;ENSRNOG00000005618;ENSRNOG00000005668;ENSRNOG00000005698;ENSRNOG00000006302;ENSRNOG00000006375;ENSRNOG00000006399;ENSRNOG00000007040;ENSRNOG00000009063;ENSRNOG00000009252;ENSRNOG00000009364;ENSRNOG00000009713;ENSRNOG00000010558;ENSRNOG00000011542;ENSRNOG00000011952;…	2.17831e-09	47	390	ENSRNOG00000001738;ENSRNOG00000003147;ENSRNOG00000003302;ENSRNOG00000004060;ENSRNOG00000004553;ENSRNOG00000004640;ENSRNOG00000005668;ENSRNOG00000006302;ENSRNOG00000006375;ENSRNOG00000007040;ENSRNOG00000008222;ENSRNOG00000009252;ENSRNOG00000010558;ENSRNOG00000011849;ENSRNOG00000012100;ENSRNOG00000012314;ENSRNOG00000012693;ENSRNOG00000012999;ENSRNOG00000013409;ENSRNOG00000013766;ENSRNOG00000014525;…	0.000832711
GO:0007568	aging					52	329	ENSRNOG00000000053;ENSRNOG00000000314;ENSRNOG00000000488;ENSRNOG00000000521;ENSRNOG00000001926;ENSRNOG00000002115;ENSRNOG00000002520;ENSRNOG00000002572;ENSRNOG00000002636;ENSRNOG00000002991;ENSRNOG00000003709;ENSRNOG00000005796;ENSRNOG00000006302;ENSRNOG00000006589;ENSRNOG00000006997;ENSRNOG00000007041;ENSRNOG00000007457;ENSRNOG00000007492;ENSRNOG00000008015;ENSRNOG00000008364;ENSRNOG00000008706;…	0.000140231	40	329	ENSRNOG00000000053;ENSRNOG00000000521;ENSRNOG00000001926;ENSRNOG00000002520;ENSRNOG00000002572;ENSRNOG00000002636;ENSRNOG00000005796;ENSRNOG00000006302;ENSRNOG00000006589;ENSRNOG00000007237;ENSRNOG00000007457;ENSRNOG00000007492;ENSRNOG00000008364;ENSRNOG00000008837;ENSRNOG00000009615;ENSRNOG00000009882;ENSRNOG00000012772;ENSRNOG00000013409;ENSRNOG00000014448;ENSRNOG00000016122;ENSRNOG00000016496;…	0.00221821
GO:0007584	response to nutrient					41	233	ENSRNOG00000000967;ENSRNOG00000001524;ENSRNOG00000002115;ENSRNOG00000002783;ENSRNOG00000004172;ENSRNOG00000004332;ENSRNOG00000004649;ENSRNOG00000006302;ENSRNOG00000006589;ENSRNOG00000007041;ENSRNOG00000007139;ENSRNOG00000007235;ENSRNOG00000008012;ENSRNOG00000008364;ENSRNOG00000008553;ENSRNOG00000009615;ENSRNOG00000010643;ENSRNOG00000012772;ENSRNOG00000012840;ENSRNOG00000013794;ENSRNOG00000013954;…	0.000103661	42	233	ENSRNOG00000000967;ENSRNOG00000002341;ENSRNOG00000002783;ENSRNOG00000004294;ENSRNOG00000006067;ENSRNOG00000006302;ENSRNOG00000006589;ENSRNOG00000007139;ENSRNOG00000007235;ENSRNOG00000007990;ENSRNOG00000008012;ENSRNOG00000008364;ENSRNOG00000008837;ENSRNOG00000009615;ENSRNOG00000010633;ENSRNOG00000010643;ENSRNOG00000012772;ENSRNOG00000013387;ENSRNOG00000013409;ENSRNOG00000013794;ENSRNOG00000013954;…	1.05858e-07
GO:0008104	protein localization					235	2135	ENSRNOG00000000053;ENSRNOG00000000068;ENSRNOG00000000150;ENSRNOG00000000164;ENSRNOG00000000314;ENSRNOG00000000322;ENSRNOG00000000520;ENSRNOG00000000521;ENSRNOG00000000557;ENSRNOG00000000796;ENSRNOG00000000841;ENSRNOG00000000853;ENSRNOG00000000923;ENSRNOG00000000967;ENSRNOG00000001083;ENSRNOG00000001173;ENSRNOG00000001415;ENSRNOG00000001420;ENSRNOG00000001429;ENSRNOG00000001436;ENSRNOG00000001709;…	4.23997e-05	192	2135	ENSRNOG00000000048;ENSRNOG00000000053;ENSRNOG00000000068;ENSRNOG00000000096;ENSRNOG00000000150;ENSRNOG00000000164;ENSRNOG00000000470;ENSRNOG00000000520;ENSRNOG00000000521;ENSRNOG00000000796;ENSRNOG00000000967;ENSRNOG00000001083;ENSRNOG00000001173;ENSRNOG00000001258;ENSRNOG00000001293;ENSRNOG00000001415;ENSRNOG00000001436;ENSRNOG00000001706;ENSRNOG00000001825;ENSRNOG00000002039;ENSRNOG00000002251;…	3.35722e-05
GO:0008202	steroid metabolic process					37	216	ENSRNOG00000001889;ENSRNOG00000002115;ENSRNOG00000002478;ENSRNOG00000003500;ENSRNOG00000004649;ENSRNOG00000005542;ENSRNOG00000006859;ENSRNOG00000006997;ENSRNOG00000007395;ENSRNOG00000008364;ENSRNOG00000009488;ENSRNOG00000009550;ENSRNOG00000010034;ENSRNOG00000010128;ENSRNOG00000012458;ENSRNOG00000012911;ENSRNOG00000013004;ENSRNOG00000013376;ENSRNOG00000013552;ENSRNOG00000016552;ENSRNOG00000017188;…	0.000455063	44	216	ENSRNOG00000001967;ENSRNOG00000002050;ENSRNOG00000002478;ENSRNOG00000002826;ENSRNOG00000005542;ENSRNOG00000005861;ENSRNOG00000006787;ENSRNOG00000006859;ENSRNOG00000007395;ENSRNOG00000008074;ENSRNOG00000008364;ENSRNOG00000009488;ENSRNOG00000009550;ENSRNOG00000009630;ENSRNOG00000009946;ENSRNOG00000010128;ENSRNOG00000012123;ENSRNOG00000012458;ENSRNOG00000012911;ENSRNOG00000013004;ENSRNOG00000013376;…	9.00939e-10
GO:0008203	cholesterol metabolic process					22	87	ENSRNOG00000002115;ENSRNOG00000002478;ENSRNOG00000003500;ENSRNOG00000005542;ENSRNOG00000006859;ENSRNOG00000006997;ENSRNOG00000008364;ENSRNOG00000009488;ENSRNOG00000009550;ENSRNOG00000012911;ENSRNOG00000013004;ENSRNOG00000013376;ENSRNOG00000016552;ENSRNOG00000017188;ENSRNOG00000018114;ENSRNOG00000019573;ENSRNOG00000020696;ENSRNOG00000020776;ENSRNOG00000020853;ENSRNOG00000054549;ENSRNOG00000056728;…	5.91748e-05	27	87	ENSRNOG00000002478;ENSRNOG00000002826;ENSRNOG00000005542;ENSRNOG00000006787;ENSRNOG00000006859;ENSRNOG00000008074;ENSRNOG00000008364;ENSRNOG00000009488;ENSRNOG00000009550;ENSRNOG00000009946;ENSRNOG00000012123;ENSRNOG00000012911;ENSRNOG00000013004;ENSRNOG00000013376;ENSRNOG00000013763;ENSRNOG00000016122;ENSRNOG00000016552;ENSRNOG00000017188;ENSRNOG00000018114;ENSRNOG00000020696;ENSRNOG00000020853;…	4.34077e-10
GO:0008219	cell death					194	1646	ENSRNOG00000000322;ENSRNOG00000000521;ENSRNOG00000000527;ENSRNOG00000000571;ENSRNOG00000000827;ENSRNOG00000000853;ENSRNOG00000001139;ENSRNOG00000001189;ENSRNOG00000001271;ENSRNOG00000001420;ENSRNOG00000001829;ENSRNOG00000002115;ENSRNOG00000002572;ENSRNOG00000002618;ENSRNOG00000002642;ENSRNOG00000002671;ENSRNOG00000002911;ENSRNOG00000003147;ENSRNOG00000003223;ENSRNOG00000003232;ENSRNOG00000003256;…	5.15998e-06	139	1646	ENSRNOG00000000521;ENSRNOG00000000527;ENSRNOG00000000827;ENSRNOG00000001738;ENSRNOG00000002572;ENSRNOG00000002618;ENSRNOG00000002642;ENSRNOG00000002946;ENSRNOG00000003147;ENSRNOG00000003232;ENSRNOG00000003256;ENSRNOG00000003302;ENSRNOG00000003977;ENSRNOG00000004284;ENSRNOG00000004294;ENSRNOG00000004964;ENSRNOG00000005276;ENSRNOG00000005310;ENSRNOG00000005615;ENSRNOG00000005796;ENSRNOG00000005882;…	0.00975932
GO:0008380	RNA splicing					63	308	ENSRNOG00000000520;ENSRNOG00000000841;ENSRNOG00000000989;ENSRNOG00000001783;ENSRNOG00000002618;ENSRNOG00000002735;ENSRNOG00000002818;ENSRNOG00000002871;ENSRNOG00000003497;ENSRNOG00000003689;ENSRNOG00000003714;ENSRNOG00000004287;ENSRNOG00000005513;ENSRNOG00000006652;ENSRNOG00000006655;ENSRNOG00000007134;ENSRNOG00000007532;ENSRNOG00000007629;ENSRNOG00000007671;ENSRNOG00000007766;ENSRNOG00000007921;…	1.18414e-09	44	308	ENSRNOG00000000520;ENSRNOG00000002618;ENSRNOG00000002735;ENSRNOG00000002818;ENSRNOG00000002871;ENSRNOG00000004287;ENSRNOG00000004813;ENSRNOG00000005513;ENSRNOG00000006380;ENSRNOG00000006420;ENSRNOG00000006652;ENSRNOG00000006655;ENSRNOG00000007838;ENSRNOG00000008639;ENSRNOG00000009639;ENSRNOG00000009960;ENSRNOG00000011667;ENSRNOG00000011932;ENSRNOG00000013328;ENSRNOG00000013516;ENSRNOG00000014501;…	2.8312e-05
GO:0009056	catabolic process					292	2000	ENSRNOG00000000164;ENSRNOG00000000322;ENSRNOG00000000571;ENSRNOG00000000658;ENSRNOG00000000815;ENSRNOG00000001177;ENSRNOG00000001385;ENSRNOG00000001391;ENSRNOG00000001420;ENSRNOG00000001598;ENSRNOG00000001602;ENSRNOG00000001719;ENSRNOG00000001829;ENSRNOG00000001889;ENSRNOG00000002186;ENSRNOG00000002225;ENSRNOG00000002358;ENSRNOG00000002636;ENSRNOG00000002735;ENSRNOG00000002755;ENSRNOG00000002828;…	1.56373e-21	241	2000	ENSRNOG00000000158;ENSRNOG00000000164;ENSRNOG00000000422;ENSRNOG00000000438;ENSRNOG00000000582;ENSRNOG00000000658;ENSRNOG00000001293;ENSRNOG00000001391;ENSRNOG00000001738;ENSRNOG00000001967;ENSRNOG00000002186;ENSRNOG00000002292;ENSRNOG00000002341;ENSRNOG00000002358;ENSRNOG00000002636;ENSRNOG00000002701;ENSRNOG00000002735;ENSRNOG00000003147;ENSRNOG00000003261;ENSRNOG00000003302;ENSRNOG00000003809;…	2.43657e-20
GO:0009057	macromolecule catabolic process					133	1068	ENSRNOG00000000164;ENSRNOG00000001598;ENSRNOG00000001602;ENSRNOG00000001719;ENSRNOG00000001829;ENSRNOG00000002358;ENSRNOG00000002735;ENSRNOG00000002828;ENSRNOG00000003863;ENSRNOG00000004006;ENSRNOG00000004107;ENSRNOG00000004130;ENSRNOG00000004332;ENSRNOG00000004464;ENSRNOG00000004637;ENSRNOG00000004649;ENSRNOG00000004725;ENSRNOG00000004726;ENSRNOG00000005195;ENSRNOG00000005257;ENSRNOG00000005276;…	2.95856e-05	117	1068	ENSRNOG00000000164;ENSRNOG00000000422;ENSRNOG00000000438;ENSRNOG00000001293;ENSRNOG00000002292;ENSRNOG00000002341;ENSRNOG00000002358;ENSRNOG00000002735;ENSRNOG00000003261;ENSRNOG00000004100;ENSRNOG00000004464;ENSRNOG00000004725;ENSRNOG00000004726;ENSRNOG00000005257;ENSRNOG00000005276;ENSRNOG00000005310;ENSRNOG00000005333;ENSRNOG00000005542;ENSRNOG00000006067;ENSRNOG00000006302;ENSRNOG00000006326;…	6.54173e-07
GO:0009060	aerobic respiration					19	74	ENSRNOG00000003163;ENSRNOG00000004553;ENSRNOG00000005686;ENSRNOG00000007784;ENSRNOG00000007895;ENSRNOG00000008364;ENSRNOG00000010452;ENSRNOG00000012550;ENSRNOG00000013271;ENSRNOG00000013331;ENSRNOG00000014625;ENSRNOG00000016660;ENSRNOG00000017446;ENSRNOG00000018816;ENSRNOG00000023587;ENSRNOG00000024568;ENSRNOG00000024967;ENSRNOG00000030237;ENSRNOG00000055572	0.000208814	12	74	ENSRNOG00000004553;ENSRNOG00000007784;ENSRNOG00000007895;ENSRNOG00000008103;ENSRNOG00000008364;ENSRNOG00000009994;ENSRNOG00000013949;ENSRNOG00000014625;ENSRNOG00000017481;ENSRNOG00000023587;ENSRNOG00000030237;ENSRNOG00000034242	0.0349295
GO:0009062	fatty acid catabolic process					28	79	ENSRNOG00000000658;ENSRNOG00000001177;ENSRNOG00000004377;ENSRNOG00000006675;ENSRNOG00000006779;ENSRNOG00000008474;ENSRNOG00000008755;ENSRNOG00000009615;ENSRNOG00000009845;ENSRNOG00000010128;ENSRNOG00000011622;ENSRNOG00000011684;ENSRNOG00000012879;ENSRNOG00000014254;ENSRNOG00000014522;ENSRNOG00000014597;ENSRNOG00000015519;ENSRNOG00000017851;ENSRNOG00000018044;ENSRNOG00000018114;ENSRNOG00000018920;…	1.18414e-09	24	79	ENSRNOG00000000658;ENSRNOG00000004377;ENSRNOG00000004601;ENSRNOG00000006779;ENSRNOG00000008474;ENSRNOG00000008755;ENSRNOG00000009615;ENSRNOG00000009845;ENSRNOG00000010128;ENSRNOG00000011622;ENSRNOG00000014522;ENSRNOG00000015519;ENSRNOG00000018044;ENSRNOG00000018114;ENSRNOG00000018677;ENSRNOG00000018920;ENSRNOG00000019630;ENSRNOG00000020308;ENSRNOG00000024629;ENSRNOG00000028616;ENSRNOG00000028629;…	8.80698e-09
GO:0009069	serine family amino acid metabolic process					10	38	ENSRNOG00000000185;ENSRNOG00000001391;ENSRNOG00000002991;ENSRNOG00000006302;ENSRNOG00000006508;ENSRNOG00000007395;ENSRNOG00000011599;ENSRNOG00000016349;ENSRNOG00000017821;ENSRNOG00000026211	0.0123895	11	38	ENSRNOG00000000158;ENSRNOG00000001391;ENSRNOG00000005275;ENSRNOG00000006302;ENSRNOG00000007395;ENSRNOG00000011599;ENSRNOG00000013409;ENSRNOG00000016349;ENSRNOG00000017777;ENSRNOG00000017821;ENSRNOG00000050214	0.000613213
GO:0009074	aromatic amino acid family catabolic process					6	19	ENSRNOG00000003253;ENSRNOG00000003709;ENSRNOG00000013223;ENSRNOG00000016348;ENSRNOG00000029993;ENSRNOG00000031263	0.0410581	6	19	ENSRNOG00000002701;ENSRNOG00000005266;ENSRNOG00000010262;ENSRNOG00000011612;ENSRNOG00000013223;ENSRNOG00000029993	0.0153031
GO:0009127	purine nucleoside monophosphate biosynthetic process					30	168	ENSRNOG00000000064;ENSRNOG00000003626;ENSRNOG00000006589;ENSRNOG00000006807;ENSRNOG00000007235;ENSRNOG00000012325;ENSRNOG00000014625;ENSRNOG00000015290;ENSRNOG00000015320;ENSRNOG00000016660;ENSRNOG00000017895;ENSRNOG00000019223;ENSRNOG00000019742;ENSRNOG00000020420;ENSRNOG00000023150;ENSRNOG00000023587;ENSRNOG00000027049;ENSRNOG00000028884;ENSRNOG00000045738;ENSRNOG00000046763;ENSRNOG00000049497;…	0.0011211	21	168	ENSRNOG00000000064;ENSRNOG00000003302;ENSRNOG00000006589;ENSRNOG00000007235;ENSRNOG00000012325;ENSRNOG00000014625;ENSRNOG00000015320;ENSRNOG00000019742;ENSRNOG00000020420;ENSRNOG00000023150;ENSRNOG00000023587;ENSRNOG00000034242;ENSRNOG00000045738;ENSRNOG00000046763;ENSRNOG00000049912;ENSRNOG00000050585;ENSRNOG00000051151;ENSRNOG00000052802;ENSRNOG00000056076;ENSRNOG00000056457;ENSRNOG00000058249	0.0357843
GO:0009152	purine ribonucleotide biosynthetic process					47	239	ENSRNOG00000000064;ENSRNOG00000000658;ENSRNOG00000002671;ENSRNOG00000002693;ENSRNOG00000002928;ENSRNOG00000003626;ENSRNOG00000004172;ENSRNOG00000006331;ENSRNOG00000006589;ENSRNOG00000006807;ENSRNOG00000006947;ENSRNOG00000007235;ENSRNOG00000007895;ENSRNOG00000008572;ENSRNOG00000009565;ENSRNOG00000010580;ENSRNOG00000012325;ENSRNOG00000014522;ENSRNOG00000014625;ENSRNOG00000014684;ENSRNOG00000015290;…	9.34363e-07	35	239	ENSRNOG00000000064;ENSRNOG00000000658;ENSRNOG00000003302;ENSRNOG00000006589;ENSRNOG00000006947;ENSRNOG00000007235;ENSRNOG00000007895;ENSRNOG00000008572;ENSRNOG00000009565;ENSRNOG00000009994;ENSRNOG00000010580;ENSRNOG00000010633;ENSRNOG00000012325;ENSRNOG00000014522;ENSRNOG00000014625;ENSRNOG00000015320;ENSRNOG00000016924;ENSRNOG00000018755;ENSRNOG00000019180;ENSRNOG00000019742;ENSRNOG00000019918;…	0.000183553
GO:0009156	ribonucleoside monophosphate biosynthetic process					31	180	ENSRNOG00000000064;ENSRNOG00000001797;ENSRNOG00000003626;ENSRNOG00000006589;ENSRNOG00000006807;ENSRNOG00000007235;ENSRNOG00000012325;ENSRNOG00000014625;ENSRNOG00000015290;ENSRNOG00000015320;ENSRNOG00000016660;ENSRNOG00000017895;ENSRNOG00000019223;ENSRNOG00000019742;ENSRNOG00000020420;ENSRNOG00000023150;ENSRNOG00000023587;ENSRNOG00000027049;ENSRNOG00000028884;ENSRNOG00000045738;ENSRNOG00000046763;…	0.00162013	22	180	ENSRNOG00000000064;ENSRNOG00000001797;ENSRNOG00000003302;ENSRNOG00000006589;ENSRNOG00000007235;ENSRNOG00000012325;ENSRNOG00000014625;ENSRNOG00000015320;ENSRNOG00000019742;ENSRNOG00000020420;ENSRNOG00000023150;ENSRNOG00000023587;ENSRNOG00000034242;ENSRNOG00000045738;ENSRNOG00000046763;ENSRNOG00000049912;ENSRNOG00000050585;ENSRNOG00000051151;ENSRNOG00000052802;ENSRNOG00000056076;ENSRNOG00000056457;…	0.0377899
GO:0009165	nucleotide biosynthetic process					58	317	ENSRNOG00000000064;ENSRNOG00000000658;ENSRNOG00000001797;ENSRNOG00000002671;ENSRNOG00000002693;ENSRNOG00000002928;ENSRNOG00000003626;ENSRNOG00000003709;ENSRNOG00000004172;ENSRNOG00000004883;ENSRNOG00000006331;ENSRNOG00000006589;ENSRNOG00000006807;ENSRNOG00000006947;ENSRNOG00000007235;ENSRNOG00000007895;ENSRNOG00000008572;ENSRNOG00000009565;ENSRNOG00000009982;ENSRNOG00000010083;ENSRNOG00000010580;…	3.82283e-07	42	317	ENSRNOG00000000064;ENSRNOG00000000658;ENSRNOG00000001797;ENSRNOG00000003302;ENSRNOG00000006589;ENSRNOG00000006947;ENSRNOG00000007235;ENSRNOG00000007895;ENSRNOG00000008572;ENSRNOG00000009565;ENSRNOG00000009994;ENSRNOG00000010083;ENSRNOG00000010580;ENSRNOG00000010633;ENSRNOG00000011052;ENSRNOG00000012325;ENSRNOG00000013949;ENSRNOG00000014522;ENSRNOG00000014625;ENSRNOG00000015124;ENSRNOG00000015320;…	0.000267848
GO:0009168	purine ribonucleoside monophosphate biosynthetic process					30	168	ENSRNOG00000000064;ENSRNOG00000003626;ENSRNOG00000006589;ENSRNOG00000006807;ENSRNOG00000007235;ENSRNOG00000012325;ENSRNOG00000014625;ENSRNOG00000015290;ENSRNOG00000015320;ENSRNOG00000016660;ENSRNOG00000017895;ENSRNOG00000019223;ENSRNOG00000019742;ENSRNOG00000020420;ENSRNOG00000023150;ENSRNOG00000023587;ENSRNOG00000027049;ENSRNOG00000028884;ENSRNOG00000045738;ENSRNOG00000046763;ENSRNOG00000049497;…	0.0011211	21	168	ENSRNOG00000000064;ENSRNOG00000003302;ENSRNOG00000006589;ENSRNOG00000007235;ENSRNOG00000012325;ENSRNOG00000014625;ENSRNOG00000015320;ENSRNOG00000019742;ENSRNOG00000020420;ENSRNOG00000023150;ENSRNOG00000023587;ENSRNOG00000034242;ENSRNOG00000045738;ENSRNOG00000046763;ENSRNOG00000049912;ENSRNOG00000050585;ENSRNOG00000051151;ENSRNOG00000052802;ENSRNOG00000056076;ENSRNOG00000056457;ENSRNOG00000058249	0.0357843
GO:0009250	glucan biosynthetic process					10	38	ENSRNOG00000002642;ENSRNOG00000009615;ENSRNOG00000009845;ENSRNOG00000011474;ENSRNOG00000014597;ENSRNOG00000016214;ENSRNOG00000018494;ENSRNOG00000020254;ENSRNOG00000059753;ENSRNOG00000061527	0.0123895	8	38	ENSRNOG00000002642;ENSRNOG00000009615;ENSRNOG00000009845;ENSRNOG00000018494;ENSRNOG00000018677;ENSRNOG00000020254;ENSRNOG00000028629;ENSRNOG00000059753	0.0341298
GO:0009260	ribonucleotide biosynthetic process					48	251	ENSRNOG00000000064;ENSRNOG00000000658;ENSRNOG00000001797;ENSRNOG00000002671;ENSRNOG00000002693;ENSRNOG00000002928;ENSRNOG00000003626;ENSRNOG00000004172;ENSRNOG00000006331;ENSRNOG00000006589;ENSRNOG00000006807;ENSRNOG00000006947;ENSRNOG00000007235;ENSRNOG00000007895;ENSRNOG00000008572;ENSRNOG00000009565;ENSRNOG00000010580;ENSRNOG00000012325;ENSRNOG00000014522;ENSRNOG00000014625;ENSRNOG00000014684;…	1.5903e-06	36	251	ENSRNOG00000000064;ENSRNOG00000000658;ENSRNOG00000001797;ENSRNOG00000003302;ENSRNOG00000006589;ENSRNOG00000006947;ENSRNOG00000007235;ENSRNOG00000007895;ENSRNOG00000008572;ENSRNOG00000009565;ENSRNOG00000009994;ENSRNOG00000010580;ENSRNOG00000010633;ENSRNOG00000012325;ENSRNOG00000014522;ENSRNOG00000014625;ENSRNOG00000015320;ENSRNOG00000016924;ENSRNOG00000018755;ENSRNOG00000019180;ENSRNOG00000019742;…	0.000210672
GO:0009266	response to temperature stimulus					29	173	ENSRNOG00000000521;ENSRNOG00000000604;ENSRNOG00000000808;ENSRNOG00000001285;ENSRNOG00000002115;ENSRNOG00000005257;ENSRNOG00000006302;ENSRNOG00000006589;ENSRNOG00000007029;ENSRNOG00000007235;ENSRNOG00000007964;ENSRNOG00000008015;ENSRNOG00000009845;ENSRNOG00000009920;ENSRNOG00000010352;ENSRNOG00000012106;ENSRNOG00000014117;ENSRNOG00000014485;ENSRNOG00000014525;ENSRNOG00000016133;ENSRNOG00000018114;…	0.00383113	24	173	ENSRNOG00000000521;ENSRNOG00000000604;ENSRNOG00000001285;ENSRNOG00000002050;ENSRNOG00000005257;ENSRNOG00000006302;ENSRNOG00000006589;ENSRNOG00000007029;ENSRNOG00000007235;ENSRNOG00000009845;ENSRNOG00000012106;ENSRNOG00000014117;ENSRNOG00000014525;ENSRNOG00000015999;ENSRNOG00000018114;ENSRNOG00000020298;ENSRNOG00000020420;ENSRNOG00000026643;ENSRNOG00000034093;ENSRNOG00000034242;ENSRNOG00000046727;…	0.00667484
GO:0009408	response to heat					24	112	ENSRNOG00000000521;ENSRNOG00000000604;ENSRNOG00000000808;ENSRNOG00000001285;ENSRNOG00000002115;ENSRNOG00000005257;ENSRNOG00000006302;ENSRNOG00000006589;ENSRNOG00000007029;ENSRNOG00000007964;ENSRNOG00000009920;ENSRNOG00000012106;ENSRNOG00000014117;ENSRNOG00000014485;ENSRNOG00000014525;ENSRNOG00000016133;ENSRNOG00000020298;ENSRNOG00000020420;ENSRNOG00000026643;ENSRNOG00000046727;ENSRNOG00000050647;…	0.00035315	20	112	ENSRNOG00000000521;ENSRNOG00000000604;ENSRNOG00000001285;ENSRNOG00000002050;ENSRNOG00000005257;ENSRNOG00000006302;ENSRNOG00000006589;ENSRNOG00000007029;ENSRNOG00000012106;ENSRNOG00000014117;ENSRNOG00000014525;ENSRNOG00000020298;ENSRNOG00000020420;ENSRNOG00000026643;ENSRNOG00000034093;ENSRNOG00000034242;ENSRNOG00000046727;ENSRNOG00000052802;ENSRNOG00000056076;ENSRNOG00000059714	0.000893733
GO:0009410	response to xenobiotic stimulus					42	258	ENSRNOG00000000604;ENSRNOG00000000796;ENSRNOG00000000853;ENSRNOG00000001926;ENSRNOG00000002115;ENSRNOG00000002636;ENSRNOG00000002818;ENSRNOG00000002991;ENSRNOG00000004060;ENSRNOG00000004332;ENSRNOG00000004342;ENSRNOG00000006302;ENSRNOG00000007041;ENSRNOG00000007395;ENSRNOG00000007649;ENSRNOG00000008012;ENSRNOG00000008988;ENSRNOG00000009568;ENSRNOG00000009615;ENSRNOG00000010746;ENSRNOG00000012458;…	0.000455063	42	258	ENSRNOG00000000158;ENSRNOG00000000604;ENSRNOG00000000796;ENSRNOG00000001926;ENSRNOG00000001967;ENSRNOG00000002636;ENSRNOG00000002818;ENSRNOG00000004060;ENSRNOG00000004342;ENSRNOG00000006302;ENSRNOG00000007395;ENSRNOG00000008012;ENSRNOG00000008837;ENSRNOG00000008988;ENSRNOG00000009568;ENSRNOG00000009615;ENSRNOG00000009882;ENSRNOG00000010633;ENSRNOG00000010746;ENSRNOG00000011612;ENSRNOG00000012458;…	1.92828e-06
GO:0009605	response to external stimulus					214	2097	ENSRNOG00000000164;ENSRNOG00000000165;ENSRNOG00000000322;ENSRNOG00000000521;ENSRNOG00000000604;ENSRNOG00000000658;ENSRNOG00000000814;ENSRNOG00000000853;ENSRNOG00000000967;ENSRNOG00000001007;ENSRNOG00000001189;ENSRNOG00000001239;ENSRNOG00000001269;ENSRNOG00000001285;ENSRNOG00000001415;ENSRNOG00000001420;ENSRNOG00000001524;ENSRNOG00000001710;ENSRNOG00000001889;ENSRNOG00000001926;ENSRNOG00000001963;…	0.00706386	183	2097	ENSRNOG00000000164;ENSRNOG00000000165;ENSRNOG00000000438;ENSRNOG00000000521;ENSRNOG00000000604;ENSRNOG00000000658;ENSRNOG00000000967;ENSRNOG00000001007;ENSRNOG00000001050;ENSRNOG00000001239;ENSRNOG00000001269;ENSRNOG00000001285;ENSRNOG00000001415;ENSRNOG00000001710;ENSRNOG00000001738;ENSRNOG00000001926;ENSRNOG00000001963;ENSRNOG00000001979;ENSRNOG00000001989;ENSRNOG00000002052;ENSRNOG00000002278;…	0.000322805
GO:0009611	response to wounding					58	447	ENSRNOG00000000053;ENSRNOG00000000521;ENSRNOG00000000853;ENSRNOG00000002115;ENSRNOG00000002278;ENSRNOG00000002536;ENSRNOG00000002636;ENSRNOG00000002783;ENSRNOG00000002794;ENSRNOG00000003430;ENSRNOG00000004332;ENSRNOG00000005195;ENSRNOG00000005614;ENSRNOG00000005796;ENSRNOG00000006589;ENSRNOG00000007457;ENSRNOG00000009615;ENSRNOG00000009884;ENSRNOG00000010362;ENSRNOG00000012207;ENSRNOG00000012473;…	0.00673157	46	447	ENSRNOG00000000053;ENSRNOG00000000521;ENSRNOG00000002278;ENSRNOG00000002636;ENSRNOG00000002783;ENSRNOG00000002794;ENSRNOG00000003430;ENSRNOG00000005796;ENSRNOG00000006380;ENSRNOG00000006589;ENSRNOG00000007457;ENSRNOG00000007990;ENSRNOG00000009615;ENSRNOG00000012826;ENSRNOG00000012999;ENSRNOG00000013133;ENSRNOG00000014117;ENSRNOG00000014288;ENSRNOG00000014294;ENSRNOG00000014297;ENSRNOG00000015139;…	0.018339
GO:0009628	response to abiotic stimulus					127	1036	ENSRNOG00000000053;ENSRNOG00000000521;ENSRNOG00000000604;ENSRNOG00000000808;ENSRNOG00000000853;ENSRNOG00000001189;ENSRNOG00000001269;ENSRNOG00000001285;ENSRNOG00000001420;ENSRNOG00000001582;ENSRNOG00000001926;ENSRNOG00000001979;ENSRNOG00000002115;ENSRNOG00000002636;ENSRNOG00000003709;ENSRNOG00000003977;ENSRNOG00000004332;ENSRNOG00000004364;ENSRNOG00000004649;ENSRNOG00000005195;ENSRNOG00000005257;…	0.000108964	110	1036	ENSRNOG00000000053;ENSRNOG00000000521;ENSRNOG00000000604;ENSRNOG00000001229;ENSRNOG00000001269;ENSRNOG00000001285;ENSRNOG00000001926;ENSRNOG00000001979;ENSRNOG00000002050;ENSRNOG00000002292;ENSRNOG00000002636;ENSRNOG00000003977;ENSRNOG00000004294;ENSRNOG00000005257;ENSRNOG00000005615;ENSRNOG00000006067;ENSRNOG00000006302;ENSRNOG00000006305;ENSRNOG00000006392;ENSRNOG00000006589;ENSRNOG00000006622;…	7.32154e-06
GO:0009636	response to toxic substance					88	523	ENSRNOG00000000053;ENSRNOG00000000521;ENSRNOG00000000571;ENSRNOG00000000604;ENSRNOG00000000796;ENSRNOG00000000967;ENSRNOG00000001420;ENSRNOG00000001926;ENSRNOG00000002115;ENSRNOG00000002636;ENSRNOG00000003515;ENSRNOG00000003563;ENSRNOG00000003763;ENSRNOG00000003844;ENSRNOG00000003977;ENSRNOG00000004060;ENSRNOG00000004245;ENSRNOG00000004959;ENSRNOG00000005195;ENSRNOG00000005418;ENSRNOG00000006589;…	6.6812e-09	66	523	ENSRNOG00000000053;ENSRNOG00000000158;ENSRNOG00000000521;ENSRNOG00000000604;ENSRNOG00000000796;ENSRNOG00000000967;ENSRNOG00000001738;ENSRNOG00000001890;ENSRNOG00000001926;ENSRNOG00000002636;ENSRNOG00000003563;ENSRNOG00000003977;ENSRNOG00000004060;ENSRNOG00000006067;ENSRNOG00000006589;ENSRNOG00000007139;ENSRNOG00000007235;ENSRNOG00000008012;ENSRNOG00000008364;ENSRNOG00000008510;ENSRNOG00000008837;…	7.2783e-06
GO:0009651	response to salt stress					8	32	ENSRNOG00000001926;ENSRNOG00000003709;ENSRNOG00000008012;ENSRNOG00000016427;ENSRNOG00000019834;ENSRNOG00000020876;ENSRNOG00000058646;ENSRNOG00000059714	0.0448697	8	32	ENSRNOG00000001926;ENSRNOG00000006392;ENSRNOG00000008012;ENSRNOG00000016427;ENSRNOG00000019834;ENSRNOG00000047781;ENSRNOG00000058646;ENSRNOG00000059714	0.0131278
GO:0009719	response to endogenous stimulus					187	1488	ENSRNOG00000000053;ENSRNOG00000000165;ENSRNOG00000000521;ENSRNOG00000000604;ENSRNOG00000000847;ENSRNOG00000000853;ENSRNOG00000000967;ENSRNOG00000000989;ENSRNOG00000001007;ENSRNOG00000001148;ENSRNOG00000001420;ENSRNOG00000001436;ENSRNOG00000001585;ENSRNOG00000001926;ENSRNOG00000002115;ENSRNOG00000002393;ENSRNOG00000002478;ENSRNOG00000002572;ENSRNOG00000002642;ENSRNOG00000002671;ENSRNOG00000002693;…	1.07544e-07	153	1488	ENSRNOG00000000053;ENSRNOG00000000158;ENSRNOG00000000165;ENSRNOG00000000521;ENSRNOG00000000604;ENSRNOG00000000967;ENSRNOG00000001007;ENSRNOG00000001314;ENSRNOG00000001436;ENSRNOG00000001926;ENSRNOG00000002050;ENSRNOG00000002292;ENSRNOG00000002393;ENSRNOG00000002478;ENSRNOG00000002572;ENSRNOG00000002642;ENSRNOG00000002946;ENSRNOG00000003261;ENSRNOG00000003302;ENSRNOG00000003977;ENSRNOG00000004060;…	2.47893e-07
GO:0009743	response to carbohydrate					36	225	ENSRNOG00000000967;ENSRNOG00000001420;ENSRNOG00000002671;ENSRNOG00000002693;ENSRNOG00000003500;ENSRNOG00000004649;ENSRNOG00000005195;ENSRNOG00000005257;ENSRNOG00000005542;ENSRNOG00000005614;ENSRNOG00000006302;ENSRNOG00000007229;ENSRNOG00000007916;ENSRNOG00000008047;ENSRNOG00000008364;ENSRNOG00000009488;ENSRNOG00000009884;ENSRNOG00000012840;ENSRNOG00000013536;ENSRNOG00000016723;ENSRNOG00000017693;…	0.00207524	34	225	ENSRNOG00000000967;ENSRNOG00000005257;ENSRNOG00000005542;ENSRNOG00000006302;ENSRNOG00000006989;ENSRNOG00000007229;ENSRNOG00000008047;ENSRNOG00000008364;ENSRNOG00000008578;ENSRNOG00000009488;ENSRNOG00000009882;ENSRNOG00000013409;ENSRNOG00000013507;ENSRNOG00000013536;ENSRNOG00000016122;ENSRNOG00000017693;ENSRNOG00000017702;ENSRNOG00000018233;ENSRNOG00000018237;ENSRNOG00000018566;ENSRNOG00000019113;…	0.000127258
GO:0009746	response to hexose					28	190	ENSRNOG00000000967;ENSRNOG00000001420;ENSRNOG00000002671;ENSRNOG00000002693;ENSRNOG00000003500;ENSRNOG00000005257;ENSRNOG00000005614;ENSRNOG00000006302;ENSRNOG00000007229;ENSRNOG00000007916;ENSRNOG00000008047;ENSRNOG00000009488;ENSRNOG00000009884;ENSRNOG00000013536;ENSRNOG00000016723;ENSRNOG00000017693;ENSRNOG00000019113;ENSRNOG00000019302;ENSRNOG00000019587;ENSRNOG00000019752;ENSRNOG00000020420;…	0.0262173	28	190	ENSRNOG00000000967;ENSRNOG00000005257;ENSRNOG00000006302;ENSRNOG00000006989;ENSRNOG00000007229;ENSRNOG00000008047;ENSRNOG00000008578;ENSRNOG00000009488;ENSRNOG00000009882;ENSRNOG00000013409;ENSRNOG00000013507;ENSRNOG00000013536;ENSRNOG00000016122;ENSRNOG00000017693;ENSRNOG00000017702;ENSRNOG00000018233;ENSRNOG00000018566;ENSRNOG00000019113;ENSRNOG00000019422;ENSRNOG00000019587;ENSRNOG00000020420;…	0.0010513
GO:0009749	response to glucose					27	187	ENSRNOG00000000967;ENSRNOG00000001420;ENSRNOG00000002671;ENSRNOG00000002693;ENSRNOG00000003500;ENSRNOG00000005257;ENSRNOG00000005614;ENSRNOG00000006302;ENSRNOG00000007229;ENSRNOG00000007916;ENSRNOG00000008047;ENSRNOG00000009488;ENSRNOG00000009884;ENSRNOG00000013536;ENSRNOG00000016723;ENSRNOG00000019113;ENSRNOG00000019302;ENSRNOG00000019587;ENSRNOG00000019752;ENSRNOG00000020420;ENSRNOG00000020723;…	0.0379209	27	187	ENSRNOG00000000967;ENSRNOG00000005257;ENSRNOG00000006302;ENSRNOG00000006989;ENSRNOG00000007229;ENSRNOG00000008047;ENSRNOG00000008578;ENSRNOG00000009488;ENSRNOG00000009882;ENSRNOG00000013409;ENSRNOG00000013507;ENSRNOG00000013536;ENSRNOG00000016122;ENSRNOG00000017702;ENSRNOG00000018233;ENSRNOG00000018566;ENSRNOG00000019113;ENSRNOG00000019422;ENSRNOG00000019587;ENSRNOG00000020420;ENSRNOG00000020679;…	0.00189005
GO:0009892	negative regulation of metabolic process					247	2390	ENSRNOG00000000053;ENSRNOG00000000068;ENSRNOG00000000322;ENSRNOG00000000397;ENSRNOG00000000467;ENSRNOG00000000488;ENSRNOG00000000521;ENSRNOG00000000604;ENSRNOG00000000658;ENSRNOG00000000853;ENSRNOG00000001139;ENSRNOG00000001189;ENSRNOG00000001524;ENSRNOG00000001582;ENSRNOG00000001585;ENSRNOG00000001806;ENSRNOG00000001889;ENSRNOG00000002115;ENSRNOG00000002389;ENSRNOG00000002393;ENSRNOG00000002478;…	0.00138919	188	2390	ENSRNOG00000000053;ENSRNOG00000000068;ENSRNOG00000000397;ENSRNOG00000000422;ENSRNOG00000000438;ENSRNOG00000000521;ENSRNOG00000000604;ENSRNOG00000000658;ENSRNOG00000001050;ENSRNOG00000001647;ENSRNOG00000001738;ENSRNOG00000002292;ENSRNOG00000002389;ENSRNOG00000002393;ENSRNOG00000002478;ENSRNOG00000002618;ENSRNOG00000002735;ENSRNOG00000002783;ENSRNOG00000002946;ENSRNOG00000003147;ENSRNOG00000003232;…	0.0261021
GO:0009893	positive regulation of metabolic process					305	3035	ENSRNOG00000000053;ENSRNOG00000000068;ENSRNOG00000000165;ENSRNOG00000000397;ENSRNOG00000000411;ENSRNOG00000000488;ENSRNOG00000000521;ENSRNOG00000000527;ENSRNOG00000000571;ENSRNOG00000000604;ENSRNOG00000000796;ENSRNOG00000000799;ENSRNOG00000000808;ENSRNOG00000000841;ENSRNOG00000000847;ENSRNOG00000000853;ENSRNOG00000000923;ENSRNOG00000000989;ENSRNOG00000001030;ENSRNOG00000001142;ENSRNOG00000001172;…	0.00137572	261	3035	ENSRNOG00000000053;ENSRNOG00000000068;ENSRNOG00000000165;ENSRNOG00000000397;ENSRNOG00000000422;ENSRNOG00000000521;ENSRNOG00000000527;ENSRNOG00000000604;ENSRNOG00000000796;ENSRNOG00000000799;ENSRNOG00000001030;ENSRNOG00000001142;ENSRNOG00000001647;ENSRNOG00000001738;ENSRNOG00000002278;ENSRNOG00000002292;ENSRNOG00000002389;ENSRNOG00000002456;ENSRNOG00000002478;ENSRNOG00000002520;ENSRNOG00000002572;…	1.17595e-05
GO:0009894	regulation of catabolic process					110	712	ENSRNOG00000000658;ENSRNOG00000001719;ENSRNOG00000001829;ENSRNOG00000002225;ENSRNOG00000002735;ENSRNOG00000002828;ENSRNOG00000003500;ENSRNOG00000003649;ENSRNOG00000004107;ENSRNOG00000004332;ENSRNOG00000004637;ENSRNOG00000004649;ENSRNOG00000004726;ENSRNOG00000005195;ENSRNOG00000005257;ENSRNOG00000005276;ENSRNOG00000005528;ENSRNOG00000005618;ENSRNOG00000006302;ENSRNOG00000006326;ENSRNOG00000006328;…	6.21161e-09	83	712	ENSRNOG00000000422;ENSRNOG00000000438;ENSRNOG00000000658;ENSRNOG00000001738;ENSRNOG00000002292;ENSRNOG00000002735;ENSRNOG00000003302;ENSRNOG00000004100;ENSRNOG00000004726;ENSRNOG00000005257;ENSRNOG00000005276;ENSRNOG00000005333;ENSRNOG00000005861;ENSRNOG00000006067;ENSRNOG00000006302;ENSRNOG00000006326;ENSRNOG00000006375;ENSRNOG00000006420;ENSRNOG00000006589;ENSRNOG00000007529;ENSRNOG00000008551;…	6.18196e-06
GO:0009895	negative regulation of catabolic process					44	236	ENSRNOG00000000658;ENSRNOG00000002735;ENSRNOG00000002828;ENSRNOG00000003500;ENSRNOG00000003649;ENSRNOG00000004107;ENSRNOG00000004332;ENSRNOG00000004649;ENSRNOG00000004726;ENSRNOG00000005195;ENSRNOG00000005618;ENSRNOG00000006326;ENSRNOG00000007916;ENSRNOG00000008639;ENSRNOG00000009252;ENSRNOG00000009615;ENSRNOG00000009977;ENSRNOG00000010362;ENSRNOG00000010479;ENSRNOG00000012314;ENSRNOG00000014117;…	1.04377e-05	31	236	ENSRNOG00000000438;ENSRNOG00000000658;ENSRNOG00000001738;ENSRNOG00000002292;ENSRNOG00000002735;ENSRNOG00000004726;ENSRNOG00000005333;ENSRNOG00000006326;ENSRNOG00000006420;ENSRNOG00000007529;ENSRNOG00000008551;ENSRNOG00000008639;ENSRNOG00000009252;ENSRNOG00000009615;ENSRNOG00000010799;ENSRNOG00000012314;ENSRNOG00000014117;ENSRNOG00000015206;ENSRNOG00000015999;ENSRNOG00000016122;ENSRNOG00000016309;…	0.00309458
GO:0009896	positive regulation of catabolic process					55	377	ENSRNOG00000001829;ENSRNOG00000002828;ENSRNOG00000003500;ENSRNOG00000004637;ENSRNOG00000004649;ENSRNOG00000005276;ENSRNOG00000005528;ENSRNOG00000006302;ENSRNOG00000006328;ENSRNOG00000006589;ENSRNOG00000006675;ENSRNOG00000007916;ENSRNOG00000007964;ENSRNOG00000008639;ENSRNOG00000009887;ENSRNOG00000011414;ENSRNOG00000011910;ENSRNOG00000011951;ENSRNOG00000012026;ENSRNOG00000012237;ENSRNOG00000013948;…	0.000642657	44	377	ENSRNOG00000000422;ENSRNOG00000002292;ENSRNOG00000003302;ENSRNOG00000004100;ENSRNOG00000005276;ENSRNOG00000006302;ENSRNOG00000006589;ENSRNOG00000008639;ENSRNOG00000009946;ENSRNOG00000011414;ENSRNOG00000011728;ENSRNOG00000011910;ENSRNOG00000012026;ENSRNOG00000014117;ENSRNOG00000014204;ENSRNOG00000016456;ENSRNOG00000016460;ENSRNOG00000016496;ENSRNOG00000017106;ENSRNOG00000017702;ENSRNOG00000017941;…	0.00255207
GO:0009991	response to extracellular stimulus					87	538	ENSRNOG00000000164;ENSRNOG00000000165;ENSRNOG00000000322;ENSRNOG00000000521;ENSRNOG00000000658;ENSRNOG00000000853;ENSRNOG00000000967;ENSRNOG00000001189;ENSRNOG00000001420;ENSRNOG00000001524;ENSRNOG00000001889;ENSRNOG00000002115;ENSRNOG00000002783;ENSRNOG00000002911;ENSRNOG00000003745;ENSRNOG00000004172;ENSRNOG00000004332;ENSRNOG00000004649;ENSRNOG00000005195;ENSRNOG00000005614;ENSRNOG00000006302;…	5.51939e-08	73	538	ENSRNOG00000000164;ENSRNOG00000000165;ENSRNOG00000000521;ENSRNOG00000000658;ENSRNOG00000000967;ENSRNOG00000001050;ENSRNOG00000001738;ENSRNOG00000002341;ENSRNOG00000002783;ENSRNOG00000004294;ENSRNOG00000005861;ENSRNOG00000006067;ENSRNOG00000006302;ENSRNOG00000006305;ENSRNOG00000006589;ENSRNOG00000007139;ENSRNOG00000007235;ENSRNOG00000007990;ENSRNOG00000008012;ENSRNOG00000008364;ENSRNOG00000008837;…	1.05853e-07
GO:0010033	response to organic substance					324	2793	ENSRNOG00000000053;ENSRNOG00000000165;ENSRNOG00000000411;ENSRNOG00000000521;ENSRNOG00000000571;ENSRNOG00000000604;ENSRNOG00000000658;ENSRNOG00000000796;ENSRNOG00000000847;ENSRNOG00000000853;ENSRNOG00000000967;ENSRNOG00000000989;ENSRNOG00000001007;ENSRNOG00000001148;ENSRNOG00000001285;ENSRNOG00000001420;ENSRNOG00000001436;ENSRNOG00000001585;ENSRNOG00000001889;ENSRNOG00000001926;ENSRNOG00000001963;…	1.06054e-09	274	2793	ENSRNOG00000000053;ENSRNOG00000000158;ENSRNOG00000000165;ENSRNOG00000000438;ENSRNOG00000000521;ENSRNOG00000000604;ENSRNOG00000000658;ENSRNOG00000000796;ENSRNOG00000000967;ENSRNOG00000001007;ENSRNOG00000001285;ENSRNOG00000001293;ENSRNOG00000001314;ENSRNOG00000001436;ENSRNOG00000001738;ENSRNOG00000001926;ENSRNOG00000001963;ENSRNOG00000002050;ENSRNOG00000002292;ENSRNOG00000002341;ENSRNOG00000002393;…	1.15617e-11
GO:0010035	response to inorganic substance					84	544	ENSRNOG00000000053;ENSRNOG00000000571;ENSRNOG00000000604;ENSRNOG00000001148;ENSRNOG00000001420;ENSRNOG00000001926;ENSRNOG00000002115;ENSRNOG00000002251;ENSRNOG00000002572;ENSRNOG00000002636;ENSRNOG00000003253;ENSRNOG00000003977;ENSRNOG00000004332;ENSRNOG00000005195;ENSRNOG00000005418;ENSRNOG00000005542;ENSRNOG00000006302;ENSRNOG00000006589;ENSRNOG00000006675;ENSRNOG00000006997;ENSRNOG00000007041;…	7.63055e-07	70	544	ENSRNOG00000000053;ENSRNOG00000000604;ENSRNOG00000001229;ENSRNOG00000001926;ENSRNOG00000002251;ENSRNOG00000002292;ENSRNOG00000002572;ENSRNOG00000002636;ENSRNOG00000003977;ENSRNOG00000004294;ENSRNOG00000005542;ENSRNOG00000005849;ENSRNOG00000006067;ENSRNOG00000006302;ENSRNOG00000006589;ENSRNOG00000007089;ENSRNOG00000008012;ENSRNOG00000008047;ENSRNOG00000008364;ENSRNOG00000008837;ENSRNOG00000009882;…	1.73098e-06
GO:0010039	response to iron ion					9	34	ENSRNOG00000002636;ENSRNOG00000007041;ENSRNOG00000013271;ENSRNOG00000014117;ENSRNOG00000015206;ENSRNOG00000016967;ENSRNOG00000017123;ENSRNOG00000025443;ENSRNOG00000056728	0.0199582	8	34	ENSRNOG00000002636;ENSRNOG00000005849;ENSRNOG00000014117;ENSRNOG00000015206;ENSRNOG00000016967;ENSRNOG00000020918;ENSRNOG00000025443;ENSRNOG00000056728	0.018339
GO:0010243	response to organonitrogen compound					143	932	ENSRNOG00000000165;ENSRNOG00000000521;ENSRNOG00000000604;ENSRNOG00000000796;ENSRNOG00000000853;ENSRNOG00000000967;ENSRNOG00000001007;ENSRNOG00000001148;ENSRNOG00000001420;ENSRNOG00000001436;ENSRNOG00000002115;ENSRNOG00000002393;ENSRNOG00000002478;ENSRNOG00000002572;ENSRNOG00000002636;ENSRNOG00000002671;ENSRNOG00000002693;ENSRNOG00000002818;ENSRNOG00000002991;ENSRNOG00000003253;ENSRNOG00000003256;…	1.88263e-11	128	932	ENSRNOG00000000158;ENSRNOG00000000165;ENSRNOG00000000438;ENSRNOG00000000521;ENSRNOG00000000604;ENSRNOG00000000796;ENSRNOG00000000967;ENSRNOG00000001007;ENSRNOG00000001293;ENSRNOG00000001436;ENSRNOG00000002292;ENSRNOG00000002341;ENSRNOG00000002393;ENSRNOG00000002478;ENSRNOG00000002572;ENSRNOG00000002636;ENSRNOG00000002818;ENSRNOG00000002946;ENSRNOG00000003256;ENSRNOG00000003977;ENSRNOG00000004060;…	4.06725e-14
GO:0010498	proteasomal protein catabolic process					53	403	ENSRNOG00000001602;ENSRNOG00000001719;ENSRNOG00000001829;ENSRNOG00000004006;ENSRNOG00000004130;ENSRNOG00000004464;ENSRNOG00000005257;ENSRNOG00000005310;ENSRNOG00000006302;ENSRNOG00000006328;ENSRNOG00000006751;ENSRNOG00000007114;ENSRNOG00000008214;ENSRNOG00000008604;ENSRNOG00000009887;ENSRNOG00000011414;ENSRNOG00000011951;ENSRNOG00000011987;ENSRNOG00000012026;ENSRNOG00000012911;ENSRNOG00000014448;…	0.00826087	48	403	ENSRNOG00000000438;ENSRNOG00000001293;ENSRNOG00000002341;ENSRNOG00000004100;ENSRNOG00000004464;ENSRNOG00000005257;ENSRNOG00000005310;ENSRNOG00000006302;ENSRNOG00000006345;ENSRNOG00000008214;ENSRNOG00000010727;ENSRNOG00000011414;ENSRNOG00000012026;ENSRNOG00000012862;ENSRNOG00000012911;ENSRNOG00000013763;ENSRNOG00000014097;ENSRNOG00000014448;ENSRNOG00000014901;ENSRNOG00000014986;ENSRNOG00000015206;…	0.000903044
GO:0010565	regulation of cellular ketone metabolic process					27	97	ENSRNOG00000000658;ENSRNOG00000001889;ENSRNOG00000002478;ENSRNOG00000003228;ENSRNOG00000004172;ENSRNOG00000004649;ENSRNOG00000006331;ENSRNOG00000006675;ENSRNOG00000008377;ENSRNOG00000009488;ENSRNOG00000009565;ENSRNOG00000009615;ENSRNOG00000012879;ENSRNOG00000012911;ENSRNOG00000014254;ENSRNOG00000014522;ENSRNOG00000014597;ENSRNOG00000017866;ENSRNOG00000018114;ENSRNOG00000018289;ENSRNOG00000018402;…	6.57714e-07	20	97	ENSRNOG00000000658;ENSRNOG00000002478;ENSRNOG00000003228;ENSRNOG00000008377;ENSRNOG00000009488;ENSRNOG00000009565;ENSRNOG00000009615;ENSRNOG00000012911;ENSRNOG00000013763;ENSRNOG00000014522;ENSRNOG00000017866;ENSRNOG00000018114;ENSRNOG00000018677;ENSRNOG00000019422;ENSRNOG00000020578;ENSRNOG00000020853;ENSRNOG00000028629;ENSRNOG00000034116;ENSRNOG00000046889;ENSRNOG00000047503	0.000127258
GO:0010608	posttranscriptional regulation of gene expression					47	356	ENSRNOG00000000150;ENSRNOG00000000799;ENSRNOG00000000841;ENSRNOG00000001598;ENSRNOG00000001602;ENSRNOG00000002393;ENSRNOG00000002735;ENSRNOG00000002828;ENSRNOG00000004332;ENSRNOG00000004726;ENSRNOG00000005418;ENSRNOG00000006990;ENSRNOG00000006997;ENSRNOG00000009152;ENSRNOG00000009615;ENSRNOG00000009977;ENSRNOG00000010218;ENSRNOG00000010352;ENSRNOG00000011910;ENSRNOG00000012582;ENSRNOG00000012954;…	0.0134654	39	356	ENSRNOG00000000150;ENSRNOG00000000422;ENSRNOG00000000799;ENSRNOG00000001050;ENSRNOG00000001738;ENSRNOG00000002292;ENSRNOG00000002393;ENSRNOG00000002735;ENSRNOG00000004726;ENSRNOG00000005275;ENSRNOG00000005849;ENSRNOG00000006420;ENSRNOG00000009152;ENSRNOG00000009446;ENSRNOG00000009615;ENSRNOG00000009882;ENSRNOG00000010218;ENSRNOG00000010799;ENSRNOG00000011728;ENSRNOG00000011910;ENSRNOG00000012954;…	0.0145391
GO:0010675	regulation of cellular carbohydrate metabolic process					22	113	ENSRNOG00000000165;ENSRNOG00000000658;ENSRNOG00000000796;ENSRNOG00000001189;ENSRNOG00000002225;ENSRNOG00000003712;ENSRNOG00000004172;ENSRNOG00000006622;ENSRNOG00000008047;ENSRNOG00000009565;ENSRNOG00000009615;ENSRNOG00000009845;ENSRNOG00000011474;ENSRNOG00000014522;ENSRNOG00000014565;ENSRNOG00000014597;ENSRNOG00000016349;ENSRNOG00000019742;ENSRNOG00000036692;ENSRNOG00000050585;ENSRNOG00000051592;…	0.00270346	17	113	ENSRNOG00000000165;ENSRNOG00000000658;ENSRNOG00000000796;ENSRNOG00000005861;ENSRNOG00000006622;ENSRNOG00000008047;ENSRNOG00000009565;ENSRNOG00000009615;ENSRNOG00000009845;ENSRNOG00000014522;ENSRNOG00000014565;ENSRNOG00000016349;ENSRNOG00000018677;ENSRNOG00000019742;ENSRNOG00000028629;ENSRNOG00000048874;ENSRNOG00000050585	0.0151937
GO:0010876	lipid localization					45	330	ENSRNOG00000000411;ENSRNOG00000000571;ENSRNOG00000000658;ENSRNOG00000001585;ENSRNOG00000002225;ENSRNOG00000002393;ENSRNOG00000003472;ENSRNOG00000003500;ENSRNOG00000004040;ENSRNOG00000004649;ENSRNOG00000005542;ENSRNOG00000006338;ENSRNOG00000006622;ENSRNOG00000006675;ENSRNOG00000006779;ENSRNOG00000007139;ENSRNOG00000008012;ENSRNOG00000010128;ENSRNOG00000010362;ENSRNOG00000010895;ENSRNOG00000012879;…	0.0095469	44	330	ENSRNOG00000000096;ENSRNOG00000000658;ENSRNOG00000000665;ENSRNOG00000001782;ENSRNOG00000002393;ENSRNOG00000005542;ENSRNOG00000005794;ENSRNOG00000006622;ENSRNOG00000006779;ENSRNOG00000007060;ENSRNOG00000007139;ENSRNOG00000008012;ENSRNOG00000009005;ENSRNOG00000009946;ENSRNOG00000010128;ENSRNOG00000010633;ENSRNOG00000010895;ENSRNOG00000011728;ENSRNOG00000014532;ENSRNOG00000014604;ENSRNOG00000015518;…	0.000151905
GO:0010906	regulation of glucose metabolic process					19	90	ENSRNOG00000000165;ENSRNOG00000000658;ENSRNOG00000000796;ENSRNOG00000001189;ENSRNOG00000003712;ENSRNOG00000004172;ENSRNOG00000006622;ENSRNOG00000008047;ENSRNOG00000009565;ENSRNOG00000009615;ENSRNOG00000009845;ENSRNOG00000011474;ENSRNOG00000014522;ENSRNOG00000014565;ENSRNOG00000014597;ENSRNOG00000016349;ENSRNOG00000036692;ENSRNOG00000051592;ENSRNOG00000061527	0.00256734	14	90	ENSRNOG00000000165;ENSRNOG00000000658;ENSRNOG00000000796;ENSRNOG00000006622;ENSRNOG00000008047;ENSRNOG00000009565;ENSRNOG00000009615;ENSRNOG00000009845;ENSRNOG00000014522;ENSRNOG00000014565;ENSRNOG00000016349;ENSRNOG00000018677;ENSRNOG00000028629;ENSRNOG00000048874	0.0258363
GO:0010941	regulation of cell death					162	1353	ENSRNOG00000000322;ENSRNOG00000000521;ENSRNOG00000000527;ENSRNOG00000000571;ENSRNOG00000000827;ENSRNOG00000000853;ENSRNOG00000001139;ENSRNOG00000001271;ENSRNOG00000001420;ENSRNOG00000001829;ENSRNOG00000002115;ENSRNOG00000002572;ENSRNOG00000002618;ENSRNOG00000002642;ENSRNOG00000002671;ENSRNOG00000002911;ENSRNOG00000003223;ENSRNOG00000003232;ENSRNOG00000003256;ENSRNOG00000003497;ENSRNOG00000003689;…	2.18985e-05	118	1353	ENSRNOG00000000521;ENSRNOG00000000527;ENSRNOG00000000827;ENSRNOG00000001738;ENSRNOG00000002572;ENSRNOG00000002618;ENSRNOG00000002642;ENSRNOG00000002946;ENSRNOG00000003232;ENSRNOG00000003256;ENSRNOG00000003302;ENSRNOG00000003977;ENSRNOG00000004284;ENSRNOG00000004294;ENSRNOG00000004964;ENSRNOG00000005276;ENSRNOG00000005615;ENSRNOG00000005796;ENSRNOG00000005882;ENSRNOG00000006067;ENSRNOG00000006302;…	0.00832542
GO:0012501	programmed cell death					175	1517	ENSRNOG00000000322;ENSRNOG00000000521;ENSRNOG00000000527;ENSRNOG00000000827;ENSRNOG00000000853;ENSRNOG00000001139;ENSRNOG00000001189;ENSRNOG00000001271;ENSRNOG00000001420;ENSRNOG00000001829;ENSRNOG00000002115;ENSRNOG00000002618;ENSRNOG00000002671;ENSRNOG00000002911;ENSRNOG00000003147;ENSRNOG00000003223;ENSRNOG00000003232;ENSRNOG00000003256;ENSRNOG00000003497;ENSRNOG00000003689;ENSRNOG00000003745;…	7.37142e-05	127	1517	ENSRNOG00000000521;ENSRNOG00000000527;ENSRNOG00000000827;ENSRNOG00000002618;ENSRNOG00000002946;ENSRNOG00000003147;ENSRNOG00000003232;ENSRNOG00000003256;ENSRNOG00000003302;ENSRNOG00000003977;ENSRNOG00000004284;ENSRNOG00000004294;ENSRNOG00000004964;ENSRNOG00000005276;ENSRNOG00000005310;ENSRNOG00000005615;ENSRNOG00000005796;ENSRNOG00000005882;ENSRNOG00000006067;ENSRNOG00000006302;ENSRNOG00000006375;…	0.0192026
GO:0014074	response to purine-containing compound					25	160	ENSRNOG00000000165;ENSRNOG00000000604;ENSRNOG00000000967;ENSRNOG00000001148;ENSRNOG00000002115;ENSRNOG00000002693;ENSRNOG00000003977;ENSRNOG00000004649;ENSRNOG00000006997;ENSRNOG00000008015;ENSRNOG00000008414;ENSRNOG00000009568;ENSRNOG00000012840;ENSRNOG00000014525;ENSRNOG00000016552;ENSRNOG00000019587;ENSRNOG00000020420;ENSRNOG00000020723;ENSRNOG00000022372;ENSRNOG00000026293;ENSRNOG00000026319;…	0.0205959	20	160	ENSRNOG00000000158;ENSRNOG00000000165;ENSRNOG00000000604;ENSRNOG00000000967;ENSRNOG00000003977;ENSRNOG00000008837;ENSRNOG00000009568;ENSRNOG00000012123;ENSRNOG00000013704;ENSRNOG00000014525;ENSRNOG00000016552;ENSRNOG00000019587;ENSRNOG00000020420;ENSRNOG00000020723;ENSRNOG00000026963;ENSRNOG00000028616;ENSRNOG00000031896;ENSRNOG00000056457;ENSRNOG00000058646;ENSRNOG00000061883	0.0426792
GO:0014823	response to activity					18	86	ENSRNOG00000001420;ENSRNOG00000006302;ENSRNOG00000006622;ENSRNOG00000008364;ENSRNOG00000009615;ENSRNOG00000013271;ENSRNOG00000014338;ENSRNOG00000014525;ENSRNOG00000015206;ENSRNOG00000019113;ENSRNOG00000020660;ENSRNOG00000020723;ENSRNOG00000020990;ENSRNOG00000028616;ENSRNOG00000032134;ENSRNOG00000046763;ENSRNOG00000047986;ENSRNOG00000057464	0.00392848	13	86	ENSRNOG00000004640;ENSRNOG00000006302;ENSRNOG00000006622;ENSRNOG00000008364;ENSRNOG00000009615;ENSRNOG00000013409;ENSRNOG00000014525;ENSRNOG00000015206;ENSRNOG00000019113;ENSRNOG00000020723;ENSRNOG00000028616;ENSRNOG00000032134;ENSRNOG00000046763	0.0420618
GO:0015031	protein transport					173	1438	ENSRNOG00000000053;ENSRNOG00000000150;ENSRNOG00000000164;ENSRNOG00000000314;ENSRNOG00000000322;ENSRNOG00000000520;ENSRNOG00000000521;ENSRNOG00000000557;ENSRNOG00000000796;ENSRNOG00000000841;ENSRNOG00000000853;ENSRNOG00000000967;ENSRNOG00000001083;ENSRNOG00000001173;ENSRNOG00000001415;ENSRNOG00000001420;ENSRNOG00000001436;ENSRNOG00000001709;ENSRNOG00000002039;ENSRNOG00000002144;ENSRNOG00000002225;…	6.83486e-06	139	1438	ENSRNOG00000000053;ENSRNOG00000000096;ENSRNOG00000000150;ENSRNOG00000000164;ENSRNOG00000000470;ENSRNOG00000000520;ENSRNOG00000000521;ENSRNOG00000000796;ENSRNOG00000000967;ENSRNOG00000001083;ENSRNOG00000001173;ENSRNOG00000001258;ENSRNOG00000001415;ENSRNOG00000001436;ENSRNOG00000002039;ENSRNOG00000002251;ENSRNOG00000002615;ENSRNOG00000002636;ENSRNOG00000002735;ENSRNOG00000002878;ENSRNOG00000003747;…	3.30502e-05
GO:0015718	monocarboxylic acid transport					20	128	ENSRNOG00000002393;ENSRNOG00000002636;ENSRNOG00000003232;ENSRNOG00000004649;ENSRNOG00000006675;ENSRNOG00000006779;ENSRNOG00000008012;ENSRNOG00000010128;ENSRNOG00000012879;ENSRNOG00000018748;ENSRNOG00000018920;ENSRNOG00000019180;ENSRNOG00000019996;ENSRNOG00000020578;ENSRNOG00000030538;ENSRNOG00000036984;ENSRNOG00000046727;ENSRNOG00000050860;ENSRNOG00000057470;ENSRNOG00000061883	0.0481085	25	128	ENSRNOG00000002393;ENSRNOG00000002636;ENSRNOG00000003232;ENSRNOG00000005794;ENSRNOG00000006779;ENSRNOG00000007060;ENSRNOG00000008012;ENSRNOG00000009005;ENSRNOG00000010128;ENSRNOG00000010633;ENSRNOG00000016827;ENSRNOG00000017976;ENSRNOG00000018677;ENSRNOG00000018748;ENSRNOG00000018920;ENSRNOG00000019180;ENSRNOG00000019626;ENSRNOG00000020578;ENSRNOG00000021916;ENSRNOG00000028629;ENSRNOG00000030538;…	2.76063e-05
GO:0015721	bile acid and bile salt transport					6	17	ENSRNOG00000020578;ENSRNOG00000030538;ENSRNOG00000036984;ENSRNOG00000046727;ENSRNOG00000050860;ENSRNOG00000061883	0.0248089	7	17	ENSRNOG00000005794;ENSRNOG00000017976;ENSRNOG00000020578;ENSRNOG00000030538;ENSRNOG00000046727;ENSRNOG00000050860;ENSRNOG00000061883	0.00142839
GO:0015833	peptide transport					176	1479	ENSRNOG00000000053;ENSRNOG00000000150;ENSRNOG00000000164;ENSRNOG00000000314;ENSRNOG00000000322;ENSRNOG00000000520;ENSRNOG00000000521;ENSRNOG00000000557;ENSRNOG00000000796;ENSRNOG00000000841;ENSRNOG00000000853;ENSRNOG00000000967;ENSRNOG00000001083;ENSRNOG00000001173;ENSRNOG00000001415;ENSRNOG00000001420;ENSRNOG00000001436;ENSRNOG00000001709;ENSRNOG00000002039;ENSRNOG00000002144;ENSRNOG00000002225;…	1.04377e-05	142	1479	ENSRNOG00000000053;ENSRNOG00000000096;ENSRNOG00000000150;ENSRNOG00000000164;ENSRNOG00000000470;ENSRNOG00000000520;ENSRNOG00000000521;ENSRNOG00000000796;ENSRNOG00000000967;ENSRNOG00000001083;ENSRNOG00000001173;ENSRNOG00000001258;ENSRNOG00000001415;ENSRNOG00000001436;ENSRNOG00000002039;ENSRNOG00000002251;ENSRNOG00000002615;ENSRNOG00000002636;ENSRNOG00000002735;ENSRNOG00000002878;ENSRNOG00000003232;…	3.55966e-05
GO:0016032	viral process					31	213	ENSRNOG00000000322;ENSRNOG00000001926;ENSRNOG00000001963;ENSRNOG00000002735;ENSRNOG00000003975;ENSRNOG00000004273;ENSRNOG00000005331;ENSRNOG00000006985;ENSRNOG00000008672;ENSRNOG00000009884;ENSRNOG00000010362;ENSRNOG00000011414;ENSRNOG00000011540;ENSRNOG00000012748;ENSRNOG00000013948;ENSRNOG00000014434;ENSRNOG00000014762;ENSRNOG00000015144;ENSRNOG00000018186;ENSRNOG00000018730;ENSRNOG00000019490;…	0.0199582	29	213	ENSRNOG00000001106;ENSRNOG00000001926;ENSRNOG00000001963;ENSRNOG00000002341;ENSRNOG00000002735;ENSRNOG00000005331;ENSRNOG00000005766;ENSRNOG00000006985;ENSRNOG00000007781;ENSRNOG00000008672;ENSRNOG00000009446;ENSRNOG00000011414;ENSRNOG00000011540;ENSRNOG00000014762;ENSRNOG00000015078;ENSRNOG00000018186;ENSRNOG00000018233;ENSRNOG00000018730;ENSRNOG00000018985;ENSRNOG00000019490;ENSRNOG00000019834;…	0.00276148
GO:0016042	lipid catabolic process					57	266	ENSRNOG00000000571;ENSRNOG00000000658;ENSRNOG00000000815;ENSRNOG00000001177;ENSRNOG00000001385;ENSRNOG00000002755;ENSRNOG00000003500;ENSRNOG00000004377;ENSRNOG00000004649;ENSRNOG00000005542;ENSRNOG00000005618;ENSRNOG00000006675;ENSRNOG00000006779;ENSRNOG00000008167;ENSRNOG00000008190;ENSRNOG00000008474;ENSRNOG00000008755;ENSRNOG00000009488;ENSRNOG00000009615;ENSRNOG00000009845;ENSRNOG00000010034;…	1.55764e-09	42	266	ENSRNOG00000000658;ENSRNOG00000004089;ENSRNOG00000004377;ENSRNOG00000004601;ENSRNOG00000005542;ENSRNOG00000005861;ENSRNOG00000006779;ENSRNOG00000008167;ENSRNOG00000008190;ENSRNOG00000008474;ENSRNOG00000008755;ENSRNOG00000008933;ENSRNOG00000009488;ENSRNOG00000009615;ENSRNOG00000009845;ENSRNOG00000009946;ENSRNOG00000010128;ENSRNOG00000011622;ENSRNOG00000012247;ENSRNOG00000013004;ENSRNOG00000013704;…	4.27731e-06
GO:0016051	carbohydrate biosynthetic process					30	167	ENSRNOG00000000796;ENSRNOG00000001189;ENSRNOG00000002642;ENSRNOG00000003712;ENSRNOG00000003745;ENSRNOG00000004172;ENSRNOG00000006622;ENSRNOG00000009615;ENSRNOG00000009845;ENSRNOG00000010482;ENSRNOG00000011474;ENSRNOG00000014597;ENSRNOG00000015290;ENSRNOG00000016214;ENSRNOG00000016348;ENSRNOG00000016349;ENSRNOG00000016727;ENSRNOG00000017801;ENSRNOG00000018494;ENSRNOG00000019014;ENSRNOG00000020254;…	0.00103869	21	167	ENSRNOG00000000796;ENSRNOG00000002642;ENSRNOG00000006622;ENSRNOG00000009615;ENSRNOG00000009845;ENSRNOG00000015518;ENSRNOG00000016349;ENSRNOG00000016727;ENSRNOG00000018494;ENSRNOG00000018677;ENSRNOG00000019372;ENSRNOG00000020254;ENSRNOG00000023150;ENSRNOG00000024886;ENSRNOG00000028616;ENSRNOG00000028629;ENSRNOG00000051171;ENSRNOG00000056457;ENSRNOG00000056728;ENSRNOG00000058249;ENSRNOG00000059753	0.034389
GO:0016053	organic acid biosynthetic process					76	330	ENSRNOG00000000658;ENSRNOG00000001142;ENSRNOG00000002478;ENSRNOG00000002636;ENSRNOG00000002642;ENSRNOG00000002643;ENSRNOG00000002991;ENSRNOG00000003223;ENSRNOG00000003228;ENSRNOG00000003709;ENSRNOG00000004245;ENSRNOG00000004649;ENSRNOG00000005795;ENSRNOG00000006331;ENSRNOG00000006508;ENSRNOG00000006589;ENSRNOG00000006807;ENSRNOG00000007395;ENSRNOG00000008245;ENSRNOG00000008377;ENSRNOG00000008553;…	1.93183e-14	63	330	ENSRNOG00000000158;ENSRNOG00000000658;ENSRNOG00000000903;ENSRNOG00000001142;ENSRNOG00000002478;ENSRNOG00000002636;ENSRNOG00000002642;ENSRNOG00000003228;ENSRNOG00000005275;ENSRNOG00000006589;ENSRNOG00000007395;ENSRNOG00000007763;ENSRNOG00000008245;ENSRNOG00000008377;ENSRNOG00000008837;ENSRNOG00000009488;ENSRNOG00000009565;ENSRNOG00000009630;ENSRNOG00000010128;ENSRNOG00000010580;ENSRNOG00000011039;…	1.14804e-12
GO:0016071	mRNA metabolic process					87	531	ENSRNOG00000000520;ENSRNOG00000000841;ENSRNOG00000000989;ENSRNOG00000001783;ENSRNOG00000002735;ENSRNOG00000002818;ENSRNOG00000002828;ENSRNOG00000002871;ENSRNOG00000003497;ENSRNOG00000003689;ENSRNOG00000004287;ENSRNOG00000004726;ENSRNOG00000004827;ENSRNOG00000005257;ENSRNOG00000005513;ENSRNOG00000006652;ENSRNOG00000006655;ENSRNOG00000006997;ENSRNOG00000007134;ENSRNOG00000007315;ENSRNOG00000007532;…	3.09111e-08	59	531	ENSRNOG00000000422;ENSRNOG00000000520;ENSRNOG00000002292;ENSRNOG00000002735;ENSRNOG00000002818;ENSRNOG00000002871;ENSRNOG00000004287;ENSRNOG00000004726;ENSRNOG00000005257;ENSRNOG00000005513;ENSRNOG00000006355;ENSRNOG00000006380;ENSRNOG00000006420;ENSRNOG00000006652;ENSRNOG00000006655;ENSRNOG00000008639;ENSRNOG00000009245;ENSRNOG00000009615;ENSRNOG00000009639;ENSRNOG00000009960;ENSRNOG00000010799;…	0.000934344
GO:0016125	sterol metabolic process					22	96	ENSRNOG00000002115;ENSRNOG00000002478;ENSRNOG00000003500;ENSRNOG00000005542;ENSRNOG00000006859;ENSRNOG00000006997;ENSRNOG00000008364;ENSRNOG00000009488;ENSRNOG00000009550;ENSRNOG00000012911;ENSRNOG00000013004;ENSRNOG00000013376;ENSRNOG00000016552;ENSRNOG00000017188;ENSRNOG00000018114;ENSRNOG00000019573;ENSRNOG00000020696;ENSRNOG00000020776;ENSRNOG00000020853;ENSRNOG00000054549;ENSRNOG00000056728;…	0.000281378	28	96	ENSRNOG00000002478;ENSRNOG00000002826;ENSRNOG00000005542;ENSRNOG00000006787;ENSRNOG00000006859;ENSRNOG00000008074;ENSRNOG00000008364;ENSRNOG00000009488;ENSRNOG00000009550;ENSRNOG00000009946;ENSRNOG00000012123;ENSRNOG00000012911;ENSRNOG00000013004;ENSRNOG00000013376;ENSRNOG00000013763;ENSRNOG00000016122;ENSRNOG00000016552;ENSRNOG00000017188;ENSRNOG00000018114;ENSRNOG00000020696;ENSRNOG00000020853;…	8.35081e-10
GO:0016236	macroautophagy					27	171	ENSRNOG00000000164;ENSRNOG00000000322;ENSRNOG00000003147;ENSRNOG00000003649;ENSRNOG00000005528;ENSRNOG00000008604;ENSRNOG00000009252;ENSRNOG00000009615;ENSRNOG00000012247;ENSRNOG00000012748;ENSRNOG00000014117;ENSRNOG00000015385;ENSRNOG00000017417;ENSRNOG00000018698;ENSRNOG00000019282;ENSRNOG00000020298;ENSRNOG00000020730;ENSRNOG00000022392;ENSRNOG00000025443;ENSRNOG00000030391;ENSRNOG00000038883;…	0.0124677	22	171	ENSRNOG00000000164;ENSRNOG00000000438;ENSRNOG00000003147;ENSRNOG00000008891;ENSRNOG00000009252;ENSRNOG00000009615;ENSRNOG00000012247;ENSRNOG00000014117;ENSRNOG00000016984;ENSRNOG00000017941;ENSRNOG00000018698;ENSRNOG00000019282;ENSRNOG00000020298;ENSRNOG00000020730;ENSRNOG00000022392;ENSRNOG00000025443;ENSRNOG00000030391;ENSRNOG00000034242;ENSRNOG00000036662;ENSRNOG00000038883;ENSRNOG00000048509;…	0.0226462
GO:0016999	antibiotic metabolic process					27	123	ENSRNOG00000002115;ENSRNOG00000003163;ENSRNOG00000003763;ENSRNOG00000004332;ENSRNOG00000005686;ENSRNOG00000006460;ENSRNOG00000007895;ENSRNOG00000008364;ENSRNOG00000010452;ENSRNOG00000012436;ENSRNOG00000013271;ENSRNOG00000013331;ENSRNOG00000013911;ENSRNOG00000015385;ENSRNOG00000016727;ENSRNOG00000016924;ENSRNOG00000017672;ENSRNOG00000018289;ENSRNOG00000018740;ENSRNOG00000018755;ENSRNOG00000019742;…	7.90804e-05	20	123	ENSRNOG00000001823;ENSRNOG00000001967;ENSRNOG00000005849;ENSRNOG00000007895;ENSRNOG00000008103;ENSRNOG00000008364;ENSRNOG00000009994;ENSRNOG00000012436;ENSRNOG00000013911;ENSRNOG00000013949;ENSRNOG00000016727;ENSRNOG00000016924;ENSRNOG00000017481;ENSRNOG00000017672;ENSRNOG00000018740;ENSRNOG00000018755;ENSRNOG00000019742;ENSRNOG00000023587;ENSRNOG00000028616;ENSRNOG00000046727	0.00281289
GO:0017038	protein import					36	182	ENSRNOG00000000521;ENSRNOG00000000796;ENSRNOG00000001173;ENSRNOG00000004700;ENSRNOG00000006539;ENSRNOG00000006913;ENSRNOG00000007040;ENSRNOG00000007665;ENSRNOG00000009063;ENSRNOG00000010235;ENSRNOG00000010989;ENSRNOG00000011952;ENSRNOG00000012999;ENSRNOG00000013498;ENSRNOG00000014448;ENSRNOG00000014525;ENSRNOG00000016460;ENSRNOG00000016596;ENSRNOG00000018556;ENSRNOG00000018903;ENSRNOG00000019407;…	2.74659e-05	23	182	ENSRNOG00000000521;ENSRNOG00000000796;ENSRNOG00000001173;ENSRNOG00000004700;ENSRNOG00000006539;ENSRNOG00000007040;ENSRNOG00000007665;ENSRNOG00000008222;ENSRNOG00000009882;ENSRNOG00000010235;ENSRNOG00000012999;ENSRNOG00000014448;ENSRNOG00000014525;ENSRNOG00000015380;ENSRNOG00000016460;ENSRNOG00000019618;ENSRNOG00000019638;ENSRNOG00000019742;ENSRNOG00000020298;ENSRNOG00000025156;ENSRNOG00000028629;…	0.0227588
GO:0019216	regulation of lipid metabolic process					53	270	ENSRNOG00000000068;ENSRNOG00000000571;ENSRNOG00000000658;ENSRNOG00000001189;ENSRNOG00000002115;ENSRNOG00000002212;ENSRNOG00000002478;ENSRNOG00000003228;ENSRNOG00000003500;ENSRNOG00000003712;ENSRNOG00000004172;ENSRNOG00000004649;ENSRNOG00000005542;ENSRNOG00000005618;ENSRNOG00000006331;ENSRNOG00000006675;ENSRNOG00000007496;ENSRNOG00000008167;ENSRNOG00000008377;ENSRNOG00000009063;ENSRNOG00000009488;…	1.51097e-07	38	270	ENSRNOG00000000068;ENSRNOG00000000658;ENSRNOG00000002050;ENSRNOG00000002478;ENSRNOG00000003228;ENSRNOG00000005542;ENSRNOG00000007237;ENSRNOG00000007422;ENSRNOG00000007496;ENSRNOG00000007545;ENSRNOG00000008167;ENSRNOG00000008377;ENSRNOG00000009488;ENSRNOG00000009565;ENSRNOG00000009615;ENSRNOG00000009946;ENSRNOG00000012404;ENSRNOG00000012911;ENSRNOG00000013536;ENSRNOG00000013763;ENSRNOG00000014522;…	0.000189973
GO:0019217	regulation of fatty acid metabolic process					24	69	ENSRNOG00000000658;ENSRNOG00000002478;ENSRNOG00000003228;ENSRNOG00000004172;ENSRNOG00000004649;ENSRNOG00000006331;ENSRNOG00000006675;ENSRNOG00000008377;ENSRNOG00000009488;ENSRNOG00000009565;ENSRNOG00000009615;ENSRNOG00000012879;ENSRNOG00000012911;ENSRNOG00000014254;ENSRNOG00000014522;ENSRNOG00000014597;ENSRNOG00000018114;ENSRNOG00000018402;ENSRNOG00000020578;ENSRNOG00000020853;ENSRNOG00000034116;…	4.02777e-08	18	69	ENSRNOG00000000658;ENSRNOG00000002478;ENSRNOG00000003228;ENSRNOG00000008377;ENSRNOG00000009488;ENSRNOG00000009565;ENSRNOG00000009615;ENSRNOG00000012911;ENSRNOG00000013763;ENSRNOG00000014522;ENSRNOG00000018114;ENSRNOG00000018677;ENSRNOG00000020578;ENSRNOG00000020853;ENSRNOG00000028629;ENSRNOG00000034116;ENSRNOG00000046889;ENSRNOG00000047503	1.31159e-05
GO:0019222	regulation of metabolic process					525	5422	ENSRNOG00000000053;ENSRNOG00000000068;ENSRNOG00000000150;ENSRNOG00000000165;ENSRNOG00000000322;ENSRNOG00000000397;ENSRNOG00000000411;ENSRNOG00000000461;ENSRNOG00000000467;ENSRNOG00000000488;ENSRNOG00000000520;ENSRNOG00000000521;ENSRNOG00000000527;ENSRNOG00000000571;ENSRNOG00000000604;ENSRNOG00000000658;ENSRNOG00000000796;ENSRNOG00000000799;ENSRNOG00000000808;ENSRNOG00000000841;ENSRNOG00000000847;…	9.61215e-05	417	5422	ENSRNOG00000000053;ENSRNOG00000000068;ENSRNOG00000000150;ENSRNOG00000000165;ENSRNOG00000000397;ENSRNOG00000000422;ENSRNOG00000000438;ENSRNOG00000000461;ENSRNOG00000000520;ENSRNOG00000000521;ENSRNOG00000000527;ENSRNOG00000000604;ENSRNOG00000000610;ENSRNOG00000000658;ENSRNOG00000000796;ENSRNOG00000000799;ENSRNOG00000001030;ENSRNOG00000001050;ENSRNOG00000001142;ENSRNOG00000001269;ENSRNOG00000001314;…	0.000255185
GO:0019318	hexose metabolic process					45	195	ENSRNOG00000000165;ENSRNOG00000000658;ENSRNOG00000000796;ENSRNOG00000001189;ENSRNOG00000002185;ENSRNOG00000003712;ENSRNOG00000003745;ENSRNOG00000004172;ENSRNOG00000006622;ENSRNOG00000006807;ENSRNOG00000007895;ENSRNOG00000008047;ENSRNOG00000008377;ENSRNOG00000009565;ENSRNOG00000009615;ENSRNOG00000009845;ENSRNOG00000009889;ENSRNOG00000010196;ENSRNOG00000011474;ENSRNOG00000014254;ENSRNOG00000014522;…	1.45946e-08	35	195	ENSRNOG00000000165;ENSRNOG00000000658;ENSRNOG00000000796;ENSRNOG00000002615;ENSRNOG00000005358;ENSRNOG00000006622;ENSRNOG00000007895;ENSRNOG00000008047;ENSRNOG00000008095;ENSRNOG00000008377;ENSRNOG00000009565;ENSRNOG00000009615;ENSRNOG00000009845;ENSRNOG00000009889;ENSRNOG00000009994;ENSRNOG00000014522;ENSRNOG00000014565;ENSRNOG00000015439;ENSRNOG00000015518;ENSRNOG00000016349;ENSRNOG00000017523;…	2.23668e-06
GO:0019319	hexose biosynthetic process					19	64	ENSRNOG00000000796;ENSRNOG00000001189;ENSRNOG00000003712;ENSRNOG00000003745;ENSRNOG00000004172;ENSRNOG00000006622;ENSRNOG00000009845;ENSRNOG00000015290;ENSRNOG00000016348;ENSRNOG00000016349;ENSRNOG00000017801;ENSRNOG00000020254;ENSRNOG00000023150;ENSRNOG00000028616;ENSRNOG00000051171;ENSRNOG00000051592;ENSRNOG00000056457;ENSRNOG00000058249;ENSRNOG00000061527	2.32515e-05	12	64	ENSRNOG00000000796;ENSRNOG00000006622;ENSRNOG00000009845;ENSRNOG00000015518;ENSRNOG00000016349;ENSRNOG00000019372;ENSRNOG00000020254;ENSRNOG00000023150;ENSRNOG00000028616;ENSRNOG00000051171;ENSRNOG00000056457;ENSRNOG00000058249	0.0123412
GO:0019362	pyridine nucleotide metabolic process					27	148	ENSRNOG00000003709;ENSRNOG00000006589;ENSRNOG00000006807;ENSRNOG00000009715;ENSRNOG00000009982;ENSRNOG00000015290;ENSRNOG00000017895;ENSRNOG00000019201;ENSRNOG00000019458;ENSRNOG00000019742;ENSRNOG00000020420;ENSRNOG00000023150;ENSRNOG00000023587;ENSRNOG00000029993;ENSRNOG00000031263;ENSRNOG00000034191;ENSRNOG00000049497;ENSRNOG00000050315;ENSRNOG00000050585;ENSRNOG00000050630;ENSRNOG00000052802;…	0.0017006	21	148	ENSRNOG00000005861;ENSRNOG00000006589;ENSRNOG00000008103;ENSRNOG00000009715;ENSRNOG00000013949;ENSRNOG00000017523;ENSRNOG00000019458;ENSRNOG00000019742;ENSRNOG00000020420;ENSRNOG00000022576;ENSRNOG00000023150;ENSRNOG00000023587;ENSRNOG00000029993;ENSRNOG00000034242;ENSRNOG00000050585;ENSRNOG00000052802;ENSRNOG00000056076;ENSRNOG00000056457;ENSRNOG00000056728;ENSRNOG00000057626;ENSRNOG00000058249	0.0100455
GO:0019395	fatty acid oxidation					27	85	ENSRNOG00000000658;ENSRNOG00000001177;ENSRNOG00000006675;ENSRNOG00000006779;ENSRNOG00000008474;ENSRNOG00000008755;ENSRNOG00000009565;ENSRNOG00000009615;ENSRNOG00000009845;ENSRNOG00000010128;ENSRNOG00000011622;ENSRNOG00000011684;ENSRNOG00000012879;ENSRNOG00000014254;ENSRNOG00000014522;ENSRNOG00000014597;ENSRNOG00000017851;ENSRNOG00000018044;ENSRNOG00000018114;ENSRNOG00000018920;ENSRNOG00000019630;…	3.57178e-08	23	85	ENSRNOG00000000658;ENSRNOG00000004601;ENSRNOG00000006779;ENSRNOG00000008474;ENSRNOG00000008755;ENSRNOG00000009565;ENSRNOG00000009615;ENSRNOG00000009845;ENSRNOG00000010128;ENSRNOG00000011622;ENSRNOG00000014522;ENSRNOG00000018044;ENSRNOG00000018114;ENSRNOG00000018677;ENSRNOG00000018920;ENSRNOG00000019630;ENSRNOG00000020308;ENSRNOG00000024629;ENSRNOG00000028629;ENSRNOG00000029333;ENSRNOG00000029549;…	2.11914e-07
GO:0019439	aromatic compound catabolic process					63	429	ENSRNOG00000000815;ENSRNOG00000001889;ENSRNOG00000002186;ENSRNOG00000002735;ENSRNOG00000002828;ENSRNOG00000003253;ENSRNOG00000003515;ENSRNOG00000003709;ENSRNOG00000003773;ENSRNOG00000003863;ENSRNOG00000004726;ENSRNOG00000006589;ENSRNOG00000006807;ENSRNOG00000008639;ENSRNOG00000009094;ENSRNOG00000009615;ENSRNOG00000009977;ENSRNOG00000009982;ENSRNOG00000010580;ENSRNOG00000011785;ENSRNOG00000011910;…	0.000168427	56	429	ENSRNOG00000000422;ENSRNOG00000002186;ENSRNOG00000002292;ENSRNOG00000002701;ENSRNOG00000002735;ENSRNOG00000004726;ENSRNOG00000005266;ENSRNOG00000006067;ENSRNOG00000006420;ENSRNOG00000006589;ENSRNOG00000007081;ENSRNOG00000007570;ENSRNOG00000008639;ENSRNOG00000009094;ENSRNOG00000009245;ENSRNOG00000009615;ENSRNOG00000010262;ENSRNOG00000010537;ENSRNOG00000010580;ENSRNOG00000010799;ENSRNOG00000011612;…	1.92751e-05
GO:0019538	protein metabolic process					539	5425	ENSRNOG00000000053;ENSRNOG00000000068;ENSRNOG00000000150;ENSRNOG00000000164;ENSRNOG00000000322;ENSRNOG00000000411;ENSRNOG00000000467;ENSRNOG00000000521;ENSRNOG00000000527;ENSRNOG00000000571;ENSRNOG00000000604;ENSRNOG00000000796;ENSRNOG00000000799;ENSRNOG00000000800;ENSRNOG00000000841;ENSRNOG00000000847;ENSRNOG00000000853;ENSRNOG00000000867;ENSRNOG00000000900;ENSRNOG00000000909;ENSRNOG00000001139;…	2.28346e-06	418	5425	ENSRNOG00000000048;ENSRNOG00000000053;ENSRNOG00000000068;ENSRNOG00000000150;ENSRNOG00000000164;ENSRNOG00000000438;ENSRNOG00000000521;ENSRNOG00000000527;ENSRNOG00000000604;ENSRNOG00000000796;ENSRNOG00000000799;ENSRNOG00000000800;ENSRNOG00000001050;ENSRNOG00000001106;ENSRNOG00000001135;ENSRNOG00000001142;ENSRNOG00000001269;ENSRNOG00000001293;ENSRNOG00000001314;ENSRNOG00000001316;ENSRNOG00000001345;…	0.000210672
GO:0019626	short-chain fatty acid catabolic process					3	3	ENSRNOG00000015519;ENSRNOG00000018044;ENSRNOG00000028616	0.0095469	3	3	ENSRNOG00000015519;ENSRNOG00000018044;ENSRNOG00000028616	0.00577256
GO:0019682	glyceraldehyde-3-phosphate metabolic process					6	14	ENSRNOG00000015290;ENSRNOG00000016064;ENSRNOG00000019458;ENSRNOG00000050585;ENSRNOG00000056728;ENSRNOG00000057626	0.00914991	7	14	ENSRNOG00000005861;ENSRNOG00000016064;ENSRNOG00000017523;ENSRNOG00000019458;ENSRNOG00000050585;ENSRNOG00000056728;ENSRNOG00000057626	0.000372112
GO:0019941	modification-dependent protein catabolic process					62	530	ENSRNOG00000001598;ENSRNOG00000001602;ENSRNOG00000001719;ENSRNOG00000001829;ENSRNOG00000004006;ENSRNOG00000004107;ENSRNOG00000004130;ENSRNOG00000004637;ENSRNOG00000005310;ENSRNOG00000006302;ENSRNOG00000006328;ENSRNOG00000006663;ENSRNOG00000006751;ENSRNOG00000007114;ENSRNOG00000007916;ENSRNOG00000008214;ENSRNOG00000008604;ENSRNOG00000009887;ENSRNOG00000011951;ENSRNOG00000011987;ENSRNOG00000012001;…	0.0394132	54	530	ENSRNOG00000000438;ENSRNOG00000002341;ENSRNOG00000003261;ENSRNOG00000004100;ENSRNOG00000005310;ENSRNOG00000006302;ENSRNOG00000006345;ENSRNOG00000006663;ENSRNOG00000008214;ENSRNOG00000008551;ENSRNOG00000010727;ENSRNOG00000012026;ENSRNOG00000012862;ENSRNOG00000012911;ENSRNOG00000013763;ENSRNOG00000014097;ENSRNOG00000014448;ENSRNOG00000014986;ENSRNOG00000016456;ENSRNOG00000016460;ENSRNOG00000016509;…	0.0107124
GO:0030162	regulation of proteolysis					91	652	ENSRNOG00000000527;ENSRNOG00000000604;ENSRNOG00000001420;ENSRNOG00000001806;ENSRNOG00000001829;ENSRNOG00000002783;ENSRNOG00000004107;ENSRNOG00000004649;ENSRNOG00000005195;ENSRNOG00000005257;ENSRNOG00000005276;ENSRNOG00000006302;ENSRNOG00000006675;ENSRNOG00000006997;ENSRNOG00000007040;ENSRNOG00000007457;ENSRNOG00000007607;ENSRNOG00000007916;ENSRNOG00000008193;ENSRNOG00000009438;ENSRNOG00000009887;…	1.7345e-05	67	652	ENSRNOG00000000527;ENSRNOG00000000604;ENSRNOG00000002783;ENSRNOG00000004100;ENSRNOG00000005257;ENSRNOG00000005276;ENSRNOG00000006067;ENSRNOG00000006302;ENSRNOG00000006709;ENSRNOG00000006787;ENSRNOG00000007040;ENSRNOG00000007081;ENSRNOG00000007089;ENSRNOG00000007457;ENSRNOG00000007692;ENSRNOG00000008551;ENSRNOG00000011414;ENSRNOG00000012026;ENSRNOG00000013195;ENSRNOG00000014204;ENSRNOG00000014288;…	0.00264587
GO:0030163	protein catabolic process					106	807	ENSRNOG00000000164;ENSRNOG00000001598;ENSRNOG00000001602;ENSRNOG00000001719;ENSRNOG00000001829;ENSRNOG00000002358;ENSRNOG00000004006;ENSRNOG00000004107;ENSRNOG00000004130;ENSRNOG00000004332;ENSRNOG00000004464;ENSRNOG00000004637;ENSRNOG00000004649;ENSRNOG00000004725;ENSRNOG00000005195;ENSRNOG00000005257;ENSRNOG00000005276;ENSRNOG00000005310;ENSRNOG00000005542;ENSRNOG00000006143;ENSRNOG00000006302;…	3.61151e-05	90	807	ENSRNOG00000000164;ENSRNOG00000000438;ENSRNOG00000001293;ENSRNOG00000002341;ENSRNOG00000002358;ENSRNOG00000003261;ENSRNOG00000004100;ENSRNOG00000004464;ENSRNOG00000004725;ENSRNOG00000005257;ENSRNOG00000005276;ENSRNOG00000005310;ENSRNOG00000005333;ENSRNOG00000005542;ENSRNOG00000006302;ENSRNOG00000006326;ENSRNOG00000006345;ENSRNOG00000006663;ENSRNOG00000007089;ENSRNOG00000008214;ENSRNOG00000008320;…	1.2086e-05
GO:0030258	lipid modification					34	206	ENSRNOG00000000177;ENSRNOG00000000658;ENSRNOG00000001177;ENSRNOG00000003500;ENSRNOG00000006675;ENSRNOG00000006779;ENSRNOG00000007496;ENSRNOG00000008474;ENSRNOG00000008755;ENSRNOG00000009565;ENSRNOG00000009615;ENSRNOG00000009845;ENSRNOG00000010128;ENSRNOG00000010482;ENSRNOG00000011622;ENSRNOG00000011684;ENSRNOG00000012879;ENSRNOG00000013552;ENSRNOG00000014254;ENSRNOG00000014522;ENSRNOG00000014597;…	0.00174258	29	206	ENSRNOG00000000658;ENSRNOG00000004601;ENSRNOG00000006779;ENSRNOG00000007496;ENSRNOG00000008474;ENSRNOG00000008755;ENSRNOG00000009565;ENSRNOG00000009615;ENSRNOG00000009845;ENSRNOG00000010128;ENSRNOG00000011622;ENSRNOG00000013552;ENSRNOG00000014522;ENSRNOG00000014879;ENSRNOG00000018044;ENSRNOG00000018114;ENSRNOG00000018677;ENSRNOG00000018920;ENSRNOG00000019630;ENSRNOG00000020016;ENSRNOG00000020308;…	0.00169231
GO:0031099	regeneration					40	220	ENSRNOG00000000165;ENSRNOG00000000521;ENSRNOG00000000847;ENSRNOG00000001926;ENSRNOG00000002278;ENSRNOG00000003500;ENSRNOG00000004332;ENSRNOG00000004377;ENSRNOG00000005276;ENSRNOG00000005513;ENSRNOG00000005796;ENSRNOG00000006589;ENSRNOG00000007229;ENSRNOG00000007390;ENSRNOG00000007395;ENSRNOG00000010189;ENSRNOG00000010746;ENSRNOG00000012436;ENSRNOG00000012473;ENSRNOG00000014117;ENSRNOG00000016119;…	6.16275e-05	31	220	ENSRNOG00000000165;ENSRNOG00000000521;ENSRNOG00000001926;ENSRNOG00000002278;ENSRNOG00000004377;ENSRNOG00000004741;ENSRNOG00000005276;ENSRNOG00000005513;ENSRNOG00000005796;ENSRNOG00000006589;ENSRNOG00000007229;ENSRNOG00000007395;ENSRNOG00000010746;ENSRNOG00000012436;ENSRNOG00000014117;ENSRNOG00000016437;ENSRNOG00000016967;ENSRNOG00000017223;ENSRNOG00000018233;ENSRNOG00000018237;ENSRNOG00000018740;…	0.00100783
GO:0031100	animal organ regeneration					23	106	ENSRNOG00000000165;ENSRNOG00000000521;ENSRNOG00000000847;ENSRNOG00000001926;ENSRNOG00000003500;ENSRNOG00000004332;ENSRNOG00000004377;ENSRNOG00000005276;ENSRNOG00000005513;ENSRNOG00000007229;ENSRNOG00000007390;ENSRNOG00000007395;ENSRNOG00000010189;ENSRNOG00000010746;ENSRNOG00000012436;ENSRNOG00000014117;ENSRNOG00000016967;ENSRNOG00000018740;ENSRNOG00000023593;ENSRNOG00000024603;ENSRNOG00000025602;…	0.000416054	20	106	ENSRNOG00000000165;ENSRNOG00000000521;ENSRNOG00000001926;ENSRNOG00000004377;ENSRNOG00000004741;ENSRNOG00000005276;ENSRNOG00000005513;ENSRNOG00000007229;ENSRNOG00000007395;ENSRNOG00000010746;ENSRNOG00000012436;ENSRNOG00000014117;ENSRNOG00000016967;ENSRNOG00000018233;ENSRNOG00000018237;ENSRNOG00000018740;ENSRNOG00000020918;ENSRNOG00000024603;ENSRNOG00000025602;ENSRNOG00000032825	0.000442852
GO:0031323	regulation of cellular metabolic process					479	5062	ENSRNOG00000000053;ENSRNOG00000000068;ENSRNOG00000000150;ENSRNOG00000000165;ENSRNOG00000000322;ENSRNOG00000000397;ENSRNOG00000000461;ENSRNOG00000000467;ENSRNOG00000000488;ENSRNOG00000000520;ENSRNOG00000000521;ENSRNOG00000000527;ENSRNOG00000000571;ENSRNOG00000000604;ENSRNOG00000000658;ENSRNOG00000000796;ENSRNOG00000000799;ENSRNOG00000000808;ENSRNOG00000000841;ENSRNOG00000000847;ENSRNOG00000000853;…	0.00259242	383	5062	ENSRNOG00000000053;ENSRNOG00000000068;ENSRNOG00000000150;ENSRNOG00000000165;ENSRNOG00000000397;ENSRNOG00000000422;ENSRNOG00000000438;ENSRNOG00000000461;ENSRNOG00000000520;ENSRNOG00000000521;ENSRNOG00000000527;ENSRNOG00000000604;ENSRNOG00000000610;ENSRNOG00000000658;ENSRNOG00000000796;ENSRNOG00000000799;ENSRNOG00000001030;ENSRNOG00000001050;ENSRNOG00000001314;ENSRNOG00000001647;ENSRNOG00000001738;…	0.0025132
GO:0031324	negative regulation of cellular metabolic process					224	2154	ENSRNOG00000000053;ENSRNOG00000000068;ENSRNOG00000000322;ENSRNOG00000000397;ENSRNOG00000000467;ENSRNOG00000000488;ENSRNOG00000000521;ENSRNOG00000000604;ENSRNOG00000000658;ENSRNOG00000001139;ENSRNOG00000001189;ENSRNOG00000001524;ENSRNOG00000001582;ENSRNOG00000001585;ENSRNOG00000001806;ENSRNOG00000001889;ENSRNOG00000002389;ENSRNOG00000002393;ENSRNOG00000002478;ENSRNOG00000002618;ENSRNOG00000002735;…	0.00210631	177	2154	ENSRNOG00000000053;ENSRNOG00000000068;ENSRNOG00000000397;ENSRNOG00000000438;ENSRNOG00000000521;ENSRNOG00000000604;ENSRNOG00000000658;ENSRNOG00000001050;ENSRNOG00000001647;ENSRNOG00000001738;ENSRNOG00000002292;ENSRNOG00000002389;ENSRNOG00000002393;ENSRNOG00000002478;ENSRNOG00000002618;ENSRNOG00000002735;ENSRNOG00000002783;ENSRNOG00000002946;ENSRNOG00000003147;ENSRNOG00000003232;ENSRNOG00000003302;…	0.00689246
GO:0031325	positive regulation of cellular metabolic process					272	2790	ENSRNOG00000000053;ENSRNOG00000000068;ENSRNOG00000000165;ENSRNOG00000000397;ENSRNOG00000000488;ENSRNOG00000000521;ENSRNOG00000000527;ENSRNOG00000000571;ENSRNOG00000000604;ENSRNOG00000000796;ENSRNOG00000000799;ENSRNOG00000000808;ENSRNOG00000000841;ENSRNOG00000000847;ENSRNOG00000000853;ENSRNOG00000000923;ENSRNOG00000000989;ENSRNOG00000001030;ENSRNOG00000001172;ENSRNOG00000001420;ENSRNOG00000001582;…	0.0162366	231	2790	ENSRNOG00000000053;ENSRNOG00000000068;ENSRNOG00000000165;ENSRNOG00000000397;ENSRNOG00000000422;ENSRNOG00000000521;ENSRNOG00000000527;ENSRNOG00000000604;ENSRNOG00000000796;ENSRNOG00000000799;ENSRNOG00000001030;ENSRNOG00000001647;ENSRNOG00000001738;ENSRNOG00000002278;ENSRNOG00000002292;ENSRNOG00000002389;ENSRNOG00000002456;ENSRNOG00000002478;ENSRNOG00000002520;ENSRNOG00000002572;ENSRNOG00000002636;…	0.000668792
GO:0031329	regulation of cellular catabolic process					92	605	ENSRNOG00000000658;ENSRNOG00000001829;ENSRNOG00000002225;ENSRNOG00000002735;ENSRNOG00000002828;ENSRNOG00000003649;ENSRNOG00000004107;ENSRNOG00000004637;ENSRNOG00000004649;ENSRNOG00000004726;ENSRNOG00000005195;ENSRNOG00000005257;ENSRNOG00000005528;ENSRNOG00000006302;ENSRNOG00000006326;ENSRNOG00000006375;ENSRNOG00000006589;ENSRNOG00000006675;ENSRNOG00000007916;ENSRNOG00000007964;ENSRNOG00000008639;…	3.67604e-07	74	605	ENSRNOG00000000422;ENSRNOG00000000438;ENSRNOG00000000658;ENSRNOG00000001738;ENSRNOG00000002292;ENSRNOG00000002735;ENSRNOG00000003302;ENSRNOG00000004100;ENSRNOG00000004726;ENSRNOG00000005257;ENSRNOG00000005861;ENSRNOG00000006067;ENSRNOG00000006302;ENSRNOG00000006326;ENSRNOG00000006375;ENSRNOG00000006420;ENSRNOG00000006589;ENSRNOG00000007529;ENSRNOG00000008551;ENSRNOG00000008639;ENSRNOG00000008891;…	4.94995e-06
GO:0031330	negative regulation of cellular catabolic process					36	197	ENSRNOG00000000658;ENSRNOG00000002735;ENSRNOG00000002828;ENSRNOG00000003649;ENSRNOG00000004107;ENSRNOG00000004726;ENSRNOG00000005195;ENSRNOG00000006326;ENSRNOG00000007916;ENSRNOG00000008639;ENSRNOG00000009252;ENSRNOG00000009615;ENSRNOG00000009977;ENSRNOG00000010362;ENSRNOG00000012314;ENSRNOG00000014117;ENSRNOG00000015206;ENSRNOG00000015222;ENSRNOG00000015385;ENSRNOG00000015857;ENSRNOG00000016309;…	0.000162281	29	197	ENSRNOG00000000438;ENSRNOG00000000658;ENSRNOG00000001738;ENSRNOG00000002292;ENSRNOG00000002735;ENSRNOG00000004726;ENSRNOG00000006326;ENSRNOG00000006420;ENSRNOG00000007529;ENSRNOG00000008551;ENSRNOG00000008639;ENSRNOG00000009252;ENSRNOG00000009615;ENSRNOG00000010799;ENSRNOG00000012314;ENSRNOG00000014117;ENSRNOG00000015206;ENSRNOG00000015999;ENSRNOG00000016309;ENSRNOG00000016967;ENSRNOG00000018698;…	0.000830421
GO:0031331	positive regulation of cellular catabolic process					50	323	ENSRNOG00000001829;ENSRNOG00000002828;ENSRNOG00000004637;ENSRNOG00000004649;ENSRNOG00000005528;ENSRNOG00000006302;ENSRNOG00000006589;ENSRNOG00000006675;ENSRNOG00000007916;ENSRNOG00000007964;ENSRNOG00000008639;ENSRNOG00000009887;ENSRNOG00000011414;ENSRNOG00000011910;ENSRNOG00000011951;ENSRNOG00000012026;ENSRNOG00000012237;ENSRNOG00000013948;ENSRNOG00000014117;ENSRNOG00000014204;ENSRNOG00000014254;…	0.000336255	41	323	ENSRNOG00000000422;ENSRNOG00000002292;ENSRNOG00000003302;ENSRNOG00000004100;ENSRNOG00000006302;ENSRNOG00000006589;ENSRNOG00000008639;ENSRNOG00000009946;ENSRNOG00000011414;ENSRNOG00000011728;ENSRNOG00000011910;ENSRNOG00000012026;ENSRNOG00000014117;ENSRNOG00000014204;ENSRNOG00000016456;ENSRNOG00000016460;ENSRNOG00000016496;ENSRNOG00000017106;ENSRNOG00000017702;ENSRNOG00000017941;ENSRNOG00000018677;…	0.000820587
GO:0031400	negative regulation of protein modification process					60	496	ENSRNOG00000000322;ENSRNOG00000000521;ENSRNOG00000000604;ENSRNOG00000002618;ENSRNOG00000002755;ENSRNOG00000003048;ENSRNOG00000003232;ENSRNOG00000003745;ENSRNOG00000003977;ENSRNOG00000004107;ENSRNOG00000004637;ENSRNOG00000004649;ENSRNOG00000005428;ENSRNOG00000005615;ENSRNOG00000006302;ENSRNOG00000006338;ENSRNOG00000006399;ENSRNOG00000006622;ENSRNOG00000007029;ENSRNOG00000009568;ENSRNOG00000009615;…	0.0241445	48	496	ENSRNOG00000000521;ENSRNOG00000000604;ENSRNOG00000001738;ENSRNOG00000002618;ENSRNOG00000002946;ENSRNOG00000003232;ENSRNOG00000003302;ENSRNOG00000003977;ENSRNOG00000004100;ENSRNOG00000005615;ENSRNOG00000006302;ENSRNOG00000006622;ENSRNOG00000007029;ENSRNOG00000007081;ENSRNOG00000008551;ENSRNOG00000009568;ENSRNOG00000009615;ENSRNOG00000010235;ENSRNOG00000010389;ENSRNOG00000011503;ENSRNOG00000014294;…	0.0414361
GO:0031647	regulation of protein stability					42	224	ENSRNOG00000000164;ENSRNOG00000000236;ENSRNOG00000000923;ENSRNOG00000002878;ENSRNOG00000003500;ENSRNOG00000004107;ENSRNOG00000004637;ENSRNOG00000004793;ENSRNOG00000006663;ENSRNOG00000008597;ENSRNOG00000012594;ENSRNOG00000012999;ENSRNOG00000014064;ENSRNOG00000015385;ENSRNOG00000015630;ENSRNOG00000015703;ENSRNOG00000015857;ENSRNOG00000016460;ENSRNOG00000018289;ENSRNOG00000018903;ENSRNOG00000019090;…	1.63315e-05	27	224	ENSRNOG00000000164;ENSRNOG00000000438;ENSRNOG00000001293;ENSRNOG00000002878;ENSRNOG00000003261;ENSRNOG00000006663;ENSRNOG00000008551;ENSRNOG00000010951;ENSRNOG00000012594;ENSRNOG00000012999;ENSRNOG00000016460;ENSRNOG00000018413;ENSRNOG00000019090;ENSRNOG00000019122;ENSRNOG00000019423;ENSRNOG00000019618;ENSRNOG00000019638;ENSRNOG00000020298;ENSRNOG00000020723;ENSRNOG00000020950;ENSRNOG00000021317;…	0.0195151
GO:0031667	response to nutrient levels					84	512	ENSRNOG00000000164;ENSRNOG00000000165;ENSRNOG00000000322;ENSRNOG00000000521;ENSRNOG00000000658;ENSRNOG00000000967;ENSRNOG00000001189;ENSRNOG00000001420;ENSRNOG00000001524;ENSRNOG00000001889;ENSRNOG00000002115;ENSRNOG00000002783;ENSRNOG00000002911;ENSRNOG00000003745;ENSRNOG00000004172;ENSRNOG00000004332;ENSRNOG00000004649;ENSRNOG00000005195;ENSRNOG00000005614;ENSRNOG00000006302;ENSRNOG00000006305;…	5.39739e-08	72	512	ENSRNOG00000000164;ENSRNOG00000000165;ENSRNOG00000000521;ENSRNOG00000000658;ENSRNOG00000000967;ENSRNOG00000001050;ENSRNOG00000001738;ENSRNOG00000002341;ENSRNOG00000002783;ENSRNOG00000004294;ENSRNOG00000005861;ENSRNOG00000006067;ENSRNOG00000006302;ENSRNOG00000006305;ENSRNOG00000006589;ENSRNOG00000007139;ENSRNOG00000007235;ENSRNOG00000007990;ENSRNOG00000008012;ENSRNOG00000008364;ENSRNOG00000008837;…	3.19741e-08
GO:0031668	cellular response to extracellular stimulus					37	232	ENSRNOG00000000164;ENSRNOG00000000322;ENSRNOG00000000521;ENSRNOG00000000853;ENSRNOG00000001189;ENSRNOG00000001889;ENSRNOG00000002115;ENSRNOG00000002911;ENSRNOG00000003745;ENSRNOG00000004172;ENSRNOG00000005614;ENSRNOG00000006305;ENSRNOG00000007235;ENSRNOG00000008012;ENSRNOG00000008015;ENSRNOG00000009063;ENSRNOG00000009565;ENSRNOG00000009615;ENSRNOG00000010643;ENSRNOG00000013271;ENSRNOG00000014117;…	0.00180289	26	232	ENSRNOG00000000164;ENSRNOG00000000521;ENSRNOG00000001738;ENSRNOG00000006067;ENSRNOG00000006305;ENSRNOG00000007235;ENSRNOG00000008012;ENSRNOG00000009565;ENSRNOG00000009615;ENSRNOG00000010643;ENSRNOG00000014117;ENSRNOG00000016827;ENSRNOG00000016967;ENSRNOG00000018233;ENSRNOG00000018237;ENSRNOG00000018566;ENSRNOG00000019428;ENSRNOG00000020235;ENSRNOG00000020679;ENSRNOG00000025443;ENSRNOG00000026963;…	0.049636
GO:0031669	cellular response to nutrient levels					34	206	ENSRNOG00000000164;ENSRNOG00000000322;ENSRNOG00000000521;ENSRNOG00000001189;ENSRNOG00000001889;ENSRNOG00000002115;ENSRNOG00000002911;ENSRNOG00000003745;ENSRNOG00000004172;ENSRNOG00000005614;ENSRNOG00000006305;ENSRNOG00000007235;ENSRNOG00000008012;ENSRNOG00000009063;ENSRNOG00000009565;ENSRNOG00000009615;ENSRNOG00000010643;ENSRNOG00000013271;ENSRNOG00000014117;ENSRNOG00000014256;ENSRNOG00000014314;…	0.00174258	25	206	ENSRNOG00000000164;ENSRNOG00000000521;ENSRNOG00000001738;ENSRNOG00000006067;ENSRNOG00000006305;ENSRNOG00000007235;ENSRNOG00000008012;ENSRNOG00000009565;ENSRNOG00000009615;ENSRNOG00000010643;ENSRNOG00000014117;ENSRNOG00000016827;ENSRNOG00000016967;ENSRNOG00000018233;ENSRNOG00000018566;ENSRNOG00000019428;ENSRNOG00000020235;ENSRNOG00000020679;ENSRNOG00000025443;ENSRNOG00000026963;ENSRNOG00000028616;…	0.0251943
GO:0031998	regulation of fatty acid beta-oxidation					7	18	ENSRNOG00000000658;ENSRNOG00000006675;ENSRNOG00000009615;ENSRNOG00000014254;ENSRNOG00000014522;ENSRNOG00000014597;ENSRNOG00000046889	0.00672401	6	18	ENSRNOG00000000658;ENSRNOG00000009615;ENSRNOG00000014522;ENSRNOG00000018677;ENSRNOG00000028629;ENSRNOG00000046889	0.0119126
GO:0032268	regulation of cellular protein metabolic process					235	2198	ENSRNOG00000000068;ENSRNOG00000000150;ENSRNOG00000000322;ENSRNOG00000000521;ENSRNOG00000000527;ENSRNOG00000000571;ENSRNOG00000000604;ENSRNOG00000000799;ENSRNOG00000000841;ENSRNOG00000000847;ENSRNOG00000000853;ENSRNOG00000001420;ENSRNOG00000001598;ENSRNOG00000001602;ENSRNOG00000001806;ENSRNOG00000001829;ENSRNOG00000001979;ENSRNOG00000002115;ENSRNOG00000002125;ENSRNOG00000002278;ENSRNOG00000002393;…	0.000294129	196	2198	ENSRNOG00000000068;ENSRNOG00000000150;ENSRNOG00000000521;ENSRNOG00000000527;ENSRNOG00000000604;ENSRNOG00000000799;ENSRNOG00000001050;ENSRNOG00000001738;ENSRNOG00000001979;ENSRNOG00000002125;ENSRNOG00000002278;ENSRNOG00000002292;ENSRNOG00000002393;ENSRNOG00000002618;ENSRNOG00000002735;ENSRNOG00000002783;ENSRNOG00000002946;ENSRNOG00000003147;ENSRNOG00000003232;ENSRNOG00000003256;ENSRNOG00000003302;…	4.28581e-05
GO:0032269	negative regulation of cellular protein metabolic process					118	907	ENSRNOG00000000322;ENSRNOG00000000521;ENSRNOG00000000604;ENSRNOG00000001806;ENSRNOG00000002393;ENSRNOG00000002618;ENSRNOG00000002755;ENSRNOG00000002783;ENSRNOG00000002828;ENSRNOG00000003048;ENSRNOG00000003232;ENSRNOG00000003745;ENSRNOG00000003977;ENSRNOG00000004107;ENSRNOG00000004637;ENSRNOG00000004649;ENSRNOG00000005195;ENSRNOG00000005276;ENSRNOG00000005428;ENSRNOG00000005615;ENSRNOG00000006302;…	1.52991e-05	91	907	ENSRNOG00000000521;ENSRNOG00000000604;ENSRNOG00000001050;ENSRNOG00000001738;ENSRNOG00000002292;ENSRNOG00000002393;ENSRNOG00000002618;ENSRNOG00000002783;ENSRNOG00000002946;ENSRNOG00000003232;ENSRNOG00000003302;ENSRNOG00000003977;ENSRNOG00000004100;ENSRNOG00000005275;ENSRNOG00000005276;ENSRNOG00000005615;ENSRNOG00000006302;ENSRNOG00000006326;ENSRNOG00000006622;ENSRNOG00000006709;ENSRNOG00000006787;…	0.000547545
GO:0032355	response to estradiol					24	160	ENSRNOG00000000053;ENSRNOG00000001585;ENSRNOG00000003977;ENSRNOG00000004332;ENSRNOG00000004466;ENSRNOG00000005195;ENSRNOG00000005542;ENSRNOG00000006589;ENSRNOG00000006859;ENSRNOG00000007041;ENSRNOG00000007916;ENSRNOG00000008012;ENSRNOG00000008364;ENSRNOG00000009263;ENSRNOG00000012473;ENSRNOG00000012772;ENSRNOG00000016957;ENSRNOG00000018740;ENSRNOG00000019742;ENSRNOG00000020723;ENSRNOG00000020793;…	0.0381102	22	160	ENSRNOG00000000053;ENSRNOG00000002292;ENSRNOG00000003977;ENSRNOG00000004466;ENSRNOG00000005542;ENSRNOG00000005861;ENSRNOG00000006067;ENSRNOG00000006589;ENSRNOG00000006859;ENSRNOG00000008012;ENSRNOG00000008364;ENSRNOG00000008837;ENSRNOG00000012772;ENSRNOG00000016957;ENSRNOG00000018237;ENSRNOG00000018740;ENSRNOG00000019742;ENSRNOG00000020723;ENSRNOG00000020793;ENSRNOG00000020918;ENSRNOG00000023150;…	0.0112537
GO:0032388	positive regulation of intracellular transport					24	164	ENSRNOG00000001420;ENSRNOG00000002735;ENSRNOG00000005229;ENSRNOG00000005257;ENSRNOG00000010362;ENSRNOG00000010895;ENSRNOG00000010989;ENSRNOG00000012237;ENSRNOG00000012748;ENSRNOG00000013536;ENSRNOG00000018903;ENSRNOG00000019122;ENSRNOG00000019299;ENSRNOG00000019407;ENSRNOG00000019618;ENSRNOG00000020298;ENSRNOG00000032871;ENSRNOG00000033498;ENSRNOG00000038881;ENSRNOG00000043114;ENSRNOG00000043503;…	0.0483613	24	164	ENSRNOG00000000096;ENSRNOG00000002735;ENSRNOG00000004072;ENSRNOG00000005229;ENSRNOG00000005257;ENSRNOG00000005766;ENSRNOG00000006139;ENSRNOG00000006989;ENSRNOG00000010895;ENSRNOG00000013536;ENSRNOG00000015380;ENSRNOG00000018233;ENSRNOG00000018677;ENSRNOG00000019122;ENSRNOG00000019299;ENSRNOG00000019618;ENSRNOG00000020298;ENSRNOG00000031420;ENSRNOG00000033498;ENSRNOG00000043503;ENSRNOG00000055365;…	0.00332112
GO:0032434	regulation of proteasomal ubiquitin-dependent protein catabolic process					18	104	ENSRNOG00000001829;ENSRNOG00000006302;ENSRNOG00000009887;ENSRNOG00000011951;ENSRNOG00000016456;ENSRNOG00000016460;ENSRNOG00000018289;ENSRNOG00000018698;ENSRNOG00000018796;ENSRNOG00000019282;ENSRNOG00000019423;ENSRNOG00000019666;ENSRNOG00000019834;ENSRNOG00000025496;ENSRNOG00000026260;ENSRNOG00000032917;ENSRNOG00000045637;ENSRNOG00000050647	0.027693	15	104	ENSRNOG00000004100;ENSRNOG00000006302;ENSRNOG00000016456;ENSRNOG00000016460;ENSRNOG00000017106;ENSRNOG00000018698;ENSRNOG00000019282;ENSRNOG00000019423;ENSRNOG00000019506;ENSRNOG00000019834;ENSRNOG00000019891;ENSRNOG00000028629;ENSRNOG00000032917;ENSRNOG00000034242;ENSRNOG00000045637	0.0355569
GO:0032496	response to lipopolysaccharide					41	319	ENSRNOG00000000604;ENSRNOG00000001285;ENSRNOG00000001889;ENSRNOG00000001926;ENSRNOG00000002520;ENSRNOG00000002991;ENSRNOG00000003709;ENSRNOG00000004649;ENSRNOG00000004726;ENSRNOG00000005542;ENSRNOG00000006589;ENSRNOG00000007041;ENSRNOG00000007743;ENSRNOG00000008012;ENSRNOG00000008015;ENSRNOG00000008672;ENSRNOG00000009568;ENSRNOG00000012840;ENSRNOG00000013954;ENSRNOG00000014525;ENSRNOG00000014779;…	0.0376098	39	319	ENSRNOG00000000604;ENSRNOG00000001285;ENSRNOG00000001926;ENSRNOG00000002520;ENSRNOG00000004100;ENSRNOG00000004726;ENSRNOG00000005542;ENSRNOG00000006589;ENSRNOG00000008012;ENSRNOG00000008672;ENSRNOG00000008837;ENSRNOG00000009568;ENSRNOG00000010799;ENSRNOG00000011039;ENSRNOG00000013704;ENSRNOG00000013954;ENSRNOG00000014525;ENSRNOG00000014532;ENSRNOG00000015206;ENSRNOG00000017195;ENSRNOG00000017869;…	0.00237633
GO:0032868	response to insulin					48	246	ENSRNOG00000000165;ENSRNOG00000001007;ENSRNOG00000001436;ENSRNOG00000002393;ENSRNOG00000002478;ENSRNOG00000004172;ENSRNOG00000004377;ENSRNOG00000004649;ENSRNOG00000005513;ENSRNOG00000006302;ENSRNOG00000006589;ENSRNOG00000006622;ENSRNOG00000006859;ENSRNOG00000007041;ENSRNOG00000008047;ENSRNOG00000008364;ENSRNOG00000008377;ENSRNOG00000008652;ENSRNOG00000009565;ENSRNOG00000009615;ENSRNOG00000012473;…	8.67065e-07	43	246	ENSRNOG00000000165;ENSRNOG00000001007;ENSRNOG00000001436;ENSRNOG00000002393;ENSRNOG00000002478;ENSRNOG00000002946;ENSRNOG00000004072;ENSRNOG00000004377;ENSRNOG00000005513;ENSRNOG00000006302;ENSRNOG00000006380;ENSRNOG00000006589;ENSRNOG00000006622;ENSRNOG00000006859;ENSRNOG00000006989;ENSRNOG00000008047;ENSRNOG00000008364;ENSRNOG00000008377;ENSRNOG00000009565;ENSRNOG00000009615;ENSRNOG00000015654;…	1.73356e-07
GO:0032869	cellular response to insulin stimulus					32	186	ENSRNOG00000001007;ENSRNOG00000001436;ENSRNOG00000002393;ENSRNOG00000004172;ENSRNOG00000004377;ENSRNOG00000004649;ENSRNOG00000005513;ENSRNOG00000006302;ENSRNOG00000006859;ENSRNOG00000008377;ENSRNOG00000008652;ENSRNOG00000009565;ENSRNOG00000012473;ENSRNOG00000012582;ENSRNOG00000014597;ENSRNOG00000015654;ENSRNOG00000016023;ENSRNOG00000018903;ENSRNOG00000019113;ENSRNOG00000019272;ENSRNOG00000020420;…	0.00131533	28	186	ENSRNOG00000001007;ENSRNOG00000001436;ENSRNOG00000002393;ENSRNOG00000002946;ENSRNOG00000004072;ENSRNOG00000004377;ENSRNOG00000005513;ENSRNOG00000006302;ENSRNOG00000006859;ENSRNOG00000006989;ENSRNOG00000008377;ENSRNOG00000009565;ENSRNOG00000015654;ENSRNOG00000016023;ENSRNOG00000017702;ENSRNOG00000018237;ENSRNOG00000018677;ENSRNOG00000019113;ENSRNOG00000020185;ENSRNOG00000020420;ENSRNOG00000020578;…	0.000763428
GO:0032870	cellular response to hormone stimulus					85	596	ENSRNOG00000000847;ENSRNOG00000000853;ENSRNOG00000000967;ENSRNOG00000000989;ENSRNOG00000001007;ENSRNOG00000001436;ENSRNOG00000001585;ENSRNOG00000002393;ENSRNOG00000002642;ENSRNOG00000003515;ENSRNOG00000003977;ENSRNOG00000004172;ENSRNOG00000004332;ENSRNOG00000004377;ENSRNOG00000004466;ENSRNOG00000004537;ENSRNOG00000004649;ENSRNOG00000005257;ENSRNOG00000005513;ENSRNOG00000005542;ENSRNOG00000006302;…	1.69598e-05	72	596	ENSRNOG00000000967;ENSRNOG00000001007;ENSRNOG00000001436;ENSRNOG00000002050;ENSRNOG00000002292;ENSRNOG00000002393;ENSRNOG00000002642;ENSRNOG00000002946;ENSRNOG00000003977;ENSRNOG00000004072;ENSRNOG00000004377;ENSRNOG00000004466;ENSRNOG00000004537;ENSRNOG00000005257;ENSRNOG00000005513;ENSRNOG00000005542;ENSRNOG00000005861;ENSRNOG00000006067;ENSRNOG00000006302;ENSRNOG00000006622;ENSRNOG00000006859;…	1.06592e-05
GO:0032922	circadian regulation of gene expression					12	53	ENSRNOG00000001269;ENSRNOG00000001585;ENSRNOG00000006622;ENSRNOG00000006663;ENSRNOG00000006756;ENSRNOG00000007229;ENSRNOG00000009568;ENSRNOG00000010479;ENSRNOG00000014448;ENSRNOG00000017801;ENSRNOG00000020254;ENSRNOG00000051592	0.0159281	13	53	ENSRNOG00000001269;ENSRNOG00000006622;ENSRNOG00000006663;ENSRNOG00000006756;ENSRNOG00000007229;ENSRNOG00000007237;ENSRNOG00000009568;ENSRNOG00000010799;ENSRNOG00000014448;ENSRNOG00000018413;ENSRNOG00000019145;ENSRNOG00000019422;ENSRNOG00000020254	0.000751325
GO:0033036	macromolecule localization					272	2433	ENSRNOG00000000053;ENSRNOG00000000068;ENSRNOG00000000150;ENSRNOG00000000164;ENSRNOG00000000186;ENSRNOG00000000314;ENSRNOG00000000322;ENSRNOG00000000411;ENSRNOG00000000520;ENSRNOG00000000521;ENSRNOG00000000557;ENSRNOG00000000571;ENSRNOG00000000658;ENSRNOG00000000796;ENSRNOG00000000841;ENSRNOG00000000853;ENSRNOG00000000923;ENSRNOG00000000967;ENSRNOG00000001083;ENSRNOG00000001173;ENSRNOG00000001415;…	1.53734e-06	229	2433	ENSRNOG00000000048;ENSRNOG00000000053;ENSRNOG00000000068;ENSRNOG00000000096;ENSRNOG00000000150;ENSRNOG00000000164;ENSRNOG00000000186;ENSRNOG00000000470;ENSRNOG00000000520;ENSRNOG00000000521;ENSRNOG00000000658;ENSRNOG00000000665;ENSRNOG00000000796;ENSRNOG00000000967;ENSRNOG00000001083;ENSRNOG00000001173;ENSRNOG00000001258;ENSRNOG00000001293;ENSRNOG00000001415;ENSRNOG00000001436;ENSRNOG00000001706;…	7.36277e-08
GO:0033197	response to vitamin E					6	16	ENSRNOG00000006589;ENSRNOG00000008364;ENSRNOG00000015206;ENSRNOG00000016552;ENSRNOG00000049771;ENSRNOG00000056076	0.0181534	6	16	ENSRNOG00000006589;ENSRNOG00000008364;ENSRNOG00000015206;ENSRNOG00000016552;ENSRNOG00000020918;ENSRNOG00000056076	0.00675562
GO:0033273	response to vitamin					19	108	ENSRNOG00000004332;ENSRNOG00000006589;ENSRNOG00000007041;ENSRNOG00000008012;ENSRNOG00000008364;ENSRNOG00000008553;ENSRNOG00000010643;ENSRNOG00000012840;ENSRNOG00000013794;ENSRNOG00000013954;ENSRNOG00000015206;ENSRNOG00000016552;ENSRNOG00000020480;ENSRNOG00000029993;ENSRNOG00000047986;ENSRNOG00000049771;ENSRNOG00000054423;ENSRNOG00000056076;ENSRNOG00000057855	0.0185509	17	108	ENSRNOG00000002341;ENSRNOG00000004294;ENSRNOG00000006589;ENSRNOG00000008012;ENSRNOG00000008364;ENSRNOG00000010643;ENSRNOG00000013387;ENSRNOG00000013794;ENSRNOG00000013954;ENSRNOG00000015206;ENSRNOG00000016552;ENSRNOG00000018233;ENSRNOG00000018237;ENSRNOG00000020480;ENSRNOG00000020918;ENSRNOG00000029993;ENSRNOG00000056076	0.0100455
GO:0033365	protein localization to organelle					87	643	ENSRNOG00000000164;ENSRNOG00000000314;ENSRNOG00000000521;ENSRNOG00000000796;ENSRNOG00000000923;ENSRNOG00000001083;ENSRNOG00000001173;ENSRNOG00000001420;ENSRNOG00000001429;ENSRNOG00000002225;ENSRNOG00000002735;ENSRNOG00000003747;ENSRNOG00000004060;ENSRNOG00000004515;ENSRNOG00000004637;ENSRNOG00000004700;ENSRNOG00000005229;ENSRNOG00000006539;ENSRNOG00000006652;ENSRNOG00000006655;ENSRNOG00000006913;…	9.89993e-05	64	643	ENSRNOG00000000048;ENSRNOG00000000164;ENSRNOG00000000521;ENSRNOG00000000796;ENSRNOG00000001083;ENSRNOG00000001173;ENSRNOG00000001293;ENSRNOG00000001706;ENSRNOG00000002615;ENSRNOG00000002735;ENSRNOG00000003302;ENSRNOG00000003334;ENSRNOG00000003747;ENSRNOG00000004060;ENSRNOG00000004515;ENSRNOG00000004700;ENSRNOG00000005229;ENSRNOG00000005358;ENSRNOG00000006345;ENSRNOG00000006539;ENSRNOG00000006652;…	0.00727337
GO:0033500	carbohydrate homeostasis					34	224	ENSRNOG00000000967;ENSRNOG00000001420;ENSRNOG00000002609;ENSRNOG00000002671;ENSRNOG00000002693;ENSRNOG00000004172;ENSRNOG00000005257;ENSRNOG00000006302;ENSRNOG00000006388;ENSRNOG00000006622;ENSRNOG00000009488;ENSRNOG00000009565;ENSRNOG00000009884;ENSRNOG00000014256;ENSRNOG00000016723;ENSRNOG00000017808;ENSRNOG00000018289;ENSRNOG00000018903;ENSRNOG00000019113;ENSRNOG00000019302;ENSRNOG00000019587;…	0.00693037	29	224	ENSRNOG00000000967;ENSRNOG00000005257;ENSRNOG00000006302;ENSRNOG00000006388;ENSRNOG00000006622;ENSRNOG00000007990;ENSRNOG00000008578;ENSRNOG00000009488;ENSRNOG00000009565;ENSRNOG00000009882;ENSRNOG00000013409;ENSRNOG00000013507;ENSRNOG00000015518;ENSRNOG00000016122;ENSRNOG00000018233;ENSRNOG00000019113;ENSRNOG00000019587;ENSRNOG00000019742;ENSRNOG00000020679;ENSRNOG00000023150;ENSRNOG00000024212;…	0.00578531
GO:0033554	cellular response to stress					201	1558	ENSRNOG00000000053;ENSRNOG00000000164;ENSRNOG00000000322;ENSRNOG00000000488;ENSRNOG00000000521;ENSRNOG00000000571;ENSRNOG00000000604;ENSRNOG00000000798;ENSRNOG00000000808;ENSRNOG00000000827;ENSRNOG00000000841;ENSRNOG00000000853;ENSRNOG00000001189;ENSRNOG00000001285;ENSRNOG00000001582;ENSRNOG00000001598;ENSRNOG00000001829;ENSRNOG00000001889;ENSRNOG00000002115;ENSRNOG00000002389;ENSRNOG00000002478;…	3.08076e-09	159	1558	ENSRNOG00000000053;ENSRNOG00000000164;ENSRNOG00000000438;ENSRNOG00000000521;ENSRNOG00000000604;ENSRNOG00000000798;ENSRNOG00000000827;ENSRNOG00000001050;ENSRNOG00000001285;ENSRNOG00000001293;ENSRNOG00000002292;ENSRNOG00000002341;ENSRNOG00000002389;ENSRNOG00000002478;ENSRNOG00000002735;ENSRNOG00000003147;ENSRNOG00000003256;ENSRNOG00000003977;ENSRNOG00000004100;ENSRNOG00000004464;ENSRNOG00000004726;…	2.0625e-07
GO:0033559	unsaturated fatty acid metabolic process					18	79	ENSRNOG00000002642;ENSRNOG00000004649;ENSRNOG00000006331;ENSRNOG00000008245;ENSRNOG00000008755;ENSRNOG00000008988;ENSRNOG00000012458;ENSRNOG00000013552;ENSRNOG00000014508;ENSRNOG00000014702;ENSRNOG00000017672;ENSRNOG00000020385;ENSRNOG00000020480;ENSRNOG00000021924;ENSRNOG00000028891;ENSRNOG00000031004;ENSRNOG00000033164;ENSRNOG00000048949	0.00146948	17	79	ENSRNOG00000002642;ENSRNOG00000008245;ENSRNOG00000008755;ENSRNOG00000008988;ENSRNOG00000012458;ENSRNOG00000013552;ENSRNOG00000015072;ENSRNOG00000017672;ENSRNOG00000018237;ENSRNOG00000020385;ENSRNOG00000020480;ENSRNOG00000020817;ENSRNOG00000021924;ENSRNOG00000028891;ENSRNOG00000031312;ENSRNOG00000033164;ENSRNOG00000048949	0.000327404
GO:0033673	negative regulation of kinase activity					28	201	ENSRNOG00000000068;ENSRNOG00000000521;ENSRNOG00000003977;ENSRNOG00000004637;ENSRNOG00000004649;ENSRNOG00000005615;ENSRNOG00000006338;ENSRNOG00000007029;ENSRNOG00000010235;ENSRNOG00000010352;ENSRNOG00000014294;ENSRNOG00000014779;ENSRNOG00000016322;ENSRNOG00000018289;ENSRNOG00000019423;ENSRNOG00000020182;ENSRNOG00000020578;ENSRNOG00000020723;ENSRNOG00000023546;ENSRNOG00000026643;ENSRNOG00000027860;…	0.0490715	27	201	ENSRNOG00000000068;ENSRNOG00000000521;ENSRNOG00000003977;ENSRNOG00000004100;ENSRNOG00000005615;ENSRNOG00000007029;ENSRNOG00000010235;ENSRNOG00000011503;ENSRNOG00000014294;ENSRNOG00000016122;ENSRNOG00000016322;ENSRNOG00000018237;ENSRNOG00000019423;ENSRNOG00000020182;ENSRNOG00000020578;ENSRNOG00000020723;ENSRNOG00000023546;ENSRNOG00000026643;ENSRNOG00000027860;ENSRNOG00000028629;ENSRNOG00000031420;…	0.00532609
GO:0033865	nucleoside bisphosphate metabolic process					26	89	ENSRNOG00000000658;ENSRNOG00000004172;ENSRNOG00000005686;ENSRNOG00000006331;ENSRNOG00000006779;ENSRNOG00000006947;ENSRNOG00000007395;ENSRNOG00000007895;ENSRNOG00000008572;ENSRNOG00000008798;ENSRNOG00000009565;ENSRNOG00000010580;ENSRNOG00000011861;ENSRNOG00000013376;ENSRNOG00000014522;ENSRNOG00000016552;ENSRNOG00000016924;ENSRNOG00000018755;ENSRNOG00000019180;ENSRNOG00000020696;ENSRNOG00000029993;…	4.21829e-07	31	89	ENSRNOG00000000658;ENSRNOG00000001967;ENSRNOG00000006779;ENSRNOG00000006947;ENSRNOG00000007395;ENSRNOG00000007895;ENSRNOG00000008572;ENSRNOG00000008798;ENSRNOG00000009565;ENSRNOG00000009994;ENSRNOG00000010580;ENSRNOG00000010633;ENSRNOG00000011612;ENSRNOG00000013376;ENSRNOG00000014522;ENSRNOG00000016122;ENSRNOG00000016552;ENSRNOG00000016924;ENSRNOG00000017481;ENSRNOG00000017752;ENSRNOG00000018755;…	4.81876e-13
GO:0033866	nucleoside bisphosphate biosynthetic process					13	40	ENSRNOG00000000658;ENSRNOG00000004172;ENSRNOG00000006331;ENSRNOG00000006947;ENSRNOG00000007895;ENSRNOG00000008572;ENSRNOG00000009565;ENSRNOG00000010580;ENSRNOG00000014522;ENSRNOG00000016924;ENSRNOG00000018755;ENSRNOG00000019180;ENSRNOG00000048949	0.000348396	14	40	ENSRNOG00000000658;ENSRNOG00000006947;ENSRNOG00000007895;ENSRNOG00000008572;ENSRNOG00000009565;ENSRNOG00000009994;ENSRNOG00000010580;ENSRNOG00000010633;ENSRNOG00000014522;ENSRNOG00000016924;ENSRNOG00000018755;ENSRNOG00000019180;ENSRNOG00000019918;ENSRNOG00000048949	5.8727e-06
GO:0033875	ribonucleoside bisphosphate metabolic process					26	89	ENSRNOG00000000658;ENSRNOG00000004172;ENSRNOG00000005686;ENSRNOG00000006331;ENSRNOG00000006779;ENSRNOG00000006947;ENSRNOG00000007395;ENSRNOG00000007895;ENSRNOG00000008572;ENSRNOG00000008798;ENSRNOG00000009565;ENSRNOG00000010580;ENSRNOG00000011861;ENSRNOG00000013376;ENSRNOG00000014522;ENSRNOG00000016552;ENSRNOG00000016924;ENSRNOG00000018755;ENSRNOG00000019180;ENSRNOG00000020696;ENSRNOG00000029993;…	4.21829e-07	31	89	ENSRNOG00000000658;ENSRNOG00000001967;ENSRNOG00000006779;ENSRNOG00000006947;ENSRNOG00000007395;ENSRNOG00000007895;ENSRNOG00000008572;ENSRNOG00000008798;ENSRNOG00000009565;ENSRNOG00000009994;ENSRNOG00000010580;ENSRNOG00000010633;ENSRNOG00000011612;ENSRNOG00000013376;ENSRNOG00000014522;ENSRNOG00000016122;ENSRNOG00000016552;ENSRNOG00000016924;ENSRNOG00000017481;ENSRNOG00000017752;ENSRNOG00000018755;…	4.81876e-13
GO:0033993	response to lipid					122	924	ENSRNOG00000000053;ENSRNOG00000000165;ENSRNOG00000000521;ENSRNOG00000000604;ENSRNOG00000000847;ENSRNOG00000000853;ENSRNOG00000000967;ENSRNOG00000000989;ENSRNOG00000001148;ENSRNOG00000001285;ENSRNOG00000001420;ENSRNOG00000001585;ENSRNOG00000001889;ENSRNOG00000001926;ENSRNOG00000002478;ENSRNOG00000002520;ENSRNOG00000002642;ENSRNOG00000002671;ENSRNOG00000002693;ENSRNOG00000002991;ENSRNOG00000003500;…	4.79218e-06	102	924	ENSRNOG00000000053;ENSRNOG00000000158;ENSRNOG00000000165;ENSRNOG00000000521;ENSRNOG00000000604;ENSRNOG00000000967;ENSRNOG00000001285;ENSRNOG00000001926;ENSRNOG00000002050;ENSRNOG00000002292;ENSRNOG00000002341;ENSRNOG00000002478;ENSRNOG00000002520;ENSRNOG00000002642;ENSRNOG00000003977;ENSRNOG00000004060;ENSRNOG00000004100;ENSRNOG00000004294;ENSRNOG00000004466;ENSRNOG00000004537;ENSRNOG00000004726;…	3.79358e-06
GO:0034030	ribonucleoside bisphosphate biosynthetic process					13	40	ENSRNOG00000000658;ENSRNOG00000004172;ENSRNOG00000006331;ENSRNOG00000006947;ENSRNOG00000007895;ENSRNOG00000008572;ENSRNOG00000009565;ENSRNOG00000010580;ENSRNOG00000014522;ENSRNOG00000016924;ENSRNOG00000018755;ENSRNOG00000019180;ENSRNOG00000048949	0.000348396	14	40	ENSRNOG00000000658;ENSRNOG00000006947;ENSRNOG00000007895;ENSRNOG00000008572;ENSRNOG00000009565;ENSRNOG00000009994;ENSRNOG00000010580;ENSRNOG00000010633;ENSRNOG00000014522;ENSRNOG00000016924;ENSRNOG00000018755;ENSRNOG00000019180;ENSRNOG00000019918;ENSRNOG00000048949	5.8727e-06
GO:0034032	purine nucleoside bisphosphate metabolic process					26	89	ENSRNOG00000000658;ENSRNOG00000004172;ENSRNOG00000005686;ENSRNOG00000006331;ENSRNOG00000006779;ENSRNOG00000006947;ENSRNOG00000007395;ENSRNOG00000007895;ENSRNOG00000008572;ENSRNOG00000008798;ENSRNOG00000009565;ENSRNOG00000010580;ENSRNOG00000011861;ENSRNOG00000013376;ENSRNOG00000014522;ENSRNOG00000016552;ENSRNOG00000016924;ENSRNOG00000018755;ENSRNOG00000019180;ENSRNOG00000020696;ENSRNOG00000029993;…	4.21829e-07	31	89	ENSRNOG00000000658;ENSRNOG00000001967;ENSRNOG00000006779;ENSRNOG00000006947;ENSRNOG00000007395;ENSRNOG00000007895;ENSRNOG00000008572;ENSRNOG00000008798;ENSRNOG00000009565;ENSRNOG00000009994;ENSRNOG00000010580;ENSRNOG00000010633;ENSRNOG00000011612;ENSRNOG00000013376;ENSRNOG00000014522;ENSRNOG00000016122;ENSRNOG00000016552;ENSRNOG00000016924;ENSRNOG00000017481;ENSRNOG00000017752;ENSRNOG00000018755;…	4.81876e-13
GO:0034033	purine nucleoside bisphosphate biosynthetic process					13	40	ENSRNOG00000000658;ENSRNOG00000004172;ENSRNOG00000006331;ENSRNOG00000006947;ENSRNOG00000007895;ENSRNOG00000008572;ENSRNOG00000009565;ENSRNOG00000010580;ENSRNOG00000014522;ENSRNOG00000016924;ENSRNOG00000018755;ENSRNOG00000019180;ENSRNOG00000048949	0.000348396	14	40	ENSRNOG00000000658;ENSRNOG00000006947;ENSRNOG00000007895;ENSRNOG00000008572;ENSRNOG00000009565;ENSRNOG00000009994;ENSRNOG00000010580;ENSRNOG00000010633;ENSRNOG00000014522;ENSRNOG00000016924;ENSRNOG00000018755;ENSRNOG00000019180;ENSRNOG00000019918;ENSRNOG00000048949	5.8727e-06
GO:0034097	response to cytokine					83	756	ENSRNOG00000000053;ENSRNOG00000000847;ENSRNOG00000000853;ENSRNOG00000001926;ENSRNOG00000001963;ENSRNOG00000001964;ENSRNOG00000002393;ENSRNOG00000002572;ENSRNOG00000002735;ENSRNOG00000002755;ENSRNOG00000003709;ENSRNOG00000003977;ENSRNOG00000004273;ENSRNOG00000004649;ENSRNOG00000004726;ENSRNOG00000004959;ENSRNOG00000005528;ENSRNOG00000005542;ENSRNOG00000006302;ENSRNOG00000006997;ENSRNOG00000007390;…	0.0485046	80	756	ENSRNOG00000000053;ENSRNOG00000001926;ENSRNOG00000001963;ENSRNOG00000002341;ENSRNOG00000002393;ENSRNOG00000002572;ENSRNOG00000002735;ENSRNOG00000002946;ENSRNOG00000003977;ENSRNOG00000004072;ENSRNOG00000004726;ENSRNOG00000005275;ENSRNOG00000005358;ENSRNOG00000005542;ENSRNOG00000006302;ENSRNOG00000007628;ENSRNOG00000007990;ENSRNOG00000008837;ENSRNOG00000009568;ENSRNOG00000010633;ENSRNOG00000011039;…	0.000290889
GO:0034248	regulation of cellular amide metabolic process					45	295	ENSRNOG00000000150;ENSRNOG00000000799;ENSRNOG00000000841;ENSRNOG00000001598;ENSRNOG00000001602;ENSRNOG00000002393;ENSRNOG00000002735;ENSRNOG00000002828;ENSRNOG00000004172;ENSRNOG00000005418;ENSRNOG00000006990;ENSRNOG00000006997;ENSRNOG00000009152;ENSRNOG00000009565;ENSRNOG00000009615;ENSRNOG00000010218;ENSRNOG00000010352;ENSRNOG00000011910;ENSRNOG00000012582;ENSRNOG00000012954;ENSRNOG00000013271;…	0.00108822	36	295	ENSRNOG00000000150;ENSRNOG00000000799;ENSRNOG00000001050;ENSRNOG00000001738;ENSRNOG00000002292;ENSRNOG00000002393;ENSRNOG00000002735;ENSRNOG00000005275;ENSRNOG00000005849;ENSRNOG00000005861;ENSRNOG00000009152;ENSRNOG00000009446;ENSRNOG00000009565;ENSRNOG00000009615;ENSRNOG00000010218;ENSRNOG00000011728;ENSRNOG00000011910;ENSRNOG00000012954;ENSRNOG00000015999;ENSRNOG00000016460;ENSRNOG00000016580;…	0.00408952
GO:0034284	response to monosaccharide					30	197	ENSRNOG00000000967;ENSRNOG00000001420;ENSRNOG00000002671;ENSRNOG00000002693;ENSRNOG00000003500;ENSRNOG00000005257;ENSRNOG00000005614;ENSRNOG00000006302;ENSRNOG00000007229;ENSRNOG00000007916;ENSRNOG00000008047;ENSRNOG00000008364;ENSRNOG00000009488;ENSRNOG00000009884;ENSRNOG00000012840;ENSRNOG00000013536;ENSRNOG00000016723;ENSRNOG00000017693;ENSRNOG00000019113;ENSRNOG00000019302;ENSRNOG00000019587;…	0.0123261	30	197	ENSRNOG00000000967;ENSRNOG00000005257;ENSRNOG00000006302;ENSRNOG00000006989;ENSRNOG00000007229;ENSRNOG00000008047;ENSRNOG00000008364;ENSRNOG00000008578;ENSRNOG00000009488;ENSRNOG00000009882;ENSRNOG00000013409;ENSRNOG00000013507;ENSRNOG00000013536;ENSRNOG00000016122;ENSRNOG00000017693;ENSRNOG00000017702;ENSRNOG00000018233;ENSRNOG00000018237;ENSRNOG00000018566;ENSRNOG00000019113;ENSRNOG00000019422;…	0.000350555
GO:0034383	low-density lipoprotein particle clearance					7	20	ENSRNOG00000000053;ENSRNOG00000005542;ENSRNOG00000010362;ENSRNOG00000019113;ENSRNOG00000043503;ENSRNOG00000047503;ENSRNOG00000053306	0.0122305	6	20	ENSRNOG00000000053;ENSRNOG00000005542;ENSRNOG00000009946;ENSRNOG00000019113;ENSRNOG00000043503;ENSRNOG00000047503	0.0191943
GO:0034404	nucleobase-containing small molecule biosynthetic process					30	175	ENSRNOG00000000815;ENSRNOG00000001797;ENSRNOG00000002186;ENSRNOG00000002671;ENSRNOG00000002693;ENSRNOG00000002928;ENSRNOG00000006589;ENSRNOG00000006807;ENSRNOG00000009094;ENSRNOG00000010580;ENSRNOG00000012325;ENSRNOG00000013791;ENSRNOG00000014522;ENSRNOG00000015290;ENSRNOG00000017895;ENSRNOG00000018397;ENSRNOG00000019742;ENSRNOG00000020420;ENSRNOG00000021233;ENSRNOG00000023150;ENSRNOG00000023587;…	0.00217999	25	175	ENSRNOG00000001797;ENSRNOG00000002186;ENSRNOG00000006589;ENSRNOG00000007570;ENSRNOG00000009094;ENSRNOG00000010580;ENSRNOG00000012325;ENSRNOG00000013791;ENSRNOG00000014522;ENSRNOG00000016321;ENSRNOG00000018397;ENSRNOG00000019742;ENSRNOG00000020420;ENSRNOG00000021233;ENSRNOG00000022576;ENSRNOG00000023150;ENSRNOG00000023587;ENSRNOG00000034242;ENSRNOG00000050585;ENSRNOG00000051151;ENSRNOG00000052802;…	0.00357934
GO:0034440	lipid oxidation					27	87	ENSRNOG00000000658;ENSRNOG00000001177;ENSRNOG00000006675;ENSRNOG00000006779;ENSRNOG00000008474;ENSRNOG00000008755;ENSRNOG00000009565;ENSRNOG00000009615;ENSRNOG00000009845;ENSRNOG00000010128;ENSRNOG00000011622;ENSRNOG00000011684;ENSRNOG00000012879;ENSRNOG00000014254;ENSRNOG00000014522;ENSRNOG00000014597;ENSRNOG00000017851;ENSRNOG00000018044;ENSRNOG00000018114;ENSRNOG00000018920;ENSRNOG00000019630;…	5.86567e-08	23	87	ENSRNOG00000000658;ENSRNOG00000004601;ENSRNOG00000006779;ENSRNOG00000008474;ENSRNOG00000008755;ENSRNOG00000009565;ENSRNOG00000009615;ENSRNOG00000009845;ENSRNOG00000010128;ENSRNOG00000011622;ENSRNOG00000014522;ENSRNOG00000018044;ENSRNOG00000018114;ENSRNOG00000018677;ENSRNOG00000018920;ENSRNOG00000019630;ENSRNOG00000020308;ENSRNOG00000024629;ENSRNOG00000028629;ENSRNOG00000029333;ENSRNOG00000029549;…	3.31907e-07
GO:0034599	cellular response to oxidative stress					42	250	ENSRNOG00000000053;ENSRNOG00000000571;ENSRNOG00000000604;ENSRNOG00000000853;ENSRNOG00000001285;ENSRNOG00000002115;ENSRNOG00000002671;ENSRNOG00000003689;ENSRNOG00000004172;ENSRNOG00000004332;ENSRNOG00000004637;ENSRNOG00000005195;ENSRNOG00000005418;ENSRNOG00000006589;ENSRNOG00000006675;ENSRNOG00000007649;ENSRNOG00000007743;ENSRNOG00000007964;ENSRNOG00000008015;ENSRNOG00000009568;ENSRNOG00000010558;…	0.000238984	29	250	ENSRNOG00000000053;ENSRNOG00000000604;ENSRNOG00000001285;ENSRNOG00000002292;ENSRNOG00000006067;ENSRNOG00000006589;ENSRNOG00000007781;ENSRNOG00000009568;ENSRNOG00000010558;ENSRNOG00000011039;ENSRNOG00000012772;ENSRNOG00000014117;ENSRNOG00000014448;ENSRNOG00000014604;ENSRNOG00000016885;ENSRNOG00000016907;ENSRNOG00000017765;ENSRNOG00000018184;ENSRNOG00000019282;ENSRNOG00000021318;ENSRNOG00000022485;…	0.0234573
GO:0034605	cellular response to heat					14	67	ENSRNOG00000000521;ENSRNOG00000000604;ENSRNOG00000000808;ENSRNOG00000001285;ENSRNOG00000005257;ENSRNOG00000009920;ENSRNOG00000014117;ENSRNOG00000014485;ENSRNOG00000014525;ENSRNOG00000016133;ENSRNOG00000020298;ENSRNOG00000026643;ENSRNOG00000050647;ENSRNOG00000059714	0.0148374	11	67	ENSRNOG00000000521;ENSRNOG00000000604;ENSRNOG00000001285;ENSRNOG00000005257;ENSRNOG00000014117;ENSRNOG00000014525;ENSRNOG00000020298;ENSRNOG00000026643;ENSRNOG00000034093;ENSRNOG00000034242;ENSRNOG00000059714	0.0436825
GO:0034613	cellular protein localization					182	1459	ENSRNOG00000000068;ENSRNOG00000000164;ENSRNOG00000000314;ENSRNOG00000000520;ENSRNOG00000000521;ENSRNOG00000000557;ENSRNOG00000000796;ENSRNOG00000000841;ENSRNOG00000000923;ENSRNOG00000001083;ENSRNOG00000001173;ENSRNOG00000001415;ENSRNOG00000001420;ENSRNOG00000001429;ENSRNOG00000001436;ENSRNOG00000001709;ENSRNOG00000002039;ENSRNOG00000002144;ENSRNOG00000002225;ENSRNOG00000002251;ENSRNOG00000002301;…	2.99146e-07	151	1459	ENSRNOG00000000048;ENSRNOG00000000068;ENSRNOG00000000096;ENSRNOG00000000164;ENSRNOG00000000520;ENSRNOG00000000521;ENSRNOG00000000796;ENSRNOG00000001083;ENSRNOG00000001173;ENSRNOG00000001258;ENSRNOG00000001293;ENSRNOG00000001415;ENSRNOG00000001436;ENSRNOG00000001706;ENSRNOG00000001825;ENSRNOG00000002039;ENSRNOG00000002251;ENSRNOG00000002615;ENSRNOG00000002735;ENSRNOG00000003147;ENSRNOG00000003232;…	2.11595e-07
GO:0034614	cellular response to reactive oxygen species					26	146	ENSRNOG00000000053;ENSRNOG00000000571;ENSRNOG00000000604;ENSRNOG00000002115;ENSRNOG00000004172;ENSRNOG00000004332;ENSRNOG00000005195;ENSRNOG00000005418;ENSRNOG00000006589;ENSRNOG00000006675;ENSRNOG00000007649;ENSRNOG00000008015;ENSRNOG00000010558;ENSRNOG00000012081;ENSRNOG00000012473;ENSRNOG00000012772;ENSRNOG00000015385;ENSRNOG00000018289;ENSRNOG00000020660;ENSRNOG00000021125;ENSRNOG00000025443;…	0.00313169	19	146	ENSRNOG00000000053;ENSRNOG00000000604;ENSRNOG00000002292;ENSRNOG00000006067;ENSRNOG00000006589;ENSRNOG00000010558;ENSRNOG00000011039;ENSRNOG00000012772;ENSRNOG00000014604;ENSRNOG00000016885;ENSRNOG00000016907;ENSRNOG00000017765;ENSRNOG00000018184;ENSRNOG00000022485;ENSRNOG00000025443;ENSRNOG00000028629;ENSRNOG00000030715;ENSRNOG00000047816;ENSRNOG00000056076	0.0355569
GO:0034655	nucleobase-containing compound catabolic process					51	380	ENSRNOG00000000815;ENSRNOG00000002186;ENSRNOG00000002735;ENSRNOG00000002828;ENSRNOG00000003863;ENSRNOG00000004726;ENSRNOG00000006589;ENSRNOG00000006807;ENSRNOG00000008639;ENSRNOG00000009094;ENSRNOG00000009615;ENSRNOG00000009977;ENSRNOG00000009982;ENSRNOG00000010580;ENSRNOG00000011785;ENSRNOG00000011910;ENSRNOG00000012314;ENSRNOG00000013791;ENSRNOG00000013948;ENSRNOG00000014522;ENSRNOG00000015222;…	0.00674332	47	380	ENSRNOG00000000422;ENSRNOG00000002186;ENSRNOG00000002292;ENSRNOG00000002735;ENSRNOG00000004726;ENSRNOG00000006067;ENSRNOG00000006420;ENSRNOG00000006589;ENSRNOG00000007570;ENSRNOG00000008639;ENSRNOG00000009094;ENSRNOG00000009245;ENSRNOG00000009615;ENSRNOG00000010537;ENSRNOG00000010580;ENSRNOG00000010799;ENSRNOG00000011728;ENSRNOG00000011910;ENSRNOG00000012314;ENSRNOG00000013791;ENSRNOG00000014522;…	0.000475113
GO:0034976	response to endoplasmic reticulum stress					29	199	ENSRNOG00000003745;ENSRNOG00000004006;ENSRNOG00000004464;ENSRNOG00000005331;ENSRNOG00000010352;ENSRNOG00000010944;ENSRNOG00000012826;ENSRNOG00000012911;ENSRNOG00000014901;ENSRNOG00000016460;ENSRNOG00000017801;ENSRNOG00000018289;ENSRNOG00000018796;ENSRNOG00000018903;ENSRNOG00000019122;ENSRNOG00000019282;ENSRNOG00000019299;ENSRNOG00000019666;ENSRNOG00000019749;ENSRNOG00000020876;ENSRNOG00000020950;…	0.0261801	28	199	ENSRNOG00000000438;ENSRNOG00000001293;ENSRNOG00000002341;ENSRNOG00000004464;ENSRNOG00000005331;ENSRNOG00000006067;ENSRNOG00000006345;ENSRNOG00000010944;ENSRNOG00000012826;ENSRNOG00000012911;ENSRNOG00000013763;ENSRNOG00000014901;ENSRNOG00000014986;ENSRNOG00000016460;ENSRNOG00000019122;ENSRNOG00000019282;ENSRNOG00000019299;ENSRNOG00000019506;ENSRNOG00000019749;ENSRNOG00000019891;ENSRNOG00000020918;…	0.00216109
GO:0035383	thioester metabolic process					24	73	ENSRNOG00000000658;ENSRNOG00000004172;ENSRNOG00000005686;ENSRNOG00000006331;ENSRNOG00000006947;ENSRNOG00000007395;ENSRNOG00000007895;ENSRNOG00000008798;ENSRNOG00000009565;ENSRNOG00000010580;ENSRNOG00000011861;ENSRNOG00000013376;ENSRNOG00000014522;ENSRNOG00000016552;ENSRNOG00000016924;ENSRNOG00000018755;ENSRNOG00000019180;ENSRNOG00000020696;ENSRNOG00000029993;ENSRNOG00000031211;ENSRNOG00000034013;…	1.32145e-07	25	73	ENSRNOG00000000658;ENSRNOG00000006947;ENSRNOG00000007395;ENSRNOG00000007895;ENSRNOG00000008798;ENSRNOG00000009565;ENSRNOG00000009994;ENSRNOG00000010580;ENSRNOG00000010633;ENSRNOG00000011612;ENSRNOG00000013376;ENSRNOG00000014522;ENSRNOG00000016552;ENSRNOG00000016924;ENSRNOG00000017481;ENSRNOG00000018755;ENSRNOG00000019180;ENSRNOG00000020696;ENSRNOG00000029993;ENSRNOG00000031211;ENSRNOG00000034013;…	2.3571e-10
GO:0035384	thioester biosynthetic process					11	29	ENSRNOG00000000658;ENSRNOG00000004172;ENSRNOG00000006331;ENSRNOG00000006947;ENSRNOG00000007895;ENSRNOG00000009565;ENSRNOG00000014522;ENSRNOG00000016924;ENSRNOG00000018755;ENSRNOG00000019180;ENSRNOG00000048949	0.000318533	11	29	ENSRNOG00000000658;ENSRNOG00000006947;ENSRNOG00000007895;ENSRNOG00000009565;ENSRNOG00000009994;ENSRNOG00000010633;ENSRNOG00000014522;ENSRNOG00000016924;ENSRNOG00000018755;ENSRNOG00000019180;ENSRNOG00000048949	4.17946e-05
GO:0035459	cargo loading into vesicle					5	11	ENSRNOG00000002251;ENSRNOG00000004563;ENSRNOG00000008411;ENSRNOG00000014872;ENSRNOG00000018322	0.0173343	6	11	ENSRNOG00000002251;ENSRNOG00000004657;ENSRNOG00000005766;ENSRNOG00000008411;ENSRNOG00000014872;ENSRNOG00000018322	0.000789773
GO:0035690	cellular response to drug					53	350	ENSRNOG00000000053;ENSRNOG00000000571;ENSRNOG00000000604;ENSRNOG00000000853;ENSRNOG00000001148;ENSRNOG00000001797;ENSRNOG00000002115;ENSRNOG00000002693;ENSRNOG00000002818;ENSRNOG00000003253;ENSRNOG00000004332;ENSRNOG00000004649;ENSRNOG00000005195;ENSRNOG00000005418;ENSRNOG00000005796;ENSRNOG00000006302;ENSRNOG00000006589;ENSRNOG00000006675;ENSRNOG00000007041;ENSRNOG00000007235;ENSRNOG00000007649;…	0.000348396	43	350	ENSRNOG00000000053;ENSRNOG00000000604;ENSRNOG00000001797;ENSRNOG00000002292;ENSRNOG00000002818;ENSRNOG00000005796;ENSRNOG00000006067;ENSRNOG00000006302;ENSRNOG00000006589;ENSRNOG00000007235;ENSRNOG00000008012;ENSRNOG00000008672;ENSRNOG00000008837;ENSRNOG00000009882;ENSRNOG00000010558;ENSRNOG00000010746;ENSRNOG00000012123;ENSRNOG00000012772;ENSRNOG00000013409;ENSRNOG00000014117;ENSRNOG00000014604;…	0.00107879
GO:0035973	aggrephagy					5	8	ENSRNOG00000000322;ENSRNOG00000003147;ENSRNOG00000019282;ENSRNOG00000020298;ENSRNOG00000022392	0.00363988	4	8	ENSRNOG00000003147;ENSRNOG00000019282;ENSRNOG00000020298;ENSRNOG00000022392	0.0159132
GO:0036293	response to decreased oxygen levels					45	311	ENSRNOG00000000053;ENSRNOG00000001420;ENSRNOG00000001582;ENSRNOG00000002636;ENSRNOG00000005195;ENSRNOG00000005614;ENSRNOG00000006589;ENSRNOG00000006675;ENSRNOG00000008012;ENSRNOG00000008364;ENSRNOG00000008553;ENSRNOG00000009615;ENSRNOG00000010944;ENSRNOG00000012473;ENSRNOG00000012582;ENSRNOG00000012999;ENSRNOG00000013271;ENSRNOG00000013766;ENSRNOG00000014117;ENSRNOG00000014525;ENSRNOG00000015206;…	0.0032278	39	311	ENSRNOG00000000053;ENSRNOG00000002636;ENSRNOG00000006067;ENSRNOG00000006589;ENSRNOG00000007545;ENSRNOG00000007763;ENSRNOG00000008012;ENSRNOG00000008364;ENSRNOG00000009615;ENSRNOG00000010944;ENSRNOG00000012999;ENSRNOG00000013180;ENSRNOG00000013766;ENSRNOG00000014117;ENSRNOG00000014525;ENSRNOG00000015206;ENSRNOG00000016166;ENSRNOG00000017777;ENSRNOG00000019282;ENSRNOG00000019422;ENSRNOG00000019428;…	0.00150492
GO:0036294	cellular response to decreased oxygen levels					26	134	ENSRNOG00000001582;ENSRNOG00000006589;ENSRNOG00000006675;ENSRNOG00000009615;ENSRNOG00000010944;ENSRNOG00000012473;ENSRNOG00000012582;ENSRNOG00000012999;ENSRNOG00000013271;ENSRNOG00000013766;ENSRNOG00000014117;ENSRNOG00000015385;ENSRNOG00000017801;ENSRNOG00000017895;ENSRNOG00000019282;ENSRNOG00000019428;ENSRNOG00000019638;ENSRNOG00000019680;ENSRNOG00000019752;ENSRNOG00000020723;ENSRNOG00000023095;…	0.000884083	20	134	ENSRNOG00000006067;ENSRNOG00000006589;ENSRNOG00000009615;ENSRNOG00000010944;ENSRNOG00000012999;ENSRNOG00000013766;ENSRNOG00000014117;ENSRNOG00000019282;ENSRNOG00000019422;ENSRNOG00000019428;ENSRNOG00000019638;ENSRNOG00000020679;ENSRNOG00000020723;ENSRNOG00000021318;ENSRNOG00000028616;ENSRNOG00000028629;ENSRNOG00000036689;ENSRNOG00000049531;ENSRNOG00000056076;ENSRNOG00000058646	0.00745898
GO:0042133	neurotransmitter metabolic process					20	128	ENSRNOG00000000053;ENSRNOG00000000853;ENSRNOG00000001889;ENSRNOG00000001964;ENSRNOG00000002636;ENSRNOG00000004649;ENSRNOG00000007395;ENSRNOG00000007649;ENSRNOG00000009615;ENSRNOG00000011599;ENSRNOG00000012290;ENSRNOG00000016349;ENSRNOG00000016460;ENSRNOG00000016791;ENSRNOG00000017105;ENSRNOG00000017821;ENSRNOG00000023588;ENSRNOG00000038258;ENSRNOG00000046449;ENSRNOG00000059714	0.0481085	21	128	ENSRNOG00000000053;ENSRNOG00000002636;ENSRNOG00000005275;ENSRNOG00000007395;ENSRNOG00000008837;ENSRNOG00000009615;ENSRNOG00000010262;ENSRNOG00000011016;ENSRNOG00000011599;ENSRNOG00000013704;ENSRNOG00000016349;ENSRNOG00000016460;ENSRNOG00000016791;ENSRNOG00000017105;ENSRNOG00000017821;ENSRNOG00000020679;ENSRNOG00000023588;ENSRNOG00000028629;ENSRNOG00000049560;ENSRNOG00000050214;ENSRNOG00000059714	0.0018726
GO:0042176	regulation of protein catabolic process					52	329	ENSRNOG00000001719;ENSRNOG00000001829;ENSRNOG00000004107;ENSRNOG00000004332;ENSRNOG00000004649;ENSRNOG00000005195;ENSRNOG00000005257;ENSRNOG00000005276;ENSRNOG00000006302;ENSRNOG00000006326;ENSRNOG00000006328;ENSRNOG00000007916;ENSRNOG00000009887;ENSRNOG00000010362;ENSRNOG00000010479;ENSRNOG00000011414;ENSRNOG00000011951;ENSRNOG00000012026;ENSRNOG00000012237;ENSRNOG00000014204;ENSRNOG00000014448;…	0.000140231	40	329	ENSRNOG00000004100;ENSRNOG00000005257;ENSRNOG00000005276;ENSRNOG00000005333;ENSRNOG00000006302;ENSRNOG00000006326;ENSRNOG00000008551;ENSRNOG00000009946;ENSRNOG00000011414;ENSRNOG00000012026;ENSRNOG00000014204;ENSRNOG00000014448;ENSRNOG00000015206;ENSRNOG00000016122;ENSRNOG00000016309;ENSRNOG00000016456;ENSRNOG00000016460;ENSRNOG00000016496;ENSRNOG00000016967;ENSRNOG00000017106;ENSRNOG00000017702;…	0.00221821
GO:0042180	cellular ketone metabolic process					42	155	ENSRNOG00000000658;ENSRNOG00000001889;ENSRNOG00000002478;ENSRNOG00000002989;ENSRNOG00000003228;ENSRNOG00000003709;ENSRNOG00000004172;ENSRNOG00000004649;ENSRNOG00000006331;ENSRNOG00000006675;ENSRNOG00000008377;ENSRNOG00000009488;ENSRNOG00000009565;ENSRNOG00000009615;ENSRNOG00000011861;ENSRNOG00000012879;ENSRNOG00000012911;ENSRNOG00000014254;ENSRNOG00000014522;ENSRNOG00000014597;ENSRNOG00000014806;…	3.17515e-10	32	155	ENSRNOG00000000658;ENSRNOG00000002478;ENSRNOG00000002989;ENSRNOG00000003228;ENSRNOG00000008377;ENSRNOG00000009488;ENSRNOG00000009565;ENSRNOG00000009615;ENSRNOG00000011612;ENSRNOG00000012911;ENSRNOG00000013763;ENSRNOG00000014522;ENSRNOG00000014806;ENSRNOG00000016097;ENSRNOG00000016122;ENSRNOG00000016190;ENSRNOG00000016727;ENSRNOG00000017672;ENSRNOG00000017866;ENSRNOG00000018114;ENSRNOG00000018677;…	2.99017e-07
GO:0042304	regulation of fatty acid biosynthetic process					14	29	ENSRNOG00000002478;ENSRNOG00000003228;ENSRNOG00000004649;ENSRNOG00000006331;ENSRNOG00000008377;ENSRNOG00000009488;ENSRNOG00000009565;ENSRNOG00000012911;ENSRNOG00000018114;ENSRNOG00000018402;ENSRNOG00000020578;ENSRNOG00000020853;ENSRNOG00000047503;ENSRNOG00000049497	8.67065e-07	11	29	ENSRNOG00000002478;ENSRNOG00000003228;ENSRNOG00000008377;ENSRNOG00000009488;ENSRNOG00000009565;ENSRNOG00000012911;ENSRNOG00000013763;ENSRNOG00000018114;ENSRNOG00000020578;ENSRNOG00000020853;ENSRNOG00000047503	4.17946e-05
GO:0042493	response to drug					140	1048	ENSRNOG00000000053;ENSRNOG00000000322;ENSRNOG00000000521;ENSRNOG00000000571;ENSRNOG00000000604;ENSRNOG00000000658;ENSRNOG00000000796;ENSRNOG00000000853;ENSRNOG00000000967;ENSRNOG00000001148;ENSRNOG00000001797;ENSRNOG00000001889;ENSRNOG00000001926;ENSRNOG00000002115;ENSRNOG00000002636;ENSRNOG00000002693;ENSRNOG00000002818;ENSRNOG00000002839;ENSRNOG00000002991;ENSRNOG00000003253;ENSRNOG00000003500;…	3.16775e-07	117	1048	ENSRNOG00000000053;ENSRNOG00000000158;ENSRNOG00000000521;ENSRNOG00000000604;ENSRNOG00000000658;ENSRNOG00000000796;ENSRNOG00000000967;ENSRNOG00000001229;ENSRNOG00000001738;ENSRNOG00000001797;ENSRNOG00000001926;ENSRNOG00000002050;ENSRNOG00000002292;ENSRNOG00000002636;ENSRNOG00000002818;ENSRNOG00000002839;ENSRNOG00000003563;ENSRNOG00000003977;ENSRNOG00000004060;ENSRNOG00000004280;ENSRNOG00000004294;…	2.33951e-07
GO:0042542	response to hydrogen peroxide					27	137	ENSRNOG00000000571;ENSRNOG00000000604;ENSRNOG00000002115;ENSRNOG00000003977;ENSRNOG00000005195;ENSRNOG00000005418;ENSRNOG00000006589;ENSRNOG00000006675;ENSRNOG00000008364;ENSRNOG00000010558;ENSRNOG00000012081;ENSRNOG00000012772;ENSRNOG00000014117;ENSRNOG00000014525;ENSRNOG00000015385;ENSRNOG00000018289;ENSRNOG00000020660;ENSRNOG00000021201;ENSRNOG00000025443;ENSRNOG00000026293;ENSRNOG00000028493;…	0.000495592	18	137	ENSRNOG00000000604;ENSRNOG00000003977;ENSRNOG00000006067;ENSRNOG00000006589;ENSRNOG00000008364;ENSRNOG00000010558;ENSRNOG00000012772;ENSRNOG00000014117;ENSRNOG00000014525;ENSRNOG00000014604;ENSRNOG00000016885;ENSRNOG00000016907;ENSRNOG00000017765;ENSRNOG00000025443;ENSRNOG00000029042;ENSRNOG00000030715;ENSRNOG00000034015;ENSRNOG00000056076	0.0398406
GO:0042592	homeostatic process					167	1590	ENSRNOG00000000264;ENSRNOG00000000322;ENSRNOG00000000411;ENSRNOG00000000658;ENSRNOG00000000923;ENSRNOG00000000967;ENSRNOG00000001142;ENSRNOG00000001285;ENSRNOG00000001420;ENSRNOG00000001889;ENSRNOG00000001926;ENSRNOG00000002115;ENSRNOG00000002609;ENSRNOG00000002636;ENSRNOG00000002642;ENSRNOG00000002671;ENSRNOG00000002693;ENSRNOG00000003232;ENSRNOG00000003500;ENSRNOG00000003649;ENSRNOG00000003679;…	0.00867267	137	1590	ENSRNOG00000000264;ENSRNOG00000000658;ENSRNOG00000000967;ENSRNOG00000001050;ENSRNOG00000001142;ENSRNOG00000001285;ENSRNOG00000001738;ENSRNOG00000001890;ENSRNOG00000001926;ENSRNOG00000002292;ENSRNOG00000002636;ENSRNOG00000002642;ENSRNOG00000003232;ENSRNOG00000003302;ENSRNOG00000004060;ENSRNOG00000004377;ENSRNOG00000004466;ENSRNOG00000004662;ENSRNOG00000005257;ENSRNOG00000005308;ENSRNOG00000005331;…	0.00545262
GO:0042593	glucose homeostasis					33	223	ENSRNOG00000000967;ENSRNOG00000001420;ENSRNOG00000002609;ENSRNOG00000002671;ENSRNOG00000002693;ENSRNOG00000004172;ENSRNOG00000005257;ENSRNOG00000006302;ENSRNOG00000006388;ENSRNOG00000006622;ENSRNOG00000009488;ENSRNOG00000009565;ENSRNOG00000009884;ENSRNOG00000014256;ENSRNOG00000016723;ENSRNOG00000017808;ENSRNOG00000018289;ENSRNOG00000018903;ENSRNOG00000019113;ENSRNOG00000019302;ENSRNOG00000019587;…	0.0116762	28	223	ENSRNOG00000000967;ENSRNOG00000005257;ENSRNOG00000006302;ENSRNOG00000006388;ENSRNOG00000006622;ENSRNOG00000007990;ENSRNOG00000008578;ENSRNOG00000009488;ENSRNOG00000009565;ENSRNOG00000009882;ENSRNOG00000013409;ENSRNOG00000013507;ENSRNOG00000015518;ENSRNOG00000016122;ENSRNOG00000018233;ENSRNOG00000019113;ENSRNOG00000019587;ENSRNOG00000019742;ENSRNOG00000020679;ENSRNOG00000023150;ENSRNOG00000025053;…	0.0102904
GO:0042594	response to starvation					31	169	ENSRNOG00000000164;ENSRNOG00000000165;ENSRNOG00000000322;ENSRNOG00000000521;ENSRNOG00000000967;ENSRNOG00000001189;ENSRNOG00000001889;ENSRNOG00000002911;ENSRNOG00000003745;ENSRNOG00000006305;ENSRNOG00000009063;ENSRNOG00000009565;ENSRNOG00000009615;ENSRNOG00000009845;ENSRNOG00000012582;ENSRNOG00000014256;ENSRNOG00000014314;ENSRNOG00000016967;ENSRNOG00000017417;ENSRNOG00000017801;ENSRNOG00000018304;…	0.000541238	23	169	ENSRNOG00000000164;ENSRNOG00000000165;ENSRNOG00000000521;ENSRNOG00000000967;ENSRNOG00000001050;ENSRNOG00000006305;ENSRNOG00000009565;ENSRNOG00000009615;ENSRNOG00000009845;ENSRNOG00000013704;ENSRNOG00000016827;ENSRNOG00000016967;ENSRNOG00000018233;ENSRNOG00000018566;ENSRNOG00000018740;ENSRNOG00000019428;ENSRNOG00000020235;ENSRNOG00000025443;ENSRNOG00000028616;ENSRNOG00000036662;ENSRNOG00000046763;…	0.010168
GO:0042737	drug catabolic process					24	113	ENSRNOG00000001889;ENSRNOG00000003253;ENSRNOG00000003763;ENSRNOG00000006460;ENSRNOG00000008364;ENSRNOG00000008798;ENSRNOG00000008988;ENSRNOG00000011599;ENSRNOG00000011861;ENSRNOG00000012084;ENSRNOG00000012458;ENSRNOG00000013223;ENSRNOG00000013911;ENSRNOG00000014064;ENSRNOG00000014241;ENSRNOG00000016348;ENSRNOG00000017105;ENSRNOG00000021924;ENSRNOG00000028616;ENSRNOG00000028891;ENSRNOG00000031004;…	0.000401373	19	113	ENSRNOG00000001967;ENSRNOG00000002701;ENSRNOG00000004601;ENSRNOG00000008364;ENSRNOG00000008798;ENSRNOG00000008988;ENSRNOG00000011599;ENSRNOG00000012084;ENSRNOG00000012458;ENSRNOG00000013223;ENSRNOG00000013911;ENSRNOG00000017105;ENSRNOG00000020817;ENSRNOG00000021924;ENSRNOG00000028616;ENSRNOG00000028891;ENSRNOG00000033164;ENSRNOG00000039494;ENSRNOG00000050214	0.00267701
GO:0042886	amide transport					179	1505	ENSRNOG00000000053;ENSRNOG00000000150;ENSRNOG00000000164;ENSRNOG00000000314;ENSRNOG00000000322;ENSRNOG00000000520;ENSRNOG00000000521;ENSRNOG00000000557;ENSRNOG00000000571;ENSRNOG00000000796;ENSRNOG00000000841;ENSRNOG00000000853;ENSRNOG00000000967;ENSRNOG00000001083;ENSRNOG00000001173;ENSRNOG00000001415;ENSRNOG00000001420;ENSRNOG00000001436;ENSRNOG00000001709;ENSRNOG00000002039;ENSRNOG00000002144;…	8.66326e-06	145	1505	ENSRNOG00000000053;ENSRNOG00000000096;ENSRNOG00000000150;ENSRNOG00000000164;ENSRNOG00000000470;ENSRNOG00000000520;ENSRNOG00000000521;ENSRNOG00000000796;ENSRNOG00000000967;ENSRNOG00000001083;ENSRNOG00000001173;ENSRNOG00000001258;ENSRNOG00000001415;ENSRNOG00000001436;ENSRNOG00000002039;ENSRNOG00000002251;ENSRNOG00000002615;ENSRNOG00000002636;ENSRNOG00000002735;ENSRNOG00000002878;ENSRNOG00000003232;…	2.34656e-05
GO:0042981	regulation of apoptotic process					142	1214	ENSRNOG00000000322;ENSRNOG00000000521;ENSRNOG00000000527;ENSRNOG00000000827;ENSRNOG00000000853;ENSRNOG00000001139;ENSRNOG00000001271;ENSRNOG00000001420;ENSRNOG00000001829;ENSRNOG00000002115;ENSRNOG00000002618;ENSRNOG00000002671;ENSRNOG00000002911;ENSRNOG00000003223;ENSRNOG00000003232;ENSRNOG00000003256;ENSRNOG00000003497;ENSRNOG00000003689;ENSRNOG00000003745;ENSRNOG00000003977;ENSRNOG00000004196;…	0.000306863	106	1214	ENSRNOG00000000521;ENSRNOG00000000527;ENSRNOG00000000827;ENSRNOG00000002618;ENSRNOG00000002946;ENSRNOG00000003232;ENSRNOG00000003256;ENSRNOG00000003302;ENSRNOG00000003977;ENSRNOG00000004284;ENSRNOG00000004294;ENSRNOG00000004964;ENSRNOG00000005276;ENSRNOG00000005615;ENSRNOG00000005796;ENSRNOG00000005882;ENSRNOG00000006067;ENSRNOG00000006302;ENSRNOG00000006380;ENSRNOG00000006756;ENSRNOG00000006787;…	0.0136967
GO:0043066	negative regulation of apoptotic process					98	732	ENSRNOG00000000322;ENSRNOG00000000521;ENSRNOG00000000827;ENSRNOG00000000853;ENSRNOG00000001829;ENSRNOG00000002115;ENSRNOG00000002618;ENSRNOG00000002671;ENSRNOG00000002911;ENSRNOG00000003256;ENSRNOG00000003497;ENSRNOG00000003689;ENSRNOG00000003977;ENSRNOG00000004332;ENSRNOG00000004364;ENSRNOG00000004649;ENSRNOG00000005276;ENSRNOG00000005418;ENSRNOG00000005796;ENSRNOG00000006302;ENSRNOG00000006338;…	3.97904e-05	66	732	ENSRNOG00000000521;ENSRNOG00000000827;ENSRNOG00000002618;ENSRNOG00000002946;ENSRNOG00000003256;ENSRNOG00000003977;ENSRNOG00000004294;ENSRNOG00000004964;ENSRNOG00000005276;ENSRNOG00000005796;ENSRNOG00000005882;ENSRNOG00000006302;ENSRNOG00000006380;ENSRNOG00000006787;ENSRNOG00000007029;ENSRNOG00000007089;ENSRNOG00000007545;ENSRNOG00000008364;ENSRNOG00000008393;ENSRNOG00000009565;ENSRNOG00000009568;…	0.0446061
GO:0043067	regulation of programmed cell death					144	1236	ENSRNOG00000000322;ENSRNOG00000000521;ENSRNOG00000000527;ENSRNOG00000000827;ENSRNOG00000000853;ENSRNOG00000001139;ENSRNOG00000001271;ENSRNOG00000001420;ENSRNOG00000001829;ENSRNOG00000002115;ENSRNOG00000002618;ENSRNOG00000002671;ENSRNOG00000002911;ENSRNOG00000003223;ENSRNOG00000003232;ENSRNOG00000003256;ENSRNOG00000003497;ENSRNOG00000003689;ENSRNOG00000003745;ENSRNOG00000003977;ENSRNOG00000004196;…	0.000320563	107	1236	ENSRNOG00000000521;ENSRNOG00000000527;ENSRNOG00000000827;ENSRNOG00000002618;ENSRNOG00000002946;ENSRNOG00000003232;ENSRNOG00000003256;ENSRNOG00000003302;ENSRNOG00000003977;ENSRNOG00000004284;ENSRNOG00000004294;ENSRNOG00000004964;ENSRNOG00000005276;ENSRNOG00000005615;ENSRNOG00000005796;ENSRNOG00000005882;ENSRNOG00000006067;ENSRNOG00000006302;ENSRNOG00000006380;ENSRNOG00000006756;ENSRNOG00000006787;…	0.016269
GO:0043069	negative regulation of programmed cell death					99	748	ENSRNOG00000000322;ENSRNOG00000000521;ENSRNOG00000000827;ENSRNOG00000000853;ENSRNOG00000001829;ENSRNOG00000002115;ENSRNOG00000002618;ENSRNOG00000002671;ENSRNOG00000002911;ENSRNOG00000003256;ENSRNOG00000003497;ENSRNOG00000003689;ENSRNOG00000003977;ENSRNOG00000004332;ENSRNOG00000004364;ENSRNOG00000004649;ENSRNOG00000005276;ENSRNOG00000005418;ENSRNOG00000005796;ENSRNOG00000006302;ENSRNOG00000006338;…	5.80643e-05	67	748	ENSRNOG00000000521;ENSRNOG00000000827;ENSRNOG00000002618;ENSRNOG00000002946;ENSRNOG00000003256;ENSRNOG00000003977;ENSRNOG00000004294;ENSRNOG00000004964;ENSRNOG00000005276;ENSRNOG00000005796;ENSRNOG00000005882;ENSRNOG00000006302;ENSRNOG00000006380;ENSRNOG00000006787;ENSRNOG00000007029;ENSRNOG00000007089;ENSRNOG00000007545;ENSRNOG00000008364;ENSRNOG00000008393;ENSRNOG00000009565;ENSRNOG00000009568;…	0.0476739
GO:0043161	proteasome-mediated ubiquitin-dependent protein catabolic process					43	345	ENSRNOG00000001602;ENSRNOG00000001719;ENSRNOG00000001829;ENSRNOG00000004006;ENSRNOG00000004130;ENSRNOG00000005310;ENSRNOG00000006302;ENSRNOG00000006328;ENSRNOG00000006751;ENSRNOG00000007114;ENSRNOG00000008214;ENSRNOG00000008604;ENSRNOG00000009887;ENSRNOG00000011951;ENSRNOG00000011987;ENSRNOG00000012911;ENSRNOG00000014448;ENSRNOG00000016456;ENSRNOG00000016460;ENSRNOG00000018289;ENSRNOG00000018698;…	0.0485046	40	345	ENSRNOG00000000438;ENSRNOG00000002341;ENSRNOG00000004100;ENSRNOG00000005310;ENSRNOG00000006302;ENSRNOG00000006345;ENSRNOG00000008214;ENSRNOG00000010727;ENSRNOG00000012862;ENSRNOG00000012911;ENSRNOG00000013763;ENSRNOG00000014097;ENSRNOG00000014448;ENSRNOG00000014986;ENSRNOG00000016456;ENSRNOG00000016460;ENSRNOG00000017106;ENSRNOG00000018698;ENSRNOG00000018825;ENSRNOG00000019282;ENSRNOG00000019299;…	0.0053188
GO:0043200	response to amino acid					20	122	ENSRNOG00000004332;ENSRNOG00000006302;ENSRNOG00000007235;ENSRNOG00000008012;ENSRNOG00000008553;ENSRNOG00000009615;ENSRNOG00000010989;ENSRNOG00000013271;ENSRNOG00000015206;ENSRNOG00000015320;ENSRNOG00000018304;ENSRNOG00000018964;ENSRNOG00000019113;ENSRNOG00000020660;ENSRNOG00000020990;ENSRNOG00000027028;ENSRNOG00000028616;ENSRNOG00000034015;ENSRNOG00000054423;ENSRNOG00000055579	0.0303357	21	122	ENSRNOG00000000158;ENSRNOG00000002292;ENSRNOG00000006067;ENSRNOG00000006302;ENSRNOG00000007235;ENSRNOG00000008012;ENSRNOG00000008837;ENSRNOG00000009615;ENSRNOG00000013409;ENSRNOG00000013704;ENSRNOG00000015206;ENSRNOG00000015320;ENSRNOG00000018237;ENSRNOG00000018964;ENSRNOG00000019113;ENSRNOG00000020016;ENSRNOG00000020679;ENSRNOG00000022485;ENSRNOG00000028616;ENSRNOG00000034015;ENSRNOG00000051258	0.00098816
GO:0043434	response to peptide hormone					69	388	ENSRNOG00000000165;ENSRNOG00000001007;ENSRNOG00000001436;ENSRNOG00000002393;ENSRNOG00000002478;ENSRNOG00000002572;ENSRNOG00000002671;ENSRNOG00000003253;ENSRNOG00000004172;ENSRNOG00000004284;ENSRNOG00000004377;ENSRNOG00000004649;ENSRNOG00000005513;ENSRNOG00000006302;ENSRNOG00000006338;ENSRNOG00000006589;ENSRNOG00000006622;ENSRNOG00000006859;ENSRNOG00000007041;ENSRNOG00000007607;ENSRNOG00000007916;…	5.82374e-08	58	388	ENSRNOG00000000158;ENSRNOG00000000165;ENSRNOG00000001007;ENSRNOG00000001436;ENSRNOG00000002393;ENSRNOG00000002478;ENSRNOG00000002572;ENSRNOG00000002946;ENSRNOG00000004072;ENSRNOG00000004284;ENSRNOG00000004377;ENSRNOG00000005513;ENSRNOG00000006302;ENSRNOG00000006380;ENSRNOG00000006589;ENSRNOG00000006622;ENSRNOG00000006859;ENSRNOG00000006989;ENSRNOG00000008012;ENSRNOG00000008047;ENSRNOG00000008364;…	1.51226e-07
GO:0043467	regulation of generation of precursor metabolites and energy					21	99	ENSRNOG00000005418;ENSRNOG00000006589;ENSRNOG00000008047;ENSRNOG00000009063;ENSRNOG00000009615;ENSRNOG00000010452;ENSRNOG00000010558;ENSRNOG00000011474;ENSRNOG00000014597;ENSRNOG00000015385;ENSRNOG00000018289;ENSRNOG00000019742;ENSRNOG00000036692;ENSRNOG00000038951;ENSRNOG00000042903;ENSRNOG00000049497;ENSRNOG00000050585;ENSRNOG00000056076;ENSRNOG00000056457;ENSRNOG00000058249;ENSRNOG00000061527	0.00118591	15	99	ENSRNOG00000000610;ENSRNOG00000003302;ENSRNOG00000006589;ENSRNOG00000008047;ENSRNOG00000009615;ENSRNOG00000010558;ENSRNOG00000018677;ENSRNOG00000019742;ENSRNOG00000028629;ENSRNOG00000034242;ENSRNOG00000047781;ENSRNOG00000050585;ENSRNOG00000056076;ENSRNOG00000056457;ENSRNOG00000058249	0.0242626
GO:0043484	regulation of RNA splicing					21	115	ENSRNOG00000000520;ENSRNOG00000001783;ENSRNOG00000002871;ENSRNOG00000003714;ENSRNOG00000005513;ENSRNOG00000007532;ENSRNOG00000009977;ENSRNOG00000010379;ENSRNOG00000010737;ENSRNOG00000014562;ENSRNOG00000018153;ENSRNOG00000018903;ENSRNOG00000019113;ENSRNOG00000020763;ENSRNOG00000023360;ENSRNOG00000024278;ENSRNOG00000030126;ENSRNOG00000030680;ENSRNOG00000031387;ENSRNOG00000055579;ENSRNOG00000057464	0.00764756	18	115	ENSRNOG00000000520;ENSRNOG00000002871;ENSRNOG00000005513;ENSRNOG00000006380;ENSRNOG00000006420;ENSRNOG00000011667;ENSRNOG00000015914;ENSRNOG00000015999;ENSRNOG00000019027;ENSRNOG00000019113;ENSRNOG00000020235;ENSRNOG00000020763;ENSRNOG00000023360;ENSRNOG00000024278;ENSRNOG00000025768;ENSRNOG00000030126;ENSRNOG00000031387;ENSRNOG00000045791	0.0079373
GO:0043632	modification-dependent macromolecule catabolic process					63	540	ENSRNOG00000001598;ENSRNOG00000001602;ENSRNOG00000001719;ENSRNOG00000001829;ENSRNOG00000004006;ENSRNOG00000004107;ENSRNOG00000004130;ENSRNOG00000004637;ENSRNOG00000005310;ENSRNOG00000006302;ENSRNOG00000006328;ENSRNOG00000006663;ENSRNOG00000006751;ENSRNOG00000007114;ENSRNOG00000007916;ENSRNOG00000008214;ENSRNOG00000008604;ENSRNOG00000009887;ENSRNOG00000011951;ENSRNOG00000011987;ENSRNOG00000012001;…	0.0391706	57	540	ENSRNOG00000000438;ENSRNOG00000002341;ENSRNOG00000003261;ENSRNOG00000004100;ENSRNOG00000005310;ENSRNOG00000006302;ENSRNOG00000006345;ENSRNOG00000006663;ENSRNOG00000008214;ENSRNOG00000008551;ENSRNOG00000009245;ENSRNOG00000010727;ENSRNOG00000012026;ENSRNOG00000012862;ENSRNOG00000012911;ENSRNOG00000013763;ENSRNOG00000014097;ENSRNOG00000014448;ENSRNOG00000014674;ENSRNOG00000014986;ENSRNOG00000016456;…	0.00397716
GO:0044042	glucan metabolic process					17	62	ENSRNOG00000001269;ENSRNOG00000002642;ENSRNOG00000006388;ENSRNOG00000008047;ENSRNOG00000009615;ENSRNOG00000009845;ENSRNOG00000011474;ENSRNOG00000013963;ENSRNOG00000014597;ENSRNOG00000016214;ENSRNOG00000018494;ENSRNOG00000020254;ENSRNOG00000036692;ENSRNOG00000047656;ENSRNOG00000051171;ENSRNOG00000059753;ENSRNOG00000061527	0.000238984	15	62	ENSRNOG00000001269;ENSRNOG00000002642;ENSRNOG00000006388;ENSRNOG00000008047;ENSRNOG00000008079;ENSRNOG00000009615;ENSRNOG00000009845;ENSRNOG00000013963;ENSRNOG00000018494;ENSRNOG00000018677;ENSRNOG00000020254;ENSRNOG00000028629;ENSRNOG00000047656;ENSRNOG00000051171;ENSRNOG00000059753	0.000252775
GO:0044092	negative regulation of molecular function					124	955	ENSRNOG00000000068;ENSRNOG00000000521;ENSRNOG00000000604;ENSRNOG00000000658;ENSRNOG00000001173;ENSRNOG00000001189;ENSRNOG00000001806;ENSRNOG00000002783;ENSRNOG00000003048;ENSRNOG00000003232;ENSRNOG00000003500;ENSRNOG00000003679;ENSRNOG00000003977;ENSRNOG00000004060;ENSRNOG00000004107;ENSRNOG00000004637;ENSRNOG00000004649;ENSRNOG00000005195;ENSRNOG00000005276;ENSRNOG00000005615;ENSRNOG00000006338;…	8.67801e-06	90	955	ENSRNOG00000000068;ENSRNOG00000000521;ENSRNOG00000000604;ENSRNOG00000000658;ENSRNOG00000001173;ENSRNOG00000002783;ENSRNOG00000003232;ENSRNOG00000003977;ENSRNOG00000004060;ENSRNOG00000004100;ENSRNOG00000005276;ENSRNOG00000005615;ENSRNOG00000006709;ENSRNOG00000006787;ENSRNOG00000007029;ENSRNOG00000007091;ENSRNOG00000007229;ENSRNOG00000007237;ENSRNOG00000007457;ENSRNOG00000007545;ENSRNOG00000008364;…	0.004071
GO:0044242	cellular lipid catabolic process					43	168	ENSRNOG00000000571;ENSRNOG00000000658;ENSRNOG00000000815;ENSRNOG00000001177;ENSRNOG00000003500;ENSRNOG00000004377;ENSRNOG00000005542;ENSRNOG00000006675;ENSRNOG00000006779;ENSRNOG00000008167;ENSRNOG00000008474;ENSRNOG00000008755;ENSRNOG00000009615;ENSRNOG00000009845;ENSRNOG00000010034;ENSRNOG00000010128;ENSRNOG00000011622;ENSRNOG00000011684;ENSRNOG00000012879;ENSRNOG00000014254;ENSRNOG00000014508;…	1.25362e-09	32	168	ENSRNOG00000000658;ENSRNOG00000004089;ENSRNOG00000004377;ENSRNOG00000004601;ENSRNOG00000005542;ENSRNOG00000006779;ENSRNOG00000008167;ENSRNOG00000008474;ENSRNOG00000008755;ENSRNOG00000009615;ENSRNOG00000009845;ENSRNOG00000009946;ENSRNOG00000010128;ENSRNOG00000011622;ENSRNOG00000013704;ENSRNOG00000014522;ENSRNOG00000015519;ENSRNOG00000018044;ENSRNOG00000018114;ENSRNOG00000018677;ENSRNOG00000018920;…	2.06488e-06
GO:0044248	cellular catabolic process					262	1761	ENSRNOG00000000164;ENSRNOG00000000322;ENSRNOG00000000571;ENSRNOG00000000658;ENSRNOG00000000815;ENSRNOG00000001177;ENSRNOG00000001391;ENSRNOG00000001420;ENSRNOG00000001598;ENSRNOG00000001602;ENSRNOG00000001719;ENSRNOG00000001829;ENSRNOG00000001889;ENSRNOG00000002186;ENSRNOG00000002225;ENSRNOG00000002358;ENSRNOG00000002636;ENSRNOG00000002735;ENSRNOG00000002828;ENSRNOG00000003147;ENSRNOG00000003253;…	3.29763e-20	221	1761	ENSRNOG00000000158;ENSRNOG00000000164;ENSRNOG00000000422;ENSRNOG00000000438;ENSRNOG00000000582;ENSRNOG00000000658;ENSRNOG00000001293;ENSRNOG00000001391;ENSRNOG00000001738;ENSRNOG00000001967;ENSRNOG00000002186;ENSRNOG00000002292;ENSRNOG00000002341;ENSRNOG00000002358;ENSRNOG00000002636;ENSRNOG00000002701;ENSRNOG00000002735;ENSRNOG00000003147;ENSRNOG00000003261;ENSRNOG00000003302;ENSRNOG00000004089;…	1.68678e-20
GO:0044249	cellular biosynthetic process					517	5108	ENSRNOG00000000053;ENSRNOG00000000064;ENSRNOG00000000150;ENSRNOG00000000185;ENSRNOG00000000322;ENSRNOG00000000397;ENSRNOG00000000411;ENSRNOG00000000461;ENSRNOG00000000467;ENSRNOG00000000488;ENSRNOG00000000521;ENSRNOG00000000604;ENSRNOG00000000658;ENSRNOG00000000799;ENSRNOG00000000808;ENSRNOG00000000815;ENSRNOG00000000841;ENSRNOG00000000853;ENSRNOG00000000867;ENSRNOG00000000909;ENSRNOG00000000923;…	4.22262e-07	385	5108	ENSRNOG00000000053;ENSRNOG00000000064;ENSRNOG00000000150;ENSRNOG00000000158;ENSRNOG00000000397;ENSRNOG00000000461;ENSRNOG00000000521;ENSRNOG00000000604;ENSRNOG00000000658;ENSRNOG00000000799;ENSRNOG00000000903;ENSRNOG00000001030;ENSRNOG00000001050;ENSRNOG00000001106;ENSRNOG00000001142;ENSRNOG00000001239;ENSRNOG00000001647;ENSRNOG00000001653;ENSRNOG00000001738;ENSRNOG00000001797;ENSRNOG00000001823;…	0.00316203
GO:0044257	cellular protein catabolic process					85	669	ENSRNOG00000000164;ENSRNOG00000001598;ENSRNOG00000001602;ENSRNOG00000001719;ENSRNOG00000001829;ENSRNOG00000002358;ENSRNOG00000004006;ENSRNOG00000004107;ENSRNOG00000004130;ENSRNOG00000004464;ENSRNOG00000004637;ENSRNOG00000005257;ENSRNOG00000005310;ENSRNOG00000006143;ENSRNOG00000006302;ENSRNOG00000006326;ENSRNOG00000006328;ENSRNOG00000006663;ENSRNOG00000006751;ENSRNOG00000007114;ENSRNOG00000007916;…	0.0010123	73	669	ENSRNOG00000000164;ENSRNOG00000000438;ENSRNOG00000001293;ENSRNOG00000002341;ENSRNOG00000002358;ENSRNOG00000003261;ENSRNOG00000004100;ENSRNOG00000004464;ENSRNOG00000005257;ENSRNOG00000005310;ENSRNOG00000006302;ENSRNOG00000006326;ENSRNOG00000006345;ENSRNOG00000006663;ENSRNOG00000007089;ENSRNOG00000008214;ENSRNOG00000008551;ENSRNOG00000009946;ENSRNOG00000010725;ENSRNOG00000010727;ENSRNOG00000011414;…	0.00025676
GO:0044262	cellular carbohydrate metabolic process					45	241	ENSRNOG00000000165;ENSRNOG00000000658;ENSRNOG00000000796;ENSRNOG00000001189;ENSRNOG00000001269;ENSRNOG00000002225;ENSRNOG00000002642;ENSRNOG00000003712;ENSRNOG00000004172;ENSRNOG00000006388;ENSRNOG00000006622;ENSRNOG00000007041;ENSRNOG00000008047;ENSRNOG00000009565;ENSRNOG00000009615;ENSRNOG00000009845;ENSRNOG00000010196;ENSRNOG00000010482;ENSRNOG00000011474;ENSRNOG00000013911;ENSRNOG00000013963;…	7.6267e-06	37	241	ENSRNOG00000000165;ENSRNOG00000000658;ENSRNOG00000000796;ENSRNOG00000001269;ENSRNOG00000002642;ENSRNOG00000005861;ENSRNOG00000006388;ENSRNOG00000006622;ENSRNOG00000008047;ENSRNOG00000008079;ENSRNOG00000009565;ENSRNOG00000009615;ENSRNOG00000009845;ENSRNOG00000011613;ENSRNOG00000013911;ENSRNOG00000013949;ENSRNOG00000013963;ENSRNOG00000014168;ENSRNOG00000014522;ENSRNOG00000014565;ENSRNOG00000016349;…	3.63761e-05
GO:0044264	cellular polysaccharide metabolic process					18	85	ENSRNOG00000001269;ENSRNOG00000002642;ENSRNOG00000006388;ENSRNOG00000008047;ENSRNOG00000009615;ENSRNOG00000009845;ENSRNOG00000011474;ENSRNOG00000013963;ENSRNOG00000014597;ENSRNOG00000016214;ENSRNOG00000018494;ENSRNOG00000019014;ENSRNOG00000020254;ENSRNOG00000036692;ENSRNOG00000047656;ENSRNOG00000051171;ENSRNOG00000059753;ENSRNOG00000061527	0.00345117	16	85	ENSRNOG00000001269;ENSRNOG00000002642;ENSRNOG00000006388;ENSRNOG00000008047;ENSRNOG00000008079;ENSRNOG00000009615;ENSRNOG00000009845;ENSRNOG00000013963;ENSRNOG00000018494;ENSRNOG00000018677;ENSRNOG00000020254;ENSRNOG00000024886;ENSRNOG00000028629;ENSRNOG00000047656;ENSRNOG00000051171;ENSRNOG00000059753	0.00239372
GO:0044265	cellular macromolecule catabolic process					109	892	ENSRNOG00000000164;ENSRNOG00000001598;ENSRNOG00000001602;ENSRNOG00000001719;ENSRNOG00000001829;ENSRNOG00000002358;ENSRNOG00000002735;ENSRNOG00000002828;ENSRNOG00000003863;ENSRNOG00000004006;ENSRNOG00000004107;ENSRNOG00000004130;ENSRNOG00000004464;ENSRNOG00000004637;ENSRNOG00000004725;ENSRNOG00000004726;ENSRNOG00000005195;ENSRNOG00000005257;ENSRNOG00000005310;ENSRNOG00000006143;ENSRNOG00000006302;…	0.000503794	97	892	ENSRNOG00000000164;ENSRNOG00000000422;ENSRNOG00000000438;ENSRNOG00000001293;ENSRNOG00000002292;ENSRNOG00000002341;ENSRNOG00000002358;ENSRNOG00000002735;ENSRNOG00000003261;ENSRNOG00000004100;ENSRNOG00000004464;ENSRNOG00000004725;ENSRNOG00000004726;ENSRNOG00000005257;ENSRNOG00000005310;ENSRNOG00000006067;ENSRNOG00000006302;ENSRNOG00000006326;ENSRNOG00000006345;ENSRNOG00000006420;ENSRNOG00000006663;…	1.31094e-05
GO:0044267	cellular protein metabolic process					479	4677	ENSRNOG00000000068;ENSRNOG00000000150;ENSRNOG00000000164;ENSRNOG00000000322;ENSRNOG00000000411;ENSRNOG00000000467;ENSRNOG00000000521;ENSRNOG00000000527;ENSRNOG00000000571;ENSRNOG00000000604;ENSRNOG00000000796;ENSRNOG00000000799;ENSRNOG00000000841;ENSRNOG00000000847;ENSRNOG00000000853;ENSRNOG00000000867;ENSRNOG00000000900;ENSRNOG00000000909;ENSRNOG00000001139;ENSRNOG00000001142;ENSRNOG00000001148;…	4.46511e-07	370	4677	ENSRNOG00000000048;ENSRNOG00000000068;ENSRNOG00000000150;ENSRNOG00000000164;ENSRNOG00000000438;ENSRNOG00000000521;ENSRNOG00000000527;ENSRNOG00000000604;ENSRNOG00000000796;ENSRNOG00000000799;ENSRNOG00000001050;ENSRNOG00000001106;ENSRNOG00000001135;ENSRNOG00000001142;ENSRNOG00000001269;ENSRNOG00000001293;ENSRNOG00000001314;ENSRNOG00000001316;ENSRNOG00000001345;ENSRNOG00000001653;ENSRNOG00000001706;…	9.1949e-05
GO:0044270	cellular nitrogen compound catabolic process					58	413	ENSRNOG00000000815;ENSRNOG00000002186;ENSRNOG00000002735;ENSRNOG00000002828;ENSRNOG00000003709;ENSRNOG00000003773;ENSRNOG00000003863;ENSRNOG00000004726;ENSRNOG00000006589;ENSRNOG00000006807;ENSRNOG00000008639;ENSRNOG00000009094;ENSRNOG00000009615;ENSRNOG00000009977;ENSRNOG00000009982;ENSRNOG00000010580;ENSRNOG00000011785;ENSRNOG00000011910;ENSRNOG00000012314;ENSRNOG00000013791;ENSRNOG00000013948;…	0.00109554	55	413	ENSRNOG00000000422;ENSRNOG00000002186;ENSRNOG00000002292;ENSRNOG00000002735;ENSRNOG00000004726;ENSRNOG00000005266;ENSRNOG00000006067;ENSRNOG00000006420;ENSRNOG00000006589;ENSRNOG00000007081;ENSRNOG00000007570;ENSRNOG00000008639;ENSRNOG00000009094;ENSRNOG00000009245;ENSRNOG00000009615;ENSRNOG00000010262;ENSRNOG00000010537;ENSRNOG00000010580;ENSRNOG00000010799;ENSRNOG00000011612;ENSRNOG00000011728;…	1.31159e-05
GO:0044403	symbiont process					43	263	ENSRNOG00000000322;ENSRNOG00000000841;ENSRNOG00000001926;ENSRNOG00000001963;ENSRNOG00000002735;ENSRNOG00000003147;ENSRNOG00000003497;ENSRNOG00000003975;ENSRNOG00000004273;ENSRNOG00000005331;ENSRNOG00000006985;ENSRNOG00000008432;ENSRNOG00000008672;ENSRNOG00000009884;ENSRNOG00000010362;ENSRNOG00000011414;ENSRNOG00000011540;ENSRNOG00000011706;ENSRNOG00000012594;ENSRNOG00000012748;ENSRNOG00000013552;…	0.000348396	37	263	ENSRNOG00000001106;ENSRNOG00000001926;ENSRNOG00000001963;ENSRNOG00000002341;ENSRNOG00000002735;ENSRNOG00000002802;ENSRNOG00000003147;ENSRNOG00000005331;ENSRNOG00000005766;ENSRNOG00000006985;ENSRNOG00000007781;ENSRNOG00000008672;ENSRNOG00000009446;ENSRNOG00000011414;ENSRNOG00000011540;ENSRNOG00000012594;ENSRNOG00000013552;ENSRNOG00000014288;ENSRNOG00000014532;ENSRNOG00000014762;ENSRNOG00000015078;…	0.00024544
GO:0044419	interspecies interaction between organisms					44	288	ENSRNOG00000000322;ENSRNOG00000000841;ENSRNOG00000001926;ENSRNOG00000001963;ENSRNOG00000002735;ENSRNOG00000003147;ENSRNOG00000003497;ENSRNOG00000003975;ENSRNOG00000004273;ENSRNOG00000005331;ENSRNOG00000005825;ENSRNOG00000006985;ENSRNOG00000008432;ENSRNOG00000008672;ENSRNOG00000009884;ENSRNOG00000010362;ENSRNOG00000011414;ENSRNOG00000011540;ENSRNOG00000011706;ENSRNOG00000012594;ENSRNOG00000012748;…	0.00122961	38	288	ENSRNOG00000001106;ENSRNOG00000001926;ENSRNOG00000001963;ENSRNOG00000002341;ENSRNOG00000002735;ENSRNOG00000002802;ENSRNOG00000003147;ENSRNOG00000005331;ENSRNOG00000005766;ENSRNOG00000005825;ENSRNOG00000006985;ENSRNOG00000007781;ENSRNOG00000008672;ENSRNOG00000009446;ENSRNOG00000011414;ENSRNOG00000011540;ENSRNOG00000012594;ENSRNOG00000013552;ENSRNOG00000014288;ENSRNOG00000014532;ENSRNOG00000014762;…	0.000693963
GO:0045184	establishment of protein localization					186	1526	ENSRNOG00000000053;ENSRNOG00000000150;ENSRNOG00000000164;ENSRNOG00000000314;ENSRNOG00000000322;ENSRNOG00000000520;ENSRNOG00000000521;ENSRNOG00000000557;ENSRNOG00000000796;ENSRNOG00000000841;ENSRNOG00000000853;ENSRNOG00000000923;ENSRNOG00000000967;ENSRNOG00000001083;ENSRNOG00000001173;ENSRNOG00000001415;ENSRNOG00000001420;ENSRNOG00000001429;ENSRNOG00000001436;ENSRNOG00000001709;ENSRNOG00000002039;…	9.67219e-07	146	1526	ENSRNOG00000000053;ENSRNOG00000000096;ENSRNOG00000000150;ENSRNOG00000000164;ENSRNOG00000000470;ENSRNOG00000000520;ENSRNOG00000000521;ENSRNOG00000000796;ENSRNOG00000000967;ENSRNOG00000001083;ENSRNOG00000001173;ENSRNOG00000001258;ENSRNOG00000001293;ENSRNOG00000001415;ENSRNOG00000001436;ENSRNOG00000002039;ENSRNOG00000002251;ENSRNOG00000002615;ENSRNOG00000002636;ENSRNOG00000002735;ENSRNOG00000002878;…	3.10022e-05
GO:0045471	response to ethanol					25	160	ENSRNOG00000000053;ENSRNOG00000000604;ENSRNOG00000000967;ENSRNOG00000001926;ENSRNOG00000002115;ENSRNOG00000002636;ENSRNOG00000004959;ENSRNOG00000007235;ENSRNOG00000007964;ENSRNOG00000008140;ENSRNOG00000008364;ENSRNOG00000012458;ENSRNOG00000012582;ENSRNOG00000012772;ENSRNOG00000012840;ENSRNOG00000015206;ENSRNOG00000015320;ENSRNOG00000018740;ENSRNOG00000019407;ENSRNOG00000019742;ENSRNOG00000020723;…	0.0205959	22	160	ENSRNOG00000000053;ENSRNOG00000000158;ENSRNOG00000000604;ENSRNOG00000000967;ENSRNOG00000001738;ENSRNOG00000001926;ENSRNOG00000002636;ENSRNOG00000007235;ENSRNOG00000008364;ENSRNOG00000012458;ENSRNOG00000012772;ENSRNOG00000015206;ENSRNOG00000015320;ENSRNOG00000015518;ENSRNOG00000016122;ENSRNOG00000018237;ENSRNOG00000018740;ENSRNOG00000019742;ENSRNOG00000020679;ENSRNOG00000020723;ENSRNOG00000020918;…	0.0112537
GO:0045540	regulation of cholesterol biosynthetic process					6	13	ENSRNOG00000002115;ENSRNOG00000005542;ENSRNOG00000009488;ENSRNOG00000012911;ENSRNOG00000020776;ENSRNOG00000020853	0.00611428	5	13	ENSRNOG00000005542;ENSRNOG00000009488;ENSRNOG00000012911;ENSRNOG00000013763;ENSRNOG00000020853	0.0151937
GO:0045717	negative regulation of fatty acid biosynthetic process					7	11	ENSRNOG00000002478;ENSRNOG00000008377;ENSRNOG00000009488;ENSRNOG00000012911;ENSRNOG00000018114;ENSRNOG00000020578;ENSRNOG00000047503	0.00021937	8	11	ENSRNOG00000002478;ENSRNOG00000008377;ENSRNOG00000009488;ENSRNOG00000012911;ENSRNOG00000013763;ENSRNOG00000018114;ENSRNOG00000020578;ENSRNOG00000047503	2.8295e-06
GO:0045833	negative regulation of lipid metabolic process					19	64	ENSRNOG00000000068;ENSRNOG00000000658;ENSRNOG00000001189;ENSRNOG00000002115;ENSRNOG00000002478;ENSRNOG00000003500;ENSRNOG00000004649;ENSRNOG00000005618;ENSRNOG00000008377;ENSRNOG00000009488;ENSRNOG00000012911;ENSRNOG00000018114;ENSRNOG00000018402;ENSRNOG00000020578;ENSRNOG00000030019;ENSRNOG00000046889;ENSRNOG00000047503;ENSRNOG00000053306;ENSRNOG00000059880	2.32515e-05	12	64	ENSRNOG00000000068;ENSRNOG00000000658;ENSRNOG00000002478;ENSRNOG00000008377;ENSRNOG00000009488;ENSRNOG00000012911;ENSRNOG00000013763;ENSRNOG00000018114;ENSRNOG00000020578;ENSRNOG00000028629;ENSRNOG00000046889;ENSRNOG00000047503	0.0123412
GO:0045862	positive regulation of proteolysis					44	281	ENSRNOG00000000527;ENSRNOG00000000604;ENSRNOG00000001420;ENSRNOG00000001829;ENSRNOG00000004649;ENSRNOG00000006302;ENSRNOG00000006997;ENSRNOG00000007040;ENSRNOG00000007916;ENSRNOG00000009887;ENSRNOG00000010780;ENSRNOG00000011414;ENSRNOG00000011542;ENSRNOG00000011951;ENSRNOG00000012026;ENSRNOG00000012473;ENSRNOG00000013195;ENSRNOG00000014064;ENSRNOG00000014204;ENSRNOG00000014288;ENSRNOG00000014350;…	0.00074444	36	281	ENSRNOG00000000527;ENSRNOG00000000604;ENSRNOG00000004100;ENSRNOG00000006067;ENSRNOG00000006302;ENSRNOG00000007040;ENSRNOG00000007081;ENSRNOG00000007089;ENSRNOG00000011414;ENSRNOG00000012026;ENSRNOG00000013195;ENSRNOG00000014204;ENSRNOG00000014288;ENSRNOG00000015139;ENSRNOG00000015301;ENSRNOG00000016456;ENSRNOG00000016460;ENSRNOG00000016496;ENSRNOG00000017106;ENSRNOG00000017702;ENSRNOG00000018322;…	0.00179215
GO:0045922	negative regulation of fatty acid metabolic process					9	20	ENSRNOG00000000658;ENSRNOG00000002478;ENSRNOG00000008377;ENSRNOG00000009488;ENSRNOG00000012911;ENSRNOG00000018114;ENSRNOG00000020578;ENSRNOG00000046889;ENSRNOG00000047503	0.000379818	11	20	ENSRNOG00000000658;ENSRNOG00000002478;ENSRNOG00000008377;ENSRNOG00000009488;ENSRNOG00000012911;ENSRNOG00000013763;ENSRNOG00000018114;ENSRNOG00000020578;ENSRNOG00000028629;ENSRNOG00000046889;ENSRNOG00000047503	6.10696e-07
GO:0046320	regulation of fatty acid oxidation					10	30	ENSRNOG00000000658;ENSRNOG00000006675;ENSRNOG00000009565;ENSRNOG00000009615;ENSRNOG00000012879;ENSRNOG00000014254;ENSRNOG00000014522;ENSRNOG00000014597;ENSRNOG00000018114;ENSRNOG00000046889	0.00211603	8	30	ENSRNOG00000000658;ENSRNOG00000009565;ENSRNOG00000009615;ENSRNOG00000014522;ENSRNOG00000018114;ENSRNOG00000018677;ENSRNOG00000028629;ENSRNOG00000046889	0.00916915
GO:0046364	monosaccharide biosynthetic process					21	68	ENSRNOG00000000796;ENSRNOG00000001189;ENSRNOG00000003712;ENSRNOG00000003745;ENSRNOG00000004172;ENSRNOG00000006622;ENSRNOG00000009845;ENSRNOG00000015290;ENSRNOG00000016348;ENSRNOG00000016349;ENSRNOG00000016727;ENSRNOG00000017801;ENSRNOG00000020254;ENSRNOG00000023150;ENSRNOG00000028616;ENSRNOG00000051171;ENSRNOG00000051592;ENSRNOG00000056457;ENSRNOG00000056728;ENSRNOG00000058249;ENSRNOG00000061527	3.40285e-06	14	68	ENSRNOG00000000796;ENSRNOG00000006622;ENSRNOG00000009845;ENSRNOG00000015518;ENSRNOG00000016349;ENSRNOG00000016727;ENSRNOG00000019372;ENSRNOG00000020254;ENSRNOG00000023150;ENSRNOG00000028616;ENSRNOG00000051171;ENSRNOG00000056457;ENSRNOG00000056728;ENSRNOG00000058249	0.00237667
GO:0046390	ribose phosphate biosynthetic process					50	257	ENSRNOG00000000064;ENSRNOG00000000658;ENSRNOG00000001797;ENSRNOG00000002671;ENSRNOG00000002693;ENSRNOG00000002928;ENSRNOG00000003626;ENSRNOG00000004172;ENSRNOG00000006331;ENSRNOG00000006388;ENSRNOG00000006589;ENSRNOG00000006807;ENSRNOG00000006947;ENSRNOG00000007235;ENSRNOG00000007895;ENSRNOG00000008572;ENSRNOG00000009565;ENSRNOG00000010580;ENSRNOG00000012325;ENSRNOG00000014522;ENSRNOG00000014625;…	5.08364e-07	38	257	ENSRNOG00000000064;ENSRNOG00000000658;ENSRNOG00000001797;ENSRNOG00000003302;ENSRNOG00000006388;ENSRNOG00000006589;ENSRNOG00000006947;ENSRNOG00000007235;ENSRNOG00000007895;ENSRNOG00000008572;ENSRNOG00000009565;ENSRNOG00000009994;ENSRNOG00000010580;ENSRNOG00000010633;ENSRNOG00000012325;ENSRNOG00000014522;ENSRNOG00000014625;ENSRNOG00000015320;ENSRNOG00000016924;ENSRNOG00000018755;ENSRNOG00000019180;…	6.33742e-05
GO:0046394	carboxylic acid biosynthetic process					76	328	ENSRNOG00000000658;ENSRNOG00000001142;ENSRNOG00000002478;ENSRNOG00000002636;ENSRNOG00000002642;ENSRNOG00000002643;ENSRNOG00000002991;ENSRNOG00000003223;ENSRNOG00000003228;ENSRNOG00000003709;ENSRNOG00000004245;ENSRNOG00000004649;ENSRNOG00000005795;ENSRNOG00000006331;ENSRNOG00000006508;ENSRNOG00000006589;ENSRNOG00000006807;ENSRNOG00000007395;ENSRNOG00000008245;ENSRNOG00000008377;ENSRNOG00000008553;…	1.42689e-14	62	328	ENSRNOG00000000658;ENSRNOG00000000903;ENSRNOG00000001142;ENSRNOG00000002478;ENSRNOG00000002636;ENSRNOG00000002642;ENSRNOG00000003228;ENSRNOG00000005275;ENSRNOG00000006589;ENSRNOG00000007395;ENSRNOG00000007763;ENSRNOG00000008245;ENSRNOG00000008377;ENSRNOG00000008837;ENSRNOG00000009488;ENSRNOG00000009565;ENSRNOG00000009630;ENSRNOG00000010128;ENSRNOG00000010580;ENSRNOG00000011039;ENSRNOG00000011200;…	2.72308e-12
GO:0046415	urate metabolic process					4	9	ENSRNOG00000009982;ENSRNOG00000032745;ENSRNOG00000042692;ENSRNOG00000051171	0.0483613	4	9	ENSRNOG00000005302;ENSRNOG00000032745;ENSRNOG00000042692;ENSRNOG00000051171	0.0242626
GO:0046434	organophosphate catabolic process					29	199	ENSRNOG00000000815;ENSRNOG00000002186;ENSRNOG00000003500;ENSRNOG00000006589;ENSRNOG00000006807;ENSRNOG00000008167;ENSRNOG00000009094;ENSRNOG00000010482;ENSRNOG00000010580;ENSRNOG00000013791;ENSRNOG00000014522;ENSRNOG00000015290;ENSRNOG00000017895;ENSRNOG00000018397;ENSRNOG00000018402;ENSRNOG00000019742;ENSRNOG00000020420;ENSRNOG00000020723;ENSRNOG00000021233;ENSRNOG00000023150;ENSRNOG00000023587;…	0.0261801	26	199	ENSRNOG00000002186;ENSRNOG00000004089;ENSRNOG00000006589;ENSRNOG00000007570;ENSRNOG00000008167;ENSRNOG00000009094;ENSRNOG00000009946;ENSRNOG00000010580;ENSRNOG00000013791;ENSRNOG00000014522;ENSRNOG00000016321;ENSRNOG00000018397;ENSRNOG00000019742;ENSRNOG00000020420;ENSRNOG00000020723;ENSRNOG00000021233;ENSRNOG00000022576;ENSRNOG00000023150;ENSRNOG00000023587;ENSRNOG00000034242;ENSRNOG00000050585;…	0.00915361
GO:0046459	short-chain fatty acid metabolic process					5	11	ENSRNOG00000006508;ENSRNOG00000015519;ENSRNOG00000018044;ENSRNOG00000018755;ENSRNOG00000028616	0.0173343	4	11	ENSRNOG00000015519;ENSRNOG00000018044;ENSRNOG00000018755;ENSRNOG00000028616	0.0475834
GO:0046483	heterocycle metabolic process					505	4861	ENSRNOG00000000064;ENSRNOG00000000397;ENSRNOG00000000461;ENSRNOG00000000467;ENSRNOG00000000488;ENSRNOG00000000520;ENSRNOG00000000521;ENSRNOG00000000604;ENSRNOG00000000658;ENSRNOG00000000808;ENSRNOG00000000815;ENSRNOG00000000841;ENSRNOG00000000867;ENSRNOG00000000909;ENSRNOG00000000923;ENSRNOG00000000989;ENSRNOG00000001030;ENSRNOG00000001139;ENSRNOG00000001172;ENSRNOG00000001189;ENSRNOG00000001524;…	1.84963e-08	375	4861	ENSRNOG00000000064;ENSRNOG00000000397;ENSRNOG00000000422;ENSRNOG00000000461;ENSRNOG00000000520;ENSRNOG00000000521;ENSRNOG00000000604;ENSRNOG00000000658;ENSRNOG00000001030;ENSRNOG00000001050;ENSRNOG00000001203;ENSRNOG00000001314;ENSRNOG00000001647;ENSRNOG00000001797;ENSRNOG00000001967;ENSRNOG00000002186;ENSRNOG00000002292;ENSRNOG00000002341;ENSRNOG00000002389;ENSRNOG00000002393;ENSRNOG00000002408;…	0.000693963
GO:0046486	glycerolipid metabolic process					39	293	ENSRNOG00000001189;ENSRNOG00000002478;ENSRNOG00000003500;ENSRNOG00000004377;ENSRNOG00000004464;ENSRNOG00000005542;ENSRNOG00000007496;ENSRNOG00000008167;ENSRNOG00000008364;ENSRNOG00000009094;ENSRNOG00000010482;ENSRNOG00000012404;ENSRNOG00000012458;ENSRNOG00000012879;ENSRNOG00000013552;ENSRNOG00000014254;ENSRNOG00000014508;ENSRNOG00000015124;ENSRNOG00000015519;ENSRNOG00000016769;ENSRNOG00000016791;…	0.0274079	37	293	ENSRNOG00000002478;ENSRNOG00000004089;ENSRNOG00000004377;ENSRNOG00000004464;ENSRNOG00000005542;ENSRNOG00000007496;ENSRNOG00000008167;ENSRNOG00000008364;ENSRNOG00000009094;ENSRNOG00000009946;ENSRNOG00000010633;ENSRNOG00000012404;ENSRNOG00000012458;ENSRNOG00000013552;ENSRNOG00000013704;ENSRNOG00000014879;ENSRNOG00000015124;ENSRNOG00000015519;ENSRNOG00000016769;ENSRNOG00000016791;ENSRNOG00000017219;…	0.00190503
GO:0046496	nicotinamide nucleotide metabolic process					27	148	ENSRNOG00000003709;ENSRNOG00000006589;ENSRNOG00000006807;ENSRNOG00000009715;ENSRNOG00000009982;ENSRNOG00000015290;ENSRNOG00000017895;ENSRNOG00000019201;ENSRNOG00000019458;ENSRNOG00000019742;ENSRNOG00000020420;ENSRNOG00000023150;ENSRNOG00000023587;ENSRNOG00000029993;ENSRNOG00000031263;ENSRNOG00000034191;ENSRNOG00000049497;ENSRNOG00000050315;ENSRNOG00000050585;ENSRNOG00000050630;ENSRNOG00000052802;…	0.0017006	21	148	ENSRNOG00000005861;ENSRNOG00000006589;ENSRNOG00000008103;ENSRNOG00000009715;ENSRNOG00000013949;ENSRNOG00000017523;ENSRNOG00000019458;ENSRNOG00000019742;ENSRNOG00000020420;ENSRNOG00000022576;ENSRNOG00000023150;ENSRNOG00000023587;ENSRNOG00000029993;ENSRNOG00000034242;ENSRNOG00000050585;ENSRNOG00000052802;ENSRNOG00000056076;ENSRNOG00000056457;ENSRNOG00000056728;ENSRNOG00000057626;ENSRNOG00000058249	0.0100455
GO:0046677	response to antibiotic					60	364	ENSRNOG00000000053;ENSRNOG00000000571;ENSRNOG00000000604;ENSRNOG00000000967;ENSRNOG00000001926;ENSRNOG00000002115;ENSRNOG00000002636;ENSRNOG00000003977;ENSRNOG00000004107;ENSRNOG00000004959;ENSRNOG00000005195;ENSRNOG00000005418;ENSRNOG00000006589;ENSRNOG00000006675;ENSRNOG00000007235;ENSRNOG00000007964;ENSRNOG00000008012;ENSRNOG00000008140;ENSRNOG00000008364;ENSRNOG00000010558;ENSRNOG00000011157;…	7.68454e-06	48	364	ENSRNOG00000000053;ENSRNOG00000000158;ENSRNOG00000000604;ENSRNOG00000000967;ENSRNOG00000001738;ENSRNOG00000001926;ENSRNOG00000002292;ENSRNOG00000002636;ENSRNOG00000003977;ENSRNOG00000006067;ENSRNOG00000006589;ENSRNOG00000007235;ENSRNOG00000008012;ENSRNOG00000008364;ENSRNOG00000010558;ENSRNOG00000011157;ENSRNOG00000012123;ENSRNOG00000012458;ENSRNOG00000012772;ENSRNOG00000013954;ENSRNOG00000014117;…	8.2229e-05
GO:0046685	response to arsenic-containing substance					9	32	ENSRNOG00000000521;ENSRNOG00000006302;ENSRNOG00000007916;ENSRNOG00000010558;ENSRNOG00000014117;ENSRNOG00000015206;ENSRNOG00000020723;ENSRNOG00000032917;ENSRNOG00000046727	0.0132174	10	32	ENSRNOG00000000521;ENSRNOG00000006302;ENSRNOG00000010558;ENSRNOG00000014117;ENSRNOG00000015206;ENSRNOG00000020723;ENSRNOG00000029028;ENSRNOG00000032917;ENSRNOG00000034242;ENSRNOG00000046727	0.000690993
GO:0046686	response to cadmium ion					19	60	ENSRNOG00000002115;ENSRNOG00000004332;ENSRNOG00000006302;ENSRNOG00000008012;ENSRNOG00000008015;ENSRNOG00000008364;ENSRNOG00000012840;ENSRNOG00000014117;ENSRNOG00000015206;ENSRNOG00000016133;ENSRNOG00000017123;ENSRNOG00000018904;ENSRNOG00000018964;ENSRNOG00000023150;ENSRNOG00000025764;ENSRNOG00000026293;ENSRNOG00000031263;ENSRNOG00000038047;ENSRNOG00000043098	8.16722e-06	12	60	ENSRNOG00000006302;ENSRNOG00000008012;ENSRNOG00000008364;ENSRNOG00000014117;ENSRNOG00000015206;ENSRNOG00000016907;ENSRNOG00000018964;ENSRNOG00000022485;ENSRNOG00000023150;ENSRNOG00000025764;ENSRNOG00000028629;ENSRNOG00000043098	0.00763653
GO:0046700	heterocycle catabolic process					62	420	ENSRNOG00000000815;ENSRNOG00000002186;ENSRNOG00000002735;ENSRNOG00000002828;ENSRNOG00000003709;ENSRNOG00000003773;ENSRNOG00000003863;ENSRNOG00000004726;ENSRNOG00000006589;ENSRNOG00000006807;ENSRNOG00000008639;ENSRNOG00000009094;ENSRNOG00000009615;ENSRNOG00000009977;ENSRNOG00000009982;ENSRNOG00000010580;ENSRNOG00000011785;ENSRNOG00000011910;ENSRNOG00000012314;ENSRNOG00000013791;ENSRNOG00000013948;…	0.000168427	57	420	ENSRNOG00000000422;ENSRNOG00000002186;ENSRNOG00000002292;ENSRNOG00000002735;ENSRNOG00000004726;ENSRNOG00000005266;ENSRNOG00000006067;ENSRNOG00000006420;ENSRNOG00000006589;ENSRNOG00000007081;ENSRNOG00000007570;ENSRNOG00000008639;ENSRNOG00000009094;ENSRNOG00000009245;ENSRNOG00000009615;ENSRNOG00000010262;ENSRNOG00000010537;ENSRNOG00000010580;ENSRNOG00000010799;ENSRNOG00000011612;ENSRNOG00000011728;…	4.99977e-06
GO:0046822	regulation of nucleocytoplasmic transport					18	96	ENSRNOG00000001173;ENSRNOG00000001269;ENSRNOG00000002735;ENSRNOG00000005257;ENSRNOG00000007315;ENSRNOG00000010235;ENSRNOG00000010989;ENSRNOG00000012081;ENSRNOG00000018289;ENSRNOG00000018903;ENSRNOG00000019407;ENSRNOG00000019618;ENSRNOG00000020298;ENSRNOG00000031789;ENSRNOG00000038881;ENSRNOG00000054890;ENSRNOG00000058882;ENSRNOG00000058898	0.0123315	14	96	ENSRNOG00000001173;ENSRNOG00000001269;ENSRNOG00000002735;ENSRNOG00000005257;ENSRNOG00000006355;ENSRNOG00000010235;ENSRNOG00000015380;ENSRNOG00000018233;ENSRNOG00000019618;ENSRNOG00000020298;ENSRNOG00000031420;ENSRNOG00000031789;ENSRNOG00000058882;ENSRNOG00000058898	0.0420569
GO:0046890	regulation of lipid biosynthetic process					30	124	ENSRNOG00000001189;ENSRNOG00000002115;ENSRNOG00000002212;ENSRNOG00000002478;ENSRNOG00000003228;ENSRNOG00000004649;ENSRNOG00000005542;ENSRNOG00000006331;ENSRNOG00000008167;ENSRNOG00000008377;ENSRNOG00000009488;ENSRNOG00000009565;ENSRNOG00000009615;ENSRNOG00000010034;ENSRNOG00000012404;ENSRNOG00000012879;ENSRNOG00000012911;ENSRNOG00000014350;ENSRNOG00000016769;ENSRNOG00000018114;ENSRNOG00000018402;…	3.05582e-06	26	124	ENSRNOG00000002050;ENSRNOG00000002478;ENSRNOG00000003228;ENSRNOG00000005542;ENSRNOG00000008167;ENSRNOG00000008377;ENSRNOG00000009488;ENSRNOG00000009565;ENSRNOG00000009615;ENSRNOG00000009946;ENSRNOG00000012404;ENSRNOG00000012911;ENSRNOG00000013763;ENSRNOG00000016769;ENSRNOG00000018114;ENSRNOG00000019372;ENSRNOG00000019422;ENSRNOG00000020578;ENSRNOG00000020853;ENSRNOG00000025602;ENSRNOG00000027434;…	4.92608e-06
GO:0046907	intracellular transport					164	1318	ENSRNOG00000000164;ENSRNOG00000000314;ENSRNOG00000000411;ENSRNOG00000000520;ENSRNOG00000000521;ENSRNOG00000000557;ENSRNOG00000000796;ENSRNOG00000000841;ENSRNOG00000001083;ENSRNOG00000001173;ENSRNOG00000001269;ENSRNOG00000001285;ENSRNOG00000001415;ENSRNOG00000001420;ENSRNOG00000001436;ENSRNOG00000001709;ENSRNOG00000002039;ENSRNOG00000002115;ENSRNOG00000002225;ENSRNOG00000002251;ENSRNOG00000002301;…	1.83045e-06	135	1318	ENSRNOG00000000048;ENSRNOG00000000096;ENSRNOG00000000164;ENSRNOG00000000470;ENSRNOG00000000520;ENSRNOG00000000521;ENSRNOG00000000796;ENSRNOG00000001083;ENSRNOG00000001173;ENSRNOG00000001258;ENSRNOG00000001269;ENSRNOG00000001285;ENSRNOG00000001415;ENSRNOG00000001436;ENSRNOG00000002039;ENSRNOG00000002251;ENSRNOG00000002292;ENSRNOG00000002615;ENSRNOG00000002735;ENSRNOG00000003232;ENSRNOG00000003747;…	2.57485e-06
GO:0048193	Golgi vesicle transport					34	229	ENSRNOG00000001083;ENSRNOG00000002144;ENSRNOG00000002251;ENSRNOG00000002301;ENSRNOG00000002795;ENSRNOG00000004563;ENSRNOG00000005229;ENSRNOG00000005331;ENSRNOG00000007649;ENSRNOG00000007699;ENSRNOG00000008320;ENSRNOG00000008411;ENSRNOG00000010224;ENSRNOG00000010474;ENSRNOG00000010944;ENSRNOG00000011008;ENSRNOG00000012659;ENSRNOG00000012826;ENSRNOG00000014429;ENSRNOG00000014485;ENSRNOG00000014872;…	0.00961414	37	229	ENSRNOG00000000048;ENSRNOG00000000470;ENSRNOG00000001083;ENSRNOG00000001258;ENSRNOG00000002251;ENSRNOG00000004657;ENSRNOG00000005229;ENSRNOG00000005331;ENSRNOG00000005766;ENSRNOG00000006139;ENSRNOG00000006989;ENSRNOG00000007699;ENSRNOG00000007744;ENSRNOG00000008320;ENSRNOG00000008411;ENSRNOG00000010224;ENSRNOG00000010474;ENSRNOG00000010628;ENSRNOG00000010944;ENSRNOG00000011014;ENSRNOG00000012659;…	1.18823e-05
GO:0048194	Golgi vesicle budding					9	29	ENSRNOG00000002251;ENSRNOG00000004563;ENSRNOG00000005229;ENSRNOG00000005331;ENSRNOG00000008411;ENSRNOG00000014429;ENSRNOG00000014485;ENSRNOG00000014872;ENSRNOG00000019122	0.00693037	10	29	ENSRNOG00000002251;ENSRNOG00000004657;ENSRNOG00000005229;ENSRNOG00000005331;ENSRNOG00000005766;ENSRNOG00000008411;ENSRNOG00000010628;ENSRNOG00000014429;ENSRNOG00000014872;ENSRNOG00000019122	0.000286804
GO:0048518	positive regulation of biological process					478	5149	ENSRNOG00000000053;ENSRNOG00000000068;ENSRNOG00000000165;ENSRNOG00000000264;ENSRNOG00000000322;ENSRNOG00000000397;ENSRNOG00000000411;ENSRNOG00000000488;ENSRNOG00000000521;ENSRNOG00000000527;ENSRNOG00000000571;ENSRNOG00000000604;ENSRNOG00000000658;ENSRNOG00000000723;ENSRNOG00000000796;ENSRNOG00000000799;ENSRNOG00000000808;ENSRNOG00000000841;ENSRNOG00000000847;ENSRNOG00000000853;ENSRNOG00000000923;…	0.0116762	383	5149	ENSRNOG00000000053;ENSRNOG00000000068;ENSRNOG00000000096;ENSRNOG00000000165;ENSRNOG00000000264;ENSRNOG00000000397;ENSRNOG00000000422;ENSRNOG00000000521;ENSRNOG00000000527;ENSRNOG00000000604;ENSRNOG00000000658;ENSRNOG00000000796;ENSRNOG00000000799;ENSRNOG00000000967;ENSRNOG00000001007;ENSRNOG00000001030;ENSRNOG00000001142;ENSRNOG00000001239;ENSRNOG00000001269;ENSRNOG00000001314;ENSRNOG00000001647;…	0.00832542
GO:0048732	gland development					59	460	ENSRNOG00000000185;ENSRNOG00000000314;ENSRNOG00000000571;ENSRNOG00000000841;ENSRNOG00000000847;ENSRNOG00000000967;ENSRNOG00000001148;ENSRNOG00000001797;ENSRNOG00000001926;ENSRNOG00000002693;ENSRNOG00000002783;ENSRNOG00000003232;ENSRNOG00000003253;ENSRNOG00000003515;ENSRNOG00000004332;ENSRNOG00000004725;ENSRNOG00000005082;ENSRNOG00000005195;ENSRNOG00000005276;ENSRNOG00000005513;ENSRNOG00000006338;…	0.00784209	48	460	ENSRNOG00000000158;ENSRNOG00000000967;ENSRNOG00000001797;ENSRNOG00000001926;ENSRNOG00000002292;ENSRNOG00000002783;ENSRNOG00000003232;ENSRNOG00000004281;ENSRNOG00000004294;ENSRNOG00000004725;ENSRNOG00000004741;ENSRNOG00000005082;ENSRNOG00000005276;ENSRNOG00000005513;ENSRNOG00000007081;ENSRNOG00000007237;ENSRNOG00000007395;ENSRNOG00000008012;ENSRNOG00000008095;ENSRNOG00000008837;ENSRNOG00000009446;…	0.0121707
GO:0050790	regulation of catalytic activity					195	1848	ENSRNOG00000000068;ENSRNOG00000000165;ENSRNOG00000000411;ENSRNOG00000000467;ENSRNOG00000000521;ENSRNOG00000000527;ENSRNOG00000000571;ENSRNOG00000000658;ENSRNOG00000000796;ENSRNOG00000000847;ENSRNOG00000000902;ENSRNOG00000001142;ENSRNOG00000001420;ENSRNOG00000001436;ENSRNOG00000001719;ENSRNOG00000001806;ENSRNOG00000001979;ENSRNOG00000002039;ENSRNOG00000002115;ENSRNOG00000002125;ENSRNOG00000002225;…	0.00276358	157	1848	ENSRNOG00000000068;ENSRNOG00000000165;ENSRNOG00000000521;ENSRNOG00000000527;ENSRNOG00000000658;ENSRNOG00000000796;ENSRNOG00000000902;ENSRNOG00000001142;ENSRNOG00000001404;ENSRNOG00000001436;ENSRNOG00000001979;ENSRNOG00000002039;ENSRNOG00000002125;ENSRNOG00000002292;ENSRNOG00000002642;ENSRNOG00000002735;ENSRNOG00000002783;ENSRNOG00000003177;ENSRNOG00000003228;ENSRNOG00000003232;ENSRNOG00000003256;…	0.00386715
GO:0050818	regulation of coagulation					13	68	ENSRNOG00000002278;ENSRNOG00000002636;ENSRNOG00000002783;ENSRNOG00000002794;ENSRNOG00000007457;ENSRNOG00000010362;ENSRNOG00000013133;ENSRNOG00000014453;ENSRNOG00000015139;ENSRNOG00000015461;ENSRNOG00000017223;ENSRNOG00000020578;ENSRNOG00000030387	0.0411447	12	68	ENSRNOG00000002278;ENSRNOG00000002636;ENSRNOG00000002783;ENSRNOG00000002794;ENSRNOG00000007457;ENSRNOG00000013133;ENSRNOG00000015139;ENSRNOG00000017223;ENSRNOG00000020578;ENSRNOG00000024848;ENSRNOG00000025074;ENSRNOG00000048723	0.0190605
GO:0050821	protein stabilization					30	135	ENSRNOG00000000164;ENSRNOG00000000236;ENSRNOG00000000923;ENSRNOG00000002878;ENSRNOG00000003500;ENSRNOG00000004107;ENSRNOG00000004793;ENSRNOG00000006663;ENSRNOG00000012594;ENSRNOG00000012999;ENSRNOG00000015385;ENSRNOG00000015630;ENSRNOG00000015703;ENSRNOG00000016460;ENSRNOG00000018289;ENSRNOG00000018903;ENSRNOG00000019090;ENSRNOG00000019122;ENSRNOG00000019423;ENSRNOG00000020298;ENSRNOG00000020723;…	1.85606e-05	18	135	ENSRNOG00000000164;ENSRNOG00000002878;ENSRNOG00000003261;ENSRNOG00000006663;ENSRNOG00000008551;ENSRNOG00000012594;ENSRNOG00000012999;ENSRNOG00000016460;ENSRNOG00000018413;ENSRNOG00000019090;ENSRNOG00000019122;ENSRNOG00000019423;ENSRNOG00000020298;ENSRNOG00000020723;ENSRNOG00000020950;ENSRNOG00000021317;ENSRNOG00000049531;ENSRNOG00000059714	0.0349295
GO:0050994	regulation of lipid catabolic process					15	49	ENSRNOG00000000658;ENSRNOG00000003500;ENSRNOG00000004649;ENSRNOG00000005618;ENSRNOG00000006675;ENSRNOG00000009615;ENSRNOG00000014254;ENSRNOG00000014522;ENSRNOG00000014597;ENSRNOG00000018402;ENSRNOG00000020990;ENSRNOG00000024705;ENSRNOG00000025602;ENSRNOG00000046889;ENSRNOG00000047503	0.000193503	9	49	ENSRNOG00000000658;ENSRNOG00000009615;ENSRNOG00000009946;ENSRNOG00000014522;ENSRNOG00000018677;ENSRNOG00000025602;ENSRNOG00000028629;ENSRNOG00000046889;ENSRNOG00000047503	0.0451371
GO:0051055	negative regulation of lipid biosynthetic process					10	35	ENSRNOG00000001189;ENSRNOG00000002115;ENSRNOG00000002478;ENSRNOG00000008377;ENSRNOG00000009488;ENSRNOG00000012911;ENSRNOG00000018114;ENSRNOG00000020578;ENSRNOG00000030019;ENSRNOG00000047503	0.00696985	8	35	ENSRNOG00000002478;ENSRNOG00000008377;ENSRNOG00000009488;ENSRNOG00000012911;ENSRNOG00000013763;ENSRNOG00000018114;ENSRNOG00000020578;ENSRNOG00000047503	0.0215014
GO:0051169	nuclear transport					39	261	ENSRNOG00000000520;ENSRNOG00000000521;ENSRNOG00000000796;ENSRNOG00000000841;ENSRNOG00000001173;ENSRNOG00000001269;ENSRNOG00000002735;ENSRNOG00000003497;ENSRNOG00000004700;ENSRNOG00000005257;ENSRNOG00000006913;ENSRNOG00000007088;ENSRNOG00000007315;ENSRNOG00000007665;ENSRNOG00000010235;ENSRNOG00000010420;ENSRNOG00000010989;ENSRNOG00000012081;ENSRNOG00000012999;ENSRNOG00000014448;ENSRNOG00000016722;…	0.00420345	32	261	ENSRNOG00000000520;ENSRNOG00000000521;ENSRNOG00000000796;ENSRNOG00000001173;ENSRNOG00000001269;ENSRNOG00000002292;ENSRNOG00000002735;ENSRNOG00000004700;ENSRNOG00000005257;ENSRNOG00000006355;ENSRNOG00000007088;ENSRNOG00000007665;ENSRNOG00000009882;ENSRNOG00000010235;ENSRNOG00000012999;ENSRNOG00000014448;ENSRNOG00000015380;ENSRNOG00000018233;ENSRNOG00000019069;ENSRNOG00000019618;ENSRNOG00000019638;…	0.00727337
GO:0051172	negative regulation of nitrogen compound metabolic process					200	2010	ENSRNOG00000000322;ENSRNOG00000000397;ENSRNOG00000000467;ENSRNOG00000000488;ENSRNOG00000000521;ENSRNOG00000000604;ENSRNOG00000001139;ENSRNOG00000001189;ENSRNOG00000001524;ENSRNOG00000001582;ENSRNOG00000001585;ENSRNOG00000001806;ENSRNOG00000001889;ENSRNOG00000002389;ENSRNOG00000002393;ENSRNOG00000002618;ENSRNOG00000002735;ENSRNOG00000002755;ENSRNOG00000002783;ENSRNOG00000002828;ENSRNOG00000003048;…	0.0284489	159	2010	ENSRNOG00000000397;ENSRNOG00000000521;ENSRNOG00000000604;ENSRNOG00000001050;ENSRNOG00000001647;ENSRNOG00000001738;ENSRNOG00000002292;ENSRNOG00000002389;ENSRNOG00000002393;ENSRNOG00000002618;ENSRNOG00000002735;ENSRNOG00000002783;ENSRNOG00000002946;ENSRNOG00000003147;ENSRNOG00000003232;ENSRNOG00000003302;ENSRNOG00000003977;ENSRNOG00000004100;ENSRNOG00000004294;ENSRNOG00000004725;ENSRNOG00000004726;…	0.0425894
GO:0051234	establishment of localization					392	4119	ENSRNOG00000000053;ENSRNOG00000000064;ENSRNOG00000000150;ENSRNOG00000000164;ENSRNOG00000000186;ENSRNOG00000000219;ENSRNOG00000000314;ENSRNOG00000000322;ENSRNOG00000000411;ENSRNOG00000000520;ENSRNOG00000000521;ENSRNOG00000000557;ENSRNOG00000000571;ENSRNOG00000000796;ENSRNOG00000000841;ENSRNOG00000000853;ENSRNOG00000000923;ENSRNOG00000000967;ENSRNOG00000001083;ENSRNOG00000001148;ENSRNOG00000001173;…	0.00767609	325	4119	ENSRNOG00000000048;ENSRNOG00000000053;ENSRNOG00000000064;ENSRNOG00000000096;ENSRNOG00000000150;ENSRNOG00000000158;ENSRNOG00000000164;ENSRNOG00000000186;ENSRNOG00000000470;ENSRNOG00000000512;ENSRNOG00000000520;ENSRNOG00000000521;ENSRNOG00000000588;ENSRNOG00000000665;ENSRNOG00000000796;ENSRNOG00000000967;ENSRNOG00000001050;ENSRNOG00000001052;ENSRNOG00000001083;ENSRNOG00000001173;ENSRNOG00000001258;…	0.000548696
GO:0051246	regulation of protein metabolic process					253	2355	ENSRNOG00000000068;ENSRNOG00000000150;ENSRNOG00000000322;ENSRNOG00000000521;ENSRNOG00000000527;ENSRNOG00000000571;ENSRNOG00000000604;ENSRNOG00000000799;ENSRNOG00000000841;ENSRNOG00000000847;ENSRNOG00000000853;ENSRNOG00000001420;ENSRNOG00000001598;ENSRNOG00000001602;ENSRNOG00000001719;ENSRNOG00000001806;ENSRNOG00000001829;ENSRNOG00000001979;ENSRNOG00000002115;ENSRNOG00000002125;ENSRNOG00000002278;…	9.83701e-05	207	2355	ENSRNOG00000000068;ENSRNOG00000000150;ENSRNOG00000000521;ENSRNOG00000000527;ENSRNOG00000000604;ENSRNOG00000000799;ENSRNOG00000001050;ENSRNOG00000001738;ENSRNOG00000001979;ENSRNOG00000002125;ENSRNOG00000002278;ENSRNOG00000002292;ENSRNOG00000002393;ENSRNOG00000002618;ENSRNOG00000002735;ENSRNOG00000002783;ENSRNOG00000002946;ENSRNOG00000003147;ENSRNOG00000003232;ENSRNOG00000003256;ENSRNOG00000003302;…	5.45452e-05
GO:0051248	negative regulation of protein metabolic process					124	955	ENSRNOG00000000322;ENSRNOG00000000521;ENSRNOG00000000604;ENSRNOG00000001806;ENSRNOG00000002393;ENSRNOG00000002618;ENSRNOG00000002755;ENSRNOG00000002783;ENSRNOG00000002828;ENSRNOG00000003048;ENSRNOG00000003232;ENSRNOG00000003745;ENSRNOG00000003977;ENSRNOG00000004107;ENSRNOG00000004332;ENSRNOG00000004637;ENSRNOG00000004649;ENSRNOG00000005195;ENSRNOG00000005276;ENSRNOG00000005428;ENSRNOG00000005615;…	8.67801e-06	96	955	ENSRNOG00000000521;ENSRNOG00000000604;ENSRNOG00000001050;ENSRNOG00000001738;ENSRNOG00000002292;ENSRNOG00000002393;ENSRNOG00000002618;ENSRNOG00000002783;ENSRNOG00000002946;ENSRNOG00000003232;ENSRNOG00000003302;ENSRNOG00000003977;ENSRNOG00000004100;ENSRNOG00000005275;ENSRNOG00000005276;ENSRNOG00000005333;ENSRNOG00000005615;ENSRNOG00000006302;ENSRNOG00000006326;ENSRNOG00000006622;ENSRNOG00000006709;…	0.00031128
GO:0051348	negative regulation of transferase activity					31	226	ENSRNOG00000000068;ENSRNOG00000000521;ENSRNOG00000003977;ENSRNOG00000004107;ENSRNOG00000004637;ENSRNOG00000004649;ENSRNOG00000005615;ENSRNOG00000006338;ENSRNOG00000007029;ENSRNOG00000010235;ENSRNOG00000010352;ENSRNOG00000014294;ENSRNOG00000014779;ENSRNOG00000016322;ENSRNOG00000016723;ENSRNOG00000018289;ENSRNOG00000019423;ENSRNOG00000020182;ENSRNOG00000020578;ENSRNOG00000020723;ENSRNOG00000023546;…	0.0425083	28	226	ENSRNOG00000000068;ENSRNOG00000000521;ENSRNOG00000003977;ENSRNOG00000004100;ENSRNOG00000005615;ENSRNOG00000007029;ENSRNOG00000008551;ENSRNOG00000010235;ENSRNOG00000011503;ENSRNOG00000014294;ENSRNOG00000016122;ENSRNOG00000016322;ENSRNOG00000018237;ENSRNOG00000019423;ENSRNOG00000020182;ENSRNOG00000020578;ENSRNOG00000020723;ENSRNOG00000023546;ENSRNOG00000026643;ENSRNOG00000027860;ENSRNOG00000028629;…	0.0121707
GO:0051603	proteolysis involved in cellular protein catabolic process					79	631	ENSRNOG00000001598;ENSRNOG00000001602;ENSRNOG00000001719;ENSRNOG00000001829;ENSRNOG00000002358;ENSRNOG00000004006;ENSRNOG00000004107;ENSRNOG00000004130;ENSRNOG00000004464;ENSRNOG00000004637;ENSRNOG00000005257;ENSRNOG00000005310;ENSRNOG00000006143;ENSRNOG00000006302;ENSRNOG00000006328;ENSRNOG00000006663;ENSRNOG00000006751;ENSRNOG00000007114;ENSRNOG00000007916;ENSRNOG00000008214;ENSRNOG00000008604;…	0.00257801	68	631	ENSRNOG00000000438;ENSRNOG00000001293;ENSRNOG00000002341;ENSRNOG00000002358;ENSRNOG00000003261;ENSRNOG00000004100;ENSRNOG00000004464;ENSRNOG00000005257;ENSRNOG00000005310;ENSRNOG00000006302;ENSRNOG00000006345;ENSRNOG00000006663;ENSRNOG00000007089;ENSRNOG00000008214;ENSRNOG00000008551;ENSRNOG00000010725;ENSRNOG00000010727;ENSRNOG00000011414;ENSRNOG00000012026;ENSRNOG00000012862;ENSRNOG00000012911;…	0.000693963
GO:0051641	cellular localization					246	2250	ENSRNOG00000000068;ENSRNOG00000000164;ENSRNOG00000000264;ENSRNOG00000000314;ENSRNOG00000000322;ENSRNOG00000000411;ENSRNOG00000000520;ENSRNOG00000000521;ENSRNOG00000000557;ENSRNOG00000000796;ENSRNOG00000000841;ENSRNOG00000000923;ENSRNOG00000001083;ENSRNOG00000001173;ENSRNOG00000001269;ENSRNOG00000001285;ENSRNOG00000001415;ENSRNOG00000001420;ENSRNOG00000001429;ENSRNOG00000001436;ENSRNOG00000001709;…	3.85637e-05	205	2250	ENSRNOG00000000048;ENSRNOG00000000068;ENSRNOG00000000096;ENSRNOG00000000164;ENSRNOG00000000264;ENSRNOG00000000470;ENSRNOG00000000520;ENSRNOG00000000521;ENSRNOG00000000796;ENSRNOG00000001083;ENSRNOG00000001173;ENSRNOG00000001258;ENSRNOG00000001269;ENSRNOG00000001285;ENSRNOG00000001293;ENSRNOG00000001415;ENSRNOG00000001436;ENSRNOG00000001706;ENSRNOG00000001825;ENSRNOG00000002039;ENSRNOG00000002251;…	6.09538e-06
GO:0051649	establishment of localization in cell					186	1645	ENSRNOG00000000164;ENSRNOG00000000314;ENSRNOG00000000322;ENSRNOG00000000411;ENSRNOG00000000520;ENSRNOG00000000521;ENSRNOG00000000557;ENSRNOG00000000796;ENSRNOG00000000841;ENSRNOG00000001083;ENSRNOG00000001173;ENSRNOG00000001269;ENSRNOG00000001285;ENSRNOG00000001415;ENSRNOG00000001420;ENSRNOG00000001436;ENSRNOG00000001709;ENSRNOG00000002039;ENSRNOG00000002115;ENSRNOG00000002225;ENSRNOG00000002251;…	0.0001185	155	1645	ENSRNOG00000000048;ENSRNOG00000000096;ENSRNOG00000000164;ENSRNOG00000000470;ENSRNOG00000000520;ENSRNOG00000000521;ENSRNOG00000000796;ENSRNOG00000001083;ENSRNOG00000001173;ENSRNOG00000001258;ENSRNOG00000001269;ENSRNOG00000001285;ENSRNOG00000001415;ENSRNOG00000001436;ENSRNOG00000002039;ENSRNOG00000002251;ENSRNOG00000002292;ENSRNOG00000002615;ENSRNOG00000002735;ENSRNOG00000003232;ENSRNOG00000003747;…	3.30502e-05
GO:0055076	transition metal ion homeostasis					19	114	ENSRNOG00000002115;ENSRNOG00000003773;ENSRNOG00000004662;ENSRNOG00000006997;ENSRNOG00000009832;ENSRNOG00000013271;ENSRNOG00000014117;ENSRNOG00000016967;ENSRNOG00000017123;ENSRNOG00000017235;ENSRNOG00000018322;ENSRNOG00000018977;ENSRNOG00000019768;ENSRNOG00000021200;ENSRNOG00000025764;ENSRNOG00000038047;ENSRNOG00000043098;ENSRNOG00000050052;ENSRNOG00000057855	0.0315354	17	114	ENSRNOG00000001050;ENSRNOG00000004662;ENSRNOG00000005849;ENSRNOG00000009832;ENSRNOG00000011913;ENSRNOG00000014117;ENSRNOG00000014879;ENSRNOG00000016967;ENSRNOG00000017235;ENSRNOG00000018322;ENSRNOG00000021200;ENSRNOG00000021318;ENSRNOG00000025764;ENSRNOG00000031420;ENSRNOG00000043098;ENSRNOG00000050052;ENSRNOG00000054352	0.016269
GO:0055088	lipid homeostasis					22	110	ENSRNOG00000000411;ENSRNOG00000003500;ENSRNOG00000003679;ENSRNOG00000004563;ENSRNOG00000004755;ENSRNOG00000005542;ENSRNOG00000008012;ENSRNOG00000009488;ENSRNOG00000012879;ENSRNOG00000013794;ENSRNOG00000018402;ENSRNOG00000018405;ENSRNOG00000019573;ENSRNOG00000022268;ENSRNOG00000022296;ENSRNOG00000030726;ENSRNOG00000034013;ENSRNOG00000043503;ENSRNOG00000047503;ENSRNOG00000051171;ENSRNOG00000060338;…	0.00186565	16	110	ENSRNOG00000005542;ENSRNOG00000007545;ENSRNOG00000008012;ENSRNOG00000009488;ENSRNOG00000009946;ENSRNOG00000013794;ENSRNOG00000019812;ENSRNOG00000020016;ENSRNOG00000022268;ENSRNOG00000022657;ENSRNOG00000027434;ENSRNOG00000034013;ENSRNOG00000043503;ENSRNOG00000047503;ENSRNOG00000051171;ENSRNOG00000053769	0.026036
GO:0060548	negative regulation of cell death					112	833	ENSRNOG00000000322;ENSRNOG00000000521;ENSRNOG00000000571;ENSRNOG00000000827;ENSRNOG00000000853;ENSRNOG00000001829;ENSRNOG00000002115;ENSRNOG00000002572;ENSRNOG00000002618;ENSRNOG00000002642;ENSRNOG00000002671;ENSRNOG00000002911;ENSRNOG00000003256;ENSRNOG00000003497;ENSRNOG00000003689;ENSRNOG00000003977;ENSRNOG00000004332;ENSRNOG00000004364;ENSRNOG00000004637;ENSRNOG00000004649;ENSRNOG00000005195;…	6.19619e-06	75	833	ENSRNOG00000000521;ENSRNOG00000000827;ENSRNOG00000002572;ENSRNOG00000002618;ENSRNOG00000002642;ENSRNOG00000002946;ENSRNOG00000003256;ENSRNOG00000003977;ENSRNOG00000004294;ENSRNOG00000004964;ENSRNOG00000005276;ENSRNOG00000005796;ENSRNOG00000005882;ENSRNOG00000006302;ENSRNOG00000006380;ENSRNOG00000006787;ENSRNOG00000007029;ENSRNOG00000007089;ENSRNOG00000007139;ENSRNOG00000007545;ENSRNOG00000008012;…	0.0291216
GO:0060620	regulation of cholesterol import					4	5	ENSRNOG00000003500;ENSRNOG00000025053;ENSRNOG00000047503;ENSRNOG00000053306	0.00436168	3	5	ENSRNOG00000020016;ENSRNOG00000025053;ENSRNOG00000047503	0.0331028
GO:0061077	chaperone-mediated protein folding					12	45	ENSRNOG00000000902;ENSRNOG00000009920;ENSRNOG00000012357;ENSRNOG00000013011;ENSRNOG00000016460;ENSRNOG00000017781;ENSRNOG00000021317;ENSRNOG00000021824;ENSRNOG00000023546;ENSRNOG00000026643;ENSRNOG00000050647;ENSRNOG00000060107	0.00421746	10	45	ENSRNOG00000000902;ENSRNOG00000016460;ENSRNOG00000017781;ENSRNOG00000019506;ENSRNOG00000019891;ENSRNOG00000021317;ENSRNOG00000021824;ENSRNOG00000023546;ENSRNOG00000026643;ENSRNOG00000034093	0.00918962
GO:0061136	regulation of proteasomal protein catabolic process					26	157	ENSRNOG00000001829;ENSRNOG00000005257;ENSRNOG00000006302;ENSRNOG00000009887;ENSRNOG00000011414;ENSRNOG00000011951;ENSRNOG00000012026;ENSRNOG00000015206;ENSRNOG00000016456;ENSRNOG00000016460;ENSRNOG00000018289;ENSRNOG00000018698;ENSRNOG00000018796;ENSRNOG00000019282;ENSRNOG00000019299;ENSRNOG00000019423;ENSRNOG00000019666;ENSRNOG00000019834;ENSRNOG00000025496;ENSRNOG00000026260;ENSRNOG00000032917;…	0.0083239	22	157	ENSRNOG00000004100;ENSRNOG00000005257;ENSRNOG00000006302;ENSRNOG00000011414;ENSRNOG00000012026;ENSRNOG00000015206;ENSRNOG00000016456;ENSRNOG00000016460;ENSRNOG00000017106;ENSRNOG00000018698;ENSRNOG00000019282;ENSRNOG00000019299;ENSRNOG00000019423;ENSRNOG00000019506;ENSRNOG00000019834;ENSRNOG00000019891;ENSRNOG00000028629;ENSRNOG00000032917;ENSRNOG00000034242;ENSRNOG00000045637;ENSRNOG00000049531;…	0.00918962
GO:0061635	regulation of protein complex stability					4	9	ENSRNOG00000003147;ENSRNOG00000004793;ENSRNOG00000019834;ENSRNOG00000059714	0.0483613	4	9	ENSRNOG00000003147;ENSRNOG00000019834;ENSRNOG00000022482;ENSRNOG00000059714	0.0242626
GO:0061684	chaperone-mediated autophagy					6	15	ENSRNOG00000000164;ENSRNOG00000009920;ENSRNOG00000015857;ENSRNOG00000019834;ENSRNOG00000020298;ENSRNOG00000059714	0.0128424	5	15	ENSRNOG00000000164;ENSRNOG00000019834;ENSRNOG00000020298;ENSRNOG00000034093;ENSRNOG00000059714	0.0272257
GO:0061919	process utilizing autophagic mechanism					49	344	ENSRNOG00000000164;ENSRNOG00000000322;ENSRNOG00000001420;ENSRNOG00000003147;ENSRNOG00000003649;ENSRNOG00000004637;ENSRNOG00000005528;ENSRNOG00000006375;ENSRNOG00000007916;ENSRNOG00000007964;ENSRNOG00000008604;ENSRNOG00000009252;ENSRNOG00000009615;ENSRNOG00000009920;ENSRNOG00000011951;ENSRNOG00000012247;ENSRNOG00000012748;ENSRNOG00000014117;ENSRNOG00000015385;ENSRNOG00000015857;ENSRNOG00000016509;…	0.00257801	37	344	ENSRNOG00000000164;ENSRNOG00000000438;ENSRNOG00000001738;ENSRNOG00000003147;ENSRNOG00000003302;ENSRNOG00000006375;ENSRNOG00000007529;ENSRNOG00000008891;ENSRNOG00000009252;ENSRNOG00000009615;ENSRNOG00000012247;ENSRNOG00000013387;ENSRNOG00000014117;ENSRNOG00000016509;ENSRNOG00000016984;ENSRNOG00000017941;ENSRNOG00000018698;ENSRNOG00000019282;ENSRNOG00000019710;ENSRNOG00000019742;ENSRNOG00000019834;…	0.0234573
GO:0062012	regulation of small molecule metabolic process					54	268	ENSRNOG00000000165;ENSRNOG00000000658;ENSRNOG00000000796;ENSRNOG00000001189;ENSRNOG00000001889;ENSRNOG00000002115;ENSRNOG00000002478;ENSRNOG00000003228;ENSRNOG00000003712;ENSRNOG00000004172;ENSRNOG00000004649;ENSRNOG00000005542;ENSRNOG00000006331;ENSRNOG00000006589;ENSRNOG00000006622;ENSRNOG00000006675;ENSRNOG00000008047;ENSRNOG00000008377;ENSRNOG00000009063;ENSRNOG00000009488;ENSRNOG00000009565;…	4.47681e-08	42	268	ENSRNOG00000000165;ENSRNOG00000000658;ENSRNOG00000000796;ENSRNOG00000002478;ENSRNOG00000003228;ENSRNOG00000003302;ENSRNOG00000005542;ENSRNOG00000005861;ENSRNOG00000006589;ENSRNOG00000006622;ENSRNOG00000008047;ENSRNOG00000008377;ENSRNOG00000009488;ENSRNOG00000009565;ENSRNOG00000009615;ENSRNOG00000009715;ENSRNOG00000009845;ENSRNOG00000009946;ENSRNOG00000010558;ENSRNOG00000012911;ENSRNOG00000013763;…	5.03337e-06
GO:0062014	negative regulation of small molecule metabolic process					16	72	ENSRNOG00000000658;ENSRNOG00000001189;ENSRNOG00000002115;ENSRNOG00000002478;ENSRNOG00000006622;ENSRNOG00000008377;ENSRNOG00000009063;ENSRNOG00000009488;ENSRNOG00000010558;ENSRNOG00000012911;ENSRNOG00000018114;ENSRNOG00000019742;ENSRNOG00000020578;ENSRNOG00000046889;ENSRNOG00000047503;ENSRNOG00000061527	0.00420345	15	72	ENSRNOG00000000658;ENSRNOG00000002478;ENSRNOG00000003302;ENSRNOG00000006622;ENSRNOG00000008377;ENSRNOG00000009488;ENSRNOG00000010558;ENSRNOG00000012911;ENSRNOG00000013763;ENSRNOG00000018114;ENSRNOG00000019742;ENSRNOG00000020578;ENSRNOG00000028629;ENSRNOG00000046889;ENSRNOG00000047503	0.00131611
GO:0065008	regulation of biological quality					344	3308	ENSRNOG00000000053;ENSRNOG00000000164;ENSRNOG00000000236;ENSRNOG00000000264;ENSRNOG00000000322;ENSRNOG00000000411;ENSRNOG00000000658;ENSRNOG00000000853;ENSRNOG00000000867;ENSRNOG00000000923;ENSRNOG00000000967;ENSRNOG00000001007;ENSRNOG00000001083;ENSRNOG00000001142;ENSRNOG00000001148;ENSRNOG00000001173;ENSRNOG00000001285;ENSRNOG00000001420;ENSRNOG00000001436;ENSRNOG00000001585;ENSRNOG00000001709;…	2.58231e-05	276	3308	ENSRNOG00000000053;ENSRNOG00000000158;ENSRNOG00000000164;ENSRNOG00000000264;ENSRNOG00000000422;ENSRNOG00000000438;ENSRNOG00000000582;ENSRNOG00000000588;ENSRNOG00000000658;ENSRNOG00000000967;ENSRNOG00000001007;ENSRNOG00000001050;ENSRNOG00000001083;ENSRNOG00000001142;ENSRNOG00000001173;ENSRNOG00000001285;ENSRNOG00000001293;ENSRNOG00000001436;ENSRNOG00000001706;ENSRNOG00000001738;ENSRNOG00000001782;…	5.38113e-05
GO:0070482	response to oxygen levels					50	335	ENSRNOG00000000053;ENSRNOG00000000521;ENSRNOG00000000604;ENSRNOG00000001420;ENSRNOG00000001582;ENSRNOG00000002636;ENSRNOG00000005195;ENSRNOG00000005614;ENSRNOG00000006589;ENSRNOG00000006675;ENSRNOG00000008012;ENSRNOG00000008364;ENSRNOG00000008553;ENSRNOG00000009568;ENSRNOG00000009615;ENSRNOG00000010944;ENSRNOG00000012473;ENSRNOG00000012582;ENSRNOG00000012999;ENSRNOG00000013271;ENSRNOG00000013766;…	0.000798306	45	335	ENSRNOG00000000053;ENSRNOG00000000521;ENSRNOG00000000604;ENSRNOG00000002636;ENSRNOG00000006067;ENSRNOG00000006589;ENSRNOG00000007545;ENSRNOG00000007763;ENSRNOG00000008012;ENSRNOG00000008364;ENSRNOG00000009568;ENSRNOG00000009615;ENSRNOG00000010944;ENSRNOG00000012999;ENSRNOG00000013180;ENSRNOG00000013766;ENSRNOG00000014117;ENSRNOG00000014525;ENSRNOG00000015206;ENSRNOG00000016166;ENSRNOG00000017235;…	0.000101039
GO:0070542	response to fatty acid					16	88	ENSRNOG00000000967;ENSRNOG00000001926;ENSRNOG00000002478;ENSRNOG00000002671;ENSRNOG00000002693;ENSRNOG00000005542;ENSRNOG00000006859;ENSRNOG00000008364;ENSRNOG00000009565;ENSRNOG00000012879;ENSRNOG00000013552;ENSRNOG00000014254;ENSRNOG00000015206;ENSRNOG00000025602;ENSRNOG00000034013;ENSRNOG00000034290	0.0284489	17	88	ENSRNOG00000000967;ENSRNOG00000001926;ENSRNOG00000002478;ENSRNOG00000005542;ENSRNOG00000006859;ENSRNOG00000008364;ENSRNOG00000008837;ENSRNOG00000009565;ENSRNOG00000009946;ENSRNOG00000010633;ENSRNOG00000013552;ENSRNOG00000013704;ENSRNOG00000015206;ENSRNOG00000016907;ENSRNOG00000025602;ENSRNOG00000028629;ENSRNOG00000034013	0.00118124
GO:0070727	cellular macromolecule localization					185	1470	ENSRNOG00000000068;ENSRNOG00000000164;ENSRNOG00000000314;ENSRNOG00000000520;ENSRNOG00000000521;ENSRNOG00000000557;ENSRNOG00000000796;ENSRNOG00000000841;ENSRNOG00000000923;ENSRNOG00000001083;ENSRNOG00000001173;ENSRNOG00000001415;ENSRNOG00000001420;ENSRNOG00000001429;ENSRNOG00000001436;ENSRNOG00000001709;ENSRNOG00000002039;ENSRNOG00000002144;ENSRNOG00000002225;ENSRNOG00000002251;ENSRNOG00000002301;…	1.18221e-07	154	1470	ENSRNOG00000000048;ENSRNOG00000000068;ENSRNOG00000000096;ENSRNOG00000000164;ENSRNOG00000000520;ENSRNOG00000000521;ENSRNOG00000000796;ENSRNOG00000001083;ENSRNOG00000001173;ENSRNOG00000001258;ENSRNOG00000001293;ENSRNOG00000001415;ENSRNOG00000001436;ENSRNOG00000001706;ENSRNOG00000001825;ENSRNOG00000002039;ENSRNOG00000002251;ENSRNOG00000002615;ENSRNOG00000002735;ENSRNOG00000003147;ENSRNOG00000003232;…	6.82485e-08
GO:0070887	cellular response to chemical stimulus					292	2532	ENSRNOG00000000053;ENSRNOG00000000411;ENSRNOG00000000571;ENSRNOG00000000604;ENSRNOG00000000847;ENSRNOG00000000853;ENSRNOG00000000967;ENSRNOG00000000989;ENSRNOG00000001007;ENSRNOG00000001148;ENSRNOG00000001285;ENSRNOG00000001420;ENSRNOG00000001436;ENSRNOG00000001582;ENSRNOG00000001585;ENSRNOG00000001797;ENSRNOG00000001926;ENSRNOG00000001964;ENSRNOG00000002115;ENSRNOG00000002393;ENSRNOG00000002520;…	2.32888e-08	243	2532	ENSRNOG00000000053;ENSRNOG00000000158;ENSRNOG00000000438;ENSRNOG00000000604;ENSRNOG00000000967;ENSRNOG00000001007;ENSRNOG00000001285;ENSRNOG00000001314;ENSRNOG00000001436;ENSRNOG00000001797;ENSRNOG00000001890;ENSRNOG00000001926;ENSRNOG00000001967;ENSRNOG00000002050;ENSRNOG00000002292;ENSRNOG00000002341;ENSRNOG00000002393;ENSRNOG00000002520;ENSRNOG00000002572;ENSRNOG00000002642;ENSRNOG00000002735;…	3.19186e-09
GO:0071310	cellular response to organic substance					227	2035	ENSRNOG00000000053;ENSRNOG00000000411;ENSRNOG00000000571;ENSRNOG00000000604;ENSRNOG00000000847;ENSRNOG00000000853;ENSRNOG00000000967;ENSRNOG00000000989;ENSRNOG00000001007;ENSRNOG00000001148;ENSRNOG00000001420;ENSRNOG00000001436;ENSRNOG00000001585;ENSRNOG00000001926;ENSRNOG00000001964;ENSRNOG00000002115;ENSRNOG00000002393;ENSRNOG00000002520;ENSRNOG00000002572;ENSRNOG00000002642;ENSRNOG00000002671;…	2.58231e-05	189	2035	ENSRNOG00000000053;ENSRNOG00000000438;ENSRNOG00000000604;ENSRNOG00000000967;ENSRNOG00000001007;ENSRNOG00000001314;ENSRNOG00000001436;ENSRNOG00000001926;ENSRNOG00000002050;ENSRNOG00000002292;ENSRNOG00000002341;ENSRNOG00000002393;ENSRNOG00000002520;ENSRNOG00000002572;ENSRNOG00000002642;ENSRNOG00000002735;ENSRNOG00000002946;ENSRNOG00000003261;ENSRNOG00000003302;ENSRNOG00000003977;ENSRNOG00000004072;…	5.79871e-06
GO:0071375	cellular response to peptide hormone stimulus					41	260	ENSRNOG00000001007;ENSRNOG00000001436;ENSRNOG00000002393;ENSRNOG00000004172;ENSRNOG00000004377;ENSRNOG00000004649;ENSRNOG00000005513;ENSRNOG00000006302;ENSRNOG00000006859;ENSRNOG00000007607;ENSRNOG00000007916;ENSRNOG00000008377;ENSRNOG00000008652;ENSRNOG00000009565;ENSRNOG00000010748;ENSRNOG00000012473;ENSRNOG00000012582;ENSRNOG00000014597;ENSRNOG00000015654;ENSRNOG00000016023;ENSRNOG00000018903;…	0.00108822	34	260	ENSRNOG00000001007;ENSRNOG00000001436;ENSRNOG00000002393;ENSRNOG00000002946;ENSRNOG00000004072;ENSRNOG00000004377;ENSRNOG00000005513;ENSRNOG00000006302;ENSRNOG00000006859;ENSRNOG00000006989;ENSRNOG00000008377;ENSRNOG00000008837;ENSRNOG00000009565;ENSRNOG00000010748;ENSRNOG00000013704;ENSRNOG00000015654;ENSRNOG00000016023;ENSRNOG00000017702;ENSRNOG00000018237;ENSRNOG00000018677;ENSRNOG00000019113;…	0.00187108
GO:0071383	cellular response to steroid hormone stimulus					33	227	ENSRNOG00000000989;ENSRNOG00000002642;ENSRNOG00000003515;ENSRNOG00000004332;ENSRNOG00000004537;ENSRNOG00000006622;ENSRNOG00000007029;ENSRNOG00000007041;ENSRNOG00000007229;ENSRNOG00000007607;ENSRNOG00000008012;ENSRNOG00000010643;ENSRNOG00000010746;ENSRNOG00000012087;ENSRNOG00000012473;ENSRNOG00000012582;ENSRNOG00000012999;ENSRNOG00000014448;ENSRNOG00000018289;ENSRNOG00000018740;ENSRNOG00000022054;…	0.015056	26	227	ENSRNOG00000002642;ENSRNOG00000004537;ENSRNOG00000006067;ENSRNOG00000006622;ENSRNOG00000007029;ENSRNOG00000007229;ENSRNOG00000008012;ENSRNOG00000008837;ENSRNOG00000009446;ENSRNOG00000010643;ENSRNOG00000010746;ENSRNOG00000012087;ENSRNOG00000012999;ENSRNOG00000014448;ENSRNOG00000016907;ENSRNOG00000018237;ENSRNOG00000018740;ENSRNOG00000019812;ENSRNOG00000020679;ENSRNOG00000022054;ENSRNOG00000028616;…	0.0406967
GO:0071396	cellular response to lipid					69	550	ENSRNOG00000000604;ENSRNOG00000000967;ENSRNOG00000000989;ENSRNOG00000001148;ENSRNOG00000001420;ENSRNOG00000001585;ENSRNOG00000001926;ENSRNOG00000002520;ENSRNOG00000002642;ENSRNOG00000002671;ENSRNOG00000002693;ENSRNOG00000003515;ENSRNOG00000003709;ENSRNOG00000004332;ENSRNOG00000004466;ENSRNOG00000004537;ENSRNOG00000004649;ENSRNOG00000005542;ENSRNOG00000006338;ENSRNOG00000006622;ENSRNOG00000007029;…	0.00552246	57	550	ENSRNOG00000000604;ENSRNOG00000000967;ENSRNOG00000001926;ENSRNOG00000002292;ENSRNOG00000002520;ENSRNOG00000002642;ENSRNOG00000004100;ENSRNOG00000004466;ENSRNOG00000004537;ENSRNOG00000005542;ENSRNOG00000005861;ENSRNOG00000006067;ENSRNOG00000006622;ENSRNOG00000007029;ENSRNOG00000007229;ENSRNOG00000008012;ENSRNOG00000008672;ENSRNOG00000008837;ENSRNOG00000009446;ENSRNOG00000009488;ENSRNOG00000009565;…	0.00584321
GO:0071407	cellular response to organic cyclic compound					73	506	ENSRNOG00000000604;ENSRNOG00000000853;ENSRNOG00000000967;ENSRNOG00000000989;ENSRNOG00000001148;ENSRNOG00000001420;ENSRNOG00000001585;ENSRNOG00000002115;ENSRNOG00000002642;ENSRNOG00000002735;ENSRNOG00000003515;ENSRNOG00000004332;ENSRNOG00000004466;ENSRNOG00000004537;ENSRNOG00000004649;ENSRNOG00000004959;ENSRNOG00000005796;ENSRNOG00000006302;ENSRNOG00000006338;ENSRNOG00000006622;ENSRNOG00000006997;…	6.52098e-05	60	506	ENSRNOG00000000604;ENSRNOG00000000967;ENSRNOG00000002292;ENSRNOG00000002642;ENSRNOG00000002735;ENSRNOG00000004466;ENSRNOG00000004537;ENSRNOG00000005275;ENSRNOG00000005796;ENSRNOG00000005861;ENSRNOG00000006067;ENSRNOG00000006302;ENSRNOG00000006622;ENSRNOG00000007029;ENSRNOG00000007229;ENSRNOG00000008012;ENSRNOG00000008837;ENSRNOG00000009446;ENSRNOG00000009488;ENSRNOG00000010643;ENSRNOG00000010746;…	0.000147104
GO:0071417	cellular response to organonitrogen compound					68	506	ENSRNOG00000000604;ENSRNOG00000000853;ENSRNOG00000001007;ENSRNOG00000001148;ENSRNOG00000001420;ENSRNOG00000001436;ENSRNOG00000002115;ENSRNOG00000002393;ENSRNOG00000003626;ENSRNOG00000004107;ENSRNOG00000004172;ENSRNOG00000004332;ENSRNOG00000004377;ENSRNOG00000004649;ENSRNOG00000004959;ENSRNOG00000005513;ENSRNOG00000005796;ENSRNOG00000006302;ENSRNOG00000006859;ENSRNOG00000006997;ENSRNOG00000007235;…	0.00106244	56	506	ENSRNOG00000000604;ENSRNOG00000001007;ENSRNOG00000001436;ENSRNOG00000002292;ENSRNOG00000002393;ENSRNOG00000002946;ENSRNOG00000004072;ENSRNOG00000004377;ENSRNOG00000005275;ENSRNOG00000005513;ENSRNOG00000005796;ENSRNOG00000006302;ENSRNOG00000006859;ENSRNOG00000006989;ENSRNOG00000007089;ENSRNOG00000007235;ENSRNOG00000008012;ENSRNOG00000008377;ENSRNOG00000008672;ENSRNOG00000008837;ENSRNOG00000009565;…	0.00154552
GO:0071453	cellular response to oxygen levels					27	150	ENSRNOG00000001582;ENSRNOG00000006589;ENSRNOG00000006675;ENSRNOG00000009615;ENSRNOG00000010944;ENSRNOG00000012473;ENSRNOG00000012582;ENSRNOG00000012999;ENSRNOG00000013271;ENSRNOG00000013766;ENSRNOG00000014117;ENSRNOG00000015385;ENSRNOG00000017235;ENSRNOG00000017801;ENSRNOG00000017895;ENSRNOG00000019282;ENSRNOG00000019428;ENSRNOG00000019638;ENSRNOG00000019680;ENSRNOG00000019752;ENSRNOG00000020723;…	0.0020876	22	150	ENSRNOG00000006067;ENSRNOG00000006589;ENSRNOG00000009615;ENSRNOG00000010944;ENSRNOG00000012999;ENSRNOG00000013766;ENSRNOG00000014117;ENSRNOG00000017235;ENSRNOG00000019282;ENSRNOG00000019422;ENSRNOG00000019428;ENSRNOG00000019638;ENSRNOG00000020679;ENSRNOG00000020723;ENSRNOG00000021318;ENSRNOG00000028616;ENSRNOG00000028629;ENSRNOG00000036689;ENSRNOG00000049531;ENSRNOG00000054352;ENSRNOG00000056076;…	0.00557393
GO:0071456	cellular response to hypoxia					25	125	ENSRNOG00000001582;ENSRNOG00000006589;ENSRNOG00000006675;ENSRNOG00000009615;ENSRNOG00000010944;ENSRNOG00000012473;ENSRNOG00000012582;ENSRNOG00000012999;ENSRNOG00000013271;ENSRNOG00000013766;ENSRNOG00000014117;ENSRNOG00000015385;ENSRNOG00000017895;ENSRNOG00000019282;ENSRNOG00000019428;ENSRNOG00000019638;ENSRNOG00000019680;ENSRNOG00000019752;ENSRNOG00000020723;ENSRNOG00000023095;ENSRNOG00000028616;…	0.00074444	19	125	ENSRNOG00000006589;ENSRNOG00000009615;ENSRNOG00000010944;ENSRNOG00000012999;ENSRNOG00000013766;ENSRNOG00000014117;ENSRNOG00000019282;ENSRNOG00000019422;ENSRNOG00000019428;ENSRNOG00000019638;ENSRNOG00000020679;ENSRNOG00000020723;ENSRNOG00000021318;ENSRNOG00000028616;ENSRNOG00000028629;ENSRNOG00000036689;ENSRNOG00000049531;ENSRNOG00000056076;ENSRNOG00000058646	0.00809896
GO:0071466	cellular response to xenobiotic stimulus					20	127	ENSRNOG00000000853;ENSRNOG00000004332;ENSRNOG00000004342;ENSRNOG00000007041;ENSRNOG00000007395;ENSRNOG00000008012;ENSRNOG00000008988;ENSRNOG00000010746;ENSRNOG00000012458;ENSRNOG00000012473;ENSRNOG00000012582;ENSRNOG00000013484;ENSRNOG00000018740;ENSRNOG00000021924;ENSRNOG00000028616;ENSRNOG00000028891;ENSRNOG00000031004;ENSRNOG00000033164;ENSRNOG00000046727;ENSRNOG00000058186	0.0448697	20	127	ENSRNOG00000000158;ENSRNOG00000001967;ENSRNOG00000004342;ENSRNOG00000007395;ENSRNOG00000008012;ENSRNOG00000008837;ENSRNOG00000008988;ENSRNOG00000010633;ENSRNOG00000010746;ENSRNOG00000012458;ENSRNOG00000018237;ENSRNOG00000018740;ENSRNOG00000020679;ENSRNOG00000020817;ENSRNOG00000021924;ENSRNOG00000028616;ENSRNOG00000028891;ENSRNOG00000031896;ENSRNOG00000033164;ENSRNOG00000046727	0.00417854
GO:0071495	cellular response to endogenous stimulus					135	1184	ENSRNOG00000000604;ENSRNOG00000000847;ENSRNOG00000000853;ENSRNOG00000000967;ENSRNOG00000000989;ENSRNOG00000001007;ENSRNOG00000001148;ENSRNOG00000001420;ENSRNOG00000001436;ENSRNOG00000001585;ENSRNOG00000001926;ENSRNOG00000002115;ENSRNOG00000002393;ENSRNOG00000002642;ENSRNOG00000002828;ENSRNOG00000003515;ENSRNOG00000003626;ENSRNOG00000003977;ENSRNOG00000004107;ENSRNOG00000004172;ENSRNOG00000004332;…	0.00135525	116	1184	ENSRNOG00000000604;ENSRNOG00000000967;ENSRNOG00000001007;ENSRNOG00000001314;ENSRNOG00000001436;ENSRNOG00000001926;ENSRNOG00000002050;ENSRNOG00000002292;ENSRNOG00000002393;ENSRNOG00000002642;ENSRNOG00000002946;ENSRNOG00000003261;ENSRNOG00000003302;ENSRNOG00000003977;ENSRNOG00000004072;ENSRNOG00000004377;ENSRNOG00000004466;ENSRNOG00000004537;ENSRNOG00000005257;ENSRNOG00000005275;ENSRNOG00000005513;…	0.000135753
GO:0071496	cellular response to external stimulus					45	295	ENSRNOG00000000164;ENSRNOG00000000322;ENSRNOG00000000521;ENSRNOG00000000853;ENSRNOG00000001189;ENSRNOG00000001889;ENSRNOG00000002115;ENSRNOG00000002911;ENSRNOG00000003745;ENSRNOG00000004172;ENSRNOG00000004332;ENSRNOG00000004649;ENSRNOG00000005614;ENSRNOG00000005615;ENSRNOG00000006302;ENSRNOG00000006305;ENSRNOG00000007235;ENSRNOG00000008012;ENSRNOG00000008015;ENSRNOG00000009063;ENSRNOG00000009565;…	0.00108822	33	295	ENSRNOG00000000164;ENSRNOG00000000521;ENSRNOG00000001738;ENSRNOG00000005615;ENSRNOG00000006067;ENSRNOG00000006302;ENSRNOG00000006305;ENSRNOG00000007235;ENSRNOG00000008012;ENSRNOG00000009565;ENSRNOG00000009615;ENSRNOG00000010643;ENSRNOG00000014117;ENSRNOG00000016827;ENSRNOG00000016967;ENSRNOG00000018233;ENSRNOG00000018237;ENSRNOG00000018566;ENSRNOG00000019027;ENSRNOG00000019264;ENSRNOG00000019428;…	0.0217948
GO:0071616	acyl-CoA biosynthetic process					11	29	ENSRNOG00000000658;ENSRNOG00000004172;ENSRNOG00000006331;ENSRNOG00000006947;ENSRNOG00000007895;ENSRNOG00000009565;ENSRNOG00000014522;ENSRNOG00000016924;ENSRNOG00000018755;ENSRNOG00000019180;ENSRNOG00000048949	0.000318533	11	29	ENSRNOG00000000658;ENSRNOG00000006947;ENSRNOG00000007895;ENSRNOG00000009565;ENSRNOG00000009994;ENSRNOG00000010633;ENSRNOG00000014522;ENSRNOG00000016924;ENSRNOG00000018755;ENSRNOG00000019180;ENSRNOG00000048949	4.17946e-05
GO:0071702	organic substance transport					240	2127	ENSRNOG00000000053;ENSRNOG00000000150;ENSRNOG00000000164;ENSRNOG00000000186;ENSRNOG00000000314;ENSRNOG00000000322;ENSRNOG00000000411;ENSRNOG00000000520;ENSRNOG00000000521;ENSRNOG00000000557;ENSRNOG00000000571;ENSRNOG00000000796;ENSRNOG00000000841;ENSRNOG00000000853;ENSRNOG00000000967;ENSRNOG00000001083;ENSRNOG00000001173;ENSRNOG00000001415;ENSRNOG00000001420;ENSRNOG00000001436;ENSRNOG00000001709;…	5.20429e-06	206	2127	ENSRNOG00000000053;ENSRNOG00000000096;ENSRNOG00000000150;ENSRNOG00000000164;ENSRNOG00000000186;ENSRNOG00000000470;ENSRNOG00000000512;ENSRNOG00000000520;ENSRNOG00000000521;ENSRNOG00000000588;ENSRNOG00000000665;ENSRNOG00000000796;ENSRNOG00000000967;ENSRNOG00000001083;ENSRNOG00000001173;ENSRNOG00000001258;ENSRNOG00000001415;ENSRNOG00000001436;ENSRNOG00000001782;ENSRNOG00000002039;ENSRNOG00000002251;…	6.28239e-08
GO:0071705	nitrogen compound transport					201	1780	ENSRNOG00000000053;ENSRNOG00000000150;ENSRNOG00000000164;ENSRNOG00000000186;ENSRNOG00000000314;ENSRNOG00000000322;ENSRNOG00000000520;ENSRNOG00000000521;ENSRNOG00000000557;ENSRNOG00000000571;ENSRNOG00000000796;ENSRNOG00000000841;ENSRNOG00000000853;ENSRNOG00000000967;ENSRNOG00000001083;ENSRNOG00000001173;ENSRNOG00000001415;ENSRNOG00000001420;ENSRNOG00000001436;ENSRNOG00000001709;ENSRNOG00000002039;…	5.28095e-05	170	1780	ENSRNOG00000000053;ENSRNOG00000000096;ENSRNOG00000000150;ENSRNOG00000000164;ENSRNOG00000000186;ENSRNOG00000000470;ENSRNOG00000000520;ENSRNOG00000000521;ENSRNOG00000000588;ENSRNOG00000000796;ENSRNOG00000000967;ENSRNOG00000001083;ENSRNOG00000001173;ENSRNOG00000001258;ENSRNOG00000001415;ENSRNOG00000001436;ENSRNOG00000002039;ENSRNOG00000002251;ENSRNOG00000002615;ENSRNOG00000002636;ENSRNOG00000002735;…	4.83381e-06
GO:0071806	protein transmembrane transport					19	73	ENSRNOG00000000314;ENSRNOG00000005203;ENSRNOG00000006539;ENSRNOG00000007040;ENSRNOG00000009057;ENSRNOG00000009063;ENSRNOG00000009920;ENSRNOG00000013498;ENSRNOG00000014525;ENSRNOG00000018556;ENSRNOG00000019682;ENSRNOG00000019811;ENSRNOG00000019834;ENSRNOG00000025156;ENSRNOG00000037638;ENSRNOG00000043114;ENSRNOG00000045555;ENSRNOG00000049819;ENSRNOG00000059714	0.000169538	13	73	ENSRNOG00000006345;ENSRNOG00000006539;ENSRNOG00000007040;ENSRNOG00000007892;ENSRNOG00000008222;ENSRNOG00000009057;ENSRNOG00000013743;ENSRNOG00000014525;ENSRNOG00000018677;ENSRNOG00000019834;ENSRNOG00000025156;ENSRNOG00000034093;ENSRNOG00000059714	0.0124995
GO:0072522	purine-containing compound biosynthetic process					48	262	ENSRNOG00000000064;ENSRNOG00000000658;ENSRNOG00000002671;ENSRNOG00000002693;ENSRNOG00000002928;ENSRNOG00000003626;ENSRNOG00000004172;ENSRNOG00000006331;ENSRNOG00000006589;ENSRNOG00000006807;ENSRNOG00000006947;ENSRNOG00000007235;ENSRNOG00000007895;ENSRNOG00000008572;ENSRNOG00000009565;ENSRNOG00000009982;ENSRNOG00000010580;ENSRNOG00000012325;ENSRNOG00000014522;ENSRNOG00000014625;ENSRNOG00000014684;…	5.64461e-06	36	262	ENSRNOG00000000064;ENSRNOG00000000658;ENSRNOG00000003302;ENSRNOG00000005275;ENSRNOG00000006589;ENSRNOG00000006947;ENSRNOG00000007235;ENSRNOG00000007895;ENSRNOG00000008572;ENSRNOG00000009565;ENSRNOG00000009994;ENSRNOG00000010580;ENSRNOG00000010633;ENSRNOG00000012325;ENSRNOG00000014522;ENSRNOG00000014625;ENSRNOG00000015320;ENSRNOG00000016924;ENSRNOG00000018755;ENSRNOG00000019180;ENSRNOG00000019742;…	0.000499395
GO:0072524	pyridine-containing compound metabolic process					28	153	ENSRNOG00000003709;ENSRNOG00000006589;ENSRNOG00000006807;ENSRNOG00000009715;ENSRNOG00000009982;ENSRNOG00000015290;ENSRNOG00000017895;ENSRNOG00000019201;ENSRNOG00000019458;ENSRNOG00000019742;ENSRNOG00000020420;ENSRNOG00000023150;ENSRNOG00000023587;ENSRNOG00000029993;ENSRNOG00000031263;ENSRNOG00000034191;ENSRNOG00000046493;ENSRNOG00000049497;ENSRNOG00000050315;ENSRNOG00000050585;ENSRNOG00000050630;…	0.00124049	22	153	ENSRNOG00000005861;ENSRNOG00000006589;ENSRNOG00000008103;ENSRNOG00000009715;ENSRNOG00000013949;ENSRNOG00000017523;ENSRNOG00000019458;ENSRNOG00000019742;ENSRNOG00000020420;ENSRNOG00000022576;ENSRNOG00000023150;ENSRNOG00000023587;ENSRNOG00000029993;ENSRNOG00000034242;ENSRNOG00000046493;ENSRNOG00000050585;ENSRNOG00000052802;ENSRNOG00000056076;ENSRNOG00000056457;ENSRNOG00000056728;ENSRNOG00000057626;…	0.00689246
GO:0072593	reactive oxygen species metabolic process					39	227	ENSRNOG00000000053;ENSRNOG00000000322;ENSRNOG00000000521;ENSRNOG00000000853;ENSRNOG00000001964;ENSRNOG00000002115;ENSRNOG00000003763;ENSRNOG00000004332;ENSRNOG00000004649;ENSRNOG00000005615;ENSRNOG00000006375;ENSRNOG00000007235;ENSRNOG00000007649;ENSRNOG00000008364;ENSRNOG00000009439;ENSRNOG00000009565;ENSRNOG00000009615;ENSRNOG00000010452;ENSRNOG00000012290;ENSRNOG00000012473;ENSRNOG00000012772;…	0.000284642	29	227	ENSRNOG00000000053;ENSRNOG00000000521;ENSRNOG00000002802;ENSRNOG00000005615;ENSRNOG00000006375;ENSRNOG00000007081;ENSRNOG00000007235;ENSRNOG00000008364;ENSRNOG00000008837;ENSRNOG00000009565;ENSRNOG00000009615;ENSRNOG00000011016;ENSRNOG00000011039;ENSRNOG00000011849;ENSRNOG00000012772;ENSRNOG00000013704;ENSRNOG00000014525;ENSRNOG00000016460;ENSRNOG00000017820;ENSRNOG00000017821;ENSRNOG00000017866;…	0.00689246
GO:0072594	establishment of protein localization to organelle					62	315	ENSRNOG00000000164;ENSRNOG00000000314;ENSRNOG00000000521;ENSRNOG00000000796;ENSRNOG00000000923;ENSRNOG00000001173;ENSRNOG00000001420;ENSRNOG00000001429;ENSRNOG00000002225;ENSRNOG00000003747;ENSRNOG00000004060;ENSRNOG00000004637;ENSRNOG00000004700;ENSRNOG00000006539;ENSRNOG00000006913;ENSRNOG00000007040;ENSRNOG00000007665;ENSRNOG00000009057;ENSRNOG00000009063;ENSRNOG00000009713;ENSRNOG00000009920;…	7.74496e-09	40	315	ENSRNOG00000000164;ENSRNOG00000000521;ENSRNOG00000000796;ENSRNOG00000001173;ENSRNOG00000002615;ENSRNOG00000003747;ENSRNOG00000004060;ENSRNOG00000004700;ENSRNOG00000005358;ENSRNOG00000006345;ENSRNOG00000006539;ENSRNOG00000007040;ENSRNOG00000007665;ENSRNOG00000007892;ENSRNOG00000008222;ENSRNOG00000009057;ENSRNOG00000009882;ENSRNOG00000010235;ENSRNOG00000012693;ENSRNOG00000012999;ENSRNOG00000013743;…	0.000962608
GO:0072657	protein localization to membrane					57	452	ENSRNOG00000000068;ENSRNOG00000000314;ENSRNOG00000001420;ENSRNOG00000003147;ENSRNOG00000003232;ENSRNOG00000003747;ENSRNOG00000004060;ENSRNOG00000004332;ENSRNOG00000004405;ENSRNOG00000005276;ENSRNOG00000006338;ENSRNOG00000006399;ENSRNOG00000006539;ENSRNOG00000008056;ENSRNOG00000008320;ENSRNOG00000008414;ENSRNOG00000009057;ENSRNOG00000009071;ENSRNOG00000009102;ENSRNOG00000009713;ENSRNOG00000009945;…	0.0129271	57	452	ENSRNOG00000000048;ENSRNOG00000000068;ENSRNOG00000000096;ENSRNOG00000001293;ENSRNOG00000001706;ENSRNOG00000001825;ENSRNOG00000003147;ENSRNOG00000003232;ENSRNOG00000003747;ENSRNOG00000004060;ENSRNOG00000004072;ENSRNOG00000004405;ENSRNOG00000004657;ENSRNOG00000005276;ENSRNOG00000006345;ENSRNOG00000006539;ENSRNOG00000006989;ENSRNOG00000007744;ENSRNOG00000007892;ENSRNOG00000008056;ENSRNOG00000008222;…	4.17946e-05
GO:0072659	protein localization to plasma membrane					32	234	ENSRNOG00000000068;ENSRNOG00000003147;ENSRNOG00000003232;ENSRNOG00000004332;ENSRNOG00000005276;ENSRNOG00000006338;ENSRNOG00000008056;ENSRNOG00000008320;ENSRNOG00000008414;ENSRNOG00000009071;ENSRNOG00000009945;ENSRNOG00000010362;ENSRNOG00000010966;ENSRNOG00000011307;ENSRNOG00000012237;ENSRNOG00000012659;ENSRNOG00000012748;ENSRNOG00000012786;ENSRNOG00000015602;ENSRNOG00000018322;ENSRNOG00000018903;…	0.0394719	32	234	ENSRNOG00000000048;ENSRNOG00000000068;ENSRNOG00000001825;ENSRNOG00000003147;ENSRNOG00000003232;ENSRNOG00000004657;ENSRNOG00000005276;ENSRNOG00000006989;ENSRNOG00000007744;ENSRNOG00000008056;ENSRNOG00000008320;ENSRNOG00000008891;ENSRNOG00000010628;ENSRNOG00000010966;ENSRNOG00000011307;ENSRNOG00000012659;ENSRNOG00000014879;ENSRNOG00000015380;ENSRNOG00000015602;ENSRNOG00000017941;ENSRNOG00000018233;…	0.00133607
GO:0080090	regulation of primary metabolic process					463	4942	ENSRNOG00000000068;ENSRNOG00000000150;ENSRNOG00000000165;ENSRNOG00000000322;ENSRNOG00000000397;ENSRNOG00000000461;ENSRNOG00000000467;ENSRNOG00000000488;ENSRNOG00000000520;ENSRNOG00000000521;ENSRNOG00000000527;ENSRNOG00000000571;ENSRNOG00000000604;ENSRNOG00000000658;ENSRNOG00000000796;ENSRNOG00000000799;ENSRNOG00000000808;ENSRNOG00000000841;ENSRNOG00000000847;ENSRNOG00000000853;ENSRNOG00000000923;…	0.00747838	371	4942	ENSRNOG00000000068;ENSRNOG00000000150;ENSRNOG00000000165;ENSRNOG00000000397;ENSRNOG00000000422;ENSRNOG00000000461;ENSRNOG00000000520;ENSRNOG00000000521;ENSRNOG00000000527;ENSRNOG00000000604;ENSRNOG00000000658;ENSRNOG00000000796;ENSRNOG00000000799;ENSRNOG00000001030;ENSRNOG00000001050;ENSRNOG00000001647;ENSRNOG00000001738;ENSRNOG00000001979;ENSRNOG00000002050;ENSRNOG00000002125;ENSRNOG00000002278;…	0.00577256
GO:0080134	regulation of response to stress					114	1080	ENSRNOG00000000488;ENSRNOG00000000521;ENSRNOG00000000571;ENSRNOG00000000827;ENSRNOG00000000841;ENSRNOG00000001239;ENSRNOG00000001829;ENSRNOG00000001964;ENSRNOG00000002115;ENSRNOG00000002278;ENSRNOG00000002636;ENSRNOG00000002735;ENSRNOG00000002755;ENSRNOG00000002783;ENSRNOG00000002794;ENSRNOG00000002940;ENSRNOG00000003583;ENSRNOG00000003689;ENSRNOG00000003977;ENSRNOG00000004006;ENSRNOG00000004332;…	0.0410581	95	1080	ENSRNOG00000000521;ENSRNOG00000000827;ENSRNOG00000001050;ENSRNOG00000001239;ENSRNOG00000002278;ENSRNOG00000002636;ENSRNOG00000002735;ENSRNOG00000002783;ENSRNOG00000002794;ENSRNOG00000002802;ENSRNOG00000002946;ENSRNOG00000003977;ENSRNOG00000004726;ENSRNOG00000005615;ENSRNOG00000006380;ENSRNOG00000006392;ENSRNOG00000006589;ENSRNOG00000006622;ENSRNOG00000007029;ENSRNOG00000007081;ENSRNOG00000007457;…	0.018339
GO:0090110	cargo loading into COPII-coated vesicle					4	9	ENSRNOG00000002251;ENSRNOG00000004563;ENSRNOG00000008411;ENSRNOG00000014872	0.0483613	5	9	ENSRNOG00000002251;ENSRNOG00000004657;ENSRNOG00000005766;ENSRNOG00000008411;ENSRNOG00000014872	0.00276148
GO:0090114	COPII-coated vesicle budding					8	21	ENSRNOG00000002251;ENSRNOG00000004563;ENSRNOG00000005229;ENSRNOG00000005331;ENSRNOG00000008411;ENSRNOG00000014485;ENSRNOG00000014872;ENSRNOG00000019122	0.00345117	9	21	ENSRNOG00000002251;ENSRNOG00000004657;ENSRNOG00000005229;ENSRNOG00000005331;ENSRNOG00000005766;ENSRNOG00000008411;ENSRNOG00000010628;ENSRNOG00000014872;ENSRNOG00000019122	0.000114509
GO:0090181	regulation of cholesterol metabolic process					7	23	ENSRNOG00000002115;ENSRNOG00000005542;ENSRNOG00000009488;ENSRNOG00000012911;ENSRNOG00000018114;ENSRNOG00000020776;ENSRNOG00000020853	0.0268851	7	23	ENSRNOG00000005542;ENSRNOG00000009488;ENSRNOG00000009946;ENSRNOG00000012911;ENSRNOG00000013763;ENSRNOG00000018114;ENSRNOG00000020853	0.00871131
GO:0090407	organophosphate biosynthetic process					79	503	ENSRNOG00000000064;ENSRNOG00000000411;ENSRNOG00000000658;ENSRNOG00000001797;ENSRNOG00000002671;ENSRNOG00000002693;ENSRNOG00000002928;ENSRNOG00000003500;ENSRNOG00000003626;ENSRNOG00000003709;ENSRNOG00000004172;ENSRNOG00000004883;ENSRNOG00000006331;ENSRNOG00000006388;ENSRNOG00000006589;ENSRNOG00000006807;ENSRNOG00000006947;ENSRNOG00000007235;ENSRNOG00000007895;ENSRNOG00000008572;ENSRNOG00000009565;…	9.44559e-07	67	503	ENSRNOG00000000064;ENSRNOG00000000658;ENSRNOG00000001797;ENSRNOG00000003302;ENSRNOG00000006388;ENSRNOG00000006589;ENSRNOG00000006947;ENSRNOG00000007235;ENSRNOG00000007895;ENSRNOG00000008572;ENSRNOG00000009565;ENSRNOG00000009799;ENSRNOG00000009994;ENSRNOG00000010083;ENSRNOG00000010580;ENSRNOG00000010633;ENSRNOG00000011039;ENSRNOG00000011052;ENSRNOG00000011613;ENSRNOG00000012325;ENSRNOG00000013376;…	9.05781e-07
GO:0097190	apoptotic signaling pathway					65	475	ENSRNOG00000000521;ENSRNOG00000001420;ENSRNOG00000002115;ENSRNOG00000002618;ENSRNOG00000003232;ENSRNOG00000003689;ENSRNOG00000003745;ENSRNOG00000004172;ENSRNOG00000004649;ENSRNOG00000005418;ENSRNOG00000005796;ENSRNOG00000006019;ENSRNOG00000006302;ENSRNOG00000006756;ENSRNOG00000007367;ENSRNOG00000008580;ENSRNOG00000008652;ENSRNOG00000009068;ENSRNOG00000009568;ENSRNOG00000010558;ENSRNOG00000010944;…	0.000917368	48	475	ENSRNOG00000000521;ENSRNOG00000002618;ENSRNOG00000003232;ENSRNOG00000003302;ENSRNOG00000004964;ENSRNOG00000005796;ENSRNOG00000006067;ENSRNOG00000006302;ENSRNOG00000006756;ENSRNOG00000007367;ENSRNOG00000007838;ENSRNOG00000008551;ENSRNOG00000008580;ENSRNOG00000009068;ENSRNOG00000009568;ENSRNOG00000010558;ENSRNOG00000010944;ENSRNOG00000011282;ENSRNOG00000013409;ENSRNOG00000013766;ENSRNOG00000014117;…	0.0205575
GO:0097237	cellular response to toxic substance					36	223	ENSRNOG00000000571;ENSRNOG00000000604;ENSRNOG00000001420;ENSRNOG00000002115;ENSRNOG00000003763;ENSRNOG00000004245;ENSRNOG00000005195;ENSRNOG00000005418;ENSRNOG00000006589;ENSRNOG00000006675;ENSRNOG00000007649;ENSRNOG00000007743;ENSRNOG00000007964;ENSRNOG00000008012;ENSRNOG00000008364;ENSRNOG00000010558;ENSRNOG00000012081;ENSRNOG00000012772;ENSRNOG00000014117;ENSRNOG00000015385;ENSRNOG00000016727;…	0.00174258	27	223	ENSRNOG00000000604;ENSRNOG00000001890;ENSRNOG00000006067;ENSRNOG00000006589;ENSRNOG00000008012;ENSRNOG00000008364;ENSRNOG00000008510;ENSRNOG00000009088;ENSRNOG00000010558;ENSRNOG00000011039;ENSRNOG00000012772;ENSRNOG00000013704;ENSRNOG00000014117;ENSRNOG00000014604;ENSRNOG00000014915;ENSRNOG00000016727;ENSRNOG00000016885;ENSRNOG00000016907;ENSRNOG00000017765;ENSRNOG00000018237;ENSRNOG00000018740;…	0.0187023
GO:0097305	response to alcohol					42	268	ENSRNOG00000000053;ENSRNOG00000000521;ENSRNOG00000000604;ENSRNOG00000000967;ENSRNOG00000001148;ENSRNOG00000001926;ENSRNOG00000002115;ENSRNOG00000002636;ENSRNOG00000004060;ENSRNOG00000004959;ENSRNOG00000005796;ENSRNOG00000006338;ENSRNOG00000007235;ENSRNOG00000007964;ENSRNOG00000008015;ENSRNOG00000008140;ENSRNOG00000008364;ENSRNOG00000009488;ENSRNOG00000010196;ENSRNOG00000012458;ENSRNOG00000012582;…	0.00105056	41	268	ENSRNOG00000000053;ENSRNOG00000000158;ENSRNOG00000000521;ENSRNOG00000000604;ENSRNOG00000000967;ENSRNOG00000001738;ENSRNOG00000001926;ENSRNOG00000002050;ENSRNOG00000002292;ENSRNOG00000002636;ENSRNOG00000004060;ENSRNOG00000005796;ENSRNOG00000006067;ENSRNOG00000007235;ENSRNOG00000008364;ENSRNOG00000009488;ENSRNOG00000012123;ENSRNOG00000012458;ENSRNOG00000012772;ENSRNOG00000015206;ENSRNOG00000015320;…	1.2086e-05
GO:0097327	response to antineoplastic agent					19	110	ENSRNOG00000001148;ENSRNOG00000001926;ENSRNOG00000004332;ENSRNOG00000005796;ENSRNOG00000007041;ENSRNOG00000008012;ENSRNOG00000010746;ENSRNOG00000012473;ENSRNOG00000012582;ENSRNOG00000014117;ENSRNOG00000018795;ENSRNOG00000019113;ENSRNOG00000020444;ENSRNOG00000025602;ENSRNOG00000028616;ENSRNOG00000046727;ENSRNOG00000057464;ENSRNOG00000057626;ENSRNOG00000058186	0.0224946	17	110	ENSRNOG00000001926;ENSRNOG00000002292;ENSRNOG00000005796;ENSRNOG00000008012;ENSRNOG00000008837;ENSRNOG00000010746;ENSRNOG00000013704;ENSRNOG00000014117;ENSRNOG00000015072;ENSRNOG00000015380;ENSRNOG00000019113;ENSRNOG00000020444;ENSRNOG00000020679;ENSRNOG00000025602;ENSRNOG00000028616;ENSRNOG00000046727;ENSRNOG00000057626	0.0118762
GO:0097421	liver regeneration					12	50	ENSRNOG00000000847;ENSRNOG00000001926;ENSRNOG00000004332;ENSRNOG00000005276;ENSRNOG00000005513;ENSRNOG00000007390;ENSRNOG00000010189;ENSRNOG00000010746;ENSRNOG00000014117;ENSRNOG00000016967;ENSRNOG00000024603;ENSRNOG00000032825	0.0100263	10	50	ENSRNOG00000001926;ENSRNOG00000004741;ENSRNOG00000005276;ENSRNOG00000005513;ENSRNOG00000010746;ENSRNOG00000014117;ENSRNOG00000016967;ENSRNOG00000020918;ENSRNOG00000024603;ENSRNOG00000032825	0.0182307
GO:0106118	regulation of sterol biosynthetic process					6	13	ENSRNOG00000002115;ENSRNOG00000005542;ENSRNOG00000009488;ENSRNOG00000012911;ENSRNOG00000020776;ENSRNOG00000020853	0.00611428	5	13	ENSRNOG00000005542;ENSRNOG00000009488;ENSRNOG00000012911;ENSRNOG00000013763;ENSRNOG00000020853	0.0151937
GO:1901135	carbohydrate derivative metabolic process					157	966	ENSRNOG00000000064;ENSRNOG00000000165;ENSRNOG00000000411;ENSRNOG00000000571;ENSRNOG00000000658;ENSRNOG00000000800;ENSRNOG00000001797;ENSRNOG00000001889;ENSRNOG00000002186;ENSRNOG00000002536;ENSRNOG00000002643;ENSRNOG00000002671;ENSRNOG00000002693;ENSRNOG00000002928;ENSRNOG00000003163;ENSRNOG00000003239;ENSRNOG00000003626;ENSRNOG00000004172;ENSRNOG00000004649;ENSRNOG00000004725;ENSRNOG00000005195;…	8.45284e-15	123	966	ENSRNOG00000000064;ENSRNOG00000000165;ENSRNOG00000000658;ENSRNOG00000000800;ENSRNOG00000001314;ENSRNOG00000001653;ENSRNOG00000001797;ENSRNOG00000001823;ENSRNOG00000001967;ENSRNOG00000002186;ENSRNOG00000002615;ENSRNOG00000003302;ENSRNOG00000003728;ENSRNOG00000004725;ENSRNOG00000005358;ENSRNOG00000005668;ENSRNOG00000005861;ENSRNOG00000006388;ENSRNOG00000006589;ENSRNOG00000006779;ENSRNOG00000006947;…	2.75497e-11
GO:1901137	carbohydrate derivative biosynthetic process					73	595	ENSRNOG00000000064;ENSRNOG00000000411;ENSRNOG00000000658;ENSRNOG00000001797;ENSRNOG00000002536;ENSRNOG00000002643;ENSRNOG00000002671;ENSRNOG00000002693;ENSRNOG00000002928;ENSRNOG00000003239;ENSRNOG00000003626;ENSRNOG00000004172;ENSRNOG00000004649;ENSRNOG00000006331;ENSRNOG00000006388;ENSRNOG00000006589;ENSRNOG00000006807;ENSRNOG00000006947;ENSRNOG00000007235;ENSRNOG00000007492;ENSRNOG00000007895;…	0.00691337	57	595	ENSRNOG00000000064;ENSRNOG00000000658;ENSRNOG00000001653;ENSRNOG00000001797;ENSRNOG00000001823;ENSRNOG00000002615;ENSRNOG00000003302;ENSRNOG00000003728;ENSRNOG00000005358;ENSRNOG00000006388;ENSRNOG00000006589;ENSRNOG00000006947;ENSRNOG00000007235;ENSRNOG00000007492;ENSRNOG00000007895;ENSRNOG00000008572;ENSRNOG00000009565;ENSRNOG00000009799;ENSRNOG00000009994;ENSRNOG00000010580;ENSRNOG00000010633;…	0.0258363
GO:1901292	nucleoside phosphate catabolic process					24	149	ENSRNOG00000000815;ENSRNOG00000002186;ENSRNOG00000006589;ENSRNOG00000006807;ENSRNOG00000009094;ENSRNOG00000010580;ENSRNOG00000013791;ENSRNOG00000014522;ENSRNOG00000015290;ENSRNOG00000017895;ENSRNOG00000018397;ENSRNOG00000019742;ENSRNOG00000020420;ENSRNOG00000021233;ENSRNOG00000023150;ENSRNOG00000023587;ENSRNOG00000049497;ENSRNOG00000050585;ENSRNOG00000050630;ENSRNOG00000052802;ENSRNOG00000056076;…	0.0171385	22	149	ENSRNOG00000002186;ENSRNOG00000006589;ENSRNOG00000007570;ENSRNOG00000009094;ENSRNOG00000010580;ENSRNOG00000013791;ENSRNOG00000014522;ENSRNOG00000016321;ENSRNOG00000018397;ENSRNOG00000019742;ENSRNOG00000020420;ENSRNOG00000021233;ENSRNOG00000022576;ENSRNOG00000023150;ENSRNOG00000023587;ENSRNOG00000034242;ENSRNOG00000050585;ENSRNOG00000052802;ENSRNOG00000056076;ENSRNOG00000056457;ENSRNOG00000058249;…	0.00519756
GO:1901293	nucleoside phosphate biosynthetic process					58	319	ENSRNOG00000000064;ENSRNOG00000000658;ENSRNOG00000001797;ENSRNOG00000002671;ENSRNOG00000002693;ENSRNOG00000002928;ENSRNOG00000003626;ENSRNOG00000003709;ENSRNOG00000004172;ENSRNOG00000004883;ENSRNOG00000006331;ENSRNOG00000006589;ENSRNOG00000006807;ENSRNOG00000006947;ENSRNOG00000007235;ENSRNOG00000007895;ENSRNOG00000008572;ENSRNOG00000009565;ENSRNOG00000009982;ENSRNOG00000010083;ENSRNOG00000010580;…	4.62679e-07	42	319	ENSRNOG00000000064;ENSRNOG00000000658;ENSRNOG00000001797;ENSRNOG00000003302;ENSRNOG00000006589;ENSRNOG00000006947;ENSRNOG00000007235;ENSRNOG00000007895;ENSRNOG00000008572;ENSRNOG00000009565;ENSRNOG00000009994;ENSRNOG00000010083;ENSRNOG00000010580;ENSRNOG00000010633;ENSRNOG00000011052;ENSRNOG00000012325;ENSRNOG00000013949;ENSRNOG00000014522;ENSRNOG00000014625;ENSRNOG00000015124;ENSRNOG00000015320;…	0.000307359
GO:1901360	organic cyclic compound metabolic process					535	5059	ENSRNOG00000000064;ENSRNOG00000000397;ENSRNOG00000000461;ENSRNOG00000000467;ENSRNOG00000000488;ENSRNOG00000000520;ENSRNOG00000000521;ENSRNOG00000000604;ENSRNOG00000000658;ENSRNOG00000000808;ENSRNOG00000000815;ENSRNOG00000000841;ENSRNOG00000000867;ENSRNOG00000000909;ENSRNOG00000000923;ENSRNOG00000000989;ENSRNOG00000001030;ENSRNOG00000001139;ENSRNOG00000001172;ENSRNOG00000001189;ENSRNOG00000001239;…	1.96568e-10	408	5059	ENSRNOG00000000064;ENSRNOG00000000397;ENSRNOG00000000422;ENSRNOG00000000461;ENSRNOG00000000520;ENSRNOG00000000521;ENSRNOG00000000604;ENSRNOG00000000658;ENSRNOG00000001030;ENSRNOG00000001050;ENSRNOG00000001203;ENSRNOG00000001239;ENSRNOG00000001314;ENSRNOG00000001647;ENSRNOG00000001797;ENSRNOG00000001967;ENSRNOG00000002050;ENSRNOG00000002186;ENSRNOG00000002292;ENSRNOG00000002341;ENSRNOG00000002389;…	2.74722e-06
GO:1901361	organic cyclic compound catabolic process					69	456	ENSRNOG00000000815;ENSRNOG00000001889;ENSRNOG00000002186;ENSRNOG00000002735;ENSRNOG00000002828;ENSRNOG00000003253;ENSRNOG00000003709;ENSRNOG00000003773;ENSRNOG00000003863;ENSRNOG00000004726;ENSRNOG00000006589;ENSRNOG00000006807;ENSRNOG00000008639;ENSRNOG00000009094;ENSRNOG00000009488;ENSRNOG00000009615;ENSRNOG00000009977;ENSRNOG00000009982;ENSRNOG00000010580;ENSRNOG00000011785;ENSRNOG00000011910;…	2.4031e-05	63	456	ENSRNOG00000000422;ENSRNOG00000002186;ENSRNOG00000002292;ENSRNOG00000002701;ENSRNOG00000002735;ENSRNOG00000004726;ENSRNOG00000005266;ENSRNOG00000005861;ENSRNOG00000006067;ENSRNOG00000006420;ENSRNOG00000006589;ENSRNOG00000007081;ENSRNOG00000007570;ENSRNOG00000008639;ENSRNOG00000009094;ENSRNOG00000009245;ENSRNOG00000009488;ENSRNOG00000009615;ENSRNOG00000010262;ENSRNOG00000010537;ENSRNOG00000010580;…	6.38188e-07
GO:1901565	organonitrogen compound catabolic process					147	1049	ENSRNOG00000000164;ENSRNOG00000000571;ENSRNOG00000000815;ENSRNOG00000001391;ENSRNOG00000001598;ENSRNOG00000001602;ENSRNOG00000001719;ENSRNOG00000001829;ENSRNOG00000001889;ENSRNOG00000002186;ENSRNOG00000002358;ENSRNOG00000002636;ENSRNOG00000003253;ENSRNOG00000003709;ENSRNOG00000003773;ENSRNOG00000003809;ENSRNOG00000004006;ENSRNOG00000004107;ENSRNOG00000004130;ENSRNOG00000004332;ENSRNOG00000004464;…	6.03357e-09	130	1049	ENSRNOG00000000158;ENSRNOG00000000164;ENSRNOG00000000438;ENSRNOG00000000582;ENSRNOG00000001293;ENSRNOG00000001391;ENSRNOG00000002186;ENSRNOG00000002341;ENSRNOG00000002358;ENSRNOG00000002636;ENSRNOG00000002701;ENSRNOG00000003261;ENSRNOG00000003809;ENSRNOG00000004089;ENSRNOG00000004100;ENSRNOG00000004464;ENSRNOG00000004725;ENSRNOG00000005257;ENSRNOG00000005266;ENSRNOG00000005275;ENSRNOG00000005276;…	3.83703e-11
GO:1901568	fatty acid derivative metabolic process					20	104	ENSRNOG00000002642;ENSRNOG00000004245;ENSRNOG00000004649;ENSRNOG00000006331;ENSRNOG00000008245;ENSRNOG00000008755;ENSRNOG00000008988;ENSRNOG00000010580;ENSRNOG00000012458;ENSRNOG00000014508;ENSRNOG00000017672;ENSRNOG00000019180;ENSRNOG00000020480;ENSRNOG00000021924;ENSRNOG00000028891;ENSRNOG00000031004;ENSRNOG00000033164;ENSRNOG00000043233;ENSRNOG00000048949;ENSRNOG00000061857	0.00552246	18	104	ENSRNOG00000002642;ENSRNOG00000008245;ENSRNOG00000008755;ENSRNOG00000008988;ENSRNOG00000010580;ENSRNOG00000010633;ENSRNOG00000012458;ENSRNOG00000015072;ENSRNOG00000017672;ENSRNOG00000019180;ENSRNOG00000019626;ENSRNOG00000020480;ENSRNOG00000020817;ENSRNOG00000021924;ENSRNOG00000028891;ENSRNOG00000031312;ENSRNOG00000033164;ENSRNOG00000048949	0.00274044
GO:1901575	organic substance catabolic process					252	1668	ENSRNOG00000000164;ENSRNOG00000000571;ENSRNOG00000000658;ENSRNOG00000000815;ENSRNOG00000001177;ENSRNOG00000001385;ENSRNOG00000001391;ENSRNOG00000001598;ENSRNOG00000001602;ENSRNOG00000001719;ENSRNOG00000001829;ENSRNOG00000001889;ENSRNOG00000002186;ENSRNOG00000002225;ENSRNOG00000002358;ENSRNOG00000002636;ENSRNOG00000002735;ENSRNOG00000002755;ENSRNOG00000002828;ENSRNOG00000003253;ENSRNOG00000003500;…	3.23078e-20	211	1668	ENSRNOG00000000158;ENSRNOG00000000164;ENSRNOG00000000422;ENSRNOG00000000438;ENSRNOG00000000582;ENSRNOG00000000658;ENSRNOG00000001293;ENSRNOG00000001391;ENSRNOG00000001967;ENSRNOG00000002186;ENSRNOG00000002292;ENSRNOG00000002341;ENSRNOG00000002358;ENSRNOG00000002636;ENSRNOG00000002701;ENSRNOG00000002735;ENSRNOG00000003261;ENSRNOG00000003809;ENSRNOG00000004089;ENSRNOG00000004100;ENSRNOG00000004377;…	6.0057e-20
GO:1901652	response to peptide					74	456	ENSRNOG00000000165;ENSRNOG00000001007;ENSRNOG00000001420;ENSRNOG00000001436;ENSRNOG00000002393;ENSRNOG00000002478;ENSRNOG00000002572;ENSRNOG00000002671;ENSRNOG00000003253;ENSRNOG00000003626;ENSRNOG00000004107;ENSRNOG00000004172;ENSRNOG00000004284;ENSRNOG00000004377;ENSRNOG00000004649;ENSRNOG00000005513;ENSRNOG00000006302;ENSRNOG00000006338;ENSRNOG00000006589;ENSRNOG00000006622;ENSRNOG00000006859;…	7.02042e-07	62	456	ENSRNOG00000000158;ENSRNOG00000000165;ENSRNOG00000001007;ENSRNOG00000001436;ENSRNOG00000002393;ENSRNOG00000002478;ENSRNOG00000002572;ENSRNOG00000002946;ENSRNOG00000004072;ENSRNOG00000004284;ENSRNOG00000004377;ENSRNOG00000005513;ENSRNOG00000006302;ENSRNOG00000006380;ENSRNOG00000006589;ENSRNOG00000006622;ENSRNOG00000006859;ENSRNOG00000006989;ENSRNOG00000007089;ENSRNOG00000008012;ENSRNOG00000008047;…	1.46736e-06
[truncated: 474 more rows]

## Sheet: adrenal glands
Significantly (FDR < 0.05) enriched biological process (BP) terms for known genes identified in adrenal glands under various heat stress conditions. Green-colored cells represent the GO terms common to all the three organs (consensus heat-stress response [HSR]); grey-colored cells contain terms common to two comparisons (common HSR); and the remaining cells are color-coded by comparisons (red = C…
[truncated: 1,610 more rows]
