# Supplementary material for: Identification of Novel Mrna Isoforms Associated with Acute Heat Stress Response Using RNA-Sequencing Data in The Sprague-Dawley Rats
Source: Preprints.org preprint supplement (doi:10.20944/preprints202211.0380.v1), 2022-11-21
Supplement: Supplementary file 8 [file Table S8 KEGG analysis of all genes annotated by known transcripts and novel transcripts.xlsx]

## Sheet: Sheet1
Table S8. Significantly enriched pathways from differentially expressed transcript corresponding known genes identified in blood, liver and adrenal glands.
Summary of gene set analysis
Tissue (Criteria)	Comparisons	Total genes
Blood (P < 0.05, |FC|>2)	CT vs. H120	185
Liver (P < 0.01, FDR < 0.05, |FC|>2)	CT vs. H30	178
	CT vs. H60	1672
	CT vs. H120	1339
Adrenal glands (P < 0.01, FDR < 0.05, |FC|>2)	CT vs. H30	1234
	CT vs. H60	1416
	CT vs. H120	1226

## Sheet: blood
The significantly (FDR < 0.05) enriched pathways for known genes identified in blood (CT vs. H120).
KEGG_A_class	KEGG_B_class	Pathway	KEGG ID	No. of genes	FDR	Gene ID
Human Diseases	Cardiovascular diseases	Viral myocarditis	ko05416	13	8.72572e-10	ENSRNOG00000000451;ENSRNOG00000000562;ENSRNOG00000000723;ENSRNOG00000031090;ENSRNOG00000032596;ENSRNOG00000032708;ENSRNOG00000032844;ENSRNOG00000033215;ENSRNOG00000034254;ENSRNOG00000036701;ENSRNOG00000039744;ENSRNOG00000050210;ENSRNOG00000051002
Human Diseases	Immune diseases	Graft-versus-host disease	ko05332	11	2.15062e-09	ENSRNOG00000000451;ENSRNOG00000000562;ENSRNOG00000000723;ENSRNOG00000031090;ENSRNOG00000032596;ENSRNOG00000032708;ENSRNOG00000032844;ENSRNOG00000033215;ENSRNOG00000039744;ENSRNOG00000050210;ENSRNOG00000051002
Human Diseases	Immune diseases	Allograft rejection	ko05330	11	2.26964e-09	ENSRNOG00000000451;ENSRNOG00000000562;ENSRNOG00000000723;ENSRNOG00000031090;ENSRNOG00000032596;ENSRNOG00000032708;ENSRNOG00000032844;ENSRNOG00000033215;ENSRNOG00000039744;ENSRNOG00000050210;ENSRNOG00000051002
Human Diseases	Endocrine and metabolic diseases	Type I diabetes mellitus	ko04940	11	5.85657e-09	ENSRNOG00000000451;ENSRNOG00000000562;ENSRNOG00000000723;ENSRNOG00000031090;ENSRNOG00000032596;ENSRNOG00000032708;ENSRNOG00000032844;ENSRNOG00000033215;ENSRNOG00000039744;ENSRNOG00000050210;ENSRNOG00000051002
Human Diseases	Immune diseases	Autoimmune thyroid disease	ko05320	11	5.85657e-09	ENSRNOG00000000451;ENSRNOG00000000562;ENSRNOG00000000723;ENSRNOG00000031090;ENSRNOG00000032596;ENSRNOG00000032708;ENSRNOG00000032844;ENSRNOG00000033215;ENSRNOG00000039744;ENSRNOG00000050210;ENSRNOG00000051002
Cellular Processes	Transport and catabolism	Phagosome	ko04145	15	8.60911e-08	ENSRNOG00000000451;ENSRNOG00000000723;ENSRNOG00000017235;ENSRNOG00000021681;ENSRNOG00000031090;ENSRNOG00000032596;ENSRNOG00000032708;ENSRNOG00000032844;ENSRNOG00000033215;ENSRNOG00000034254;ENSRNOG00000036701;ENSRNOG00000039744;ENSRNOG00000050210;ENSRNOG00000051002;ENSRNOG00000061216
Organismal Systems	Immune system	Antigen processing and presentation	ko04612	10	1.14755e-06	ENSRNOG00000000451;ENSRNOG00000000723;ENSRNOG00000031090;ENSRNOG00000032596;ENSRNOG00000032708;ENSRNOG00000032844;ENSRNOG00000033215;ENSRNOG00000039744;ENSRNOG00000050210;ENSRNOG00000051002
Environmental Information Processing	Signaling molecules and interaction	Cell adhesion molecules (CAMs)	ko04514	12	1.24021e-05	ENSRNOG00000000451;ENSRNOG00000000655;ENSRNOG00000000723;ENSRNOG00000002776;ENSRNOG00000031090;ENSRNOG00000032596;ENSRNOG00000032708;ENSRNOG00000032844;ENSRNOG00000033215;ENSRNOG00000039744;ENSRNOG00000050210;ENSRNOG00000051002
Human Diseases	Infectious diseases	Influenza A	ko05164	11	0.00010875	ENSRNOG00000000451;ENSRNOG00000002946;ENSRNOG00000007539;ENSRNOG00000011352;ENSRNOG00000019675;ENSRNOG00000032708;ENSRNOG00000032844;ENSRNOG00000033215;ENSRNOG00000034254;ENSRNOG00000036701;ENSRNOG00000051002
Human Diseases	Infectious diseases	Herpes simplex infection	ko05168	12	0.000109443	ENSRNOG00000000451;ENSRNOG00000000723;ENSRNOG00000002946;ENSRNOG00000008015;ENSRNOG00000031090;ENSRNOG00000032596;ENSRNOG00000032708;ENSRNOG00000032844;ENSRNOG00000033215;ENSRNOG00000039744;ENSRNOG00000050210;ENSRNOG00000051002
Human Diseases	Infectious diseases	HTLV-I infection	ko05166	14	0.000134618	ENSRNOG00000000451;ENSRNOG00000000723;ENSRNOG00000008015;ENSRNOG00000008941;ENSRNOG00000015945;ENSRNOG00000031090;ENSRNOG00000032596;ENSRNOG00000032708;ENSRNOG00000032844;ENSRNOG00000033215;ENSRNOG00000039744;ENSRNOG00000039980;ENSRNOG00000050210;ENSRNOG00000051002
Organismal Systems	Immune system	Hematopoietic cell lineage	ko04640	8	0.000244226	ENSRNOG00000000451;ENSRNOG00000015945;ENSRNOG00000022071;ENSRNOG00000032708;ENSRNOG00000032844;ENSRNOG00000033215;ENSRNOG00000036674;ENSRNOG00000051002
Organismal Systems	Immune system	Natural killer cell mediated cytotoxicity	ko04650	9	0.000273339	ENSRNOG00000000562;ENSRNOG00000000723;ENSRNOG00000004737;ENSRNOG00000020845;ENSRNOG00000020849;ENSRNOG00000031090;ENSRNOG00000032596;ENSRNOG00000039744;ENSRNOG00000050210
Human Diseases	Immune diseases	Asthma	ko05310	5	0.000273632	ENSRNOG00000000451;ENSRNOG00000032708;ENSRNOG00000032844;ENSRNOG00000033215;ENSRNOG00000051002
Human Diseases	Immune diseases	Rheumatoid arthritis	ko05323	7	0.00128156	ENSRNOG00000000451;ENSRNOG00000008015;ENSRNOG00000017235;ENSRNOG00000032708;ENSRNOG00000032844;ENSRNOG00000033215;ENSRNOG00000051002
Organismal Systems	Immune system	Th1 and Th2 cell differentiation	ko04658	7	0.00139275	ENSRNOG00000000451;ENSRNOG00000008015;ENSRNOG00000015945;ENSRNOG00000032708;ENSRNOG00000032844;ENSRNOG00000033215;ENSRNOG00000051002
Human Diseases	Infectious diseases	Leishmaniasis	ko05140	6	0.00208631	ENSRNOG00000000451;ENSRNOG00000008015;ENSRNOG00000032708;ENSRNOG00000032844;ENSRNOG00000033215;ENSRNOG00000051002
Organismal Systems	Immune system	Intestinal immune network for IgA production	ko04672	5	0.00215482	ENSRNOG00000000451;ENSRNOG00000032708;ENSRNOG00000032844;ENSRNOG00000033215;ENSRNOG00000051002
Organismal Systems	Immune system	Th17 cell differentiation	ko04659	7	0.00356628	ENSRNOG00000000451;ENSRNOG00000008015;ENSRNOG00000015945;ENSRNOG00000032708;ENSRNOG00000032844;ENSRNOG00000033215;ENSRNOG00000051002
Human Diseases	Infectious diseases	Staphylococcus aureus infection	ko05150	5	0.00397463	ENSRNOG00000000451;ENSRNOG00000032708;ENSRNOG00000032844;ENSRNOG00000033215;ENSRNOG00000051002
Human Diseases	Immune diseases	Inflammatiory bowel disease (IBD)	ko05321	5	0.00881347	ENSRNOG00000000451;ENSRNOG00000032708;ENSRNOG00000032844;ENSRNOG00000033215;ENSRNOG00000051002
Human Diseases	Infectious diseases	Epstein-Barr virus infection	ko05169	9	0.0102039	ENSRNOG00000000723;ENSRNOG00000007249;ENSRNOG00000010420;ENSRNOG00000018087;ENSRNOG00000031090;ENSRNOG00000032596;ENSRNOG00000037580;ENSRNOG00000039744;ENSRNOG00000050210
Cellular Processes	Cell growth and death	Cellular senescence	ko04218	8	0.0114117	ENSRNOG00000000723;ENSRNOG00000008941;ENSRNOG00000031090;ENSRNOG00000032596;ENSRNOG00000039744;ENSRNOG00000039980;ENSRNOG00000050108;ENSRNOG00000050210
Cellular Processes	Cell motility	Regulation of actin cytoskeleton	ko04810	9	0.0114117	ENSRNOG00000014288;ENSRNOG00000014289;ENSRNOG00000015232;ENSRNOG00000017645;ENSRNOG00000020246;ENSRNOG00000022071;ENSRNOG00000034254;ENSRNOG00000036701;ENSRNOG00000047931
Cellular Processes	Transport and catabolism	Endocytosis	ko04144	10	0.0114117	ENSRNOG00000000723;ENSRNOG00000012957;ENSRNOG00000014289;ENSRNOG00000015232;ENSRNOG00000015753;ENSRNOG00000021681;ENSRNOG00000031090;ENSRNOG00000032596;ENSRNOG00000039744;ENSRNOG00000050210
Human Diseases	Infectious diseases	Toxoplasmosis	ko05145	6	0.0185957	ENSRNOG00000000451;ENSRNOG00000002568;ENSRNOG00000032708;ENSRNOG00000032844;ENSRNOG00000033215;ENSRNOG00000051002
Human Diseases	Immune diseases	Systemic lupus erythematosus	ko05322	6	0.0237554	ENSRNOG00000000451;ENSRNOG00000032708;ENSRNOG00000032844;ENSRNOG00000033215;ENSRNOG00000051002;ENSRNOG00000054017
Human Diseases	Infectious diseases	Salmonella infection	ko05132	5	0.0237554	ENSRNOG00000008015;ENSRNOG00000014289;ENSRNOG00000019675;ENSRNOG00000034254;ENSRNOG00000036701
Cellular Processes	Cellular community - eukaryotes	Focal adhesion	ko04510	8	0.0257166	ENSRNOG00000014288;ENSRNOG00000015232;ENSRNOG00000017354;ENSRNOG00000017645;ENSRNOG00000020246;ENSRNOG00000022071;ENSRNOG00000034254;ENSRNOG00000036701
Organismal Systems	Development	Osteoclast differentiation	ko04380	6	0.0318914	ENSRNOG00000002568;ENSRNOG00000002946;ENSRNOG00000008015;ENSRNOG00000019568;ENSRNOG00000020845;ENSRNOG00000042838
Human Diseases	Infectious diseases	Tuberculosis	ko05152	7	0.0326053	ENSRNOG00000000451;ENSRNOG00000017235;ENSRNOG00000021681;ENSRNOG00000032708;ENSRNOG00000032844;ENSRNOG00000033215;ENSRNOG00000051002
Human Diseases	Cancers	Viral carcinogenesis	ko05203	8	0.0359577	ENSRNOG00000000723;ENSRNOG00000007249;ENSRNOG00000017235;ENSRNOG00000031090;ENSRNOG00000032596;ENSRNOG00000039744;ENSRNOG00000050210;ENSRNOG00000054017
Metabolism	Energy metabolism	Oxidative phosphorylation	ko00190	6	0.0451003	ENSRNOG00000004526;ENSRNOG00000010807;ENSRNOG00000014078;ENSRNOG00000016952;ENSRNOG00000017235;ENSRNOG00000049912

## Sheet: Liver
Significantly (FDR < 0.05) enriched pathways for known genes identified in liver under various heat stress conditions. Green-colored cells represent the pathways common to all the three organs (consensus heat-stress response [HSR]); grey-colored cells contain terms common to two comparisons (common HSR); and the remaining cells are color-coded by comparisons (red = CT vs. H30 only; orange = CT vs…
KEGG_A_class	KEGG__B_class	Pathway	KEGG_ID	CK vs H30			CK vs H60			CK vs H120
				No. of genes	FDR	Gene ID	No. of genes	FDR	Gene ID	No. of genes	FDR	Gene ID
Metabolism	Global and overview maps	Metabolic pathways	ko01100	46	2.20802e-08	ENSRNOG00000002342;ENSRNOG00000006807;ENSRNOG00000012436;ENSRNOG00000018755;ENSRNOG00000023150;ENSRNOG00000050585	255	1.22647e-22	ENSRNOG00000002342;ENSRNOG00000006807;ENSRNOG00000007895;ENSRNOG00000009889;ENSRNOG00000011497;ENSRNOG00000012436;ENSRNOG00000015290;ENSRNOG00000016727;ENSRNOG00000017895;ENSRNOG00000018755;ENSRNOG00000020420;ENSRNOG00000023150;ENSRNOG00000028616;ENSRNOG00000050585;ENSRNOG00000051171;ENSRNOG00000052802;ENSRNOG00000058249;ENSRNOG00000061527	218	2.16345e-24	ENSRNOG00000001344;ENSRNOG00000002342;ENSRNOG00000007895;ENSRNOG00000009889;ENSRNOG00000009994;ENSRNOG00000011497;ENSRNOG00000012436;ENSRNOG00000016727;ENSRNOG00000018755;ENSRNOG00000020420;ENSRNOG00000023150;ENSRNOG00000028616;ENSRNOG00000050585;ENSRNOG00000051171;ENSRNOG00000052802;ENSRNOG00000058249
Metabolism	Lipid metabolism	Fatty acid degradation	ko00071	6	0.00140709	ENSRNOG00000002342;ENSRNOG00000012436;ENSRNOG00000012443;ENSRNOG00000018522;ENSRNOG00000019189;ENSRNOG00000047565	16	0.000149595	ENSRNOG00000001177;ENSRNOG00000002342;ENSRNOG00000008474;ENSRNOG00000008755;ENSRNOG00000009741;ENSRNOG00000009845;ENSRNOG00000011497;ENSRNOG00000012436;ENSRNOG00000013766;ENSRNOG00000014254;ENSRNOG00000016265;ENSRNOG00000018114;ENSRNOG00000019180;ENSRNOG00000020624;ENSRNOG00000024629;ENSRNOG00000029549	18	3.35684e-07	ENSRNOG00000001344;ENSRNOG00000002342;ENSRNOG00000008474;ENSRNOG00000008755;ENSRNOG00000009845;ENSRNOG00000010633;ENSRNOG00000011497;ENSRNOG00000012436;ENSRNOG00000012443;ENSRNOG00000013766;ENSRNOG00000016265;ENSRNOG00000018114;ENSRNOG00000019180;ENSRNOG00000019189;ENSRNOG00000020624;ENSRNOG00000024629;ENSRNOG00000029549;ENSRNOG00000032908
Metabolism	Carbohydrate metabolism	Glycolysis / Gluconeogenesis	ko00010	6	0.00581634	ENSRNOG00000010658;ENSRNOG00000012794;ENSRNOG00000023856;ENSRNOG00000050585;ENSRNOG00000056596	18	0.00130173	ENSRNOG00000001391;ENSRNOG00000002991;ENSRNOG00000008798;ENSRNOG00000010658;ENSRNOG00000011599;ENSRNOG00000016349;ENSRNOG00000017821;ENSRNOG00000023588;ENSRNOG00000046307;ENSRNOG00000050585;ENSRNOG00000056596	16	0.000967443	ENSRNOG00000001391;ENSRNOG00000005275;ENSRNOG00000006916;ENSRNOG00000008798;ENSRNOG00000010658;ENSRNOG00000011200;ENSRNOG00000011599;ENSRNOG00000012794;ENSRNOG00000016349;ENSRNOG00000017821;ENSRNOG00000023588;ENSRNOG00000046307;ENSRNOG00000050214;ENSRNOG00000050585;ENSRNOG00000056596
Metabolism	Amino acid metabolism	Glycine, serine and threonine metabolism	ko00260	5	0.00581634	ENSRNOG00000002342;ENSRNOG00000018522;ENSRNOG00000019189;ENSRNOG00000047565	11	0.0241727	ENSRNOG00000000967;ENSRNOG00000001177;ENSRNOG00000002342;ENSRNOG00000002636;ENSRNOG00000003049;ENSRNOG00000009845;ENSRNOG00000011497;ENSRNOG00000011684;ENSRNOG00000013293;ENSRNOG00000013766;ENSRNOG00000015077;ENSRNOG00000015354;ENSRNOG00000016552;ENSRNOG00000017821;ENSRNOG00000020624;ENSRNOG00000024629;ENSRNOG00000057042;ENSRNOG00000062125	15	1.45758e-05	ENSRNOG00000000967;ENSRNOG00000001344;ENSRNOG00000002342;ENSRNOG00000002636;ENSRNOG00000009845;ENSRNOG00000011497;ENSRNOG00000013766;ENSRNOG00000015029;ENSRNOG00000015077;ENSRNOG00000016552;ENSRNOG00000017752;ENSRNOG00000017821;ENSRNOG00000019189;ENSRNOG00000020624;ENSRNOG00000024629;ENSRNOG00000032908
Metabolism	Global and overview maps	Carbon metabolism	ko01200	8	0.00581634	ENSRNOG00000002342;ENSRNOG00000011250;ENSRNOG00000018522;ENSRNOG00000019189;ENSRNOG00000047565	28	0.000967373	ENSRNOG00000002342;ENSRNOG00000003709;ENSRNOG00000008364;ENSRNOG00000011250;ENSRNOG00000011497;ENSRNOG00000011861;ENSRNOG00000015354;ENSRNOG00000016097;ENSRNOG00000024629;ENSRNOG00000029993;ENSRNOG00000031263;ENSRNOG00000062125	29	5.9288e-06	ENSRNOG00000001344;ENSRNOG00000002342;ENSRNOG00000008364;ENSRNOG00000011250;ENSRNOG00000011497;ENSRNOG00000011612;ENSRNOG00000016097;ENSRNOG00000019189;ENSRNOG00000024629;ENSRNOG00000029993
Metabolism	Amino acid metabolism	Tryptophan metabolism	ko00380	5	0.00712573	ENSRNOG00000002342;ENSRNOG00000018522;ENSRNOG00000047565	12	0.0245755	ENSRNOG00000002342;ENSRNOG00000002636;ENSRNOG00000009845;ENSRNOG00000011497;ENSRNOG00000014522;ENSRNOG00000015591;ENSRNOG00000017105;ENSRNOG00000024629;ENSRNOG00000046379	10	0.0318017	ENSRNOG00000001344;ENSRNOG00000002342;ENSRNOG00000002636;ENSRNOG00000009845;ENSRNOG00000011497;ENSRNOG00000014522;ENSRNOG00000015591;ENSRNOG00000017105;ENSRNOG00000024629;ENSRNOG00000046379
Metabolism	Global and overview maps	Fatty acid metabolism	ko01212	5	0.00947182	ENSRNOG00000018522;ENSRNOG00000018755;ENSRNOG00000019189;ENSRNOG00000047565	20	6.04339e-06	ENSRNOG00000000658;ENSRNOG00000002636;ENSRNOG00000004448;ENSRNOG00000005686;ENSRNOG00000009845;ENSRNOG00000011622;ENSRNOG00000014522;ENSRNOG00000018755;ENSRNOG00000024629;ENSRNOG00000034013;ENSRNOG00000057042	21	4.82234e-08	ENSRNOG00000000658;ENSRNOG00000002636;ENSRNOG00000009845;ENSRNOG00000011622;ENSRNOG00000014522;ENSRNOG00000015029;ENSRNOG00000017481;ENSRNOG00000018755;ENSRNOG00000019189;ENSRNOG00000024629;ENSRNOG00000034013
Organismal Systems	Endocrine system	PPAR signaling pathway	ko03320	6	0.00947182	ENSRNOG00000002342;ENSRNOG00000003253;ENSRNOG00000003269;ENSRNOG00000003809;ENSRNOG00000005668;ENSRNOG00000005861;ENSRNOG00000006787;ENSRNOG00000006807;ENSRNOG00000009550;ENSRNOG00000009875;ENSRNOG00000010390;ENSRNOG00000010539;ENSRNOG00000010658;ENSRNOG00000011351;ENSRNOG00000011413;ENSRNOG00000011573;ENSRNOG00000012436;ENSRNOG00000012550;ENSRNOG00000012794;ENSRNOG00000013304;ENSRNOG00000013409;…	26	4.18941e-06	ENSRNOG00000000064;ENSRNOG00000000177;ENSRNOG00000000185;ENSRNOG00000000186;ENSRNOG00000000658;ENSRNOG00000000800;ENSRNOG00000000913;ENSRNOG00000001177;ENSRNOG00000001182;ENSRNOG00000001391;ENSRNOG00000001736;ENSRNOG00000001797;ENSRNOG00000001889;ENSRNOG00000002342;ENSRNOG00000002393;ENSRNOG00000002536;ENSRNOG00000002636;ENSRNOG00000002642;ENSRNOG00000002643;ENSRNOG00000002671;ENSRNOG00000002693;…	25	2.94657e-07	ENSRNOG00000000064;ENSRNOG00000000158;ENSRNOG00000000186;ENSRNOG00000000658;ENSRNOG00000000800;ENSRNOG00000000903;ENSRNOG00000001344;ENSRNOG00000001391;ENSRNOG00000001653;ENSRNOG00000001797;ENSRNOG00000001823;ENSRNOG00000001973;ENSRNOG00000002342;ENSRNOG00000002393;ENSRNOG00000002615;ENSRNOG00000002636;ENSRNOG00000002642;ENSRNOG00000002701;ENSRNOG00000002826;ENSRNOG00000003177;ENSRNOG00000003289;…
Metabolism	Carbohydrate metabolism	Propanoate metabolism	ko00640	4	0.00959212	ENSRNOG00000006807;ENSRNOG00000018522;ENSRNOG00000018755;ENSRNOG00000019189;ENSRNOG00000023150;ENSRNOG00000023856;ENSRNOG00000047565;ENSRNOG00000050585	11	0.00299947	ENSRNOG00000001177;ENSRNOG00000001391;ENSRNOG00000003163;ENSRNOG00000005686;ENSRNOG00000006807;ENSRNOG00000007895;ENSRNOG00000008364;ENSRNOG00000008553;ENSRNOG00000009715;ENSRNOG00000009845;ENSRNOG00000011599;ENSRNOG00000013331;ENSRNOG00000015290;ENSRNOG00000016064;ENSRNOG00000017895;ENSRNOG00000018755;ENSRNOG00000020420;ENSRNOG00000020704;ENSRNOG00000023150;ENSRNOG00000024629;ENSRNOG00000046307;…	11	0.000549413	ENSRNOG00000001391;ENSRNOG00000004601;ENSRNOG00000005275;ENSRNOG00000005849;ENSRNOG00000007895;ENSRNOG00000008103;ENSRNOG00000008364;ENSRNOG00000009715;ENSRNOG00000009845;ENSRNOG00000009994;ENSRNOG00000011599;ENSRNOG00000013704;ENSRNOG00000013949;ENSRNOG00000016064;ENSRNOG00000017481;ENSRNOG00000017523;ENSRNOG00000018755;ENSRNOG00000019189;ENSRNOG00000019372;ENSRNOG00000020420;ENSRNOG00000020704;…
Metabolism	Amino acid metabolism	Valine, leucine and isoleucine degradation	ko00280	4	0.0392544	ENSRNOG00000010539;ENSRNOG00000012443;ENSRNOG00000018522;ENSRNOG00000019189;ENSRNOG00000047565	18	0.00013542	ENSRNOG00000001177;ENSRNOG00000006331;ENSRNOG00000008474;ENSRNOG00000008755;ENSRNOG00000009845;ENSRNOG00000013552;ENSRNOG00000013766;ENSRNOG00000014254;ENSRNOG00000014702;ENSRNOG00000016265;ENSRNOG00000018114;ENSRNOG00000019180;ENSRNOG00000020440;ENSRNOG00000020480;ENSRNOG00000020624;ENSRNOG00000021808;ENSRNOG00000024629;ENSRNOG00000034013;ENSRNOG00000045636;ENSRNOG00000048949	16	0.000129609	ENSRNOG00000008474;ENSRNOG00000008755;ENSRNOG00000009630;ENSRNOG00000009845;ENSRNOG00000010633;ENSRNOG00000012443;ENSRNOG00000013552;ENSRNOG00000013766;ENSRNOG00000016265;ENSRNOG00000018114;ENSRNOG00000019180;ENSRNOG00000019189;ENSRNOG00000020440;ENSRNOG00000020480;ENSRNOG00000020624;ENSRNOG00000024629;ENSRNOG00000030232;ENSRNOG00000032908;ENSRNOG00000034013;ENSRNOG00000045636;ENSRNOG00000048949
Metabolism	Metabolism of other amino acids	beta-Alanine metabolism	ko00410	3	0.0498468	ENSRNOG00000011413;ENSRNOG00000012443;ENSRNOG00000019626;ENSRNOG00000040108;ENSRNOG00000046889;ENSRNOG00000049075	9	0.0273045	ENSRNOG00000000814;ENSRNOG00000003500;ENSRNOG00000004537;ENSRNOG00000006675;ENSRNOG00000008474;ENSRNOG00000008755;ENSRNOG00000009488;ENSRNOG00000009715;ENSRNOG00000009741;ENSRNOG00000009845;ENSRNOG00000010128;ENSRNOG00000011413;ENSRNOG00000012879;ENSRNOG00000013552;ENSRNOG00000014254;ENSRNOG00000016265;ENSRNOG00000017188;ENSRNOG00000019180;ENSRNOG00000020440;ENSRNOG00000028616;ENSRNOG00000034116;…	10	0.00188528	ENSRNOG00000004537;ENSRNOG00000007060;ENSRNOG00000007545;ENSRNOG00000008474;ENSRNOG00000008755;ENSRNOG00000009446;ENSRNOG00000009488;ENSRNOG00000009715;ENSRNOG00000009845;ENSRNOG00000010128;ENSRNOG00000010633;ENSRNOG00000012443;ENSRNOG00000013552;ENSRNOG00000016265;ENSRNOG00000017188;ENSRNOG00000019180;ENSRNOG00000019481;ENSRNOG00000019626;ENSRNOG00000020440;ENSRNOG00000028616;ENSRNOG00000032908;…
Metabolism	Energy metabolism	Oxidative phosphorylation	ko00190	12	2.95109e-05	ENSRNOG00000000557;ENSRNOG00000003269;ENSRNOG00000005668;ENSRNOG00000012550;ENSRNOG00000015320;ENSRNOG00000023387;ENSRNOG00000029971;ENSRNOG00000031033;ENSRNOG00000031053;ENSRNOG00000038218;ENSRNOG00000049394;ENSRNOG00000060293	55	4.56051e-17	ENSRNOG00000000064;ENSRNOG00000000557;ENSRNOG00000001182;ENSRNOG00000002721;ENSRNOG00000003163;ENSRNOG00000003626;ENSRNOG00000005668;ENSRNOG00000005698;ENSRNOG00000006939;ENSRNOG00000007235;ENSRNOG00000007392;ENSRNOG00000007407;ENSRNOG00000008218;ENSRNOG00000008329;ENSRNOG00000009364;ENSRNOG00000010807;ENSRNOG00000011905;ENSRNOG00000012550;ENSRNOG00000013331;ENSRNOG00000014078;ENSRNOG00000014568;…
Human Diseases	Neurodegenerative diseases	Parkinson disease	ko05012	10	0.00140709	ENSRNOG00000005668;ENSRNOG00000012550;ENSRNOG00000015320;ENSRNOG00000023387;ENSRNOG00000029971;ENSRNOG00000031033;ENSRNOG00000031053;ENSRNOG00000038218;ENSRNOG00000049394;ENSRNOG00000060293	56	2.68348e-16	ENSRNOG00000001182;ENSRNOG00000002721;ENSRNOG00000003163;ENSRNOG00000003626;ENSRNOG00000005257;ENSRNOG00000005668;ENSRNOG00000005698;ENSRNOG00000006375;ENSRNOG00000006939;ENSRNOG00000007235;ENSRNOG00000007407;ENSRNOG00000008329;ENSRNOG00000009364;ENSRNOG00000010452;ENSRNOG00000010558;ENSRNOG00000010807;ENSRNOG00000012550;ENSRNOG00000013331;ENSRNOG00000014078;ENSRNOG00000014568;ENSRNOG00000014625;…
Organismal Systems	Environmental adaptation	Thermogenesis	ko04714	11	0.00702587	ENSRNOG00000005668;ENSRNOG00000012443;ENSRNOG00000012550;ENSRNOG00000015320;ENSRNOG00000023387;ENSRNOG00000029971;ENSRNOG00000031033;ENSRNOG00000031053;ENSRNOG00000038218;ENSRNOG00000049394;ENSRNOG00000060293	67	1.13666e-12	ENSRNOG00000000064;ENSRNOG00000001142;ENSRNOG00000001182;ENSRNOG00000002721;ENSRNOG00000003163;ENSRNOG00000003626;ENSRNOG00000004553;ENSRNOG00000005257;ENSRNOG00000005668;ENSRNOG00000005698;ENSRNOG00000006939;ENSRNOG00000007235;ENSRNOG00000007407;ENSRNOG00000008329;ENSRNOG00000009364;ENSRNOG00000009615;ENSRNOG00000010807;ENSRNOG00000011931;ENSRNOG00000012550;ENSRNOG00000012826;ENSRNOG00000013331;…
Human Diseases	Endocrine and metabolic diseases	Non-alcoholic fatty liver disease (NAFLD)	ko04932	7	0.0372176	ENSRNOG00000005668;ENSRNOG00000012550;ENSRNOG00000023387;ENSRNOG00000031312;ENSRNOG00000038218;ENSRNOG00000049394;ENSRNOG00000060293	50	1.499e-11	ENSRNOG00000001142;ENSRNOG00000001182;ENSRNOG00000002721;ENSRNOG00000003163;ENSRNOG00000004649;ENSRNOG00000005668;ENSRNOG00000005698;ENSRNOG00000006939;ENSRNOG00000007407;ENSRNOG00000008329;ENSRNOG00000009364;ENSRNOG00000010452;ENSRNOG00000010807;ENSRNOG00000012458;ENSRNOG00000012550;ENSRNOG00000013331;ENSRNOG00000013536;ENSRNOG00000014078;ENSRNOG00000014568;ENSRNOG00000014597;ENSRNOG00000016660;…
Human Diseases	Neurodegenerative diseases	Alzheimer disease	ko05010	8	0.0262713	ENSRNOG00000005668;ENSRNOG00000012550;ENSRNOG00000015320;ENSRNOG00000023387;ENSRNOG00000031312;ENSRNOG00000038218;ENSRNOG00000049394;ENSRNOG00000060293	54	2.57348e-11	ENSRNOG00000001182;ENSRNOG00000001285;ENSRNOG00000002721;ENSRNOG00000003049;ENSRNOG00000003163;ENSRNOG00000003626;ENSRNOG00000004060;ENSRNOG00000004649;ENSRNOG00000005668;ENSRNOG00000005698;ENSRNOG00000006939;ENSRNOG00000006997;ENSRNOG00000007235;ENSRNOG00000007407;ENSRNOG00000008329;ENSRNOG00000009364;ENSRNOG00000010452;ENSRNOG00000010807;ENSRNOG00000012550;ENSRNOG00000013331;ENSRNOG00000014078;…
Genetic Information Processing	Translation	Ribosome	ko03010	9	0.00702587	ENSRNOG00000004196;ENSRNOG00000011817;ENSRNOG00000015335;ENSRNOG00000016220;ENSRNOG00000016896;ENSRNOG00000018320;ENSRNOG00000019453;ENSRNOG00000028505;ENSRNOG00000033803	43	5.07546e-07	ENSRNOG00000001148;ENSRNOG00000002569;ENSRNOG00000004107;ENSRNOG00000004196;ENSRNOG00000006898;ENSRNOG00000008140;ENSRNOG00000009567;ENSRNOG00000010189;ENSRNOG00000010746;ENSRNOG00000011494;ENSRNOG00000011817;ENSRNOG00000012650;ENSRNOG00000015989;ENSRNOG00000016961;ENSRNOG00000017418;ENSRNOG00000018057;ENSRNOG00000018320;ENSRNOG00000018645;ENSRNOG00000018795;ENSRNOG00000019453;ENSRNOG00000019734;…
Organismal Systems	Nervous system	Retrograde endocannabinoid signaling	ko04723	8	0.0133384	ENSRNOG00000005668;ENSRNOG00000023387;ENSRNOG00000029971;ENSRNOG00000031033;ENSRNOG00000031053;ENSRNOG00000038218;ENSRNOG00000049394;ENSRNOG00000060293	30	0.010902	ENSRNOG00000001182;ENSRNOG00000002721;ENSRNOG00000005257;ENSRNOG00000005668;ENSRNOG00000005698;ENSRNOG00000006939;ENSRNOG00000007407;ENSRNOG00000008167;ENSRNOG00000008329;ENSRNOG00000009364;ENSRNOG00000014078;ENSRNOG00000014508;ENSRNOG00000014568;ENSRNOG00000017446;ENSRNOG00000017571;ENSRNOG00000018129;ENSRNOG00000019570;ENSRNOG00000020602;ENSRNOG00000023387;ENSRNOG00000024568;ENSRNOG00000026616;…
Organismal Systems	Immune system	Antigen processing and presentation	ko04612	6	0.00947182	ENSRNOG00000028382;ENSRNOG00000029500;ENSRNOG00000030712;ENSRNOG00000038999;ENSRNOG00000042905;ENSRNOG00000050210	18	0.0119299	ENSRNOG00000000723;ENSRNOG00000015018;ENSRNOG00000016596;ENSRNOG00000017123;ENSRNOG00000019041;ENSRNOG00000019834;ENSRNOG00000028382;ENSRNOG00000029386;ENSRNOG00000029500;ENSRNOG00000033215;ENSRNOG00000033318;ENSRNOG00000034066;ENSRNOG00000039744;ENSRNOG00000042905;ENSRNOG00000045924;ENSRNOG00000050183;ENSRNOG00000050210;ENSRNOG00000059714
Metabolism	Carbohydrate metabolism	Glyoxylate and dicarboxylate metabolism	ko00630	4	0.00947182	ENSRNOG00000012794;ENSRNOG00000018755;ENSRNOG00000019189;ENSRNOG00000023856				12	7.82982e-05	ENSRNOG00000004601;ENSRNOG00000005275;ENSRNOG00000005849;ENSRNOG00000008103;ENSRNOG00000008364;ENSRNOG00000011599;ENSRNOG00000012794;ENSRNOG00000018755;ENSRNOG00000019189;ENSRNOG00000046307;ENSRNOG00000049560;ENSRNOG00000050214
Metabolism	Carbohydrate metabolism	Pyruvate metabolism	ko00620	4	0.0157386	ENSRNOG00000002342;ENSRNOG00000012794;ENSRNOG00000018755;ENSRNOG00000019189				15	5.42104e-06	ENSRNOG00000000658;ENSRNOG00000001344;ENSRNOG00000002342;ENSRNOG00000007895;ENSRNOG00000008103;ENSRNOG00000009715;ENSRNOG00000009994;ENSRNOG00000011497;ENSRNOG00000012794;ENSRNOG00000018755;ENSRNOG00000019189;ENSRNOG00000019372;ENSRNOG00000020420;ENSRNOG00000028616;ENSRNOG00000034013
Metabolism	Lipid metabolism	Steroid biosynthesis	ko00100	3	0.0195849	ENSRNOG00000006787;ENSRNOG00000009550;ENSRNOG00000020989				9	0.000213138	ENSRNOG00000002826;ENSRNOG00000006787;ENSRNOG00000009550;ENSRNOG00000019077;ENSRNOG00000020989;ENSRNOG00000032297;ENSRNOG00000053769;ENSRNOG00000054549;ENSRNOG00000057814
Metabolism	Global and overview maps	Biosynthesis of amino acids	ko01230	5	0.0372176	ENSRNOG00000006807;ENSRNOG00000010658;ENSRNOG00000011351;ENSRNOG00000013304;ENSRNOG00000050585				18	0.00194119	ENSRNOG00000000903;ENSRNOG00000001391;ENSRNOG00000003177;ENSRNOG00000005275;ENSRNOG00000005849;ENSRNOG00000008837;ENSRNOG00000010658;ENSRNOG00000011189;ENSRNOG00000013704;ENSRNOG00000013949;ENSRNOG00000016064;ENSRNOG00000019372;ENSRNOG00000020420;ENSRNOG00000020879;ENSRNOG00000049560;ENSRNOG00000050585;ENSRNOG00000052802;ENSRNOG00000058249
Cellular Processes	Transport and catabolism	Phagosome	ko04145	7	0.0498749	ENSRNOG00000003269;ENSRNOG00000030712;ENSRNOG00000038999;ENSRNOG00000040108;ENSRNOG00000042905;ENSRNOG00000050210;ENSRNOG00000053468				27	0.0090859	ENSRNOG00000000164;ENSRNOG00000003597;ENSRNOG00000006130;ENSRNOG00000006139;ENSRNOG00000006345;ENSRNOG00000008218;ENSRNOG00000008373;ENSRNOG00000010170;ENSRNOG00000010966;ENSRNOG00000012247;ENSRNOG00000013743;ENSRNOG00000017235;ENSRNOG00000018566;ENSRNOG00000018568;ENSRNOG00000021438;ENSRNOG00000032708;ENSRNOG00000033215;ENSRNOG00000034254;ENSRNOG00000038999;ENSRNOG00000039744;ENSRNOG00000045924;…
Genetic Information Processing	Transcription	Spliceosome	ko03040				37	9.12307e-07	ENSRNOG00000000520;ENSRNOG00000000841;ENSRNOG00000000989;ENSRNOG00000001783;ENSRNOG00000002818;ENSRNOG00000002871;ENSRNOG00000003844;ENSRNOG00000005513;ENSRNOG00000006655;ENSRNOG00000007315;ENSRNOG00000007629;ENSRNOG00000007766;ENSRNOG00000007921;ENSRNOG00000008912;ENSRNOG00000009960;ENSRNOG00000011932;ENSRNOG00000012021;ENSRNOG00000013516;ENSRNOG00000013533;ENSRNOG00000014762;ENSRNOG00000015844;…	21	0.0243191	ENSRNOG00000000520;ENSRNOG00000002818;ENSRNOG00000002871;ENSRNOG00000005513;ENSRNOG00000006380;ENSRNOG00000006655;ENSRNOG00000009960;ENSRNOG00000011932;ENSRNOG00000013516;ENSRNOG00000014762;ENSRNOG00000015914;ENSRNOG00000016016;ENSRNOG00000019113;ENSRNOG00000020412;ENSRNOG00000020763;ENSRNOG00000024170;ENSRNOG00000030157;ENSRNOG00000030374;ENSRNOG00000032232;ENSRNOG00000034066;ENSRNOG00000045791
Genetic Information Processing	Folding, sorting and degradation	Protein processing in endoplasmic reticulum	ko04141				39	1.81851e-05	ENSRNOG00000000150;ENSRNOG00000000314;ENSRNOG00000000800;ENSRNOG00000000902;ENSRNOG00000002251;ENSRNOG00000002609;ENSRNOG00000004464;ENSRNOG00000004563;ENSRNOG00000005203;ENSRNOG00000005310;ENSRNOG00000005958;ENSRNOG00000006143;ENSRNOG00000006228;ENSRNOG00000007029;ENSRNOG00000007492;ENSRNOG00000008411;ENSRNOG00000008604;ENSRNOG00000009057;ENSRNOG00000010352;ENSRNOG00000010944;ENSRNOG00000013360;…	42	2.20663e-09	ENSRNOG00000000150;ENSRNOG00000000438;ENSRNOG00000000800;ENSRNOG00000000902;ENSRNOG00000001050;ENSRNOG00000002251;ENSRNOG00000004464;ENSRNOG00000004657;ENSRNOG00000005310;ENSRNOG00000006228;ENSRNOG00000006345;ENSRNOG00000007029;ENSRNOG00000007492;ENSRNOG00000007892;ENSRNOG00000008411;ENSRNOG00000008648;ENSRNOG00000009057;ENSRNOG00000010628;ENSRNOG00000010944;ENSRNOG00000013743;ENSRNOG00000014872;…
Human Diseases	Cancers	Chemical carcinogenesis	ko05204				23	3.75519e-05	ENSRNOG00000000201;ENSRNOG00000003515;ENSRNOG00000004245;ENSRNOG00000007743;ENSRNOG00000012436;ENSRNOG00000012458;ENSRNOG00000013484;ENSRNOG00000016097;ENSRNOG00000018740;ENSRNOG00000020775;ENSRNOG00000021405;ENSRNOG00000021924;ENSRNOG00000024016;ENSRNOG00000029861;ENSRNOG00000032560;ENSRNOG00000033164;ENSRNOG00000033680;ENSRNOG00000042714;ENSRNOG00000046540;ENSRNOG00000046643;ENSRNOG00000049771;…	19	0.000184601	ENSRNOG00000000201;ENSRNOG00000001973;ENSRNOG00000005861;ENSRNOG00000012436;ENSRNOG00000012458;ENSRNOG00000016097;ENSRNOG00000018237;ENSRNOG00000018740;ENSRNOG00000020775;ENSRNOG00000021405;ENSRNOG00000021924;ENSRNOG00000024016;ENSRNOG00000032560;ENSRNOG00000033164;ENSRNOG00000033680;ENSRNOG00000042714;ENSRNOG00000046643;ENSRNOG00000047945;ENSRNOG00000056847
Metabolism	Lipid metabolism	Biosynthesis of unsaturated fatty acids	ko01040				13	4.95844e-05	ENSRNOG00000006331;ENSRNOG00000007395;ENSRNOG00000008474;ENSRNOG00000008755;ENSRNOG00000010580;ENSRNOG00000013552;ENSRNOG00000014702;ENSRNOG00000020440;ENSRNOG00000020480;ENSRNOG00000021808;ENSRNOG00000024629;ENSRNOG00000048949;ENSRNOG00000055295	12	3.53067e-05	ENSRNOG00000007395;ENSRNOG00000008474;ENSRNOG00000008755;ENSRNOG00000009630;ENSRNOG00000010580;ENSRNOG00000013552;ENSRNOG00000020440;ENSRNOG00000020480;ENSRNOG00000024629;ENSRNOG00000030232;ENSRNOG00000032908;ENSRNOG00000048949
Cellular Processes	Transport and catabolism	Peroxisome	ko04146				24	0.000149595	ENSRNOG00000002115;ENSRNOG00000006539;ENSRNOG00000006779;ENSRNOG00000007395;ENSRNOG00000008364;ENSRNOG00000008474;ENSRNOG00000008755;ENSRNOG00000008798;ENSRNOG00000010128;ENSRNOG00000011413;ENSRNOG00000013498;ENSRNOG00000014522;ENSRNOG00000016265;ENSRNOG00000018044;ENSRNOG00000018920;ENSRNOG00000019180;ENSRNOG00000019630;ENSRNOG00000020308;ENSRNOG00000020696;ENSRNOG00000021125;ENSRNOG00000028100;…	26	2.94657e-07	ENSRNOG00000000582;ENSRNOG00000004601;ENSRNOG00000006539;ENSRNOG00000006779;ENSRNOG00000007081;ENSRNOG00000007395;ENSRNOG00000008364;ENSRNOG00000008474;ENSRNOG00000008755;ENSRNOG00000008798;ENSRNOG00000010128;ENSRNOG00000010633;ENSRNOG00000013949;ENSRNOG00000014522;ENSRNOG00000016265;ENSRNOG00000018044;ENSRNOG00000018920;ENSRNOG00000019180;ENSRNOG00000019630;ENSRNOG00000020308;ENSRNOG00000020696;…
Organismal Systems	Digestive system	Cholesterol metabolism	ko04979				16	0.000609848	ENSRNOG00000003500;ENSRNOG00000005331;ENSRNOG00000005542;ENSRNOG00000006375;ENSRNOG00000009488;ENSRNOG00000017188;ENSRNOG00000018402;ENSRNOG00000018426;ENSRNOG00000019077;ENSRNOG00000019277;ENSRNOG00000019573;ENSRNOG00000025053;ENSRNOG00000040108;ENSRNOG00000047503;ENSRNOG00000050860;ENSRNOG00000060338	13	0.00232852	ENSRNOG00000005331;ENSRNOG00000005542;ENSRNOG00000006375;ENSRNOG00000007545;ENSRNOG00000009488;ENSRNOG00000009946;ENSRNOG00000014765;ENSRNOG00000017188;ENSRNOG00000019077;ENSRNOG00000025053;ENSRNOG00000047503;ENSRNOG00000050860;ENSRNOG00000053769
Metabolism	Metabolism of other amino acids	Glutathione metabolism	ko00480				18	0.00130173	ENSRNOG00000000201;ENSRNOG00000003289;ENSRNOG00000004245;ENSRNOG00000006302;ENSRNOG00000007743;ENSRNOG00000011781;ENSRNOG00000013484;ENSRNOG00000014387;ENSRNOG00000018964;ENSRNOG00000029861;ENSRNOG00000045752;ENSRNOG00000046379;ENSRNOG00000048812;ENSRNOG00000049771;ENSRNOG00000052564;ENSRNOG00000056728;ENSRNOG00000056847;ENSRNOG00000061857	13	0.0175042	ENSRNOG00000000201;ENSRNOG00000003289;ENSRNOG00000006302;ENSRNOG00000011781;ENSRNOG00000013409;ENSRNOG00000013949;ENSRNOG00000014610;ENSRNOG00000014915;ENSRNOG00000018237;ENSRNOG00000018964;ENSRNOG00000046379;ENSRNOG00000056728;ENSRNOG00000056847
Metabolism	Lipid metabolism	Steroid hormone biosynthesis	ko00140				17	0.00249895	ENSRNOG00000001889;ENSRNOG00000008988;ENSRNOG00000009488;ENSRNOG00000012458;ENSRNOG00000013004;ENSRNOG00000018740;ENSRNOG00000020035;ENSRNOG00000020775;ENSRNOG00000021405;ENSRNOG00000021924;ENSRNOG00000024016;ENSRNOG00000032560;ENSRNOG00000033164;ENSRNOG00000033680;ENSRNOG00000042714;ENSRNOG00000046540;ENSRNOG00000046643	21	6.21629e-07	ENSRNOG00000001973;ENSRNOG00000002826;ENSRNOG00000005861;ENSRNOG00000008074;ENSRNOG00000008988;ENSRNOG00000009488;ENSRNOG00000009630;ENSRNOG00000012458;ENSRNOG00000013004;ENSRNOG00000018740;ENSRNOG00000020775;ENSRNOG00000021405;ENSRNOG00000021924;ENSRNOG00000024016;ENSRNOG00000032487;ENSRNOG00000032560;ENSRNOG00000033164;ENSRNOG00000033680;ENSRNOG00000042714;ENSRNOG00000046643;ENSRNOG00000047945
Metabolism	Carbohydrate metabolism	Starch and sucrose metabolism	ko00500				10	0.00284744	ENSRNOG00000006388;ENSRNOG00000009889;ENSRNOG00000013791;ENSRNOG00000016214;ENSRNOG00000023150;ENSRNOG00000033529;ENSRNOG00000047656;ENSRNOG00000051171;ENSRNOG00000059753;ENSRNOG00000061527	8	0.00986196	ENSRNOG00000006388;ENSRNOG00000008079;ENSRNOG00000009889;ENSRNOG00000013791;ENSRNOG00000023150;ENSRNOG00000047656;ENSRNOG00000051171;ENSRNOG00000059753
Organismal Systems	Endocrine system	Glucagon signaling pathway	ko04922				22	0.00284744	ENSRNOG00000000165;ENSRNOG00000000658;ENSRNOG00000001142;ENSRNOG00000001189;ENSRNOG00000003712;ENSRNOG00000004060;ENSRNOG00000005257;ENSRNOG00000006388;ENSRNOG00000007895;ENSRNOG00000012826;ENSRNOG00000014254;ENSRNOG00000016770;ENSRNOG00000017801;ENSRNOG00000027773;ENSRNOG00000028616;ENSRNOG00000034013;ENSRNOG00000036692;ENSRNOG00000050585;ENSRNOG00000051171;ENSRNOG00000051592;ENSRNOG00000059753;…	18	0.0069564	ENSRNOG00000000165;ENSRNOG00000000658;ENSRNOG00000001142;ENSRNOG00000004060;ENSRNOG00000005257;ENSRNOG00000006388;ENSRNOG00000007895;ENSRNOG00000009882;ENSRNOG00000012826;ENSRNOG00000016770;ENSRNOG00000018677;ENSRNOG00000028616;ENSRNOG00000028629;ENSRNOG00000034013;ENSRNOG00000038202;ENSRNOG00000050585;ENSRNOG00000051171;ENSRNOG00000059753
Metabolism	Metabolism of cofactors and vitamins	Retinol metabolism	ko00830				17	0.00405248	ENSRNOG00000009741;ENSRNOG00000012436;ENSRNOG00000015354;ENSRNOG00000015736;ENSRNOG00000018740;ENSRNOG00000020775;ENSRNOG00000021405;ENSRNOG00000021924;ENSRNOG00000024016;ENSRNOG00000032560;ENSRNOG00000033164;ENSRNOG00000033680;ENSRNOG00000042714;ENSRNOG00000046540;ENSRNOG00000046643;ENSRNOG00000054770;ENSRNOG00000062125	14	0.00855653	ENSRNOG00000001973;ENSRNOG00000012436;ENSRNOG00000018740;ENSRNOG00000020775;ENSRNOG00000020817;ENSRNOG00000021405;ENSRNOG00000021924;ENSRNOG00000024016;ENSRNOG00000032560;ENSRNOG00000033164;ENSRNOG00000033680;ENSRNOG00000042714;ENSRNOG00000046643;ENSRNOG00000047945
Metabolism	Metabolism of cofactors and vitamins	Porphyrin and chlorophyll metabolism	ko00860				10	0.00689619	ENSRNOG00000000913;ENSRNOG00000002393;ENSRNOG00000003773;ENSRNOG00000010390;ENSRNOG00000014117;ENSRNOG00000015206;ENSRNOG00000018740;ENSRNOG00000042714;ENSRNOG00000046540;ENSRNOG00000056596	8	0.0175042	ENSRNOG00000001973;ENSRNOG00000002393;ENSRNOG00000011913;ENSRNOG00000014117;ENSRNOG00000015206;ENSRNOG00000018740;ENSRNOG00000042714;ENSRNOG00000056596
Cellular Processes	Cell growth and death	Ferroptosis	ko04216				12	0.00835883	ENSRNOG00000000322;ENSRNOG00000003809;ENSRNOG00000006302;ENSRNOG00000009832;ENSRNOG00000014117;ENSRNOG00000016265;ENSRNOG00000018964;ENSRNOG00000019180;ENSRNOG00000019277;ENSRNOG00000019768;ENSRNOG00000025443;ENSRNOG00000036852	11	0.00460887	ENSRNOG00000003809;ENSRNOG00000006302;ENSRNOG00000009832;ENSRNOG00000010633;ENSRNOG00000011913;ENSRNOG00000013409;ENSRNOG00000014117;ENSRNOG00000016265;ENSRNOG00000018964;ENSRNOG00000019180;ENSRNOG00000025443
Metabolism	Carbohydrate metabolism	Pentose and glucuronate interconversions	ko00040				8	0.010615	ENSRNOG00000000913;ENSRNOG00000002643;ENSRNOG00000014168;ENSRNOG00000016727;ENSRNOG00000018740;ENSRNOG00000042714;ENSRNOG00000046540;ENSRNOG00000050315	8	0.00264808	ENSRNOG00000001973;ENSRNOG00000008079;ENSRNOG00000009734;ENSRNOG00000009875;ENSRNOG00000014168;ENSRNOG00000016727;ENSRNOG00000018740;ENSRNOG00000042714
Human Diseases	Infectious diseases	Epstein-Barr virus infection	ko05169				37	0.0119299	ENSRNOG00000000521;ENSRNOG00000000604;ENSRNOG00000000723;ENSRNOG00000000847;ENSRNOG00000001436;ENSRNOG00000001719;ENSRNOG00000005257;ENSRNOG00000005276;ENSRNOG00000005528;ENSRNOG00000006751;ENSRNOG00000007390;ENSRNOG00000009568;ENSRNOG00000010028;ENSRNOG00000010408;ENSRNOG00000010420;ENSRNOG00000011157;ENSRNOG00000011414;ENSRNOG00000012026;ENSRNOG00000013545;ENSRNOG00000017730;ENSRNOG00000017843;…	29	0.0310562	ENSRNOG00000000521;ENSRNOG00000000604;ENSRNOG00000001050;ENSRNOG00000001436;ENSRNOG00000005257;ENSRNOG00000005276;ENSRNOG00000006355;ENSRNOG00000009568;ENSRNOG00000010028;ENSRNOG00000011157;ENSRNOG00000011414;ENSRNOG00000012026;ENSRNOG00000013545;ENSRNOG00000014097;ENSRNOG00000017843;ENSRNOG00000018677;ENSRNOG00000019742;ENSRNOG00000020679;ENSRNOG00000020799;ENSRNOG00000022485;ENSRNOG00000023546;…
Human Diseases	Cardiovascular diseases	Fluid shear stress and atherosclerosis	ko05418				28	0.0183378	ENSRNOG00000000201;ENSRNOG00000003147;ENSRNOG00000003977;ENSRNOG00000004060;ENSRNOG00000004245;ENSRNOG00000004649;ENSRNOG00000005614;ENSRNOG00000007743;ENSRNOG00000007916;ENSRNOG00000008015;ENSRNOG00000012081;ENSRNOG00000012772;ENSRNOG00000013484;ENSRNOG00000014117;ENSRNOG00000014297;ENSRNOG00000016133;ENSRNOG00000016770;ENSRNOG00000018903;ENSRNOG00000019598;ENSRNOG00000019834;ENSRNOG00000022071;…	24	0.0117343	ENSRNOG00000000201;ENSRNOG00000003147;ENSRNOG00000003977;ENSRNOG00000004060;ENSRNOG00000008837;ENSRNOG00000012772;ENSRNOG00000014117;ENSRNOG00000014297;ENSRNOG00000016770;ENSRNOG00000018237;ENSRNOG00000018566;ENSRNOG00000018677;ENSRNOG00000019598;ENSRNOG00000019834;ENSRNOG00000020679;ENSRNOG00000022485;ENSRNOG00000026963;ENSRNOG00000028629;ENSRNOG00000031312;ENSRNOG00000034254;ENSRNOG00000038202;…
Metabolism	Carbohydrate metabolism	Ascorbate and aldarate metabolism	ko00053				6	0.0266931	ENSRNOG00000002342;ENSRNOG00000002643;ENSRNOG00000011497;ENSRNOG00000018740;ENSRNOG00000042714;ENSRNOG00000046540	6	0.00923318	ENSRNOG00000001344;ENSRNOG00000001973;ENSRNOG00000002342;ENSRNOG00000011497;ENSRNOG00000018740;ENSRNOG00000042714
Organismal Systems	Immune system	Complement and coagulation cascades	ko04610				17	0.0369599	ENSRNOG00000002783;ENSRNOG00000003430;ENSRNOG00000007457;ENSRNOG00000011706;ENSRNOG00000012613;ENSRNOG00000012749;ENSRNOG00000015139;ENSRNOG00000016460;ENSRNOG00000017223;ENSRNOG00000018899;ENSRNOG00000024115;ENSRNOG00000030387;ENSRNOG00000030715;ENSRNOG00000032669;ENSRNOG00000042821;ENSRNOG00000050305;ENSRNOG00000057855	18	0.00180234	ENSRNOG00000002783;ENSRNOG00000003430;ENSRNOG00000007457;ENSRNOG00000007697;ENSRNOG00000011971;ENSRNOG00000015139;ENSRNOG00000016460;ENSRNOG00000017223;ENSRNOG00000018899;ENSRNOG00000024848;ENSRNOG00000025074;ENSRNOG00000030715;ENSRNOG00000032669;ENSRNOG00000042821;ENSRNOG00000046834;ENSRNOG00000048723;ENSRNOG00000051158;ENSRNOG00000051235
Environmental Information Processing	Signal transduction	AMPK signaling pathway	ko04152				23	0.0436469	ENSRNOG00000000068;ENSRNOG00000000165;ENSRNOG00000000658;ENSRNOG00000001142;ENSRNOG00000005963;ENSRNOG00000009615;ENSRNOG00000011282;ENSRNOG00000012582;ENSRNOG00000012826;ENSRNOG00000013552;ENSRNOG00000014254;ENSRNOG00000014522;ENSRNOG00000014597;ENSRNOG00000018901;ENSRNOG00000018903;ENSRNOG00000028616;ENSRNOG00000034013;ENSRNOG00000040108;ENSRNOG00000045636;ENSRNOG00000047088;ENSRNOG00000051171;…	20	0.0247133	ENSRNOG00000000068;ENSRNOG00000000165;ENSRNOG00000000658;ENSRNOG00000001142;ENSRNOG00000007990;ENSRNOG00000009615;ENSRNOG00000011282;ENSRNOG00000012826;ENSRNOG00000013552;ENSRNOG00000014522;ENSRNOG00000016122;ENSRNOG00000018677;ENSRNOG00000018901;ENSRNOG00000020918;ENSRNOG00000028616;ENSRNOG00000028629;ENSRNOG00000034013;ENSRNOG00000045636;ENSRNOG00000051171;ENSRNOG00000059753
Metabolism	Amino acid metabolism	Lysine degradation	ko00310	5	0.0133384	ENSRNOG00000002342;ENSRNOG00000018522;ENSRNOG00000019189;ENSRNOG00000047565;ENSRNOG00000061499
Metabolism	Carbohydrate metabolism	Butanoate metabolism	ko00650	3	0.0372176	ENSRNOG00000018522;ENSRNOG00000019189;ENSRNOG00000047565
Metabolism	Metabolism of cofactors and vitamins	Folate biosynthesis	ko00790	3	0.0372176	ENSRNOG00000003253;ENSRNOG00000009875;ENSRNOG00000015455
Human Diseases	Immune diseases	Graft-versus-host disease	ko05332	4	0.0372176	ENSRNOG00000030712;ENSRNOG00000038999;ENSRNOG00000042905;ENSRNOG00000050210
Human Diseases	Immune diseases	Allograft rejection	ko05330	4	0.0380885	ENSRNOG00000030712;ENSRNOG00000038999;ENSRNOG00000042905;ENSRNOG00000050210
Human Diseases	Endocrine and metabolic diseases	Type I diabetes mellitus	ko04940	4	0.0498749	ENSRNOG00000030712;ENSRNOG00000038999;ENSRNOG00000042905;ENSRNOG00000050210
Human Diseases	Immune diseases	Autoimmune thyroid disease	ko05320	4	0.0498749	ENSRNOG00000030712;ENSRNOG00000038999;ENSRNOG00000042905;ENSRNOG00000050210
Human Diseases	Neurodegenerative diseases	Huntington disease	ko05016				62	3.04238e-14	ENSRNOG00000000604;ENSRNOG00000001182;ENSRNOG00000001709;ENSRNOG00000002115;ENSRNOG00000002721;ENSRNOG00000003163;ENSRNOG00000003626;ENSRNOG00000004291;ENSRNOG00000005668;ENSRNOG00000005698;ENSRNOG00000006375;ENSRNOG00000006939;ENSRNOG00000007235;ENSRNOG00000007407;ENSRNOG00000008329;ENSRNOG00000009364;ENSRNOG00000009568;ENSRNOG00000010048;ENSRNOG00000010408;ENSRNOG00000010452;ENSRNOG00000010558;…
Metabolism	Xenobiotics biodegradation and metabolism	Drug metabolism - other enzymes	ko00983				23	3.75519e-05	ENSRNOG00000000201;ENSRNOG00000000913;ENSRNOG00000001797;ENSRNOG00000002671;ENSRNOG00000002693;ENSRNOG00000004245;ENSRNOG00000007743;ENSRNOG00000012458;ENSRNOG00000013484;ENSRNOG00000015438;ENSRNOG00000015519;ENSRNOG00000017105;ENSRNOG00000018740;ENSRNOG00000021233;ENSRNOG00000029861;ENSRNOG00000039079;ENSRNOG00000042714;ENSRNOG00000045752;ENSRNOG00000046540;ENSRNOG00000049771;ENSRNOG00000051151;…
Metabolism	Xenobiotics biodegradation and metabolism	Drug metabolism - cytochrome P450	ko00982				18	0.000205446	ENSRNOG00000000201;ENSRNOG00000003620;ENSRNOG00000004245;ENSRNOG00000007743;ENSRNOG00000012436;ENSRNOG00000012458;ENSRNOG00000013484;ENSRNOG00000015354;ENSRNOG00000018076;ENSRNOG00000018740;ENSRNOG00000029861;ENSRNOG00000034191;ENSRNOG00000042714;ENSRNOG00000046540;ENSRNOG00000049771;ENSRNOG00000056847;ENSRNOG00000061857;ENSRNOG00000062125
Metabolism	Xenobiotics biodegradation and metabolism	Metabolism of xenobiotics by cytochrome P450	ko00980				16	0.00239497	ENSRNOG00000000201;ENSRNOG00000003515;ENSRNOG00000004245;ENSRNOG00000007743;ENSRNOG00000012436;ENSRNOG00000012458;ENSRNOG00000013484;ENSRNOG00000017780;ENSRNOG00000017899;ENSRNOG00000018740;ENSRNOG00000029861;ENSRNOG00000042714;ENSRNOG00000046540;ENSRNOG00000049771;ENSRNOG00000056847;ENSRNOG00000061857
Cellular Processes	Transport and catabolism	Mitophagy - animal	ko04137				17	0.00249895	ENSRNOG00000000322;ENSRNOG00000000847;ENSRNOG00000001420;ENSRNOG00000003147;ENSRNOG00000005276;ENSRNOG00000005528;ENSRNOG00000008393;ENSRNOG00000012247;ENSRNOG00000012258;ENSRNOG00000014666;ENSRNOG00000015385;ENSRNOG00000017417;ENSRNOG00000017801;ENSRNOG00000020730;ENSRNOG00000026293;ENSRNOG00000043114;ENSRNOG00000053362
Metabolism	Energy metabolism	Sulfur metabolism	ko00920				5	0.0203187	ENSRNOG00000000172;ENSRNOG00000000185;ENSRNOG00000000186;ENSRNOG00000005987;ENSRNOG00000019982
Human Diseases	Cancers	Viral carcinogenesis	ko05203				37	0.0245755	ENSRNOG00000000521;ENSRNOG00000000604;ENSRNOG00000000723;ENSRNOG00000001436;ENSRNOG00000004300;ENSRNOG00000004726;ENSRNOG00000005257;ENSRNOG00000007390;ENSRNOG00000009568;ENSRNOG00000011157;ENSRNOG00000012826;ENSRNOG00000013536;ENSRNOG00000013963;ENSRNOG00000017219;ENSRNOG00000017235;ENSRNOG00000017801;ENSRNOG00000018183;ENSRNOG00000018903;ENSRNOG00000019113;ENSRNOG00000019264;ENSRNOG00000019277;…
Genetic Information Processing	Folding, sorting and degradation	Proteasome	ko03050				12	0.0276454	ENSRNOG00000001719;ENSRNOG00000006751;ENSRNOG00000007114;ENSRNOG00000010420;ENSRNOG00000011414;ENSRNOG00000012026;ENSRNOG00000017730;ENSRNOG00000019041;ENSRNOG00000019551;ENSRNOG00000019868;ENSRNOG00000037580;ENSRNOG00000048470
Metabolism	Amino acid metabolism	Cysteine and methionine metabolism	ko00270							14	0.000367361	ENSRNOG00000000158;ENSRNOG00000000186;ENSRNOG00000001391;ENSRNOG00000003177;ENSRNOG00000006302;ENSRNOG00000008103;ENSRNOG00000010658;ENSRNOG00000011200;ENSRNOG00000013409;ENSRNOG00000017777;ENSRNOG00000017821;ENSRNOG00000018964;ENSRNOG00000040120;ENSRNOG00000046379
Organismal Systems	Endocrine system	Adipocytokine signaling pathway	ko04920							17	0.000918314	ENSRNOG00000000658;ENSRNOG00000001142;ENSRNOG00000002946;ENSRNOG00000004537;ENSRNOG00000007990;ENSRNOG00000009446;ENSRNOG00000009615;ENSRNOG00000010633;ENSRNOG00000016265;ENSRNOG00000018677;ENSRNOG00000019180;ENSRNOG00000019742;ENSRNOG00000022485;ENSRNOG00000028616;ENSRNOG00000028629;ENSRNOG00000031312;ENSRNOG00000051171
Human Diseases	Endocrine and metabolic diseases	Insulin resistance	ko04931							21	0.00228067	ENSRNOG00000000658;ENSRNOG00000001142;ENSRNOG00000001269;ENSRNOG00000002946;ENSRNOG00000006388;ENSRNOG00000009615;ENSRNOG00000010128;ENSRNOG00000012826;ENSRNOG00000018494;ENSRNOG00000018677;ENSRNOG00000019626;ENSRNOG00000019742;ENSRNOG00000019812;ENSRNOG00000019977;ENSRNOG00000020723;ENSRNOG00000028616;ENSRNOG00000028629;ENSRNOG00000031312;ENSRNOG00000042411;ENSRNOG00000051171;ENSRNOG00000059753
Organismal Systems	Digestive system	Bile secretion	ko04976							16	0.0027069	ENSRNOG00000002948;ENSRNOG00000005257;ENSRNOG00000005794;ENSRNOG00000007229;ENSRNOG00000007395;ENSRNOG00000008012;ENSRNOG00000009446;ENSRNOG00000009488;ENSRNOG00000009946;ENSRNOG00000016122;ENSRNOG00000017775;ENSRNOG00000019626;ENSRNOG00000030538;ENSRNOG00000046727;ENSRNOG00000050860;ENSRNOG00000061883
Metabolism	Carbohydrate metabolism	Citrate cycle (TCA cycle)	ko00020							9	0.0069564	ENSRNOG00000005849;ENSRNOG00000007895;ENSRNOG00000008103;ENSRNOG00000009994;ENSRNOG00000013949;ENSRNOG00000016924;ENSRNOG00000017481;ENSRNOG00000019372;ENSRNOG00000028616
Metabolism	Lipid metabolism	Fatty acid biosynthesis	ko00061							6	0.0069564	ENSRNOG00000000658;ENSRNOG00000010633;ENSRNOG00000016265;ENSRNOG00000019180;ENSRNOG00000034013;ENSRNOG00000045636
Human Diseases	Infectious diseases	Staphylococcus aureus infection	ko05150							12	0.00855083	ENSRNOG00000002794;ENSRNOG00000011971;ENSRNOG00000017223;ENSRNOG00000018899;ENSRNOG00000020679;ENSRNOG00000025074;ENSRNOG00000030715;ENSRNOG00000032708;ENSRNOG00000033215;ENSRNOG00000046834;ENSRNOG00000051158;ENSRNOG00000051235
Organismal Systems	Endocrine system	Insulin signaling pathway	ko04910							22	0.0106479	ENSRNOG00000000658;ENSRNOG00000001142;ENSRNOG00000001269;ENSRNOG00000002946;ENSRNOG00000004060;ENSRNOG00000005257;ENSRNOG00000006388;ENSRNOG00000009615;ENSRNOG00000016770;ENSRNOG00000018494;ENSRNOG00000018677;ENSRNOG00000019634;ENSRNOG00000019977;ENSRNOG00000020420;ENSRNOG00000028616;ENSRNOG00000028629;ENSRNOG00000029028;ENSRNOG00000034013;ENSRNOG00000038202;ENSRNOG00000045636;ENSRNOG00000051171;…
Metabolism	Metabolism of terpenoids and polyketides	Terpenoid backbone biosynthesis	ko00900							7	0.0113105	ENSRNOG00000013376;ENSRNOG00000016122;ENSRNOG00000016552;ENSRNOG00000016690;ENSRNOG00000019189;ENSRNOG00000020696;ENSRNOG00000049604
Metabolism	Lipid metabolism	Primary bile acid biosynthesis	ko00120							6	0.0119513	ENSRNOG00000007395;ENSRNOG00000009488;ENSRNOG00000013004;ENSRNOG00000017188;ENSRNOG00000019481;ENSRNOG00000019626
Metabolism	Carbohydrate metabolism	Fructose and mannose metabolism	ko00051							9	0.0174396	ENSRNOG00000000165;ENSRNOG00000002615;ENSRNOG00000005358;ENSRNOG00000008047;ENSRNOG00000009734;ENSRNOG00000009875;ENSRNOG00000020704;ENSRNOG00000037229;ENSRNOG00000052802
Metabolism	Carbohydrate metabolism	Pentose phosphate pathway	ko00030							8	0.0175042	ENSRNOG00000007570;ENSRNOG00000009889;ENSRNOG00000016064;ENSRNOG00000017523;ENSRNOG00000023150;ENSRNOG00000046307;ENSRNOG00000052802;ENSRNOG00000056728
Metabolism	Amino acid metabolism	Arginine biosynthesis	ko00220							6	0.0274555	ENSRNOG00000000903;ENSRNOG00000008837;ENSRNOG00000011189;ENSRNOG00000013704;ENSRNOG00000020879;ENSRNOG00000049560
Metabolism	Lipid metabolism	Glycerolipid metabolism	ko00561							12	0.0324113	ENSRNOG00000001344;ENSRNOG00000002342;ENSRNOG00000004377;ENSRNOG00000009734;ENSRNOG00000009875;ENSRNOG00000011497;ENSRNOG00000015124;ENSRNOG00000016727;ENSRNOG00000020704;ENSRNOG00000022268;ENSRNOG00000034116;ENSRNOG00000046307
Metabolism	Amino acid metabolism	Alanine, aspartate and glutamate metabolism	ko00250							8	0.0434151	ENSRNOG00000000582;ENSRNOG00000000903;ENSRNOG00000002636;ENSRNOG00000008837;ENSRNOG00000013704;ENSRNOG00000017821;ENSRNOG00000046763;ENSRNOG00000049560
Human Diseases	Cancers	Pancreatic cancer	ko05212							13	0.047088	ENSRNOG00000000521;ENSRNOG00000005615;ENSRNOG00000009615;ENSRNOG00000011157;ENSRNOG00000013454;ENSRNOG00000013536;ENSRNOG00000018677;ENSRNOG00000019598;ENSRNOG00000019742;ENSRNOG00000020918;ENSRNOG00000022485;ENSRNOG00000025602;ENSRNOG00000028629

## Sheet: Adrenal glands
Significantly (FDR < 0.05) enriched pathways for known genes identified in adrenal glands under various heat stress conditions. Green-colored cells represent the pathways common to all the three organs (consensus heat-stress response [HSR]); grey-colored cells contain terms common to two comparisons (common HSR); and the remaining cells are color-coded by comparisons (red = CT vs. H30 only; orang…
KEGG_A_class	KEGG__B_class	Pathway	KEGG_ID	CK vs H30			CK vs H60			CK vs H120
				No. of genes	FDR	Gene ID	No. of genes	FDR	Gene ID	No. of genes	FDR	Gene ID
Genetic Information Processing	Folding, sorting and degradation	Protein processing in endoplasmic reticulum	ko04141	30	0.00033078	ENSRNOG00000000314;ENSRNOG00000000438;ENSRNOG00000000800;ENSRNOG00000001222;ENSRNOG00000005551;ENSRNOG00000007029;ENSRNOG00000008411;ENSRNOG00000008604;ENSRNOG00000009057;ENSRNOG00000009217;ENSRNOG00000010298;ENSRNOG00000010352;ENSRNOG00000011148;ENSRNOG00000012559;ENSRNOG00000013741;ENSRNOG00000014872;ENSRNOG00000015173;ENSRNOG00000016137;ENSRNOG00000017801;ENSRNOG00000018796;ENSRNOG00000019506;…	34	4.108e-05	ENSRNOG00000000314;ENSRNOG00000000902;ENSRNOG00000001050;ENSRNOG00000001348;ENSRNOG00000005470;ENSRNOG00000006789;ENSRNOG00000007029;ENSRNOG00000007434;ENSRNOG00000008604;ENSRNOG00000009057;ENSRNOG00000010524;ENSRNOG00000010819;ENSRNOG00000011066;ENSRNOG00000011148;ENSRNOG00000012559;ENSRNOG00000013061;ENSRNOG00000013469;ENSRNOG00000013741;ENSRNOG00000015018;ENSRNOG00000015079;ENSRNOG00000015173;…	28	0.000668914	ENSRNOG00000000314;ENSRNOG00000000902;ENSRNOG00000001222;ENSRNOG00000005470;ENSRNOG00000006462;ENSRNOG00000006789;ENSRNOG00000007029;ENSRNOG00000008604;ENSRNOG00000010524;ENSRNOG00000010819;ENSRNOG00000012559;ENSRNOG00000013061;ENSRNOG00000013469;ENSRNOG00000016137;ENSRNOG00000017795;ENSRNOG00000017801;ENSRNOG00000018796;ENSRNOG00000019282;ENSRNOG00000019506;ENSRNOG00000019834;ENSRNOG00000020938;…
Cellular Processes	Cell growth and death	Ferroptosis	ko04216	11	0.00318987	ENSRNOG00000003809;ENSRNOG00000006302;ENSRNOG00000009832;ENSRNOG00000016265;ENSRNOG00000018487;ENSRNOG00000019277;ENSRNOG00000019768;ENSRNOG00000020843;ENSRNOG00000030625;ENSRNOG00000031506;ENSRNOG00000036852	12	0.00387173	ENSRNOG00000003809;ENSRNOG00000010633;ENSRNOG00000014117;ENSRNOG00000018487;ENSRNOG00000018964;ENSRNOG00000019768;ENSRNOG00000020843;ENSRNOG00000022619;ENSRNOG00000025443;ENSRNOG00000030625;ENSRNOG00000031506;ENSRNOG00000036852	10	0.015473	ENSRNOG00000003809;ENSRNOG00000010633;ENSRNOG00000014117;ENSRNOG00000018487;ENSRNOG00000019180;ENSRNOG00000020843;ENSRNOG00000022619;ENSRNOG00000025443;ENSRNOG00000030625;ENSRNOG00000031506
Metabolism	Carbohydrate metabolism	Citrate cycle (TCA cycle)	ko00020	9	0.00529121	ENSRNOG00000001440;ENSRNOG00000003163;ENSRNOG00000005686;ENSRNOG00000005849;ENSRNOG00000015020;ENSRNOG00000017481;ENSRNOG00000019372;ENSRNOG00000024128;ENSRNOG00000028616	9	0.0132142	ENSRNOG00000001440;ENSRNOG00000005587;ENSRNOG00000005849;ENSRNOG00000007895;ENSRNOG00000008103;ENSRNOG00000016924;ENSRNOG00000017481;ENSRNOG00000022980;ENSRNOG00000023520
Metabolism	Energy metabolism	Oxidative phosphorylation	ko00190	32	1.8331e-06	ENSRNOG00000000064;ENSRNOG00000000557;ENSRNOG00000002721;ENSRNOG00000003163;ENSRNOG00000003269;ENSRNOG00000004526;ENSRNOG00000006939;ENSRNOG00000007392;ENSRNOG00000007407;ENSRNOG00000008218;ENSRNOG00000010807;ENSRNOG00000011849;ENSRNOG00000011891;ENSRNOG00000014078;ENSRNOG00000015320;ENSRNOG00000017032;ENSRNOG00000017235;ENSRNOG00000017571;ENSRNOG00000020602;ENSRNOG00000021177;ENSRNOG00000026616;…	25	0.00710113	ENSRNOG00000000064;ENSRNOG00000000557;ENSRNOG00000005698;ENSRNOG00000007235;ENSRNOG00000007392;ENSRNOG00000007407;ENSRNOG00000011891;ENSRNOG00000012091;ENSRNOG00000014656;ENSRNOG00000015320;ENSRNOG00000018281;ENSRNOG00000022980;ENSRNOG00000030644;ENSRNOG00000030700;ENSRNOG00000031053;ENSRNOG00000031766;ENSRNOG00000031851;ENSRNOG00000033299;ENSRNOG00000033615;ENSRNOG00000034234;ENSRNOG00000036742;…
Metabolism	Amino acid metabolism	Cysteine and methionine metabolism	ko00270	12	0.00303305	ENSRNOG00000000185;ENSRNOG00000001391;ENSRNOG00000001440;ENSRNOG00000003177;ENSRNOG00000006302;ENSRNOG00000010658;ENSRNOG00000011200;ENSRNOG00000013009;ENSRNOG00000015514;ENSRNOG00000016348;ENSRNOG00000017777;ENSRNOG00000040120	12	0.010079	ENSRNOG00000000158;ENSRNOG00000001440;ENSRNOG00000002262;ENSRNOG00000003177;ENSRNOG00000008103;ENSRNOG00000010658;ENSRNOG00000013000;ENSRNOG00000013520;ENSRNOG00000015514;ENSRNOG00000016356;ENSRNOG00000017777;ENSRNOG00000018964
Metabolism	Carbohydrate metabolism	Glyoxylate and dicarboxylate metabolism	ko00630	11	0.00033078	ENSRNOG00000001440;ENSRNOG00000005849;ENSRNOG00000007862;ENSRNOG00000015869;ENSRNOG00000018755;ENSRNOG00000019189;ENSRNOG00000023856;ENSRNOG00000024128;ENSRNOG00000046307;ENSRNOG00000049560;ENSRNOG00000050214	8	0.0427882	ENSRNOG00000001440;ENSRNOG00000005275;ENSRNOG00000005849;ENSRNOG00000008103;ENSRNOG00000008106;ENSRNOG00000019189;ENSRNOG00000023520;ENSRNOG00000049560
Metabolism	Global and overview maps	Metabolic pathways	ko01100	196	2.71287e-18	ENSRNOG00000000064;ENSRNOG00000000185;ENSRNOG00000000658;ENSRNOG00000000800;ENSRNOG00000001171;ENSRNOG00000001177;ENSRNOG00000001391;ENSRNOG00000001440;ENSRNOG00000001736;ENSRNOG00000001823;ENSRNOG00000001889;ENSRNOG00000001980;ENSRNOG00000001990;ENSRNOG00000002194;ENSRNOG00000002342;ENSRNOG00000002378;ENSRNOG00000002393;ENSRNOG00000002536;ENSRNOG00000002636;ENSRNOG00000002643;ENSRNOG00000002701;…	142	0.00923667	ENSRNOG00000000064;ENSRNOG00000000158;ENSRNOG00000000306;ENSRNOG00000000428;ENSRNOG00000000466;ENSRNOG00000001072;ENSRNOG00000001214;ENSRNOG00000001440;ENSRNOG00000002262;ENSRNOG00000002393;ENSRNOG00000002536;ENSRNOG00000002642;ENSRNOG00000002755;ENSRNOG00000003049;ENSRNOG00000003177;ENSRNOG00000003289;ENSRNOG00000003551;ENSRNOG00000003809;ENSRNOG00000003924;ENSRNOG00000004234;ENSRNOG00000004327;…
Metabolism	Global and overview maps	Carbon metabolism	ko01200	26	0.000117801	ENSRNOG00000001177;ENSRNOG00000001391;ENSRNOG00000001440;ENSRNOG00000003163;ENSRNOG00000005686;ENSRNOG00000005849;ENSRNOG00000006807;ENSRNOG00000007862;ENSRNOG00000007949;ENSRNOG00000009715;ENSRNOG00000013704;ENSRNOG00000015020;ENSRNOG00000015869;ENSRNOG00000016064;ENSRNOG00000017481;ENSRNOG00000018755;ENSRNOG00000019189;ENSRNOG00000019372;ENSRNOG00000023856;ENSRNOG00000024128;ENSRNOG00000028557;…	25	0.00122571	ENSRNOG00000001214;ENSRNOG00000001440;ENSRNOG00000005275;ENSRNOG00000005576;ENSRNOG00000005587;ENSRNOG00000005849;ENSRNOG00000007895;ENSRNOG00000008103;ENSRNOG00000008106;ENSRNOG00000009845;ENSRNOG00000016356;ENSRNOG00000017481;ENSRNOG00000017895;ENSRNOG00000018326;ENSRNOG00000019189;ENSRNOG00000022980;ENSRNOG00000023520;ENSRNOG00000033915;ENSRNOG00000046357;ENSRNOG00000050585;ENSRNOG00000052802;…
Metabolism	Global and overview maps	Biosynthesis of amino acids	ko01230	18	0.00111447	ENSRNOG00000001391;ENSRNOG00000003177;ENSRNOG00000004302;ENSRNOG00000005849;ENSRNOG00000006807;ENSRNOG00000010658;ENSRNOG00000013304;ENSRNOG00000013704;ENSRNOG00000015020;ENSRNOG00000015514;ENSRNOG00000016064;ENSRNOG00000016348;ENSRNOG00000019372;ENSRNOG00000024128;ENSRNOG00000049560;ENSRNOG00000052802;ENSRNOG00000058249;ENSRNOG00000060262	21	0.000242307	ENSRNOG00000001214;ENSRNOG00000003177;ENSRNOG00000005275;ENSRNOG00000005576;ENSRNOG00000005849;ENSRNOG00000008106;ENSRNOG00000008837;ENSRNOG00000010658;ENSRNOG00000013520;ENSRNOG00000015514;ENSRNOG00000016356;ENSRNOG00000017895;ENSRNOG00000023520;ENSRNOG00000033915;ENSRNOG00000049560;ENSRNOG00000050585;ENSRNOG00000052802;ENSRNOG00000054724;ENSRNOG00000058249;ENSRNOG00000059579;ENSRNOG00000060262
Genetic Information Processing	Translation	Ribosome	ko03010	30	0.00033078	ENSRNOG00000000957;ENSRNOG00000001148;ENSRNOG00000002569;ENSRNOG00000009567;ENSRNOG00000011817;ENSRNOG00000012650;ENSRNOG00000015335;ENSRNOG00000015989;ENSRNOG00000016220;ENSRNOG00000016896;ENSRNOG00000016961;ENSRNOG00000017418;ENSRNOG00000018320;ENSRNOG00000019007;ENSRNOG00000019974;ENSRNOG00000020982;ENSRNOG00000021005;ENSRNOG00000025936;ENSRNOG00000026260;ENSRNOG00000027503;ENSRNOG00000028993;…	35	3.56792e-05	ENSRNOG00000000490;ENSRNOG00000000957;ENSRNOG00000001148;ENSRNOG00000002178;ENSRNOG00000004196;ENSRNOG00000008140;ENSRNOG00000008551;ENSRNOG00000009567;ENSRNOG00000010189;ENSRNOG00000011817;ENSRNOG00000015335;ENSRNOG00000016220;ENSRNOG00000016387;ENSRNOG00000016896;ENSRNOG00000016961;ENSRNOG00000017418;ENSRNOG00000018320;ENSRNOG00000019453;ENSRNOG00000020354;ENSRNOG00000020869;ENSRNOG00000025936;…
Organismal Systems	Environmental adaptation	Thermogenesis	ko04714	38	0.000404621	ENSRNOG00000000064;ENSRNOG00000001142;ENSRNOG00000002721;ENSRNOG00000003163;ENSRNOG00000003990;ENSRNOG00000004526;ENSRNOG00000004553;ENSRNOG00000005413;ENSRNOG00000006939;ENSRNOG00000007407;ENSRNOG00000009271;ENSRNOG00000010807;ENSRNOG00000011849;ENSRNOG00000011931;ENSRNOG00000014078;ENSRNOG00000014254;ENSRNOG00000015320;ENSRNOG00000016265;ENSRNOG00000017032;ENSRNOG00000017571;ENSRNOG00000020602;…	35	0.0132142	ENSRNOG00000000064;ENSRNOG00000005413;ENSRNOG00000005698;ENSRNOG00000006632;ENSRNOG00000007235;ENSRNOG00000007407;ENSRNOG00000010633;ENSRNOG00000011931;ENSRNOG00000014656;ENSRNOG00000015320;ENSRNOG00000018281;ENSRNOG00000020288;ENSRNOG00000020289;ENSRNOG00000020487;ENSRNOG00000020546;ENSRNOG00000022980;ENSRNOG00000025385;ENSRNOG00000025889;ENSRNOG00000030644;ENSRNOG00000030700;ENSRNOG00000031053;…
Human Diseases	Neurodegenerative diseases	Parkinson disease	ko05012	34	1.11485e-06	ENSRNOG00000001222;ENSRNOG00000002343;ENSRNOG00000002721;ENSRNOG00000003163;ENSRNOG00000004526;ENSRNOG00000006939;ENSRNOG00000007407;ENSRNOG00000010558;ENSRNOG00000010807;ENSRNOG00000011849;ENSRNOG00000011992;ENSRNOG00000012944;ENSRNOG00000014078;ENSRNOG00000015320;ENSRNOG00000015385;ENSRNOG00000016592;ENSRNOG00000017032;ENSRNOG00000017571;ENSRNOG00000018289;ENSRNOG00000019277;ENSRNOG00000020410;…	28	0.00185145	ENSRNOG00000002343;ENSRNOG00000005698;ENSRNOG00000007235;ENSRNOG00000007407;ENSRNOG00000007434;ENSRNOG00000010558;ENSRNOG00000011992;ENSRNOG00000014656;ENSRNOG00000015320;ENSRNOG00000015385;ENSRNOG00000018281;ENSRNOG00000019465;ENSRNOG00000019749;ENSRNOG00000020410;ENSRNOG00000022980;ENSRNOG00000030644;ENSRNOG00000030700;ENSRNOG00000031053;ENSRNOG00000031766;ENSRNOG00000031851;ENSRNOG00000033299;…
Metabolism	Global and overview maps	Fatty acid metabolism	ko01212	13	0.00279235	ENSRNOG00000001177;ENSRNOG00000006331;ENSRNOG00000007862;ENSRNOG00000010697;ENSRNOG00000010800;ENSRNOG00000014254;ENSRNOG00000016265;ENSRNOG00000019189;ENSRNOG00000020440;ENSRNOG00000020480;ENSRNOG00000032908;ENSRNOG00000034013;ENSRNOG00000045636				10	0.0431713	ENSRNOG00000005993;ENSRNOG00000006331;ENSRNOG00000010633;ENSRNOG00000013279;ENSRNOG00000019180;ENSRNOG00000019189;ENSRNOG00000020480;ENSRNOG00000021808;ENSRNOG00000045636;ENSRNOG00000046005
Genetic Information Processing	Folding, sorting and degradation	Proteasome	ko03050	10	0.0318963	ENSRNOG00000006751;ENSRNOG00000007114;ENSRNOG00000011414;ENSRNOG00000011745;ENSRNOG00000014097;ENSRNOG00000017730;ENSRNOG00000019551;ENSRNOG00000019868;ENSRNOG00000052730;ENSRNOG00000055984				13	0.00142437	ENSRNOG00000001719;ENSRNOG00000005538;ENSRNOG00000006751;ENSRNOG00000010038;ENSRNOG00000011414;ENSRNOG00000011745;ENSRNOG00000013493;ENSRNOG00000018994;ENSRNOG00000021042;ENSRNOG00000028103;ENSRNOG00000052730;ENSRNOG00000055984;ENSRNOG00000056853
Cellular Processes	Transport and catabolism	Phagosome	ko04145	25	0.018348	ENSRNOG00000000164;ENSRNOG00000000723;ENSRNOG00000000981;ENSRNOG00000001068;ENSRNOG00000001795;ENSRNOG00000003269;ENSRNOG00000007392;ENSRNOG00000008218;ENSRNOG00000008373;ENSRNOG00000011706;ENSRNOG00000011891;ENSRNOG00000012247;ENSRNOG00000017209;ENSRNOG00000017235;ENSRNOG00000017558;ENSRNOG00000018568;ENSRNOG00000021157;ENSRNOG00000021438;ENSRNOG00000030712;ENSRNOG00000032708;ENSRNOG00000038999;…				25	0.0108479	ENSRNOG00000000981;ENSRNOG00000003597;ENSRNOG00000006178;ENSRNOG00000008163;ENSRNOG00000009700;ENSRNOG00000009781;ENSRNOG00000010170;ENSRNOG00000011891;ENSRNOG00000017209;ENSRNOG00000018371;ENSRNOG00000023278;ENSRNOG00000030712;ENSRNOG00000030862;ENSRNOG00000031090;ENSRNOG00000032708;ENSRNOG00000032844;ENSRNOG00000033215;ENSRNOG00000036696;ENSRNOG00000038999;ENSRNOG00000039744;ENSRNOG00000040108;…
Genetic Information Processing	Transcription	Spliceosome	ko03040				23	0.0132142	ENSRNOG00000000841;ENSRNOG00000000988;ENSRNOG00000000989;ENSRNOG00000003822;ENSRNOG00000005513;ENSRNOG00000006655;ENSRNOG00000007766;ENSRNOG00000009156;ENSRNOG00000013516;ENSRNOG00000016016;ENSRNOG00000018783;ENSRNOG00000020763;ENSRNOG00000021181;ENSRNOG00000021637;ENSRNOG00000030680;ENSRNOG00000032232;ENSRNOG00000034066;ENSRNOG00000036687;ENSRNOG00000045791;ENSRNOG00000045860;ENSRNOG00000049593;…	18	0.0489164	ENSRNOG00000000988;ENSRNOG00000000989;ENSRNOG00000003495;ENSRNOG00000005513;ENSRNOG00000006961;ENSRNOG00000007766;ENSRNOG00000007992;ENSRNOG00000018783;ENSRNOG00000019113;ENSRNOG00000020763;ENSRNOG00000020897;ENSRNOG00000021637;ENSRNOG00000034066;ENSRNOG00000042126;ENSRNOG00000045791;ENSRNOG00000050800;ENSRNOG00000052968;ENSRNOG00000058677
Environmental Information Processing	Signal transduction	HIF-1 signaling pathway	ko04066				18	0.0337347	ENSRNOG00000000521;ENSRNOG00000001214;ENSRNOG00000001414;ENSRNOG00000001517;ENSRNOG00000004814;ENSRNOG00000007249;ENSRNOG00000007895;ENSRNOG00000010381;ENSRNOG00000014117;ENSRNOG00000014187;ENSRNOG00000017895;ENSRNOG00000019598;ENSRNOG00000019634;ENSRNOG00000029028;ENSRNOG00000030625;ENSRNOG00000031730;ENSRNOG00000052802;ENSRNOG00000058249	18	0.0108479	ENSRNOG00000000521;ENSRNOG00000004517;ENSRNOG00000004814;ENSRNOG00000007895;ENSRNOG00000008292;ENSRNOG00000010381;ENSRNOG00000012582;ENSRNOG00000013009;ENSRNOG00000014117;ENSRNOG00000014187;ENSRNOG00000018630;ENSRNOG00000019598;ENSRNOG00000019634;ENSRNOG00000019742;ENSRNOG00000023258;ENSRNOG00000029028;ENSRNOG00000030625;ENSRNOG00000051490
Organismal Systems	Endocrine system	Cortisol synthesis and secretion	ko04927				13	0.0349035	ENSRNOG00000000428;ENSRNOG00000000981;ENSRNOG00000004693;ENSRNOG00000005413;ENSRNOG00000007607;ENSRNOG00000008074;ENSRNOG00000009946;ENSRNOG00000015052;ENSRNOG00000017801;ENSRNOG00000021524;ENSRNOG00000025889;ENSRNOG00000042884;ENSRNOG00000054757	12	0.0313264	ENSRNOG00000000428;ENSRNOG00000000981;ENSRNOG00000004693;ENSRNOG00000005257;ENSRNOG00000005413;ENSRNOG00000007607;ENSRNOG00000008074;ENSRNOG00000009946;ENSRNOG00000012682;ENSRNOG00000016681;ENSRNOG00000017801;ENSRNOG00000021524
Human Diseases	Cancers	Transcriptional misregulation in cancers	ko05202				30	0.0081298	ENSRNOG00000000521;ENSRNOG00000001312;ENSRNOG00000001843;ENSRNOG00000002232;ENSRNOG00000003220;ENSRNOG00000003229;ENSRNOG00000004693;ENSRNOG00000005392;ENSRNOG00000005615;ENSRNOG00000005964;ENSRNOG00000005984;ENSRNOG00000006789;ENSRNOG00000007237;ENSRNOG00000007249;ENSRNOG00000009437;ENSRNOG00000009568;ENSRNOG00000013017;ENSRNOG00000013090;ENSRNOG00000014187;ENSRNOG00000015133;ENSRNOG00000015380;…	24	0.0313264	ENSRNOG00000000521;ENSRNOG00000000648;ENSRNOG00000001843;ENSRNOG00000002040;ENSRNOG00000002232;ENSRNOG00000003229;ENSRNOG00000004500;ENSRNOG00000004517;ENSRNOG00000004693;ENSRNOG00000005615;ENSRNOG00000005964;ENSRNOG00000006789;ENSRNOG00000007237;ENSRNOG00000009437;ENSRNOG00000013090;ENSRNOG00000014187;ENSRNOG00000015133;ENSRNOG00000017113;ENSRNOG00000019018;ENSRNOG00000019822;ENSRNOG00000022586;…
Metabolism	Carbohydrate metabolism	Glycolysis / Gluconeogenesis	ko00010	12	0.0328974	ENSRNOG00000002342;ENSRNOG00000006807;ENSRNOG00000010133;ENSRNOG00000011287;ENSRNOG00000013009;ENSRNOG00000018755;ENSRNOG00000020902;ENSRNOG00000028616;ENSRNOG00000032959;ENSRNOG00000051171;ENSRNOG00000052802;ENSRNOG00000058249
Metabolism	Carbohydrate metabolism	Ascorbate and aldarate metabolism	ko00053	6	0.00819154	ENSRNOG00000001980;ENSRNOG00000001990;ENSRNOG00000002342;ENSRNOG00000002643;ENSRNOG00000007949;ENSRNOG00000046540
Metabolism	Lipid metabolism	Fatty acid degradation	ko00071	12	0.00208795	ENSRNOG00000001177;ENSRNOG00000002342;ENSRNOG00000007862;ENSRNOG00000009741;ENSRNOG00000010697;ENSRNOG00000010800;ENSRNOG00000014254;ENSRNOG00000016265;ENSRNOG00000019189;ENSRNOG00000029549;ENSRNOG00000032908;ENSRNOG00000032959
Metabolism	Lipid metabolism	Synthesis and degradation of ketone bodies	ko00072	6	0.000404621	ENSRNOG00000001736;ENSRNOG00000007862;ENSRNOG00000014490;ENSRNOG00000016552;ENSRNOG00000019120;ENSRNOG00000019189
Metabolism	Lipid metabolism	Steroid hormone biosynthesis	ko00140	13	0.0107929	ENSRNOG00000001889;ENSRNOG00000001980;ENSRNOG00000001990;ENSRNOG00000009488;ENSRNOG00000020775;ENSRNOG00000021405;ENSRNOG00000024016;ENSRNOG00000029179;ENSRNOG00000032487;ENSRNOG00000033164;ENSRNOG00000042884;ENSRNOG00000046540;ENSRNOG00000047945
Metabolism	Amino acid metabolism	Glycine, serine and threonine metabolism	ko00260	12	0.000916711	ENSRNOG00000001391;ENSRNOG00000008798;ENSRNOG00000010133;ENSRNOG00000010658;ENSRNOG00000011200;ENSRNOG00000023856;ENSRNOG00000029778;ENSRNOG00000046307;ENSRNOG00000050214;ENSRNOG00000054962;ENSRNOG00000055408;ENSRNOG00000056596
Metabolism	Amino acid metabolism	Valine, leucine and isoleucine degradation	ko00280	20	2.15289e-07	ENSRNOG00000000967;ENSRNOG00000001177;ENSRNOG00000002342;ENSRNOG00000002636;ENSRNOG00000003049;ENSRNOG00000007862;ENSRNOG00000009421;ENSRNOG00000009928;ENSRNOG00000010697;ENSRNOG00000010800;ENSRNOG00000015514;ENSRNOG00000015869;ENSRNOG00000016552;ENSRNOG00000017752;ENSRNOG00000019120;ENSRNOG00000019189;ENSRNOG00000020607;ENSRNOG00000028557;ENSRNOG00000032908;ENSRNOG00000048164
Metabolism	Amino acid metabolism	Arginine and proline metabolism	ko00330	10	0.0386879	ENSRNOG00000002342;ENSRNOG00000003289;ENSRNOG00000003809;ENSRNOG00000005424;ENSRNOG00000010872;ENSRNOG00000013304;ENSRNOG00000014573;ENSRNOG00000015591;ENSRNOG00000029778;ENSRNOG00000054962
Metabolism	Metabolism of other amino acids	Glutathione metabolism	ko00480	12	0.0328974	ENSRNOG00000000201;ENSRNOG00000003289;ENSRNOG00000004245;ENSRNOG00000005424;ENSRNOG00000006302;ENSRNOG00000007743;ENSRNOG00000013484;ENSRNOG00000014915;ENSRNOG00000015020;ENSRNOG00000049771;ENSRNOG00000052564;ENSRNOG00000061857
Metabolism	Carbohydrate metabolism	Pyruvate metabolism	ko00620	12	0.000404621	ENSRNOG00000000541;ENSRNOG00000000658;ENSRNOG00000001440;ENSRNOG00000002342;ENSRNOG00000007862;ENSRNOG00000009715;ENSRNOG00000013009;ENSRNOG00000018755;ENSRNOG00000019189;ENSRNOG00000019372;ENSRNOG00000028616;ENSRNOG00000034013
Metabolism	Carbohydrate metabolism	Propanoate metabolism	ko00640	16	4.89952e-08	ENSRNOG00000000658;ENSRNOG00000002636;ENSRNOG00000004448;ENSRNOG00000005686;ENSRNOG00000007862;ENSRNOG00000009928;ENSRNOG00000011622;ENSRNOG00000013009;ENSRNOG00000014522;ENSRNOG00000015869;ENSRNOG00000017481;ENSRNOG00000018755;ENSRNOG00000019189;ENSRNOG00000020607;ENSRNOG00000028557;ENSRNOG00000034013
Metabolism	Carbohydrate metabolism	Butanoate metabolism	ko00650	11	8.00008e-05	ENSRNOG00000000967;ENSRNOG00000001177;ENSRNOG00000001736;ENSRNOG00000002636;ENSRNOG00000007862;ENSRNOG00000010697;ENSRNOG00000014490;ENSRNOG00000016552;ENSRNOG00000019120;ENSRNOG00000019189;ENSRNOG00000042084
Metabolism	Metabolism of cofactors and vitamins	Retinol metabolism	ko00830	13	0.0152302	ENSRNOG00000001980;ENSRNOG00000001990;ENSRNOG00000006681;ENSRNOG00000009741;ENSRNOG00000020775;ENSRNOG00000020817;ENSRNOG00000021405;ENSRNOG00000024016;ENSRNOG00000028711;ENSRNOG00000032959;ENSRNOG00000033164;ENSRNOG00000046540;ENSRNOG00000047945
Metabolism	Metabolism of cofactors and vitamins	Porphyrin and chlorophyll metabolism	ko00860	7	0.0493818	ENSRNOG00000001980;ENSRNOG00000001990;ENSRNOG00000002393;ENSRNOG00000003773;ENSRNOG00000011778;ENSRNOG00000046540;ENSRNOG00000056596
Metabolism	Metabolism of terpenoids and polyketides	Terpenoid backbone biosynthesis	ko00900	9	0.000404621	ENSRNOG00000000411;ENSRNOG00000007862;ENSRNOG00000013376;ENSRNOG00000016552;ENSRNOG00000016767;ENSRNOG00000019120;ENSRNOG00000019189;ENSRNOG00000020696;ENSRNOG00000049604
Metabolism	Energy metabolism	Sulfur metabolism	ko00920	4	0.0417928	ENSRNOG00000000172;ENSRNOG00000000185;ENSRNOG00000002378;ENSRNOG00000005987
Metabolism	Xenobiotics biodegradation and metabolism	Metabolism of xenobiotics by cytochrome P450	ko00980	12	0.0125769	ENSRNOG00000000201;ENSRNOG00000001980;ENSRNOG00000001990;ENSRNOG00000003515;ENSRNOG00000004245;ENSRNOG00000007743;ENSRNOG00000013484;ENSRNOG00000017780;ENSRNOG00000032959;ENSRNOG00000046540;ENSRNOG00000049771;ENSRNOG00000061857
Metabolism	Xenobiotics biodegradation and metabolism	Drug metabolism - cytochrome P450	ko00982	12	0.0125769	ENSRNOG00000000201;ENSRNOG00000001980;ENSRNOG00000001990;ENSRNOG00000004245;ENSRNOG00000007743;ENSRNOG00000013484;ENSRNOG00000018076;ENSRNOG00000029778;ENSRNOG00000032959;ENSRNOG00000046540;ENSRNOG00000049771;ENSRNOG00000061857
Metabolism	Xenobiotics biodegradation and metabolism	Drug metabolism - other enzymes	ko00983	15	0.00763018	ENSRNOG00000000201;ENSRNOG00000001980;ENSRNOG00000001990;ENSRNOG00000004245;ENSRNOG00000007743;ENSRNOG00000007775;ENSRNOG00000011330;ENSRNOG00000013484;ENSRNOG00000015438;ENSRNOG00000015519;ENSRNOG00000021233;ENSRNOG00000046540;ENSRNOG00000049771;ENSRNOG00000051151;ENSRNOG00000061857
Organismal Systems	Endocrine system	PPAR signaling pathway	ko03320	19	0.00033078	ENSRNOG00000003500;ENSRNOG00000006675;ENSRNOG00000009446;ENSRNOG00000009488;ENSRNOG00000009715;ENSRNOG00000009741;ENSRNOG00000010128;ENSRNOG00000013172;ENSRNOG00000014254;ENSRNOG00000016265;ENSRNOG00000019120;ENSRNOG00000020440;ENSRNOG00000028616;ENSRNOG00000032908;ENSRNOG00000034116;ENSRNOG00000040108;ENSRNOG00000046889;ENSRNOG00000047503;ENSRNOG00000057823
Cellular Processes	Transport and catabolism	Peroxisome	ko04146	20	0.00033078	ENSRNOG00000002115;ENSRNOG00000006779;ENSRNOG00000007395;ENSRNOG00000008798;ENSRNOG00000010128;ENSRNOG00000013498;ENSRNOG00000014522;ENSRNOG00000015020;ENSRNOG00000016265;ENSRNOG00000017194;ENSRNOG00000018145;ENSRNOG00000018838;ENSRNOG00000019630;ENSRNOG00000020696;ENSRNOG00000021125;ENSRNOG00000023856;ENSRNOG00000029549;ENSRNOG00000032908;ENSRNOG00000049604;ENSRNOG00000054962
Environmental Information Processing	Signal transduction	AMPK signaling pathway	ko04152	20	0.0171258	ENSRNOG00000000165;ENSRNOG00000000658;ENSRNOG00000001142;ENSRNOG00000004143;ENSRNOG00000004517;ENSRNOG00000005413;ENSRNOG00000007990;ENSRNOG00000008895;ENSRNOG00000011282;ENSRNOG00000012582;ENSRNOG00000014254;ENSRNOG00000014522;ENSRNOG00000014621;ENSRNOG00000020902;ENSRNOG00000028616;ENSRNOG00000032202;ENSRNOG00000034013;ENSRNOG00000040108;ENSRNOG00000045636;ENSRNOG00000051171
Organismal Systems	Immune system	Complement and coagulation cascades	ko04610	14	0.0357219	ENSRNOG00000002783;ENSRNOG00000003233;ENSRNOG00000003430;ENSRNOG00000007092;ENSRNOG00000011258;ENSRNOG00000011706;ENSRNOG00000012613;ENSRNOG00000015139;ENSRNOG00000016460;ENSRNOG00000024115;ENSRNOG00000025074;ENSRNOG00000048723;ENSRNOG00000051235;ENSRNOG00000057855
Organismal Systems	Endocrine system	Adipocytokine signaling pathway	ko04920	13	0.0282634	ENSRNOG00000000658;ENSRNOG00000001142;ENSRNOG00000004143;ENSRNOG00000007390;ENSRNOG00000007990;ENSRNOG00000009446;ENSRNOG00000009768;ENSRNOG00000014254;ENSRNOG00000016265;ENSRNOG00000020902;ENSRNOG00000028616;ENSRNOG00000040108;ENSRNOG00000051171
Organismal Systems	Endocrine system	Glucagon signaling pathway	ko04922	17	0.0101434	ENSRNOG00000000165;ENSRNOG00000000658;ENSRNOG00000001142;ENSRNOG00000001189;ENSRNOG00000004060;ENSRNOG00000005413;ENSRNOG00000013009;ENSRNOG00000014254;ENSRNOG00000016770;ENSRNOG00000017801;ENSRNOG00000019813;ENSRNOG00000020902;ENSRNOG00000025889;ENSRNOG00000028616;ENSRNOG00000032202;ENSRNOG00000034013;ENSRNOG00000051171
Human Diseases	Endocrine and metabolic diseases	Insulin resistance	ko04931	17	0.0328974	ENSRNOG00000000658;ENSRNOG00000001142;ENSRNOG00000001269;ENSRNOG00000005413;ENSRNOG00000007390;ENSRNOG00000010128;ENSRNOG00000011474;ENSRNOG00000013172;ENSRNOG00000014254;ENSRNOG00000018457;ENSRNOG00000018708;ENSRNOG00000019977;ENSRNOG00000020902;ENSRNOG00000028616;ENSRNOG00000032202;ENSRNOG00000040108;ENSRNOG00000051171
Human Diseases	Endocrine and metabolic diseases	Non-alcoholic fatty liver disease (NAFLD)	ko04932	27	0.00149438	ENSRNOG00000001068;ENSRNOG00000001142;ENSRNOG00000002721;ENSRNOG00000003163;ENSRNOG00000004143;ENSRNOG00000004526;ENSRNOG00000006939;ENSRNOG00000007407;ENSRNOG00000007990;ENSRNOG00000009446;ENSRNOG00000010298;ENSRNOG00000010807;ENSRNOG00000011849;ENSRNOG00000013172;ENSRNOG00000014078;ENSRNOG00000017571;ENSRNOG00000017801;ENSRNOG00000020602;ENSRNOG00000020811;ENSRNOG00000021177;ENSRNOG00000026616;…
Organismal Systems	Digestive system	Cholesterol metabolism	ko04979	11	0.0150117	ENSRNOG00000000981;ENSRNOG00000003500;ENSRNOG00000009488;ENSRNOG00000018426;ENSRNOG00000018454;ENSRNOG00000019277;ENSRNOG00000019573;ENSRNOG00000040108;ENSRNOG00000042044;ENSRNOG00000047503;ENSRNOG00000050860
Human Diseases	Neurodegenerative diseases	Alzheimer disease	ko05010	32	0.00033078	ENSRNOG00000002721;ENSRNOG00000003049;ENSRNOG00000003163;ENSRNOG00000004060;ENSRNOG00000004526;ENSRNOG00000004621;ENSRNOG00000006939;ENSRNOG00000006997;ENSRNOG00000007407;ENSRNOG00000010807;ENSRNOG00000011849;ENSRNOG00000012944;ENSRNOG00000014078;ENSRNOG00000015320;ENSRNOG00000016770;ENSRNOG00000016833;ENSRNOG00000017032;ENSRNOG00000017571;ENSRNOG00000018454;ENSRNOG00000020602;ENSRNOG00000020941;…
Human Diseases	Neurodegenerative diseases	Huntington disease	ko05016	30	0.00397779	ENSRNOG00000002115;ENSRNOG00000002721;ENSRNOG00000003163;ENSRNOG00000004291;ENSRNOG00000004526;ENSRNOG00000005413;ENSRNOG00000006939;ENSRNOG00000007407;ENSRNOG00000010558;ENSRNOG00000010807;ENSRNOG00000011849;ENSRNOG00000012944;ENSRNOG00000014078;ENSRNOG00000015320;ENSRNOG00000015583;ENSRNOG00000017032;ENSRNOG00000017571;ENSRNOG00000019277;ENSRNOG00000020602;ENSRNOG00000021177;ENSRNOG00000026616;…
Human Diseases	Substance dependence	Amphetamine addiction	ko05031	12	0.0398857	ENSRNOG00000001269;ENSRNOG00000004060;ENSRNOG00000004327;ENSRNOG00000005413;ENSRNOG00000011992;ENSRNOG00000016770;ENSRNOG00000017801;ENSRNOG00000018708;ENSRNOG00000020410;ENSRNOG00000025889;ENSRNOG00000029778;ENSRNOG00000032202
Human Diseases	Cancers	Chemical carcinogenesis	ko05204	17	0.000990696	ENSRNOG00000000201;ENSRNOG00000001980;ENSRNOG00000001990;ENSRNOG00000003515;ENSRNOG00000004245;ENSRNOG00000007743;ENSRNOG00000013484;ENSRNOG00000016097;ENSRNOG00000020775;ENSRNOG00000021405;ENSRNOG00000024016;ENSRNOG00000032959;ENSRNOG00000033164;ENSRNOG00000046540;ENSRNOG00000047945;ENSRNOG00000049771;ENSRNOG00000061857
Metabolism	Global and overview maps	2-Oxocarboxylic acid metabolism				ko01210	6	0.0427882	ENSRNOG00000005849;ENSRNOG00000015514;ENSRNOG00000016356;ENSRNOG00000023520;ENSRNOG00000033915;ENSRNOG00000059579
Organismal Systems	Immune system	Antigen processing and presentation				ko04612	16	0.0132142	ENSRNOG00000010331;ENSRNOG00000010735;ENSRNOG00000015018;ENSRNOG00000016596;ENSRNOG00000018294;ENSRNOG00000019041;ENSRNOG00000019834;ENSRNOG00000031090;ENSRNOG00000032708;ENSRNOG00000034066;ENSRNOG00000038999;ENSRNOG00000039744;ENSRNOG00000050183;ENSRNOG00000050210;ENSRNOG00000056028;ENSRNOG00000059714
Organismal Systems	Endocrine system	Aldosterone synthesis and secretion				ko04925	17	0.0337347	ENSRNOG00000000428;ENSRNOG00000000981;ENSRNOG00000002934;ENSRNOG00000005413;ENSRNOG00000005600;ENSRNOG00000007607;ENSRNOG00000008074;ENSRNOG00000009946;ENSRNOG00000011501;ENSRNOG00000015052;ENSRNOG00000016770;ENSRNOG00000017801;ENSRNOG00000020546;ENSRNOG00000025889;ENSRNOG00000030019;ENSRNOG00000042884;ENSRNOG00000054757
Human Diseases	Cardiovascular diseases	Fluid shear stress and atherosclerosis				ko05418	24	0.0239875	ENSRNOG00000001068;ENSRNOG00000001312;ENSRNOG00000003147;ENSRNOG00000003977;ENSRNOG00000004936;ENSRNOG00000007743;ENSRNOG00000008015;ENSRNOG00000008837;ENSRNOG00000013484;ENSRNOG00000014117;ENSRNOG00000014205;ENSRNOG00000016770;ENSRNOG00000017197;ENSRNOG00000019018;ENSRNOG00000019598;ENSRNOG00000019834;ENSRNOG00000020679;ENSRNOG00000030449;ENSRNOG00000046829;ENSRNOG00000049771;ENSRNOG00000050519;…
Metabolism	Lipid metabolism	Fatty acid biosynthesis								5	0.0351241	ENSRNOG00000005993;ENSRNOG00000010633;ENSRNOG00000016403;ENSRNOG00000019180;ENSRNOG00000045636
Environmental Information Processing	Signal transduction	FoxO signaling pathway								18	0.0351241	ENSRNOG00000000521;ENSRNOG00000001843;ENSRNOG00000004517;ENSRNOG00000005615;ENSRNOG00000010838;ENSRNOG00000013090;ENSRNOG00000013269;ENSRNOG00000014187;ENSRNOG00000014287;ENSRNOG00000018484;ENSRNOG00000019742;ENSRNOG00000019822;ENSRNOG00000020723;ENSRNOG00000023509;ENSRNOG00000028616;ENSRNOG00000032639;ENSRNOG00000047014;ENSRNOG00000053362
Environmental Information Processing	Signal transduction	mTOR signaling pathway								21	0.0351039	ENSRNOG00000004328;ENSRNOG00000004517;ENSRNOG00000006338;ENSRNOG00000008163;ENSRNOG00000011341;ENSRNOG00000011891;ENSRNOG00000012582;ENSRNOG00000014187;ENSRNOG00000014287;ENSRNOG00000015911;ENSRNOG00000018186;ENSRNOG00000018487;ENSRNOG00000019634;ENSRNOG00000020723;ENSRNOG00000030862;ENSRNOG00000042411;ENSRNOG00000050519;ENSRNOG00000050578;ENSRNOG00000057078;ENSRNOG00000059244;ENSRNOG00000061031
Cellular Processes	Cell growth and death	Cellular senescence								23	0.0313264	ENSRNOG00000000521;ENSRNOG00000001269;ENSRNOG00000003147;ENSRNOG00000004500;ENSRNOG00000004726;ENSRNOG00000005615;ENSRNOG00000012582;ENSRNOG00000013090;ENSRNOG00000018708;ENSRNOG00000018729;ENSRNOG00000019822;ENSRNOG00000020723;ENSRNOG00000020929;ENSRNOG00000023258;ENSRNOG00000030712;ENSRNOG00000031090;ENSRNOG00000038202;ENSRNOG00000038999;ENSRNOG00000039744;ENSRNOG00000050210;ENSRNOG00000050578;…
Cellular Processes	Cellular community - eukaryotes	Adherens junction								12	0.0492507	ENSRNOG00000000847;ENSRNOG00000004049;ENSRNOG00000005796;ENSRNOG00000006975;ENSRNOG00000010121;ENSRNOG00000010574;ENSRNOG00000014187;ENSRNOG00000018730;ENSRNOG00000020433;ENSRNOG00000030790;ENSRNOG00000050519;ENSRNOG00000054172
Organismal Systems	Environmental adaptation	Circadian rhythm								7	0.0481063	ENSRNOG00000007478;ENSRNOG00000013408;ENSRNOG00000013413;ENSRNOG00000014448;ENSRNOG00000027145;ENSRNOG00000048961;ENSRNOG00000059334
Human Diseases	Infectious diseases	Herpes simplex infection								26	0.0263889	ENSRNOG00000000477;ENSRNOG00000000511;ENSRNOG00000000847;ENSRNOG00000001269;ENSRNOG00000001478;ENSRNOG00000005513;ENSRNOG00000013023;ENSRNOG00000014079;ENSRNOG00000014448;ENSRNOG00000018708;ENSRNOG00000018730;ENSRNOG00000019050;ENSRNOG00000019069;ENSRNOG00000019113;ENSRNOG00000023258;ENSRNOG00000028834;ENSRNOG00000030712;ENSRNOG00000031081;ENSRNOG00000031090;ENSRNOG00000032708;ENSRNOG00000032844;…
Human Diseases	Infectious diseases	Epstein-Barr virus infection								27	0.0263889	ENSRNOG00000000521;ENSRNOG00000000847;ENSRNOG00000000938;ENSRNOG00000001719;ENSRNOG00000004500;ENSRNOG00000005257;ENSRNOG00000005538;ENSRNOG00000006751;ENSRNOG00000009935;ENSRNOG00000010038;ENSRNOG00000011414;ENSRNOG00000018994;ENSRNOG00000019742;ENSRNOG00000021042;ENSRNOG00000023258;ENSRNOG00000023546;ENSRNOG00000028103;ENSRNOG00000028834;ENSRNOG00000030712;ENSRNOG00000031090;ENSRNOG00000034066;…
Human Diseases	Cancers	Endometrial cancer								11	0.0351039	ENSRNOG00000000521;ENSRNOG00000004500;ENSRNOG00000005615;ENSRNOG00000005796;ENSRNOG00000010121;ENSRNOG00000010838;ENSRNOG00000012944;ENSRNOG00000013090;ENSRNOG00000019822;ENSRNOG00000020723;ENSRNOG00000054172
Human Diseases	Cancers	Prostate cancer								15	0.0351241	ENSRNOG00000000521;ENSRNOG00000004517;ENSRNOG00000005413;ENSRNOG00000010121;ENSRNOG00000010838;ENSRNOG00000012944;ENSRNOG00000014187;ENSRNOG00000016374;ENSRNOG00000017801;ENSRNOG00000019018;ENSRNOG00000019834;ENSRNOG00000020723;ENSRNOG00000023258;ENSRNOG00000054172;ENSRNOG00000059714
