# Supplementary material for: Identification of Novel Mrna Isoforms Associated with Acute Heat Stress Response Using RNA-Sequencing Data in The Sprague-Dawley Rats
Source: Preprints.org preprint supplement (doi:10.20944/preprints202211.0380.v1), 2022-11-21
Supplement: Supplementary file 9 [file Table S9_all DEIDEGs.xlsx]

## Sheet: Blood_CT_vs_H120
Summary of DEIDEGs identified in blood at CT vs. H120.
Feature ID	Gene name	Position	P-value	Fold change
ENSRNOG00000036701	Actg1	10:109519133-109520846	5.78951e-05	39.7047
ENSRNOG00000005825	Lyz2	7:60335968-60341264	0.000119369	-3.9432
ENSRNOG00000027990	Crip1	6:137959170-137967042	0.000191923	-3.67495
ENSRNOG00000031315	Rpl36al	10:57251252-57251573	0.000211475	106.367
ENSRNOG00000050108	LOC100911319	7:2351932-2353875	0.000552362	13.8551
ENSRNOG00000011647	S100a6	2:190007215-190008511	0.000670287	-6.14298
ENSRNOG00000017117	Ybx2	10:56546709-56551863	0.000835397	4.57572
ENSRNOG00000015753	Epn1	1:72294152-72311856	0.00106514	2.81817
ENSRNOG00000000451	RT1-Ba	20:4066131-4070721	0.00108026	-4.15779
ENSRNOG00000009342	Fcnb	3:6617750-6626284	0.00110264	-7.48825
ENSRNOG00000058555	7SK	8:85480291-85480622	0.00183883	31.3749
ENSRNOG00000032844	RT1-Da	20:4127643-4132616	0.00249764	-3.74202
ENSRNOG00000027767	Slc38a5	X:14963920-14972675	0.00542675	3.67967
ENSRNOG00000047854	RT1-DMa	20:3935528-3938915	0.00560202	-6.75026
ENSRNOG00000058083	Metazoa_SRP	6:91680228-91680528	0.00647779	9.44611
ENSRNOG00000050655	P4ha1	20:28920615-28971966	0.00689091	12.1946
ENSRNOG00000061096	Rn7sl1	6:91456907-91457207	0.009549	13.8308
ENSRNOG00000024689	Hopx	14:33354806-33362551	0.00969193	-4.74588
ENSRNOG00000020845	Tyrobp	1:88875374-88879303	0.0109061	-2.2002
ENSRNOG00000000851	Bag6	20:5125348-5138084	0.0127941	2.95798
ENSRNOG00000018087	Vim	17:80882665-80891212	0.0134304	-2.35945
ENSRNOG00000002946	Socs3	10:106975177-106976040	0.0138328	4.88487
ENSRNOG00000031090	RT1-CE7	20:4694471-4896970	0.0140051	2.3135
ENSRNOG00000011821	S100a4	2:189997128-189999604	0.0140457	-2.63195
ENSRNOG00000019568	Jund	16:20485028-20486707	0.01597	2.66751
ENSRNOG00000052219	Gm2a	10:40438355-40450930	0.0171076	-3.47544
ENSRNOG00000003895	Rgs1	13:61066152-61070599	0.0183703	3.28289
ENSRNOG00000059900	Bst2	16:19938783-19942353	0.0190049	3.35219
ENSRNOG00000011557	S100a8	2:190073814-190074354	0.0194585	-2.67533
ENSRNOG00000032708	RT1-Bb	20:4039412-4049711	0.0216285	-3.66874
ENSRNOG00000033215	RT1-Db1	20:4087617-4097190	0.0243805	-2.72893
ENSRNOG00000042838	Junb	19:26092973-26094756	0.0312536	2.32144
ENSRNOG00000031540	LOC100362384	13:89253616-89254171	0.0324963	5.09959
ENSRNOG00000025040	Gng10	5:76182120-76189013	0.035524	-2.67597
ENSRNOG00000020349	Rab3il1	1:226077119-226084830	0.0359384	4.15909
ENSRNOG00000000562	Prf1	20:30915212-30921382	0.0385136	2.86155
ENSRNOG00000004662	AC115277.1	7:15385867-15386419	0.0396682	4.56169
ENSRNOG00000017645	Mylpf	1:198655741-198658583	0.0412404	6.73377
ENSRNOG00000019090	Cct3	2:187668795-187693610	0.0415326	2.21599
ENSRNOG00000059538	Clec2g	4:162934194-162943981	0.043327	-3.23172
ENSRNOG00000026643	Chordc1	8:17421556-17446165	0.0469811	4.01764
ENSRNOG00000032401	H3f3c	7:94777701-94778696	0.0494786	-2.31185
ENSRNOG00000026653	Hcar2	12:38160463-38161546	0.0495512	5.20188

## Sheet: Liver_CT_vs_H30
Summary of DEIDEGs identified in liver at CT vs. H30.
Feature ID	Gene name	Position	P-value	Fold change	FDR
ENSRNOG00000028505	Rps18	20:5441875-5445553	0	-2.11517	0
ENSRNOG00000031053	Mt-nd4l	MT:9869-10166	1.13421e-37	9.73826	1.86482e-33
ENSRNOG00000001049	Tpt1	15:57891679-57894504	4.7728e-28	2.32801	3.9236e-24
ENSRNOG00000033024	AC099453.1	5:78392714-78393143	6.34363e-25	-6.40119	3.47662e-21
ENSRNOG00000029971	Mt-nd5	MT:11735-13565	2.98354e-22	5.01746	1.22635e-18
ENSRNOG00000021027	Dbp	1:101687854-101692846	4.38483e-21	-20.5487	1.60207e-17
ENSRNOG00000009057	Sec62	2:116189861-116219750	3.16275e-19	-3.77134	1.04001e-15
ENSRNOG00000010658	LOC103691744	2:264266983-264293046	4.18951e-19	4.34638	1.14803e-15
ENSRNOG00000002947	Dpt	13:83073543-83102401	5.55535e-19	-2.90809	1.4052e-15
ENSRNOG00000016220	Rpl12	3:12009577-12011666	1.77061e-18	2.80207	3.88153e-15
ENSRNOG00000016791	Chka	1:219077770-219126220	2.55308e-16	6.05296	4.19764e-13
ENSRNOG00000031033	Mt-nd2	MT:3903-4942	4.31486e-16	4.92196	6.75646e-13
ENSRNOG00000018755	Acss2	3:151032951-151075856	7.03137e-16	-2.84706	1.05097e-12
ENSRNOG00000053210	Zc3h11a	13:50196041-50234862	3.13112e-15	5.11585	4.29003e-12
ENSRNOG00000037673	AABR07071891.1	1:84573495-84573959	7.13345e-15	-3.25555	9.38277e-12
ENSRNOG00000002520	Litaf	10:4719712-4763510	1.70272e-14	5.10139	2.15348e-11
ENSRNOG00000002896	Prdx6	13:79077032-79088127	3.95921e-14	-2.08186	4.64967e-11
ENSRNOG00000019189	Acat2	1:47972398-47992653	5.86925e-14	-4.46179	6.53755e-11
ENSRNOG00000049075	Fabp5	2:93981655-93985378	5.96437e-14	-4.56552	6.53755e-11
ENSRNOG00000028690	LOC100362366	3:24600602-24601063	7.00428e-14	-2.96468	7.42973e-11
ENSRNOG00000008921	Dynll2	10:75262536-75270561	1.00333e-13	-2.20384	1.03102e-10
ENSRNOG00000000443	LOC103689965	20:4302346-4508214	1.43851e-13	-3.00822	1.43341e-10
ENSRNOG00000009875	Akr1b7	4:61850347-61862526	7.68589e-13	3.02153	6.58825e-10
ENSRNOG00000020775	Cyp2b2	1:83103924-83119193	7.81382e-13	-6.73597	6.58825e-10
ENSRNOG00000050547	Syngr2	10:106812738-106816675	9.50631e-13	-4.06907	7.8149e-10
ENSRNOG00000030712	RT1-A2	20:5374984-5378539	3.11693e-12	-2.71433	2.38358e-09
ENSRNOG00000050761	LOC100909524	6:127500015-127508452	4.86042e-12	-6.34693	3.4792e-09
ENSRNOG00000059593	Cetn2	X:152927717-152932953	4.97285e-12	-3.28619	3.4792e-09
ENSRNOG00000028382	Rfxapl1	2:144213402-144217600	6.02512e-12	64.6019	4.06011e-09
ENSRNOG00000049394	LOC679739	1:32573227-32581781	6.0501e-12	-2.50246	4.06011e-09
ENSRNOG00000016099	Id4	17:16692556-16695126	6.18087e-12	3.60393	4.06491e-09
ENSRNOG00000023150	Gpi	1:90063410-90091287	7.55252e-12	-2.94316	4.78101e-09
ENSRNOG00000011330	Ces2a	19:59196-64303	8.54978e-12	-3.74334	5.30457e-09
ENSRNOG00000023387	LOC100912599	1:31264754-31273159	1.47468e-11	-2.47094	8.50737e-09
ENSRNOG00000005542	Apob	6:33176777-33224997	2.02477e-11	2.33758	1.10968e-08
ENSRNOG00000000184	Tmprss6	7:119659323-119689938	2.60406e-11	-2.39493	1.40376e-08
ENSRNOG00000004196	LOC108352650	6:91455332-91456696	3.69424e-11	-2.59351	1.95932e-08
ENSRNOG00000047158	Selenbp1	2:195416468-195423787	4.35883e-11	-2.21532	2.2751e-08
ENSRNOG00000016166	Pdlim1	1:259308295-259357056	1.51686e-10	-2.82462	7.33515e-08
ENSRNOG00000008414	Bsg	7:12875536-12882753	1.55291e-10	-2.11015	7.40064e-08
ENSRNOG00000006539	Pex16	3:81283136-81292573	1.98965e-10	-2.4368	9.2149e-08
ENSRNOG00000050445	Gde1	1:188394813-188407132	2.70749e-10	-3.88062	1.21959e-07
ENSRNOG00000047565	Echs1	1:141821915-141830764	3.27481e-10	-6.23475	1.43581e-07
ENSRNOG00000006787	Dhcr24	5:126164673-126191206	3.73518e-10	-2.79471	1.57467e-07
ENSRNOG00000011250	Inmt	4:85381888-85386231	6.15954e-10	-57.8573	2.56385e-07
ENSRNOG00000002218	Stbd1	14:16976355-16979760	6.81746e-10	-2.12929	2.80223e-07
ENSRNOG00000051286	LOC100911516	9:101106891-101107575	1.06864e-09	4.46686	4.08606e-07
ENSRNOG00000038370	AABR07034632.1	11:81707803-81735592	1.71175e-09	-2.24172	6.25416e-07
ENSRNOG00000015335	Rpl13	19:55917735-55919996	2.1325e-09	2.28046	7.54012e-07
ENSRNOG00000056596	Alas1	8:114927721-114940177	2.58749e-09	-2.33643	8.95625e-07
ENSRNOG00000019708	Ctsf	1:220114227-220119976	2.77143e-09	-2.99693	9.36177e-07
ENSRNOG00000059770	AABR07044383.1	20:3791628-3796275	3.55335e-09	-4.89384	1.16845e-06
ENSRNOG00000029810	LOC100911766	1:214454089-214473741	4.66406e-09	-2.53064	1.44687e-06
ENSRNOG00000042905	RT1-T24-4	20:3189472-3197457	6.58843e-09	-2.21967	1.98759e-06
ENSRNOG00000027784	Tsku	1:163317281-163328591	7.66811e-09	-3.77658	2.27163e-06
ENSRNOG00000026605	Ifi27l2b	6:127336304-127337791	8.39681e-09	-2.41163	2.44347e-06
ENSRNOG00000033803	LOC100360841	9:69790830-69791196	1.06143e-08	-3.56711	2.99688e-06
ENSRNOG00000055765	Rasl10b	KL568414.1:23533-32066	1.11349e-08	-4.34661	3.07687e-06
ENSRNOG00000001517	Pdk1	3:58530869-58558027	1.73388e-08	-3.80233	4.4894e-06
ENSRNOG00000046007	Cldn3	12:21831341-21832813	3.85077e-08	-2.44965	9.04463e-06
ENSRNOG00000049876	Prkar1a	10:97940704-97957336	3.97541e-08	-2.10953	9.24493e-06
ENSRNOG00000002342	Aldh3a2	10:47525492-47546345	4.94083e-08	-2.0488	1.12048e-05
ENSRNOG00000047706	LOC103690108	20:3791406-3794027	7.41874e-08	-2.94278	1.56378e-05
ENSRNOG00000013439	Cpn1	1:263733518-263762785	8.11307e-08	-2.00146	1.69925e-05
ENSRNOG00000012443	Cpt2	5:127505613-127523089	8.25359e-08	-2.37191	1.71774e-05
ENSRNOG00000047023	Aldh1l1	4:123516787-123557501	3.00176e-07	-3.28805	5.22258e-05
ENSRNOG00000048989	Larp7	2:231867134-231881939	5.3456e-07	-2.80321	8.74524e-05
ENSRNOG00000062158	AC134224.3	1:221158097-221158792	6.1583e-07	-7.68132	9.64454e-05
ENSRNOG00000016459	Eif3j	3:113976686-113998922	7.87311e-07	-2.2461	0.000119857
ENSRNOG00000011351	Mat1a	16:18690245-18709133	8.7219e-07	-2.00887	0.000129775
ENSRNOG00000013409	Gclm	2:225827503-225847874	1.02195e-06	-3.02916	0.000146745
ENSRNOG00000025602	Cdk4	7:70349862-70352418	1.28559e-06	-2.41615	0.000177758
ENSRNOG00000011573	Csad	7:143781701-143793970	2.90634e-06	-2.42594	0.00035396
ENSRNOG00000019506	Dnajb2	9:82436457-82444668	4.28533e-06	-2.08657	0.000482584
ENSRNOG00000010178	Cgrrf1	15:23619122-23639628	7.23039e-06	-2.10455	0.000766958
ENSRNOG00000003269	Atp6v0e1	10:16769665-16792909	8.72753e-06	-2.2904	0.000896836
ENSRNOG00000011621	Hnrnpc	15:28486616-28517353	9.21307e-06	-2.11524	0.000937936
ENSRNOG00000012053	S100a16	2:189922995-189928848	1.66922e-05	-2.13027	0.00155493
ENSRNOG00000007091	Ly6e	7:116355697-116359862	8.32736e-05	-2.22774	0.00603902
ENSRNOG00000005861	Hsd11b1	13:111926441-111972603	0.000199172	-2.35733	0.0122415
ENSRNOG00000000799	Abcf1	20:3309898-3322825	0.000224644	-2.21335	0.0135541

## Sheet: Liver_CT_vs_H60
Summary of DEIDEGs identified in liver at CT vs. H60.
Feature ID	Gene name	Position	P-value	Fold change	FDR
ENSRNOG00000000064	Atp5me	14:2325307-2326436	0	-3.4279	0
ENSRNOG00000004196	LOC108352650	6:91455332-91456696	0	-2.42998	0
ENSRNOG00000007235	Atp5mc1	10:83895946-83898527	0	-2.87883	0
ENSRNOG00000026605	Ifi27l2b	6:127336304-127337791	0	-4.67754	0
ENSRNOG00000028505	Rps18	20:5441875-5445553	0	-2.96768	0
ENSRNOG00000031022	LOC108348287	18:1504177-1505570	0	-2.55428	0
ENSRNOG00000033916	AC141489.1	5:159606646-159606989	0	-3.03855	0
ENSRNOG00000042886	Rps28	7:18682070-18683440	0	-2.88159	0
ENSRNOG00000050647	Hspa1b	20:4877323-4879779	3.52525e-63	1281.27	1.05383e-59
ENSRNOG00000028690	LOC100362366	3:24600602-24601063	6.54774e-42	-5.57841	1.79424e-38
ENSRNOG00000037673	AABR07071891.1	1:84573495-84573959	1.35775e-39	-5.81462	3.43437e-36
ENSRNOG00000048199	Rps19l2	9:16802318-16807966	1.69911e-38	9.91292	3.99085e-35
ENSRNOG00000033024	AC099453.1	5:78392714-78393143	1.43633e-35	-11.5872	3.14873e-32
ENSRNOG00000030538	Slco1b2	4:175814117-175881768	2.33156e-28	3.3451	4.79179e-25
ENSRNOG00000026616	Ndufb2	4:67378187-67385266	8.46059e-26	-2.5155	1.63653e-22
ENSRNOG00000020704	Tkfc	1:226644199-226657408	1.52646e-22	-4.93632	2.78858e-19
ENSRNOG00000049075	Fabp5	2:93981655-93985378	7.04743e-22	-9.38851	1.21969e-18
ENSRNOG00000034116	Gk	X:54227396-54303864	7.10754e-21	7.14812	1.16859e-17
ENSRNOG00000000902	Hsph1	12:6322667-6341902	1.29624e-20	11.4539	2.02973e-17
ENSRNOG00000031053	Mt-nd4l	MT:9869-10166	1.61911e-20	4.8431	2.42005e-17
ENSRNOG00000020298	Bag3	1:199941160-199965191	7.92717e-20	13.1822	1.13334e-16
ENSRNOG00000058646	Zfp36l1	6:103308044-103313074	1.00706e-19	4.60483	1.3798e-16
ENSRNOG00000057823	Ubc	12:36638456-36642734	3.76501e-19	3.53128	4.9522e-16
ENSRNOG00000002693	Nme1	10:81657152-81666523	4.56862e-19	-3.04861	5.77808e-16
ENSRNOG00000007139	Ttpa	5:34007919-34028452	1.21975e-18	2.86314	1.48552e-15
ENSRNOG00000031889	AABR07065438.1	6:128738387-128739319	1.89262e-18	-4.5464	2.22268e-15
ENSRNOG00000012290	Gchfr	3:110975922-110979957	3.07577e-18	-2.73409	3.4876e-15
ENSRNOG00000024967	Uqcrb	7:71264513-71269869	3.40213e-18	-2.52181	3.72907e-15
ENSRNOG00000028616	Pck1	3:171213935-171219871	8.64292e-18	10.4283	8.88141e-15
ENSRNOG00000005542	Apob	6:33176777-33224997	2.78285e-17	2.61543	2.77298e-14
ENSRNOG00000009364	Ndufb9	7:98813039-98819452	6.34693e-17	-2.05032	6.12158e-14
ENSRNOG00000032917	Zfand2a	12:17252092-17263477	6.51569e-17	86.3806	6.12158e-14
ENSRNOG00000016660	Cox5b	9:43259708-43262040	2.22045e-16	-2.38538	2.02819e-13
ENSRNOG00000032232	Snrpg	1:91588227-91588609	4.0111e-16	-73.6985	3.56479e-13
ENSRNOG00000011696	Lifr	2:56426366-56489415	4.31325e-16	4.67342	3.73244e-13
ENSRNOG00000010732	RGD1561590	15:38069319-38073622	4.42684e-16	-3.0708	3.7325e-13
ENSRNOG00000042903	Cox7a2l2	8:87209529-87213627	8.88178e-16	-2.20461	7.30149e-13
ENSRNOG00000011494	Rpl36a	X:105402866-105405580	1.00057e-15	-2.86881	8.02481e-13
ENSRNOG00000023546	Hspb1	12:23839398-23841049	1.66598e-15	15.0173	1.30434e-12
ENSRNOG00000005698	Ndufa5	4:51590412-51598771	3.75514e-15	-2.22929	2.87163e-12
ENSRNOG00000010420	Sem1	4:32067443-32087600	3.8695e-15	-2.29613	2.89183e-12
ENSRNOG00000001420	Fis1	12:22750484-22765308	4.25701e-15	-2.50034	3.11074e-12
ENSRNOG00000005668	Ndufa8	3:15362823-15379381	6.59142e-15	-2.8824	4.71186e-12
ENSRNOG00000042503	Ndufv2	9:113875702-113900190	7.0936e-15	-2.01573	4.96296e-12
ENSRNOG00000021405	Cyp2c7	1:148053686-148119857	1.11464e-14	2.5422	7.55511e-12
ENSRNOG00000016723	Phpt1	3:2796996-2798470	1.12581e-14	-2.48409	7.55511e-12
ENSRNOG00000006305	Slc38a2	7:138088648-138100841	1.17234e-14	5.65983	7.71004e-12
ENSRNOG00000029512	LOC100361854	X:115495697-115496045	1.90199e-14	-3.59144	1.20275e-11
ENSRNOG00000022392	Hspb8	12:45905370-45920013	2.01027e-14	3.44343	1.24724e-11
ENSRNOG00000062158	AC134224.3	1:221158097-221158792	2.26731e-14	-26.5712	1.38067e-11
ENSRNOG00000007336	Churc1	6:99817430-99831576	6.04585e-14	-2.45377	3.42768e-11
ENSRNOG00000045555	LOC100910944	3:152222725-152224326	8.97318e-14	-2.41244	5.0011e-11
ENSRNOG00000033803	LOC100360841	9:69790830-69791196	9.40415e-14	-6.04738	5.15394e-11
ENSRNOG00000021824	Dnajb1	19:24747177-24750919	1.24199e-13	12.4247	6.69514e-11
ENSRNOG00000003975	Pfn1	10:57273004-57275708	1.9007e-13	-2.13235	9.6155e-11
ENSRNOG00000003430	F9	X:143097524-143141794	2.33773e-13	2.21689	1.16472e-10
ENSRNOG00000042696	Micos10	5:157546855-157573183	2.69181e-13	-2.16662	1.32112e-10
ENSRNOG00000003977	Dusp1	10:16970625-16973418	3.65023e-13	17.4789	1.76516e-10
ENSRNOG00000030747	LOC685963	2:199479006-199479309	3.86358e-13	-2.62479	1.84125e-10
ENSRNOG00000013011	Dnajb4	2:257394817-257425242	4.17701e-13	5.93379	1.96218e-10
ENSRNOG00000060449	Rps21	3:175629373-175630048	5.20917e-13	-2.60996	2.34298e-10
ENSRNOG00000056728	G6pd	X:156274799-156293926	5.27264e-13	-7.73994	2.34298e-10
ENSRNOG00000034066	Hspa8	8:44990013-44993179	7.12884e-13	8.76528	3.12557e-10
ENSRNOG00000026293	Jun	5:114011188-114014277	1.51766e-12	20.0541	6.39813e-10
ENSRNOG00000045636	Fasn	10:109987734-110005901	1.84093e-12	-5.15522	7.66269e-10
ENSRNOG00000023150	Gpi	1:90063410-90091287	2.23583e-12	-2.90836	9.07665e-10
ENSRNOG00000014568	Ndufb10	10:14090127-14092289	2.7767e-12	-2.18987	1.11349e-09
ENSRNOG00000020178	Cope	16:20863140-20873521	7.07305e-12	-2.10605	2.67337e-09
ENSRNOG00000056457	Gpd1	7:141370490-141377928	7.86119e-12	-2.74303	2.93749e-09
ENSRNOG00000021438	Tuba1c	7:140716112-140723714	9.59215e-12	-2.42019	3.50465e-09
ENSRNOG00000013133	Foxa2	3:142383277-142387481	1.05368e-11	-4.25888	3.80749e-09
ENSRNOG00000038045	AC128960.1	17:78876110-78876537	1.24153e-11	-3.17928	4.43752e-09
ENSRNOG00000006539	Pex16	3:81283136-81292573	1.28628e-11	-2.58651	4.54804e-09
ENSRNOG00000015774	Mreg	9:79490049-79545024	1.34158e-11	3.52788	4.6931e-09
ENSRNOG00000016166	Pdlim1	1:259308295-259357056	2.13793e-11	-2.93165	7.21614e-09
ENSRNOG00000005615	Gadd45a	4:97782511-97784842	2.1506e-11	-3.57154	7.21614e-09
ENSRNOG00000055314	Msrb1	10:14105749-14111463	2.39163e-11	-2.00566	7.85987e-09
ENSRNOG00000008459	Anapc13	8:111107357-111115774	2.41416e-11	-2.25477	7.85987e-09
ENSRNOG00000015703	Hypk	3:113423692-113424846	2.79703e-11	-2.16286	9.01712e-09
ENSRNOG00000042905	RT1-T24-4	20:3189472-3197457	2.95911e-11	-2.71476	9.44704e-09
ENSRNOG00000059714	Hsp90aa1	6:135107270-135112775	3.64768e-11	3.72718	1.13157e-08
ENSRNOG00000053086	Selenop	2:53109683-53114858	4.00977e-11	3.63274	1.22086e-08
ENSRNOG00000007029	Dnaja1	5:57028466-57039378	4.06886e-11	2.9615	1.22749e-08
ENSRNOG00000039249	AABR07035539.1	12:19159467-19159901	5.48998e-11	-17.106	1.62116e-08
ENSRNOG00000050315	Dcxr	10:109906814-109909715	5.72323e-11	-2.51448	1.66546e-08
ENSRNOG00000024309	Cox6b1	1:89075974-89084859	5.83164e-11	-2.45122	1.68212e-08
ENSRNOG00000024845	Mrps21	2:197974760-197982385	5.95303e-11	-2.36519	1.7022e-08
ENSRNOG00000020029	Mcrip2	10:15230800-15235740	6.95312e-11	-3.70094	1.97103e-08
ENSRNOG00000003228	Mid1ip1	X:13114568-13116743	8.50611e-11	-3.9093	2.39065e-08
ENSRNOG00000011189	Acy1	8:115134764-115140080	9.04817e-11	-2.59056	2.52145e-08
ENSRNOG00000021035	Rpl18	1:101701974-101703550	1.18179e-10	-2.05415	3.21164e-08
ENSRNOG00000042821	Cd59	3:94010474-94028621	1.22996e-10	3.01919	3.31515e-08
ENSRNOG00000000814	Fabp7	20:40769585-40773349	1.26357e-10	3.78132	3.35079e-08
ENSRNOG00000015866	Hint2	5:59150344-59152599	1.3251e-10	-2.10006	3.48585e-08
ENSRNOG00000028382	Rfxapl1	2:144213402-144217600	1.43678e-10	56.1927	3.72014e-08
ENSRNOG00000000473	Pfdn6	20:5455973-5457444	1.56077e-10	-2.1658	4.0096e-08
ENSRNOG00000019293	AABR07006025.1	1:214015218-214024153	1.89499e-10	-2.65431	4.83046e-08
ENSRNOG00000050997	Ifrd1	6:60132023-60151420	2.2286e-10	3.42757	5.63715e-08
ENSRNOG00000008047	Khk	6:26810578-26820959	3.18211e-10	-2.32311	7.86746e-08
ENSRNOG00000024568	Ndufs7	7:12318756-12326392	3.38966e-10	-2.3681	8.31808e-08
ENSRNOG00000009057	Sec62	2:116189861-116219750	3.8762e-10	-2.57716	9.44157e-08
ENSRNOG00000015591	Cndp2	18:81521967-81539065	4.72839e-10	-2.60962	1.14326e-07
ENSRNOG00000031263	Haao	6:7045151-7058314	5.48481e-10	-2.02114	1.31647e-07
ENSRNOG00000043114	Tomm7	4:7835948-7842789	5.86348e-10	-2.00507	1.38711e-07
ENSRNOG00000014117	Hmox1	19:14508615-14515456	8.05381e-10	3.27926	1.85198e-07
ENSRNOG00000021575	Cfhr2	13:56642364-56693968	8.38066e-10	2.89361	1.90056e-07
ENSRNOG00000037518	Hyi	5:137189472-137192240	9.29799e-10	-2.30111	2.09105e-07
ENSRNOG00000038001	Slc25a1	11:87204174-87207264	9.34783e-10	-2.22239	2.09105e-07
ENSRNOG00000049394	LOC679739	1:32573227-32581781	1.06326e-09	-2.15621	2.30021e-07
ENSRNOG00000018289	Park7	5:167982438-168004724	1.20989e-09	-2.32085	2.60031e-07
ENSRNOG00000020460	Banf1	1:220744194-220746224	1.2554e-09	-2.06022	2.68061e-07
ENSRNOG00000006898	Mrps16	15:4351291-4353694	1.45949e-09	-2.1049	3.06285e-07
ENSRNOG00000015455	Spr	4:116912350-116916236	1.5532e-09	-2.16276	3.21219e-07
ENSRNOG00000028717	Ndufb7	19:24701048-24705405	1.68363e-09	-2.01387	3.41746e-07
ENSRNOG00000048282	Mpnd	9:11055370-11061611	1.86615e-09	-2.1705	3.71907e-07
ENSRNOG00000029971	Mt-nd5	MT:11735-13565	1.90924e-09	2.27728	3.78203e-07
ENSRNOG00000057333	AABR07030184.1	10:74765384-74765600	2.12106e-09	-91.1917	4.15159e-07
ENSRNOG00000012106	Dnaja4	8:59278261-59294003	2.36882e-09	7.23775	4.60911e-07
ENSRNOG00000022296	Pnpla5	7:124988523-124999137	2.82112e-09	-8.61439	5.42497e-07
ENSRNOG00000053210	Zc3h11a	13:50196041-50234862	2.97735e-09	4.03791	5.65919e-07
ENSRNOG00000020628	LOC100361913	1:87190380-87191588	3.43319e-09	-4.9241	6.48814e-07
ENSRNOG00000023387	LOC100912599	1:31264754-31273159	3.70979e-09	-2.13575	6.9312e-07
ENSRNOG00000042344	Smim22	10:10766207-10767389	3.75683e-09	-3.35399	6.97942e-07
ENSRNOG00000046316	Tomm6	9:15313522-15314435	3.87464e-09	-2.0372	7.11824e-07
ENSRNOG00000019428	Higd1a	8:130482492-130491998	4.2086e-09	-2.55076	7.64593e-07
ENSRNOG00000032630	Mrps28	2:95045033-95173753	5.23414e-09	-2.30059	9.35404e-07
ENSRNOG00000038012	Commd6	15:86136095-86142672	5.63532e-09	-2.75487	1.00165e-06
ENSRNOG00000000909	Uspl1	12:6929977-6956984	6.01616e-09	5.64128	1.05791e-06
ENSRNOG00000048470	LOC100911238	12:8746854-8759599	6.33119e-09	-4.04805	1.10739e-06
ENSRNOG00000026965	Tmem140	4:62380913-62391912	6.4437e-09	2.20242	1.1211e-06
ENSRNOG00000049814	LOC100910882	3:152226709-152259156	6.49291e-09	61.8187	1.12372e-06
ENSRNOG00000058780	Igfbp1	14:87448691-87453785	7.28883e-09	3.43467	1.25486e-06
ENSRNOG00000001182	Ndufv3	20:10265805-10275304	7.591e-09	-2.12136	1.30008e-06
ENSRNOG00000016272	Edf1	3:2781168-2785474	7.65836e-09	-2.24684	1.30482e-06
ENSRNOG00000011952	Samm50	7:125058896-125082505	8.22295e-09	-2.19384	1.37659e-06
ENSRNOG00000009565	Pdk4	4:30546663-30556814	8.24704e-09	4.20173	1.37659e-06
ENSRNOG00000056596	Alas1	8:114927721-114940177	8.533e-09	2.06073	1.41e-06
ENSRNOG00000017851	Etfb	1:98472744-98486976	8.77437e-09	-2.01175	1.43546e-06
ENSRNOG00000032303	LOC108349682	1:219395275-219395623	8.8756e-09	-2.09887	1.43945e-06
ENSRNOG00000052142	Ahsa2	14:108265206-108273938	8.8863e-09	3.34693	1.43945e-06
ENSRNOG00000024964	Nufip2	10:65176647-65200109	9.36884e-09	14.5114	1.51017e-06
ENSRNOG00000029861	Gsta2	8:85640054-85645718	1.03303e-08	-2.86012	1.65703e-06
ENSRNOG00000001142	Prkab1	12:46316235-46326790	1.05213e-08	-2.51446	1.67948e-06
ENSRNOG00000010408	Polr2k	7:74989222-74992582	1.09161e-08	-2.19521	1.73408e-06
ENSRNOG00000019682	Timm13	7:11677339-11678442	1.21284e-08	-2.10223	1.90196e-06
ENSRNOG00000020990	Fgf21	1:101595578-101596822	1.21464e-08	11.7687	1.90196e-06
ENSRNOG00000014288	Fn1	9:78900102-78969078	1.32103e-08	2.04407	2.05875e-06
ENSRNOG00000047503	Apoc3	8:50529317-50531498	1.33399e-08	-2.10289	2.06913e-06
ENSRNOG00000002478	Insig2	13:37266311-37287458	1.46725e-08	3.51229	2.26514e-06
ENSRNOG00000056135	Tsc22d3	X:111884294-111887906	1.65053e-08	2.95879	2.5127e-06
ENSRNOG00000037627	Trappc1	10:55924937-55926783	2.11923e-08	-2.45975	3.16757e-06
ENSRNOG00000011250	Inmt	4:85381888-85386231	2.17358e-08	-18.7223	3.23411e-06
ENSRNOG00000010706	Ccdc117	14:85763396-85772762	2.3342e-08	4.92689	3.44195e-06
ENSRNOG00000019201	Naxe	2:187424326-187426375	2.87427e-08	-2.16008	4.2194e-06
ENSRNOG00000015654	Ghr	2:53150369-53413638	2.93208e-08	2.33984	4.28513e-06
ENSRNOG00000047158	Selenbp1	2:195416468-195423787	3.06585e-08	-2.02139	4.46081e-06
ENSRNOG00000002520	Litaf	10:4719712-4763510	3.20696e-08	3.79512	4.64202e-06
ENSRNOG00000010224	Rab30	1:157573323-157660008	3.21863e-08	4.62649	4.64202e-06
ENSRNOG00000012929	Wsb1	10:66586923-66602987	3.45068e-08	3.61505	4.95497e-06
ENSRNOG00000015736	Dhrs3	5:162808645-162843383	3.54366e-08	-2.30193	5.06635e-06
ENSRNOG00000018405	Apoc4	1:80595325-80599572	3.91925e-08	-2.01821	5.55503e-06
ENSRNOG00000043193	Smim1	5:171309334-171312026	4.33523e-08	-3.49876	6.10188e-06
ENSRNOG00000002572	Cacybp	13:77948770-77959110	4.34218e-08	2.41629	6.10188e-06
ENSRNOG00000012681	Lgals9	10:64737021-64760201	4.53884e-08	-2.15732	6.35109e-06
ENSRNOG00000053468	Tuba1b	7:140614751-140617721	5.56955e-08	-2.09289	7.6629e-06
ENSRNOG00000008639	Pabpc1	7:75409580-75422268	6.28186e-08	2.13946	8.43128e-06
ENSRNOG00000010240	Tent5a	8:92937738-92942076	7.04148e-08	9.72453	9.37429e-06
ENSRNOG00000000053	Crp	13:91054973-91093713	7.59898e-08	2.15722	1.00352e-05
ENSRNOG00000007227	Mien1	10:86391847-86393141	7.70218e-08	-2.02585	1.01308e-05
ENSRNOG00000016791	Chka	1:219077770-219126220	9.63854e-08	3.99159	1.25274e-05
ENSRNOG00000020420	Pklr	2:188449209-188459592	9.80361e-08	-3.56158	1.26609e-05
ENSRNOG00000023360	Fus	1:199412833-199426702	9.8182e-08	-2.73882	1.26609e-05
ENSRNOG00000015206	Alad	5:78368866-78379346	1.01364e-07	-2.17113	1.30201e-05
ENSRNOG00000014350	Ccn1	2:251529353-251532312	1.32086e-07	10.5602	1.65148e-05
ENSRNOG00000001415	Ap1s1	12:22665111-22676075	1.33996e-07	-2.18401	1.66901e-05
ENSRNOG00000037690	Sertad3	1:84280944-84284663	1.48616e-07	6.11132	1.8372e-05
ENSRNOG00000004448	Acss3	7:49047012-49250957	1.53575e-07	2.29616	1.89138e-05
ENSRNOG00000017693	Slc2a5	5:167141874-167174310	1.63022e-07	-4.02173	1.99281e-05
ENSRNOG00000016099	Id4	17:16692556-16695126	1.89572e-07	2.57543	2.30025e-05
ENSRNOG00000033195	A1cf	1:250426157-250514866	1.93059e-07	6.01317	2.33395e-05
ENSRNOG00000018796	Herpud1	19:11046908-11057254	2.0195e-07	2.5703	2.40606e-05
ENSRNOG00000013907	Sall1	19:23389374-23405039	2.05811e-07	3.13161	2.4432e-05
ENSRNOG00000016265	Acsl5	1:276240702-276290008	2.10712e-07	-2.51757	2.49239e-05
ENSRNOG00000016097	Kyat1	3:8752624-8766433	2.21999e-07	-2.28003	2.61649e-05
ENSRNOG00000046112	Dedd2	1:82072543-82088275	2.27572e-07	3.89755	2.66308e-05
ENSRNOG00000049900	Irf2bp2	19:59499875-59502161	2.39345e-07	3.29644	2.78105e-05
ENSRNOG00000015844	Snrpd2	1:80056754-80059996	2.41276e-07	-2.00988	2.79362e-05
ENSRNOG00000002828	Tob1	10:81913688-81915716	2.44296e-07	2.65961	2.81866e-05
ENSRNOG00000003232	Slc9a3r1	10:103713044-103730145	2.45998e-07	-2.22499	2.82837e-05
ENSRNOG00000020624	Acadsb	1:201981356-202021008	2.55338e-07	4.14838	2.92553e-05
ENSRNOG00000000186	Tst	7:119616323-119623072	2.63883e-07	-2.11834	3.01294e-05
ENSRNOG00000017105	Dpyd	2:221823686-222694627	2.81018e-07	2.49938	3.19747e-05
ENSRNOG00000009715	Me1	8:94256838-94368834	2.94939e-07	-4.14936	3.33281e-05
ENSRNOG00000038951	Cox17	11:64962665-64968437	3.0494e-07	-2.02843	3.42374e-05
ENSRNOG00000018076	Fmo5	2:199796880-199823927	3.05068e-07	2.14904	3.42374e-05
ENSRNOG00000062247	AABR07031521.1	18:17116551-17118501	3.32823e-07	3.65149	3.7099e-05
ENSRNOG00000020723	Pten	1:251421595-251487832	3.4821e-07	2.6274	3.84234e-05
ENSRNOG00000047816	Ccs	1:220075246-220096404	3.50802e-07	-2.52146	3.858e-05
ENSRNOG00000058484	Anp32a	AABR07024206.1:1945-8593	3.7962e-07	-2.17179	4.13346e-05
ENSRNOG00000017780	Akr7a2	5:157759415-157768471	4.13237e-07	-2.04707	4.44068e-05
ENSRNOG00000020676	Ppp1r14a	1:87224676-87232848	4.16622e-07	-3.22523	4.45741e-05
ENSRNOG00000055079	Ndufaf2	2:39321740-39434560	4.20354e-07	-2.98566	4.4733e-05
ENSRNOG00000001189	Sik1	20:10668410-10680283	4.49346e-07	5.06014	4.73585e-05
ENSRNOG00000019552	Lsm7	7:11724961-11727388	4.703e-07	-2.16905	4.94085e-05
ENSRNOG00000003745	Atf3	13:109817727-109849632	4.89655e-07	36.6924	5.12782e-05
ENSRNOG00000014338	Slc25a25	3:11442396-11452529	5.22999e-07	2.92092	5.39115e-05
ENSRNOG00000022268	Pnpla3	7:125034763-125055976	5.73161e-07	-14.1752	5.88977e-05
ENSRNOG00000019734	Mrpl14	9:17687621-17698569	6.03223e-07	-2.61189	6.1411e-05
ENSRNOG00000057855	F5	13:82479997-82535534	6.49823e-07	3.83985	6.57481e-05
ENSRNOG00000030391	Ei24	8:39254888-39266959	6.80565e-07	2.17332	6.86473e-05
ENSRNOG00000017899	Akr7a3	5:157801162-157813756	7.47437e-07	-2.07979	7.5162e-05
ENSRNOG00000010887	RGD1309534	8:13838571-13861212	7.74735e-07	-3.14939	7.76695e-05
ENSRNOG00000021079	Fxyd1	1:89484198-89488223	8.05332e-07	-2.25423	8.02476e-05
ENSRNOG00000012053	S100a16	2:189922995-189928848	8.1262e-07	-2.43158	8.04861e-05
ENSRNOG00000013963	Il6st	2:44289392-44314944	8.41652e-07	4.74887	8.31112e-05
ENSRNOG00000016348	Tat	19:41675354-41686229	8.58324e-07	2.58805	8.45038e-05
ENSRNOG00000031579	LOC100363469	10:78992579-78993045	9.01977e-07	2.23356	8.80337e-05
ENSRNOG00000002947	Dpt	13:83073543-83102401	9.0221e-07	-2.27995	8.80337e-05
ENSRNOG00000006331	Elovl5	8:85259981-85285983	9.05535e-07	3.24892	8.80968e-05
ENSRNOG00000015967	Sh3bgrl3	5:152357269-152358643	9.62957e-07	-2.4212	9.31321e-05
ENSRNOG00000052604	LOC100361907	13:56730396-56763981	1.02276e-06	2.27865	9.86258e-05
ENSRNOG00000051286	LOC100911516	9:101106891-101107575	1.15002e-06	3.03936	0.000110251
ENSRNOG00000004006	Dnajb9	6:64165912-64170151	1.32244e-06	3.00611	0.000125319
ENSRNOG00000050210	RT1-CE10	20:154073-157861	1.34118e-06	-2.16747	0.00012673
ENSRNOG00000029993	Kynu	3:28416953-28566928	1.43549e-06	2.6045	0.000134482
ENSRNOG00000004247	Nhp2	10:34975707-34979082	1.51068e-06	-3.45835	0.000140327
ENSRNOG00000012724	Czib	5:127489417-127497293	1.56103e-06	-2.31353	0.000144189
ENSRNOG00000014387	Chac1	3:111160204-111163425	1.6441e-06	12.6068	0.000150178
ENSRNOG00000053452	LOC100361457	3:75643053-75644954	1.70628e-06	-2.83637	0.000155423
ENSRNOG00000013004	Akr1d1	4:65110745-65143941	1.78284e-06	2.13128	0.000161947
ENSRNOG00000036984	Slco1a1	4:176158639-176231344	1.89486e-06	2.37358	0.000169317
ENSRNOG00000059593	Cetn2	X:152927717-152932953	1.92895e-06	-2.22813	0.000171896
ENSRNOG00000058393	Taf15	10:70689862-70721892	1.94131e-06	-2.72016	0.00017253
ENSRNOG00000020763	Snrnp70	1:101367470-101388129	2.03891e-06	-2.25365	0.000179747
ENSRNOG00000001797	Umps	11:70034138-70044628	2.10214e-06	-2.14484	0.000184826
ENSRNOG00000006990	Grb7	10:86399826-86409348	2.13317e-06	2.98833	0.000186556
ENSRNOG00000007040	Timm17a	13:52124634-52136127	2.32294e-06	-2.30868	0.000201544
ENSRNOG00000000461	LOC108348112	20:5262119-5269337	2.37807e-06	2.46387	0.000205785
ENSRNOG00000042499	LOC100364435	4:100882215-100883275	2.44112e-06	-2.00544	0.000210134
ENSRNOG00000019442	Josd2	1:100473642-100477351	2.59614e-06	-2.41006	0.000221871
ENSRNOG00000017506	Cltb	17:10537364-10554989	2.6831e-06	-2.05052	0.000226267
ENSRNOG00000010658	LOC103691744	2:264266983-264293046	2.71941e-06	2.27363	0.000228702
ENSRNOG00000007964	Tp53inp1	5:24410862-24416888	3.07473e-06	11.159	0.000254036
ENSRNOG00000056194	LOC100912405	8:38545714-38549268	3.11435e-06	-29.1458	0.000256664
ENSRNOG00000057601	AABR07044080.2	19:56443631-56443869	3.44223e-06	-5.05765	0.000282271
ENSRNOG00000031789	Rangap1	7:122940375-122967178	3.50274e-06	-2.22793	0.000285808
ENSRNOG00000047714	Tmem37	13:36094519-36101411	3.60015e-06	-2.30874	0.000292306
ENSRNOG00000050630	AABR07070043.1	8:45561389-45562574	3.68695e-06	-5.79323	0.000298616
ENSRNOG00000032825	LOC100362027	10:38024476-38024937	3.70939e-06	-2.09354	0.000299695
ENSRNOG00000018107	Zfand5	1:238843337-238852566	3.82483e-06	2.46316	0.000307255
ENSRNOG00000022082	LOC103690006	4:117800627-117814658	3.83884e-06	-6.60706	0.000307255
ENSRNOG00000058920	Coa8	6:136279495-136304095	3.84743e-06	32.1416	0.000307255
ENSRNOG00000004860	Myh9	7:118741109-118792625	3.84969e-06	-4.56025	0.000307255
ENSRNOG00000007390	Nfkbia	6:76267227-76270457	4.01866e-06	2.58176	0.000319965
ENSRNOG00000030715	Cfh	13:56978606-57080622	4.24075e-06	2.04911	0.00033602
ENSRNOG00000019684	Antkmt	10:15159802-15161938	4.27825e-06	-2.25849	0.000337366
ENSRNOG00000018397	Dnph1	9:16845524-16848503	4.52571e-06	-2.52831	0.000355176
ENSRNOG00000008706	Tbx3	12:42480559-42492526	4.56871e-06	5.50352	0.000356848
ENSRNOG00000006924	Tmem125	5:137370576-137372993	4.79056e-06	-2.53197	0.000373289
ENSRNOG00000007895	Pdhb	15:18539209-18546854	4.86619e-06	-2.05354	0.000377394
ENSRNOG00000017744	Dram2	2:209161046-209188622	4.98369e-06	2.17051	0.000385597
ENSRNOG00000020578	Ceacam1	1:82327954-82344345	5.03181e-06	2.20492	0.000387497
ENSRNOG00000015218	Nsmce1	1:196857460-196884302	5.39901e-06	-2.60027	0.000413836
ENSRNOG00000017775	Slc5a1	14:82909980-82975263	6.07156e-06	18.6358	0.000460026
ENSRNOG00000004206	Glrx5	6:128750794-128760880	6.18624e-06	-2.00263	0.000467637
ENSRNOG00000018176	Rab6a	1:165625057-165664192	6.36951e-06	2.62978	0.000479288
ENSRNOG00000018698	Wac	17:60888016-60946426	6.5551e-06	4.60162	0.000491005
ENSRNOG00000028668	Slc28a2	3:114355797-114647382	6.66623e-06	2.63397	0.000497065
ENSRNOG00000007229	Nr0b2	5:151776003-151779319	6.7706e-06	-3.2055	0.000502568
ENSRNOG00000046621	AABR07043748.1	19:38340737-38344845	7.26439e-06	-2.93745	0.000533203
ENSRNOG00000042237	Tm6sf2	16:21092307-21099878	7.82501e-06	-2.38619	0.000566762
ENSRNOG00000001391	Sdsl	12:41636993-41647205	7.9867e-06	-2.95228	0.000577201
ENSRNOG00000047821	Smlr1	1:20856186-20877716	8.08281e-06	-2.00533	0.000581975
ENSRNOG00000005513	Srsf5	6:104611025-104615302	8.08814e-06	-2.32505	0.000581975
ENSRNOG00000009873	Ints6	15:45858607-45947030	8.11971e-06	5.07215	0.00058297
ENSRNOG00000012980	Hyls1	8:36763480-36764422	8.56308e-06	7.3464	0.000610802
ENSRNOG00000021240	Atrn	3:123434408-123567918	8.98468e-06	3.00362	0.000633997
ENSRNOG00000006019	G0s2	13:112004139-112005052	9.00394e-06	2.83369	0.000633997
ENSRNOG00000004377	Lpin1	6:41799748-41870046	9.34335e-06	3.90418	0.000653563
ENSRNOG00000012379	Wdr18	7:12561323-12569143	9.34805e-06	-2.24452	0.000653563
ENSRNOG00000031033	Mt-nd2	MT:3903-4942	9.37309e-06	2.15051	0.000653563
ENSRNOG00000006328	Wwp1	5:33609135-33664435	9.38091e-06	2.92934	0.000653563
ENSRNOG00000016831	Serpinh1	1:164301009-164308317	9.3812e-06	2.13659	0.000653563
ENSRNOG00000003472	Atp11c	X:143346251-143453612	1.02734e-05	4.26834	0.000712698
ENSRNOG00000008474	Acox3	14:80314430-80355420	1.07936e-05	2.38773	0.000744078
ENSRNOG00000017866	Sirt5	17:23986757-24013881	1.13891e-05	-2.25372	0.00077699
ENSRNOG00000050305	LOC100911854	1:248723396-248729962	1.16861e-05	2.20741	0.000795602
ENSRNOG00000019982	Ethe1	1:81456983-81472097	1.3289e-05	-2.24297	0.000889987
ENSRNOG00000013975	Acat2l1	1:47996520-48026268	1.34191e-05	-2.49094	0.000896872
ENSRNOG00000046763	Adssl1	6:137184819-137206693	1.46071e-05	-2.69591	0.000966447
ENSRNOG00000045967	AABR07064061.1	6:62796950-62798384	1.52374e-05	4.83552	0.00100411
ENSRNOG00000026643	Chordc1	8:17421556-17446165	1.54971e-05	2.53311	0.00101715
ENSRNOG00000042714	RGD1559459	14:22937420-22952822	1.57447e-05	3.7261	0.00103134
ENSRNOG00000020938	Ppp1r15a	1:101511900-101514974	1.57808e-05	3.90989	0.00103165
ENSRNOG00000000658	Acacb	12:48127148-48238887	1.62532e-05	-2.5648	0.00105623
ENSRNOG00000014448	Arntl	1:178039062-178137465	1.63095e-05	7.55684	0.0010578
ENSRNOG00000008015	Fos	6:109300432-109303299	1.6576e-05	29.9926	0.00107297
ENSRNOG00000004662	AC115277.1	7:15385867-15386419	1.69157e-05	-8.45194	0.00109281
ENSRNOG00000014597	Irs1	9:88033667-88086488	1.96376e-05	8.42063	0.00125144
ENSRNOG00000018494	Ppp1r3c	1:255371809-255376833	2.01432e-05	3.49757	0.00128118
ENSRNOG00000042838	Junb	19:26092973-26094756	2.05848e-05	4.16336	0.00130674
ENSRNOG00000032871	Mlc1	7:129949966-129970550	2.31299e-05	-5.63673	0.00144008
ENSRNOG00000000521	Cdkn1a	20:6351457-6358864	2.34953e-05	9.39605	0.00145499
ENSRNOG00000046950	LOC100912481	4:24612204-24640686	2.44472e-05	-3.73907	0.00150261
ENSRNOG00000009920	LOC680121	11:13499163-13501263	2.49096e-05	2.22122	0.00152818
ENSRNOG00000009884	Lgals1	7:120153183-120156289	2.50036e-05	-3.28873	0.00152958
ENSRNOG00000028100	Pex11g	12:2000426-2007516	2.61552e-05	-2.99441	0.00158683
ENSRNOG00000010235	Pkig	3:160047295-160115177	2.79906e-05	-2.00779	0.00168673
ENSRNOG00000046449	Npy	4:79573997-79581208	2.98611e-05	-5.05561	0.00178531
ENSRNOG00000049132	Map2k3	10:45089463-45110787	3.22503e-05	-2.47769	0.00191393
ENSRNOG00000020696	Pmvk	2:188784221-188793895	3.23034e-05	-2.0637	0.00191393
ENSRNOG00000027990	Crip1	6:137959170-137967042	3.24652e-05	-2.45603	0.00192006
ENSRNOG00000011542	Coa8	6:136185486-136210940	3.31498e-05	-2.05778	0.00195352
ENSRNOG00000016629	Tut7	17:5225834-5271794	3.34889e-05	3.65593	0.00196998
ENSRNOG00000055647	Rbfa	18:76704219-76714486	3.36376e-05	-2.13422	0.00197519
ENSRNOG00000053932	Ddx6	8:48925603-48958026	3.43906e-05	6.22854	0.00201222
ENSRNOG00000021924	Cyp2c22	1:259257656-259287684	3.49747e-05	-2.56613	0.00203553
ENSRNOG00000022054	Paqr7	5:152708774-152720229	3.9014e-05	-2.33882	0.00225465
ENSRNOG00000056670	AABR07000902.1	1:27924824-27927782	3.98146e-05	-5.04981	0.00229286
ENSRNOG00000021200	Hjv	2:198655436-198659317	4.07744e-05	-2.02754	0.00232666
ENSRNOG00000004342	Ahr	6:54963989-55001464	4.14365e-05	2.77699	0.00235329
ENSRNOG00000000967	Aacs	12:36512392-36555694	4.16084e-05	-2.48514	0.00235898
ENSRNOG00000018755	Acss2	3:151032951-151075856	4.17086e-05	-2.44072	0.00236059
ENSRNOG00000046890	Abca6	10:98478066-98544447	4.30885e-05	2.60765	0.00241377
ENSRNOG00000019215	LOC100911730	1:214009783-214013765	4.33906e-05	-3.39954	0.00242655
ENSRNOG00000036971	Smim26	3:138765026-138766515	4.40673e-05	-2.01958	0.00245604
ENSRNOG00000032690	Ube2e2	15:7871496-7927939	4.45747e-05	-2.37812	0.0024695
ENSRNOG00000000201	Gsta5	8:85553733-85565179	4.46092e-05	-2.16653	0.0024695
ENSRNOG00000019996	Slc16a1	2:207108551-207128554	4.75678e-05	3.24244	0.00261131
ENSRNOG00000057470	Pla2g12a	2:235311718-235327972	4.88923e-05	3.07124	0.00267305
ENSRNOG00000009117	Otub2	6:127282465-127301083	4.90188e-05	-2.86953	0.00267311
ENSRNOG00000017473	Ttc25	10:88459489-88488237	4.97586e-05	-6.13817	0.00270896
ENSRNOG00000054978	H1f2	17:43639748-43640387	5.23794e-05	-2.52856	0.00284223
ENSRNOG00000012659	Vamp5	4:100231560-100232559	5.27027e-05	-2.50909	0.00285506
ENSRNOG00000033680	Cyp2b1	7:99142449-99181783	5.30009e-05	-23.9348	0.00286179
ENSRNOG00000056076	LOC103694877	AABR07024106.1:11533-12195	5.59788e-05	-2.31607	0.00298823
ENSRNOG00000046379	Srm	3:14588869-14591974	5.75338e-05	-3.96008	0.0030613
ENSRNOG00000006589	Mif	20:13732197-13732859	5.90403e-05	-2.33587	0.00312126
ENSRNOG00000049128	Nktr	8:130366774-130393178	6.0176e-05	6.36242	0.00316307
ENSRNOG00000005918	RGD1563941	8:52829084-52830609	6.0216e-05	-2.31919	0.00316307
ENSRNOG00000050500	Tob2	7:123079536-123088279	6.10933e-05	5.67578	0.00320404
ENSRNOG00000019485	Bckdk	1:199351627-199356881	6.47071e-05	-2.59178	0.00337205
ENSRNOG00000049593	Wbp11l1	4:170772162-170810080	6.66138e-05	-7.64562	0.00346045
ENSRNOG00000010558	Ppif	16:1979190-1985908	7.25542e-05	-2.0345	0.00373365
ENSRNOG00000054549	Lss	20:12842883-12870497	7.45222e-05	-2.41984	0.00382441
ENSRNOG00000016924	Acly	10:88392247-88442845	7.48074e-05	-2.97593	0.00382565
ENSRNOG00000060728	Tuba1a	7:140637286-140640953	7.65177e-05	-2.42605	0.00389494
ENSRNOG00000048989	Larp7	2:231867134-231881939	8.5087e-05	-2.18284	0.00425862
ENSRNOG00000004624	Rnd3	3:36642586-36660758	8.53872e-05	2.40197	0.00426716
ENSRNOG00000009741	Cyp4a3	5:134469269-134484839	8.55698e-05	2.54995	0.00426979
ENSRNOG00000048949	LOC102549542	2:234375314-234483149	8.81991e-05	-3.30614	0.00438767
ENSRNOG00000003620	Fmo3	13:80837419-80862963	8.93721e-05	2.02044	0.00442301
ENSRNOG00000043098	Mt2A	19:11307966-11308740	9.43572e-05	4.88477	0.00463789
ENSRNOG00000031421	Eif1a	18:40586314-40597671	9.99909e-05	2.31623	0.00487834
ENSRNOG00000020373	Dap3	2:188225612-188252725	0.000101534	-2.21243	0.00493165
ENSRNOG00000013498	Pex14	5:165782894-165918445	0.000101884	-2.00202	0.00493411
ENSRNOG00000048088	Mest	4:58053040-58063138	0.000105633	7.01059	0.00510061
ENSRNOG00000006779	Crot	4:22081603-22116265	0.000109782	2.56075	0.00525467
ENSRNOG00000012826	Creb3l2	4:64869025-64981384	0.000114409	4.83754	0.00545235
ENSRNOG00000001285	Atp2a2	12:39553902-39603326	0.000118298	2.27175	0.00562952
ENSRNOG00000013911	Nagk	4:115473810-115481438	0.000121846	-2.53696	0.00574843
ENSRNOG00000048152	Myo1b	9:54558201-54766054	0.000122316	2.63334	0.00576233
ENSRNOG00000012772	Nqo1	19:38422163-38437180	0.000125137	-2.39865	0.00587839
ENSRNOG00000015222	Tent5c	2:202798197-202816562	0.000126298	4.22729	0.00592446
ENSRNOG00000062125	Aox3	9:65013861-65099433	0.000141427	2.87447	0.00655929
ENSRNOG00000060087	Adra1b	10:29392761-29450644	0.000142127	-2.06099	0.00657225
ENSRNOG00000002832	Slc16a2	X:74577130-74706214	0.000143872	2.49316	0.00660748
ENSRNOG00000008012	Abcb4	4:22133520-22425515	0.000144561	3.38493	0.00662985
ENSRNOG00000001582	Bach1	11:27364915-27398842	0.000145836	8.87716	0.006679
ENSRNOG00000020775	Cyp2b2	1:83103924-83119193	0.000148533	-2.40682	0.0067836
ENSRNOG00000013552	Scd	1:264160128-264172729	0.000150026	-3.58983	0.00684232
ENSRNOG00000032585	AABR07048992.1	5:99031012-99033107	0.000159499	-2.45095	0.00722427
ENSRNOG00000059255	Rnu3a	20:45357178-45357393	0.000161279	-33.125	0.00727483
ENSRNOG00000020194	Hes6	9:98549704-98551438	0.00016393	-4.03012	0.00736409
ENSRNOG00000045924	RT1-T24-3	20:3226312-3233694	0.000172777	-3.34957	0.0076984
ENSRNOG00000004287	Wdr83	19:26188637-26194198	0.000178288	-2.44371	0.00792251
ENSRNOG00000009152	Caprin1	3:93702486-93789617	0.000191846	2.16014	0.00842254
ENSRNOG00000004306	Zbtb39	7:71036564-71044045	0.00019426	4.4812	0.00851715
ENSRNOG00000012736	Znrd2	1:221087802-221089586	0.000197451	-2.31716	0.00863402
ENSRNOG00000055765	Rasl10b	KL568414.1:23533-32066	0.000218096	-2.32075	0.00937778
ENSRNOG00000010944	Hyou1	8:48699768-48711910	0.000218167	2.78979	0.00937778
ENSRNOG00000033100	AABR07054189.1	3:143828610-143829156	0.000221061	-4.52904	0.00947738
ENSRNOG00000011497	Aldh1b1	5:61382350-61387358	0.000227587	-2.73778	0.00968143
ENSRNOG00000009488	Cyp7a1	5:19358733-19368431	0.000239359	-2.87344	0.0101559
ENSRNOG00000011276	Tmem254	16:3817401-3821270	0.000241006	-2.00432	0.0101864
ENSRNOG00000007927	Mettl7b	7:3383878-3386522	0.000246799	-2.05854	0.0103779
ENSRNOG00000020060	Atf5	1:100808240-100810522	0.00025344	2.21241	0.0106164
ENSRNOG00000059017	AC106292.2	11:65743891-65745038	0.00025554	3.74543	0.0106907
ENSRNOG00000010643	Kank2	8:22791994-22821397	0.000264432	-2.546	0.0109928
ENSRNOG00000000414	Cep85l	20:34575949-34684418	0.000276114	11.8086	0.011392
ENSRNOG00000016119	Fzd7	9:66305730-66308550	0.000276114	8.90764	0.011392
ENSRNOG00000005447	Ypel2	10:74243811-74298599	0.000279321	5.48493	0.0114811
ENSRNOG00000008553	Mthfr	5:164845924-164860910	0.000279321	5.55708	0.0114811
ENSRNOG00000025406	Iqgap2	2:26167198-26438790	0.000283746	2.77918	0.0116194
ENSRNOG00000029668	Wfdc21	10:71047309-71053191	0.00028814	-2.55516	0.0117847
ENSRNOG00000008209	St3gal1	7:107895044-107963142	0.000289108	2.52435	0.0118096
ENSRNOG00000050181	LOC100911881	1:214476386-214511529	0.000291048	-2.06852	0.0118594
ENSRNOG00000008873	Ino80b	4:113954612-113957774	0.000304877	-2.40831	0.0123188
ENSRNOG00000016246	Tshz1	18:80862371-80865584	0.000328077	4.39005	0.0130941
ENSRNOG00000002609	Ero1b	17:90710554-90756048	0.000330657	2.68964	0.0131613
ENSRNOG00000046560	AC109096.1	1:220836091-220836504	0.000333935	-3.31917	0.0132288
ENSRNOG00000001441	Tmem120a	12:23989595-23998254	0.000343992	-2.07107	0.013563
ENSRNOG00000020246	Myl9	3:152857591-152863960	0.000352335	-2.04078	0.0138421
ENSRNOG00000015195	Hdhd3	5:78358202-78361647	0.000360264	-2.72187	0.0141198
ENSRNOG00000046643	Cyp3a9	12:19074582-19114399	0.000369079	2.47397	0.0144081
ENSRNOG00000023271	Parl	11:84517367-84544462	0.000369371	-2.11547	0.0144081
ENSRNOG00000001989	Alcam	11:50781126-50985083	0.00037282	2.15711	0.0145082
ENSRNOG00000001607	Adamts1	11:25342125-25350974	0.000377273	4.1556	0.0146642
ENSRNOG00000012314	Slirp	6:111476767-111486039	0.000390167	-2.48707	0.0150585
ENSRNOG00000016298	Lysmd3	2:9526208-9534362	0.000394849	3.53339	0.0152214
ENSRNOG00000008487	Amotl2	8:111209907-111226226	0.000422012	3.65223	0.01608
ENSRNOG00000057626	Kif1b	5:165938575-166133491	0.00045688	-2.24567	0.0172487
ENSRNOG00000013954	Alpl	5:156086496-156141537	0.000491667	-5.03469	0.0183097
ENSRNOG00000003714	Clk4	10:36715564-36733133	0.000492243	2.078	0.0183104
ENSRNOG00000012274	Ddi2	5:160230954-160282810	0.000499659	2.0178	0.0184731
ENSRNOG00000019407	Dmap1	5:136533791-136541795	0.000503698	-2.3506	0.0185477
ENSRNOG00000013376	Mvd	19:55258904-55268951	0.000517333	-2.1349	0.0189649
ENSRNOG00000051171	G6pc	10:89285854-89296213	0.000521239	2.53083	0.0190655
ENSRNOG00000029223	Prss32	10:13196945-13202392	0.000529323	-3.05106	0.0193182
ENSRNOG00000014478	Fndc3a	15:54381043-54528480	0.000530454	3.95923	0.0193381
ENSRNOG00000009639	Zrsr1	14:107750161-107751892	0.000550905	4.52833	0.020017
ENSRNOG00000009068	Phlda3	13:52588916-52592001	0.000555101	-2.26129	0.0201472
ENSRNOG00000008331	Washc4	7:26311093-26361221	0.000561267	3.57162	0.0203262
ENSRNOG00000002871	Rbm25l1	10:10457319-10460756	0.000590142	-2.27447	0.0213129
ENSRNOG00000051850	Scarna2	2:211344016-211344432	0.00060467	-3.62391	0.0217542
ENSRNOG00000020799	LOC103690054	1:88686730-88688258	0.000704577	-2.01289	0.0247264
ENSRNOG00000037087	LOC108351584	7:127081425-127081704	0.000724965	-4.01462	0.0253337
ENSRNOG00000003679	Med13	10:73702326-73787083	0.000732496	7.71	0.0255255
ENSRNOG00000056462	Tmf1	4:129521990-129544506	0.000797092	2.91859	0.0274458
ENSRNOG00000045539	Dusp11	4:117617532-117631716	0.000819739	2.23216	0.0280494
ENSRNOG00000007607	Nr4a1	7:142905757-142920216	0.000894239	11.7268	0.0301593
ENSRNOG00000049324	Tspan4	1:214016896-214038723	0.000919411	-3.95235	0.030807
ENSRNOG00000019383	Tef	7:123043502-123058604	0.000937798	-2.4929	0.0312671
ENSRNOG00000061813	Ly6c	KL567988.1:20092-23908	0.000938498	-3.79592	0.0312671
ENSRNOG00000050183	RT1-CE1	20:4638662-4943564	0.000950592	-2.35443	0.031606
ENSRNOG00000029341	AABR07036375.1	12:40685889-40686249	0.000979251	-10.5443	0.03233
ENSRNOG00000030374	LOC100360750	13:47380405-47382955	0.000991589	-2.04037	0.0327045
ENSRNOG00000019426	Ramac	1:143583674-143589556	0.00107087	-2.04677	0.0348255
ENSRNOG00000004649	Il1b	3:121876262-121882726	0.00110663	3.29646	0.0358312
ENSRNOG00000060063	Naa10	X:156863753-156868950	0.0011625	-2.06496	0.037149
ENSRNOG00000004563	Sec24a	10:37139805-37215899	0.0012087	3.14477	0.0385505
ENSRNOG00000002991	Srr	10:61756137-61772293	0.0012611	2.13735	0.0398738
ENSRNOG00000053891	AABR07018078.1	15:38647778-38709984	0.00126996	-2.0455	0.0400001
ENSRNOG00000018903	Pik3r1	2:31745087-31826867	0.00131785	2.34017	0.0412865
ENSRNOG00000009145	Klf12	15:84324469-84748525	0.00131834	6.55462	0.0412865
ENSRNOG00000002408	Rbm47	14:43810118-43837662	0.0013792	3.3041	0.0429065
ENSRNOG00000013195	Ruvbl1	4:120411990-120447455	0.00139025	-2.01487	0.043128
ENSRNOG00000001926	Cldn1	11:77815180-77830416	0.00147163	2.6599	0.0447655
ENSRNOG00000037911	LOC680227	X:74304291-74345507	0.00149764	5.41488	0.0452638
ENSRNOG00000006338	Lrp6	4:168194926-168323751	0.0015534	4.57646	0.0465213
ENSRNOG00000001060	Snrnp35	12:37531094-37538403	0.00158554	-2.25737	0.0473546
ENSRNOG00000019915	Xrcc1	1:81413352-81441678	0.00164227	-2.02425	0.0488271

## Sheet: Liver_CT_vs_H120
Summary of DEIDEGs identified in liver at CT vs. H120.
Feature ID	Gene name	Position	P-value	Fold change	FDR
ENSRNOG00000045636	Fasn	10:109987734-110005901	5.31751e-31	-6.60775	1.74856e-26
ENSRNOG00000027784	Tsku	1:163317281-163328591	4.0439e-23	-4.48625	4.43252e-19
ENSRNOG00000026965	Tmem140	4:62380913-62391912	1.06771e-20	4.20462	8.77738e-17
ENSRNOG00000013376	Mvd	19:55258904-55268951	4.10275e-20	-4.37455	2.24851e-16
ENSRNOG00000016924	Acly	10:88392247-88442845	4.08504e-20	-4.14041	2.24851e-16
ENSRNOG00000003597	Tuba4a	9:82415604-82419288	3.36128e-19	-3.42395	1.57898e-15
ENSRNOG00000020480	Fads1	1:226234073-226249138	8.71625e-19	-2.13791	3.18463e-15
ENSRNOG00000010478	LOC299282	6:127941525-128080889	1.13012e-18	2.27485	3.71618e-15
ENSRNOG00000028616	Pck1	3:171213935-171219871	1.97435e-17	9.7593	5.41022e-14
ENSRNOG00000058780	Igfbp1	14:87448691-87453785	1.9639e-17	5.72071	5.41022e-14
ENSRNOG00000049075	Fabp5	2:93981655-93985378	2.70186e-17	-6.23867	6.83424e-14
ENSRNOG00000000902	Hsph1	12:6322667-6341902	3.68958e-17	9.43157	8.66602e-14
ENSRNOG00000021027	Dbp	1:101687854-101692846	6.70204e-17	-14.4657	1.46922e-13
ENSRNOG00000003228	Mid1ip1	X:13114568-13116743	4.54863e-16	-3.97908	8.79839e-13
ENSRNOG00000022268	Pnpla3	7:125034763-125055976	1.01129e-15	-22.2633	1.84746e-12
ENSRNOG00000034116	Gk	X:54227396-54303864	1.31561e-15	4.56712	2.27691e-12
ENSRNOG00000056457	Gpd1	7:141370490-141377928	1.47288e-15	-2.61048	2.42164e-12
ENSRNOG00000052142	Ahsa2	14:108265206-108273938	5.35572e-15	4.40464	8.00509e-12
ENSRNOG00000018755	Acss2	3:151032951-151075856	9.35593e-15	-2.783	1.33761e-11
ENSRNOG00000016122	Hmgcr	2:27480225-27500654	7.39632e-14	-6.82335	1.01339e-10
ENSRNOG00000002520	Litaf	10:4719712-4763510	1.09574e-13	4.55184	1.44125e-10
ENSRNOG00000053086	Selenop	2:53109683-53114858	1.23775e-13	2.83019	1.56542e-10
ENSRNOG00000048088	Mest	4:58053040-58063138	1.99812e-13	34.2366	2.43348e-10
ENSRNOG00000059714	Hsp90aa1	6:135107270-135112775	2.63648e-13	3.84121	2.9895e-10
ENSRNOG00000020704	Tkfc	1:226644199-226657408	3.86516e-13	-2.81734	4.2366e-10
ENSRNOG00000053362	Gabarapl1	4:163293723-163302858	5.98395e-13	2.58784	6.34742e-10
ENSRNOG00000000967	Aacs	12:36512392-36555694	7.08969e-13	-5.95063	7.28532e-10
ENSRNOG00000000053	Crp	13:91054973-91093713	1.23273e-12	2.99299	1.15816e-09
ENSRNOG00000012404	Thrsp	1:162381252-162385575	1.54765e-12	-3.64779	1.37544e-09
ENSRNOG00000002478	Insig2	13:37266311-37287458	2.47756e-12	3.07476	2.14393e-09
ENSRNOG00000009488	Cyp7a1	5:19358733-19368431	2.86255e-12	-5.52618	2.41357e-09
ENSRNOG00000022392	Hspb8	12:45905370-45920013	3.31444e-12	3.26774	2.72472e-09
ENSRNOG00000058646	Zfp36l1	6:103308044-103313074	4.75766e-12	3.66477	3.81576e-09
ENSRNOG00000020420	Pklr	2:188449209-188459592	4.91202e-12	-3.06334	3.84576e-09
ENSRNOG00000049814	LOC100910882	3:152226709-152259156	5.07325e-12	69.1446	3.87962e-09
ENSRNOG00000032297	Msmo1	16:26859396-26875973	7.15069e-12	-2.6824	5.2674e-09
ENSRNOG00000042344	Smim22	10:10766207-10767389	7.20837e-12	-3.25129	5.2674e-09
ENSRNOG00000015195	Hdhd3	5:78358202-78361647	1.06783e-11	-4.14801	7.45761e-09
ENSRNOG00000023546	Hspb1	12:23839398-23841049	1.19931e-11	16.3364	8.04836e-09
ENSRNOG00000001142	Prkab1	12:46316235-46326790	1.41342e-11	-3.17227	9.29548e-09
ENSRNOG00000034093	AABR07011951.1	2:177651240-177653288	2.59162e-11	3.73719	1.60793e-08
ENSRNOG00000036693	Slc25a10	10:109665681-109673143	2.5788e-11	-2.72175	1.60793e-08
ENSRNOG00000019189	Acat2	1:47972398-47992653	3.30279e-11	-3.46279	2.01122e-08
ENSRNOG00000003977	Dusp1	10:16970625-16973418	4.04603e-11	6.43244	2.41901e-08
ENSRNOG00000046727	Abcc2	1:263554452-263613252	8.13161e-11	2.27605	4.77485e-08
ENSRNOG00000017693	Slc2a5	5:167141874-167174310	8.35571e-11	-7.3555	4.82036e-08
ENSRNOG00000042838	Junb	19:26092973-26094756	1.17126e-10	4.94731	6.64043e-08
ENSRNOG00000016791	Chka	1:219077770-219126220	1.5635e-10	4.59787	8.60545e-08
ENSRNOG00000022054	Paqr7	5:152708774-152720229	1.88043e-10	-4.72856	1.01368e-07
ENSRNOG00000012929	Wsb1	10:66586923-66602987	3.41006e-10	3.21452	1.77989e-07
ENSRNOG00000010658	LOC103691744	2:264266983-264293046	3.59268e-10	3.05619	1.84591e-07
ENSRNOG00000011016	Slc7a2	16:54460066-54513349	4.0455e-10	4.81166	2.04317e-07
ENSRNOG00000016831	Serpinh1	1:164301009-164308317	4.10089e-10	2.99021	2.04317e-07
ENSRNOG00000011250	Inmt	4:85381888-85386231	4.9422e-10	-43.7542	2.38992e-07
ENSRNOG00000007229	Nr0b2	5:151776003-151779319	5.67341e-10	-4.94684	2.70375e-07
ENSRNOG00000021824	Dnajb1	19:24747177-24750919	6.10062e-10	5.65645	2.86581e-07
ENSRNOG00000003620	Fmo3	13:80837419-80862963	7.82817e-10	2.34712	3.62555e-07
ENSRNOG00000029993	Kynu	3:28416953-28566928	8.4494e-10	2.42204	3.85891e-07
ENSRNOG00000020029	Mcrip2	10:15230800-15235740	9.47236e-10	-3.45426	4.26684e-07
ENSRNOG00000020194	Hes6	9:98549704-98551438	9.91116e-10	-3.58947	4.40417e-07
ENSRNOG00000020696	Pmvk	2:188784221-188793895	1.35092e-09	-2.06465	5.92298e-07
ENSRNOG00000034066	Hspa8	8:44990013-44993179	1.42139e-09	5.36812	6.07009e-07
ENSRNOG00000015774	Mreg	9:79490049-79545024	1.46564e-09	2.8651	6.17881e-07
ENSRNOG00000003232	Slc9a3r1	10:103713044-103730145	1.58563e-09	-2.565	6.60005e-07
ENSRNOG00000010887	RGD1309534	8:13838571-13861212	1.65637e-09	-4.04048	6.80829e-07
ENSRNOG00000007545	Angptl4	7:18627807-18634079	2.34664e-09	2.49739	9.41033e-07
ENSRNOG00000002572	Cacybp	13:77948770-77959110	3.81973e-09	2.37094	1.4777e-06
ENSRNOG00000007040	Timm17a	13:52124634-52136127	3.90253e-09	-2.96243	1.49217e-06
ENSRNOG00000028092	Cpa2	4:57855415-57879239	3.96802e-09	2.94269	1.49977e-06
ENSRNOG00000016552	Hmgcs1	2:52431600-52445055	4.31329e-09	-3.09472	1.61175e-06
ENSRNOG00000009565	Pdk4	4:30546663-30556814	5.06256e-09	4.22084	1.84969e-06
ENSRNOG00000019481	Cyp8b1	8:130548417-130550388	5.87027e-09	2.7206	2.12123e-06
ENSRNOG00000006305	Slc38a2	7:138088648-138100841	7.79692e-09	3.87594	2.75684e-06
ENSRNOG00000016166	Pdlim1	1:259308295-259357056	7.79405e-09	-2.4616	2.75684e-06
ENSRNOG00000009715	Me1	8:94256838-94368834	8.92131e-09	-4.04504	3.12085e-06
ENSRNOG00000002839	Slc19a2	13:82552549-82566586	9.74806e-09	2.33899	3.33902e-06
ENSRNOG00000021405	Cyp2c7	1:148053686-148119857	1.07558e-08	2.1304	3.60902e-06
ENSRNOG00000028668	Slc28a2	3:114355797-114647382	1.2247e-08	3.28554	4.06786e-06
ENSRNOG00000051615	Hmgn2	5:152195360-152198813	1.24551e-08	-2.16141	4.09561e-06
ENSRNOG00000021164	Stip1	1:222274132-222293148	1.58783e-08	2.40981	5.16957e-06
ENSRNOG00000012274	Ddi2	5:160230954-160282810	1.79581e-08	2.98107	5.73318e-06
ENSRNOG00000011668	Nfil3	17:12261101-12276315	2.06122e-08	2.86664	6.51723e-06
ENSRNOG00000014448	Arntl	1:178039062-178137465	2.12162e-08	9.43649	6.64431e-06
ENSRNOG00000014117	Hmox1	19:14508615-14515456	2.20877e-08	3.60599	6.85199e-06
ENSRNOG00000009094	Nudt4	7:36643915-36660141	2.82572e-08	2.15689	8.68393e-06
ENSRNOG00000012106	Dnaja4	8:59278261-59294003	2.99631e-08	8.29056	9.12293e-06
ENSRNOG00000008474	Acox3	14:80314430-80355420	3.03672e-08	2.5155	9.16115e-06
ENSRNOG00000018494	Ppp1r3c	1:255371809-255376833	3.66785e-08	2.66735	1.06735e-05
ENSRNOG00000031769	Chchd7	5:16845630-16847776	4.21385e-08	-3.25351	1.21547e-05
ENSRNOG00000019742	Stat3	10:88790407-88842233	4.48972e-08	2.61825	1.28379e-05
ENSRNOG00000030538	Slco1b2	4:175814117-175881768	6.28607e-08	2.44831	1.73181e-05
ENSRNOG00000038012	Commd6	15:86136095-86142672	7.34505e-08	-2.57193	1.9478e-05
ENSRNOG00000030391	Ei24	8:39254888-39266959	7.67129e-08	2.17761	2.01804e-05
ENSRNOG00000007139	Ttpa	5:34007919-34028452	8.52823e-08	2.36899	2.22566e-05
ENSRNOG00000019834	Hsp90ab1	9:17817720-17823243	9.3508e-08	2.21583	2.42112e-05
ENSRNOG00000048949	LOC102549542	2:234375314-234483149	9.84849e-08	-3.75729	2.51045e-05
ENSRNOG00000013975	Acat2l1	1:47996520-48026268	1.1701e-07	-3.02277	2.95972e-05
ENSRNOG00000010224	Rab30	1:157573323-157660008	1.18889e-07	4.44692	2.98429e-05
ENSRNOG00000049900	Irf2bp2	19:59499875-59502161	1.56399e-07	3.99753	3.83796e-05
ENSRNOG00000020506	Khnyn	15:34552409-34561727	1.73171e-07	5.84996	4.21806e-05
ENSRNOG00000005615	Gadd45a	4:97782511-97784842	1.79059e-07	-2.8342	4.32941e-05
ENSRNOG00000012443	Cpt2	5:127505613-127523089	3.30515e-07	-2.29789	7.87559e-05
ENSRNOG00000056728	G6pd	X:156274799-156293926	3.40038e-07	-3.85297	8.04423e-05
ENSRNOG00000000827	Ier3	20:3438797-3440769	3.5879e-07	2.16119	8.33679e-05
ENSRNOG00000001797	Umps	11:70034138-70044628	4.06945e-07	-2.256	9.18404e-05
ENSRNOG00000047706	LOC103690108	20:3791406-3794027	4.0777e-07	3.39273	9.18404e-05
ENSRNOG00000012123	Fdx1	8:56373722-56393233	4.37205e-07	2.28812	9.78001e-05
ENSRNOG00000023150	Gpi	1:90063410-90091287	5.30533e-07	-2.0803	0.000116304
ENSRNOG00000014806	Pnkd	9:81566073-81634534	6.22836e-07	2.28912	0.000133861
ENSRNOG00000022657	Tmem97	10:65811455-65820538	6.64515e-07	-2.00621	0.000140976
ENSRNOG00000046379	Srm	3:14588869-14591974	7.34035e-07	-7.27784	0.000154237
ENSRNOG00000005447	Ypel2	10:74243811-74298599	7.97315e-07	8.54354	0.000164894
ENSRNOG00000014532	Lbp	3:154786214-154813464	8.18971e-07	2.56431	0.000167269
ENSRNOG00000011497	Aldh1b1	5:61382350-61387358	8.32709e-07	-2.64076	0.000169024
ENSRNOG00000019428	Higd1a	8:130482492-130491998	8.6202e-07	-2.13031	0.000173901
ENSRNOG00000032917	Zfand2a	12:17252092-17263477	8.86039e-07	10.5864	0.000177656
ENSRNOG00000008245	AABR07054614.1	3:163950776-163986059	9.55892e-07	-5.21989	0.000187099
ENSRNOG00000029360	Serinc1	20:38967237-38985036	9.53044e-07	2.43629	0.000187099
ENSRNOG00000053210	Zc3h11a	13:50196041-50234862	9.53321e-07	3.08028	0.000187099
ENSRNOG00000057333	AABR07030184.1	10:74765384-74765600	1.14802e-06	-15.2311	0.000220762
ENSRNOG00000009446	Rxra	3:6211788-6295908	1.25732e-06	2.45513	0.000238986
ENSRNOG00000020298	Bag3	1:199941160-199965191	1.63513e-06	5.55942	0.000303773
ENSRNOG00000007029	Dnaja1	5:57028466-57039378	1.86066e-06	2.34535	0.000339912
ENSRNOG00000029698	Pim3	7:129860113-129863441	1.85102e-06	2.83808	0.000339912
ENSRNOG00000017523	H6pd	5:166998880-167030441	1.92805e-06	2.29109	0.000348353
ENSRNOG00000057832	Rnf125	18:15192961-15225427	2.12669e-06	3.72488	0.000382142
ENSRNOG00000042821	Cd59	3:94010474-94028621	2.17762e-06	2.29046	0.000389167
ENSRNOG00000036837	Nfe2	7:144872746-144880092	2.25316e-06	-6.93142	0.000399303
ENSRNOG00000002802	Cxcl1	14:18743684-18745457	2.32651e-06	5.78053	0.000406929
ENSRNOG00000011696	Lifr	2:56426366-56489415	2.4174e-06	2.86601	0.000420589
ENSRNOG00000004377	Lpin1	6:41799748-41870046	2.4914e-06	4.09311	0.000431183
ENSRNOG00000016456	Il33	1:248132089-248147029	2.56109e-06	-2.00442	0.000438627
ENSRNOG00000004659	Creld2	7:129812788-129819634	2.75613e-06	2.52756	0.000469585
ENSRNOG00000029668	Wfdc21	10:71047309-71053191	2.88186e-06	-3.16615	0.000481037
ENSRNOG00000009994	Dlat	8:55062550-55087832	3.77419e-06	-3.18437	0.000611363
ENSRNOG00000033195	A1cf	1:250426157-250514866	4.09381e-06	4.86491	0.00065348
ENSRNOG00000013133	Foxa2	3:142383277-142387481	4.21927e-06	-2.62639	0.000670252
ENSRNOG00000009875	Akr1b7	4:61850347-61862526	4.31483e-06	2.27935	0.000682137
ENSRNOG00000053452	LOC100361457	3:75643053-75644954	4.53935e-06	-2.73459	0.000714064
ENSRNOG00000020060	Atf5	1:100808240-100810522	4.70468e-06	2.35493	0.000733195
ENSRNOG00000016690	Idi1	17:57976267-57984036	4.76292e-06	-2.24383	0.000738769
ENSRNOG00000033740	Lurap1l	5:98469046-98515125	4.81277e-06	2.20007	0.000742997
ENSRNOG00000010558	Ppif	16:1979190-1985908	5.07902e-06	-2.15628	0.000776806
ENSRNOG00000047816	Ccs	1:220075246-220096404	5.84399e-06	-2.15795	0.000885567
ENSRNOG00000005861	Hsd11b1	13:111926441-111972603	6.02172e-06	-3.03749	0.000908313
ENSRNOG00000010643	Kank2	8:22791994-22821397	6.54673e-06	-3.44196	0.000982996
ENSRNOG00000021240	Atrn	3:123434408-123567918	6.7444e-06	2.89193	0.00100807
ENSRNOG00000010944	Hyou1	8:48699768-48711910	6.99904e-06	2.26304	0.0010414
ENSRNOG00000010951	Cmtm6	8:122789452-122807560	7.64039e-06	2.40671	0.00112663
ENSRNOG00000019383	Tef	7:123043502-123058604	8.02885e-06	-3.4028	0.00117863
ENSRNOG00000049236	Myh9l1	7:118992355-119071712	8.29636e-06	3.23906	0.00121023
ENSRNOG00000001738	Eif4g1	11:83908108-83926524	8.64265e-06	2.65981	0.00125197
ENSRNOG00000023360	Fus	1:199412833-199426702	9.41312e-06	-2.26918	0.00133419
ENSRNOG00000049132	Map2k3	10:45089463-45110787	9.38659e-06	-2.4929	0.00133419
ENSRNOG00000003302	Flcn	10:46153187-46172309	1.00198e-05	2.91238	0.00139022
ENSRNOG00000009550	Sqle	7:99609190-99624732	1.02621e-05	-2.25109	0.00141192
ENSRNOG00000013963	Il6st	2:44289392-44314944	1.0544e-05	3.7572	0.00143867
ENSRNOG00000006663	Usp2	8:48406259-48430885	1.06031e-05	-9.39549	0.00144075
ENSRNOG00000000521	Cdkn1a	20:6351457-6358864	1.12832e-05	5.81776	0.00151071
ENSRNOG00000008074	Cyp11a1	8:62779874-62809893	1.13017e-05	14.6611	0.00151071
ENSRNOG00000043193	Smim1	5:171309334-171312026	1.25021e-05	-2.44706	0.00164442
ENSRNOG00000004342	Ahr	6:54963989-55001464	1.27788e-05	2.88252	0.00167412
ENSRNOG00000046643	Cyp3a9	12:19074582-19114399	1.33528e-05	2.53984	0.00173549
ENSRNOG00000020624	Acadsb	1:201981356-202021008	1.51212e-05	3.23377	0.00194231
ENSRNOG00000026643	Chordc1	8:17421556-17446165	1.57676e-05	2.44879	0.00200188
ENSRNOG00000011269	Sult1c3	9:4930817-4978892	1.6572e-05	-2.62443	0.00207713
ENSRNOG00000013907	Sall1	19:23389374-23405039	1.68689e-05	2.39111	0.00210113
ENSRNOG00000013552	Scd	1:264160128-264172729	1.69905e-05	-3.07369	0.00210547
ENSRNOG00000059330	AABR07004549.1	1:147422778-147435897	1.73699e-05	2.0092	0.00213924
ENSRNOG00000054549	Lss	20:12842883-12870497	1.77184e-05	-2.00768	0.00217401
ENSRNOG00000008510	Abtb2	3:93495105-93647721	1.88223e-05	3.33903	0.00227549
ENSRNOG00000038999	RT1-A1	20:5351604-5421098	1.8787e-05	2.03476	0.00227549
ENSRNOG00000007793	Pnrc1	5:48501471-48504511	2.18171e-05	2.07537	0.00258993
ENSRNOG00000002292	Hnrnpd	14:11256267-11274578	2.39682e-05	-2.3051	0.00277332
ENSRNOG00000016099	Id4	17:16692556-16695126	2.7243e-05	2.25693	0.00309977
ENSRNOG00000013328	Rbpms	16:61954589-62096497	2.79532e-05	2.46271	0.0031696
ENSRNOG00000020578	Ceacam1	1:82327954-82344345	2.97633e-05	2.07472	0.00336325
ENSRNOG00000050869	Cebpd	11:89008007-89009146	3.12485e-05	3.13963	0.00349505
ENSRNOG00000005266	Amdhd1	7:34361632-34406318	3.2589e-05	2.36911	0.00359605
ENSRNOG00000016957	Igfbp2	9:80118028-80144789	3.3737e-05	-3.08004	0.00371028
ENSRNOG00000009088	Txnrd1	7:26946124-26984400	3.70316e-05	2.10822	0.00405903
ENSRNOG00000003334	Klhl21	5:169181417-169190073	4.27785e-05	3.53824	0.00456744
ENSRNOG00000017473	Ttc25	10:88459489-88488237	4.97161e-05	-7.06707	0.00523978
ENSRNOG00000019638	Lmna	2:187842884-187863516	5.27029e-05	-2.27953	0.0055192
ENSRNOG00000032708	RT1-Bb	20:4039412-4049711	5.46988e-05	2.14104	0.00567401
ENSRNOG00000033573	Sgk2	3:159368272-159384775	5.52479e-05	-4.10731	0.00571294
ENSRNOG00000031789	Rangap1	7:122940375-122967178	5.62586e-05	-2.00772	0.0057811
ENSRNOG00000048874	Gckr	6:26355295-26385761	6.06088e-05	2.0319	0.00611349
ENSRNOG00000004640	Mtfp1	14:84330217-84334066	6.52268e-05	-2.10114	0.00647992
ENSRNOG00000007763	Plod1	5:164720586-164747083	6.57348e-05	2.21588	0.00651071
ENSRNOG00000033680	Cyp2b1	7:99142449-99181783	7.10392e-05	-16.945	0.00697308
ENSRNOG00000013408	Npas2	9:45901740-46081880	7.67748e-05	14.304	0.00738183
ENSRNOG00000046975	Sult4a1	7:124958545-124982566	7.67748e-05	-14.2558	0.00738183
ENSRNOG00000001106	Denr	12:38096033-38116919	8.88314e-05	-2.12666	0.0084914
ENSRNOG00000018397	Dnph1	9:16845524-16848503	8.9495e-05	-2.14318	0.00853004
ENSRNOG00000057957	Crybg2	5:152290083-152321541	9.0969e-05	3.39731	0.00864238
ENSRNOG00000014828	Avpi1	1:261365589-261371508	9.14669e-05	-2.30466	0.00864283
ENSRNOG00000000520	Srsf3	20:6288266-6298213	9.38112e-05	-2.30959	0.00883895
ENSRNOG00000057601	AABR07044080.2	19:56443631-56443869	0.000101297	-3.61885	0.00942022
ENSRNOG00000019422	Egr1	18:27657627-27661429	0.000106676	-5.03781	0.00984509
ENSRNOG00000010107	AABR07025295.1	16:31734943-31946242	0.000107976	5.22974	0.00991778
ENSRNOG00000045924	RT1-T24-3	20:3226312-3233694	0.000111964	-3.57283	0.0101704
ENSRNOG00000055634	AABR07024908.1	16:21807190-21807526	0.000112999	-2.0037	0.0102363
ENSRNOG00000046112	Dedd2	1:82072543-82088275	0.000113707	3.05521	0.0102721
ENSRNOG00000020185	Wdr6	8:117358786-117366096	0.000135426	-4.14068	0.0120683
ENSRNOG00000051854	Enpep	2:233667253-233743866	0.000145513	2.00199	0.0127939
ENSRNOG00000008648	Mogs	4:113948513-113951847	0.000146636	-5.56468	0.0128582
ENSRNOG00000012100	Ssbp1	4:68634928-68645172	0.000170516	-2.09073	0.0147598
ENSRNOG00000008519	Dipk2a	8:102088504-102159828	0.000171855	3.6383	0.0148323
ENSRNOG00000001030	Tsc22d1	15:58554373-58658153	0.000174619	-2.1288	0.0150072
ENSRNOG00000033609	Irx1	1:33910911-33916741	0.000177528	-2.37624	0.0151627
ENSRNOG00000009639	Zrsr1	14:107750161-107751892	0.000181595	4.76534	0.0154699
ENSRNOG00000009734	Akr1b8	4:61771969-61828657	0.000183691	5.69768	0.0155678
ENSRNOG00000012826	Creb3l2	4:64869025-64981384	0.000194093	4.87062	0.0163232
ENSRNOG00000001926	Cldn1	11:77815180-77830416	0.000200202	3.02509	0.0166243
ENSRNOG00000029042	Mt-nd6	MT:13542-14061	0.000202678	-2.0373	0.0167034
ENSRNOG00000059255	Rnu3a	20:45357178-45357393	0.000216713	-31.8655	0.0176391
ENSRNOG00000037198	Usp18	4:153805992-153834430	0.000217487	-4.11683	0.0176584
ENSRNOG00000013954	Alpl	5:156086496-156141537	0.000222655	-9.67813	0.0179891
ENSRNOG00000023271	Parl	11:84517367-84544462	0.000226329	-2.24042	0.0181521
ENSRNOG00000028382	Rfxapl1	2:144213402-144217600	0.000245017	22.0505	0.0193675
ENSRNOG00000019639	Pgpep1	16:20521955-20531396	0.000252171	2.06572	0.0198377
ENSRNOG00000021678	Alkbh3	3:82874247-82906581	0.000252085	-2.06825	0.0198377
ENSRNOG00000019412	Rhbg	2:187610086-187622373	0.000303415	-2.56769	0.023042
ENSRNOG00000021575	Cfhr2	13:56642364-56693968	0.000314341	2.07624	0.0236533
ENSRNOG00000051171	G6pc	10:89285854-89296213	0.000313684	3.14085	0.0236533
ENSRNOG00000005387	Rbm3	X:15098903-15102340	0.000319154	-2.41671	0.0239606
ENSRNOG00000021680	Setdb2	15:39712860-39742103	0.000327821	4.58505	0.0242341
ENSRNOG00000004294	Ascl1	7:28038661-28040510	0.000330596	-3.10139	0.0243265
ENSRNOG00000000165	Pfkfb1	X:23092158-23144324	0.000331549	-2.04554	0.0243356
ENSRNOG00000012862	Spsb4	8:104840939-104912959	0.000339895	-3.0624	0.0246728
ENSRNOG00000002946	Socs3	10:106975177-106976040	0.000344266	4.03511	0.0248802
ENSRNOG00000004726	Mapkapk2	13:47785160-47831110	0.000349156	2.05235	0.0251783
ENSRNOG00000009117	Otub2	6:127282465-127301083	0.000352587	-2.46512	0.0253701
ENSRNOG00000033372	Klhl24	11:84615759-84633504	0.000358872	3.52958	0.0257325
ENSRNOG00000027434	Fitm2	3:159856993-159863506	0.00037778	-2.69477	0.0266578
ENSRNOG00000055079	Ndufaf2	2:39321740-39434560	0.000388169	-2.04305	0.0273322
ENSRNOG00000002278	Tec	14:37918651-38027925	0.000412368	2.3484	0.0287896
ENSRNOG00000019485	Bckdk	1:199351627-199356881	0.000416545	-2.24285	0.0290196
ENSRNOG00000015498	Il17rb	16:6064287-6077978	0.000431471	-3.20811	0.0298069
ENSRNOG00000017775	Slc5a1	14:82909980-82975263	0.000458797	12.753	0.0312352
ENSRNOG00000006924	Tmem125	5:137370576-137372993	0.000460685	-2.05623	0.031299
ENSRNOG00000002826	Hsd17b7	13:88288045-88307988	0.000469839	-2.73378	0.0316593
ENSRNOG00000057470	Pla2g12a	2:235311718-235327972	0.000487443	2.652	0.0327783
ENSRNOG00000000787	AABR07044364.1	20:3242469-3249189	0.000491393	-5.17166	0.0329302
ENSRNOG00000018109	Clic4	5:153568744-153625869	0.000551029	3.64147	0.0364577
ENSRNOG00000051170	Ddx17	7:120761825-120780641	0.000561697	2.59967	0.0370146
ENSRNOG00000042714	RGD1559459	14:22937420-22952822	0.000601572	2.49341	0.0390939
ENSRNOG00000003127	Spryd4	7:2621960-2623781	0.000632672	-2.25787	0.0408726
ENSRNOG00000001782	Osbpl11	11:70770506-70833577	0.000696777	-2.29282	0.0440603
ENSRNOG00000049604	Mvk	12:47904718-47919400	0.000723996	-2.05146	0.0450893
ENSRNOG00000012067	Fam111a	1:229003960-229019527	0.000728718	-25.3589	0.0452976
ENSRNOG00000002191	LOC498368	14:46050749-46054022	0.000789519	-2.51751	0.0483869

## Sheet: Adrenal_CT_vs_H30
Summary of DEIDEGs identified inadrenal glands at CT vs. H30.
Feature ID	Gene name	Position	P-value	Fold change	FDR
ENSRNOG00000048199	Rps19l2	9:16802318-16807966	9.40195e-23	24.9243	3.09164e-18
ENSRNOG00000033024	AC099453.1	5:78392714-78393143	2.57925e-20	-6.80082	4.24068e-16
ENSRNOG00000042838	Junb	19:26092973-26094756	7.66859e-20	11.0195	8.40554e-16
ENSRNOG00000020480	Fads1	1:226234073-226249138	7.34307e-19	-3.48361	6.03655e-15
ENSRNOG00000028690	LOC100362366	3:24600602-24601063	4.21901e-18	-5.31209	2.77467e-14
ENSRNOG00000015160	Gem	5:25349927-25353661	6.38297e-18	7.2524	3.49819e-14
ENSRNOG00000050647	Hspa1b	20:4877323-4879779	4.47161e-17	34.9988	1.838e-13
ENSRNOG00000001189	Sik1	20:10668410-10680283	2.1575e-15	6.5673	7.88277e-12
ENSRNOG00000056651	LOC103690068	1:88192369-88193346	1.18487e-14	14.1874	3.8962e-11
ENSRNOG00000019422	Egr1	18:27657627-27661429	2.42786e-14	7.85472	7.25775e-11
ENSRNOG00000032232	Snrpg	1:91588227-91588609	3.45704e-13	-37.2237	8.74445e-10
ENSRNOG00000009768	LOC100912228	4:79557853-79565097	3.10407e-12	33.2487	7.2908e-09
ENSRNOG00000033473	Rpl36	9:10441258-10441834	1.61779e-11	3.27129	3.32485e-08
ENSRNOG00000021027	Dbp	1:101687854-101692846	6.71554e-11	-4.21425	1.25422e-07
ENSRNOG00000055564	RGD1564664	3:82854776-82856171	6.86552e-11	4.89403	1.25422e-07
ENSRNOG00000021824	Dnajb1	19:24747177-24750919	7.5191e-11	8.19693	1.30132e-07
ENSRNOG00000033803	LOC100360841	9:69790830-69791196	1.3482e-10	-3.88246	2.20596e-07
ENSRNOG00000000321	Cd24	20:48335539-48340846	2.26566e-10	6.6953	3.38644e-07
ENSRNOG00000020938	Ppp1r15a	1:101511900-101514974	3.13124e-10	2.97845	4.47672e-07
ENSRNOG00000005615	Gadd45a	4:97782511-97784842	3.60298e-10	5.10599	4.93654e-07
ENSRNOG00000013408	Npas2	9:45901740-46081880	4.67393e-10	9.42449	5.69233e-07
ENSRNOG00000019584	Dlk1	6:133552820-133583751	4.44603e-10	2.49374	5.69233e-07
ENSRNOG00000037352	RGD1562747	8:69484173-69489891	5.69751e-10	5.52266	6.46039e-07
ENSRNOG00000013090	Gadd45g	17:13391466-13393243	6.58825e-10	5.6025	6.98844e-07
ENSRNOG00000003300	Btg2	13:50913179-50916982	1.30343e-09	3.21036	1.33939e-06
ENSRNOG00000031889	AABR07065438.1	6:128738387-128739319	1.51255e-09	-3.09484	1.44895e-06
ENSRNOG00000045683	LOC102553715	10:49000972-49003931	1.54223e-09	4.88925	1.44895e-06
ENSRNOG00000057078	Ddit4	20:29509288-29511382	1.97474e-09	5.5596	1.80376e-06
ENSRNOG00000014448	Arntl	1:178039062-178137465	2.5003e-09	7.4468	2.22209e-06
ENSRNOG00000014350	Ccn1	2:251529353-251532312	2.66625e-09	5.65456	2.24806e-06
ENSRNOG00000023546	Hspb1	12:23839398-23841049	2.61558e-09	2.8506	2.24806e-06
ENSRNOG00000003977	Dusp1	10:16970625-16973418	3.09336e-09	5.46233	2.48095e-06
ENSRNOG00000031506	Ftl1	5:152325870-152326778	3.09065e-09	2.73595	2.48095e-06
ENSRNOG00000017783	Sfrp1	16:73372006-73410777	3.25302e-09	3.51952	2.54688e-06
ENSRNOG00000021269	Chgb	3:125428259-125441594	5.20497e-09	4.85665	3.88989e-06
ENSRNOG00000033152	Rps18l1	10:104521699-104522241	5.8111e-09	3.4744	4.24636e-06
ENSRNOG00000025889	Gnas	3:172374956-172428483	6.66878e-09	4.59346	4.76716e-06
ENSRNOG00000052549	Chga	6:126434225-126445568	8.11992e-09	4.12088	5.56265e-06
ENSRNOG00000020298	Bag3	1:199941160-199965191	1.1636e-08	4.19897	7.50246e-06
ENSRNOG00000033299	Mt-atp8	MT:7757-7961	1.20976e-08	-4.08022	7.65013e-06
ENSRNOG00000014338	Slc25a25	3:11442396-11452529	1.68225e-08	3.89202	1.0244e-05
ENSRNOG00000011668	Nfil3	17:12261101-12276315	2.38977e-08	4.93526	1.42878e-05
ENSRNOG00000051286	LOC100911516	9:101106891-101107575	2.46634e-08	7.27534	1.44823e-05
ENSRNOG00000003515	Ephx1	13:99271365-99300579	2.57422e-08	-2.78273	1.48505e-05
ENSRNOG00000020410	Th	1:216073030-216080287	2.9088e-08	3.59512	1.64914e-05
ENSRNOG00000030447	AC105662.1	5:173148883-173149276	3.58796e-08	11.2397	1.96638e-05
ENSRNOG00000005359	Csrnp3	3:51883558-52120290	4.9296e-08	16.9124	2.49385e-05
ENSRNOG00000020763	Snrnp70	1:101367470-101388129	5.18784e-08	-2.01182	2.58472e-05
ENSRNOG00000012847	Scgb1c1	1:213595239-213596459	8.16068e-08	5.88538	3.8891e-05
ENSRNOG00000001889	Comt	11:86715980-86735622	1.14361e-07	2.41811	5.37221e-05
ENSRNOG00000014900	Crem	17:57031765-57090888	1.31418e-07	3.64098	6.00195e-05
ENSRNOG00000025235	Tmem130	12:11814070-11840100	1.65066e-07	4.41707	7.43544e-05
ENSRNOG00000016299	Klf4	5:72283312-72287669	1.69634e-07	5.39014	7.5372e-05
ENSRNOG00000046382	Gatd1	1:214389254-214394411	2.41686e-07	-37.6677	9.98722e-05
ENSRNOG00000057347	Cebpb	3:164424514-164425910	2.42976e-07	2.47681	9.98722e-05
ENSRNOG00000050869	Cebpd	11:89008007-89009146	2.58046e-07	3.44494	0.000104757
ENSRNOG00000005700	Nsg1	14:77380261-77401996	2.72555e-07	4.02232	0.000109298
ENSRNOG00000031851	Ndufa4l2	7:70821956-70824085	3.11864e-07	3.78053	0.000122084
ENSRNOG00000002343	Uchl1	14:43133217-43143973	3.17174e-07	3.58479	0.000122702
ENSRNOG00000008001	Rab3b	5:128501846-128568188	3.31711e-07	3.67553	0.000125375
ENSRNOG00000016460	Clu	15:42640145-42665857	3.28203e-07	2.29763	0.000125375
ENSRNOG00000019704	Resp18	9:82470758-82477181	4.1456e-07	3.7819	0.000152721
ENSRNOG00000019556	Cd9	4:157977161-158010166	4.33462e-07	2.33062	0.000156632
ENSRNOG00000015514	Bcat1	4:179259307-179339795	4.40175e-07	3.62108	0.000157329
ENSRNOG00000007544	Il23r	4:98203957-98305173	4.55456e-07	6.55533	0.000161041
ENSRNOG00000004284	Btg1	7:37812830-37815088	5.50728e-07	2.92557	0.000192655
ENSRNOG00000007808	Nap1l5	4:89149316-89151184	6.81356e-07	4.28434	0.000233386
ENSRNOG00000019383	Tef	7:123043502-123058604	7.2439e-07	-2.85253	0.000245568
ENSRNOG00000001128	Tesc	12:44141421-44174583	7.70256e-07	2.67645	0.000255842
ENSRNOG00000015055	Scg2	9:85237457-85243001	8.43758e-07	3.89205	0.000277453
ENSRNOG00000012477	Eef1a2	3:176657106-176666282	1.05395e-06	4.11743	0.000339776
ENSRNOG00000043451	Spp1	14:6673685-6679901	1.48125e-06	7.42777	0.000463886
ENSRNOG00000021812	Scx	7:117519074-117521093	1.58025e-06	6.0866	0.00049022
ENSRNOG00000011992	Slc18a1	16:22361997-22395183	1.68291e-06	3.57635	0.000517187
ENSRNOG00000010872	Ckb	6:136142955-136145837	1.73966e-06	2.02014	0.000525608
ENSRNOG00000000957	Rpl21	12:9996950-9998779	2.67079e-06	2.15852	0.00075063
ENSRNOG00000024923	Nnat	3:154043872-154046330	2.65936e-06	3.9614	0.00075063
ENSRNOG00000007542	Scg5	3:105235049-105279462	3.68715e-06	3.31089	0.0010275
ENSRNOG00000018214	Bok	9:100829551-100840504	3.8304e-06	2.0796	0.00105845
ENSRNOG00000000827	Ier3	20:3438797-3440769	4.05824e-06	-2.62949	0.00110926
ENSRNOG00000001030	Tsc22d1	15:58554373-58658153	4.2491e-06	2.14666	0.00114527
ENSRNOG00000004091	Cwc25	10:85684897-85709568	5.54132e-06	4.36215	0.00146948
ENSRNOG00000027030	Adm	1:175445087-175447259	6.39447e-06	3.65476	0.00161746
ENSRNOG00000032297	Msmo1	16:26859396-26875973	8.40852e-06	-2.71638	0.00204813
ENSRNOG00000016220	Rpl12	3:12009577-12011666	8.60117e-06	2.1464	0.00207965
ENSRNOG00000004870	Dyrk3	13:47906230-47916877	8.91662e-06	3.23267	0.00213266
ENSRNOG00000039249	AABR07035539.1	12:19159467-19159901	9.14468e-06	-4.90316	0.00213266
ENSRNOG00000056457	Gpd1	7:141370490-141377928	9.13931e-06	-2.43094	0.00213266
ENSRNOG00000007607	Nr4a1	7:142905757-142920216	9.41807e-06	2.34421	0.00218095
ENSRNOG00000011292	NEWGENE_621351	4:31534224-31569151	9.9554e-06	2.63234	0.00227336
ENSRNOG00000018184	Tpm1	8:72814739-72842228	1.08282e-05	2.13011	0.00245561
ENSRNOG00000006787	Dhcr24	5:126164673-126191206	1.09848e-05	-2.39829	0.00247406
ENSRNOG00000053207	AABR07026125.1	16:64982381-64984767	1.1333e-05	4.09135	0.00253512
ENSRNOG00000019622	Ackr3	9:97355923-97367445	1.25087e-05	4.53895	0.00276055
ENSRNOG00000051563	Giot1	7:13104480-13108723	1.27069e-05	4.4064	0.00278561
ENSRNOG00000017209	Tubb3	19:56220754-56229813	1.3477e-05	2.56003	0.00293486
ENSRNOG00000008376	LOC100909595	4:155408232-155631856	1.57711e-05	3.4195	0.00338956
ENSRNOG00000031706	RGD1563601	17:27765007-27765754	1.65665e-05	-2.37826	0.00353738
ENSRNOG00000009311	Fstl3	7:12804918-12810570	1.67431e-05	2.79025	0.00355202
ENSRNOG00000031216	AABR07055776.1	7:9974624-9976367	1.71132e-05	3.48527	0.00358429
ENSRNOG00000011946	Ptn	4:64239157-64330996	1.7419e-05	2.31311	0.00362525
ENSRNOG00000058388	Zfp36	1:85380087-85382569	1.8293e-05	2.44522	0.00373621
ENSRNOG00000004554	Dcn	7:38742050-38782323	2.75642e-05	2.07573	0.00546019
ENSRNOG00000002911	Alb	14:19176276-19191863	3.21826e-05	-7.70327	0.00615267
ENSRNOG00000007793	Pnrc1	5:48501471-48504511	3.2625e-05	2.1106	0.00620119
ENSRNOG00000038045	AC128960.1	17:78876110-78876537	3.63482e-05	-2.12988	0.00679111
ENSRNOG00000005660	Fam110c	6:49968472-49974728	3.7563e-05	2.67565	0.00697844
ENSRNOG00000013011	Dnajb4	2:257394817-257425242	3.80508e-05	2.14223	0.00699008
ENSRNOG00000010146	Ndn	1:122981754-122983351	4.21566e-05	2.20095	0.00761667
ENSRNOG00000018413	Per3	5:168086997-168123395	4.30357e-05	-4.60008	0.007691
ENSRNOG00000055188	Tlx2	4:113900555-113902399	4.97994e-05	5.75589	0.00857357
ENSRNOG00000032729	Bex2	X:106556837-106558366	5.20142e-05	2.9426	0.00886209
ENSRNOG00000009715	Me1	8:94256838-94368834	5.5073e-05	-2.18893	0.00933488
ENSRNOG00000062158	AC134224.3	1:221158097-221158792	5.7353e-05	-4.25	0.00967148
ENSRNOG00000017333	Syt4	18:24172586-24182012	7.06612e-05	4.40601	0.0115027
ENSRNOG00000059883	LOC100912578	3:74226406-74229066	8.25717e-05	2.20823	0.0131169
ENSRNOG00000047790	LOC108348055	10:47785032-47792590	8.8892e-05	7.14627	0.014053
ENSRNOG00000057823	Ubc	12:36638456-36642734	0.00012971	2.28481	0.0195654
ENSRNOG00000033979	Gm5471	5:21043449-21043791	0.000150346	-5.27617	0.0214949
ENSRNOG00000058882	Emd	X:156452817-156456035	0.000149642	2.32561	0.0214949
ENSRNOG00000050792	Tnfaip6	3:37545237-37564699	0.000151739	3.3035	0.0215991
ENSRNOG00000018337	Caly	1:212537847-212549477	0.000161762	3.35482	0.0225391
ENSRNOG00000031273	AABR07034639.1	11:82366073-82366505	0.000193753	4.05219	0.0257943
ENSRNOG00000000529	Pim1	20:8165306-8169555	0.000201918	-3.23596	0.0265586
ENSRNOG00000018358	Nt5dc2	16:7212487-7220540	0.00023936	2.53737	0.0311102
ENSRNOG00000004327	Ddc	14:91905918-91996774	0.000245949	2.76678	0.0318407
ENSRNOG00000059827	LOC691995	10:57669529-57671080	0.000251215	3.19419	0.0323949
ENSRNOG00000015093	Sparcl1	14:6994189-7025308	0.00027825	2.60761	0.0347897
ENSRNOG00000034066	Hspa8	8:44990013-44993179	0.000295324	3.32593	0.0367846
ENSRNOG00000006037	Snap25	3:129599352-129788400	0.000327829	3.67951	0.0397786
ENSRNOG00000029698	Pim3	7:129860113-129863441	0.000365969	2.30005	0.0429791
ENSRNOG00000019244	Mxra8	5:173288446-173292929	0.000443981	2.47956	0.0496579

## Sheet: Adrenal_CT_vs_H60
Summary of DEIDEGs identified inadrenal glands at CT vs. H60.
Feature ID	Gene name	Position	P-value	Fold change	FDR
ENSRNOG00000033299	Mt-atp8	MT:7757-7961	0	-7.46021	0
ENSRNOG00000020298	Bag3	1:199941160-199965191	1.86591e-51	35.788	2.04522e-47
ENSRNOG00000027089	Ell2	2:2456734-2524237	8.15329e-44	7.67959	6.70262e-40
ENSRNOG00000032917	Zfand2a	12:17252092-17263477	1.52471e-41	42.2045	8.5e-38
ENSRNOG00000050647	Hspa1b	20:4877323-4879779	1.55095e-41	182.123	8.5e-38
ENSRNOG00000023546	Hspb1	12:23839398-23841049	2.40838e-40	20.3733	1.13136e-36
ENSRNOG00000013011	Dnajb4	2:257394817-257425242	4.85944e-39	6.85369	1.77548e-35
ENSRNOG00000000902	Hsph1	12:6322667-6341902	6.97629e-38	22.3469	2.29402e-34
ENSRNOG00000004091	Cwc25	10:85684897-85709568	1.76165e-37	12.1954	5.26622e-34
ENSRNOG00000014900	Crem	17:57031765-57090888	2.41077e-35	6.18901	6.6061e-32
ENSRNOG00000007029	Dnaja1	5:57028466-57039378	2.67625e-35	9.42924	6.76948e-32
ENSRNOG00000003687	Rgs2	13:60846307-60849094	1.30946e-34	15.0846	3.07565e-31
ENSRNOG00000046112	Dedd2	1:82072543-82088275	6.46066e-34	7.60625	1.41631e-30
ENSRNOG00000059714	Hsp90aa1	6:135107270-135112775	1.43587e-33	9.56183	2.95098e-30
ENSRNOG00000014456	Coq10b	9:61655962-61675873	2.96334e-32	2.96379	5.73197e-29
ENSRNOG00000001189	Sik1	20:10668410-10680283	1.36131e-31	11.7401	2.48689e-28
ENSRNOG00000028155	Dnaaf2	6:91481953-91490366	1.33485e-30	19.7724	2.22014e-27
ENSRNOG00000051563	Giot1	7:13104480-13108723	1.35033e-30	15.7494	2.22014e-27
ENSRNOG00000009920	LOC680121	11:13499163-13501263	2.69138e-30	5.43899	4.21431e-27
ENSRNOG00000056651	LOC103690068	1:88192369-88193346	4.47514e-30	13.6837	6.68892e-27
ENSRNOG00000031506	Ftl1	5:152325870-152326778	1.20994e-29	3.69341	1.72985e-26
ENSRNOG00000057823	Ubc	12:36638456-36642734	3.11106e-29	7.34067	4.26254e-26
ENSRNOG00000055564	RGD1564664	3:82854776-82856171	9.83912e-29	8.9285	1.24438e-25
ENSRNOG00000033024	AC099453.1	5:78392714-78393143	1.33915e-28	-8.11926	1.63093e-25
ENSRNOG00000028690	LOC100362366	3:24600602-24601063	6.81969e-28	-6.09108	8.00899e-25
ENSRNOG00000015160	Gem	5:25349927-25353661	2.37183e-26	9.56301	2.68941e-23
ENSRNOG00000004019	Phlda1	7:54247459-54249664	6.41113e-26	7.48475	7.02723e-23
ENSRNOG00000012106	Dnaja4	8:59278261-59294003	8.16023e-26	16.65	8.65589e-23
ENSRNOG00000037352	RGD1562747	8:69484173-69489891	1.19543e-25	10.4167	1.22842e-22
ENSRNOG00000052142	Ahsa2	14:108265206-108273938	6.88747e-24	6.81088	6.86305e-21
ENSRNOG00000022392	Hspb8	12:45905370-45920013	1.27898e-23	7.87554	1.23696e-20
ENSRNOG00000034066	Hspa8	8:44990013-44993179	2.74811e-23	13.4883	2.58189e-20
ENSRNOG00000003597	Tuba4a	9:82415604-82419288	3.65247e-23	5.18999	3.33623e-20
ENSRNOG00000048199	Rps19l2	9:16802318-16807966	6.30351e-23	17.7394	5.60212e-20
ENSRNOG00000011771	Ptp4a1	9:37223728-37231291	1.64265e-22	4.57423	1.42145e-19
ENSRNOG00000019018	Plat	16:74098259-74122889	3.96038e-22	8.66621	3.33921e-19
ENSRNOG00000005660	Fam110c	6:49968472-49974728	9.79381e-22	6.22833	8.05125e-19
ENSRNOG00000020843	LOC100360087	1:101448345-101449829	5.54865e-21	2.94715	4.45016e-18
ENSRNOG00000010873	Pithd1	5:154322550-154332940	6.17144e-21	4.22615	4.75692e-18
ENSRNOG00000019622	Ackr3	9:97355923-97367445	6.22047e-21	8.33842	4.75692e-18
ENSRNOG00000020938	Ppp1r15a	1:101511900-101514974	1.48065e-20	3.98049	1.08196e-17
ENSRNOG00000000461	LOC108348112	20:5262119-5269337	2.52553e-20	4.25275	1.80537e-17
ENSRNOG00000001030	Tsc22d1	15:58554373-58658153	5.35693e-20	3.03319	3.74792e-17
ENSRNOG00000042838	Junb	19:26092973-26094756	6.8142e-20	11.0439	4.66815e-17
ENSRNOG00000042271	Ubb	10:48881048-48881881	1.15694e-19	4.50339	7.76402e-17
ENSRNOG00000031216	AABR07055776.1	7:9974624-9976367	1.95897e-19	4.73722	1.28834e-16
ENSRNOG00000011668	Nfil3	17:12261101-12276315	3.29249e-19	8.42007	2.12288e-16
ENSRNOG00000004284	Btg1	7:37812830-37815088	4.25029e-19	4.48741	2.68774e-16
ENSRNOG00000062247	AABR07031521.1	18:17116551-17118501	1.08934e-18	6.46463	6.75861e-16
ENSRNOG00000014338	Slc25a25	3:11442396-11452529	1.77954e-18	6.85052	1.08364e-15
ENSRNOG00000046667	Fosb	1:80214493-80221710	3.08557e-18	26.1391	1.84478e-15
ENSRNOG00000019834	Hsp90ab1	9:17817720-17823243	5.95076e-18	3.23644	3.49426e-15
ENSRNOG00000033473	Rpl36	9:10441258-10441834	8.61264e-18	2.9115	4.96859e-15
ENSRNOG00000058461	Sfpq	5:145079802-145088498	2.19933e-17	2.88988	1.24691e-14
ENSRNOG00000011039	Gch1	15:23934584-23969011	8.97708e-17	4.0599	5.00328e-14
ENSRNOG00000033803	LOC100360841	9:69790830-69791196	9.42079e-17	-5.61858	5.16307e-14
ENSRNOG00000050655	P4ha1	20:28920615-28971966	1.0111e-16	6.19194	5.4505e-14
ENSRNOG00000008487	Amotl2	8:111209907-111226226	1.0892e-16	5.10437	5.77681e-14
ENSRNOG00000012886	Maff	7:120580742-120592095	1.4184e-16	6.42689	7.40339e-14
ENSRNOG00000026643	Chordc1	8:17421556-17446165	1.47602e-16	5.14633	7.58375e-14
ENSRNOG00000023509	Irs2	16:83824429-83848684	1.5402e-16	4.22484	7.79175e-14
ENSRNOG00000005964	Nr4a3	5:63781800-63821637	2.06801e-16	4.62978	1.03034e-13
ENSRNOG00000031889	AABR07065438.1	6:128738387-128739319	2.70569e-16	-3.54804	1.32793e-13
ENSRNOG00000016831	Serpinh1	1:164301009-164308317	3.6404e-16	2.18637	1.7604e-13
ENSRNOG00000026605	Ifi27l2b	6:127336304-127337791	8.88178e-16	-3.12475	4.23275e-13
ENSRNOG00000020480	Fads1	1:226234073-226249138	2.07611e-15	-3.34126	9.75267e-13
ENSRNOG00000019466	Agpat2	3:4044541-4055806	2.35367e-15	-3.35351	1.09008e-12
ENSRNOG00000058882	Emd	X:156452817-156456035	2.69209e-15	3.77108	1.2295e-12
ENSRNOG00000001198	Fam222a	12:47748164-47793534	2.82046e-15	4.19166	1.27048e-12
ENSRNOG00000017801	Atf4	7:121480722-121482772	3.37999e-15	3.15803	1.50195e-12
ENSRNOG00000058646	Zfp36l1	6:103308044-103313074	8.32276e-15	3.24003	3.64903e-12
ENSRNOG00000005615	Gadd45a	4:97782511-97784842	1.51801e-14	9.96438	6.56799e-12
ENSRNOG00000021475	Ldah	6:33407247-33491725	1.94865e-14	6.64307	8.32173e-12
ENSRNOG00000010706	Ccdc117	14:85763396-85772762	2.12322e-14	4.37284	8.95102e-12
ENSRNOG00000009358	Osgin2	5:29663684-29682005	2.50285e-14	4.26614	1.02877e-11
ENSRNOG00000016299	Klf4	5:72283312-72287669	2.48063e-14	6.44456	1.02877e-11
ENSRNOG00000004084	Lratd1	6:39358984-39363458	4.08193e-14	24.7081	1.65711e-11
ENSRNOG00000025587	Plagl1	1:7252348-7259035	4.50254e-14	7.76493	1.80557e-11
ENSRNOG00000062158	AC134224.3	1:221158097-221158792	5.33325e-14	-11.4311	2.11293e-11
ENSRNOG00000015434	Midn	7:12414732-12424367	6.40216e-14	2.85288	2.50622e-11
ENSRNOG00000034093	AABR07011951.1	2:177651240-177653288	7.0056e-14	3.68491	2.71018e-11
ENSRNOG00000009768	LOC100912228	4:79557853-79565097	9.48466e-14	21.0062	3.62656e-11
ENSRNOG00000050792	Tnfaip6	3:37545237-37564699	9.7145e-14	5.71456	3.67174e-11
ENSRNOG00000046484	Ccdc160	X:140175860-140176829	2.07185e-13	-5.41006	7.74189e-11
ENSRNOG00000000661	Hps4	12:50285277-50314406	2.44273e-13	4.7877	9.02519e-11
ENSRNOG00000011238	Tiparp	2:157316265-157341469	1.06502e-12	8.34	3.89123e-10
ENSRNOG00000021729	Iqub	4:51482169-51586881	1.5015e-12	47.9678	5.42569e-10
ENSRNOG00000009754	Nampt	6:52122084-52156472	1.53667e-12	3.2246	5.46737e-10
ENSRNOG00000016930	Ube2s	1:72580423-72584482	1.54629e-12	2.08174	5.46737e-10
ENSRNOG00000000918	Zbed5	12:30308468-30314519	2.23338e-12	2.59483	7.81281e-10
ENSRNOG00000000909	Uspl1	12:6929977-6956984	2.72854e-12	3.84639	9.44447e-10
ENSRNOG00000012872	Carnmt1	1:234677691-234704792	2.94367e-12	4.00021	1.0083e-09
ENSRNOG00000007393	Ndrg1	7:107734322-107775714	3.32254e-12	5.11651	1.12634e-09
ENSRNOG00000012559	Man1b1	3:2547985-2569049	3.36688e-12	2.74396	1.12972e-09
ENSRNOG00000014117	Hmox1	19:14508615-14515456	4.74133e-12	5.29214	1.57484e-09
ENSRNOG00000006756	Maged1	X:63803188-63809861	4.94402e-12	2.35433	1.62574e-09
ENSRNOG00000020644	Nsg2	10:15867886-15928169	5.12187e-12	3.88948	1.66755e-09
ENSRNOG00000002393	Eprs	13:103300931-103371577	5.58734e-12	3.57235	1.78377e-09
ENSRNOG00000013328	Rbpms	16:61954589-62096497	5.53816e-12	2.37124	1.78377e-09
ENSRNOG00000005413	Creb3l1	3:80892434-80933283	6.75894e-12	14.7994	2.13706e-09
ENSRNOG00000003745	Atf3	13:109817727-109849632	7.27428e-12	15.2846	2.2781e-09
ENSRNOG00000004726	Mapkapk2	13:47785160-47831110	8.2668e-12	3.37925	2.54054e-09
ENSRNOG00000014743	Hagh	10:14216154-14230515	1.46876e-11	3.33595	4.47196e-09
ENSRNOG00000019584	Dlk1	6:133552820-133583751	1.55034e-11	2.20511	4.67705e-09
ENSRNOG00000007607	Nr4a1	7:142905757-142920216	1.83808e-11	3.07965	5.4947e-09
ENSRNOG00000057078	Ddit4	20:29509288-29511382	3.05584e-11	6.68834	9.05272e-09
ENSRNOG00000008015	Fos	6:109300432-109303299	3.37075e-11	16.8037	9.80889e-09
ENSRNOG00000019996	Slc16a1	2:207108551-207128554	3.35594e-11	5.51966	9.80889e-09
ENSRNOG00000005513	Srsf5	6:104611025-104615302	3.98468e-11	-2.313	1.13938e-08
ENSRNOG00000017209	Tubb3	19:56220754-56229813	4.45018e-11	4.72111	1.26151e-08
ENSRNOG00000037673	AABR07071891.1	1:84573495-84573959	5.94267e-11	-3.0408	1.6702e-08
ENSRNOG00000014525	Hspd1	9:61680529-61690956	6.16053e-11	2.02051	1.71675e-08
ENSRNOG00000019822	Gadd45b	7:11646268-11648322	6.28201e-11	4.79787	1.73589e-08
ENSRNOG00000009205	Lmo4	2:250218640-250241673	6.62529e-11	2.53664	1.80049e-08
ENSRNOG00000059017	AC106292.2	11:65743891-65745038	6.59247e-11	6.42836	1.80049e-08
ENSRNOG00000059589	Lmbr1	4:2116093-2201749	6.73376e-11	6.59536	1.81497e-08
ENSRNOG00000000796	Ranbp2	20:28027053-28076664	6.86583e-11	2.96459	1.83552e-08
ENSRNOG00000051286	LOC100911516	9:101106891-101107575	7.28349e-11	10.5238	1.93148e-08
ENSRNOG00000014350	Ccn1	2:251529353-251532312	8.16568e-11	7.75764	2.1481e-08
ENSRNOG00000017212	Spsb1	5:166913734-166926636	1.26676e-10	3.79672	3.30595e-08
ENSRNOG00000009734	Akr1b8	4:61771969-61828657	1.30471e-10	3.1212	3.37818e-08
ENSRNOG00000021164	Stip1	1:222274132-222293148	1.5006e-10	3.00483	3.85501e-08
ENSRNOG00000014448	Arntl	1:178039062-178137465	2.12953e-10	9.72991	5.38656e-08
ENSRNOG00000028711	Dgat1	7:117566367-117576737	2.23774e-10	5.46961	5.61706e-08
ENSRNOG00000004870	Dyrk3	13:47906230-47916877	2.40213e-10	4.69818	5.98404e-08
ENSRNOG00000025889	Gnas	3:172374956-172428483	2.44128e-10	4.02241	6.03583e-08
ENSRNOG00000059857	Rnd1	7:140349137-140356209	2.54853e-10	9.59942	6.25397e-08
ENSRNOG00000014727	Fahd1	10:14214518-14215957	2.75059e-10	2.75916	6.69982e-08
ENSRNOG00000005600	Nr4a2	3:43111239-43119159	3.24648e-10	5.85416	7.84955e-08
ENSRNOG00000000321	Cd24	20:48335539-48340846	3.39233e-10	5.31762	8.14233e-08
ENSRNOG00000046207	Cbx4	10:108190994-108196217	3.66158e-10	2.77385	8.72492e-08
ENSRNOG00000023786	Ybx1	5:138319761-138336475	3.72918e-10	2.0937	8.82205e-08
ENSRNOG00000013090	Gadd45g	17:13391466-13393243	3.9588e-10	7.05244	9.29373e-08
ENSRNOG00000021812	Scx	7:117519074-117521093	3.98508e-10	9.85926	9.29373e-08
ENSRNOG00000019422	Egr1	18:27657627-27661429	4.08597e-10	16.5385	9.46191e-08
ENSRNOG00000021269	Chgb	3:125428259-125441594	4.38494e-10	4.39301	1.00832e-07
ENSRNOG00000033152	Rps18l1	10:104521699-104522241	4.54802e-10	3.1433	1.03856e-07
ENSRNOG00000001728	Fam43a	11:73676600-73678984	5.71686e-10	2.29784	1.28759e-07
ENSRNOG00000003476	Slc6a4	10:63153650-63176463	5.90825e-10	4.97986	1.31356e-07
ENSRNOG00000011222	Dynll1	12:47074199-47076572	5.91207e-10	2.76381	1.31356e-07
ENSRNOG00000052549	Chga	6:126434225-126445568	7.6814e-10	3.20224	1.68392e-07
ENSRNOG00000011511	Stk24	15:106629311-106678918	9.27663e-10	3.36187	2.00686e-07
ENSRNOG00000015222	Tent5c	2:202798197-202816562	9.93029e-10	4.95734	2.13423e-07
ENSRNOG00000015496	Tpm4	16:19385735-19399903	1.08114e-09	2.2391	2.30852e-07
ENSRNOG00000056457	Gpd1	7:141370490-141377928	1.14516e-09	-3.24719	2.42943e-07
ENSRNOG00000020410	Th	1:216073030-216080287	1.16964e-09	3.31857	2.46546e-07
ENSRNOG00000016573	Dgat2	1:164113458-164143818	1.21487e-09	-5.52	2.5284e-07
ENSRNOG00000010524	Cryab	8:55178288-55182545	1.28237e-09	3.71263	2.65209e-07
ENSRNOG00000009887	Arih1	8:64166359-64268555	1.31927e-09	2.56259	2.69451e-07
ENSRNOG00000024428	Kif20a	18:27424327-27432814	1.39218e-09	6.46222	2.82586e-07
ENSRNOG00000014204	Pacsin3	3:80072488-80081047	2.35134e-09	-2.74158	4.68602e-07
ENSRNOG00000004132	Lasp1	10:85744567-85785133	2.375e-09	2.877	4.70464e-07
ENSRNOG00000058186	Errfi1	5:167952727-167966009	2.42896e-09	3.0829	4.78272e-07
ENSRNOG00000005359	Csrnp3	3:51883558-52120290	2.47954e-09	18.4673	4.85325e-07
ENSRNOG00000006444	Fkbp4	4:161748992-161757447	2.64717e-09	2.20105	5.1507e-07
ENSRNOG00000014205	Klf2	16:19223086-19225037	3.57966e-09	3.04513	6.88362e-07
ENSRNOG00000050343	Jmy	2:23042188-23097610	3.55979e-09	7.09291	6.88362e-07
ENSRNOG00000020723	Pten	1:251421595-251487832	3.77151e-09	2.44317	7.21039e-07
ENSRNOG00000007573	Hoxb9	10:84119883-84123390	3.90826e-09	3.22216	7.42863e-07
ENSRNOG00000009766	Gpr180	15:103344475-103369630	4.09873e-09	4.79852	7.7459e-07
ENSRNOG00000032232	Snrpg	1:91588227-91588609	4.3532e-09	-9.67813	8.17978e-07
ENSRNOG00000020325	Calhm2	1:266908368-266914093	4.39613e-09	5.9766	8.21352e-07
ENSRNOG00000003228	Mid1ip1	X:13114568-13116743	6.27817e-09	-2.51108	1.16636e-06
ENSRNOG00000016989	Dolk	3:8850153-8852192	7.0703e-09	-2.96883	1.30614e-06
ENSRNOG00000049593	Wbp11l1	4:170772162-170810080	7.566e-09	-44.3561	1.3899e-06
ENSRNOG00000001172	Rnf10	12:47103313-47138128	7.82392e-09	2.26243	1.4293e-06
ENSRNOG00000007390	Nfkbia	6:76267227-76270457	8.34935e-09	2.44092	1.50853e-06
ENSRNOG00000020679	Icam1	8:22035255-22047059	9.60834e-09	6.13015	1.72651e-06
ENSRNOG00000005698	Ndufa5	4:51590412-51598771	9.84085e-09	3.33161	1.74917e-06
ENSRNOG00000001414	Serpine1	12:22641103-22651482	1.20639e-08	5.07787	2.13278e-06
ENSRNOG00000004255	Usf1	13:89797799-89805558	1.25692e-08	-2.45886	2.21023e-06
ENSRNOG00000002470	Ifi47	10:34277992-34285623	1.30311e-08	-2.55504	2.2672e-06
ENSRNOG00000027405	Ccp110	1:188420460-188444991	1.38978e-08	12.5669	2.40527e-06
ENSRNOG00000010240	Tent5a	8:92937738-92942076	1.40795e-08	7.12813	2.42396e-06
ENSRNOG00000013654	Cbln2	18:83777664-83782930	1.51229e-08	6.0081	2.59003e-06
ENSRNOG00000039249	AABR07035539.1	12:19159467-19159901	1.8855e-08	-8.20874	3.19593e-06
ENSRNOG00000045967	AABR07064061.1	6:62796950-62798384	1.96016e-08	7.86249	3.30544e-06
ENSRNOG00000011927	Sdc3	5:148923097-148956404	2.13772e-08	-2.61205	3.57784e-06
ENSRNOG00000013520	Mat2a	4:100296074-100303080	2.45946e-08	2.06563	4.08456e-06
ENSRNOG00000005248	Slc1a4	14:104581189-104612597	2.52587e-08	7.57175	4.17378e-06
ENSRNOG00000015514	Bcat1	4:179259307-179339795	2.71971e-08	3.82023	4.44937e-06
ENSRNOG00000000275	Fam13c	20:19360229-19479325	2.86546e-08	4.20124	4.63852e-06
ENSRNOG00000010574	Ptpn1	3:164665531-164711848	2.87665e-08	2.66702	4.63852e-06
ENSRNOG00000018214	Bok	9:100829551-100840504	3.21587e-08	2.08364	5.13337e-06
ENSRNOG00000019536	Smim3	18:55744809-55771730	3.20312e-08	2.11241	5.13337e-06
ENSRNOG00000024923	Nnat	3:154043872-154046330	3.24116e-08	2.5799	5.14874e-06
ENSRNOG00000015036	Ccn2	1:21851659-21854773	3.4701e-08	2.89108	5.47265e-06
ENSRNOG00000047005	Kcnk5	15:4554602-4597000	3.47834e-08	3.12488	5.47265e-06
ENSRNOG00000050869	Cebpd	11:89008007-89009146	3.62126e-08	3.80818	5.67038e-06
ENSRNOG00000025235	Tmem130	12:11814070-11840100	3.68154e-08	4.58242	5.73744e-06
ENSRNOG00000008116	Plpp3	5:124690213-124765498	3.75548e-08	2.08999	5.79772e-06
ENSRNOG00000008709	Arhgap32	8:33239138-33392305	3.77769e-08	5.77129	5.80476e-06
ENSRNOG00000001049	Tpt1	15:57891679-57894504	4.15854e-08	2.34715	6.31991e-06
ENSRNOG00000013165	Bet1l	1:213602849-213605643	4.17061e-08	-3.33253	6.31991e-06
ENSRNOG00000000957	Rpl21	12:9996950-9998779	4.23219e-08	2.09746	6.38381e-06
ENSRNOG00000002232	Aff1	14:7226585-7384876	4.26139e-08	5.09806	6.39851e-06
ENSRNOG00000022054	Paqr7	5:152708774-152720229	4.29851e-08	-3.29255	6.4249e-06
ENSRNOG00000016460	Clu	15:42640145-42665857	4.31994e-08	2.26599	6.42773e-06
ENSRNOG00000030447	AC105662.1	5:173148883-173149276	4.58327e-08	11.7937	6.78343e-06
ENSRNOG00000018107	Zfand5	1:238843337-238852566	4.83842e-08	2.04146	7.10276e-06
ENSRNOG00000026880	Usp38	19:30668601-30699859	5.49931e-08	3.74476	8.03707e-06
ENSRNOG00000010819	Hspa4l	2:127625682-127677503	5.88922e-08	4.69992	8.56881e-06
ENSRNOG00000025443	Map1lc3a	3:150801288-150802935	6.50333e-08	2.68778	9.42066e-06
ENSRNOG00000019587	Ptprn	9:82446632-82461903	6.83267e-08	3.84331	9.85433e-06
ENSRNOG00000018393	Uts2	5:168078747-168084145	7.05898e-08	17.9233	1.00485e-05
ENSRNOG00000021719	Slfn5	10:70298518-70312070	7.02976e-08	-2.66866	1.00485e-05
ENSRNOG00000016281	Col4a1	16:83522161-83632153	7.6999e-08	2.73157	1.09136e-05
ENSRNOG00000047706	LOC103690108	20:3791406-3794027	9.00276e-08	3.55842	1.27055e-05
ENSRNOG00000058920	Coa8	6:136279495-136304095	9.35303e-08	4.46877	1.31434e-05
ENSRNOG00000020546	Lipe	1:82248045-82266727	9.9972e-08	-2.4429	1.39888e-05
ENSRNOG00000016374	Fgfr2	1:200590952-200696928	1.01547e-07	2.05965	1.4149e-05
ENSRNOG00000047396	Rmnd5b	10:34979922-34990943	1.03513e-07	-7.26914	1.43621e-05
ENSRNOG00000019202	Pvr	1:80820049-80835701	1.07425e-07	4.65317	1.48422e-05
ENSRNOG00000027151	Lrrc58	11:65747035-65759581	1.19261e-07	9.5681	1.63403e-05
ENSRNOG00000009639	Zrsr1	14:107750161-107751892	1.30597e-07	2.829	1.78192e-05
ENSRNOG00000010737	Mbnl2	15:105640096-105797932	1.35694e-07	2.39105	1.83128e-05
ENSRNOG00000019141	Ch25h	1:252807064-252808380	1.35886e-07	4.93774	1.83128e-05
ENSRNOG00000060728	Tuba1a	7:140637286-140640953	1.39121e-07	2.52841	1.86724e-05
ENSRNOG00000018487	Slc3a2	1:224906553-224921092	1.44095e-07	2.05837	1.92613e-05
ENSRNOG00000006539	Pex16	3:81283136-81292573	1.47693e-07	-2.34956	1.96623e-05
ENSRNOG00000056596	Alas1	8:114927721-114940177	1.58229e-07	2.13176	2.09065e-05
ENSRNOG00000003977	Dusp1	10:16970625-16973418	1.63485e-07	8.61428	2.14179e-05
ENSRNOG00000005292	Trip11	6:125742795-125812517	1.74879e-07	3.85582	2.28197e-05
ENSRNOG00000007433	Cyb561	10:94136992-94147621	1.80683e-07	3.11186	2.3461e-05
ENSRNOG00000009625	Dpysl2	15:43477628-43542939	1.81221e-07	2.74888	2.3461e-05
ENSRNOG00000015055	Scg2	9:85237457-85243001	1.9448e-07	3.64591	2.50787e-05
ENSRNOG00000025608	Lrat	2:181896304-181905300	2.31822e-07	3.01561	2.97774e-05
ENSRNOG00000001052	Slc25a30	15:57813355-57834173	2.37829e-07	4.01928	3.04301e-05
ENSRNOG00000014429	Arfgap2	3:80081646-80093658	2.62667e-07	-2.04501	3.33485e-05
ENSRNOG00000058039	Acta2	1:252537614-252550394	3.04755e-07	3.65144	3.82491e-05
ENSRNOG00000005700	Nsg1	14:77380261-77401996	3.58804e-07	3.08988	4.48614e-05
ENSRNOG00000001843	Bcl6	11:80255789-80279075	3.72467e-07	6.36343	4.62182e-05
ENSRNOG00000021027	Dbp	1:101687854-101692846	4.17746e-07	-4.9296	5.16419e-05
ENSRNOG00000001416	Vgf	12:22677606-22680630	4.22369e-07	14.7041	5.18238e-05
ENSRNOG00000010716	Atoh8	4:100067340-100099517	4.22337e-07	4.08482	5.18238e-05
ENSRNOG00000019661	Gdf15	16:20555394-20557978	4.31546e-07	5.48481	5.27529e-05
ENSRNOG00000017333	Syt4	18:24172586-24182012	4.5248e-07	5.84909	5.51071e-05
ENSRNOG00000046382	Gatd1	1:214389254-214394411	4.81339e-07	-36.3614	5.81907e-05
ENSRNOG00000050786	AC103024.2	10:34316836-34317161	4.81339e-07	-35.4606	5.81907e-05
ENSRNOG00000043451	Spp1	14:6673685-6679901	5.001e-07	7.52308	6.00175e-05
ENSRNOG00000006604	Thy1	8:48382120-48386935	5.17691e-07	2.61389	6.16783e-05
ENSRNOG00000023257	Adamts9	4:124660261-124858250	5.40964e-07	3.87564	6.42185e-05
ENSRNOG00000018294	Hspa5	3:13838303-13842762	5.90004e-07	2.04518	6.97881e-05
ENSRNOG00000002343	Uchl1	14:43133217-43143973	5.94889e-07	2.56637	7.01138e-05
ENSRNOG00000002218	Stbd1	14:16976355-16979760	6.12181e-07	2.64178	7.18941e-05
ENSRNOG00000020551	Bles03	1:220806472-220808804	6.53926e-07	-2.71534	7.6252e-05
ENSRNOG00000045636	Fasn	10:109987734-110005901	6.68129e-07	-4.39565	7.76328e-05
ENSRNOG00000006420	Rbm38	3:171037956-171050475	7.47979e-07	4.32029	8.66049e-05
ENSRNOG00000000906	Medag	12:6711746-6740714	7.66445e-07	-3.27539	8.78154e-05
ENSRNOG00000001607	Adamts1	11:25342125-25350974	7.64208e-07	3.95715	8.78154e-05
ENSRNOG00000019704	Resp18	9:82470758-82477181	7.64963e-07	2.3813	8.78154e-05
ENSRNOG00000024578	Ttyh2	10:103206013-103248862	8.16874e-07	-2.76647	9.32683e-05
ENSRNOG00000011310	Pde10a	1:52360295-52544450	8.90557e-07	6.32606	0.00010098
ENSRNOG00000021198	Hist1h2bq	17:43679924-43689311	9.10345e-07	2.02174	0.000102869
ENSRNOG00000018109	Clic4	5:153568744-153625869	9.72899e-07	4.34107	0.000109187
ENSRNOG00000022268	Pnpla3	7:125034763-125055976	1.03057e-06	-13.3137	0.000115266
ENSRNOG00000002946	Socs3	10:106975177-106976040	1.05744e-06	5.42576	0.000117871
ENSRNOG00000040287	Cyp1b1	6:2307807-2316722	1.0776e-06	2.29283	0.000119712
ENSRNOG00000056028	Rfxap	2:144003453-144007636	1.12019e-06	-4.34096	0.000124
ENSRNOG00000010170	Tubb4b	3:2441732-2444281	1.1289e-06	2.22504	0.000124153
ENSRNOG00000008572	Ppcs	5:138466292-138470096	1.19072e-06	-5.19601	0.000128798
ENSRNOG00000014648	Efnb2	16:86631063-86675049	1.18463e-06	2.86443	0.000128798
ENSRNOG00000025484	Tmem177	13:35929818-35933243	1.19072e-06	-5.13669	0.000128798
ENSRNOG00000019383	Tef	7:123043502-123058604	1.21449e-06	-2.88964	0.000130938
ENSRNOG00000013250	Pdcd5	1:91173472-91178801	1.25458e-06	-3.48076	0.000133943
ENSRNOG00000010630	Prcp	1:157701088-157750169	1.27819e-06	4.42797	0.000136022
ENSRNOG00000020771	Sap18	10:89635674-89636193	1.35738e-06	2.02263	0.000143983
ENSRNOG00000017748	Nkx6-2	1:211922388-211923929	1.45894e-06	6.53349	0.000152785
ENSRNOG00000013948	Zc3hav1	4:66011914-66062089	1.68161e-06	2.03429	0.000175544
ENSRNOG00000000521	Cdkn1a	20:6351457-6358864	1.8693e-06	4.72729	0.00019452
ENSRNOG00000001086	Vps37b	12:37984789-38023368	1.93006e-06	2.64239	0.000199579
ENSRNOG00000057696	Sbk1	1:197659186-197681006	2.31048e-06	-3.49847	0.000237424
ENSRNOG00000002461	Nid1	17:90553393-90627101	2.34592e-06	3.06603	0.000240315
ENSRNOG00000006931	Eepd1	8:26652120-26758325	2.46436e-06	-2.48516	0.000251663
ENSRNOG00000050006	Agtr2	X:119390012-119393842	2.55413e-06	2.50823	0.000259221
ENSRNOG00000000158	Cdo1	18:40701983-40716686	2.58342e-06	-3.12971	0.000261277
ENSRNOG00000028652	Map10	19:58505810-58508603	2.59029e-06	7.98089	0.000261277
ENSRNOG00000058393	Taf15	10:70689862-70721892	2.60754e-06	-2.35845	0.000262214
ENSRNOG00000011992	Slc18a1	16:22361997-22395183	2.66457e-06	3.19471	0.000266319
ENSRNOG00000018809	Psmd5	3:13916202-13933658	2.78541e-06	-2.39471	0.000277554
ENSRNOG00000015408	Vil1	9:81689801-81717621	3.00847e-06	12.1492	0.000297974
ENSRNOG00000016596	Hspa4	10:38601623-38642397	3.32756e-06	2.06306	0.000324688
ENSRNOG00000028368	Etnk2	13:50481162-50499140	3.48601e-06	-2.25464	0.000339143
ENSRNOG00000029115	LOC102555453	7:59762501-59763219	3.73205e-06	3.06406	0.000360944
ENSRNOG00000047250	Gmfb	15:23601367-23606634	3.89469e-06	2.36359	0.000375569
ENSRNOG00000008510	Abtb2	3:93495105-93647721	4.32262e-06	5.32451	0.000415209
ENSRNOG00000008712	Tmem268	5:79382095-79407433	4.54096e-06	-2.89263	0.000434071
ENSRNOG00000015999	Cirbp	7:12401206-12405022	4.79406e-06	-2.38135	0.000455616
ENSRNOG00000029512	LOC100361854	X:115495697-115496045	5.29034e-06	-2.31906	0.000501332
ENSRNOG00000050997	Ifrd1	6:60132023-60151420	5.36808e-06	2.31882	0.000507237
ENSRNOG00000001851	Far2	4:182483193-182565436	6.11063e-06	3.28681	0.000569
ENSRNOG00000051592	AABR07044925.1	20:26833356-26852199	6.12554e-06	3.14705	0.000569
ENSRNOG00000038045	AC128960.1	17:78876110-78876537	6.65356e-06	-2.17255	0.000614575
ENSRNOG00000027145	Rora	8:75516903-75607212	6.95694e-06	3.5571	0.000637329
ENSRNOG00000061056	AABR07042514.3	X:158581630-158582269	6.95804e-06	3.07886	0.000637329
ENSRNOG00000002254	Tmem33	14:42535700-42560174	7.16258e-06	2.71357	0.000654242
ENSRNOG00000014475	Slc31a1	5:78222503-78249358	7.36512e-06	2.17197	0.000669025
ENSRNOG00000007544	Il23r	4:98203957-98305173	7.53559e-06	5.86115	0.000678884
ENSRNOG00000016099	Id4	17:16692556-16695126	7.50453e-06	3.38035	0.000678884
ENSRNOG00000052421	AABR07012475.2	2:196587205-196591324	7.53559e-06	-5.83943	0.000678884
ENSRNOG00000031851	Ndufa4l2	7:70821956-70824085	7.9037e-06	2.74966	0.000707239
ENSRNOG00000049203	Pex5	4:156983914-157009674	7.91485e-06	2.28215	0.000707239
ENSRNOG00000022273	Rfk	1:236494220-236501733	8.11946e-06	2.00672	0.000723556
ENSRNOG00000005802	Usp24	5:125896724-126030401	8.7656e-06	2.37894	0.000779025
ENSRNOG00000058470	Col12a1	8:87040798-87158368	8.87978e-06	3.21362	0.000787045
ENSRNOG00000017260	Cdr2	1:190889700-190914610	9.1144e-06	4.59243	0.000805668
ENSRNOG00000008837	Ass1	3:10327413-10375826	9.42805e-06	4.24432	0.000828937
ENSRNOG00000012477	Eef1a2	3:176657106-176666282	9.5141e-06	3.26061	0.000834272
ENSRNOG00000010408	Polr2k	7:74989222-74992582	1.00099e-05	-2.13421	0.000870778
ENSRNOG00000006331	Elovl5	8:85259981-85285983	1.02163e-05	2.55706	0.000884062
ENSRNOG00000013408	Npas2	9:45901740-46081880	1.10643e-05	6.22847	0.000949937
ENSRNOG00000005275	Shmt1	10:47031049-47059216	1.2435e-05	-2.22239	0.0010571
ENSRNOG00000020703	Sipa1l3	1:87260834-87468288	1.27151e-05	3.02468	0.00107761
ENSRNOG00000004234	Mgat2	6:91476697-91479183	1.28619e-05	2.14269	0.00108724
ENSRNOG00000007542	Scg5	3:105235049-105279462	1.30872e-05	2.69609	0.00110345
ENSRNOG00000054344	Ier2	19:25774142-25775659	1.47511e-05	2.31023	0.0012374
ENSRNOG00000007808	Nap1l5	4:89149316-89151184	1.50241e-05	3.73724	0.00125709
ENSRNOG00000008782	Pnisr	5:35991067-36017944	1.56181e-05	-2.15719	0.00130017
ENSRNOG00000004693	Pbx1	13:86390740-86451002	1.64465e-05	2.28593	0.00136569
ENSRNOG00000033169	Cpeb4	10:15987920-16046033	1.70741e-05	2.83582	0.00140362
ENSRNOG00000000064	Atp5me	14:2325307-2326436	1.78071e-05	-2.05398	0.00145857
ENSRNOG00000008001	Rab3b	5:128501846-128568188	1.78312e-05	2.78543	0.00145857
ENSRNOG00000059268	Ppp1r10	20:3329676-3344286	2.04207e-05	2.43791	0.00165392
ENSRNOG00000003895	Rgs1	13:61066152-61070599	2.11558e-05	7.88905	0.0017009
ENSRNOG00000002911	Alb	14:19176276-19191863	2.23419e-05	-9.70002	0.00178752
ENSRNOG00000008376	LOC100909595	4:155408232-155631856	2.2913e-05	3.40036	0.00182433
ENSRNOG00000015415	Rhoq	6:10533150-10568581	2.50281e-05	2.4181	0.00198313
ENSRNOG00000009946	Ldlr	8:22750335-22774903	2.62239e-05	2.20257	0.00206759
ENSRNOG00000016298	Lysmd3	2:9526208-9534362	2.62826e-05	2.89282	0.00206759
ENSRNOG00000031090	RT1-CE7	20:4694471-4896970	2.757e-05	2.36048	0.00215854
ENSRNOG00000004660	Fzd6	7:77899321-77931029	2.77657e-05	-2.99816	0.00216583
ENSRNOG00000008224	Jdp2	6:109466059-109505161	2.77949e-05	3.28168	0.00216583
ENSRNOG00000003538	Adamts4	13:89622631-89634419	3.06669e-05	19.334	0.00235612
ENSRNOG00000005059	LOC100911917	3:4861752-4866833	3.06669e-05	-25.3982	0.00235612
ENSRNOG00000019050	Ifit1	1:252944102-252946170	3.15619e-05	-4.76118	0.0024048
ENSRNOG00000042592	Rgs10	1:199782077-199823386	3.1593e-05	2.15658	0.0024048
ENSRNOG00000033433	Csrnp1	8:128659867-128672284	3.35065e-05	2.61586	0.00254456
ENSRNOG00000049215	Cbx2	10:108132104-108140935	3.4309e-05	5.84267	0.0025995
ENSRNOG00000008758	Tspan18	3:82097067-82236664	3.43972e-05	2.967	0.00260019
ENSRNOG00000059492	LOC100365363	1:60884760-60894948	3.65417e-05	-3.53326	0.00274966
ENSRNOG00000011815	Sgk1	1:24185434-24302298	3.83428e-05	2.84217	0.00286551
ENSRNOG00000011292	NEWGENE_621351	4:31534224-31569151	3.85327e-05	2.99845	0.00287318
ENSRNOG00000048195	Nudt13	15:4434312-4454958	3.91124e-05	-3.66606	0.00290323
ENSRNOG00000046536	AABR07016141.1	14:94590764-94602088	3.94133e-05	-2.60439	0.00291898
ENSRNOG00000021984	Rgs7	13:93095199-93307199	3.95788e-05	5.01578	0.00292465
ENSRNOG00000018567	Slc20a1	3:121725858-121739173	4.66215e-05	2.25073	0.00337677
ENSRNOG00000022582	Ccnq	10:66019519-66020682	4.72977e-05	-2.84823	0.00341822
ENSRNOG00000020379	Cog8	19:39246624-39257451	5.04248e-05	-2.63273	0.00361246
ENSRNOG00000027087	Tmem186	10:7077487-7080798	5.24894e-05	-2.71068	0.00372788
ENSRNOG00000012565	Cln8	16:79828323-79838212	5.28791e-05	2.95363	0.00374747
ENSRNOG00000001251	Grifin	12:16170161-16172129	5.30372e-05	-6.23533	0.00375058
ENSRNOG00000014142	Ogfrl1	9:29634178-29647903	5.3706e-05	2.72491	0.00378161
ENSRNOG00000015125	LOC100911548	4:157326726-157328379	5.53327e-05	-2.36195	0.00387129
ENSRNOG00000017382	Snx33	8:61584655-61595032	5.53026e-05	-2.56622	0.00387129
ENSRNOG00000002793	Sstr2	10:102136282-102143434	5.63448e-05	2.43137	0.00393373
ENSRNOG00000018778	Cadm1	8:52127398-52189722	6.26729e-05	3.46401	0.00432049
ENSRNOG00000009565	Pdk4	4:30546663-30556814	6.59749e-05	2.8783	0.00452913
ENSRNOG00000002582	Hand1	10:43250744-43253296	6.65073e-05	8.03855	0.00455617
ENSRNOG00000029394	Dusp8	1:215030428-215033460	7.11337e-05	3.85285	0.00486297
ENSRNOG00000010775	Arrdc4	1:129766099-129780356	7.4673e-05	3.11765	0.00507329
ENSRNOG00000005849	Aco1	5:56425023-56481218	7.91352e-05	-2.13097	0.00535433
ENSRNOG00000001465	Ids	8:69449800-69466618	7.96768e-05	2.93918	0.0053799
ENSRNOG00000000503	Ppard	20:7818288-7885333	8.01358e-05	2.22677	0.00539981
ENSRNOG00000053468	Tuba1b	7:140614751-140617721	8.22874e-05	2.12594	0.00551091
ENSRNOG00000056427	AABR07007717.1	2:25564883-25565757	8.31066e-05	3.14619	0.00555446
ENSRNOG00000023972	Col4a2	16:83387363-83438561	8.48114e-05	2.18267	0.00564545
ENSRNOG00000026787	Disp2	3:110574416-110589921	9.16457e-05	3.33326	0.00603925
ENSRNOG00000007398	Zfp691	5:138217844-138222534	9.37172e-05	-2.72146	0.0061634
ENSRNOG00000048152	Myo1b	9:54558201-54766054	9.4166e-05	2.31332	0.00618056
ENSRNOG00000006320	Ptges	3:9727407-9738752	9.99377e-05	3.61232	0.00652034
ENSRNOG00000018003	F2rl1	2:25222327-25235275	9.96229e-05	11.9513	0.00652034
ENSRNOG00000033915	Gpt	7:117759082-117761931	9.99377e-05	-3.58403	0.00652034
ENSRNOG00000009549	Fbxo3	3:93968854-94000863	0.000115561	-2.21918	0.00742183
ENSRNOG00000010633	Acsl1	16:48937455-49003246	0.00011723	-2.08568	0.0075144
ENSRNOG00000004535	Kcng3	6:6794807-6842758	0.000121881	7.25573	0.00772217
ENSRNOG00000018646	Hbegf	18:29329763-29340403	0.000121881	8.38433	0.00772217
ENSRNOG00000012404	Thrsp	1:162381252-162385575	0.000125603	-7.82831	0.00792744
ENSRNOG00000010658	LOC103691744	2:264266983-264293046	0.000127342	2.92123	0.0079912
ENSRNOG00000002097	Rasl11b	14:36550339-36554580	0.000143673	-2.04598	0.00894773
ENSRNOG00000060544	Kdm5b	13:51384388-51455357	0.000147058	-2.13385	0.00914121
ENSRNOG00000007830	Apold1	4:168752132-168755023	0.00015855	3.39694	0.00976332
ENSRNOG00000047072	LOC100910656	7:116275816-116284587	0.000158932	3.93339	0.00976853
ENSRNOG00000014030	Synm	1:128692111-128722048	0.000162319	2.39277	0.00993952
ENSRNOG00000013712	Tex261	4:115448707-115453659	0.000167051	2.2438	0.0101725
ENSRNOG00000010896	Tprn	3:2480231-2487710	0.000177689	2.58997	0.0107941
ENSRNOG00000003927	Cd55	13:47126740-47154292	0.000181411	4.59045	0.0108879
ENSRNOG00000030091	Dusp14	10:71363687-71383602	0.000181448	2.26714	0.0108879
ENSRNOG00000052347	AABR07045684.1	KL568128.1:56-3244	0.000181411	5.02933	0.0108879
ENSRNOG00000033844	LOC100912195	1:116565789-116567189	0.000184271	3.81255	0.011017
ENSRNOG00000027694	AABR07050545.1	5:169021559-169022145	0.000188631	-5.7043	0.0112259
ENSRNOG00000016343	Dkk3	1:176940692-176983045	0.000200966	3.074	0.0118217
ENSRNOG00000000891	AABR07035107.1	12:4737816-4741997	0.000204586	-2.43277	0.0120132
ENSRNOG00000058457	Chtopl1	4:163118451-163119391	0.000213838	2.42026	0.0125118
ENSRNOG00000001374	Rasal1	12:41416217-41448668	0.000222028	-2.63126	0.0129449
ENSRNOG00000013541	Sh2d4a	16:23083953-23156962	0.00022178	-2.1472	0.0129449
ENSRNOG00000038184	Camk2n2	11:83975366-83976588	0.000222494	7.1411	0.0129492
ENSRNOG00000011984	Cxcl14	17:9109730-9117750	0.000234004	2.10714	0.013595
ENSRNOG00000017657	Phf23	10:56605139-56609233	0.000234808	-2.05041	0.0136176
ENSRNOG00000062039	AABR07044420.2	20:5347665-5347939	0.000238187	2.86736	0.0137409
ENSRNOG00000038999	RT1-A1	20:5351604-5421098	0.000243964	2.65241	0.0140495
ENSRNOG00000049866	Plcxd1	12:52641221-52676608	0.000244917	13.4846	0.0140797
ENSRNOG00000001989	Alcam	11:50781126-50985083	0.000275696	2.72557	0.0155768
ENSRNOG00000013413	Rorb	1:234252756-234435839	0.000282794	11.8884	0.0158913
ENSRNOG00000000720	MGC95208	11:1814293-1819094	0.000295355	2.10458	0.0164893
ENSRNOG00000011111	Cipc	6:110968060-110990912	0.000304442	-2.62612	0.0168535
ENSRNOG00000061544	Spock2	20:29655225-29677926	0.000311854	2.76307	0.0172059
ENSRNOG00000019330	Procr	3:151285248-151289595	0.000327488	4.34348	0.0179181
ENSRNOG00000049099	AABR07017250.1	15:19429507-19430011	0.000327488	-4.63326	0.0179181
ENSRNOG00000018812	Rpp25	8:62283335-62284716	0.000330123	-2.72616	0.0180323
ENSRNOG00000020225	Dlgap4	3:152752090-152846118	0.000330732	2.16119	0.0180356
ENSRNOG00000029698	Pim3	7:129860113-129863441	0.000339477	2.29148	0.0184818
ENSRNOG00000017783	Sfrp1	16:73372006-73410777	0.000352531	2.30595	0.0190976
ENSRNOG00000023465	Depp1	4:148782478-148784562	0.000353117	2.35797	0.0190979
ENSRNOG00000011156	Clstn3	4:157043924-157078130	0.000361186	2.39346	0.0194703
ENSRNOG00000014187	Igf1r	1:128924965-129206516	0.0003738	2.76303	0.0199865
ENSRNOG00000018775	Cystm1	18:29191730-29232978	0.000419319	2.14035	0.0222754
ENSRNOG00000050465	AABR07041109.1	X:119532512-119532965	0.000428467	2.72487	0.0226152
ENSRNOG00000003127	Spryd4	7:2621960-2623781	0.000440605	-2.00064	0.0231444
ENSRNOG00000001773	Senp2	11:82630435-82664630	0.000450888	2.31689	0.0236468
ENSRNOG00000037658	Gprasp2	X:106360392-106363300	0.000466845	2.58969	0.0244447
ENSRNOG00000007412	Dok1	4:113864214-113866674	0.000476565	-3.52493	0.0248103
ENSRNOG00000025310	Pop7	12:22259712-22260754	0.000477293	-2.13355	0.0248103
ENSRNOG00000009686	Aqp7	5:57358326-57372239	0.000480516	-5.30203	0.0249013
ENSRNOG00000019900	Slc35b2	9:17823399-17827032	0.000490375	-2.10508	0.0252743
ENSRNOG00000047300	Bdkrb2	6:129399467-129429676	0.000512736	3.82864	0.0260995
ENSRNOG00000049270	Ppp2r3b	14:1469747-1476355	0.000512457	2.44005	0.0260995
ENSRNOG00000018358	Nt5dc2	16:7212487-7220540	0.000526898	2.29529	0.0266554
ENSRNOG00000032398	RGD1562136	9:111327401-111347430	0.000561805	-2.05146	0.0281185
ENSRNOG00000054757	Adcy6	7:140270691-140291620	0.000607144	2.26081	0.0300221
ENSRNOG00000002480	Gpr137b	17:90670871-90746804	0.0006655	2.16405	0.0325649
ENSRNOG00000006859	Insig1	4:342301-350515	0.000670901	2.16795	0.0327804
ENSRNOG00000011114	Tbpl1	1:23977687-24002506	0.000723011	2.15129	0.0346571
ENSRNOG00000022082	LOC103690006	4:117800627-117814658	0.000731772	-8.07101	0.0349751
ENSRNOG00000027938	Jcad	17:55670330-55709740	0.000747048	3.32064	0.0355502
ENSRNOG00000050539	Fbln5	6:125644803-125723944	0.000767799	2.00107	0.0363797
ENSRNOG00000015133	Kmt2a	8:49114989-49158971	0.000827953	3.32967	0.0387829
ENSRNOG00000005984	Etv6	4:167754524-167992168	0.0008329	2.98222	0.0389132
ENSRNOG00000001469	Eln	12:24978482-25021863	0.000842394	3.33059	0.0391938
ENSRNOG00000016311	Slc6a2	19:15391580-15431274	0.000859713	5.17996	0.039919
ENSRNOG00000060972	Heca	1:13036908-13050644	0.000873697	2.49198	0.0403508
ENSRNOG00000007327	Pars2	5:126254141-126259200	0.000884207	-3.88063	0.0406081
ENSRNOG00000055236	Gemin4	10:64368808-64375816	0.000884207	-4.17834	0.0406081
ENSRNOG00000010121	Lef1	2:236233238-236345056	0.000889656	-2.01646	0.0408013
ENSRNOG00000004135	RGD1311745	8:132029620-132036472	0.000892257	-2.37226	0.0408453
ENSRNOG00000018992	Dpysl3	18:37716142-37819097	0.000918075	3.88544	0.0416401
ENSRNOG00000059770	AABR07044383.1	20:3791628-3796275	0.000915906	4.62788	0.0416401
ENSRNOG00000013017	Arnt2	1:146399216-146556171	0.000949857	2.99927	0.0427865
ENSRNOG00000003897	Col1a1	10:82745800-82762789	0.00106553	2.54006	0.0467171
ENSRNOG00000018659	Csf1	2:210522374-210550560	0.00108053	2.37329	0.0470611
ENSRNOG00000002886	Myh10	10:55275410-55406732	0.00110022	2.79145	0.0478551
ENSRNOG00000020340	Brd8	18:27398687-27424090	0.00112153	2.06157	0.0485891

## Sheet: Adrenal_CT_vs_H120
Summary of DEIDEGs identified inadrenal glands at CT vs. H120.
Feature ID	Gene name	Position	P-value	Fold change	FDR
ENSRNOG00000033299	Mt-atp8	MT:7757-7961	0	-7.541	0
ENSRNOG00000031506	Ftl1	5:152325870-152326778	6.41798e-128	6.99104	1.05521e-123
ENSRNOG00000020843	LOC100360087	1:101448345-101449829	1.71424e-113	5.78473	1.87898e-109
ENSRNOG00000022392	Hspb8	12:45905370-45920013	1.52495e-58	15.0993	1.25362e-54
ENSRNOG00000009920	LOC680121	11:13499163-13501263	2.28722e-57	7.37458	1.50421e-53
ENSRNOG00000037352	RGD1562747	8:69484173-69489891	1.02094e-56	13.8379	5.59525e-53
ENSRNOG00000021164	Stip1	1:222274132-222293148	5.21802e-48	5.36826	2.4512e-44
ENSRNOG00000003147	Sqstm1	10:35704729-35716294	9.13311e-48	5.33167	3.75405e-44
ENSRNOG00000011668	Nfil3	17:12261101-12276315	2.09464e-46	15.1806	7.6531e-43
ENSRNOG00000015160	Gem	5:25349927-25353661	3.04779e-44	9.95443	1.0022e-40
ENSRNOG00000052142	Ahsa2	14:108265206-108273938	2.17941e-42	11.5361	6.51505e-39
ENSRNOG00000059714	Hsp90aa1	6:135107270-135112775	8.96634e-41	11.3486	2.457e-37
ENSRNOG00000053577	Gramd1b	8:44165366-44327551	1.03206e-40	4.05049	2.61056e-37
ENSRNOG00000003597	Tuba4a	9:82415604-82419288	2.57853e-40	11.7588	6.05642e-37
ENSRNOG00000004019	Phlda1	7:54247459-54249664	4.6943e-38	8.29174	1.02908e-34
ENSRNOG00000023546	Hspb1	12:23839398-23841049	1.29648e-37	28.1258	2.6234e-34
ENSRNOG00000028155	Dnaaf2	6:91481953-91490366	1.35626e-37	22.9248	2.6234e-34
ENSRNOG00000008709	Arhgap32	8:33239138-33392305	2.10375e-37	20.227	3.8432e-34
ENSRNOG00000050655	P4ha1	20:28920615-28971966	2.64276e-37	9.88773	4.57379e-34
ENSRNOG00000021027	Dbp	1:101687854-101692846	8.97321e-37	-12.1146	1.47533e-33
ENSRNOG00000004091	Cwc25	10:85684897-85709568	1.16267e-36	18.6336	1.82057e-33
ENSRNOG00000032917	Zfand2a	12:17252092-17263477	7.04362e-36	35.1406	1.0528e-32
ENSRNOG00000017209	Tubb3	19:56220754-56229813	7.79515e-35	8.10533	1.11447e-31
ENSRNOG00000000902	Hsph1	12:6322667-6341902	8.4394e-34	22.563	1.11005e-30
ENSRNOG00000051563	Giot1	7:13104480-13108723	2.73206e-33	15.0171	3.45533e-30
ENSRNOG00000018487	Slc3a2	1:224906553-224921092	8.78742e-33	3.32637	1.07021e-29
ENSRNOG00000019834	Hsp90ab1	9:17817720-17823243	1.1204e-32	4.22674	1.31579e-29
ENSRNOG00000006931	Eepd1	8:26652120-26758325	1.80011e-32	-8.34124	2.04114e-29
ENSRNOG00000048981	Ahsa1	6:111296416-111304224	9.1433e-32	3.06596	1.0022e-28
ENSRNOG00000051180	LOC100911516	9:101388150-101388833	1.76945e-31	3.28521	1.87693e-28
ENSRNOG00000027405	Ccp110	1:188420460-188444991	2.72622e-30	34.9009	2.80144e-27
ENSRNOG00000059017	AC106292.2	11:65743891-65745038	5.37663e-30	5.95753	5.35757e-27
ENSRNOG00000021475	Ldah	6:33407247-33491725	1.89696e-29	9.77802	1.83464e-26
ENSRNOG00000005698	Ndufa5	4:51590412-51598771	4.41769e-29	9.81368	4.15048e-26
ENSRNOG00000017212	Spsb1	5:166913734-166926636	9.32266e-29	4.98242	8.28532e-26
ENSRNOG00000014338	Slc25a25	3:11442396-11452529	1.21976e-28	5.30778	1.05551e-25
ENSRNOG00000007029	Dnaja1	5:57028466-57039378	1.84073e-28	9.24281	1.55202e-25
ENSRNOG00000028711	Dgat1	7:117566367-117576737	2.62857e-28	11.0706	2.16088e-25
ENSRNOG00000012559	Man1b1	3:2547985-2569049	3.92196e-28	3.74932	3.14551e-25
ENSRNOG00000001198	Fam222a	12:47748164-47793534	5.61852e-28	6.04367	4.3989e-25
ENSRNOG00000013469	Txndc5	17:26925827-26953970	6.26467e-28	3.53846	4.79073e-25
ENSRNOG00000000918	Zbed5	12:30308468-30314519	1.81157e-27	3.40489	1.35386e-24
ENSRNOG00000005413	Creb3l1	3:80892434-80933283	2.41663e-27	20.4095	1.76591e-24
ENSRNOG00000005660	Fam110c	6:49968472-49974728	1.55902e-26	6.6254	1.11446e-23
ENSRNOG00000012106	Dnaja4	8:59278261-59294003	4.41288e-26	22.407	3.08742e-23
ENSRNOG00000049270	Ppp2r3b	14:1469747-1476355	8.32125e-26	8.32657	5.70057e-23
ENSRNOG00000011222	Dynll1	12:47074199-47076572	9.95148e-26	3.66656	6.67825e-23
ENSRNOG00000006444	Fkbp4	4:161748992-161757447	3.25679e-25	3.64304	2.14186e-22
ENSRNOG00000014448	Arntl	1:178039062-178137465	2.673e-24	17.4711	1.72345e-21
ENSRNOG00000021729	Iqub	4:51482169-51586881	4.38623e-24	98.9497	2.7737e-21
ENSRNOG00000016930	Ube2s	1:72580423-72584482	4.59747e-24	2.79028	2.85243e-21
ENSRNOG00000004132	Lasp1	10:85744567-85785133	1.17435e-23	4.63005	7.15114e-21
ENSRNOG00000019018	Plat	16:74098259-74122889	8.85457e-23	9.89905	5.19937e-20
ENSRNOG00000019587	Ptprn	9:82446632-82461903	1.16137e-22	8.43298	6.6999e-20
ENSRNOG00000014900	Crem	17:57031765-57090888	6.96623e-22	5.47249	3.94949e-19
ENSRNOG00000009734	Akr1b8	4:61771969-61828657	8.2445e-22	4.76954	4.59498e-19
ENSRNOG00000004726	Mapkapk2	13:47785160-47831110	1.33991e-21	4.5022	7.34336e-19
ENSRNOG00000032585	AABR07048992.1	5:99031012-99033107	1.75591e-21	4.34069	9.4655e-19
ENSRNOG00000028652	Map10	19:58505810-58508603	4.79509e-21	27.1173	2.54317e-18
ENSRNOG00000002642	Ptges3	7:2479310-2497013	6.24118e-21	2.21132	3.2576e-18
ENSRNOG00000003687	Rgs2	13:60846307-60849094	8.65538e-21	9.68443	4.44711e-18
ENSRNOG00000027089	Ell2	2:2456734-2524237	8.91768e-21	7.95307	4.51138e-18
ENSRNOG00000024349	Cbarp	7:12433932-12441048	1.62795e-20	9.08592	8.11089e-18
ENSRNOG00000034093	AABR07011951.1	2:177651240-177653288	1.80635e-20	4.0126	8.86542e-18
ENSRNOG00000020480	Fads1	1:226234073-226249138	3.79828e-20	-3.935	1.83675e-17
ENSRNOG00000000461	LOC108348112	20:5262119-5269337	8.8756e-20	4.65926	4.2298e-17
ENSRNOG00000002480	Gpr137b	17:90670871-90746804	1.47306e-19	4.54544	6.91981e-17
ENSRNOG00000010170	Tubb4b	3:2441732-2444281	1.73478e-19	3.38366	8.03449e-17
ENSRNOG00000034066	Hspa8	8:44990013-44993179	2.13589e-19	11.7583	9.75481e-17
ENSRNOG00000031216	AABR07055776.1	7:9974624-9976367	4.74782e-19	4.62946	2.13867e-16
ENSRNOG00000001189	Sik1	20:10668410-10680283	5.4168e-19	7.29326	2.40704e-16
ENSRNOG00000047072	LOC100910656	7:116275816-116284587	7.28418e-19	9.28546	3.19368e-16
ENSRNOG00000014743	Hagh	10:14216154-14230515	1.1716e-18	5.57384	5.06917e-16
ENSRNOG00000033765	Eif1	10:88227359-88229765	1.51092e-18	2.24798	6.45242e-16
ENSRNOG00000019466	Agpat2	3:4044541-4055806	1.5771e-18	-3.88115	6.64869e-16
ENSRNOG00000001030	Tsc22d1	15:58554373-58658153	1.68591e-18	2.67655	7.01744e-16
ENSRNOG00000026643	Chordc1	8:17421556-17446165	2.76206e-18	5.06401	1.13531e-15
ENSRNOG00000016831	Serpinh1	1:164301009-164308317	2.85436e-18	2.52228	1.14463e-15
ENSRNOG00000004084	Lratd1	6:39358984-39363458	3.10255e-18	29.6563	1.22917e-15
ENSRNOG00000010873	Pithd1	5:154322550-154332940	3.38529e-18	4.31179	1.32522e-15
ENSRNOG00000013023	Nop53	1:77836195-77844189	3.77011e-18	2.52996	1.4585e-15
ENSRNOG00000061128	Pelo	2:47266737-47268625	3.87438e-18	3.44461	1.48141e-15
ENSRNOG00000008487	Amotl2	8:111209907-111226226	4.00774e-18	4.15844	1.51479e-15
ENSRNOG00000015408	Vil1	9:81689801-81717621	6.8423e-18	81.4981	2.55677e-15
ENSRNOG00000027151	Lrrc58	11:65747035-65759581	9.08553e-18	8.55124	3.35685e-15
ENSRNOG00000019661	Gdf15	16:20555394-20557978	1.53325e-17	9.19308	5.54043e-15
ENSRNOG00000062247	AABR07031521.1	18:17116551-17118501	1.75226e-17	6.03694	6.26299e-15
ENSRNOG00000000661	Hps4	12:50285277-50314406	2.06835e-17	7.39834	7.31328e-15
ENSRNOG00000014287	Stk11	7:12440750-12457513	2.6316e-17	3.05737	9.20583e-15
ENSRNOG00000010574	Ptpn1	3:164665531-164711848	3.57119e-17	4.02334	1.23612e-14
ENSRNOG00000013654	Cbln2	18:83777664-83782930	4.52878e-17	11.8687	1.53526e-14
ENSRNOG00000009642	Cct4	14:107767391-107780270	5.21302e-17	2.24876	1.74918e-14
ENSRNOG00000053362	Gabarapl1	4:163293723-163302858	6.45009e-17	2.07439	2.14241e-14
ENSRNOG00000011310	Pde10a	1:52360295-52544450	9.72155e-17	11.9312	3.19674e-14
ENSRNOG00000012886	Maff	7:120580742-120592095	1.1727e-16	7.04016	3.818e-14
ENSRNOG00000009766	Gpr180	15:103344475-103369630	1.29096e-16	9.78284	4.16183e-14
ENSRNOG00000011039	Gch1	15:23934584-23969011	1.6796e-16	3.64564	5.36216e-14
ENSRNOG00000016596	Hspa4	10:38601623-38642397	2.44202e-16	2.62652	7.72123e-14
ENSRNOG00000017801	Atf4	7:121480722-121482772	3.86328e-16	3.56267	1.20987e-13
ENSRNOG00000007730	Vom2r53	7:13151591-13184257	3.90705e-16	128.914	1.21203e-13
ENSRNOG00000012942	Satb1	9:2190914-2274629	6.679e-16	3.9946	2.05257e-13
ENSRNOG00000000989	Bud31	12:11232963-11240400	7.16162e-16	2.42668	2.18051e-13
ENSRNOG00000019598	Vegfa	9:17340340-17355681	7.85276e-16	2.18634	2.36901e-13
ENSRNOG00000049203	Pex5	4:156983914-157009674	9.68936e-16	4.17964	2.8965e-13
ENSRNOG00000013328	Rbpms	16:61954589-62096497	1.0015e-15	2.5843	2.96687e-13
ENSRNOG00000011511	Stk24	15:106629311-106678918	1.11006e-15	3.65398	3.25912e-13
ENSRNOG00000028103	Psmd3	10:86599219-86611188	1.62923e-15	2.45841	4.74106e-13
ENSRNOG00000006331	Elovl5	8:85259981-85285983	1.69004e-15	3.55967	4.87489e-13
ENSRNOG00000020552	Fosl1	1:220826559-220835066	1.83785e-15	26.0408	5.25512e-13
ENSRNOG00000013712	Tex261	4:115448707-115453659	1.9479e-15	4.53353	5.52179e-13
ENSRNOG00000034242	Vcp	5:58426548-58445953	2.95378e-15	2.11836	8.30164e-13
ENSRNOG00000019090	Cct3	2:187668795-187693610	6.32588e-15	2.12572	1.76283e-12
ENSRNOG00000000503	Ppard	20:7818288-7885333	6.41144e-15	3.56643	1.77166e-12
ENSRNOG00000021719	Slfn5	10:70298518-70312070	6.59148e-15	-5.6367	1.80623e-12
ENSRNOG00000015421	Slc27a3	2:189760746-189765415	8.01537e-15	-2.43646	2.17826e-12
ENSRNOG00000020897	Prpf19	1:226947104-226958144	8.42019e-15	-2.25828	2.26952e-12
ENSRNOG00000005811	LOC688655	6:34553366-34555306	8.74546e-15	6.05679	2.33802e-12
ENSRNOG00000007393	Ndrg1	7:107734322-107775714	9.85527e-15	5.08915	2.61136e-12
ENSRNOG00000046484	Ccdc160	X:140175860-140176829	9.92672e-15	-6.42505	2.61136e-12
ENSRNOG00000021131	Mindy1	2:196462553-196470130	1.04535e-14	-5.22294	2.72812e-12
ENSRNOG00000004791	Arf6	6:91697108-91698255	1.06998e-14	2.47438	2.77039e-12
ENSRNOG00000019253	Bcar1	19:43932553-43955783	1.26894e-14	3.06203	3.20972e-12
ENSRNOG00000017250	Gmpr	17:19543274-19580929	1.4303e-14	3.73092	3.59026e-12
ENSRNOG00000013090	Gadd45g	17:13391466-13393243	1.79588e-14	7.3652	4.47378e-12
ENSRNOG00000019070	St13	7:122585770-122635731	2.26293e-14	2.30263	5.55313e-12
ENSRNOG00000018393	Uts2	5:168078747-168084145	2.43942e-14	38.2736	5.94189e-12
ENSRNOG00000021198	Hist1h2bq	17:43679924-43689311	2.587e-14	2.41787	6.25502e-12
ENSRNOG00000050800	LOC100911576	14:88543629-88574203	3.17377e-14	2.56842	7.61773e-12
ENSRNOG00000058882	Emd	X:156452817-156456035	3.63834e-14	3.701	8.66952e-12
ENSRNOG00000017309	Rsrp1	5:153260929-153264669	5.21583e-14	2.52097	1.2339e-11
ENSRNOG00000009358	Osgin2	5:29663684-29682005	5.3207e-14	5.65213	1.24972e-11
ENSRNOG00000046005	Scd2	1:264059373-264072433	5.9312e-14	-2.68899	1.38323e-11
ENSRNOG00000000981	Scarb1	12:36694959-36761455	6.01431e-14	3.78787	1.39274e-11
ENSRNOG00000018818	Txnl1	18:59059374-59086256	6.35515e-14	2.06282	1.46137e-11
ENSRNOG00000001172	Rnf10	12:47103313-47138128	7.42346e-14	2.54784	1.69518e-11
ENSRNOG00000058601	AABR07036542.1	12:47842420-47847165	7.81664e-14	8.12915	1.77265e-11
ENSRNOG00000019459	Oaz1	7:11752411-11754508	7.98813e-14	2.58365	1.79913e-11
ENSRNOG00000014204	Pacsin3	3:80072488-80081047	1.07955e-13	-3.70645	2.41488e-11
ENSRNOG00000020298	Bag3	1:199941160-199965191	1.24483e-13	13.4963	2.74604e-11
ENSRNOG00000020717	Bod1	10:16259727-16266061	1.25264e-13	3.00439	2.74604e-11
ENSRNOG00000055564	RGD1564664	3:82854776-82856171	1.28128e-13	6.5178	2.79023e-11
ENSRNOG00000011927	Sdc3	5:148923097-148956404	1.48352e-13	-3.71498	3.20939e-11
ENSRNOG00000047250	Gmfb	15:23601367-23606634	1.97704e-13	3.20484	4.24909e-11
ENSRNOG00000061040	Herc4	20:26755910-26830931	2.23495e-13	3.05429	4.7722e-11
ENSRNOG00000014727	Fahd1	10:14214518-14215957	2.92488e-13	3.37273	6.20508e-11
ENSRNOG00000059268	Ppp1r10	20:3329676-3344286	3.12714e-13	3.6226	6.59165e-11
ENSRNOG00000006756	Maged1	X:63803188-63809861	5.02768e-13	3.17785	1.05303e-10
ENSRNOG00000019978	Parg	16:8350325-8457996	6.0908e-13	3.47632	1.26762e-10
ENSRNOG00000019069	Nxf1	1:224957516-224970727	8.20085e-13	2.3272	1.68543e-10
ENSRNOG00000019536	Smim3	18:55744809-55771730	8.51545e-13	2.50001	1.73921e-10
ENSRNOG00000010407	LOC103690024	4:156403015-156427755	9.33873e-13	3.51913	1.89559e-10
ENSRNOG00000005615	Gadd45a	4:97782511-97784842	1.25017e-12	7.85136	2.52205e-10
ENSRNOG00000016374	Fgfr2	1:200590952-200696928	1.4252e-12	2.63708	2.85761e-10
ENSRNOG00000007607	Nr4a1	7:142905757-142920216	1.63555e-12	2.40375	3.2595e-10
ENSRNOG00000056596	Alas1	8:114927721-114940177	1.85689e-12	2.50837	3.67832e-10
ENSRNOG00000000923	Cct6a	12:30491415-30501860	1.99211e-12	2.10189	3.92254e-10
ENSRNOG00000014525	Hspd1	9:61680529-61690956	2.19175e-12	2.0389	4.28996e-10
ENSRNOG00000056651	LOC103690068	1:88192369-88193346	2.54542e-12	9.54956	4.92359e-10
ENSRNOG00000038999	RT1-A1	20:5351604-5421098	3.82118e-12	4.12661	7.34807e-10
ENSRNOG00000011771	Ptp4a1	9:37223728-37231291	3.99125e-12	3.13836	7.63048e-10
ENSRNOG00000002393	Eprs	13:103300931-103371577	4.12175e-12	4.94871	7.83441e-10
ENSRNOG00000000036	Klhdc8a	13:49074643-49082729	4.44142e-12	-2.09752	8.39352e-10
ENSRNOG00000048682	Zwint	20:17075770-17091766	6.9496e-12	2.01507	1.29843e-09
ENSRNOG00000002461	Nid1	17:90553393-90627101	7.94086e-12	3.53957	1.46696e-09
ENSRNOG00000021262	Slc23a2	3:124632491-124724252	7.90217e-12	3.23131	1.46696e-09
ENSRNOG00000019622	Ackr3	9:97355923-97367445	8.42673e-12	5.68915	1.54802e-09
ENSRNOG00000055984	Adrm1	3:175548173-175552947	8.82816e-12	2.2338	1.61276e-09
ENSRNOG00000060728	Tuba1a	7:140637286-140640953	9.09581e-12	3.73369	1.65247e-09
ENSRNOG00000004870	Dyrk3	13:47906230-47916877	1.15242e-11	5.12916	2.07076e-09
ENSRNOG00000012760	Chtop	2:189887856-189899325	1.49839e-11	2.29137	2.67781e-09
ENSRNOG00000019383	Tef	7:123043502-123058604	1.54491e-11	-5.13562	2.74602e-09
ENSRNOG00000010716	Atoh8	4:100067340-100099517	1.62545e-11	7.10039	2.87365e-09
ENSRNOG00000030478	AY172581.9	MT:67-1025	1.87566e-11	2.40422	3.29825e-09
ENSRNOG00000006766	Laptm4b	7:72924798-72968101	2.22176e-11	2.11984	3.86552e-09
ENSRNOG00000000827	Ier3	20:3438797-3440769	2.37899e-11	2.77795	4.09573e-09
ENSRNOG00000020433	Actn4	1:87078019-87147333	2.44443e-11	2.02103	4.18647e-09
ENSRNOG00000004284	Btg1	7:37812830-37815088	2.51122e-11	3.18694	4.27857e-09
ENSRNOG00000016189	Frmd5	3:113483268-113525864	2.67601e-11	2.79212	4.53583e-09
ENSRNOG00000018214	Bok	9:100829551-100840504	3.18534e-11	2.63426	5.34406e-09
ENSRNOG00000016356	Got1	1:263246247-263269762	3.29628e-11	2.44904	5.50211e-09
ENSRNOG00000001201	Cstb	20:10966330-10968432	3.44193e-11	2.49357	5.71622e-09
ENSRNOG00000021812	Scx	7:117519074-117521093	3.72501e-11	11.5169	6.15526e-09
ENSRNOG00000046207	Cbx4	10:108190994-108196217	3.9801e-11	2.64017	6.54388e-09
ENSRNOG00000053468	Tuba1b	7:140614751-140617721	4.10701e-11	3.44895	6.71895e-09
ENSRNOG00000025338	Msi2	10:75681392-76039964	5.67321e-11	2.95305	9.23526e-09
ENSRNOG00000016460	Clu	15:42640145-42665857	5.84688e-11	2.9286	9.47108e-09
ENSRNOG00000003228	Mid1ip1	X:13114568-13116743	7.55855e-11	-2.86728	1.21243e-08
ENSRNOG00000020340	Brd8	18:27398687-27424090	7.88774e-11	3.44526	1.25909e-08
ENSRNOG00000040287	Cyp1b1	6:2307807-2316722	1.12579e-10	2.03364	1.77126e-08
ENSRNOG00000009088	Txnrd1	7:26946124-26984400	1.19317e-10	2.6289	1.85947e-08
ENSRNOG00000013413	Rorb	1:234252756-234435839	1.18858e-10	25.5747	1.85947e-08
ENSRNOG00000001843	Bcl6	11:80255789-80279075	1.37043e-10	12.4012	2.11568e-08
ENSRNOG00000012872	Carnmt1	1:234677691-234704792	1.40058e-10	3.51199	2.15211e-08
ENSRNOG00000014117	Hmox1	19:14508615-14515456	1.42812e-10	5.19264	2.18422e-08
ENSRNOG00000000906	Medag	12:6711746-6740714	1.62867e-10	-6.24077	2.47942e-08
ENSRNOG00000002911	Alb	14:19176276-19191863	1.70784e-10	5.56566	2.58797e-08
ENSRNOG00000007573	Hoxb9	10:84119883-84123390	1.83195e-10	3.21527	2.7633e-08
ENSRNOG00000042838	Junb	19:26092973-26094756	1.85116e-10	4.34016	2.77953e-08
ENSRNOG00000018109	Clic4	5:153568744-153625869	2.09155e-10	5.07963	3.1262e-08
ENSRNOG00000009437	Ewsr1	14:85322295-85350948	2.21028e-10	2.07994	3.28871e-08
ENSRNOG00000057696	Sbk1	1:197659186-197681006	2.61474e-10	-4.44938	3.85563e-08
ENSRNOG00000054446	Sltm	8:76977821-77022837	2.84803e-10	2.58273	4.18088e-08
ENSRNOG00000025701	Nifk	13:34267470-34277530	4.10504e-10	2.59287	5.97283e-08
ENSRNOG00000047706	LOC103690108	20:3791406-3794027	4.17934e-10	3.80235	6.05415e-08
ENSRNOG00000002413	Gpc4	X:139354154-139464798	4.84253e-10	2.13062	6.98407e-08
ENSRNOG00000023509	Irs2	16:83824429-83848684	5.52306e-10	3.25576	7.8963e-08
ENSRNOG00000002408	Rbm47	14:43810118-43837662	6.2356e-10	3.60383	8.77168e-08
ENSRNOG00000002470	Ifi47	10:34277992-34285623	8.04451e-10	-2.68703	1.12088e-07
ENSRNOG00000018107	Zfand5	1:238843337-238852566	8.61477e-10	2.22189	1.19025e-07
ENSRNOG00000003538	Adamts4	13:89622631-89634419	8.86314e-10	79.2933	1.21944e-07
ENSRNOG00000015434	Midn	7:12414732-12424367	9.07493e-10	2.72588	1.24338e-07
ENSRNOG00000018003	F2rl1	2:25222327-25235275	9.13899e-10	27.4468	1.24696e-07
ENSRNOG00000023257	Adamts9	4:124660261-124858250	9.7625e-10	5.25155	1.32653e-07
ENSRNOG00000059770	AABR07044383.1	20:3791628-3796275	1.01802e-09	10.1088	1.3776e-07
ENSRNOG00000057078	Ddit4	20:29509288-29511382	1.11835e-09	5.87104	1.50716e-07
ENSRNOG00000025443	Map1lc3a	3:150801288-150802935	1.23379e-09	3.25884	1.65595e-07
ENSRNOG00000015999	Cirbp	7:12401206-12405022	1.29874e-09	-3.48817	1.73604e-07
ENSRNOG00000019996	Slc16a1	2:207108551-207128554	1.35531e-09	3.1508	1.7987e-07
ENSRNOG00000031662	Slc6a5	1:105284752-105336363	1.35656e-09	2.3862	1.7987e-07
ENSRNOG00000020929	Lin37	1:89010256-89014189	1.4977e-09	2.53959	1.97786e-07
ENSRNOG00000009811	Cnih1	15:23568554-23580395	1.58802e-09	2.18855	2.08043e-07
ENSRNOG00000030447	AC105662.1	5:173148883-173149276	1.7255e-09	9.71778	2.25157e-07
ENSRNOG00000021118	Nomo1	1:102017262-102068870	2.276e-09	2.67069	2.94653e-07
ENSRNOG00000000700	Tmem119	12:48598646-48605704	2.85252e-09	3.53313	3.67841e-07
ENSRNOG00000032669	Serpina1	6:127610242-127632265	3.39712e-09	4.95702	4.3466e-07
ENSRNOG00000007763	Plod1	5:164720586-164747083	3.77174e-09	2.80135	4.78866e-07
ENSRNOG00000058461	Sfpq	5:145079802-145088498	4.31915e-09	2.52301	5.44163e-07
ENSRNOG00000023376	Riok3	18:3565165-3590739	4.42343e-09	2.37484	5.55175e-07
ENSRNOG00000042592	Rgs10	1:199782077-199823386	4.46026e-09	2.93551	5.57668e-07
ENSRNOG00000048308	Dr1	14:2463642-2474780	4.57602e-09	-7.60041	5.69975e-07
ENSRNOG00000020938	Ppp1r15a	1:101511900-101514974	4.72631e-09	2.76311	5.86473e-07
ENSRNOG00000009700	Dync1i1	4:30807878-31121090	5.61268e-09	2.55669	6.91243e-07
ENSRNOG00000023465	Depp1	4:148782478-148784562	5.86209e-09	3.65632	7.19265e-07
ENSRNOG00000009946	Ldlr	8:22750335-22774903	6.76605e-09	2.10163	8.2403e-07
ENSRNOG00000016989	Dolk	3:8850153-8852192	7.08411e-09	-2.93112	8.59582e-07
ENSRNOG00000000576	Anapc16	20:29544628-29558321	7.17747e-09	2.72652	8.67709e-07
ENSRNOG00000009205	Lmo4	2:250218640-250241673	8.46339e-09	2.9809	1.0157e-06
ENSRNOG00000008297	Oser1	3:159784127-159802952	1.02169e-08	2.56231	1.21286e-06
ENSRNOG00000013408	Npas2	9:45901740-46081880	1.07135e-08	8.63961	1.26724e-06
ENSRNOG00000036697	Mafg	10:109806158-109811323	1.10234e-08	2.70597	1.29459e-06
ENSRNOG00000052730	Psmb3	10:85646632-85653729	1.13406e-08	2.03299	1.31771e-06
ENSRNOG00000013179	Tinagl1	5:148382705-148392697	1.1963e-08	2.23008	1.38514e-06
ENSRNOG00000019050	Ifit1	1:252944102-252946170	1.28932e-08	-14.729	1.4876e-06
ENSRNOG00000010524	Cryab	8:55178288-55182545	1.40112e-08	3.80069	1.609e-06
ENSRNOG00000046171	AABR07035839.1	12:24590644-24619639	1.40432e-08	6.52714	1.609e-06
ENSRNOG00000005292	Trip11	6:125742795-125812517	1.45123e-08	6.08638	1.65697e-06
ENSRNOG00000007817	Kctd6	15:18484509-18493366	1.60412e-08	4.60371	1.81266e-06
ENSRNOG00000018994	Psmc4	1:84978205-84986581	1.73317e-08	2.0093	1.94511e-06
ENSRNOG00000058646	Zfp36l1	6:103308044-103313074	1.86753e-08	2.14776	2.0817e-06
ENSRNOG00000003177	Mat2b	10:25832071-25847994	1.9726e-08	-2.63507	2.18401e-06
ENSRNOG00000003551	B4galt3	13:89643880-89649906	1.98671e-08	3.98245	2.19225e-06
ENSRNOG00000000521	Cdkn1a	20:6351457-6358864	2.35949e-08	5.95141	2.57764e-06
ENSRNOG00000019202	Pvr	1:80820049-80835701	2.4776e-08	4.97149	2.69771e-06
ENSRNOG00000032902	Ybx1-ps3	10:40380387-40381886	2.9468e-08	2.05676	3.17704e-06
ENSRNOG00000059589	Lmbr1	4:2116093-2201749	3.26113e-08	7.6506	3.50444e-06
ENSRNOG00000027145	Rora	8:75516903-75607212	3.65646e-08	4.51524	3.8929e-06
ENSRNOG00000009639	Zrsr1	14:107750161-107751892	3.90691e-08	3.15154	4.11766e-06
ENSRNOG00000003515	Ephx1	13:99271365-99300579	4.96315e-08	-2.73414	5.11609e-06
ENSRNOG00000019949	Mrps12	1:86920679-86923575	4.96027e-08	2.27593	5.11609e-06
ENSRNOG00000016275	Ttr	18:15532962-15540177	5.87178e-08	6.41124	6.01501e-06
ENSRNOG00000031090	RT1-CE7	20:4694471-4896970	5.94081e-08	2.01817	6.06683e-06
ENSRNOG00000019822	Gadd45b	7:11646268-11648322	6.32487e-08	3.6273	6.43903e-06
ENSRNOG00000000909	Uspl1	12:6929977-6956984	6.99122e-08	3.01465	7.09544e-06
ENSRNOG00000016326	Cx3cl1	19:10644243-10653800	7.09257e-08	-3.69307	7.17615e-06
ENSRNOG00000047396	Rmnd5b	10:34979922-34990943	8.05504e-08	-8.04135	8.11303e-06
ENSRNOG00000049402	Nbl1	5:157524512-157535664	8.85788e-08	2.17688	8.8533e-06
ENSRNOG00000018783	Bcas2	2:205662587-205670511	9.14865e-08	-2.36462	9.08867e-06
ENSRNOG00000031612	Gls2	7:2605718-2621852	9.74875e-08	3.62925	9.62667e-06
ENSRNOG00000012582	Eif4ebp1	16:68954874-68968248	1.07506e-07	-2.40831	1.05842e-05
ENSRNOG00000002387	Tceal1	X:107370430-107372338	1.08374e-07	-2.62046	1.06378e-05
ENSRNOG00000024428	Kif20a	18:27424327-27432814	1.09153e-07	7.19655	1.06824e-05
ENSRNOG00000032708	RT1-Bb	20:4039412-4049711	1.09517e-07	2.63877	1.06862e-05
ENSRNOG00000005670	Art4	4:170830850-170841187	1.1004e-07	-5.01404	1.07054e-05
ENSRNOG00000008274	Xpc	4:123134456-123161985	1.11953e-07	-4.26499	1.08275e-05
ENSRNOG00000054945	AABR07015081.2	14:46653039-46657975	1.13644e-07	12.1826	1.09588e-05
ENSRNOG00000036696	Hgs	10:109638766-109657456	1.14481e-07	2.31876	1.10073e-05
ENSRNOG00000016483	Myo16	16:84575149-84939323	1.3284e-07	10.5394	1.27353e-05
ENSRNOG00000049814	LOC100910882	3:152226709-152259156	1.33846e-07	13.0235	1.27573e-05
ENSRNOG00000006420	Rbm38	3:171037956-171050475	1.38108e-07	5.23477	1.30876e-05
ENSRNOG00000000506	Tead3	20:7908225-7930929	1.49567e-07	3.78922	1.4052e-05
ENSRNOG00000017911	Tcaf1	4:72124233-72143748	1.61169e-07	-2.96255	1.50072e-05
ENSRNOG00000033803	LOC100360841	9:69790830-69791196	1.62052e-07	-2.51907	1.50105e-05
ENSRNOG00000018183	Ubr4	5:157848205-157956132	1.69031e-07	2.74133	1.55693e-05
ENSRNOG00000010096	Azi2	8:126411828-126434579	1.70678e-07	2.49465	1.56771e-05
ENSRNOG00000052498	Grb14	3:50937668-51054378	1.77856e-07	-3.25112	1.62909e-05
ENSRNOG00000000891	AABR07035107.1	12:4737816-4741997	1.78853e-07	-4.18565	1.63367e-05
ENSRNOG00000001700	Whrn	5:79234949-79317206	1.85564e-07	2.35185	1.69028e-05
ENSRNOG00000021984	Rgs7	13:93095199-93307199	1.89167e-07	6.61519	1.71833e-05
ENSRNOG00000005538	Psmd11	10:67810654-67857223	1.92015e-07	2.33705	1.73463e-05
ENSRNOG00000004693	Pbx1	13:86390740-86451002	1.95709e-07	2.59616	1.75865e-05
ENSRNOG00000030091	Dusp14	10:71363687-71383602	1.95745e-07	3.01918	1.75865e-05
ENSRNOG00000001525	Igsf11	11:64286693-64421248	2.01797e-07	-2.46632	1.80809e-05
ENSRNOG00000004608	Pam16	10:11146358-11153936	2.48519e-07	2.201	2.20271e-05
ENSRNOG00000005248	Slc1a4	14:104581189-104612597	2.4947e-07	8.01417	2.2052e-05
ENSRNOG00000049828	Crlf2	14:1456843-1461543	2.52412e-07	2.11339	2.22522e-05
ENSRNOG00000018812	Rpp25	8:62283335-62284716	2.64008e-07	-5.21866	2.32122e-05
ENSRNOG00000003104	Trpv2	10:48903539-48925030	2.65282e-07	-3.01813	2.3262e-05
ENSRNOG00000018484	Plk3	5:135997724-136002900	2.77631e-07	2.63644	2.42802e-05
ENSRNOG00000009549	Fbxo3	3:93968854-94000863	2.81788e-07	-3.19566	2.45417e-05
ENSRNOG00000031965	Impdh2	8:117347028-117351610	2.98961e-07	2.00885	2.58024e-05
ENSRNOG00000001277	Mafk	12:16923989-16934706	3.0808e-07	2.65807	2.64507e-05
ENSRNOG00000003977	Dusp1	10:16970625-16973418	3.08071e-07	4.29197	2.64507e-05
ENSRNOG00000033663	P4ha2	10:39435226-39464188	3.15769e-07	2.30685	2.70402e-05
ENSRNOG00000013541	Sh2d4a	16:23083953-23156962	3.28127e-07	-3.12257	2.80255e-05
ENSRNOG00000010984	Anxa11	16:3867207-3912148	3.49856e-07	2.16003	2.97269e-05
ENSRNOG00000028368	Etnk2	13:50481162-50499140	3.61038e-07	-2.45581	3.05193e-05
ENSRNOG00000052894	Epg5	18:74299930-74395547	3.77513e-07	3.80972	3.17488e-05
ENSRNOG00000015496	Tpm4	16:19385735-19399903	3.78919e-07	2.10855	3.17857e-05
ENSRNOG00000019559	Eaf1	16:7588216-7602966	3.88268e-07	2.82895	3.23226e-05
ENSRNOG00000012100	Ssbp1	4:68634928-68645172	4.22705e-07	-2.58301	3.51005e-05
ENSRNOG00000008510	Abtb2	3:93495105-93647721	4.26269e-07	7.00126	3.53073e-05
ENSRNOG00000014625	Atp5f1d	7:12426808-12432130	4.44082e-07	2.09552	3.66903e-05
ENSRNOG00000050869	Cebpd	11:89008007-89009146	4.67232e-07	3.31784	3.85063e-05
ENSRNOG00000010624	Ap3b1	2:24024790-24226224	4.81226e-07	2.2797	3.94617e-05
ENSRNOG00000013948	Zc3hav1	4:66011914-66062089	4.80937e-07	2.14766	3.94617e-05
ENSRNOG00000019189	Acat2	1:47972398-47992653	5.46266e-07	2.05084	4.44625e-05
ENSRNOG00000007544	Il23r	4:98203957-98305173	6.13731e-07	6.58321	4.98304e-05
ENSRNOG00000004500	Myc	7:102586312-102591240	6.59584e-07	2.62341	5.30296e-05
ENSRNOG00000048152	Myo1b	9:54558201-54766054	7.13648e-07	2.88601	5.7097e-05
ENSRNOG00000002232	Aff1	14:7226585-7384876	8.05032e-07	8.17381	6.37087e-05
ENSRNOG00000030667	Ppm1b	6:8218695-8280124	8.05973e-07	2.20847	6.37087e-05
ENSRNOG00000020225	Dlgap4	3:152752090-152846118	8.13852e-07	2.72251	6.40237e-05
ENSRNOG00000028616	Pck1	3:171213935-171219871	9.37297e-07	2.95882	7.32093e-05
ENSRNOG00000009887	Arih1	8:64166359-64268555	9.43665e-07	2.56658	7.35321e-05
ENSRNOG00000010819	Hspa4l	2:127625682-127677503	9.63858e-07	4.41682	7.4928e-05
ENSRNOG00000016281	Col4a1	16:83522161-83632153	9.66423e-07	2.20838	7.49502e-05
ENSRNOG00000036698	Nploc4	10:109552648-109610030	1.03354e-06	2.20513	7.99666e-05
ENSRNOG00000014155	Spart	2:144522071-144548917	1.07206e-06	-3.14574	8.27528e-05
ENSRNOG00000010896	Tprn	3:2480231-2487710	1.10546e-06	3.32498	8.49318e-05
ENSRNOG00000056457	Gpd1	7:141370490-141377928	1.22639e-06	-2.53487	9.40029e-05
ENSRNOG00000006086	Lynx1	7:115982875-115988090	1.25152e-06	2.31842	9.57064e-05
ENSRNOG00000033169	Cpeb4	10:15987920-16046033	1.26116e-06	3.88236	9.59971e-05
ENSRNOG00000048174	Uqcrq	10:38779131-38782419	1.26624e-06	2.22122	9.6161e-05
ENSRNOG00000013707	Spata13	15:40937707-41066769	1.37604e-06	3.40432	0.00010378
ENSRNOG00000043201	Coq8a	13:98451636-98480419	1.40287e-06	-2.11062	0.000105562
ENSRNOG00000000158	Cdo1	18:40701983-40716686	1.41849e-06	-2.79086	0.000106494
ENSRNOG00000006698	Rab33a	X:135348435-135360203	1.85785e-06	-2.40318	0.000135831
ENSRNOG00000062155	AC134224.2	1:221151826-221153278	1.88963e-06	2.71095	0.000137775
ENSRNOG00000002218	Stbd1	14:16976355-16979760	1.91535e-06	2.51706	0.000139342
ENSRNOG00000008748	Pex2	2:98252924-98269184	2.00819e-06	-2.499	0.000144814
ENSRNOG00000014021	Matn4	3:160838631-160853650	2.00392e-06	4.76177	0.000144814
ENSRNOG00000025484	Tmem177	13:35929818-35933243	2.00392e-06	-5.42265	0.000144814
ENSRNOG00000003334	Klhl21	5:169181417-169190073	2.07351e-06	2.3616	0.000148583
ENSRNOG00000016552	Hmgcs1	2:52431600-52445055	2.074e-06	-3.38623	0.000148583
ENSRNOG00000020703	Sipa1l3	1:87260834-87468288	2.20473e-06	3.31678	0.000157605
ENSRNOG00000014310	Tmtc4	15:109339563-109394927	2.38216e-06	-2.55476	0.000169185
ENSRNOG00000015415	Rhoq	6:10533150-10568581	2.67754e-06	3.09107	0.000186933
ENSRNOG00000045683	LOC102553715	10:49000972-49003931	2.73426e-06	3.55731	0.000190489
ENSRNOG00000033433	Csrnp1	8:128659867-128672284	2.81064e-06	2.83029	0.000195396
ENSRNOG00000012561	Arhgef10	16:79725642-79793619	2.8368e-06	3.1477	0.000196597
ENSRNOG00000011778	Blvra	3:119561289-119577806	2.9076e-06	2.26765	0.000200863
ENSRNOG00000016573	Dgat2	1:164113458-164143818	2.98299e-06	-3.22704	0.000205639
ENSRNOG00000004255	Usf1	13:89797799-89805558	3.01566e-06	-2.04522	0.000207456
ENSRNOG00000046112	Dedd2	1:82072543-82088275	3.07064e-06	3.81309	0.000210358
ENSRNOG00000053210	Zc3h11a	13:50196041-50234862	3.15008e-06	2.05584	0.000215351
ENSRNOG00000024533	Eogt	4:129477806-129515435	3.33722e-06	-3.19997	0.000227672
ENSRNOG00000004535	Kcng3	6:6794807-6842758	3.34564e-06	9.82278	0.000227774
ENSRNOG00000022054	Paqr7	5:152708774-152720229	3.38316e-06	-2.70235	0.000229852
ENSRNOG00000021916	Slc16a12	1:252976643-253000760	3.88648e-06	-3.59477	0.000262421
ENSRNOG00000029810	LOC100911766	1:214454089-214473741	3.9014e-06	-2.29049	0.000262889
ENSRNOG00000022702	Fbxo22	8:59769993-59786065	3.98726e-06	-2.43409	0.000267577
ENSRNOG00000004049	Baiap2	10:109107388-109187115	4.18954e-06	2.98477	0.000280009
ENSRNOG00000010121	Lef1	2:236233238-236345056	4.40329e-06	-2.8162	0.000293104
ENSRNOG00000050560	Polr2i	1:91041213-91042230	4.62083e-06	-2.98428	0.000305114
ENSRNOG00000020392	Stxbp3	2:211595658-211638788	4.7319e-06	-3.00347	0.000311821
ENSRNOG00000057284	Cenpb	3:123721485-123723524	4.92354e-06	-2.25566	0.000323155
ENSRNOG00000015285	Lrp4	3:80362857-80416679	4.94831e-06	5.16648	0.000324134
ENSRNOG00000021056	Kcnj14	1:101805530-101809544	5.66179e-06	3.93286	0.000369398
ENSRNOG00000026128	Cpne8	7:131623180-131798236	5.66179e-06	3.83029	0.000369398
ENSRNOG00000004373	Ddx39a	19:24846937-24854953	5.67757e-06	2.77634	0.000369694
ENSRNOG00000009910	Swap70	1:174862697-174924078	6.0807e-06	2.52042	0.000392832
ENSRNOG00000016924	Acly	10:88392247-88442845	6.19132e-06	-2.0196	0.000399194
ENSRNOG00000051831	5_8S_rRNA	1:11906440-11906593	6.8948e-06	-11.5667	0.000443682
ENSRNOG00000000796	Ranbp2	20:28027053-28076664	7.22532e-06	2.82255	0.000462238
ENSRNOG00000017037	Otud3	5:157346285-157368472	7.28965e-06	3.58152	0.000465448
ENSRNOG00000014648	Efnb2	16:86631063-86675049	7.3548e-06	2.92808	0.000468697
ENSRNOG00000037658	Gprasp2	X:106360392-106363300	7.46458e-06	3.21067	0.000473856
ENSRNOG00000028895	Rtp4	11:80638944-80650802	7.96084e-06	-4.68478	0.000501487
ENSRNOG00000006727	Dtd2	6:72780542-72786830	8.39519e-06	-3.83361	0.000524827
ENSRNOG00000030639	Usp13	2:119197238-119317500	8.39519e-06	3.58303	0.000524827
ENSRNOG00000030721	Fbrsl1	12:52356831-52377475	8.38738e-06	2.35495	0.000524827
ENSRNOG00000019422	Egr1	18:27657627-27661429	8.54911e-06	4.08587	0.000533435
ENSRNOG00000046912	Nr1d2	15:8730870-8757165	8.56551e-06	-2.57623	0.000533446
ENSRNOG00000002254	Tmem33	14:42535700-42560174	9.31599e-06	2.57181	0.000577996
ENSRNOG00000043069	Sec22a	11:68633159-68686548	9.58822e-06	-2.1956	0.000593765
ENSRNOG00000000648	Jmjd1c	20:22751742-22882672	1.00308e-05	2.89022	0.000618841
ENSRNOG00000005359	Csrnp3	3:51883558-52120290	1.05812e-05	8.10174	0.000649143
ENSRNOG00000058908	Hmgb1	16:37500016-37502237	1.11404e-05	-2.10903	0.000679646
ENSRNOG00000048848	Ccdc9	1:78213222-78224319	1.12942e-05	-2.00115	0.000687754
ENSRNOG00000004466	Fam210b	3:170354140-170362513	1.21025e-05	-2.05103	0.000730211
ENSRNOG00000043189	Trub2	3:8338483-8348746	1.22622e-05	-2.51755	0.000738492
ENSRNOG00000018477	Otud4	19:31899086-31942180	1.23123e-05	2.92266	0.000740155
ENSRNOG00000048248	LOC100910446	1:23543425-23556241	1.33864e-05	13.5705	0.000798882
ENSRNOG00000029614	Robo1	11:9642364-10143317	1.34641e-05	2.35132	0.000802063
ENSRNOG00000009570	Pdxp	7:120140459-120145908	1.38694e-05	2.99941	0.000821744
ENSRNOG00000006539	Pex16	3:81283136-81292573	1.50401e-05	-2.18655	0.000881576
ENSRNOG00000005849	Aco1	5:56425023-56481218	1.54835e-05	-2.40386	0.00090434
ENSRNOG00000062127	AC134224.1	1:221154560-221156910	1.54806e-05	2.28346	0.00090434
ENSRNOG00000051372	Mycn	6:38222554-38228379	1.56107e-05	4.09497	0.000910154
ENSRNOG00000047005	Kcnk5	15:4554602-4597000	1.70072e-05	2.60815	0.000986328
ENSRNOG00000021062	Fxyd5	1:89464859-89474252	1.89681e-05	2.0627	0.00109618
ENSRNOG00000006178	Dync1h1	6:134958853-135085769	1.90019e-05	2.05123	0.00109621
ENSRNOG00000016791	Chka	1:219077770-219126220	2.00409e-05	2.12594	0.00114609
ENSRNOG00000045636	Fasn	10:109987734-110005901	2.0598e-05	-3.02521	0.00117591
ENSRNOG00000056427	AABR07007717.1	2:25564883-25565757	2.28734e-05	3.42649	0.00129905
ENSRNOG00000010633	Acsl1	16:48937455-49003246	2.34246e-05	-2.11274	0.00132805
ENSRNOG00000015796	Msh2	6:11215962-11274932	2.40343e-05	-3.01222	0.00136028
ENSRNOG00000014426	Lox	18:47500329-47577819	2.50663e-05	2.13906	0.00141381
ENSRNOG00000010658	LOC103691744	2:264266983-264293046	2.57677e-05	3.3765	0.00144348
ENSRNOG00000018317	Aak1	4:118655727-118795774	2.58135e-05	4.10475	0.00144358
ENSRNOG00000001113	Mmd2	12:14021726-14078134	2.75379e-05	-2.08922	0.0015219
ENSRNOG00000019542	MGC108823	18:55576238-55584957	2.89521e-05	-3.52132	0.00159469
ENSRNOG00000053040	AC094643.2	7:11181385-11182279	2.99618e-05	-2.68519	0.00164206
ENSRNOG00000004891	Arl14ep	3:97983685-97993684	3.0686e-05	-3.65804	0.00167061
ENSRNOG00000014187	Igf1r	1:128924965-129206516	3.0686e-05	3.15731	0.00167061
ENSRNOG00000025509	Apbb2	14:43512900-43523080	3.0686e-05	3.28467	0.00167061
ENSRNOG00000005371	Klhl29	6:29178857-29483460	3.14486e-05	2.74846	0.00170647
ENSRNOG00000012386	Zbtb38	8:104589620-104593625	3.20449e-05	2.66461	0.00173597
ENSRNOG00000005802	Usp24	5:125896724-126030401	3.2487e-05	2.54247	0.00175414
ENSRNOG00000012847	Scgb1c1	1:213595239-213596459	3.37451e-05	2.91698	0.00181314
ENSRNOG00000003927	Cd55	13:47126740-47154292	3.42769e-05	5.43338	0.00183871
ENSRNOG00000042126	Lsm5	4:87016002-87019219	3.93679e-05	-2.13446	0.00209119
ENSRNOG00000006048	Ezh2	4:77284403-77347011	4.03197e-05	5.07675	0.00213156
ENSRNOG00000017833	Actn2	17:66304500-66397653	4.19869e-05	3.04053	0.00220568
ENSRNOG00000013934	Dennd2b	1:174137119-174289647	4.67305e-05	-3.31744	0.00243139
ENSRNOG00000022582	Ccnq	10:66019519-66020682	4.70912e-05	-2.94394	0.00244243
ENSRNOG00000033215	RT1-Db1	20:4087617-4097190	4.95067e-05	2.22999	0.00255161
ENSRNOG00000019390	Klhl40	8:130416354-130421871	4.96222e-05	-8.66639	0.00255356
ENSRNOG00000057556	Pdzrn3	4:133717138-133951264	4.99791e-05	-2.90592	0.0025639
ENSRNOG00000020379	Cog8	19:39246624-39257451	5.19281e-05	-2.66809	0.00264737
ENSRNOG00000018371	Tubb6	18:63130541-63140181	5.28577e-05	3.4523	0.00268643
ENSRNOG00000009035	Malsu1	4:78735278-78744102	5.36154e-05	-2.30651	0.00271402
ENSRNOG00000009846	Frg1	16:53957857-53978865	5.64067e-05	-2.43133	0.00283179
ENSRNOG00000043098	Mt2A	19:11307966-11308740	5.79257e-05	-3.00576	0.00289761
ENSRNOG00000019068	Ctrb1	19:43906291-43911057	6.1273e-05	21.8999	0.00303897
ENSRNOG00000049866	Plcxd1	12:52641221-52676608	6.1273e-05	16.2296	0.00303897
ENSRNOG00000061099	AABR07033324.1	11:17336443-17340373	6.25847e-05	3.40747	0.00309469
ENSRNOG00000010381	Mknk1	5:134691880-134730893	6.44713e-05	-2.10202	0.00316874
ENSRNOG00000024578	Ttyh2	10:103206013-103248862	6.66063e-05	-2.22103	0.00325925
ENSRNOG00000055567	Fmnl2	3:38559913-38675878	6.76733e-05	2.31205	0.00329869
ENSRNOG00000057125	Ddr1	20:3552928-3575780	6.77134e-05	-3.08717	0.00329869
ENSRNOG00000009311	Fstl3	7:12804918-12810570	6.79802e-05	2.6627	0.00330679
ENSRNOG00000007582	Zswim4	19:25320682-25345790	6.84866e-05	2.66493	0.00331671
ENSRNOG00000017382	Snx33	8:61584655-61595032	7.48993e-05	-2.55241	0.00359549
ENSRNOG00000031939	AABR07066416.1	9:8629215-8632017	7.53729e-05	-3.1639	0.00361296
ENSRNOG00000027654	Appbp2	10:72503346-72545141	7.75406e-05	-2.34155	0.00370606
ENSRNOG00000003075	Tmem39a	11:64723185-64752544	7.92268e-05	2.71153	0.00378115
ENSRNOG00000043451	Spp1	14:6673685-6679901	8.16183e-05	4.81159	0.0038784
ENSRNOG00000017601	Srd5a1	1:36320460-36354756	8.52619e-05	-2.00689	0.00403406
ENSRNOG00000007829	Lactb2	5:4982347-5005109	8.8706e-05	-2.14334	0.00417299
ENSRNOG00000016152	Dek	17:17965880-17987834	9.3148e-05	-2.34618	0.00436945
ENSRNOG00000045840	Hist2h4a	4:170763604-170763916	9.39309e-05	2.24197	0.0043999
ENSRNOG00000001773	Senp2	11:82630435-82664630	9.97589e-05	2.4909	0.00463308
ENSRNOG00000016156	Nptxr	7:121011679-121029754	0.000101536	3.49787	0.00468278
ENSRNOG00000058457	Chtopl1	4:163118451-163119391	0.000105936	2.53315	0.00483574
ENSRNOG00000012565	Cln8	16:79828323-79838212	0.000112706	2.80624	0.00511186
ENSRNOG00000006670	Rai2	X:34731890-34794589	0.000113502	-4.27553	0.00513471
ENSRNOG00000014903	Zfyve27	1:261415190-261438539	0.000114817	2.39433	0.00517196
ENSRNOG00000013111	Mettl3	15:28710299-28721127	0.000115729	-2.0826	0.0052059
ENSRNOG00000003897	Col1a1	10:82745800-82762789	0.000117865	2.23026	0.0052803
ENSRNOG00000001465	Ids	8:69449800-69466618	0.000124036	3.23412	0.00553414
ENSRNOG00000011461	Ap3m1	15:3436360-3454279	0.000124971	-2.34102	0.00556833
ENSRNOG00000009983	Lrrc42	5:126835154-126856292	0.000138361	-2.60927	0.00613169
ENSRNOG00000047783	Tmem200a	1:20331975-20412381	0.000142533	-2.03738	0.0062996
ENSRNOG00000021817	Irak2	4:145594574-145651053	0.000143169	2.29043	0.00631923
ENSRNOG00000019082	LOC103690016	1:67368383-67390141	0.000143401	-3.96686	0.006321
ENSRNOG00000008837	Ass1	3:10327413-10375826	0.000147786	4.05447	0.00649686
ENSRNOG00000052357	Fosl2	6:25598935-25616995	0.000150936	2.18039	0.00661763
ENSRNOG00000006700	Wdyhv1	7:97957002-97994586	0.000156847	2.4838	0.00681053
ENSRNOG00000010642	Lysmd2	8:82560760-82577019	0.000157191	-2.67823	0.00681053
ENSRNOG00000031391	Ceacam16	1:80773818-80783898	0.000157614	2.03188	0.00681053
ENSRNOG00000050193	LOC100912262	12:29012694-29080011	0.00015753	5.3314	0.00681053
ENSRNOG00000050343	Jmy	2:23042188-23097610	0.000156616	5.87684	0.00681053
ENSRNOG00000032398	RGD1562136	9:111327401-111347430	0.000159933	-2.25158	0.00689264
ENSRNOG00000025608	Lrat	2:181896304-181905300	0.00016626	2.25034	0.00713723
ENSRNOG00000018246	Tdp2	17:42229641-42241066	0.000170019	-2.45074	0.0072835
ENSRNOG00000010161	Myo10	2:77868411-78071309	0.000173644	2.26302	0.00742513
ENSRNOG00000006206	Tmem106b	4:39517547-39535169	0.000180859	-2.16167	0.00766389
ENSRNOG00000013751	Plpbp	16:69163576-69176036	0.000182044	-2.38344	0.00770418
ENSRNOG00000046560	AC109096.1	1:220836091-220836504	0.000187913	-2.62409	0.00792199
ENSRNOG00000027357	Sox17	5:14890407-14895907	0.000192915	3.70964	0.00808104
ENSRNOG00000047503	Apoc3	8:50529317-50531498	0.000192915	3.84804	0.00808104
ENSRNOG00000001851	Far2	4:182483193-182565436	0.000196531	2.81688	0.0081969
ENSRNOG00000033776	LOC100359668	6:76652205-76652757	0.000196837	4.30016	0.0081969
ENSRNOG00000014367	Ephb6	4:70903252-70918514	0.00021641	-2.50631	0.00896248
ENSRNOG00000010888	Ankrd33b	2:84361060-84437084	0.000222382	6.10223	0.00918669
ENSRNOG00000045918	Jarid2	17:20184244-20364714	0.00022501	2.73535	0.00927195
ENSRNOG00000018408	RGD1307554	1:84361735-84386751	0.000226389	2.61976	0.00931708
ENSRNOG00000003745	Atf3	13:109817727-109849632	0.000250539	6.12328	0.0101584
ENSRNOG00000013269	Tnfsf10	2:113007548-113026899	0.000270074	-2.16234	0.0109101
ENSRNOG00000025394	Tanc1	3:45683992-45917745	0.000273834	2.61516	0.0110079
ENSRNOG00000047118	LOC683897	20:48275761-48294948	0.000273834	-2.88134	0.0110079
ENSRNOG00000047924	Zbtb7c	18:72005580-72462292	0.000273834	2.69669	0.0110079
ENSRNOG00000011238	Tiparp	2:157316265-157341469	0.000278832	3.47903	0.0111408
ENSRNOG00000029330	Ca5b	X:32232141-32292072	0.000278647	-3.64415	0.0111408
ENSRNOG00000050786	AC103024.2	10:34316836-34317161	0.000278761	-5.69976	0.0111408
ENSRNOG00000002040	Bmp2k	14:14129724-14192048	0.000296915	3.56012	0.0117208
ENSRNOG00000052421	AABR07012475.2	2:196587205-196591324	0.000296915	-4.12529	0.0117208
ENSRNOG00000054080	Cgnl1	8:78126674-78233430	0.000304101	-2.13258	0.0119614
ENSRNOG00000019657	Mk1	16:20531719-20534209	0.000309676	-3.19441	0.0121662
ENSRNOG00000008892	Parp2	15:27739250-27749648	0.000311411	-2.92749	0.0121906
ENSRNOG00000026880	Usp38	19:30668601-30699859	0.000316308	2.53986	0.0123383
ENSRNOG00000022082	LOC103690006	4:117800627-117814658	0.000317271	2.73509	0.0123612
ENSRNOG00000012343	Pdp2	19:597426-601469	0.000321656	2.01751	0.0125172
ENSRNOG00000004217	Stk10	10:17421074-17519706	0.000326651	3.96834	0.0126368
ENSRNOG00000020881	Frmd8	1:221213311-221233962	0.000351741	-2.35193	0.0134648
ENSRNOG00000028185	Tstd3	5:35892736-35902262	0.000351551	-2.03052	0.0134648
ENSRNOG00000030410	Zfp958	12:5485902-5490935	0.000354289	-2.63066	0.0135466
ENSRNOG00000025372	Glce	8:67006591-67040005	0.000360077	-2.93959	0.0137201
ENSRNOG00000050453	AABR07002848.1	1:86873252-86888958	0.000360077	2.76132	0.0137201
ENSRNOG00000020110	B4gat1	1:220416017-220418240	0.000399785	-2.73018	0.0148388
ENSRNOG00000025558	Palm2	5:74649764-74788497	0.000404266	7.11838	0.0149701
ENSRNOG00000010643	Kank2	8:22791994-22821397	0.00040642	-2.01252	0.015033
ENSRNOG00000022268	Pnpla3	7:125034763-125055976	0.000408349	-4.94976	0.0150704
ENSRNOG00000042556	Bmyc	3:2916661-2917421	0.000428005	-2.48309	0.0157252
ENSRNOG00000007329	Frmd6	6:93281407-93358840	0.00043628	-2.33225	0.0159757
ENSRNOG00000015455	Spr	4:116912350-116916236	0.000448205	-2.5142	0.0163759
ENSRNOG00000017290	Zfp335	3:161357277-161376119	0.000462217	2.32098	0.0168317
ENSRNOG00000013279	LOC681458	1:263968133-264004008	0.000476153	3.30188	0.0172363
ENSRNOG00000060235	AABR07044837.2	20:23073500-23083780	0.000489476	17.8701	0.0176292
ENSRNOG00000001052	Slc25a30	15:57813355-57834173	0.000499534	2.9132	0.0179207
ENSRNOG00000014142	Ogfrl1	9:29634178-29647903	0.000512329	2.37666	0.0183119
ENSRNOG00000053230	Fopnl	10:730246-751061	0.000513873	-2.69919	0.0183471
ENSRNOG00000049215	Cbx2	10:108132104-108140935	0.000536615	5.02085	0.0190168
ENSRNOG00000002373	Akap1	10:76151037-76166276	0.000552949	-2.50811	0.0194466
ENSRNOG00000014674	Exosc9	2:123264693-123294880	0.000592411	-2.47335	0.0206359
ENSRNOG00000004135	RGD1311745	8:132029620-132036472	0.000599347	-2.50606	0.0208333
ENSRNOG00000051253	LOC102553828	1:133713280-133717580	0.000602896	7.95464	0.0209346
ENSRNOG00000008292	Hif1a	6:96810906-96856052	0.000607652	-2.06484	0.0210552
ENSRNOG00000019869	Lrfn1	1:85291461-85300825	0.000656306	-2.46413	0.0225275
ENSRNOG00000010630	Prcp	1:157701088-157750169	0.000685565	3.13829	0.0233217
ENSRNOG00000047581	AABR07066700.1	9:12472371-12588253	0.000688959	-3.43566	0.0233557
ENSRNOG00000003526	Sytl4	X:104765293-104814145	0.00071816	-2.45429	0.0241712
ENSRNOG00000002474	Tom1l1	10:78173846-78219793	0.000758951	-3.89767	0.0253366
ENSRNOG00000018467	Mitd1	9:44472364-44560837	0.000758951	-3.47648	0.0253366
ENSRNOG00000000275	Fam13c	20:19360229-19479325	0.000776185	2.5456	0.0258072
ENSRNOG00000027260	Adprh	11:64861767-64868108	0.000800455	-2.06835	0.0265336
ENSRNOG00000012404	Thrsp	1:162381252-162385575	0.000804241	-3.6235	0.0266055
ENSRNOG00000010078	Spag1	7:74994604-75054293	0.000811624	-2.86244	0.02676
ENSRNOG00000059492	LOC100365363	1:60884760-60894948	0.000811624	-2.91726	0.02676
ENSRNOG00000020325	Calhm2	1:266908368-266914093	0.000827362	3.38323	0.0271518
ENSRNOG00000029394	Dusp8	1:215030428-215033460	0.000827362	3.43027	0.0271518
ENSRNOG00000058039	Acta2	1:252537614-252550394	0.000880868	2.14718	0.0286788
ENSRNOG00000009754	Nampt	6:52122084-52156472	0.000884756	2.03313	0.0287769
ENSRNOG00000005426	Snupn	8:61615649-61648390	0.000892389	-2.51182	0.0289774
ENSRNOG00000020726	Sipa1	1:221006339-221015929	0.000892683	2.11494	0.0289774
ENSRNOG00000003119	Gc	14:20266890-20302581	0.000979415	6.90724	0.0315128
ENSRNOG00000003893	Ccnjl	10:29123272-29182568	0.000979415	9.43453	0.0315128
ENSRNOG00000001861	Ydjc	11:88090920-88093516	0.00102033	-2.35994	0.0326693
ENSRNOG00000008572	Ppcs	5:138466292-138470096	0.00102764	-2.60824	0.0328396
ENSRNOG00000016032	Cnnm3	9:43093137-43108486	0.00109679	-2.49246	0.0347791
ENSRNOG00000028254	Tmem141	3:2843634-2845593	0.00120789	-2.71833	0.037577
ENSRNOG00000011111	Cipc	6:110968060-110990912	0.00121869	-2.52421	0.0378416
ENSRNOG00000018567	Slc20a1	3:121725858-121739173	0.00126	2.26191	0.0389404
ENSRNOG00000033133	Nae1	19:653509-680378	0.00127826	-2.63626	0.0392222
ENSRNOG00000014946	AABR07005588.1	1:189457582-189460844	0.0012825	-2.2206	0.0393033
ENSRNOG00000005059	LOC100911917	3:4861752-4866833	0.00131676	-6.66929	0.0401288
ENSRNOG00000061031	Fzd8	17:62262128-62265113	0.00132737	-3.75831	0.0403028
ENSRNOG00000001374	Rasal1	12:41416217-41448668	0.00141909	-2.33888	0.0427327
ENSRNOG00000011398	LOC103692719	6:136150784-136250752	0.00143908	2.23217	0.0431824
ENSRNOG00000058677	Lsm8	4:45555076-45560943	0.00146227	-2.1071	0.0437126
ENSRNOG00000028733	Prkar1b	12:17614631-17712373	0.00149557	4.57812	0.0446268
ENSRNOG00000046382	Gatd1	1:214389254-214394411	0.00152158	-3.75622	0.0452387
ENSRNOG00000007412	Dok1	4:113864214-113866674	0.00167019	-3.41973	0.048949
ENSRNOG00000028403	Ptcd2	2:29570537-29598277	0.00167019	-3.01941	0.048949
ENSRNOG00000031081	Stat2	7:2691368-2707741	0.00169024	-2.14609	0.0494044
