# Supplementary figures and images for: Identification of Novel Mrna Isoforms Associated with Acute Heat Stress Response Using RNA-Sequencing Data in The Sprague-Dawley Rats
Source: Preprints.org preprint supplement (doi:10.20944/preprints202211.0380.v1), 2022-11-21

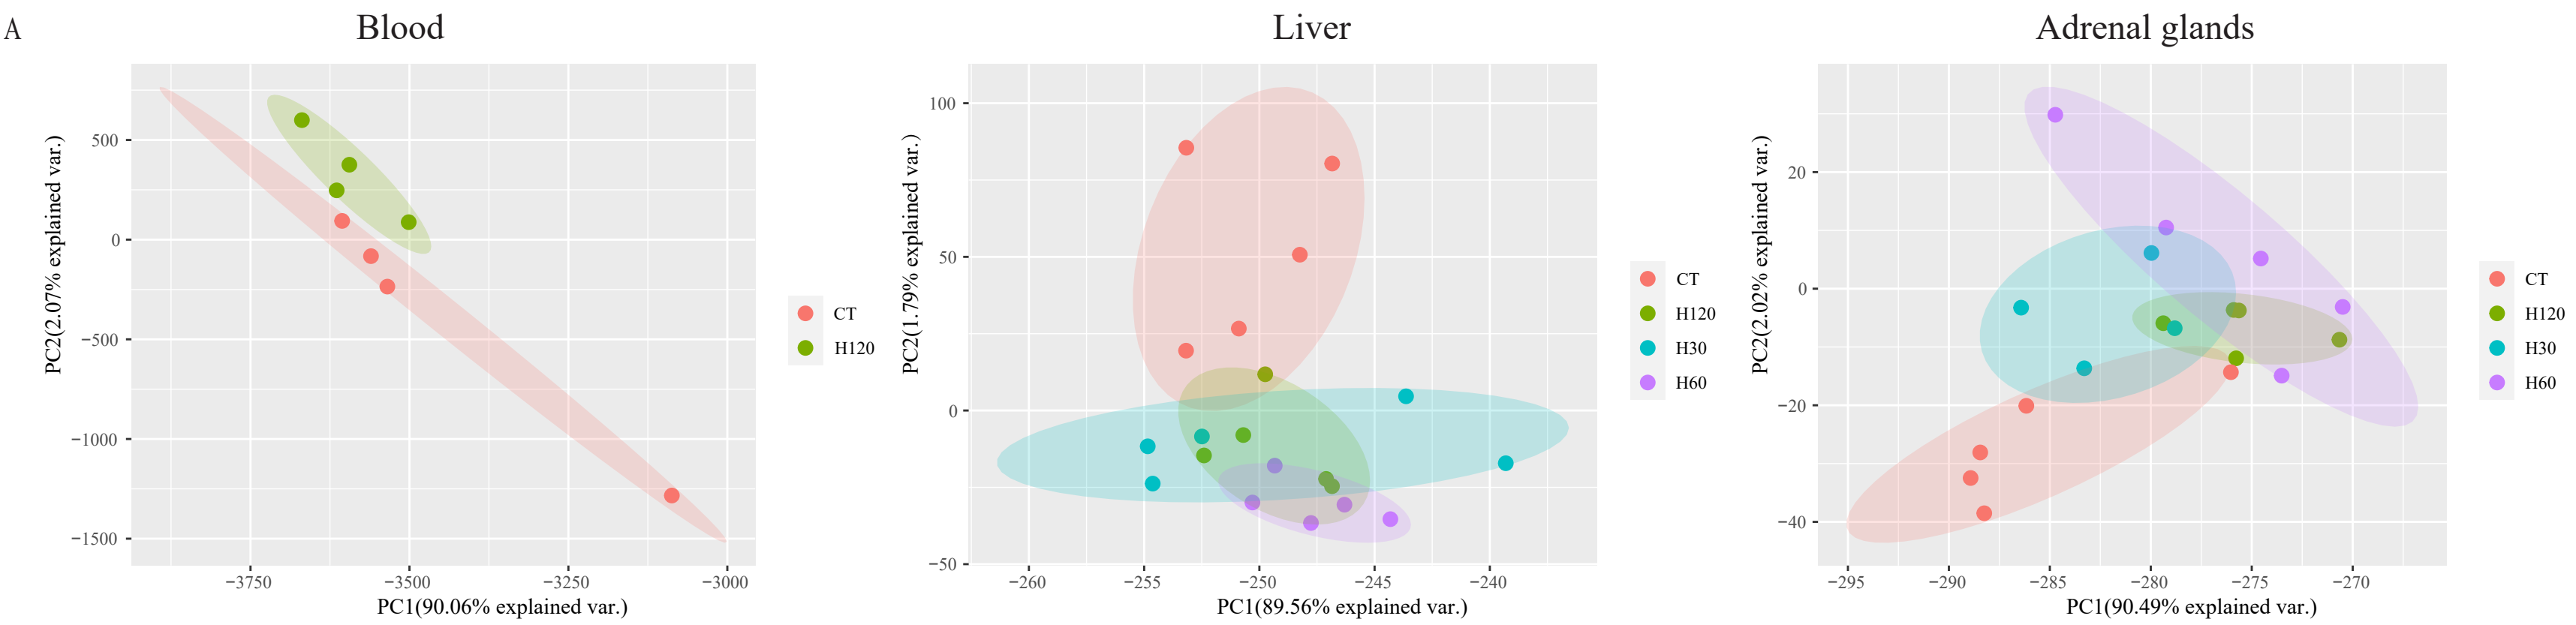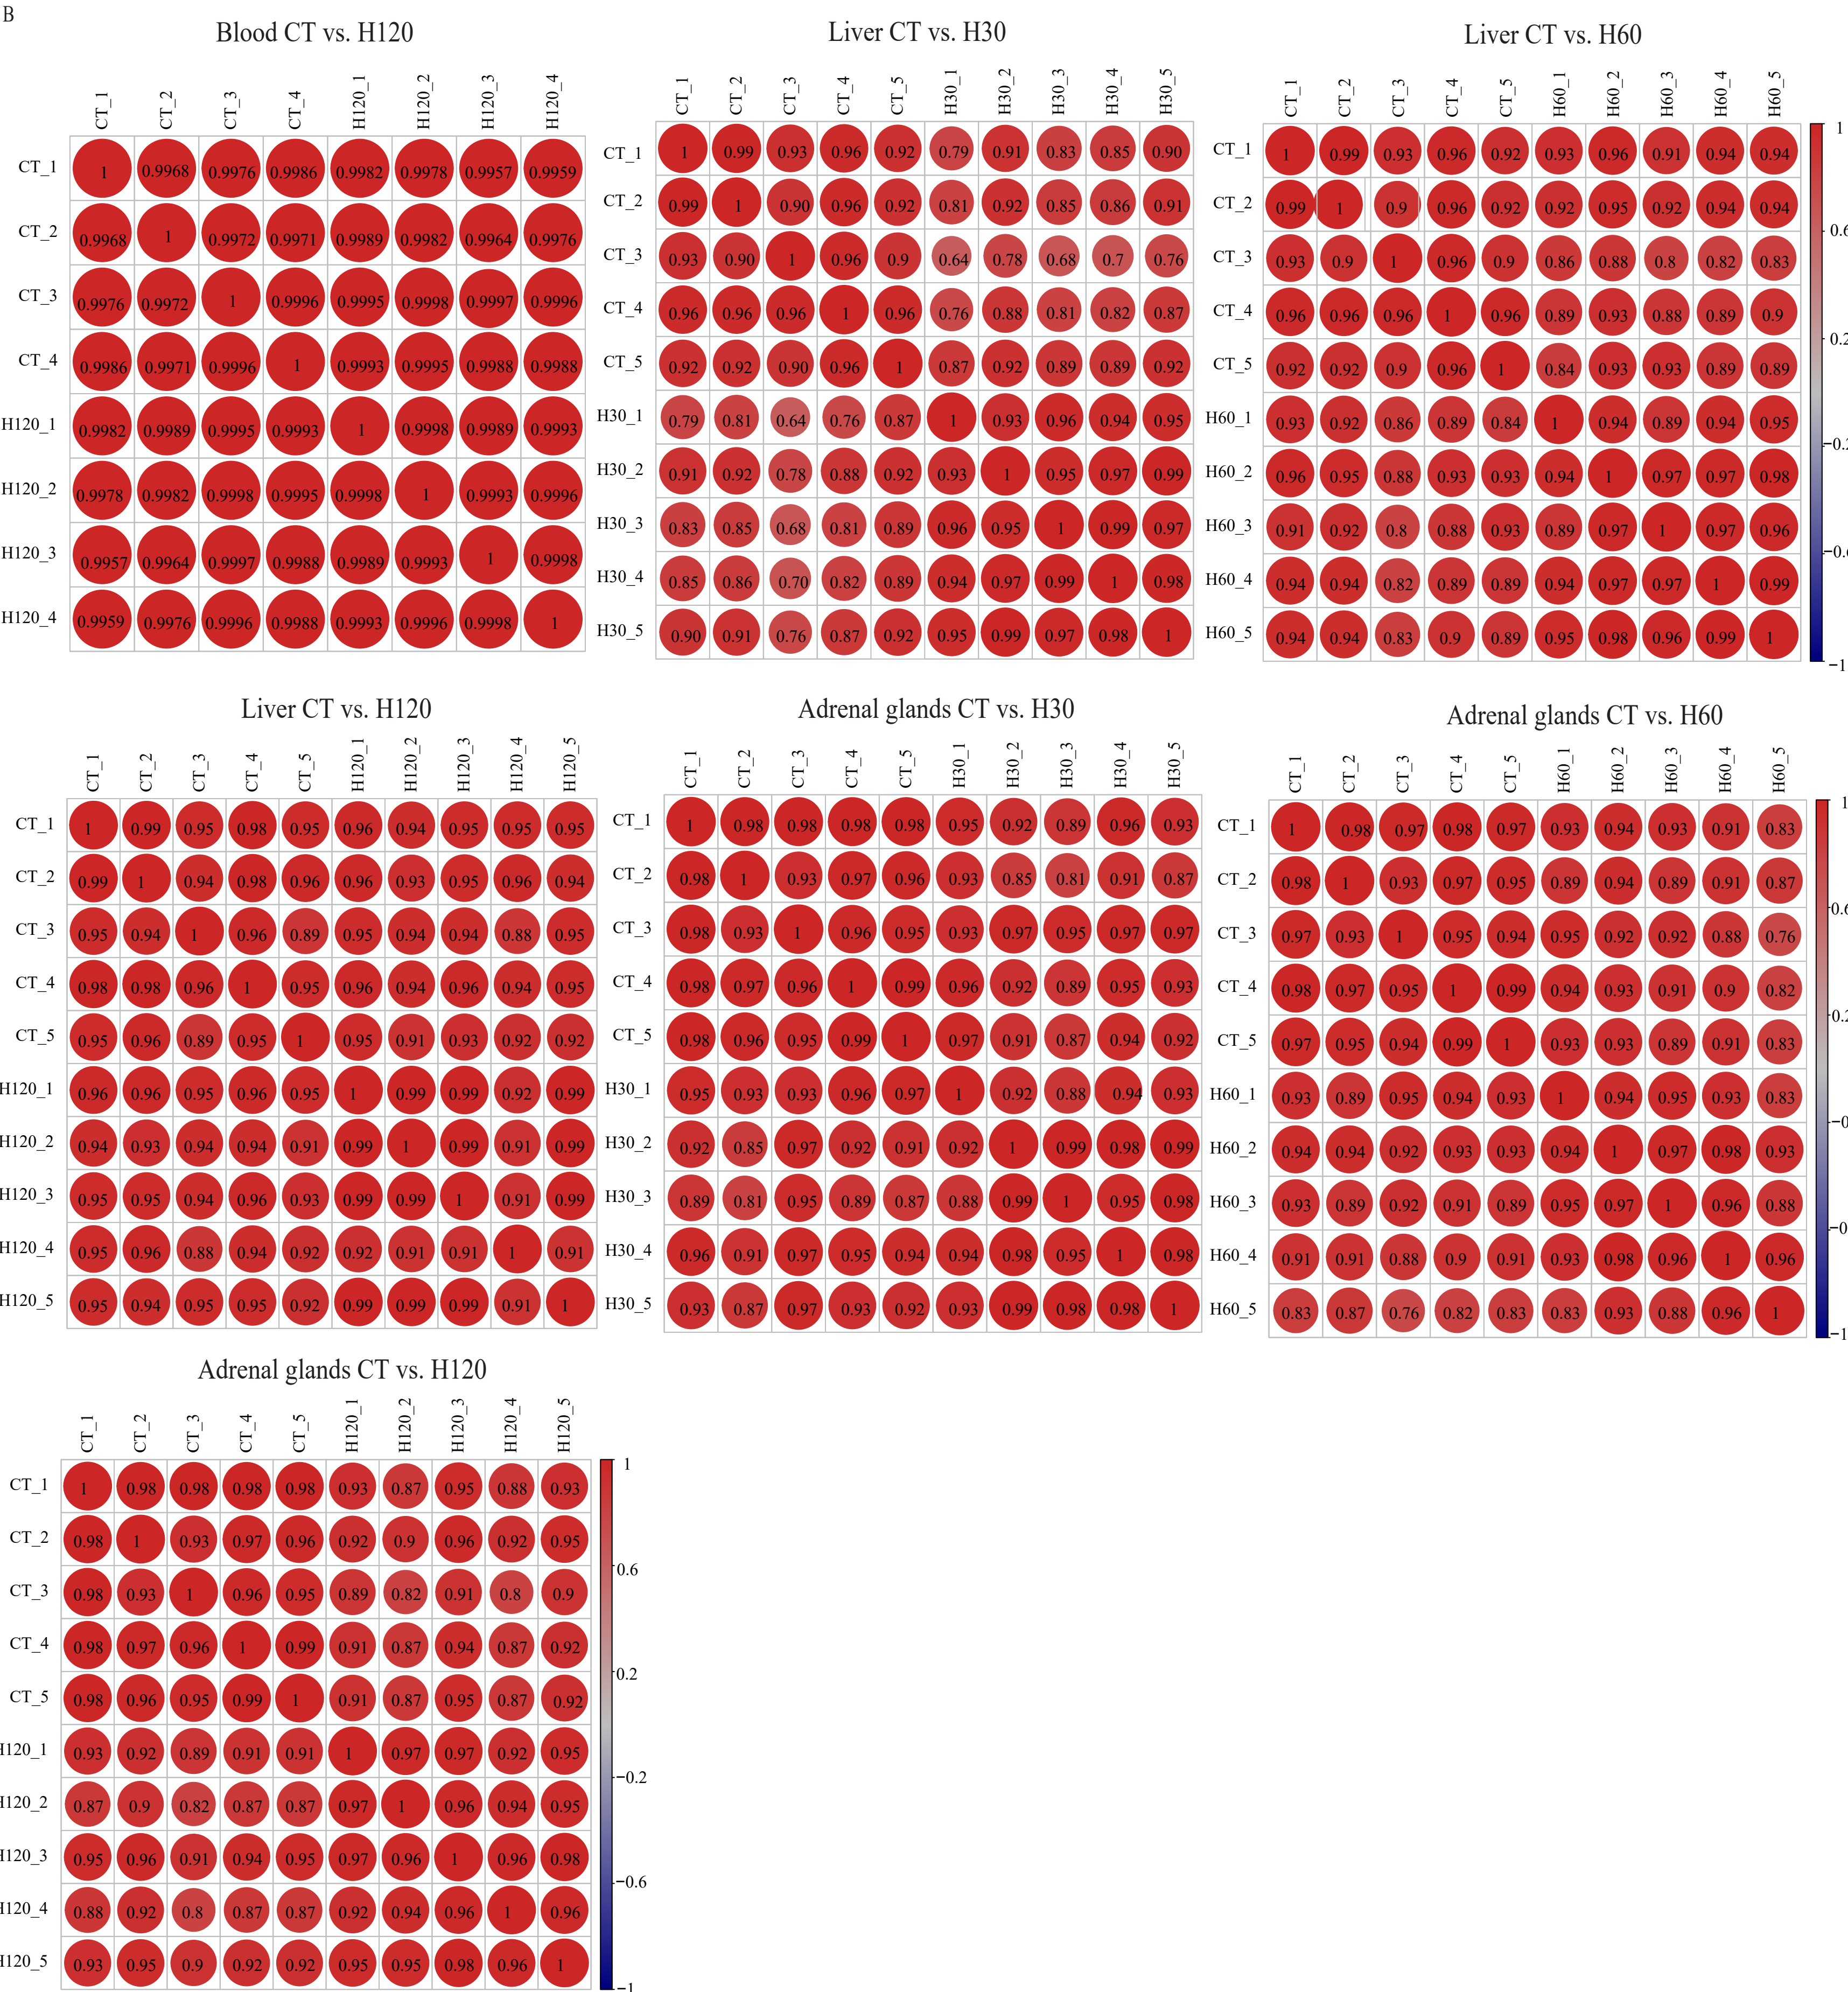

Supplement: Supplementary file 1 [file supplementary]
